# Supplementary material for: A Topological Map of the Compartmentalized Arabidopsis thaliana Leaf Metabolome
Source: PubMed Central journal article supplement (PMC3058050; doi:10.1371/journal.pone.0017806), 2011-03-15

**(Lactate)–189.5**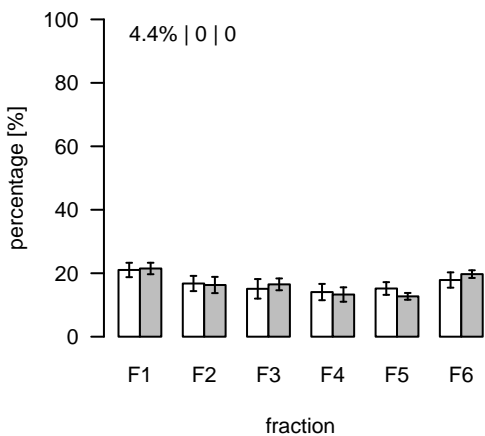**(2-Hydroxypyridine)–204.9**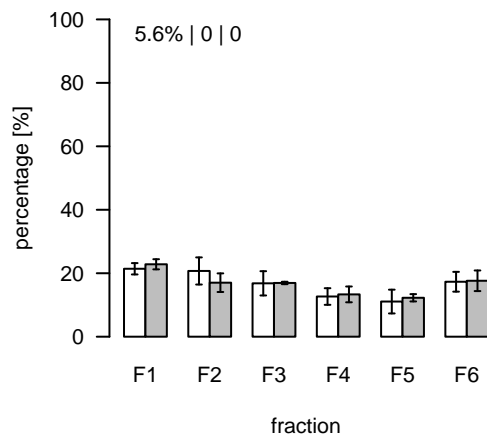**(Alanine)–209.0**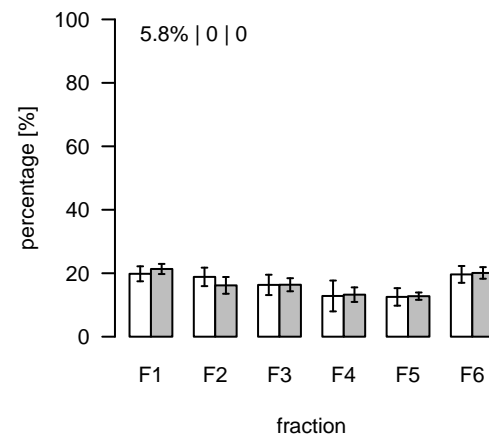**(Pyruvate)–222.7**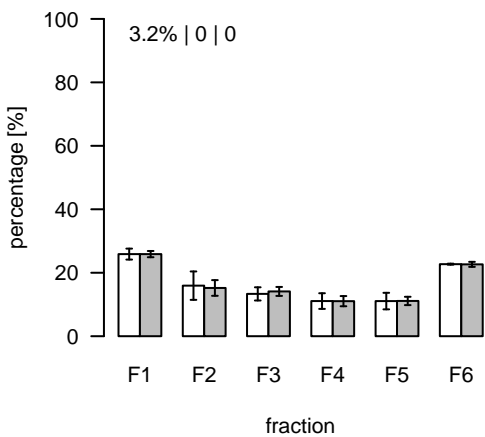**(2-Hydroxybutyrate)–226.4**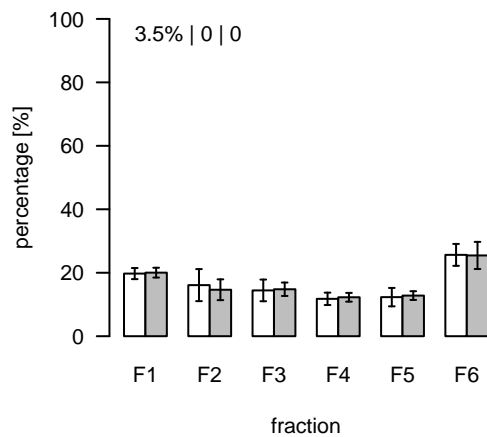**(2-Aminobutyrate)–249.5**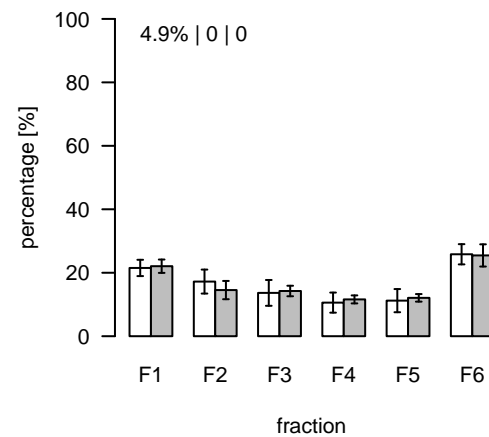**(2-Oxobutanoate)–252.6**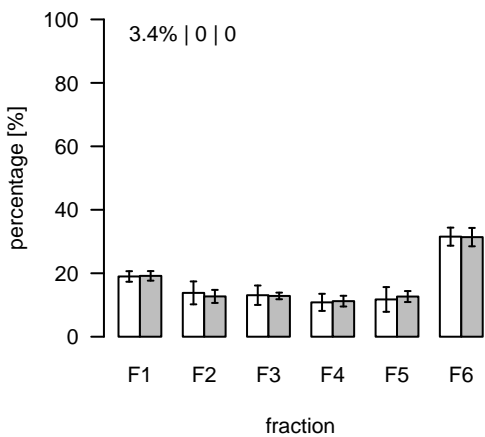**(Valine)–272.0**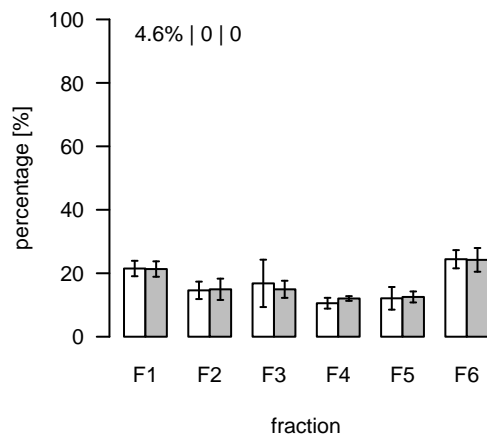**(Glycerol)–292.7**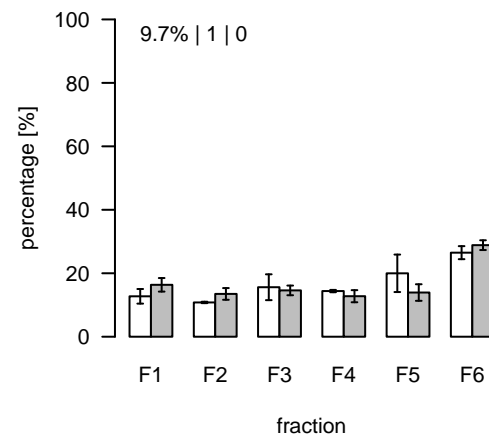

**(4-Hydroxypyridine)-293.9**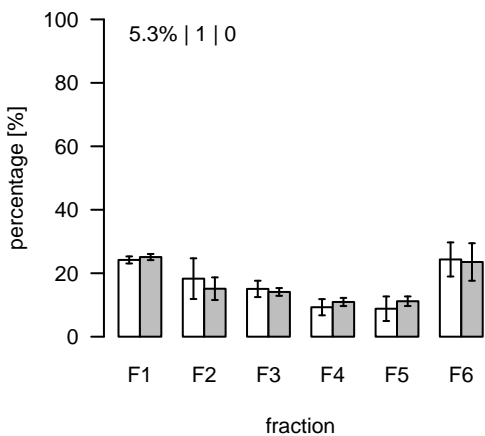**(Leucine)-305.4**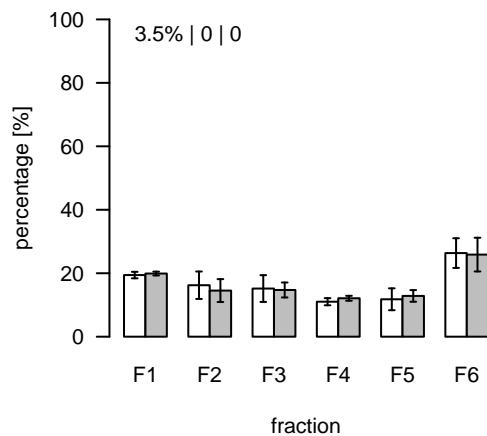**(Isoleucine)-319.6**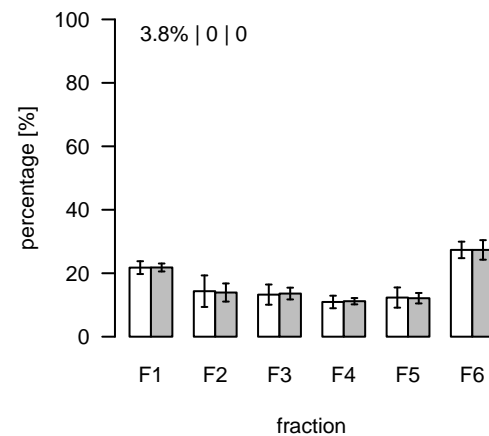**(Glycine (P1.1))-325.7**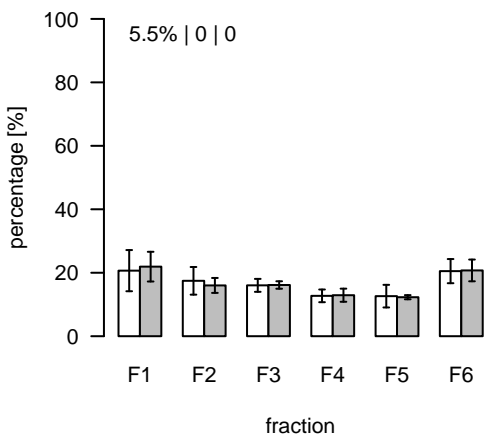**(Proline)-339.0**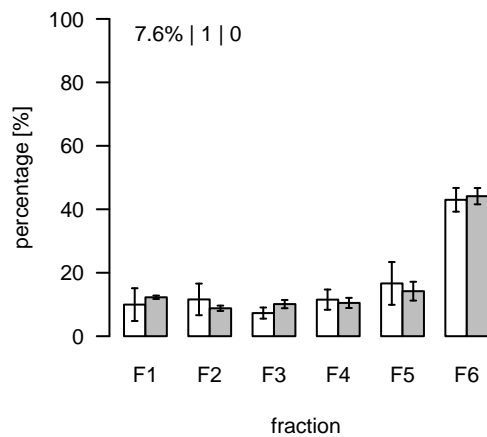**(Glycerate)-345.0**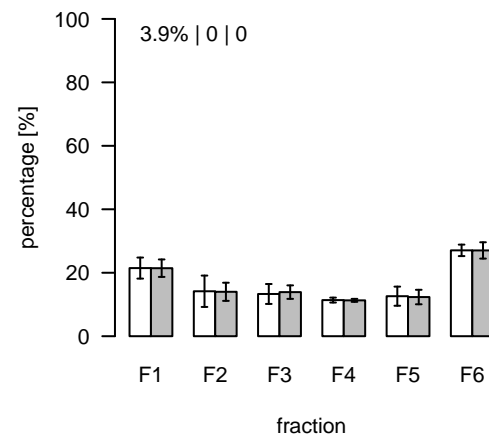**(Benzoate)-348.1**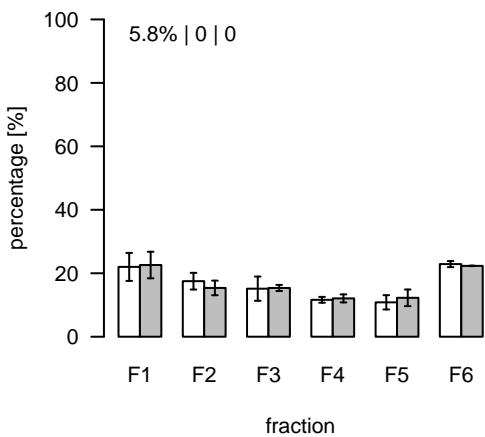**(Serine)-358.6**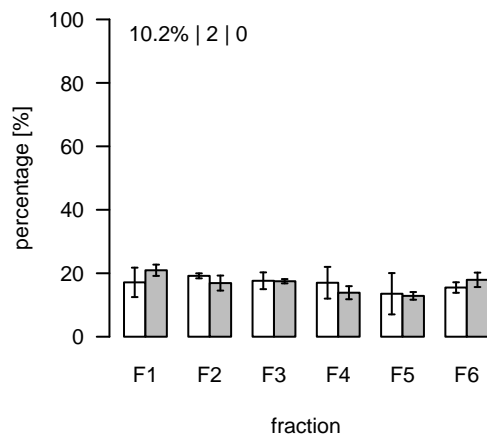**(Threonine)-368.1**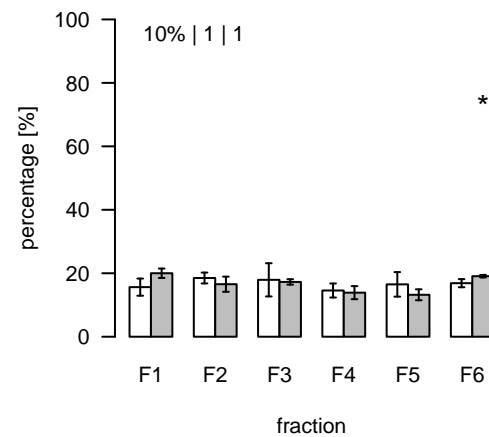

**(Fumarate (|Maleate))–372.0**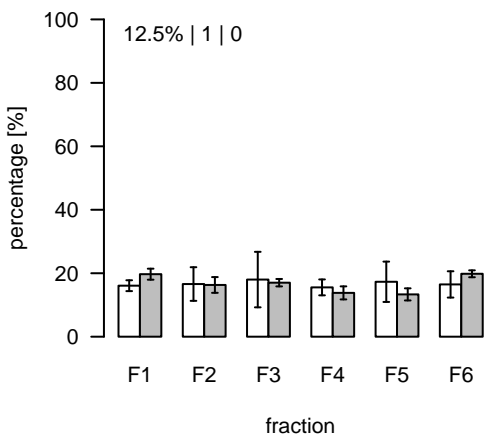**(Nicotinate)–386.1**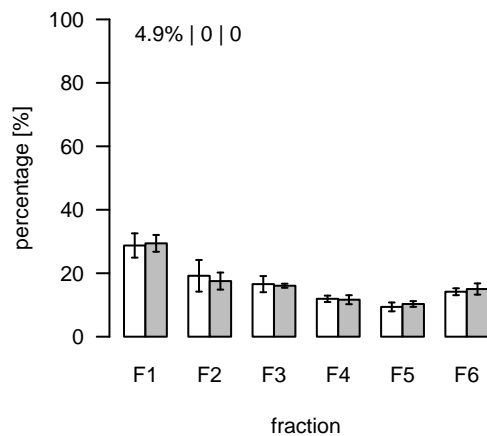**(Pyrrole–2–carboxylate)–388.5**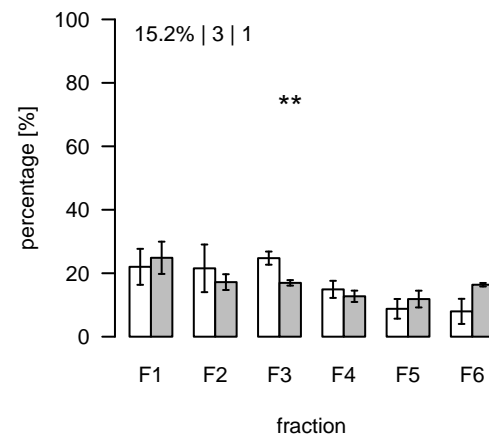**(b–Alanine (P1.1))–395.2**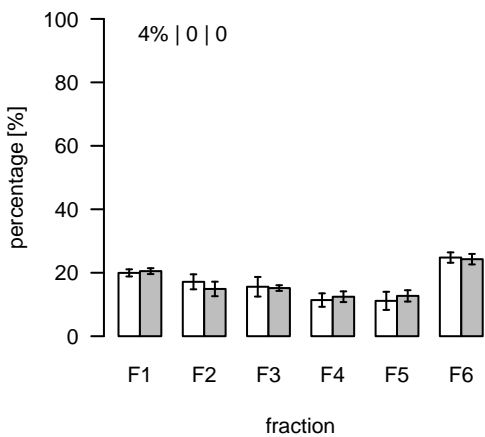**(Homoserine)–407.6**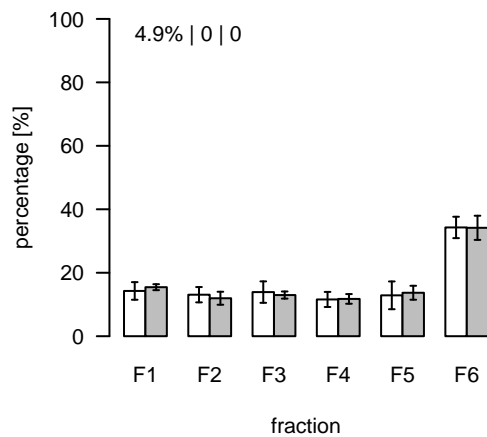**(Erythritol|Threitol)–409.3**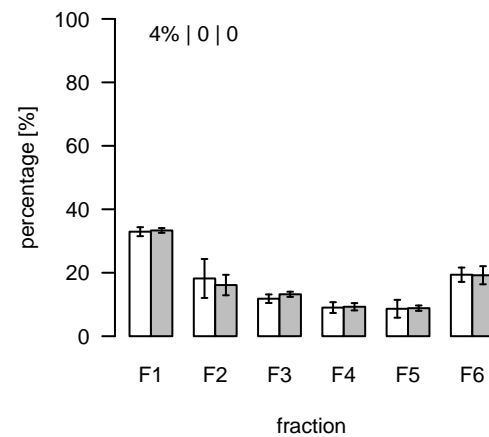**(Malate)–442.3**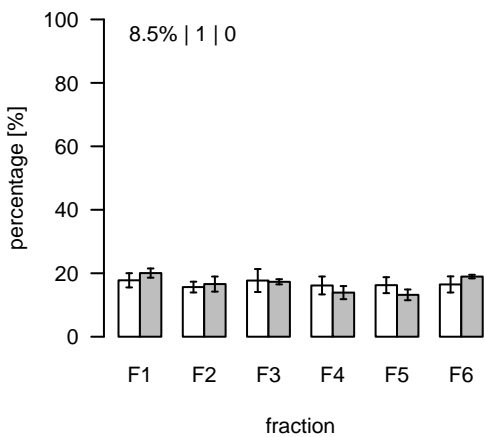**(trans–4–Hydroxyproline)–449.4**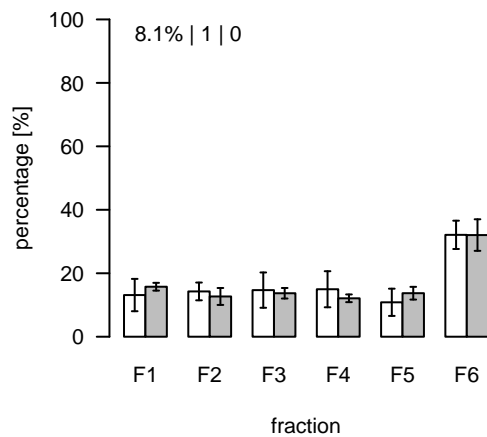**(4–Aminobutanoate)–453.6**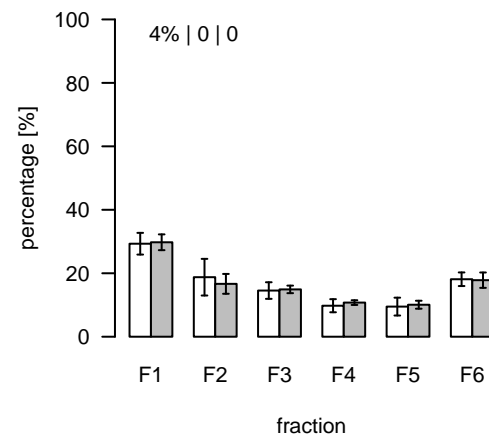

**(Aspartate)–457.9**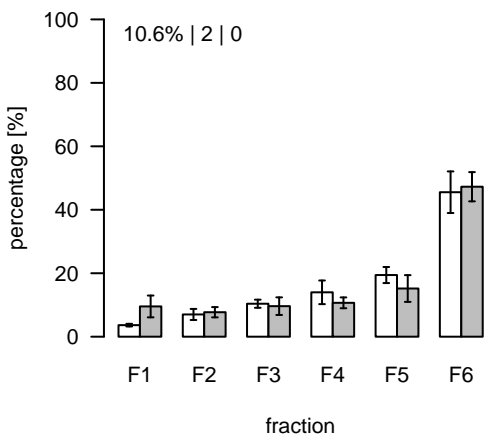**(Threonate)–458.6**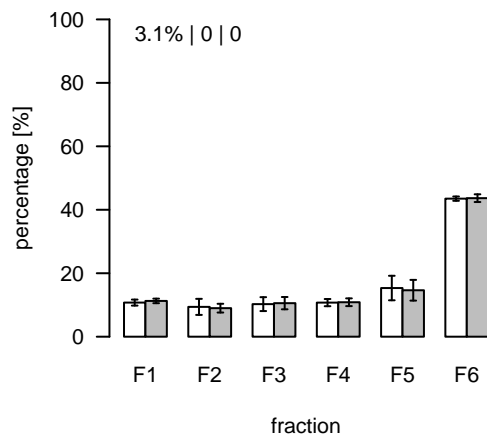**(Arginine)–491.1**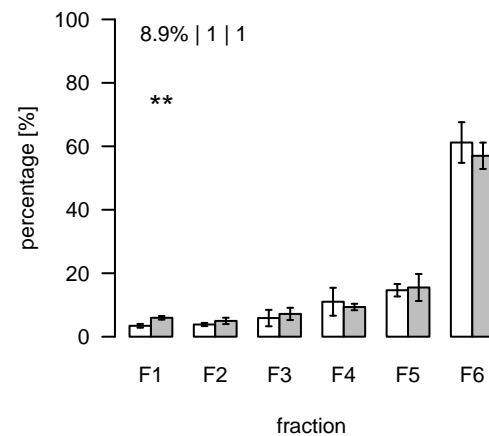**(Xylose (P1.2))–493.8**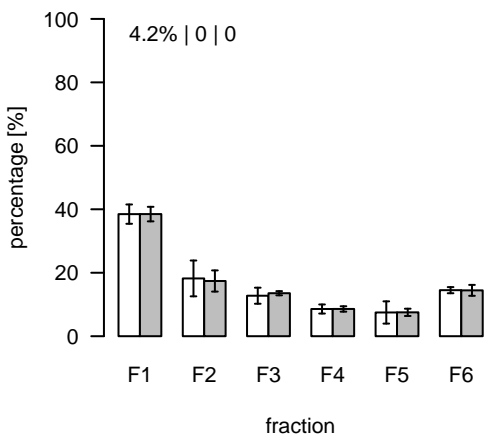**(Arabinose|Lyxose|Xylose)–498.2**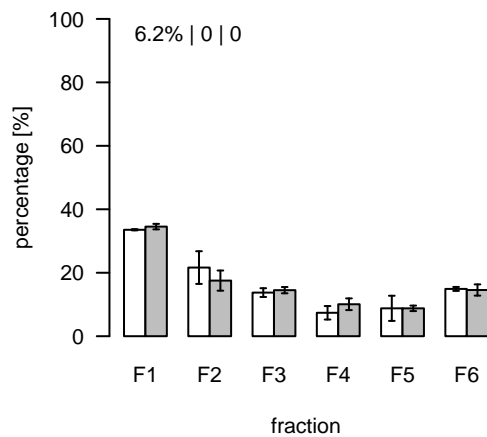**(Ribose (|Ribulose))–501.8**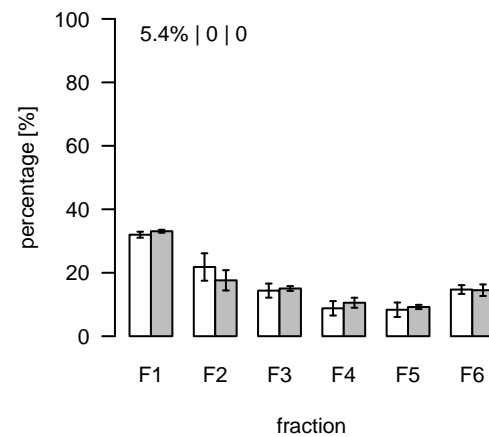**(5-Oxoproline)–507.0**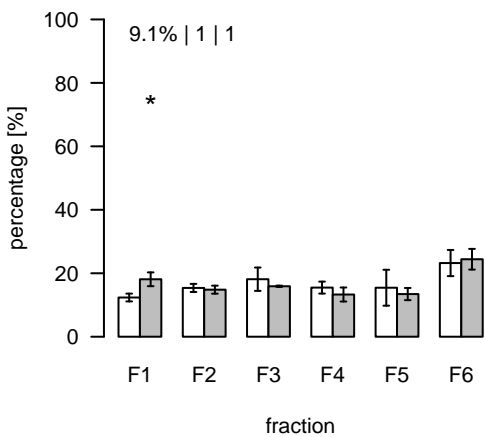**(Glutamate)–508.3**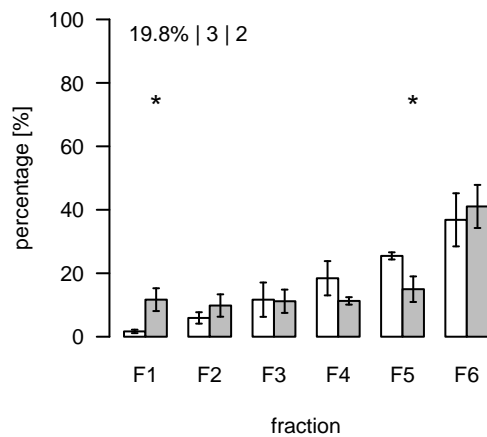**(Rhamnose)–516.6**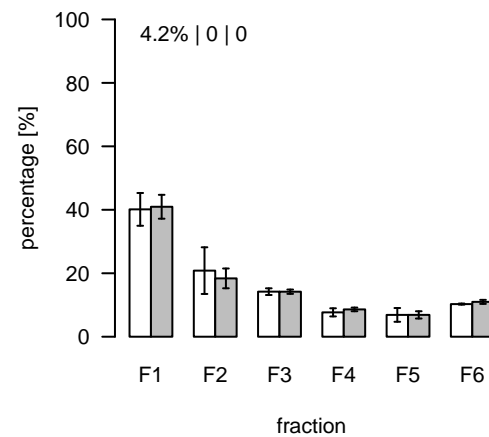

**(Putrescine (P1.1))–517.9**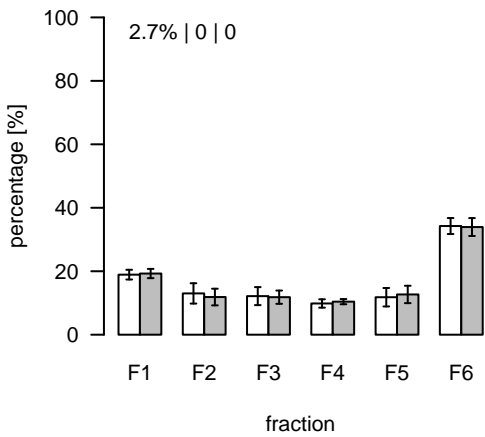**((Fucose|Epifucose) (P1.1))–523.0**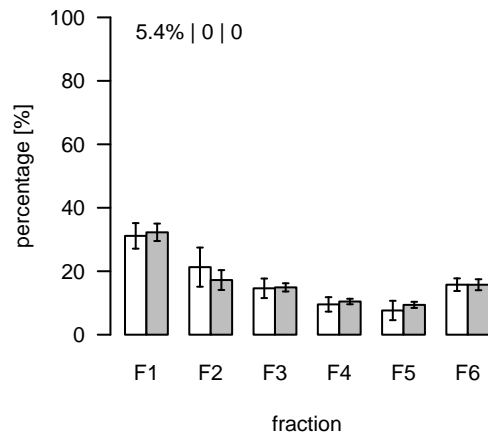**(Arabinono–1,4–lactone (P1.1))–526.0**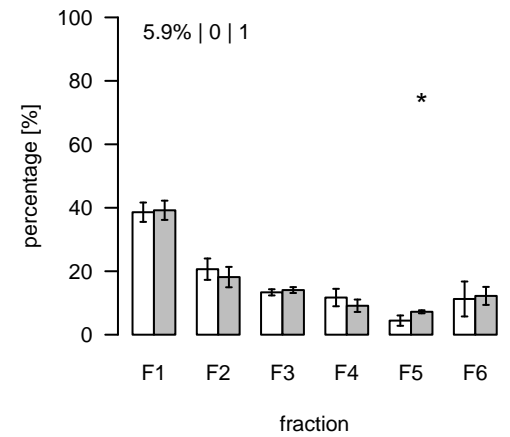**(Glutamine (P1.1))–530.6**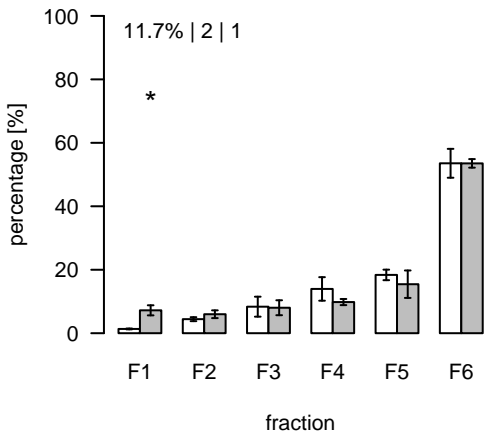**(Phenylalanine)–531.1**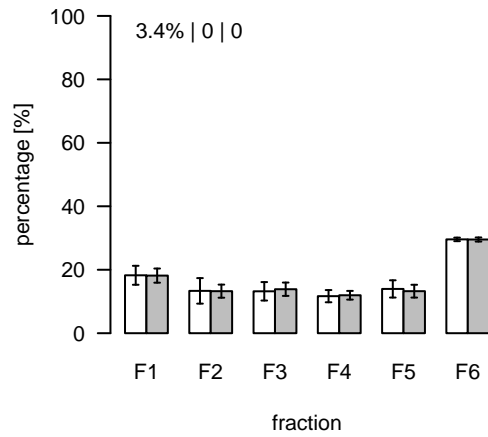**(4–Hydroxybenzoate)–535.8**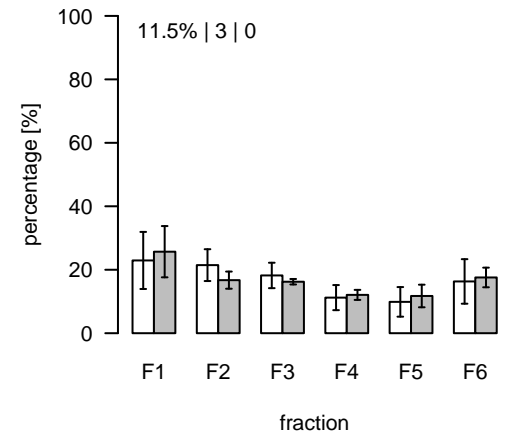**(Asparagine)–550.4**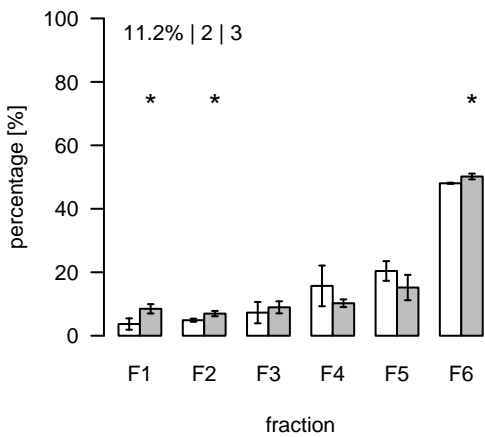**(Levoglucozan–like)–556.6–Exp**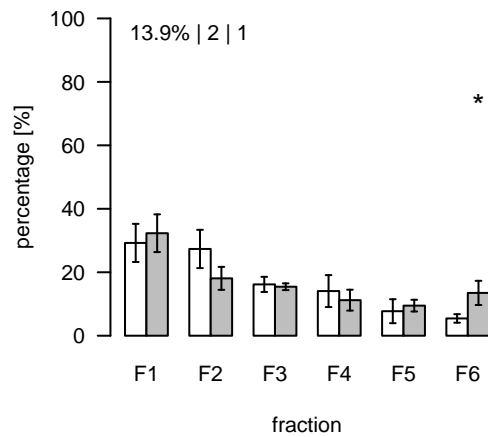**(2–Deoxygalactose)–562.4**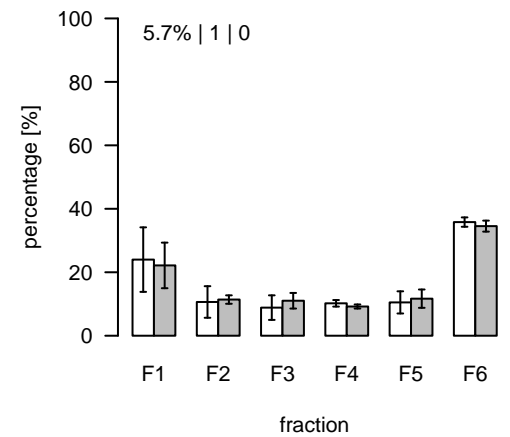

**(Psicose (P1.2))–573.7**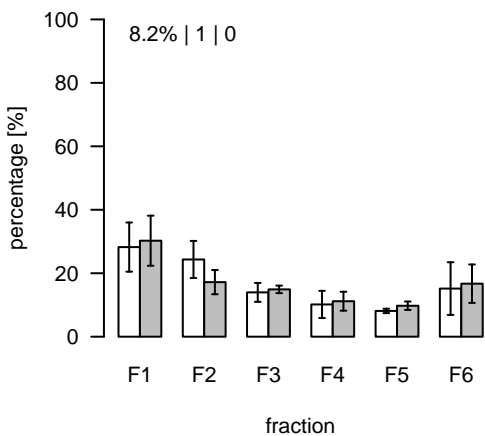**(Glycerol 3-P)–574.3**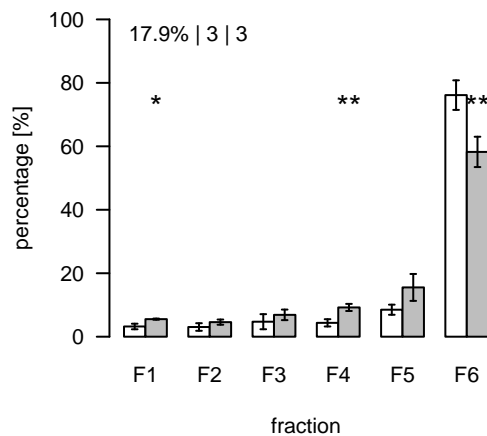**(Fructose (Psicose))–580.1**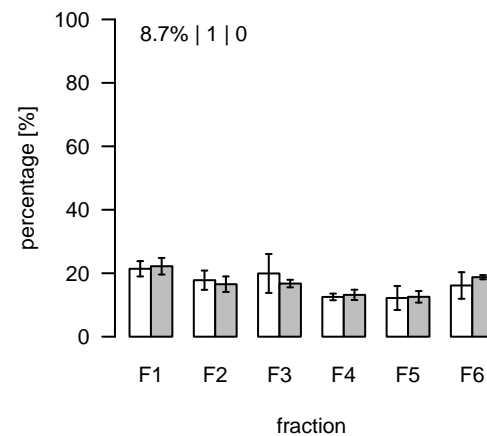**(Fructose|Sorbose)–586.0**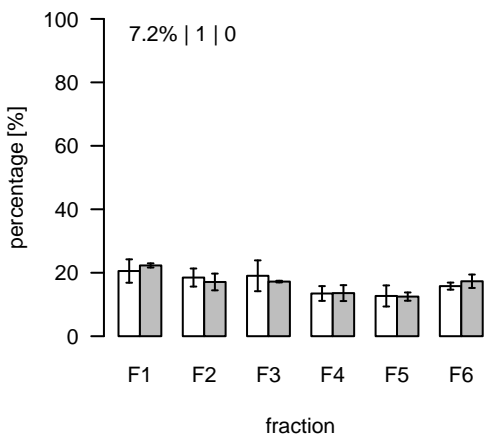**(Glucose (P1.1))–591.4**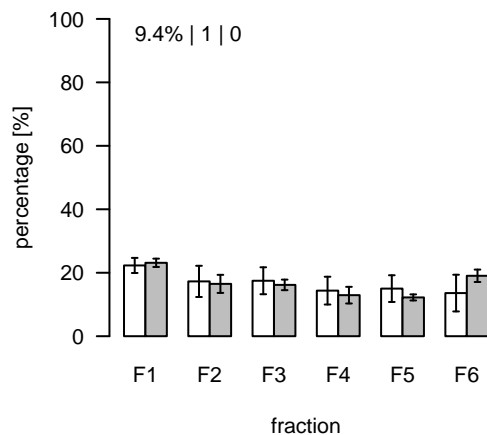**(Glutamine (P2.1))–598.8–Ref**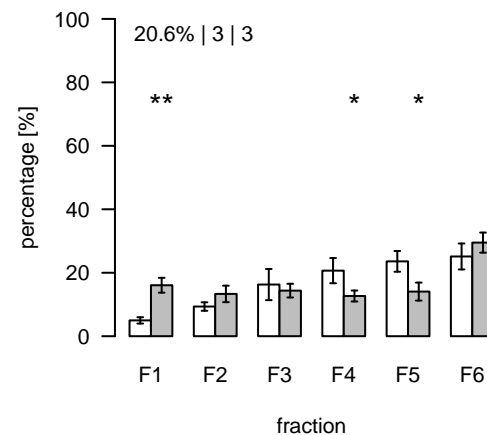**(Glucose (P1.2))–599.4**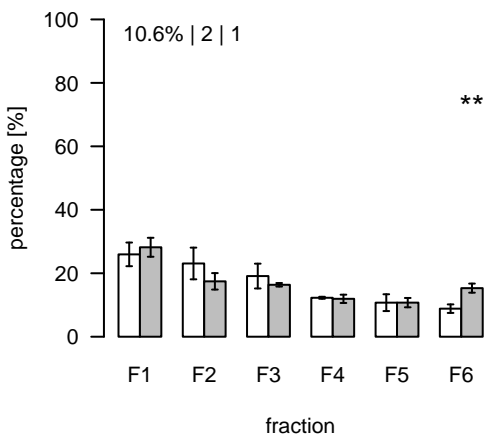**(Methylglucopyranoside)–613.6**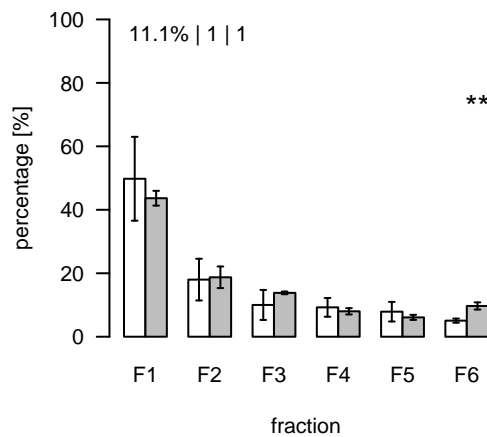**(Lysine (P1.1))–616.2**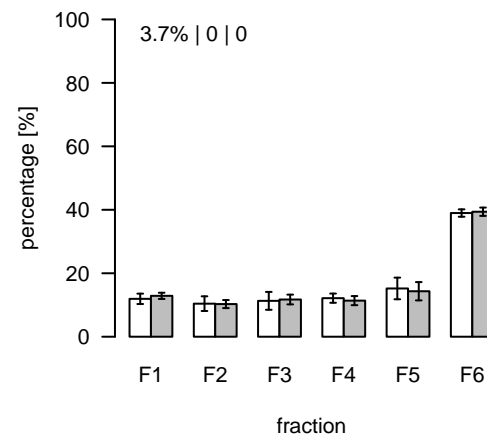

**(Galactono-1,4-lactone)-619.1**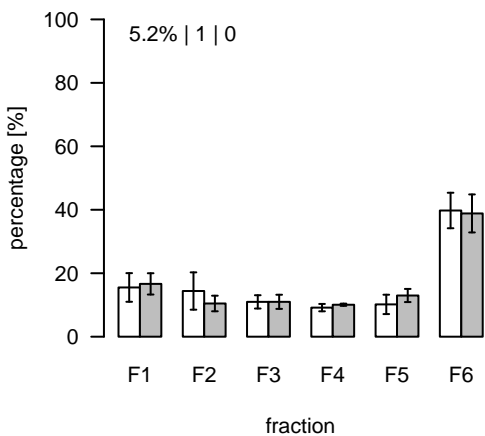**(Dehydroascorbate (P1.1))-625.5**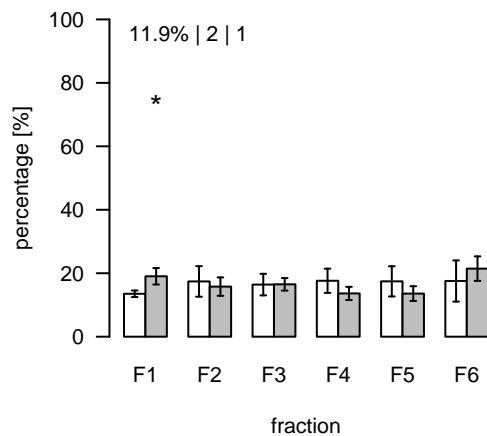**(Dehydroascorbate (P1.2))-635.9**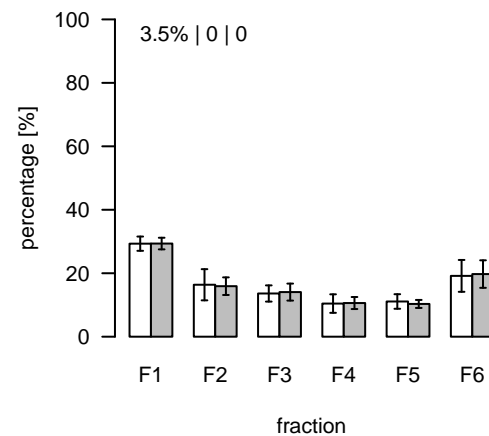**(Ascorbate)-651.8**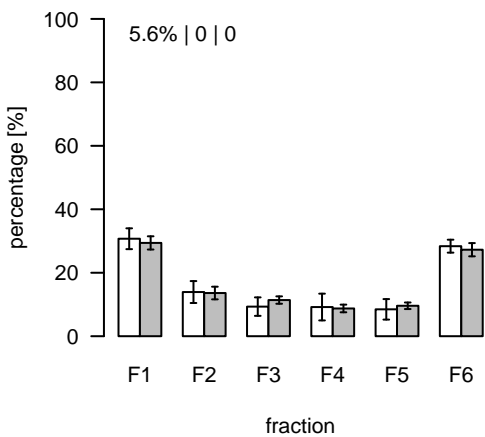**(myo-Inositol)-654.5**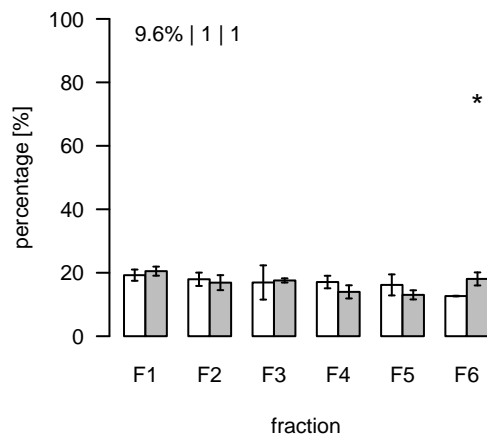**(Tyrosine)-659.1**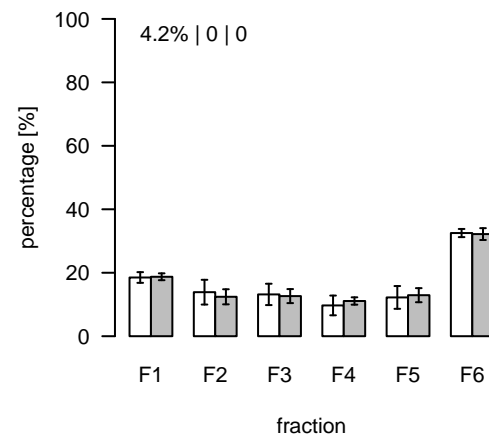**(Sinapyl alcohol)-662.4**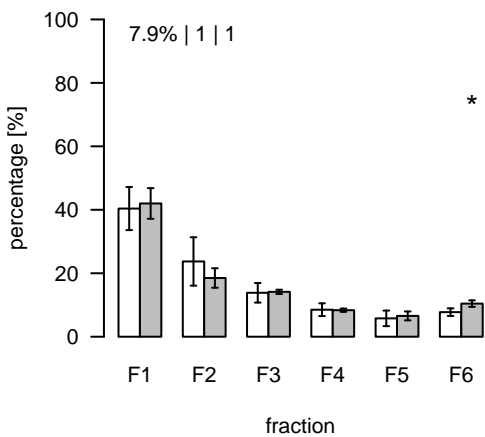**(N-Acetylgalactosamine (P1.2))-675.0**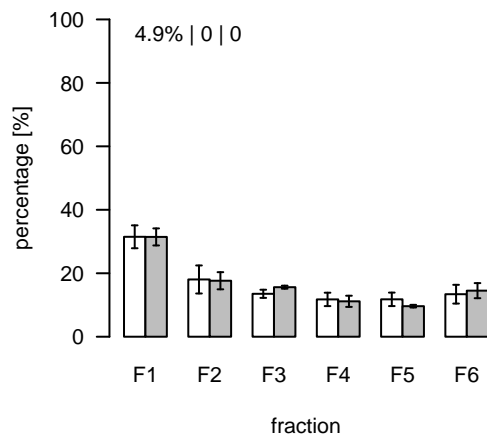**(N-Acetylmannosamine (P1.2))-680.9**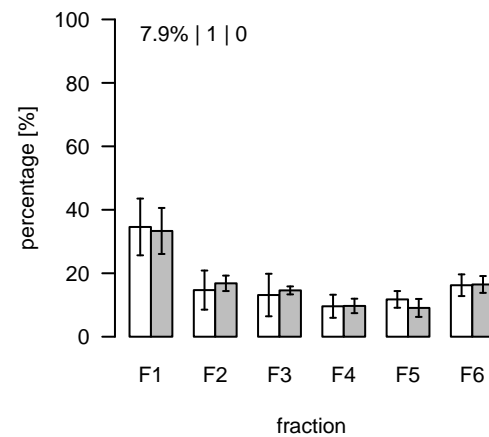

**(Hexanoate)–206.6–Exp**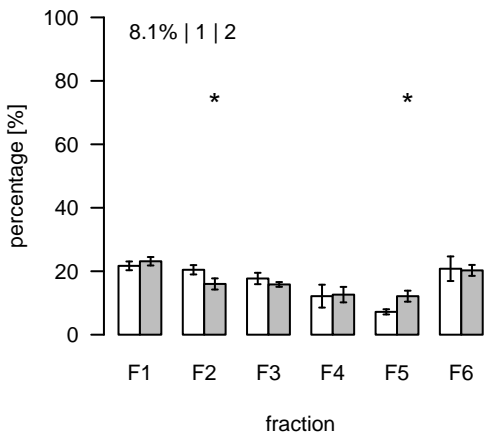**(Phytol (P1.2))–716.5**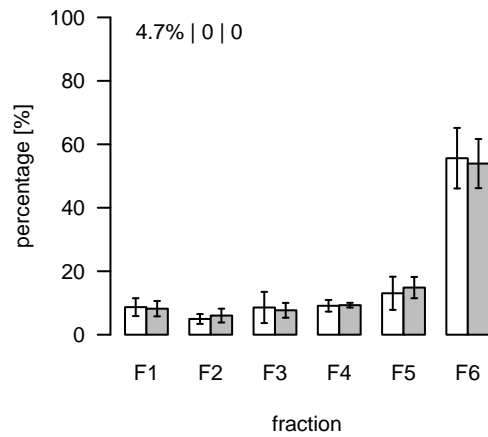**(3–Indoleacetonitrile)–724.0**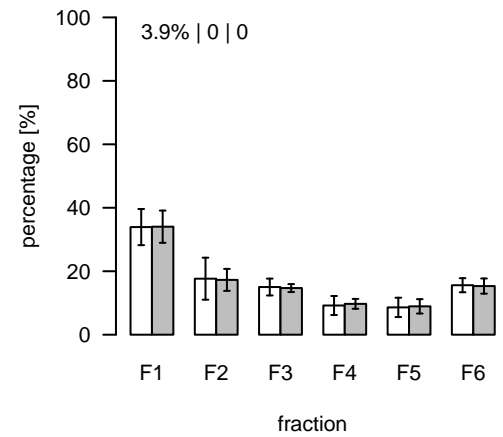**(Spermidine)–724.8**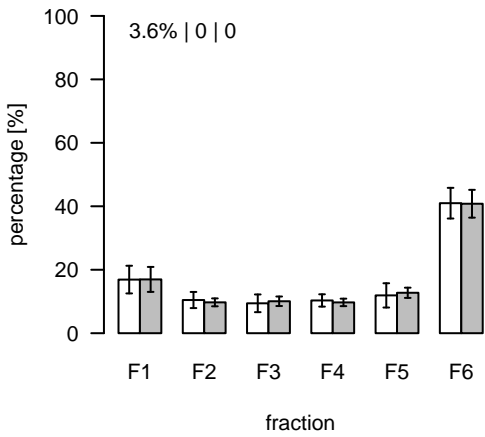**(Phytol (P1.1))–734.1**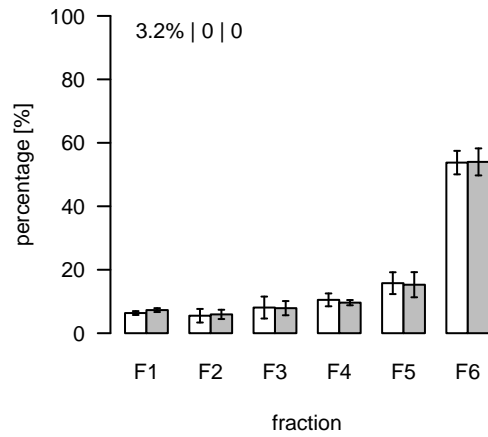**(Sinapate (P1.2))–752.8**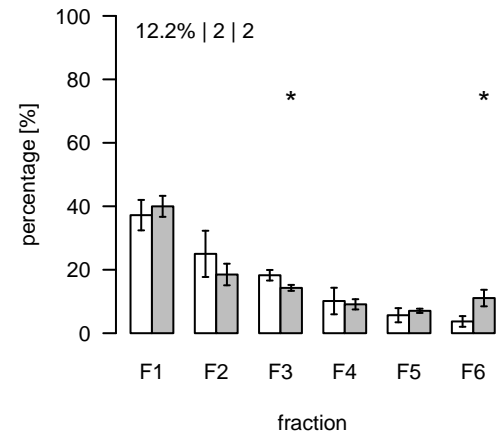**(Tryptophan)–791.1**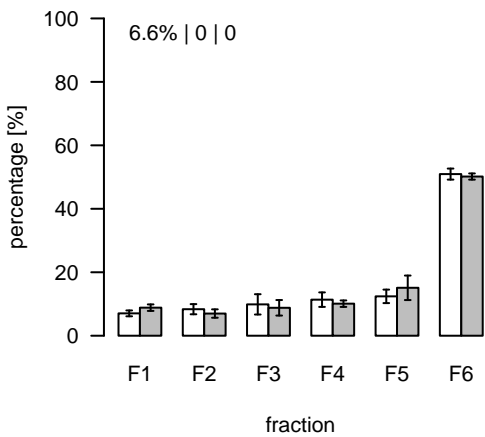**(Sinapate (P1.1))–817.9**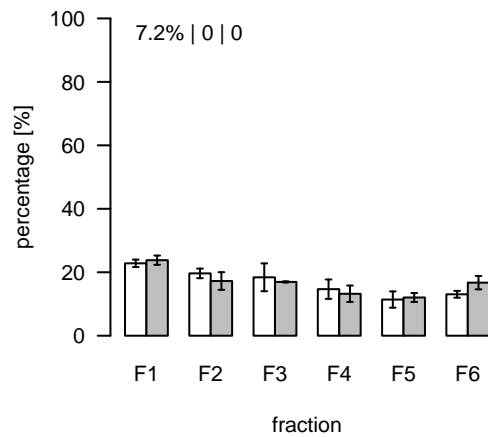**(Sucrose (P1.1))–841.4**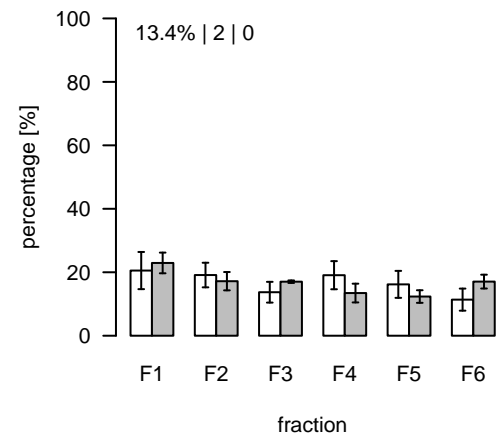



**(Lactose (Lactulose))–858.6**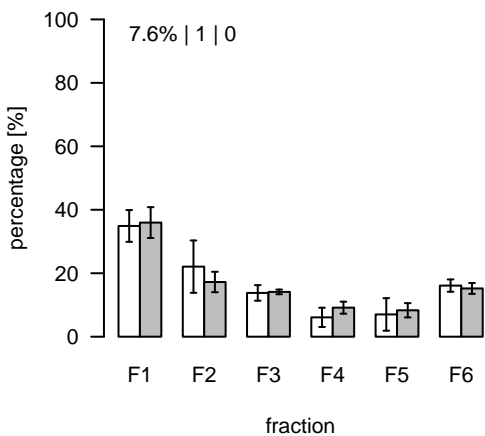**(Cellobiose)–862.3**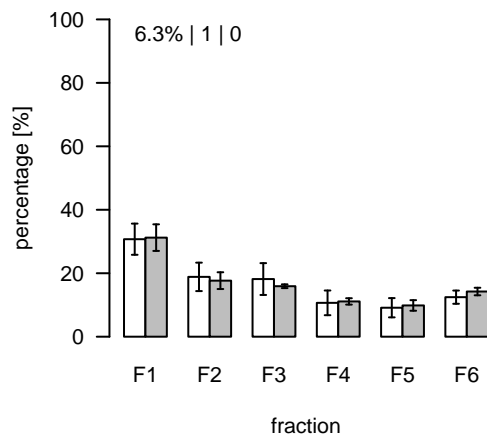**(Glycine (P2.1))–228.1–Exp**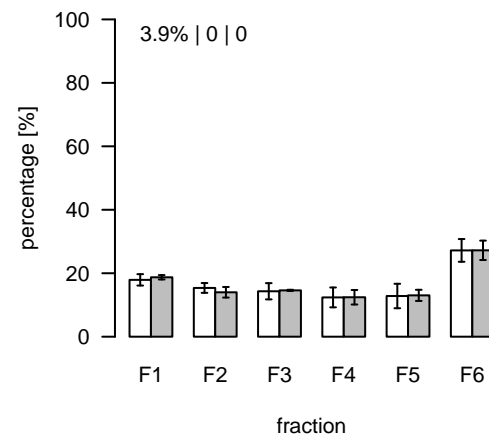**(Maltose|Laminaribiose)–871.0**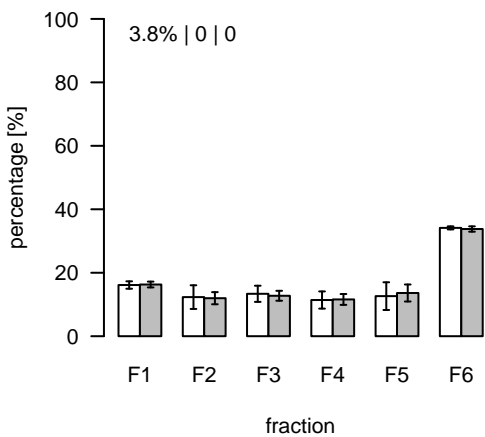**(Maltose (P1.2))–880.2**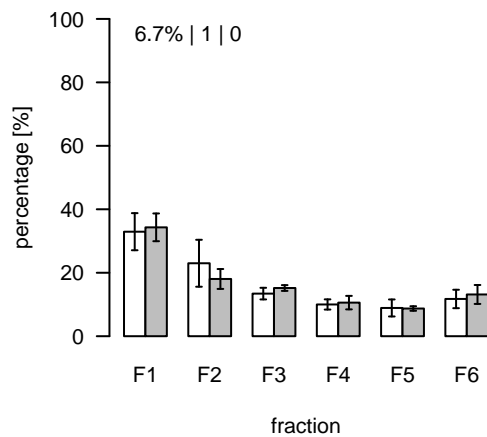**(Lactobionate-like)–891.7–Exp**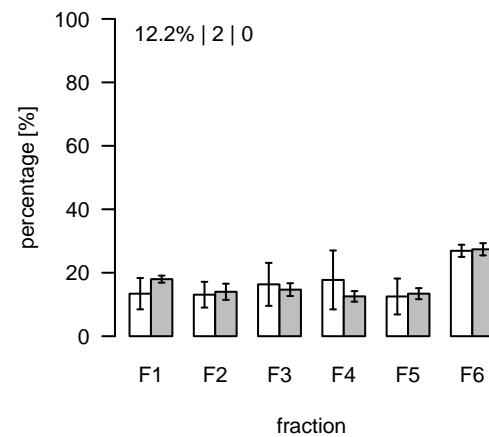**(Docosanoate)–904.0**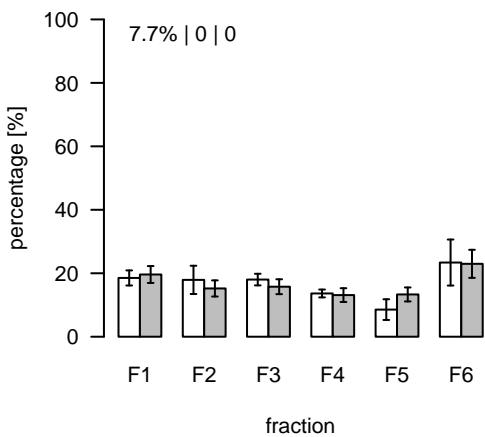**(Gentiobiose (P1.2))–909.7**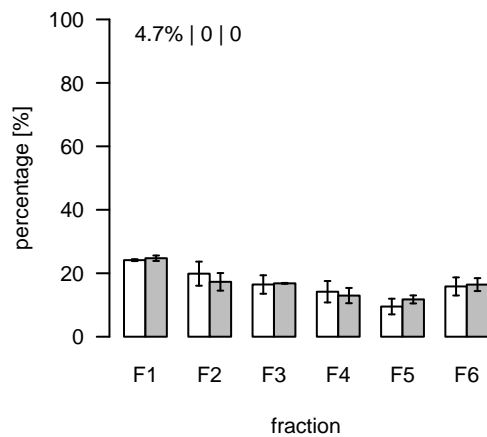**(Melibiose (P1.1))–914.3**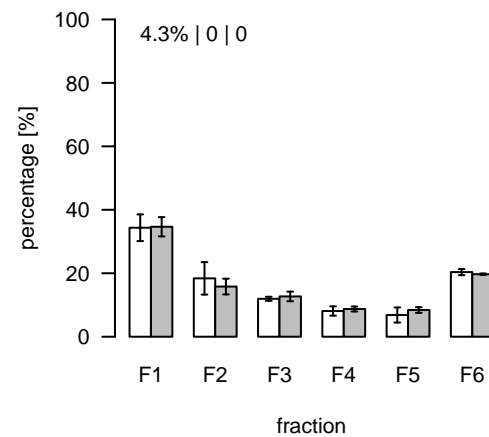

**(Galactinol)–940.2**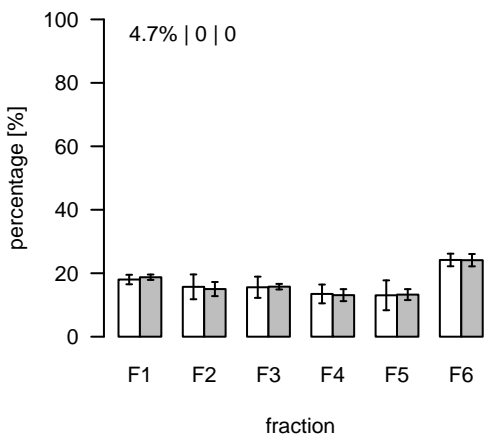**(Tetracosanoate)–963.6**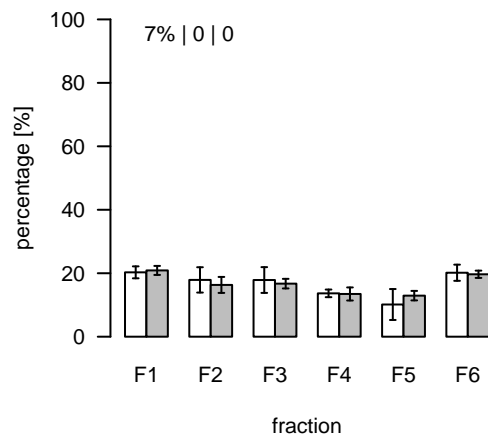**(3-Hydroxypyridine)–283.0–Exp**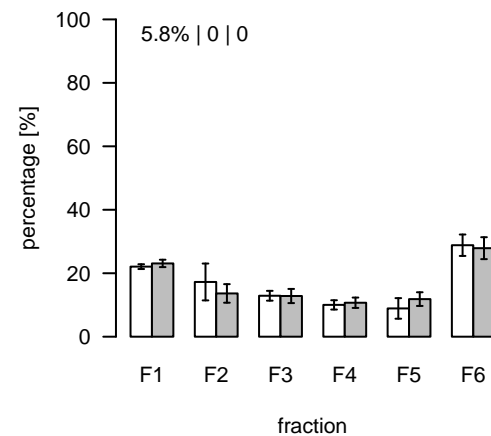**(Raffinose ([1-Kestose]Inulotriose))–1033.3**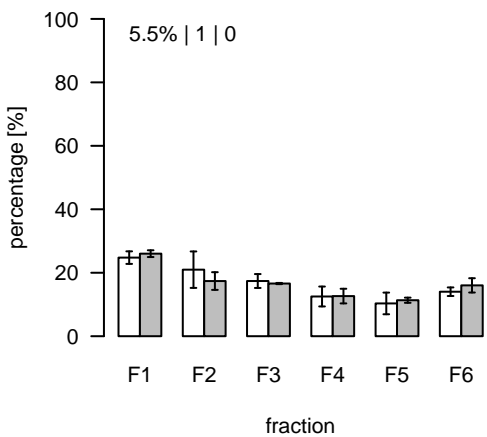**(Ethanolamine)–284.0–Exp**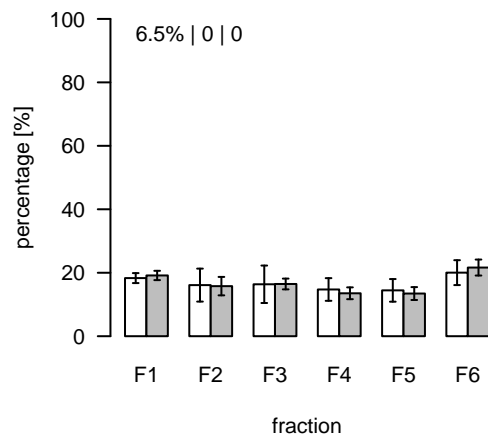**(Octacosanoate)–1072.0**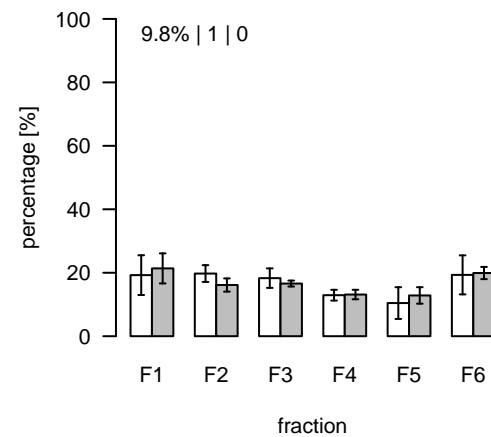**(Urea)–340.8–Exp**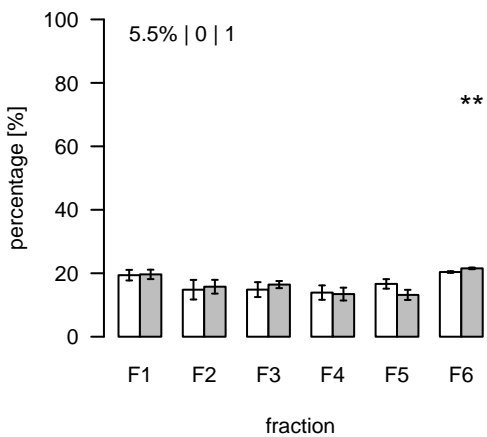**(Trehalose)–876.1–Exp**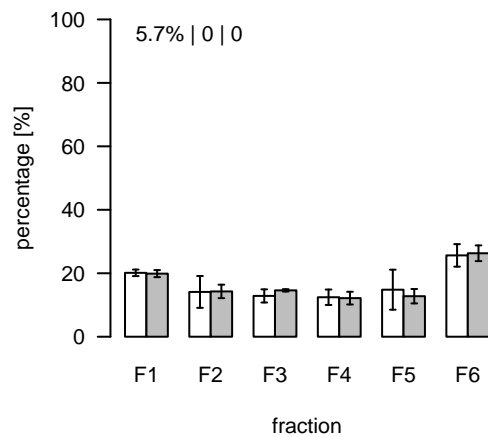**(Campesterol)–1107.3**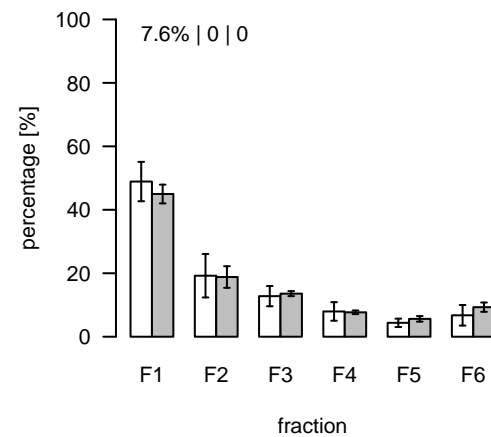

**(Triacantoate)-1121.7**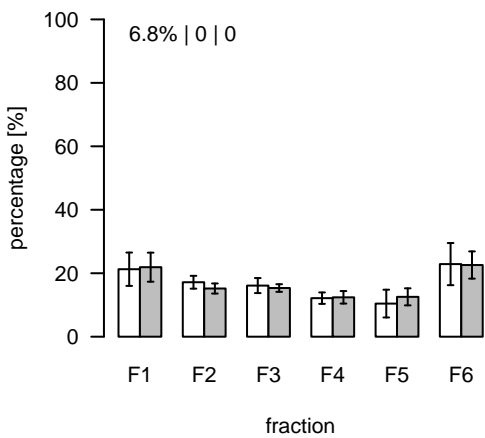**(Sitosterol)-1128.3**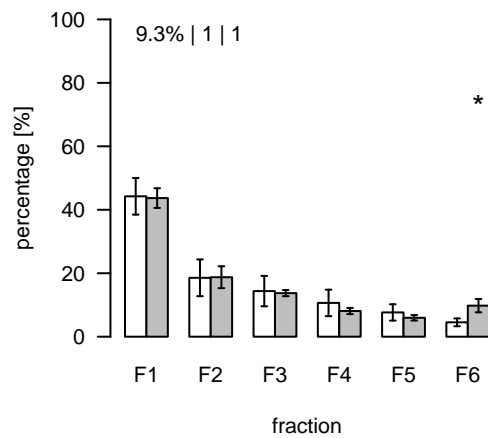**(Hexacosanoate)-1018.9-Exp**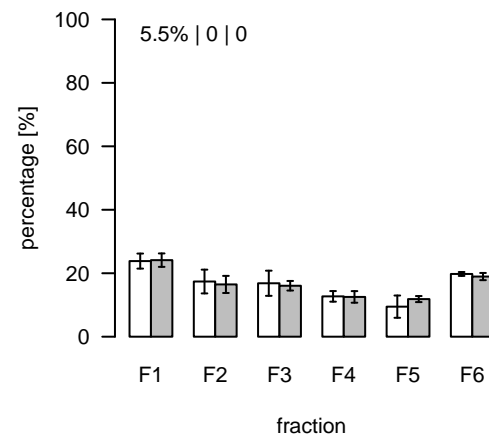**(Unknown)-203.4-Exp**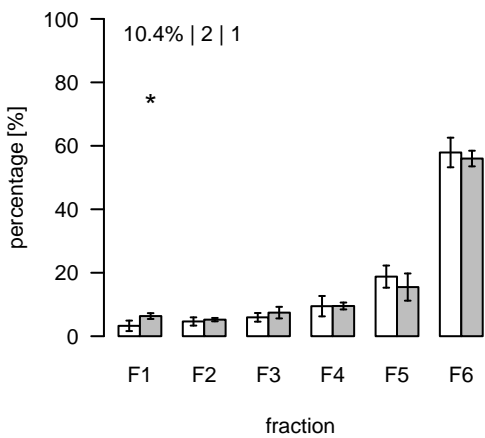**(Unknown)-217.5-Exp**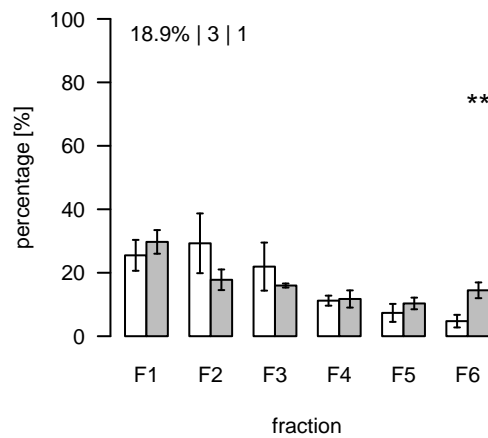**(Unknown)-231.5-Exp**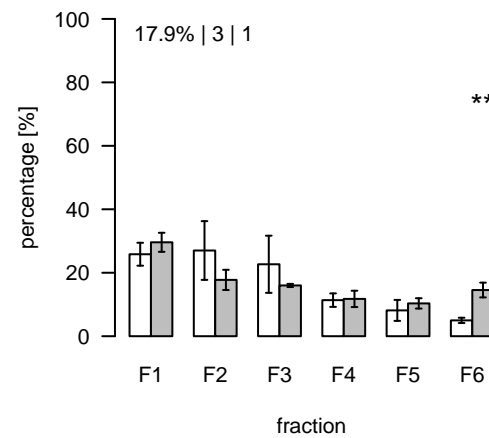**(Unknown)-234.5-Exp**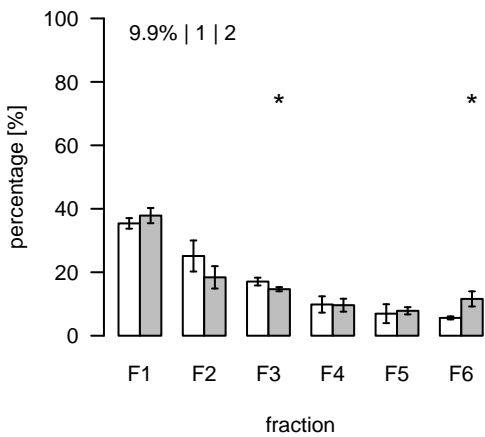**(Unknown)-236.8-Exp**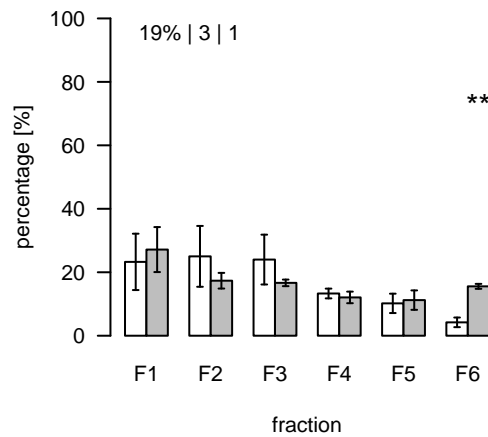**(Unknown)-245.9-Exp**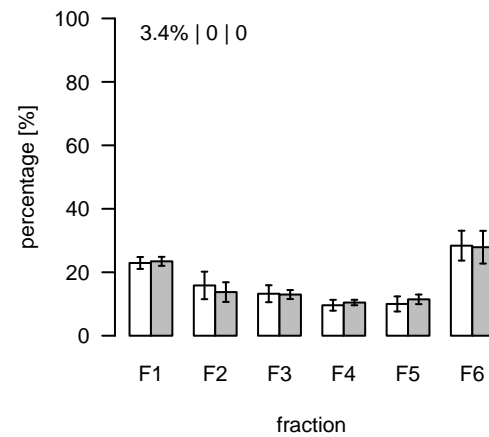

**(Unknown)-274.9-Exp**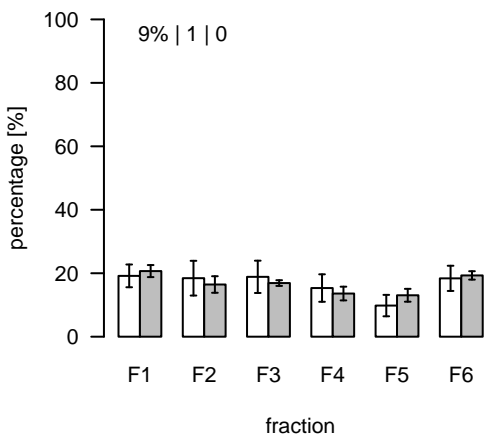**(Unknown)-353.8-Exp**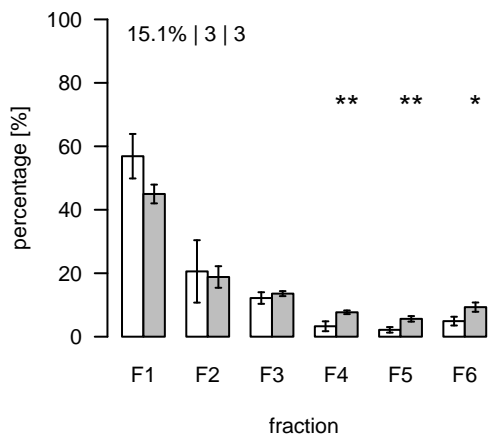**(Unknown)-361.8-Exp**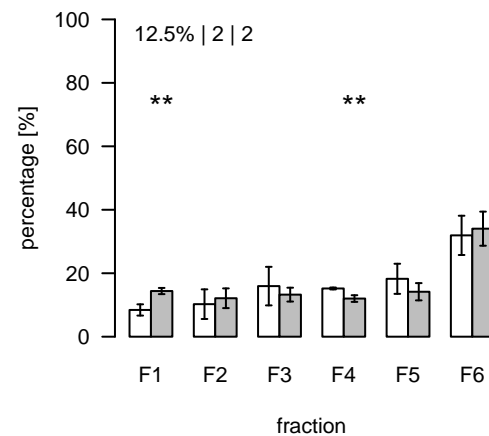**(Unknown)-368.9-Exp**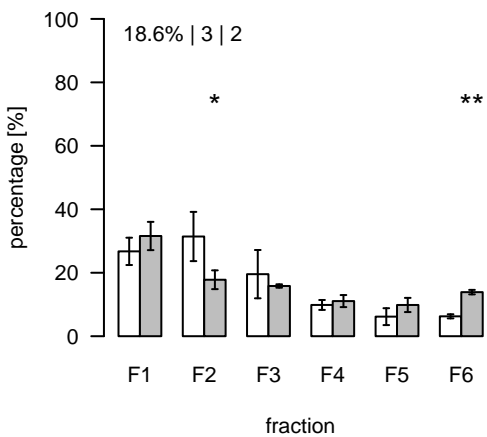**(Unknown)-375.6-Exp**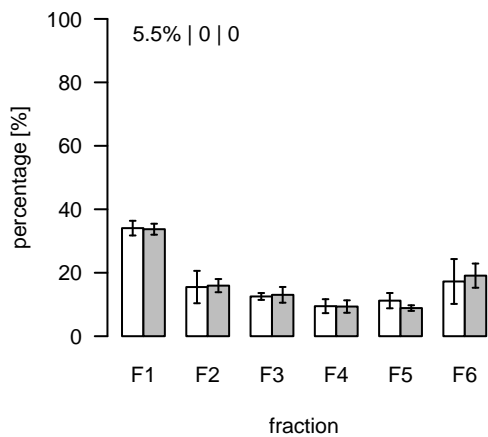**(Unknown)-389.0-Exp**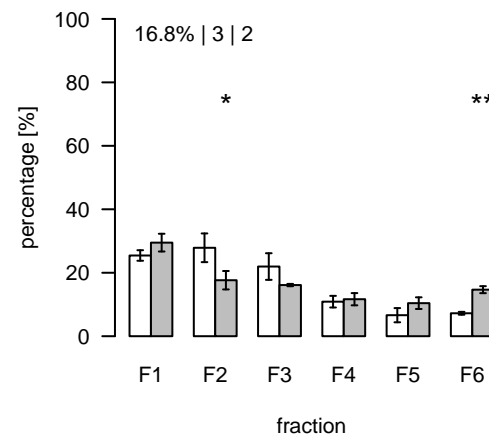**(Unknown)-396.4-Exp**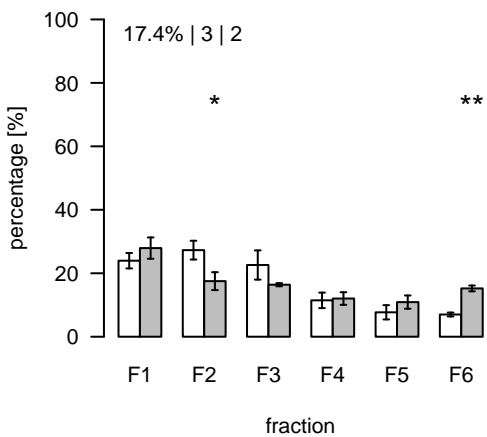**(Unknown)-401.7-Exp**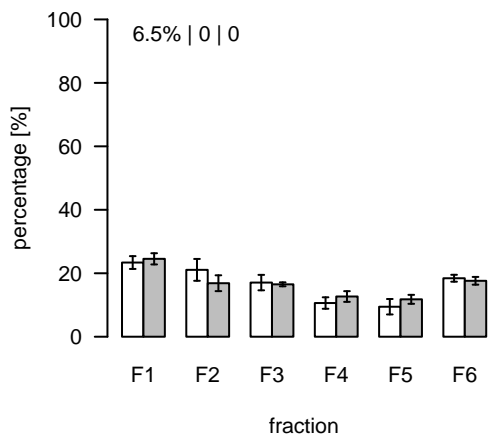**(Unknown)-428.5-Exp**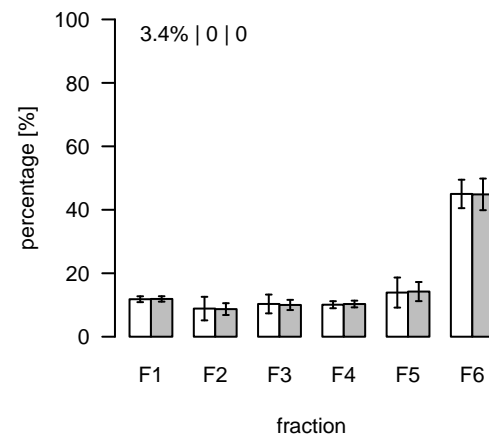

**(Unknown)-431.7-Exp**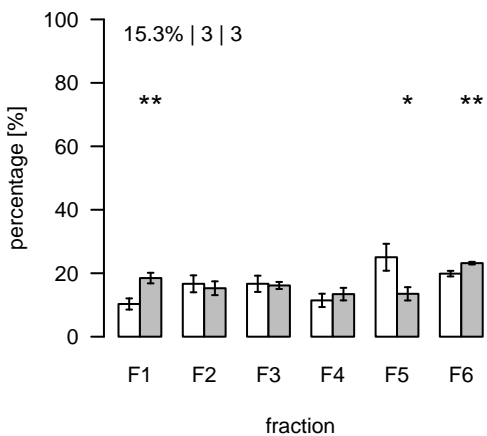**(Unknown)-452.3-Exp**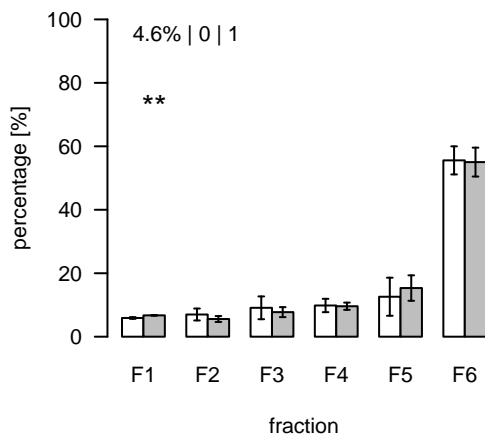**(Unknown)-560.9-Exp**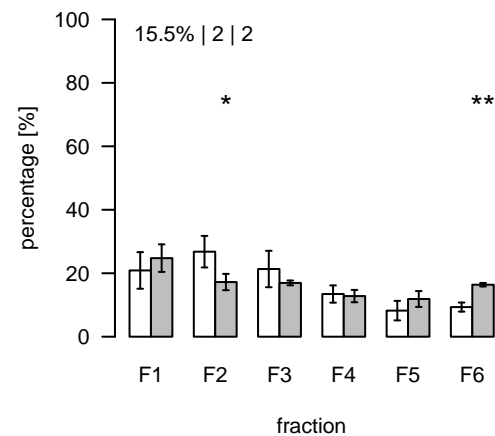**(Unknown)-605.8-Exp**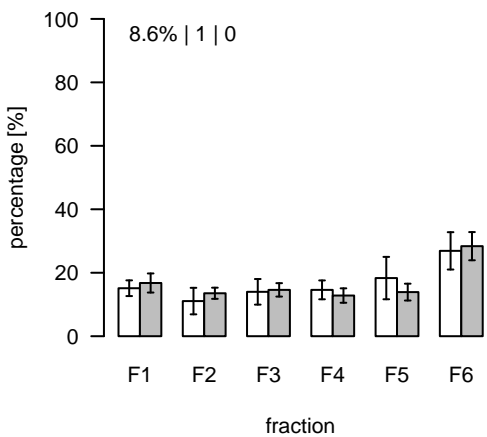**(Unknown)-608.3-Exp**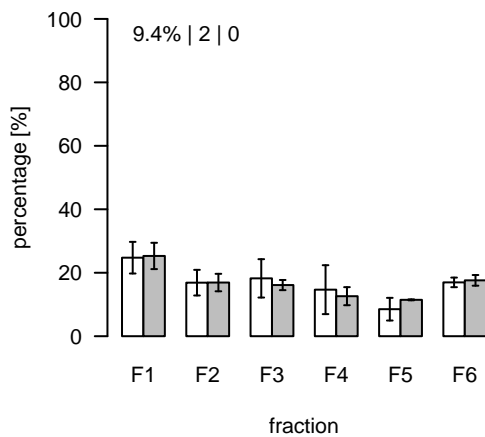**(Unknown)-618.8-Exp**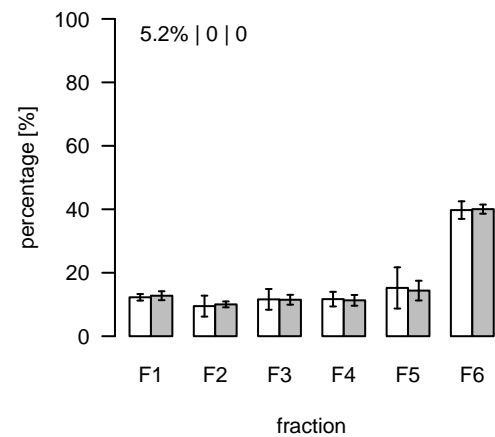**(Unknown)-627.1-Exp**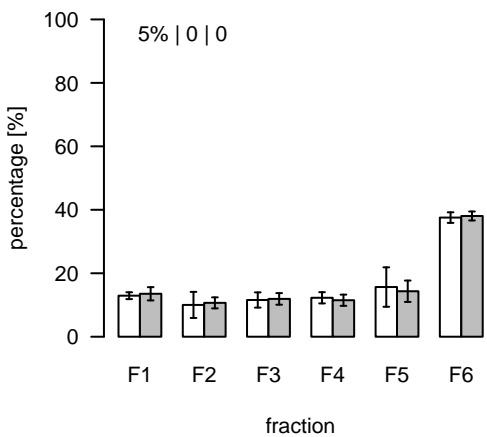**(Unknown)-731.5-Exp**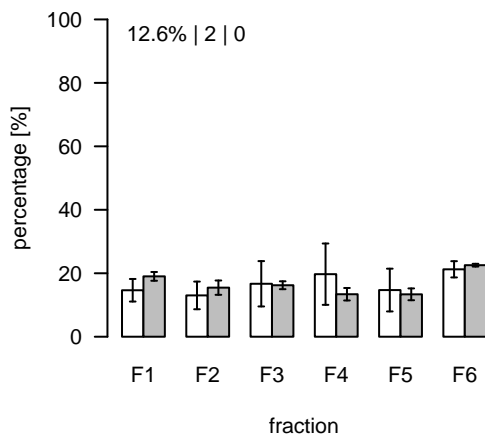**(Unknown)-738.0-Exp**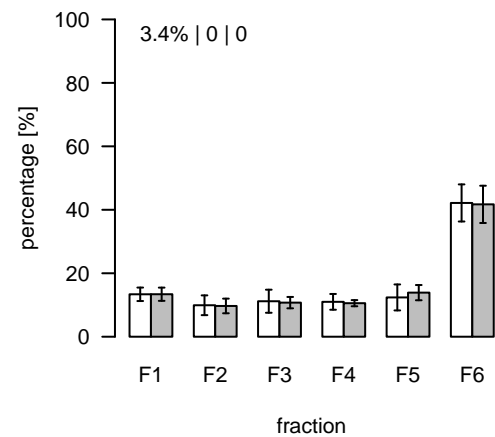

**(Unknown)-752.3-Exp**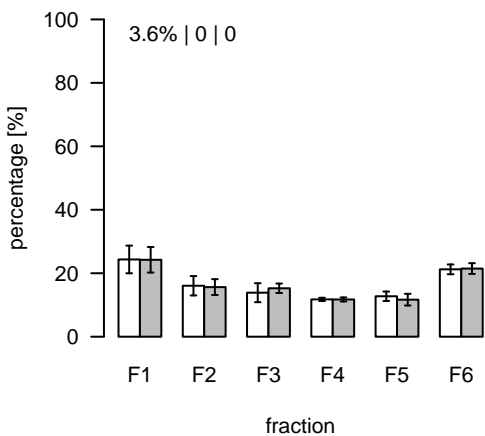**(Unknown)-768.9-Exp**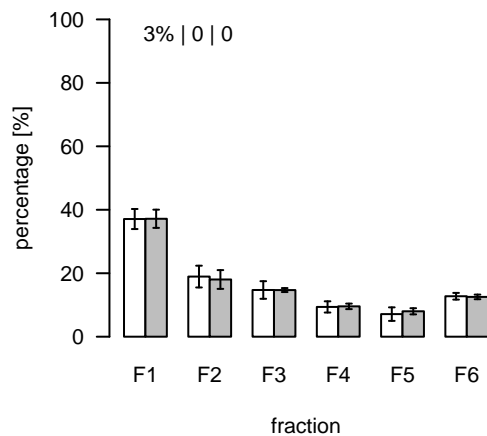**(Unknown)-983.6-Exp**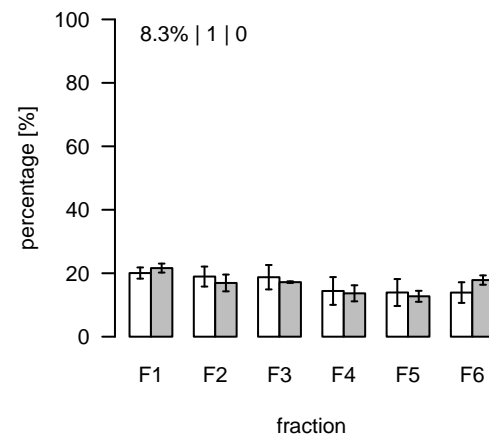**(Unknown)-1005.5-Exp**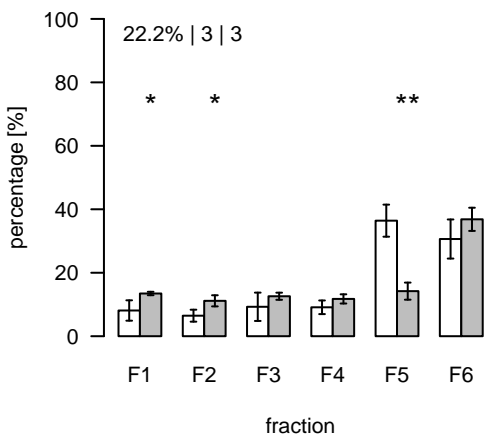**(Unknown)-1134.4-Exp**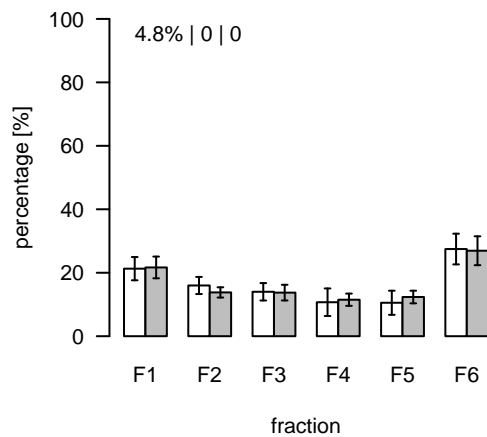**(Unknown)-1172.5-Ath**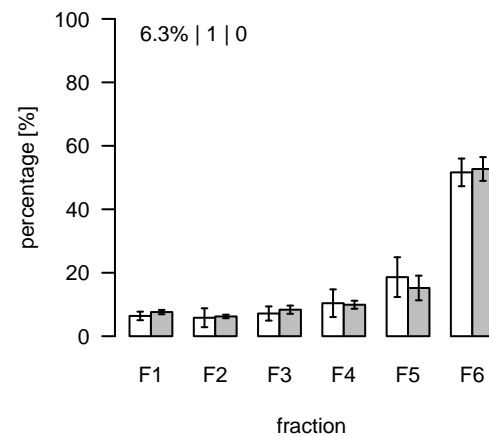**(Unknown)-1200.7-Exp**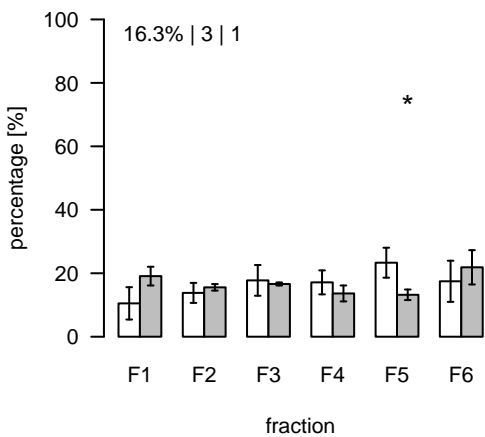**(Unknown)-273.1-Ath**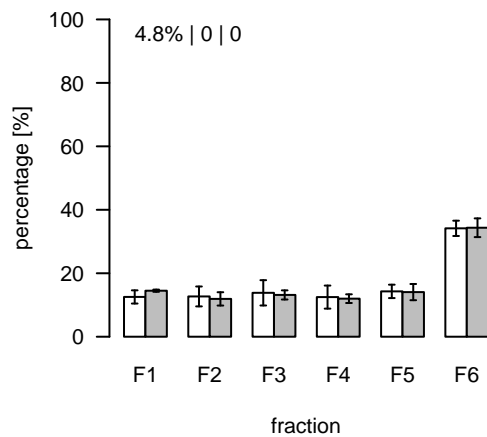**(Unknown)-287.8-Ath**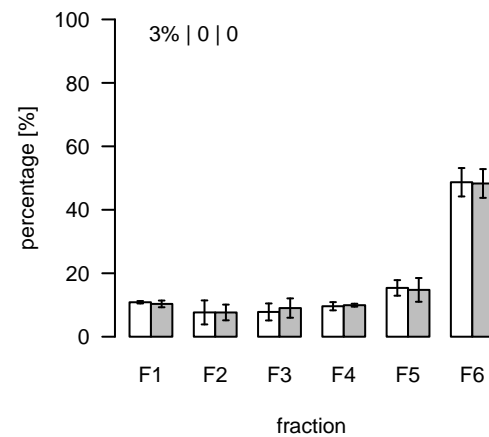

**(Unknown)-304.0-Ath**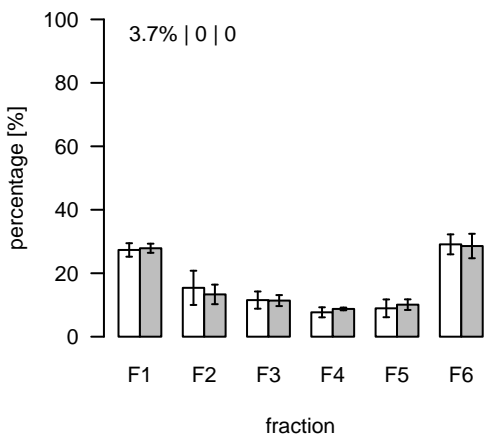**(Unknown)-309.4-Ath**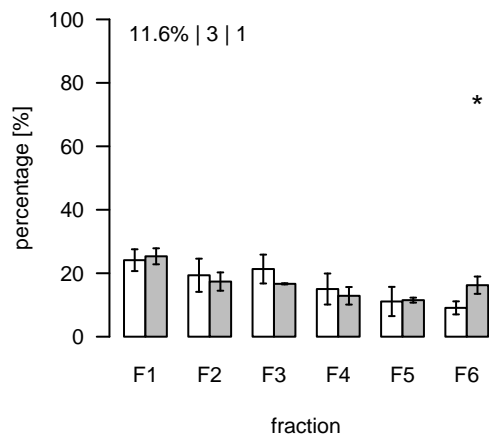**(Unknown)-316.9-Ath**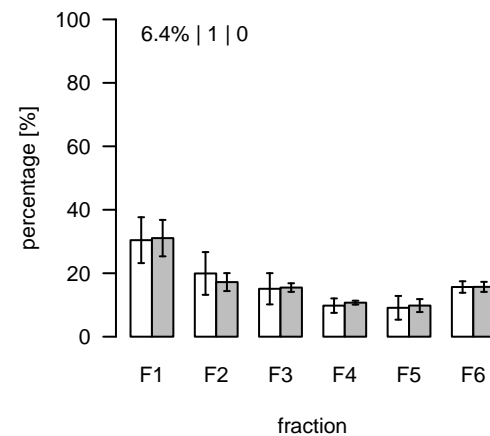**(Unknown)-321.1-Ath**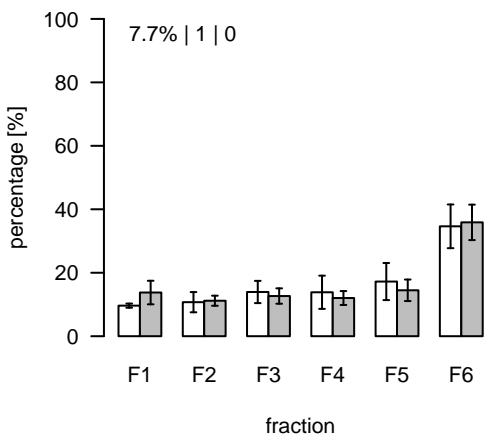**(Unknown)-346.5-Ath**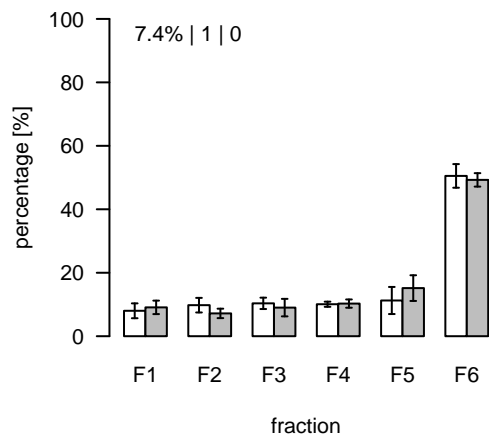**(Unknown)-348.8-Ath**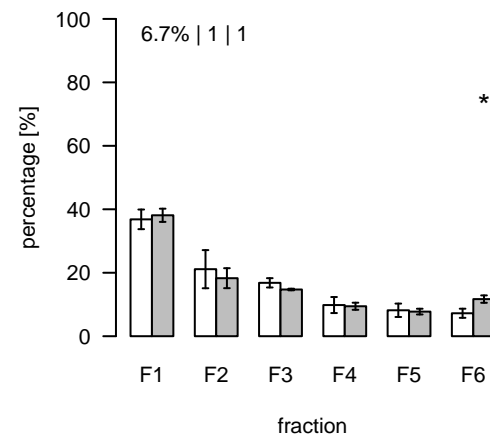**(Unknown)-355.0-Ath**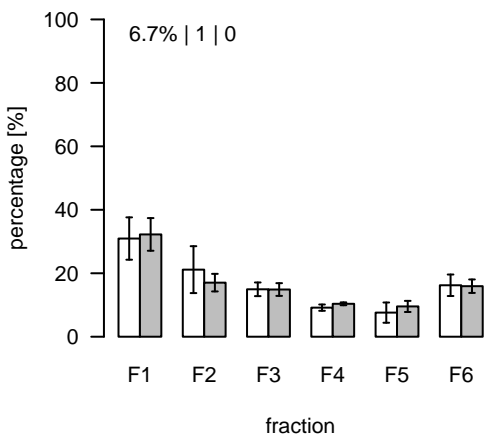**(Unknown)-376.0-Ath**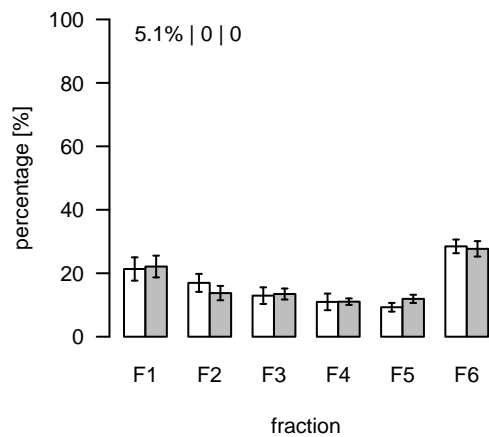**(Unknown)-401.2-Ath**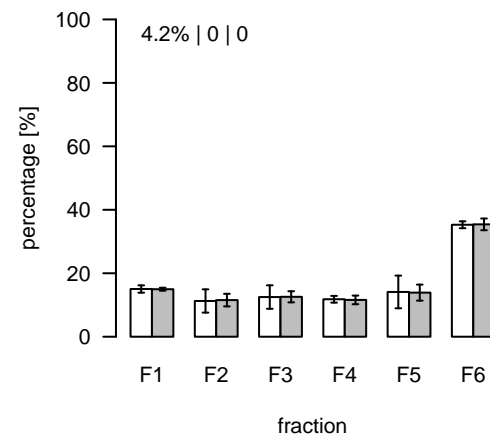

**(Unknown)-412.8-Ath**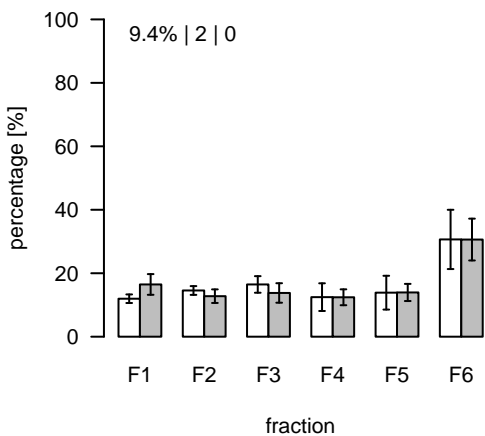**(Unknown)-418.2-Ath**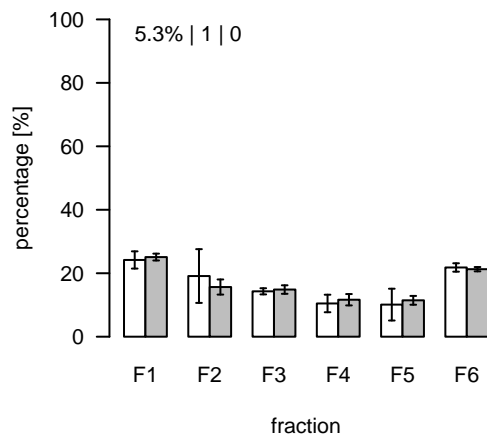**(Unknown)-419.1-Ath**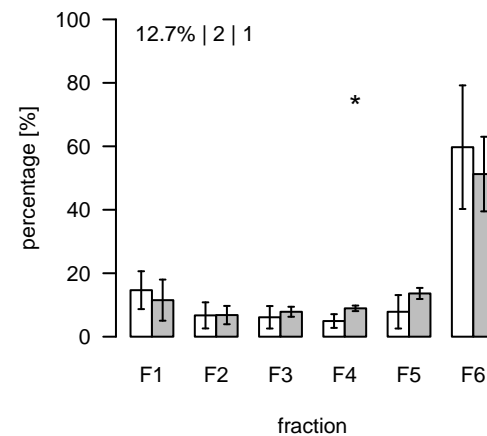**(Unknown)-426.5-Ath**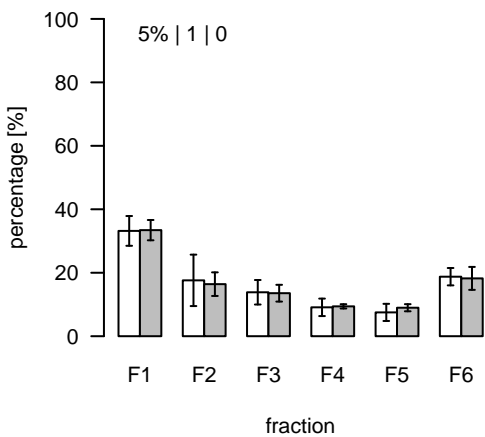**(Unknown)-426.6-Ath**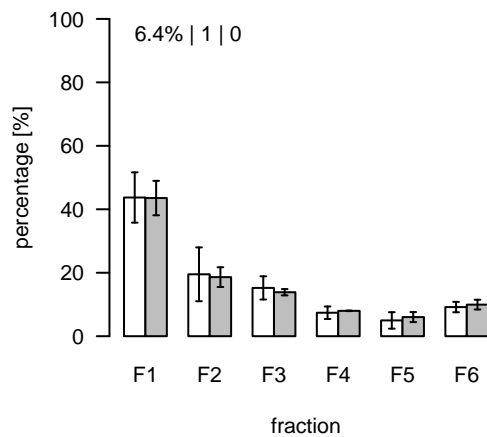**(Unknown)-434.7-Ath**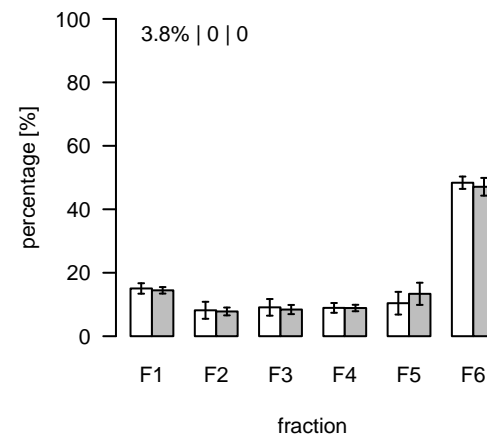**(Unknown)-435.1-Ath**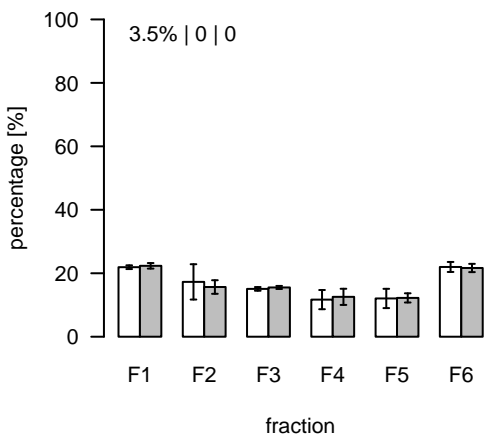**(Unknown)-438.8-Ath**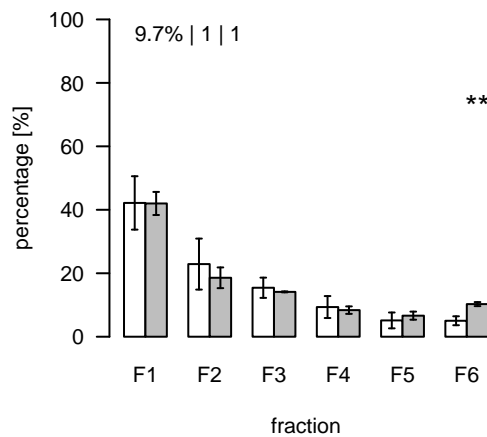**(Unknown)-443.2-Ath**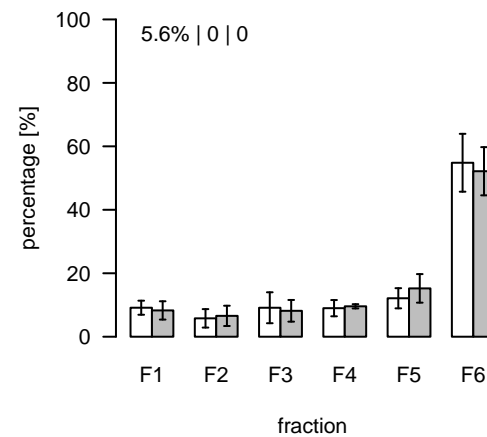



**(Unknown)-448.8-Ath**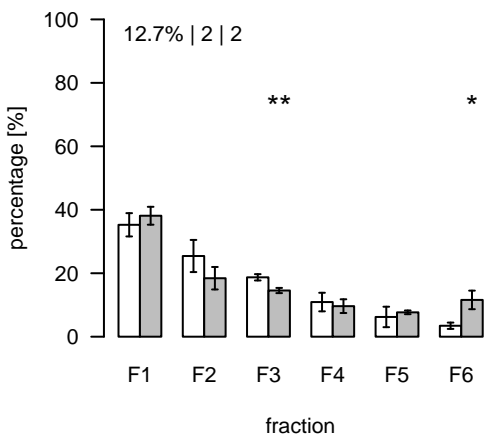**(Unknown)-449.4-Ath**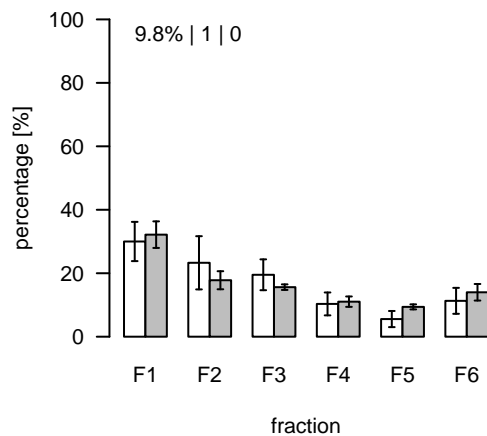**(Unknown)-454.1-Ath**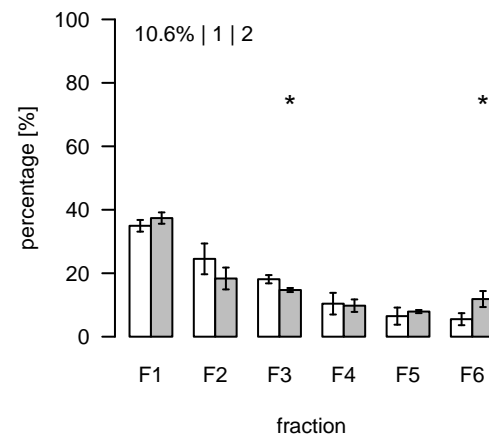**(Unknown)-459.1-Ath**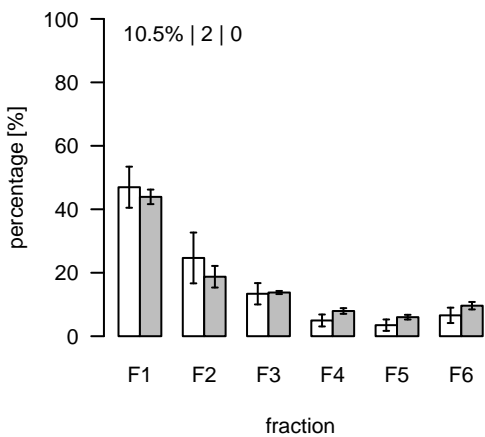**(Unknown)-463.6-Ath**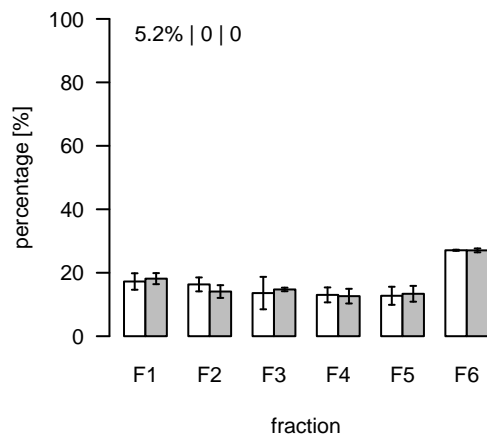**(Unknown)-465.9-Ath**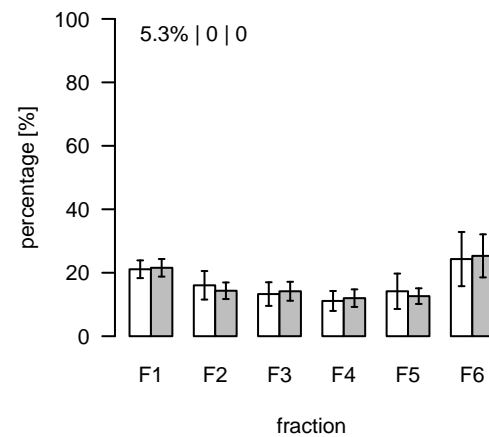**(Unknown)-468.7-Ath**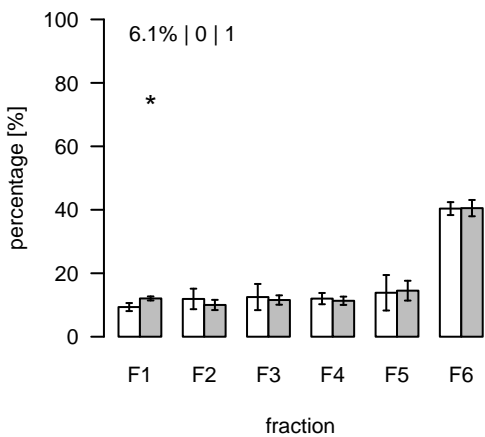**(Unknown)-471.0-Ath**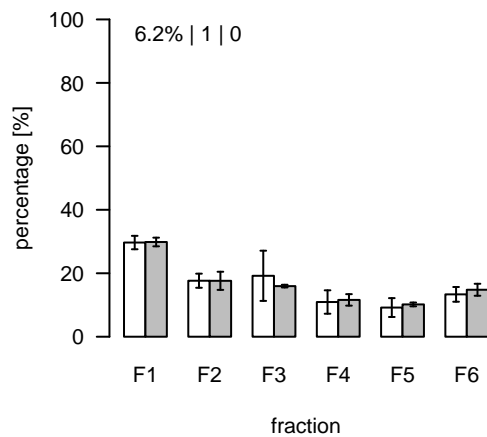**(Unknown)-484.4-Ath**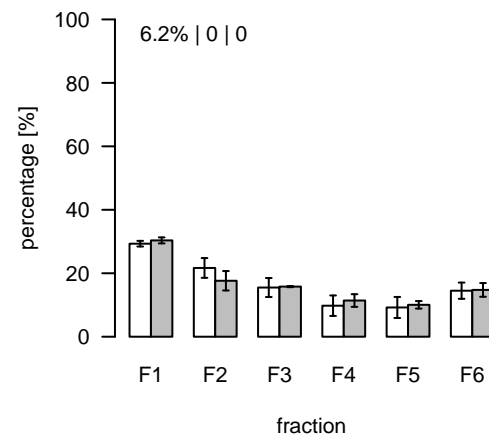

**(Unknown)-492.6-Ath**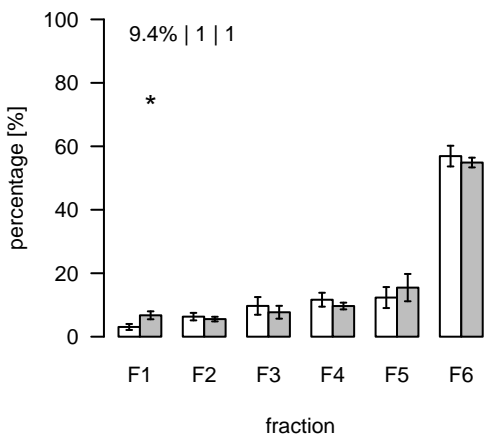**(Unknown)-494.1-Ath**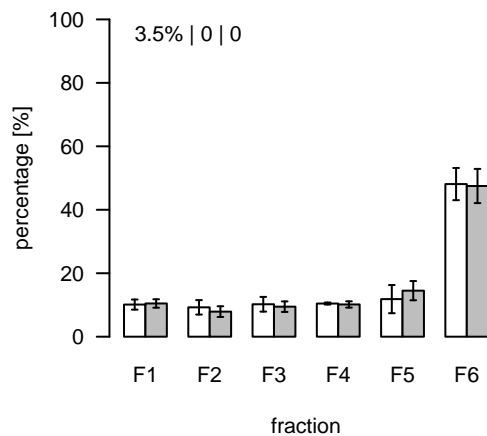**(Unknown)-495.8-Ath**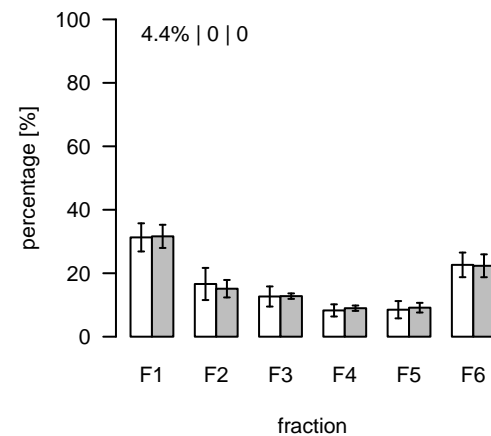**(Unknown)-510.9-Ath**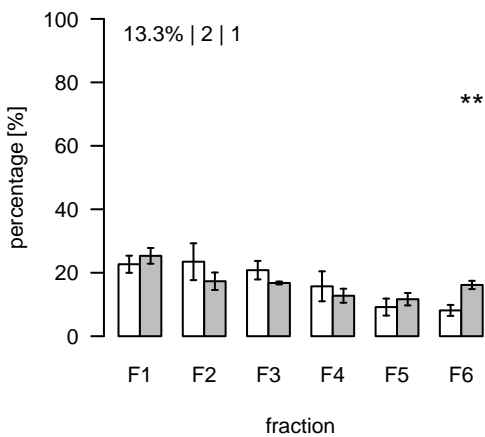**(Unknown)-521.3-Ath**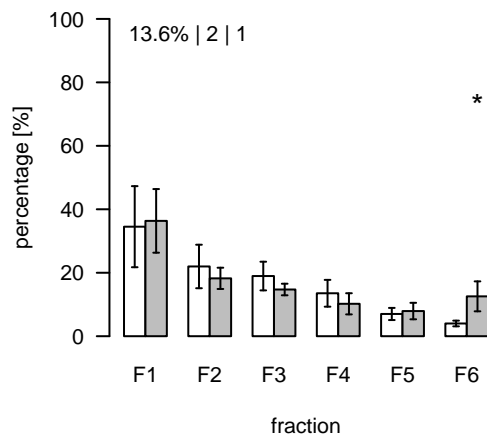**(Unknown)-525.7-Ath**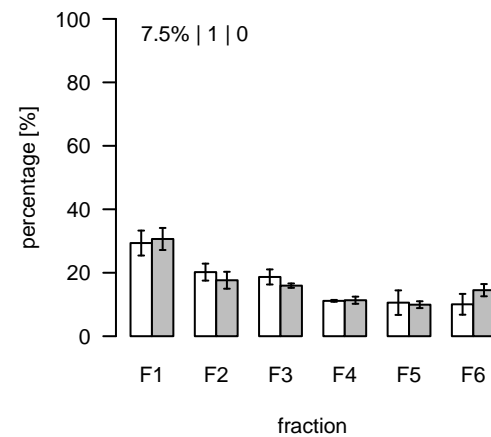**(Unknown)-531.5-Ath**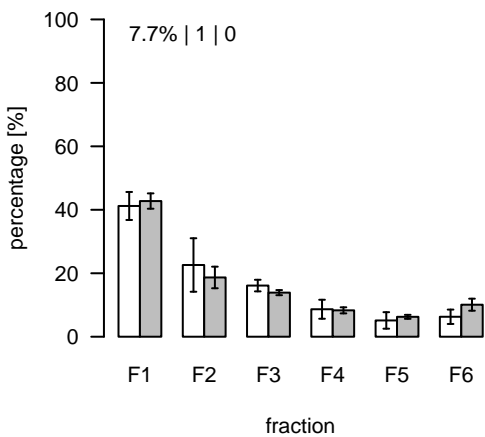**(Unknown)-534.5-Ath**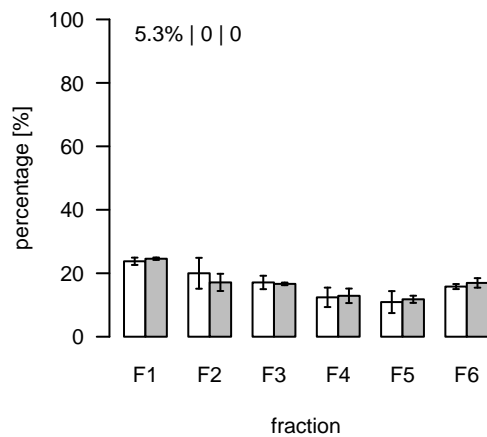**(Unknown)-534.1-Ath**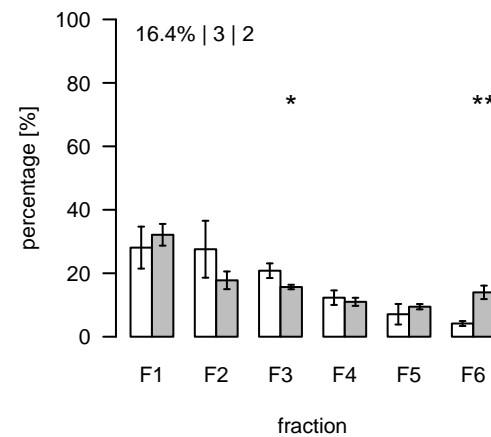

**(Unknown)-557.4-Ath**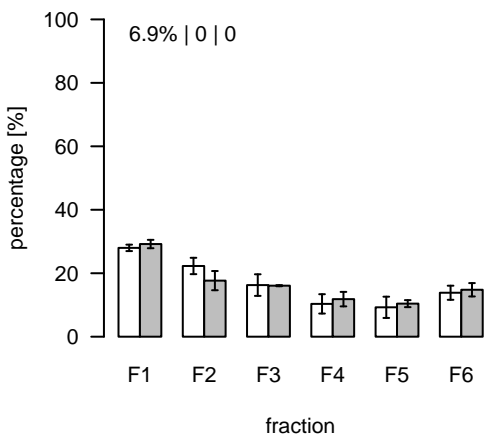**(Unknown)-562.5-Ath**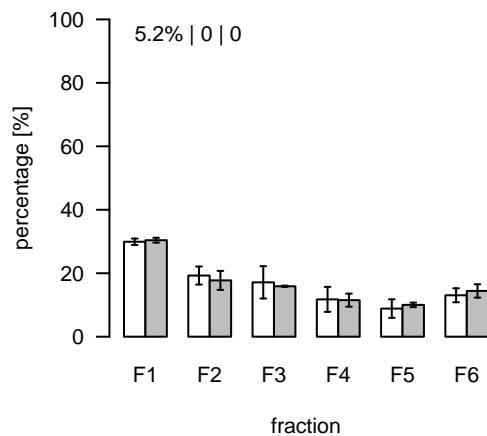**(Unknown)-571.3-Ath**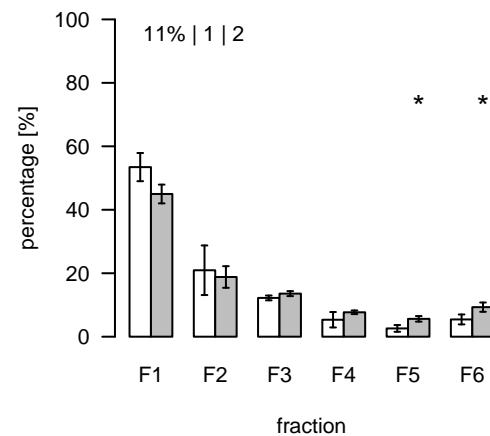**(Unknown)-577.3-Ath**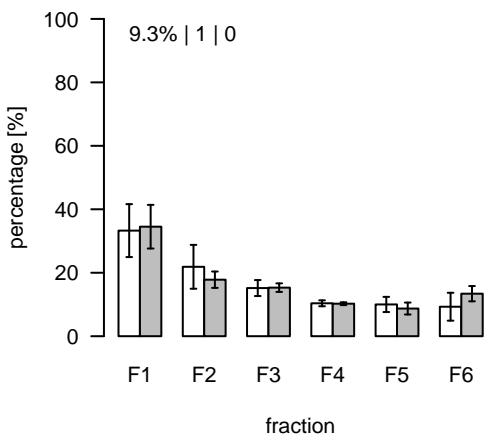**(Unknown)-616.2-Ath**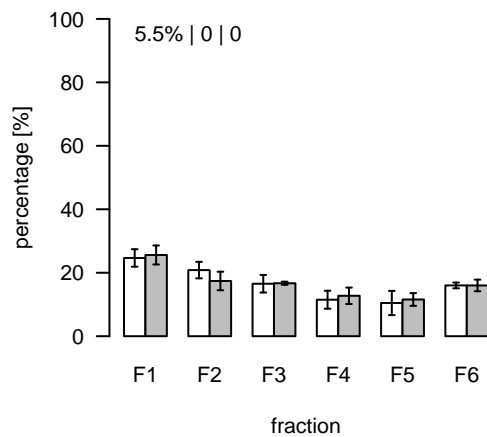**(Unknown)-621.6-Ath**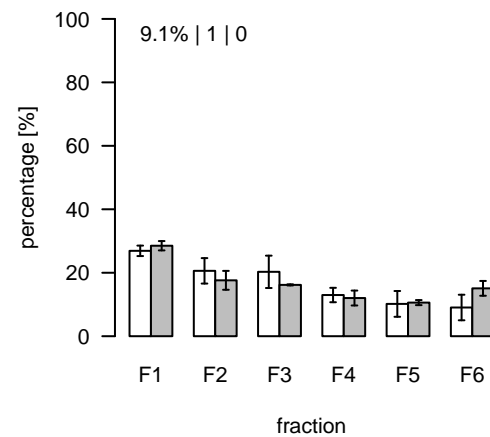**(Unknown)-630.2-Ath**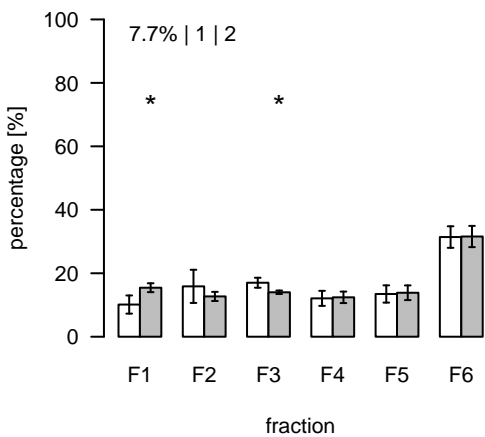**(Unknown)-636.7-Ath**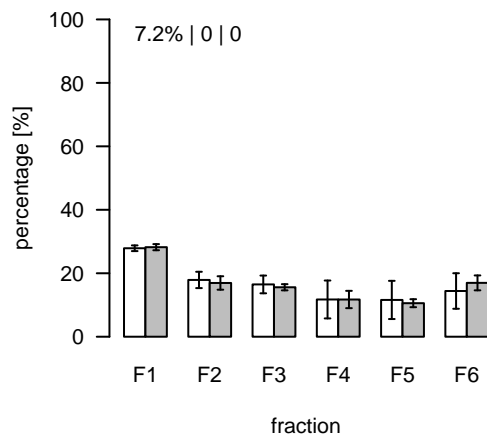**(Unknown)-640.9-Ath**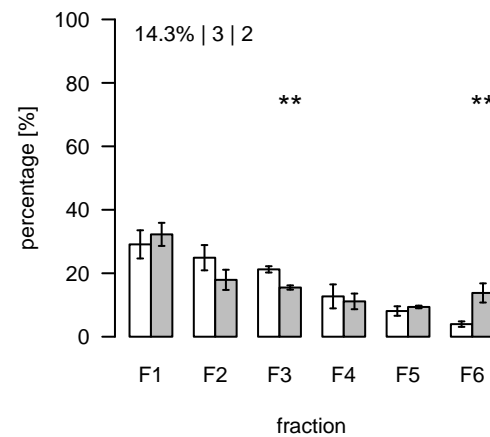

**(Unknown)-661.6-Ath**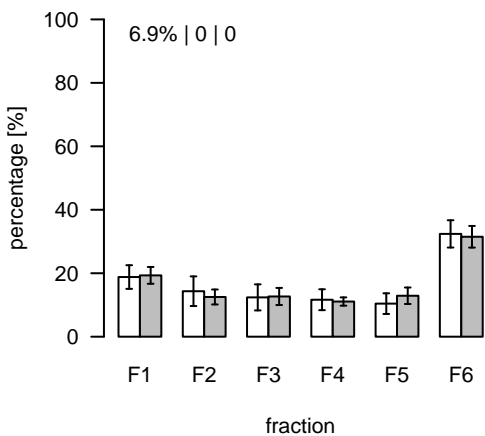**(Unknown)-664.0-Ath**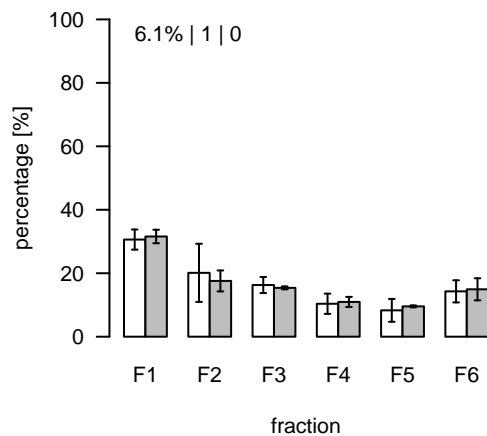**(Unknown)-685.0-Ath**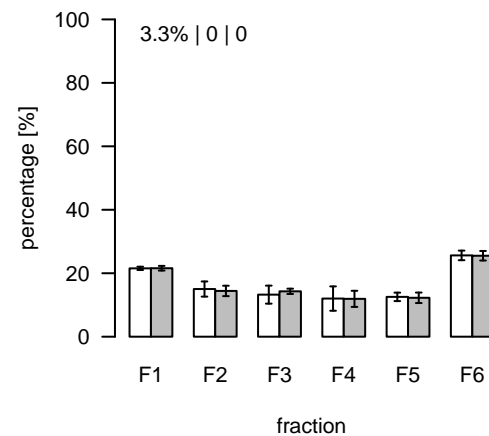**(Unknown)-706.4-Ath**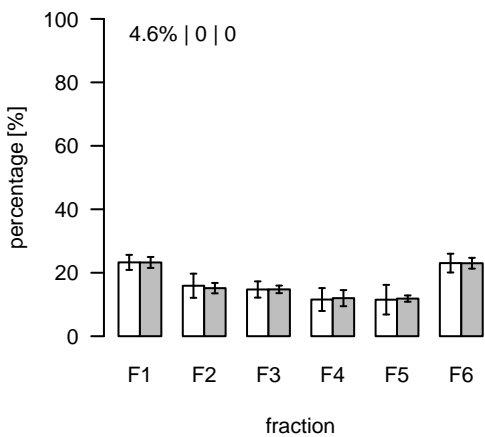**(Unknown)-715.2-Ath**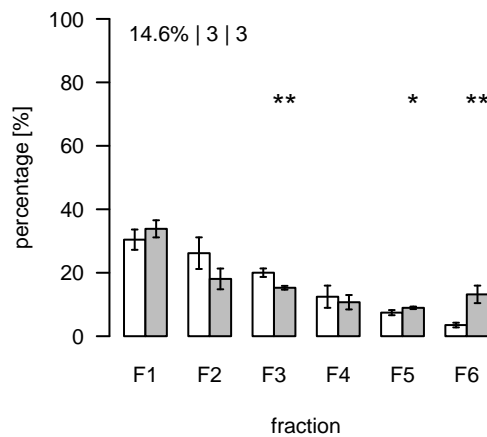**(Unknown)-717.7-Ath**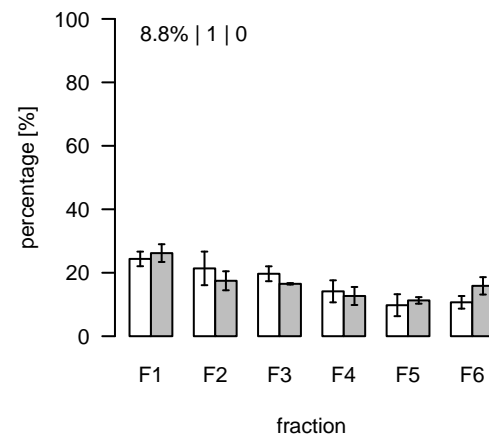**(Unknown)-718.3-Ath**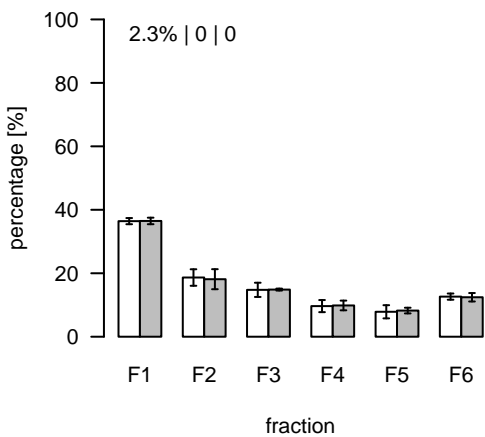**(Unknown)-720.9-Ath**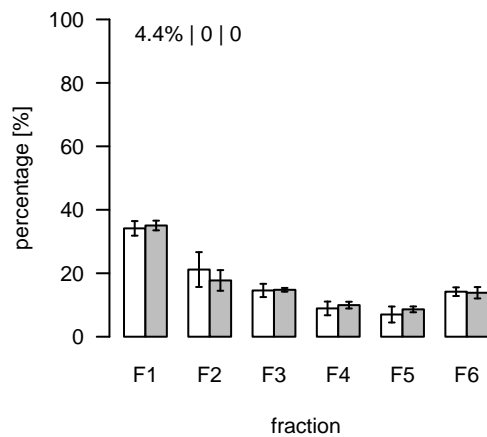**(Unknown)-749.4-Ath**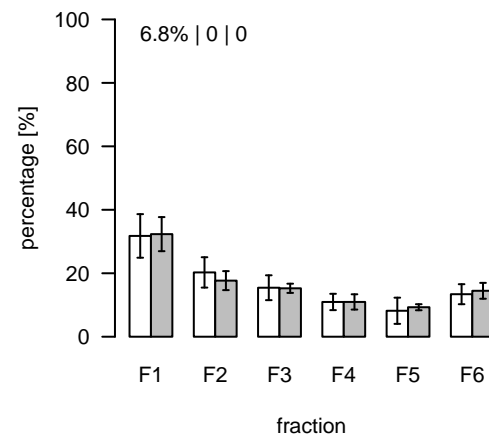

**(Unknown)-753.4-Ath**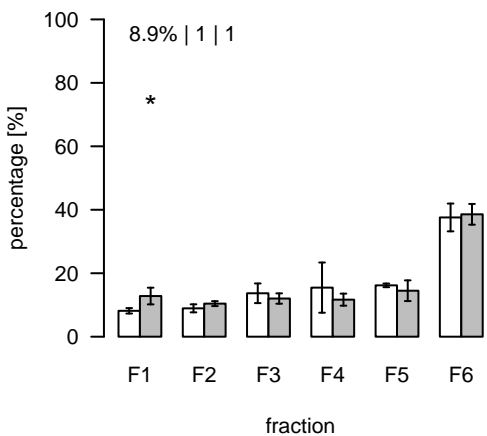**(Unknown)-773.6-Ath**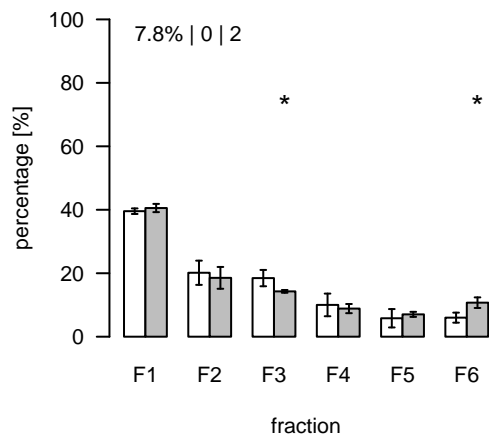**(Unknown)-776.7-Ath**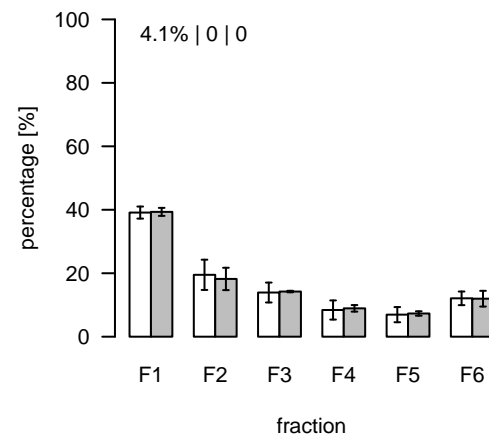**(Unknown)-778.7-Ath**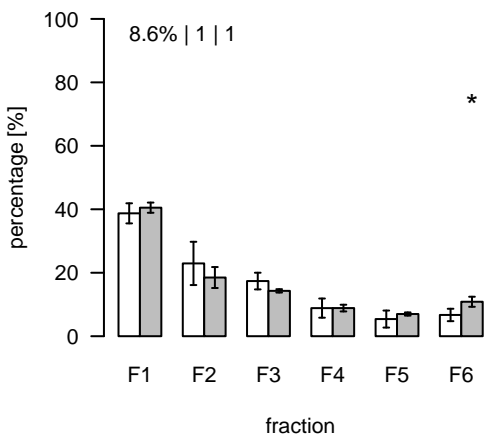**(Unknown)-785.3-Ath**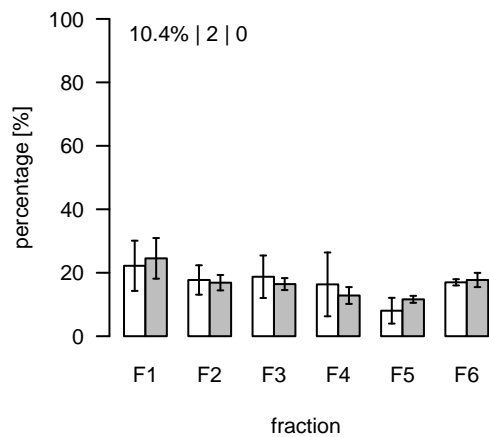**(Unknown)-802.6-Ath**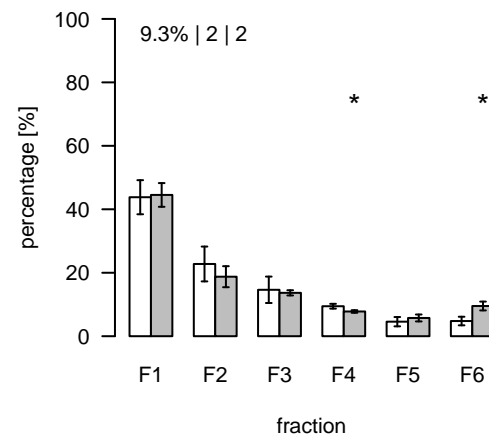**(Unknown)-807.2-Ath**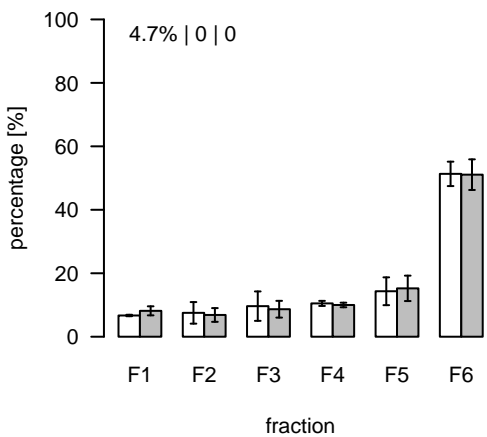**(Unknown)-806.2-Ath**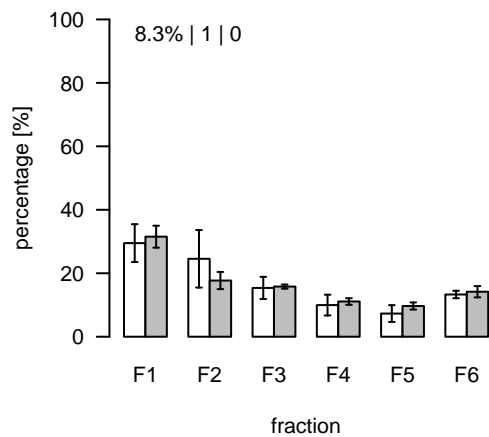**(Unknown)-822.2-Ath**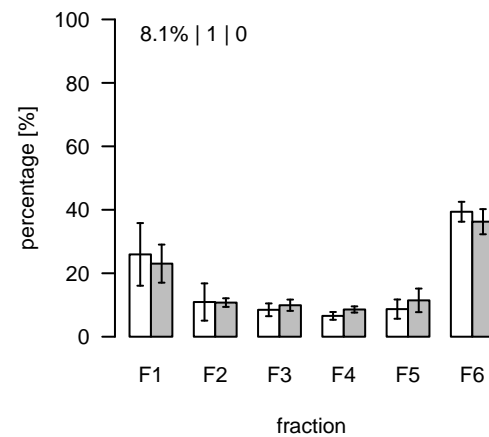

**(Unknown)-830.0-Ath**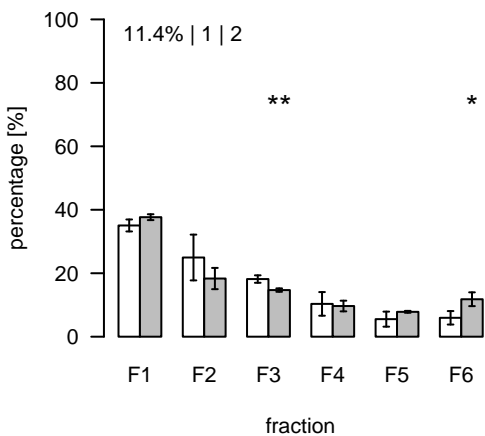**(Unknown)-865.3-Ath**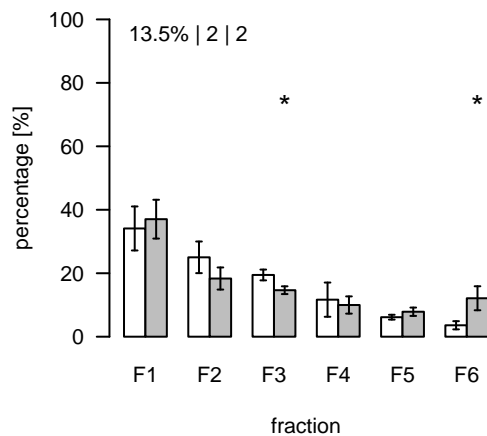**(Unknown)-867.2-Ath**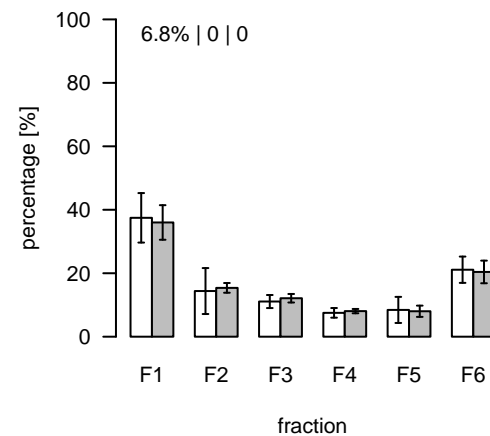**(Unknown)-899.4-Ath**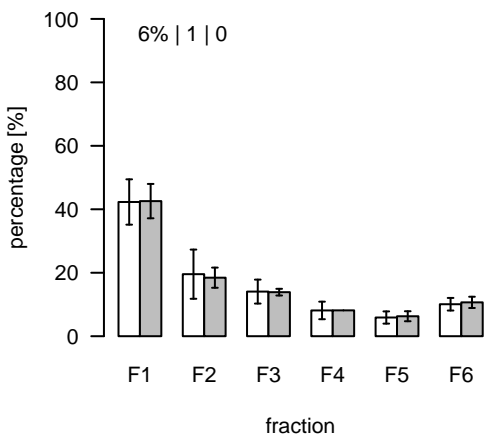**(Unknown)-906.8-Ath**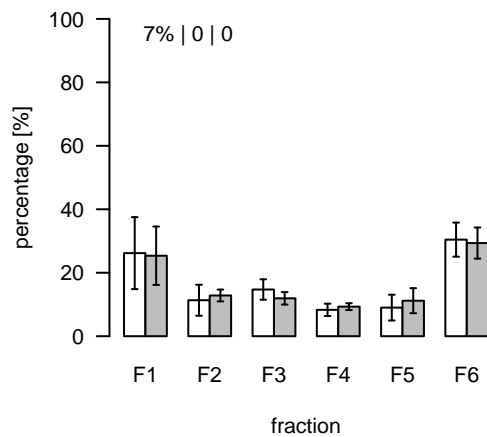**(Unknown)-947.4-Ath**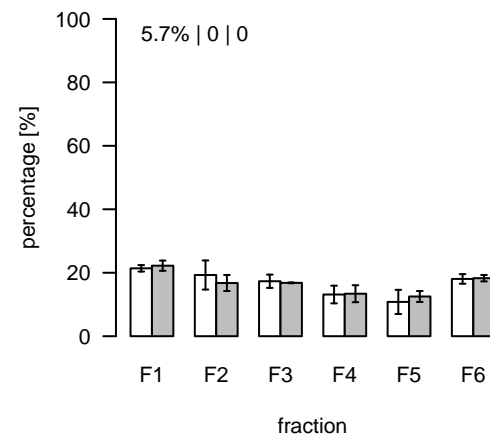**(Unknown)-998.6-Ath**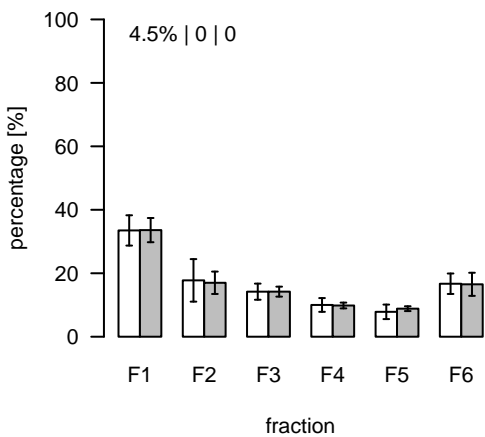**(Unknown)-1045.6-Ath**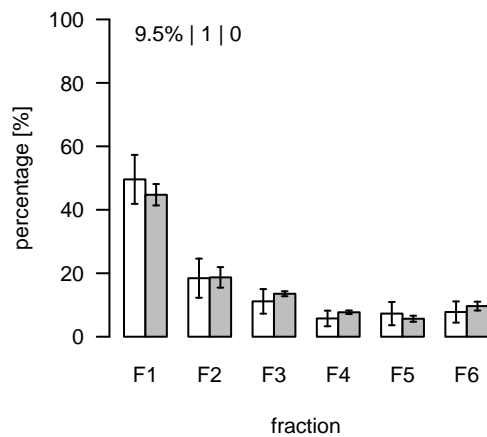**(Unknown)-1052.5-Ath**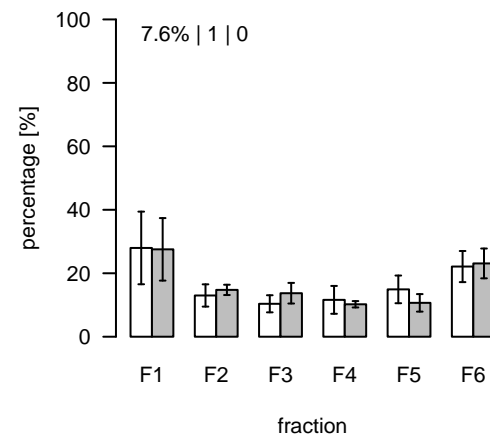

**(Unknown)-1095.6-Ath**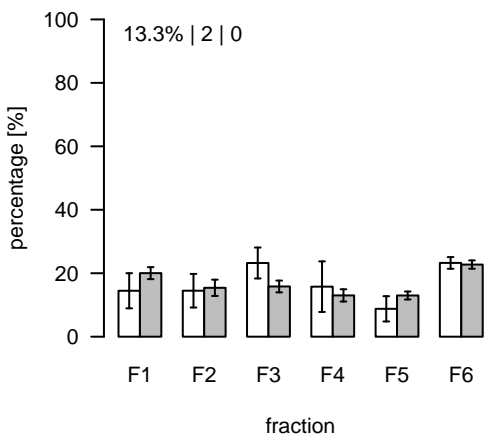**(Unknown)-1127.7-Ath**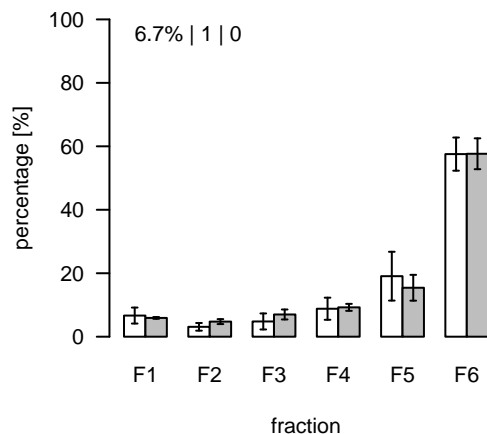**(Unknown)-1137.8-Ath**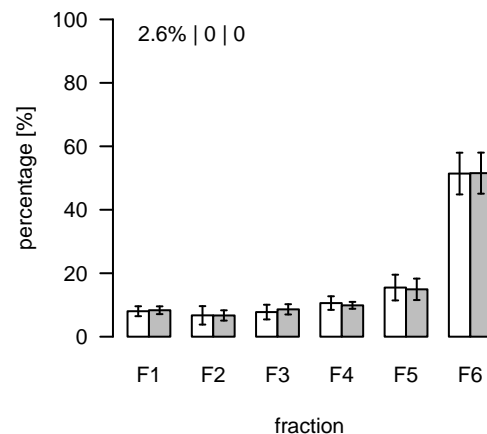**(Unknown)-1182.6-Ath**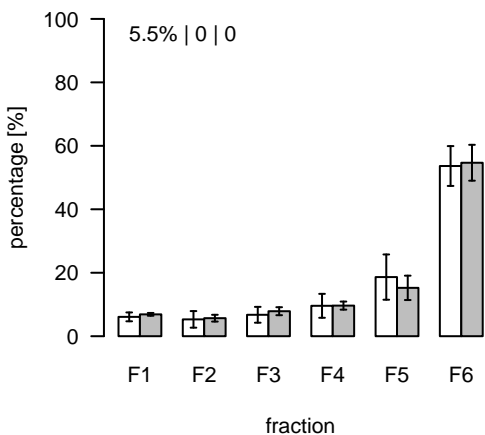**(Unknown)-1186.0-Ath**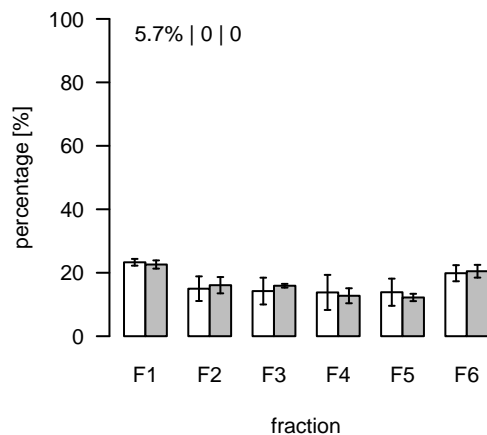**L5 (m/z=432.239799; rt=1.36442)  
T/S Cluster: L-1.4-1**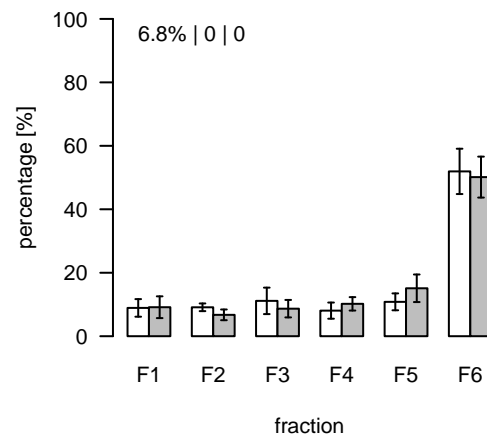**L6 (m/z=432.232293; rt=1.36462)  
T/S Cluster: L-1.4-1**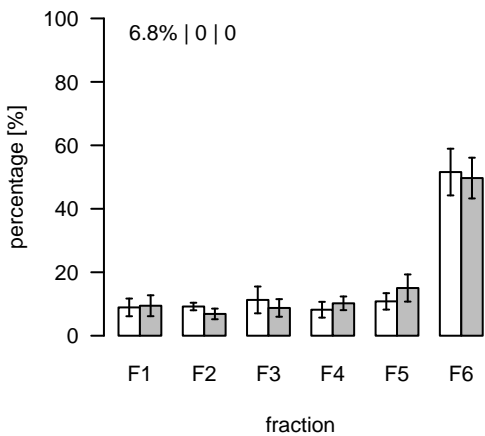**L2 (m/z=433.238775; rt=1.36419)  
T/S Cluster: L-1.4-1**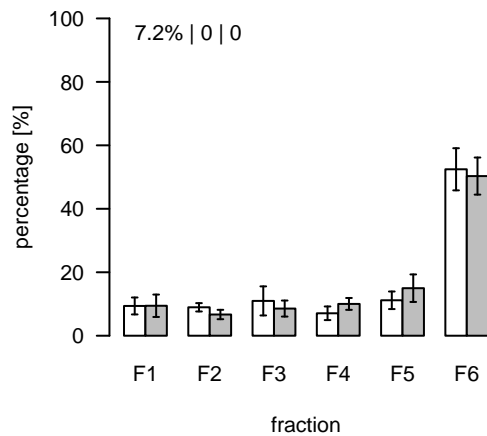**L3 (m/z=415.213114; rt=1.36432)  
T/S Cluster: L-1.4-1**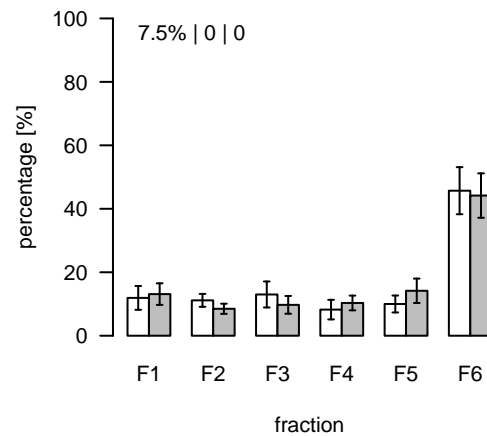

**L4 (m/z=415.209739; rt=1.36442)**  
T/S Cluster: L-1.4-1

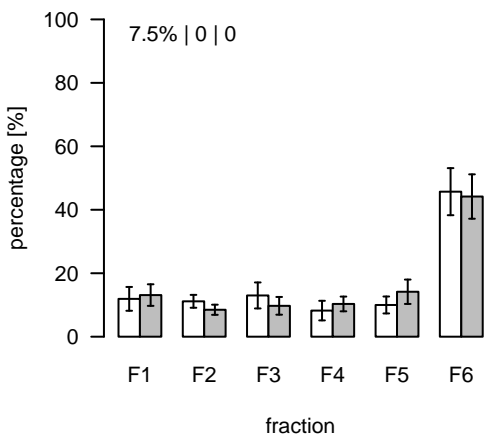

**L1 (m/z=433.244077; rt=1.36412)**  
T/S Cluster: L-1.4-1

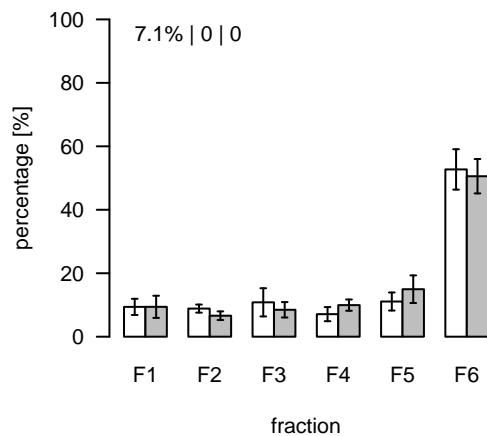

**L10 (m/z=415.212785; rt=1.3724)**  
T/S Cluster: L-1.4-1

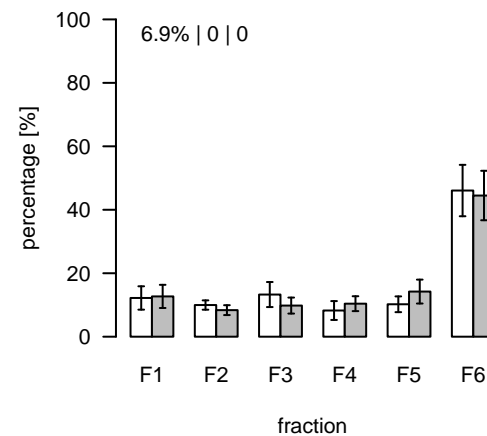

**L8 (m/z=460.27098; rt=1.36859)**  
T/S Cluster: L-1.4-2

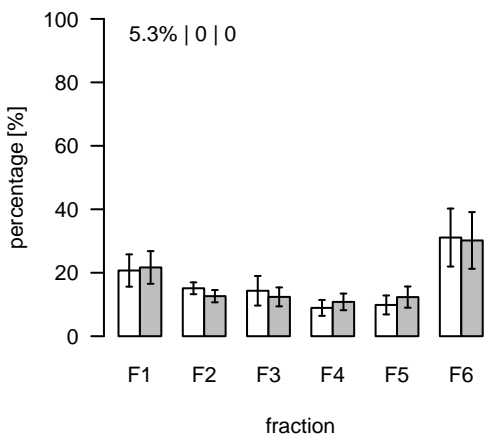

**L9 (m/z=460.26284; rt=1.36879)**  
T/S Cluster: L-1.4-2

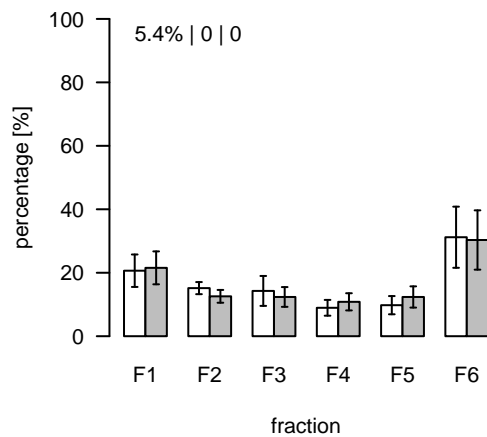

**L7 (m/z=461.2742; rt=1.36848)**  
T/S Cluster: L-1.4-2

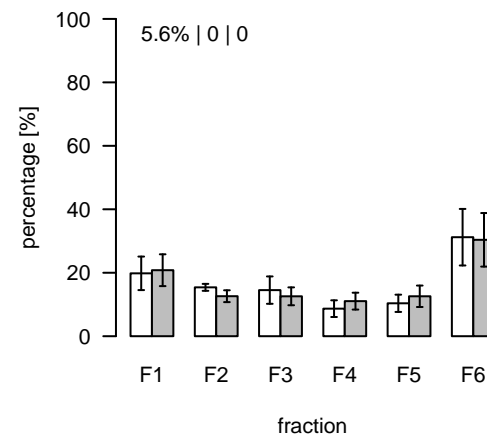

**L11 (m/z=294.20681; rt=1.97812)**  
T/S Cluster: L-2-1

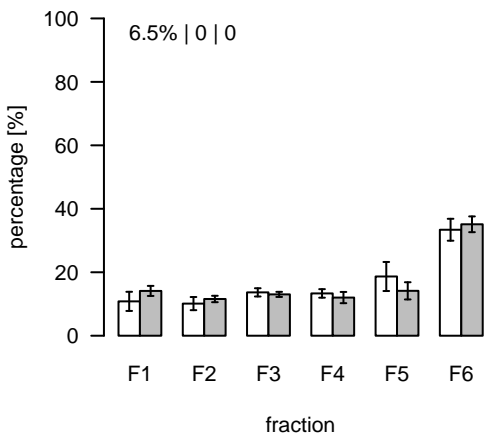

**L15 (m/z=674.41431; rt=2.5047)**  
T/S Cluster: L-2.5-1

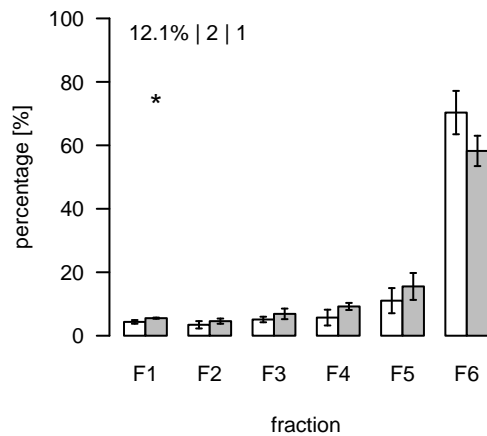

**L13 (m/z=675.418001; rt=2.50431)**  
T/S Cluster: L-2.5-1

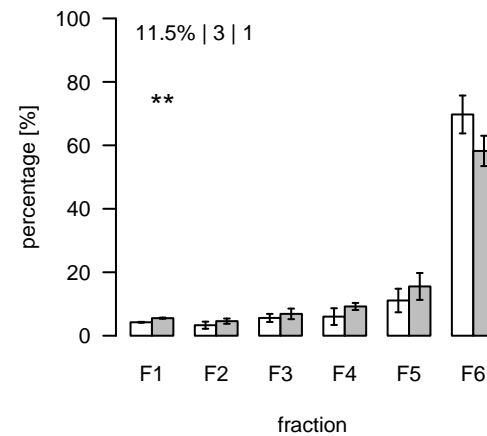



**L14 (m/z=674.38601; rt=2.50455)**  
T/S Cluster: L-2.5-1

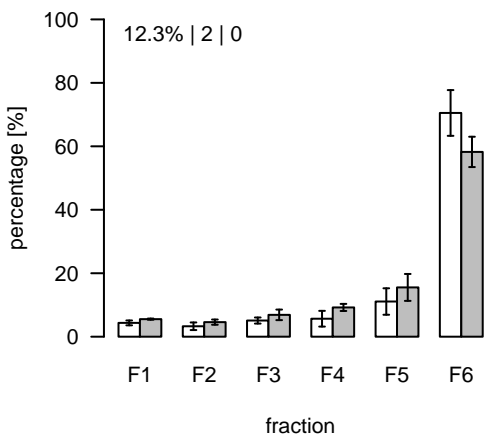

**L12 (m/z=675.401071; rt=2.50425)**  
T/S Cluster: L-2.5-1

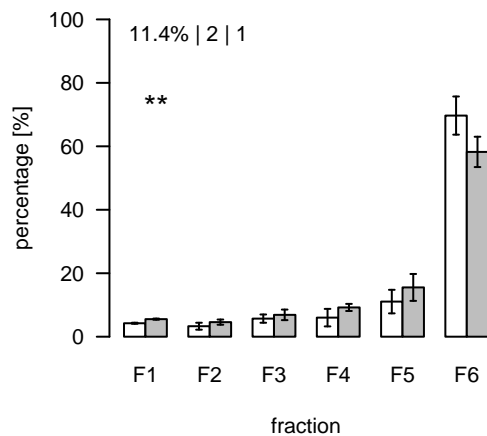

**L16 (m/z=813.522831; rt=2.60859)**  
T/S Cluster: L-2.6-1

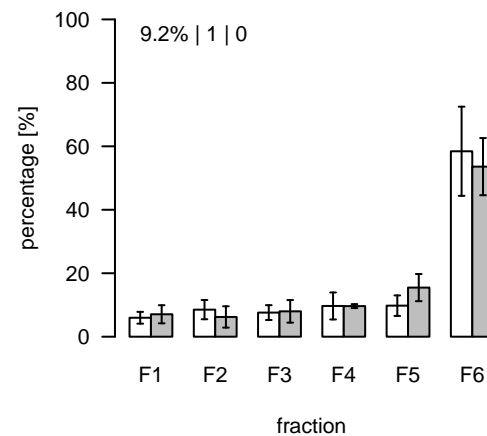

**L17 (m/z=812.519897; rt=2.61006)**  
T/S Cluster: L-2.6-2

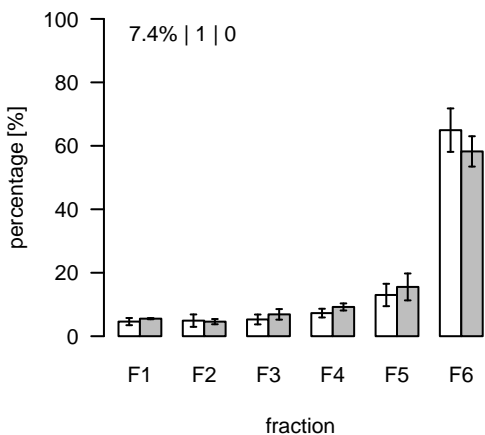

**L19 (m/z=830.507539; rt=2.71645)**  
T/S Cluster: L-2.7-1

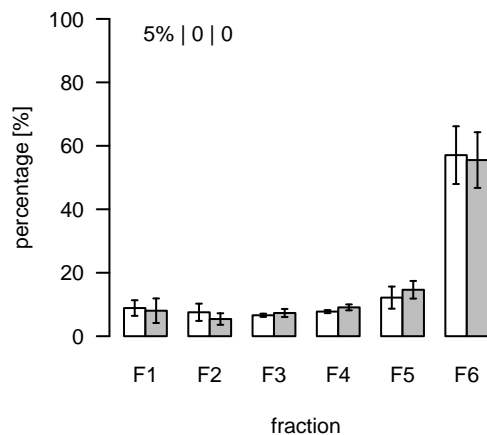

**L18 (m/z=830.53023; rt=2.71631)**  
T/S Cluster: L-2.7-1

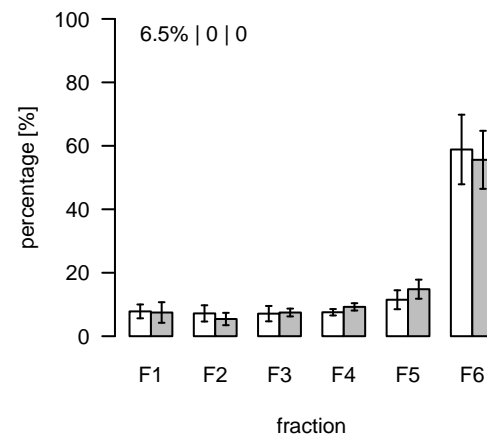

**L20 (m/z=864.49964; rt=2.74845)**  
T/S Cluster: L-2.7-2

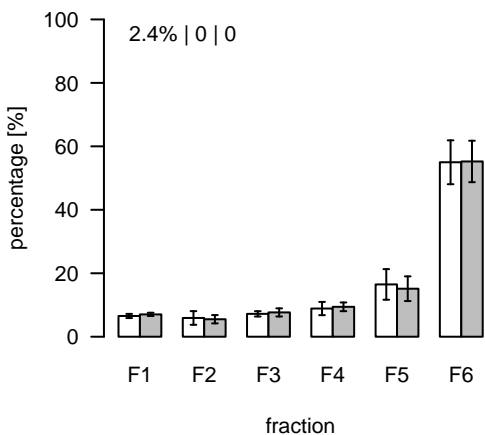

**L21 (m/z=864.502834; rt=2.7485)**  
T/S Cluster: L-2.7-2

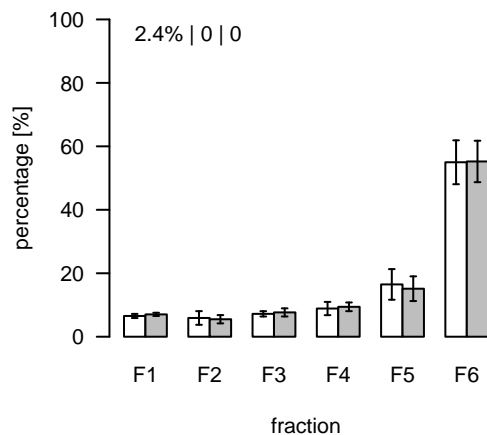

**L22 (m/z=688.425974; rt=2.74915)**  
T/S Cluster: L-2.7-3

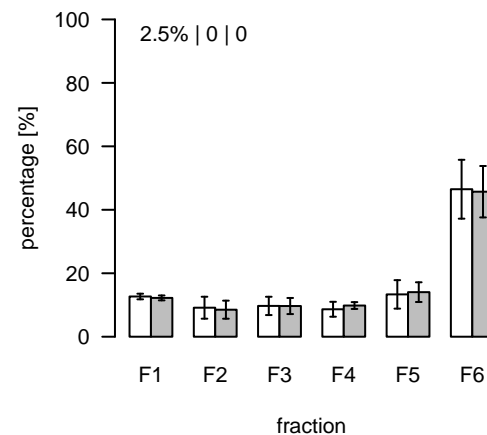

**L24 (m/z=1002.610193; rt=2.84661)**  
T/S Cluster: L-2.8-1

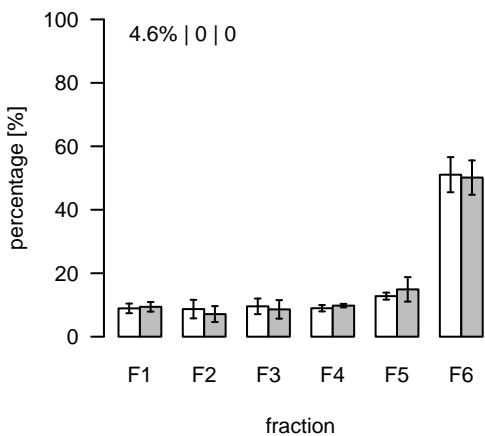

**L23 (m/z=1002.572972; rt=2.84612)**  
T/S Cluster: L-2.8-1

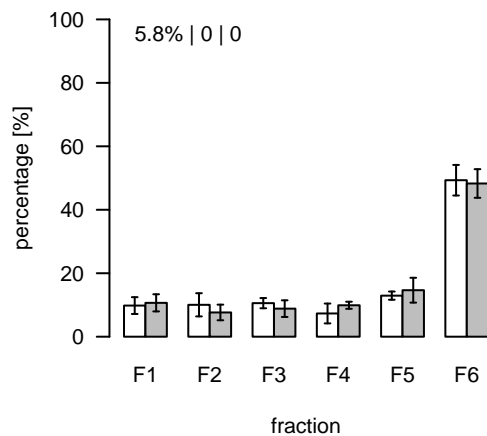

**L28 (m/z=674.414661; rt=2.8716)**  
T/S Cluster: L-2.9-1

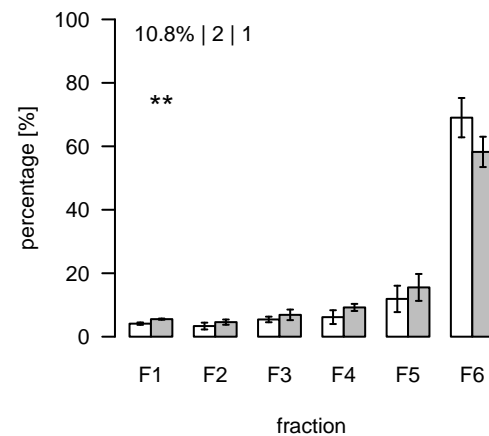

**L29 (m/z=674.413565; rt=2.90488)**  
T/S Cluster: L-2.9-1

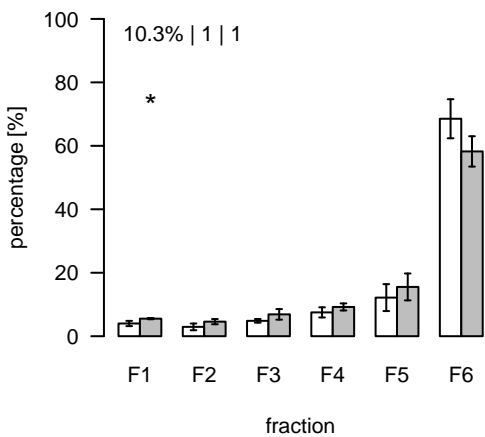

**L31 (m/z=812.519841; rt=2.94205)**  
T/S Cluster: L-2.9-1

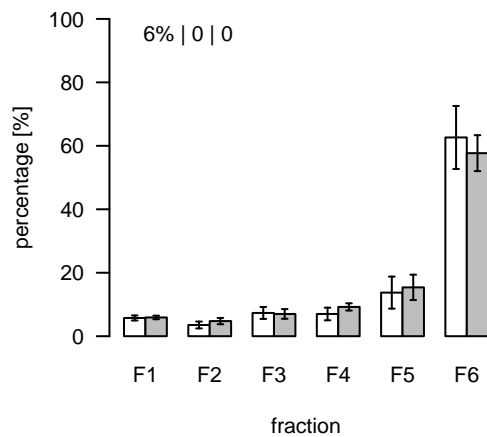

**L25 (m/z=675.418267; rt=2.87114)**  
T/S Cluster: L-2.9-1

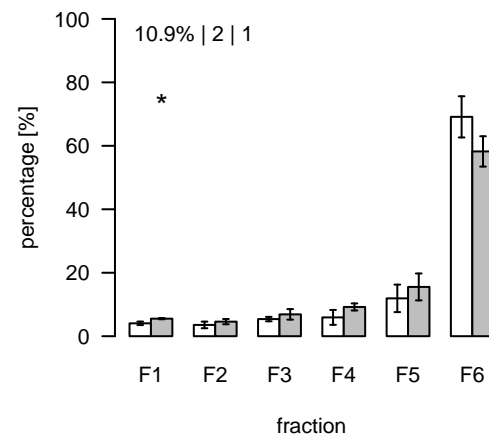

**L26 (m/z=675.409564; rt=2.87128)**  
T/S Cluster: L-2.9-1

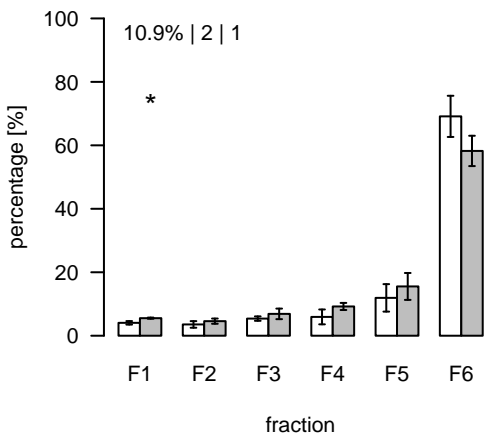

**L27 (m/z=674.386117; rt=2.87155)**  
T/S Cluster: L-2.9-1

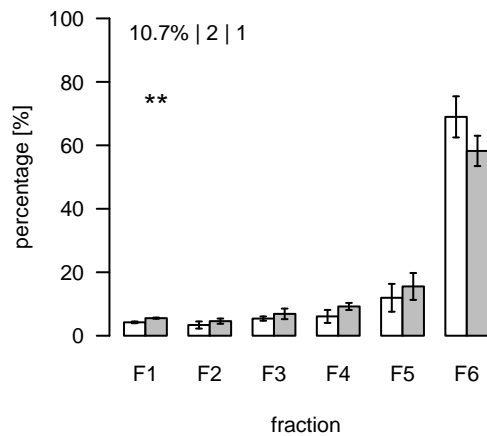

**L30 (m/z=813.52333; rt=2.93787)**  
T/S Cluster: L-2.9-1

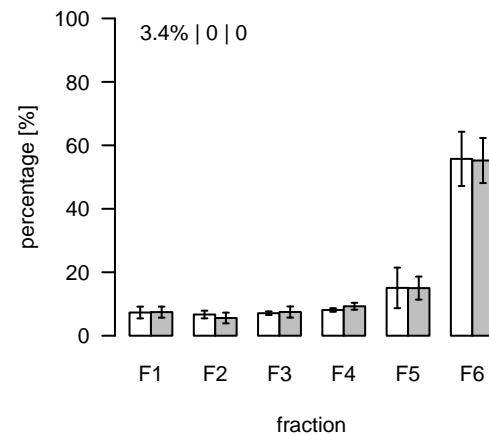

**L32 (m/z=658.419288; rt=2.99569)**  
T/S Cluster: L-3-1

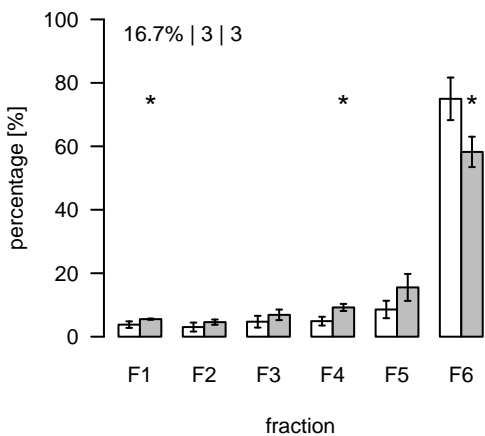

**L33 (m/z=810.505458; rt=3.00466)**  
T/S Cluster: L-3-1

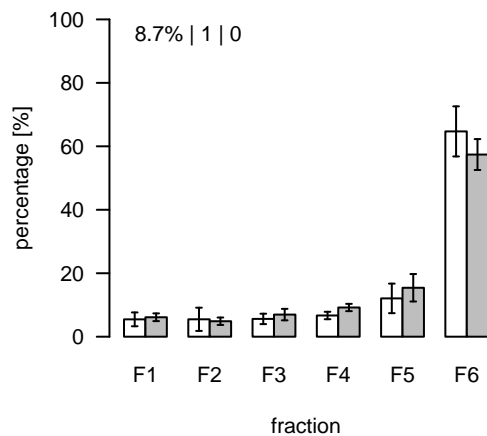

**L34 (m/z=814.536705; rt=3.09915)**  
T/S Cluster: L-3.1-1

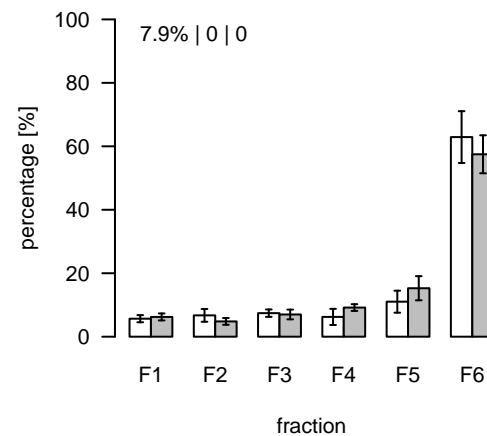

**L35 (m/z=686.451472; rt=3.19106)**  
T/S Cluster: L-3.2-1

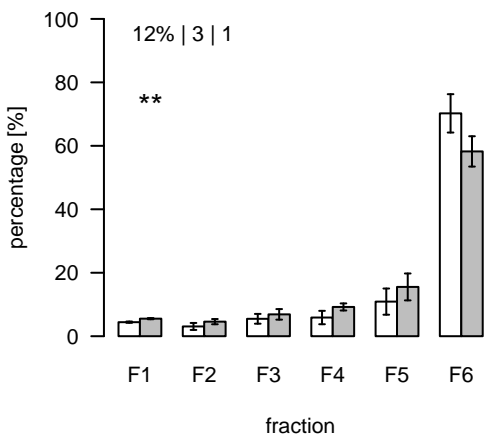

**L36 (m/z=686.431372; rt=3.19114)**  
T/S Cluster: L-3.2-1

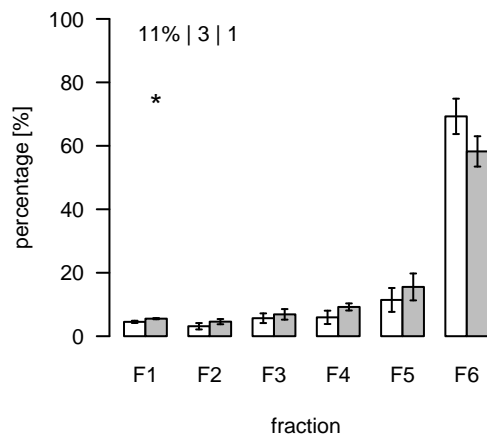

**L37 (m/z=848.508507; rt=3.2258)**  
T/S Cluster: L-3.2-1

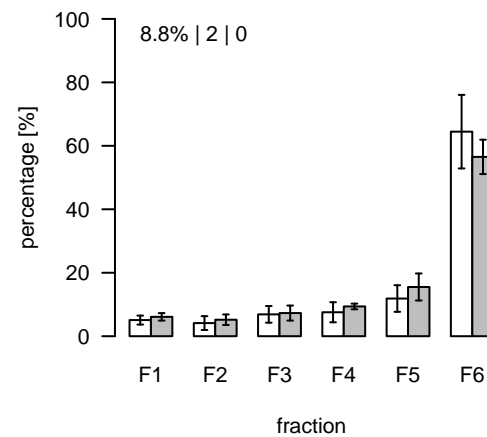

**L38 (m/z=691.414075; rt=3.2267)**  
T/S Cluster: L-3.2-2

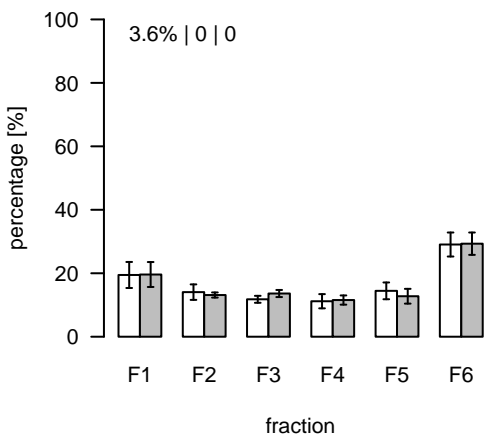

**L46 (m/z=702.445824; rt=3.2722)**  
T/S Cluster: L-3.3-1

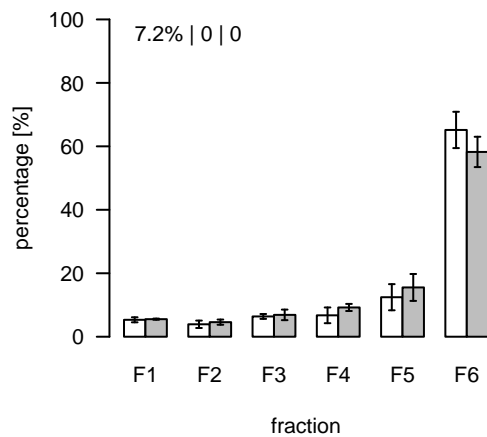

**L39 (m/z=702.44637; rt=3.26054)**  
T/S Cluster: L-3.3-1

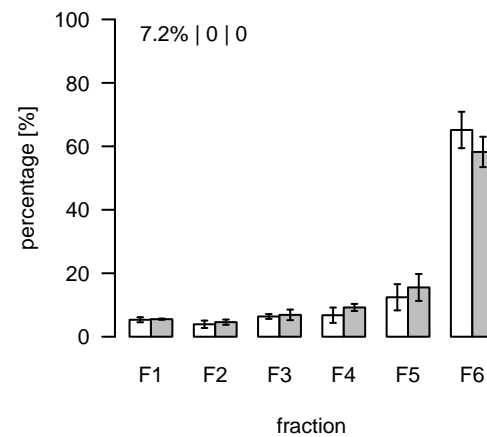

**L40 (m/z=702.422998; rt=3.26067)**  
T/S Cluster: L-3.3-1

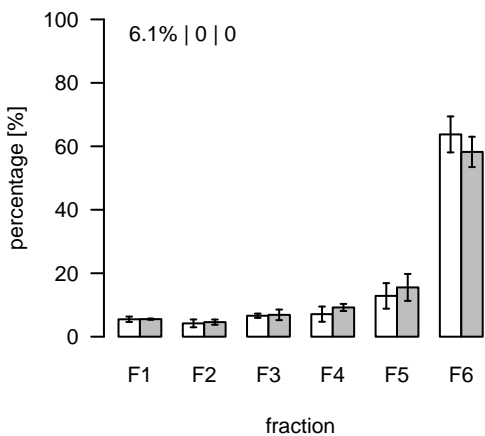

**L52 (m/z=840.519244; rt=3.33556)**  
T/S Cluster: L-3.3-1

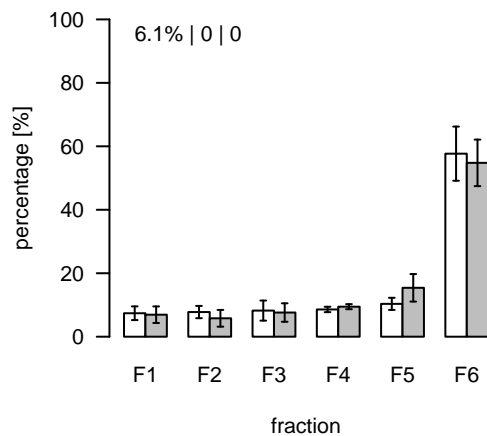

**L42 (m/z=690.438041; rt=3.26458)**  
T/S Cluster: L-3.3-2

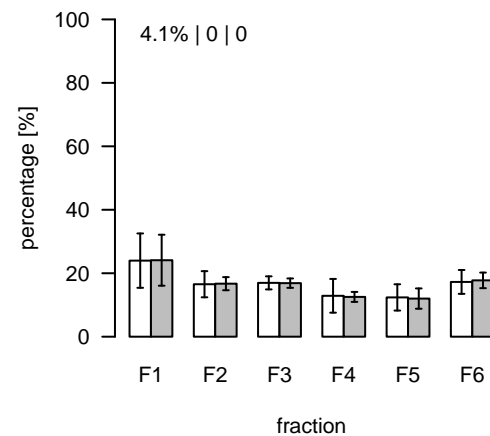

**L43 (m/z=690.424139; rt=3.26604)**  
T/S Cluster: L-3.3-2

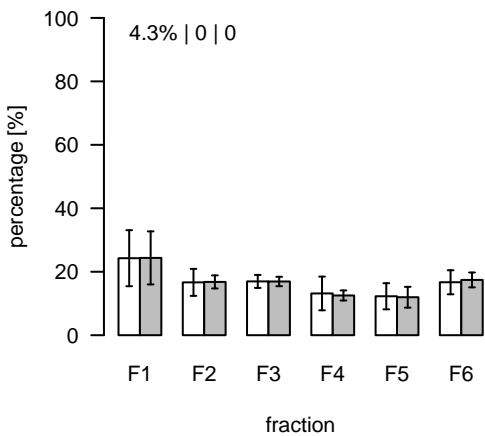

**L41 (m/z=691.441895; rt=3.26165)**  
T/S Cluster: L-3.3-2

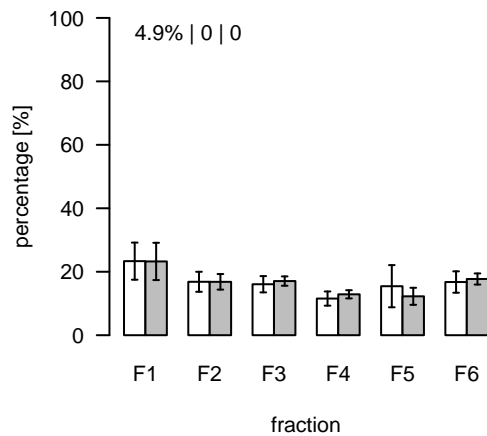

**L44 (m/z=898.541856; rt=3.26742)**  
T/S Cluster: L-3.3-3

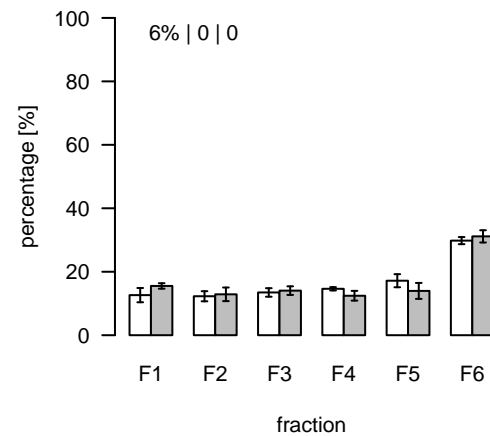

**L45 (m/z=724.478956; rt=3.27052)**  
T/S Cluster: L-3.3-4

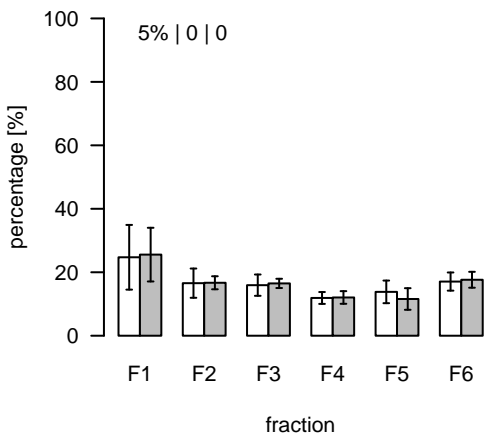

**L49 (m/z=724.453004; rt=3.27522)**  
T/S Cluster: L-3.3-4

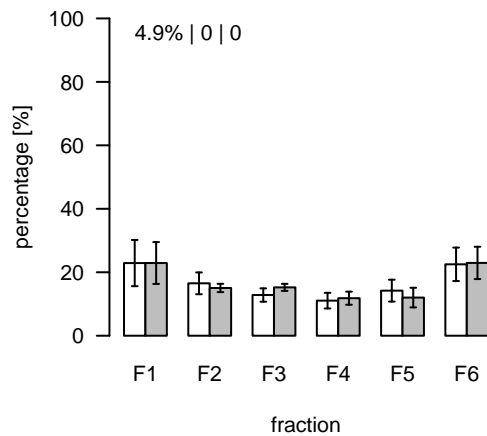

**L47 (m/z=722.466054; rt=3.2742)**  
T/S Cluster: L-3.3-5

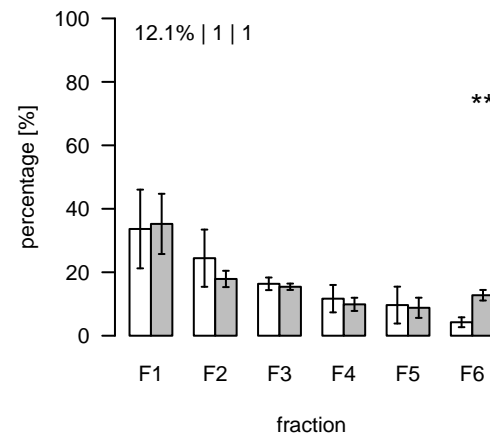

**L48 (m/z=722.462988; rt=3.27425)**  
T/S Cluster: L-3.3-5

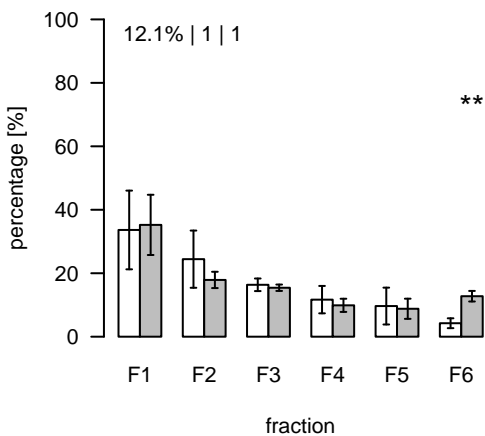

**L50 (m/z=828.545524; rt=3.29643)**  
T/S Cluster: L-3.3-6

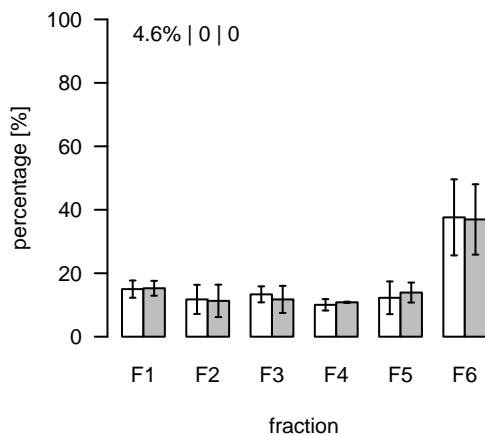

**L51 (m/z=840.55273; rt=3.33359)**  
T/S Cluster: L-3.3-7

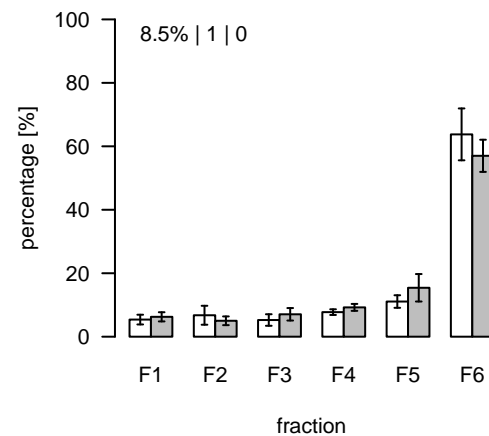

**L72 (m/z=796.525378; rt=3.4493)**  
T/S Cluster: L-3.4-1

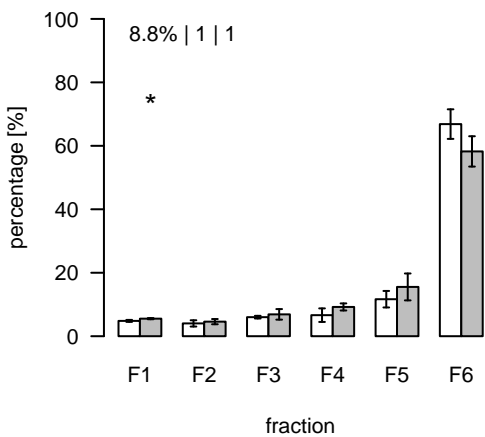

**L73 (m/z=796.485776; rt=3.4494)**  
T/S Cluster: L-3.4-1

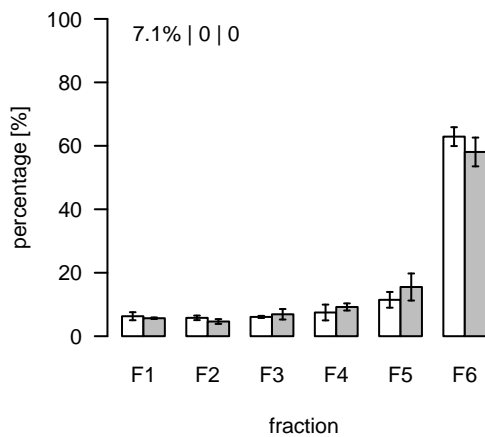

**L62 (m/z=799.464691; rt=3.38856)**  
T/S Cluster: L-3.4-1

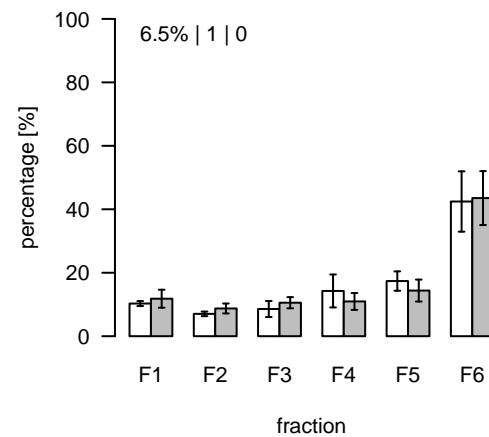

**L71 (m/z=810.504433; rt=3.42113)**  
T/S Cluster: L-3.4-1

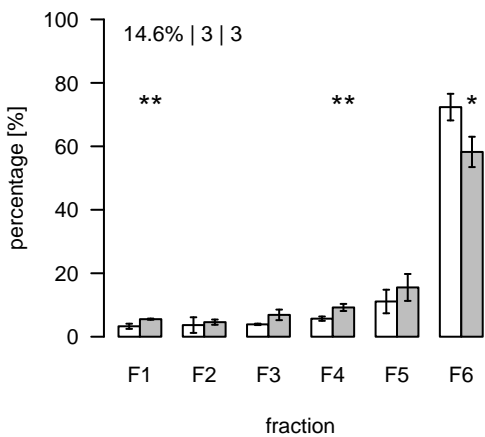

**L54 (m/z=794.509626; rt=3.37348)**  
T/S Cluster: L-3.4-1

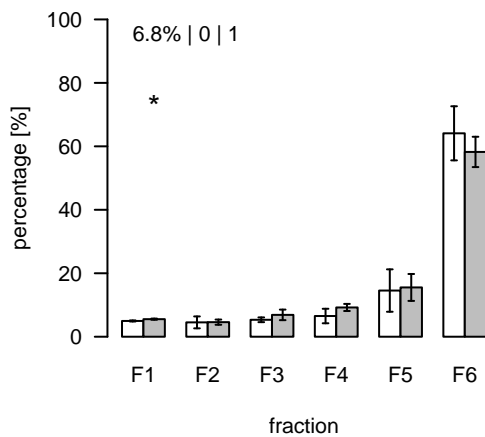

**L53 (m/z=794.478158; rt=3.37347)**  
T/S Cluster: L-3.4-1

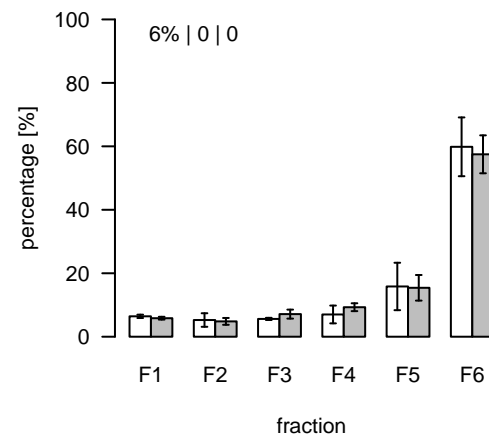

**L55 (m/z=795.488329; rt=3.37397)**  
T/S Cluster: L-3.4-1

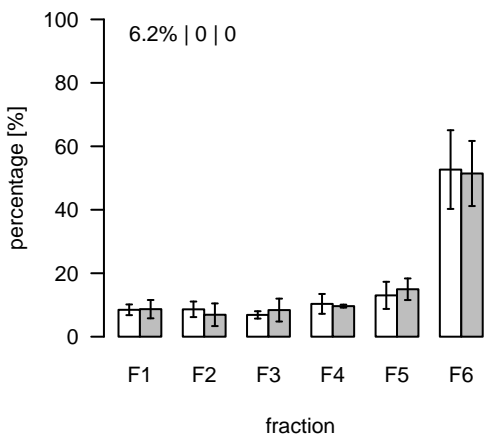

**L56 (m/z=795.51436; rt=3.37446)**  
T/S Cluster: L-3.4-1

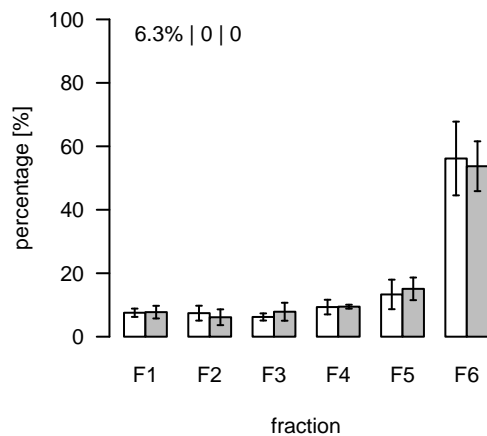

**L58 (m/z=284.331802; rt=3.38021)**  
T/S Cluster: L-3.4-2

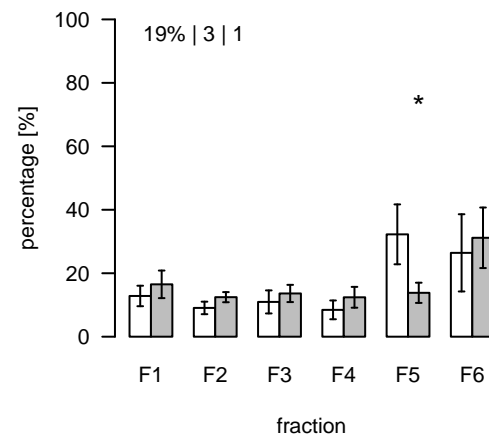

**L57 (m/z=284.328677; rt=3.38003)**  
T/S Cluster: L-3.4-2

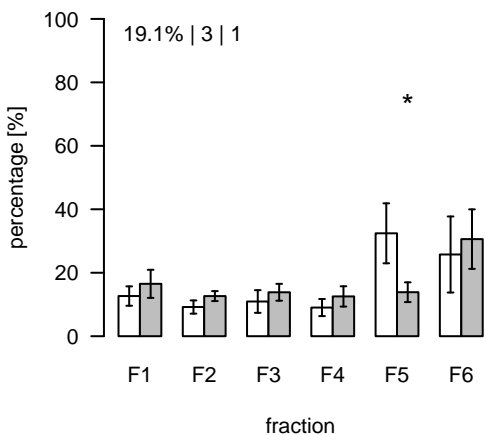

**L59 (m/z=664.42159; rt=3.38503)**  
T/S Cluster: L-3.4-3

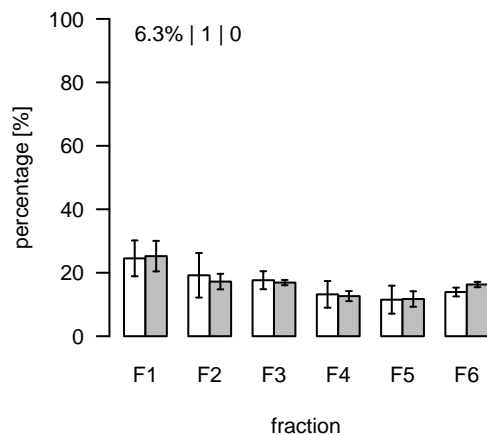

**L60 (m/z=664.402075; rt=3.38509)**  
T/S Cluster: L-3.4-3

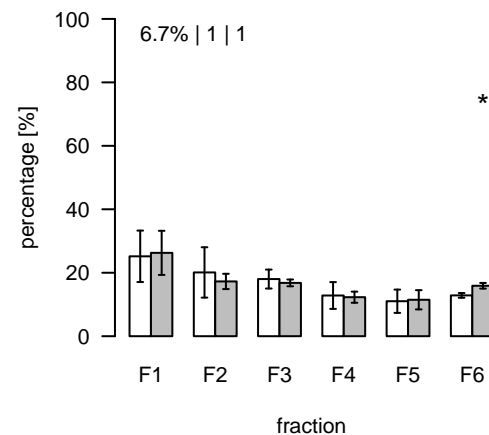

**L61 (m/z=898.541738; rt=3.38554)**  
T/S Cluster: L-3.4-4

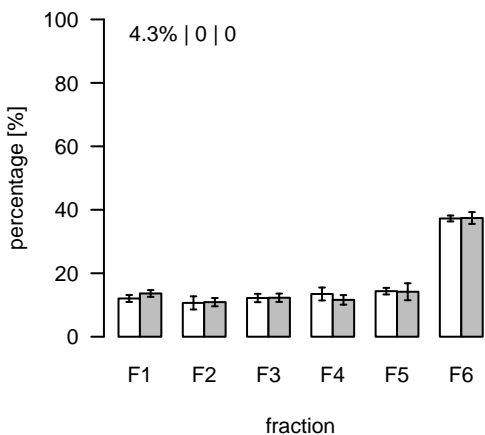

**L64 (m/z=722.463131; rt=3.39946)**  
T/S Cluster: L-3.4-5

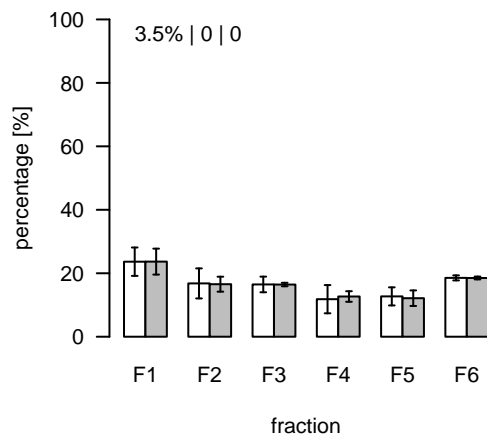

**L65 (m/z=722.466486; rt=3.39949)**  
T/S Cluster: L-3.4-5

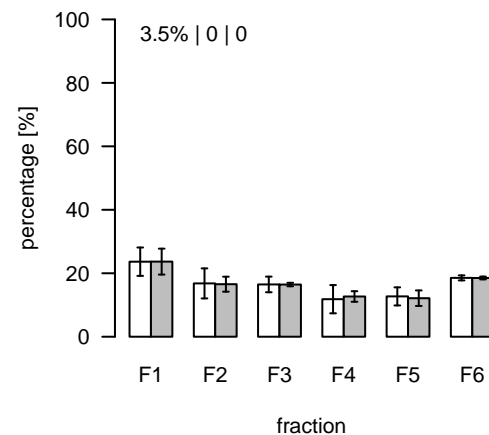

**L63 (m/z=722.491438; rt=3.39937)**  
T/S Cluster: L-3.4-5

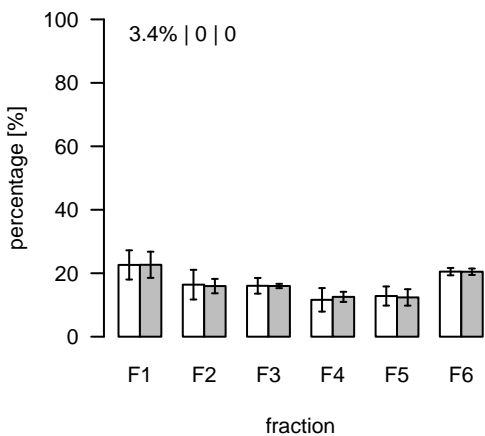

**L66 (m/z=723.467148; rt=3.39962)**  
T/S Cluster: L-3.4-5

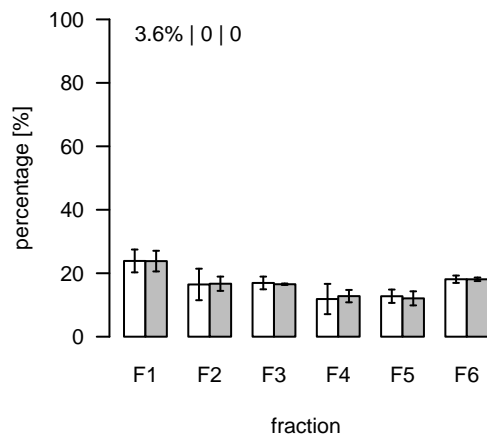

**L67 (m/z=361.232647; rt=3.40037)**  
T/S Cluster: L-3.4-5

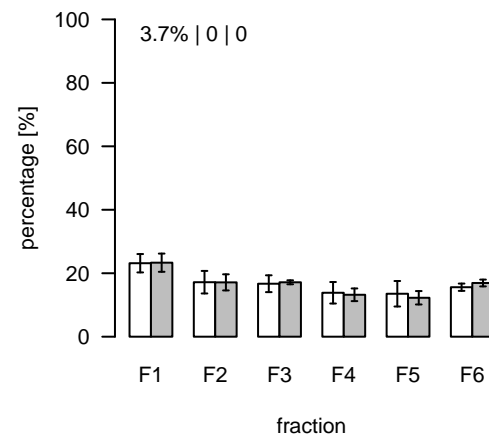

**L68 (m/z=838.538327; rt=3.40692)**  
T/S Cluster: L-3.4-6

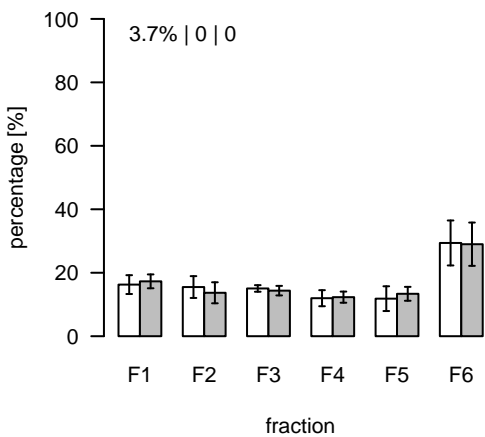

**L69 (m/z=801.485502; rt=3.42084)**  
T/S Cluster: L-3.4-7

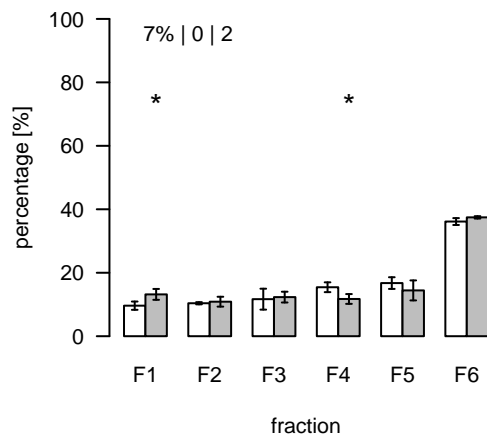

**L70 (m/z=801.462625; rt=3.42084)**  
T/S Cluster: L-3.4-7

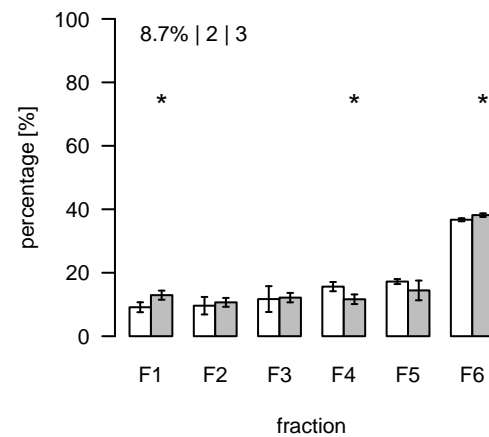

**L88 (m/z=986.586301; rt=3.48328)**  
T/S Cluster: L-3.5-1

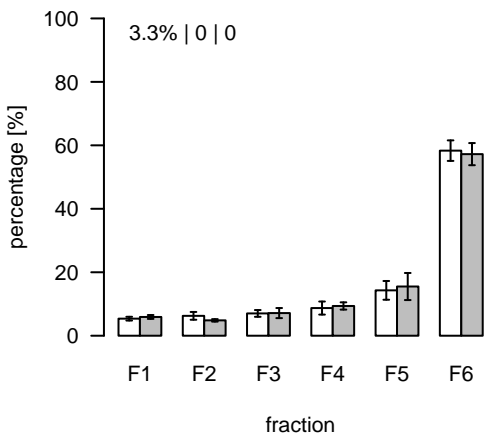

**L86 (m/z=986.618012; rt=3.4831)**  
T/S Cluster: L-3.5-1

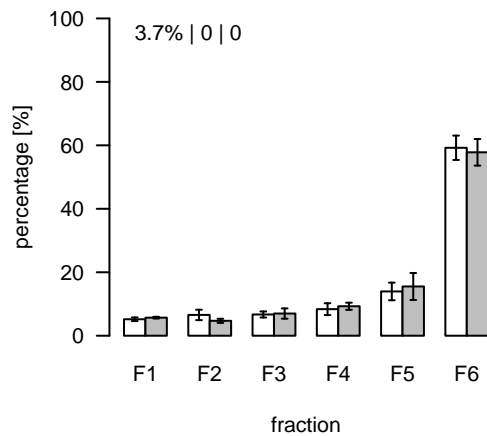

**L91 (m/z=984.579967; rt=3.50054)**  
T/S Cluster: L-3.5-1

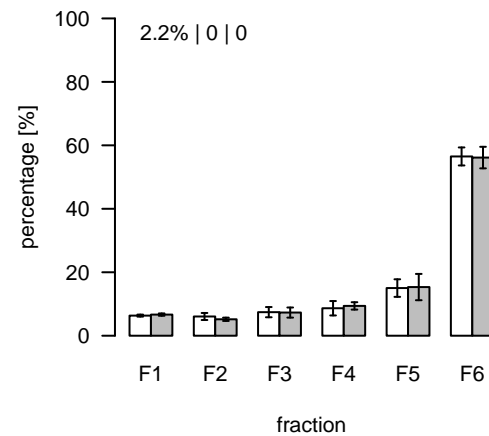

**L92 (m/z=984.600309; rt=3.50095)**  
T/S Cluster: L-3.5-1

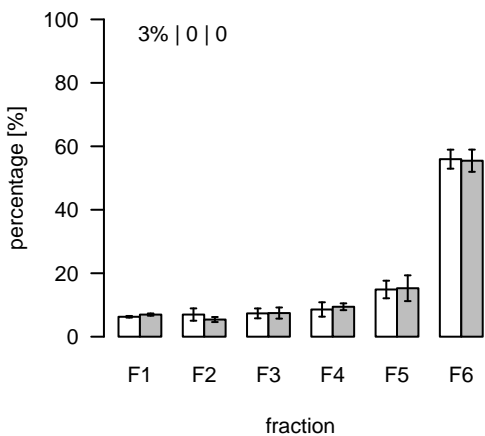

**L74 (m/z=797.52938; rt=3.4503)**  
T/S Cluster: L-3.5-1

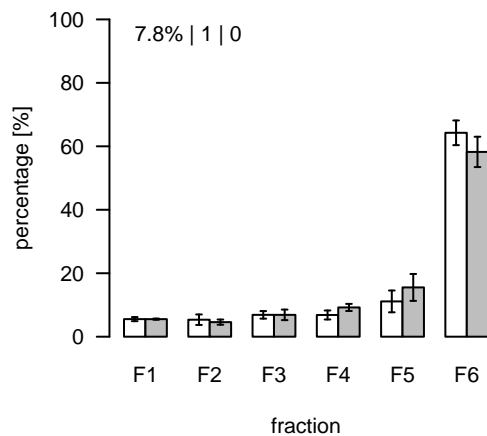

**L96 (m/z=815.460007; rt=3.54218)**  
T/S Cluster: L-3.5-1

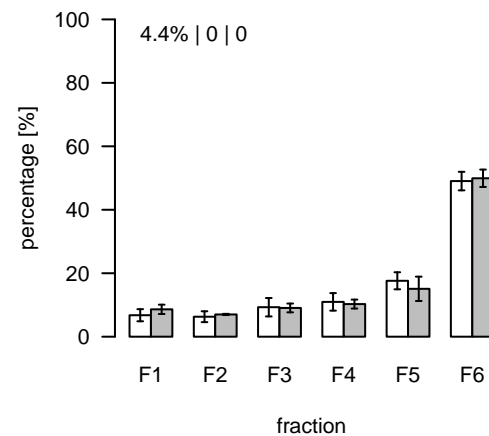

**L75 (m/z=812.519826; rt=3.45977)**  
T/S Cluster: L-3.5-1

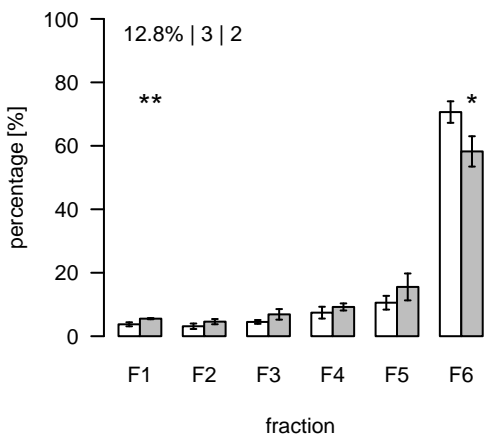

**L79 (m/z=987.581683; rt=3.48078)**  
T/S Cluster: L-3.5-1

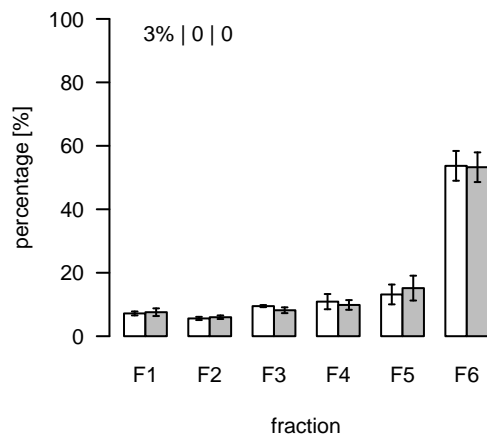

**L80 (m/z=987.617111; rt=3.48109)**  
T/S Cluster: L-3.5-1

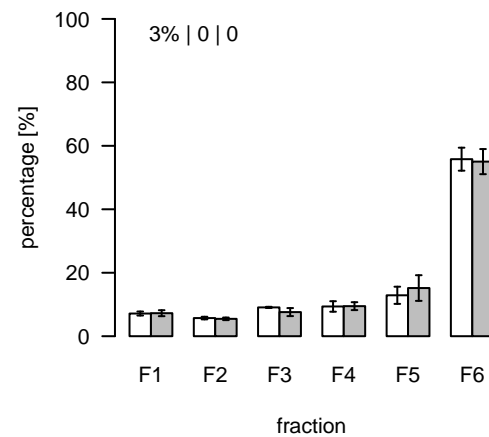

**L76 (m/z=814.525245; rt=3.46649)**  
T/S Cluster: L-3.5-2

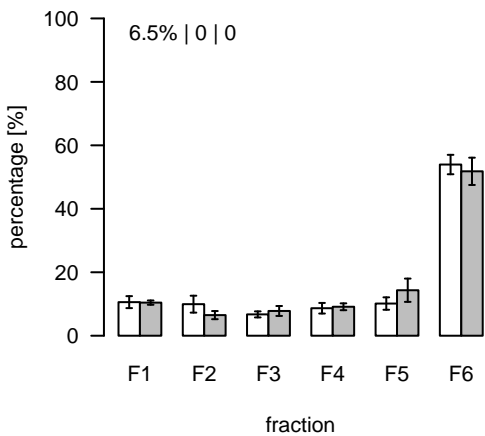

**L78 (m/z=814.498689; rt=3.47805)**  
T/S Cluster: L-3.5-2

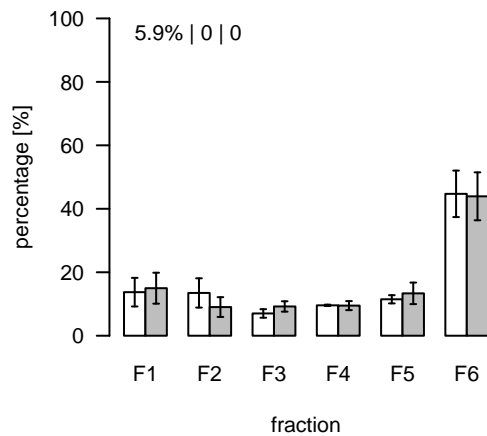

**L77 (m/z=822.553506; rt=3.4779)**  
T/S Cluster: L-3.5-3

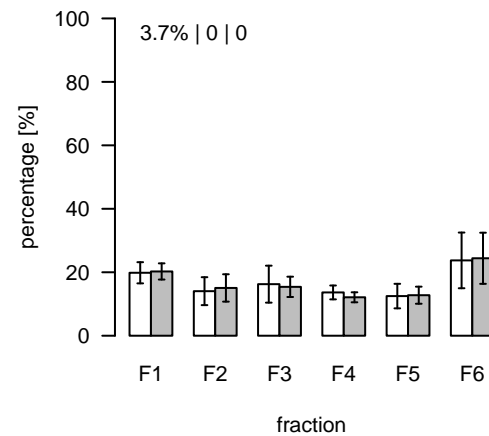



**L82 (m/z=652.423088; rt=3.48127)**  
T/S Cluster: L-3.5-4

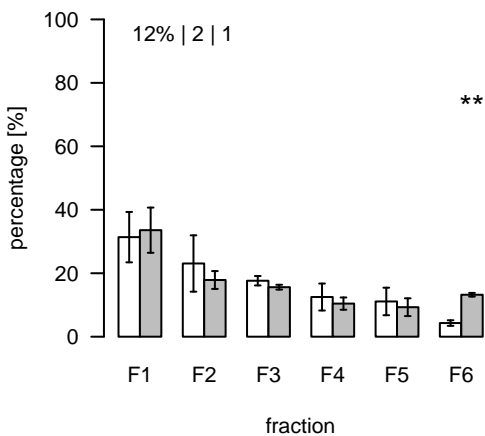

**L81 (m/z=652.407087; rt=3.48112)**  
T/S Cluster: L-3.5-4

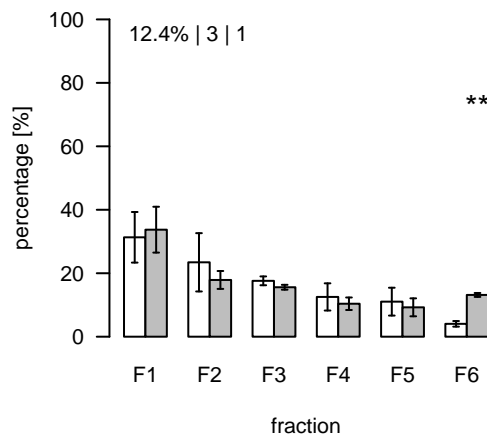

**L83 (m/z=748.477682; rt=3.48207)**  
T/S Cluster: L-3.5-5

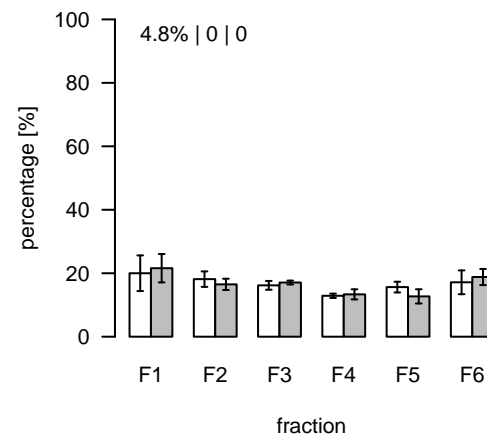

**L87 (m/z=680.452926; rt=3.48321)**  
T/S Cluster: L-3.5-6

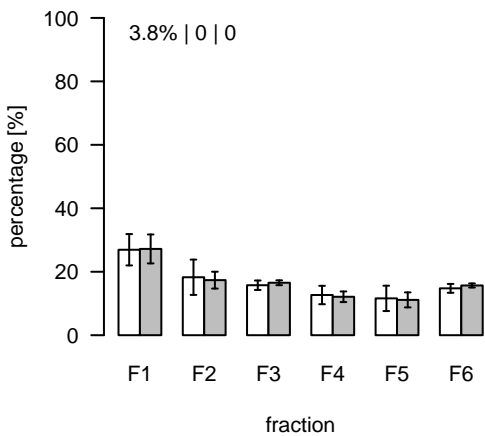

**L89 (m/z=680.432893; rt=3.48356)**  
T/S Cluster: L-3.5-6

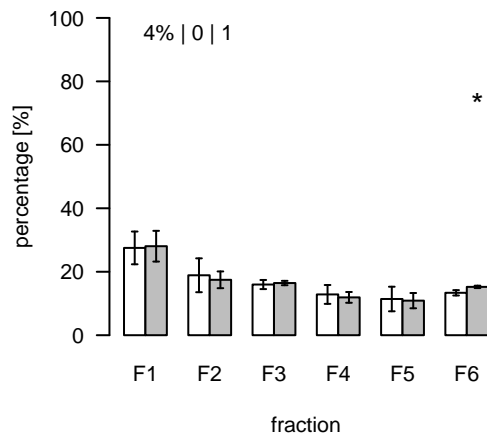

**L84 (m/z=681.458616; rt=3.48283)**  
T/S Cluster: L-3.5-6

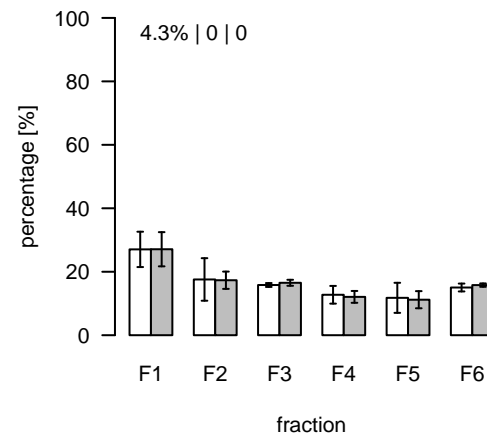

**L85 (m/z=681.443033; rt=3.48288)**  
T/S Cluster: L-3.5-6

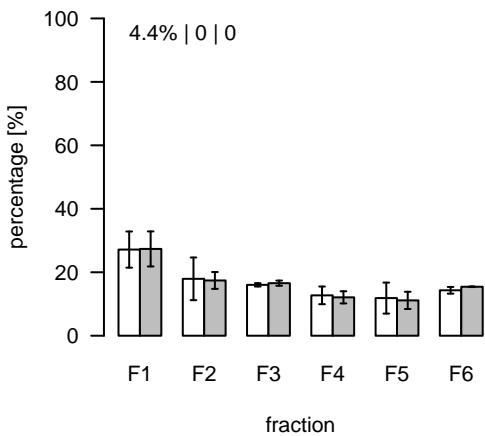

**L90 (m/z=836.537757; rt=3.49571)**  
T/S Cluster: L-3.5-7

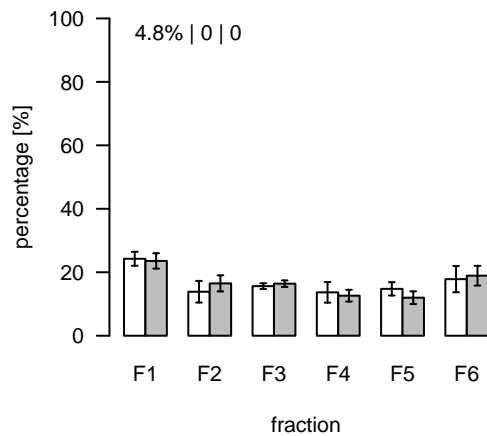

**L100 (m/z=842.514619; rt=3.54818)**  
T/S Cluster: L-3.5-8

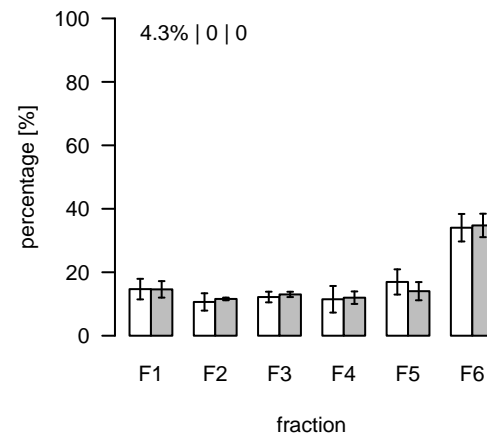

**L97 (m/z=842.549188; rt=3.54747)**  
T/S Cluster: L-3.5-8

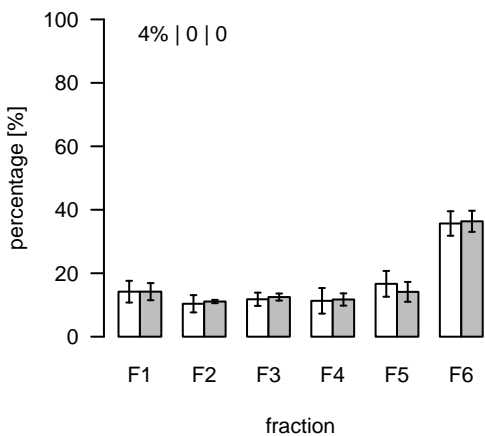

**L99 (m/z=843.517242; rt=3.54795)**  
T/S Cluster: L-3.5-8

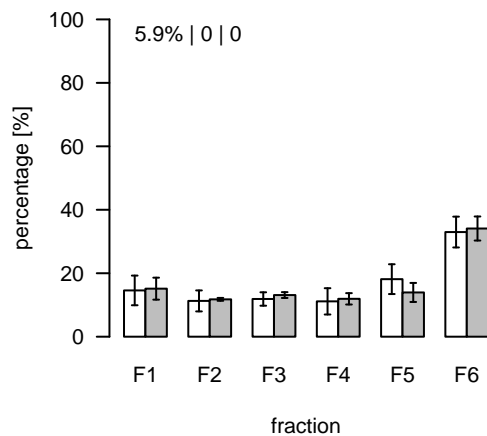

**L98 (m/z=843.536121; rt=3.54766)**  
T/S Cluster: L-3.5-8

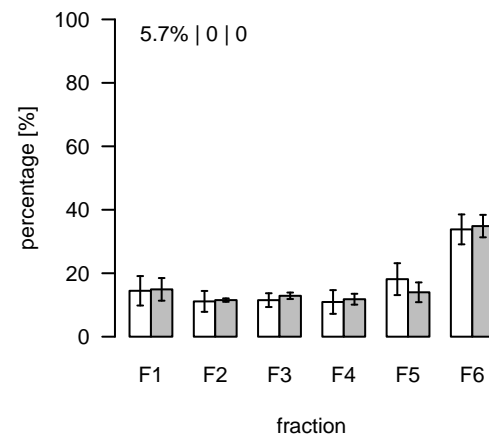

**L93 (m/z=678.447089; rt=3.52906)**  
T/S Cluster: L-3.5-8

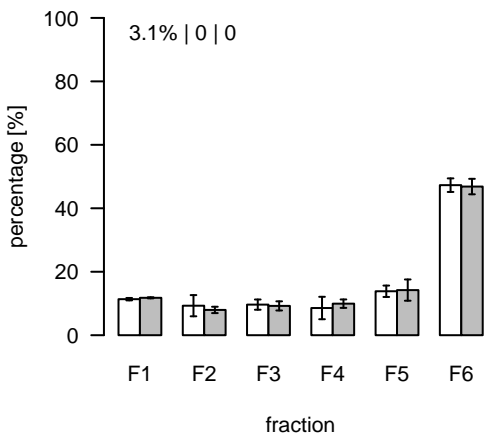

**L94 (m/z=678.444946; rt=3.52915)**  
T/S Cluster: L-3.5-8

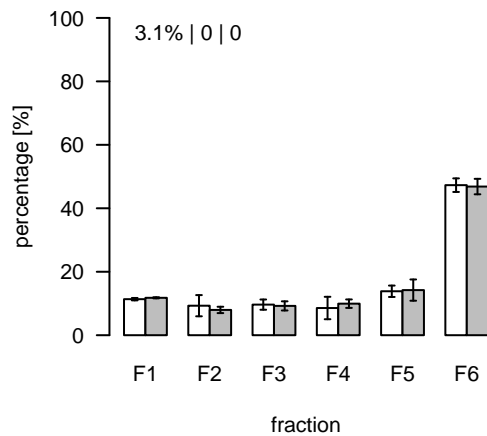

**L95 (m/z=678.459161; rt=3.52933)**  
T/S Cluster: L-3.5-8

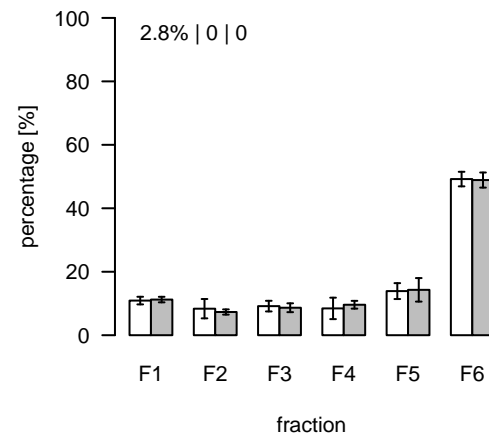

**L101 (m/z=421.258625; rt=3.54877)**  
T/S Cluster: L-3.5-8

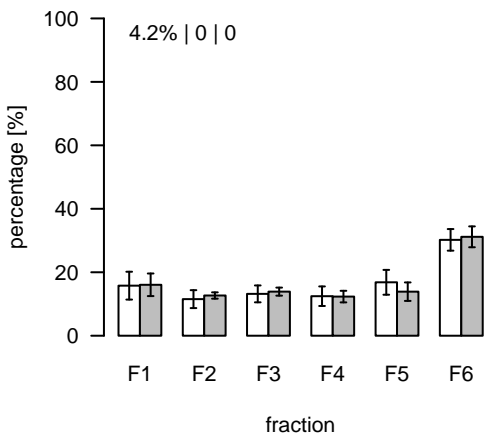

**L102 (m/z=722.463432; rt=3.56588)**  
T/S Cluster: L-3.6-1

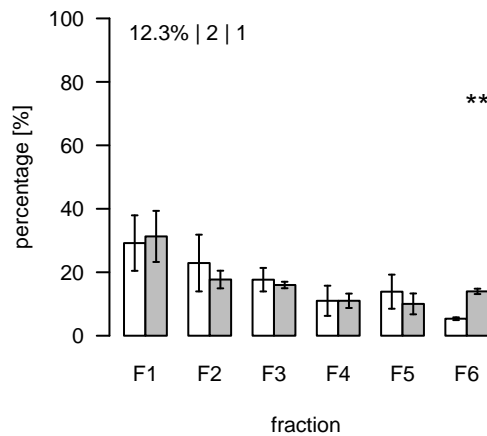

**L110 (m/z=722.466597; rt=3.57492)**  
T/S Cluster: L-3.6-1

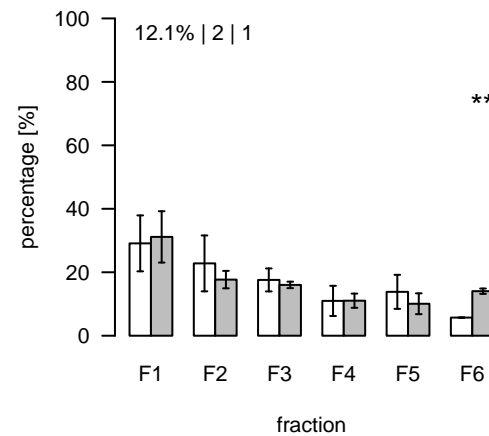

**L116 (m/z=722.455676; rt=3.58788)**  
T/S Cluster: L-3.6-1

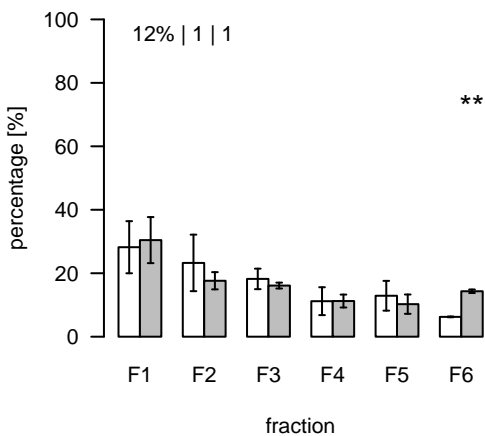

**L109 (m/z=722.447593; rt=3.57491)**  
T/S Cluster: L-3.6-1

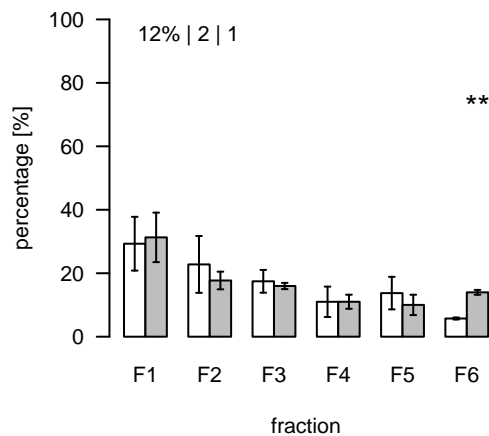

**L103 (m/z=722.490808; rt=3.56606)**  
T/S Cluster: L-3.6-1

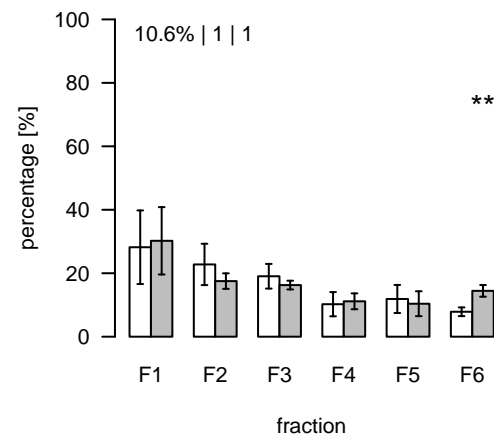

**L104 (m/z=593.278874; rt=3.57045)**  
T/S Cluster: L-3.6-2

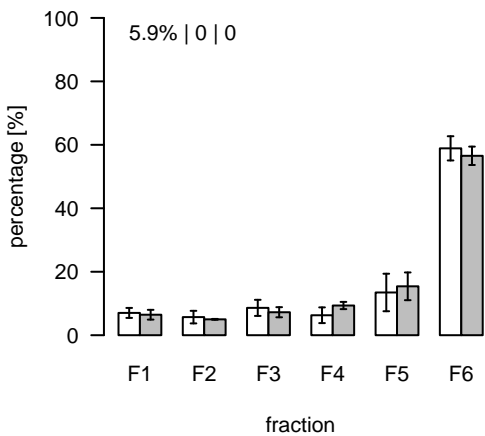

**L105 (m/z=593.259852; rt=3.57047)**  
T/S Cluster: L-3.6-2

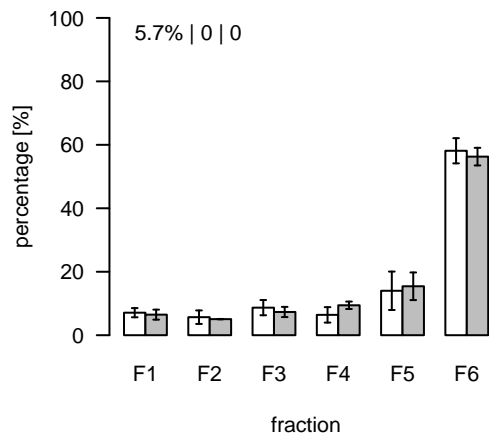

**L106 (m/z=594.284807; rt=3.57066)**  
T/S Cluster: L-3.6-2

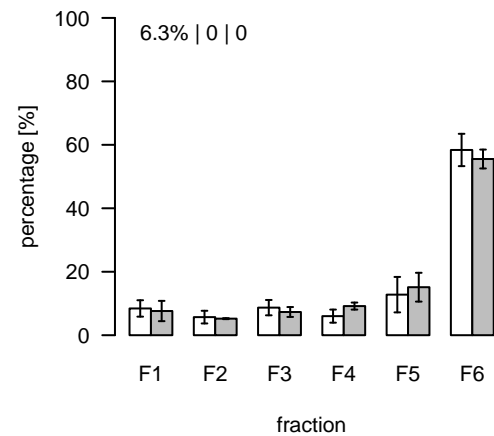

**L107 (m/z=594.274306; rt=3.57068)**  
T/S Cluster: L-3.6-2

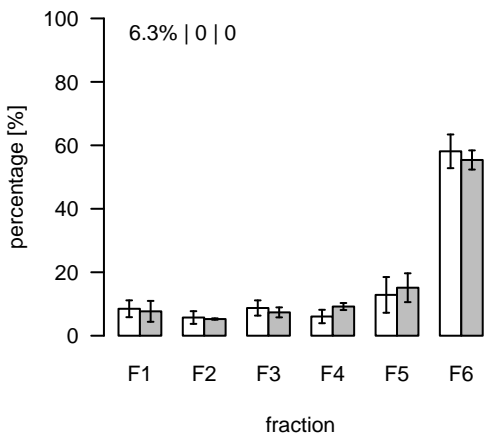

**L114 (m/z=795.5146; rt=3.58173)**  
T/S Cluster: L-3.6-3

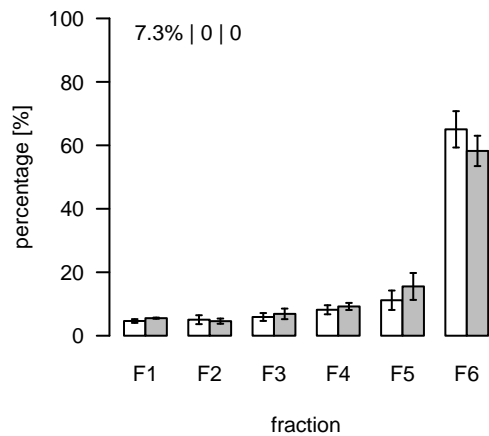

**L111 (m/z=794.509588; rt=3.57706)**  
T/S Cluster: L-3.6-3

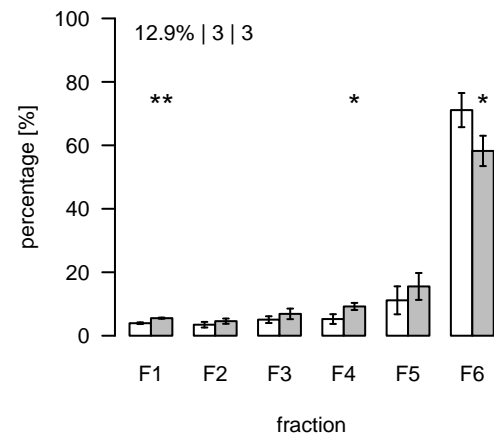

**L108 (m/z=792.494557; rt=3.57434)**  
T/S Cluster: L-3.6-3

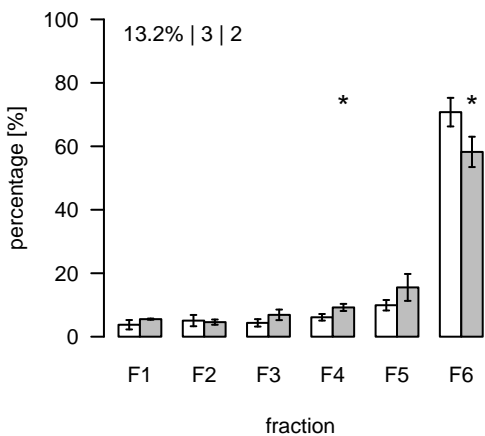

**L112 (m/z=795.488414; rt=3.58165)**  
T/S Cluster: L-3.6-3

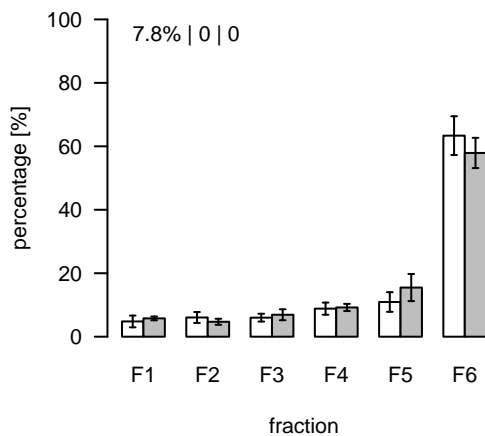

**L115 (m/z=794.478452; rt=3.58337)**  
T/S Cluster: L-3.6-3

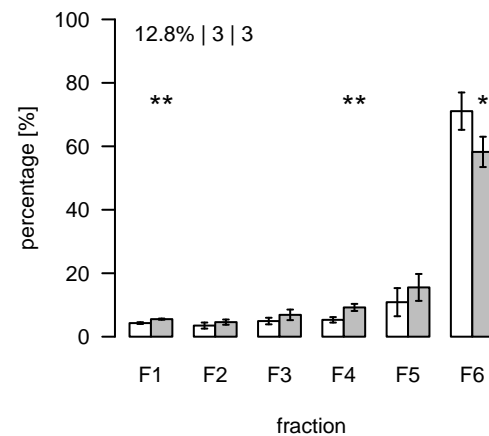

**L113 (m/z=748.478106; rt=3.58171)**  
T/S Cluster: L-3.6-4

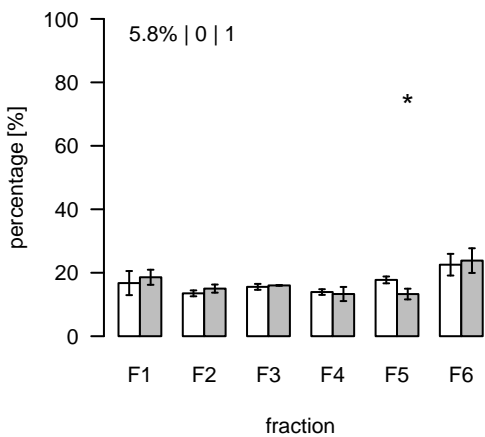

**L117 (m/z=792.494438; rt=3.60603)**  
T/S Cluster: L-3.6-5

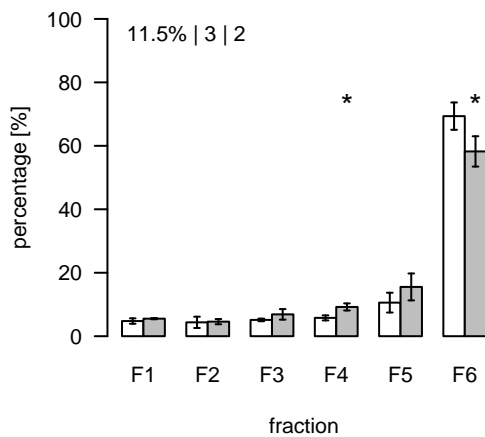

**L128 (m/z=1002.610012; rt=3.62033)**  
T/S Cluster: L-3.6-5

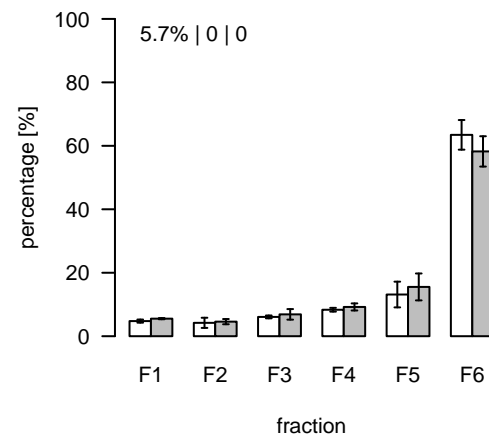

**L127 (m/z=1002.57197; rt=3.61837)**  
T/S Cluster: L-3.6-5

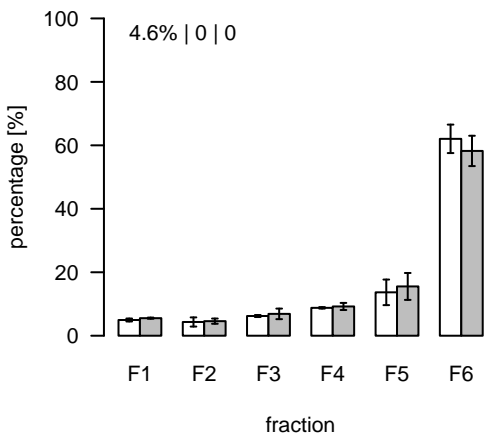

**L129 (m/z=806.48662; rt=3.62504)**  
T/S Cluster: L-3.6-5

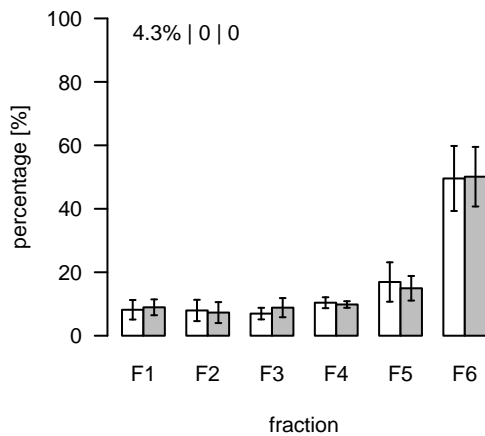

**L119 (m/z=690.439425; rt=3.61312)**  
T/S Cluster: L-3.6-6

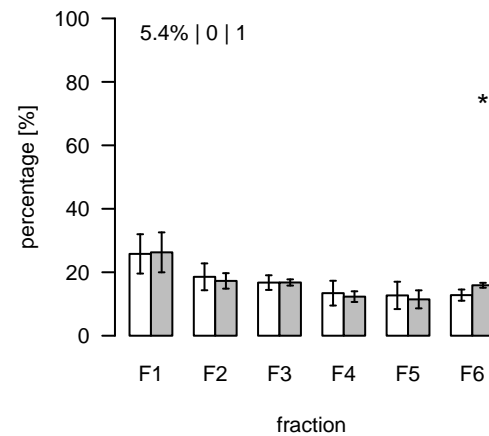

**L120 (m/z=690.43743; rt=3.61394)**  
T/S Cluster: L-3.6-6

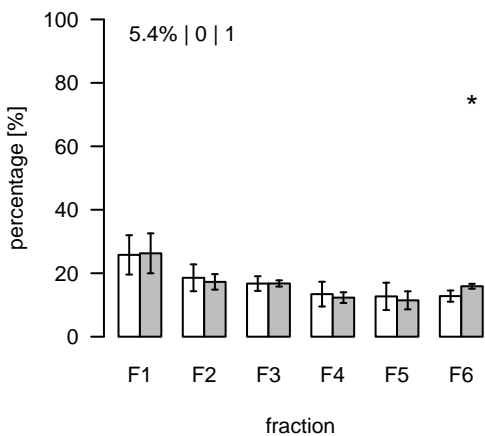

**L121 (m/z=690.426556; rt=3.61581)**  
T/S Cluster: L-3.6-6

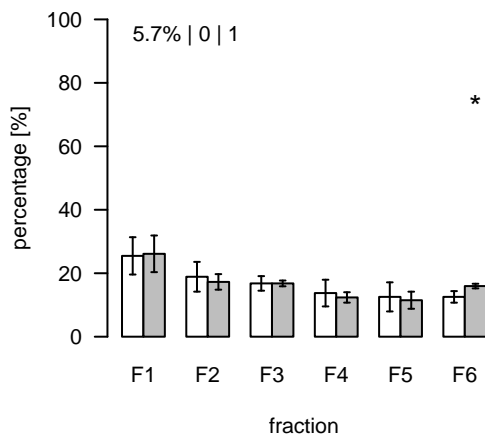

**L118 (m/z=690.463634; rt=3.61108)**  
T/S Cluster: L-3.6-6

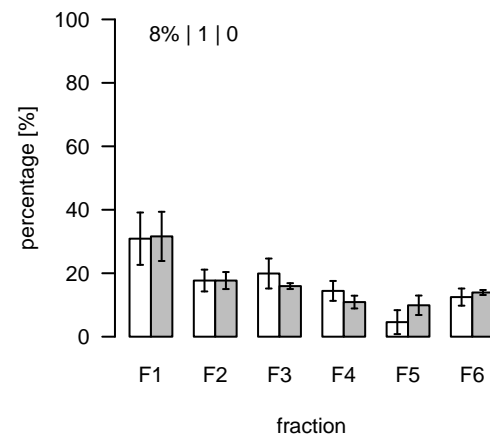

**L126 (m/z=638.444823; rt=3.61746)**  
T/S Cluster: L-3.6-7

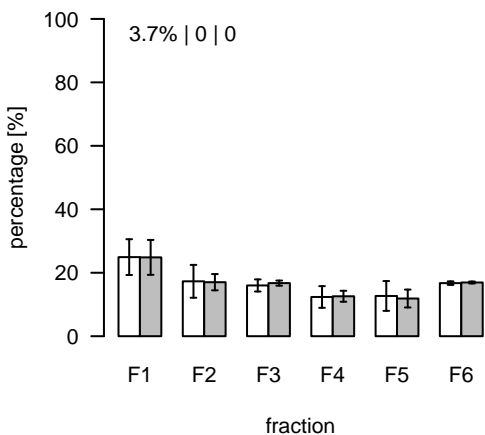

**L124 (m/z=638.430416; rt=3.61718)**  
T/S Cluster: L-3.6-7

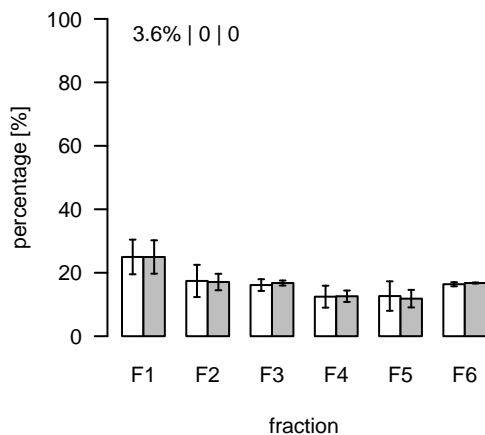

**L123 (m/z=639.437999; rt=3.61699)**  
T/S Cluster: L-3.6-7

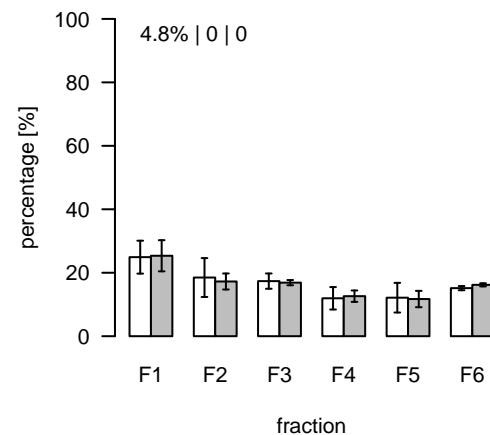

**L125 (m/z=639.45025; rt=3.61718)**  
T/S Cluster: L-3.6-7

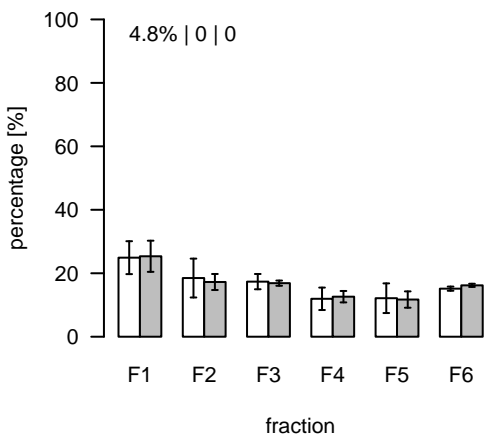

**L122 (m/z=319.221655; rt=3.61677)**  
T/S Cluster: L-3.6-7

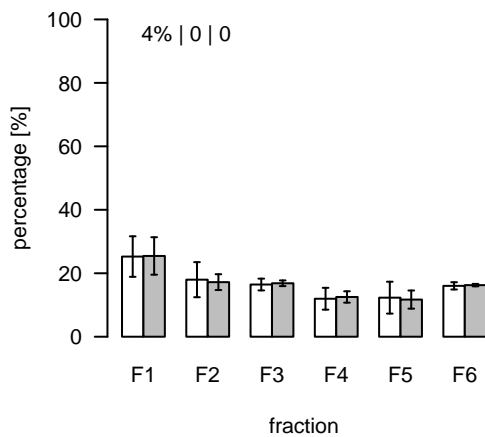

**L130 (m/z=706.469389; rt=3.62959)**  
T/S Cluster: L-3.6-8

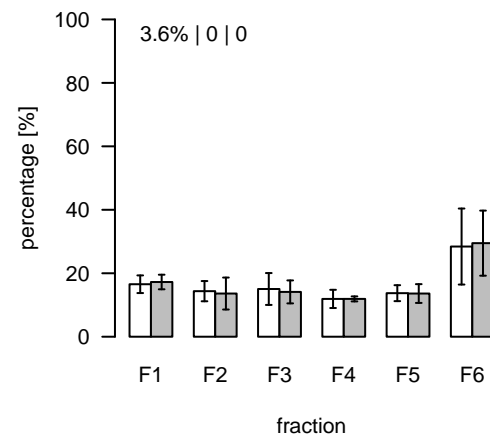

**L131 (m/z=844.51624; rt=3.65103)**  
T/S Cluster: L-3.7-1

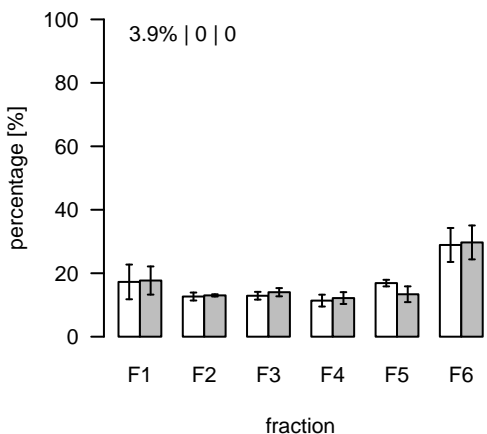

**L139 (m/z=844.529425; rt=3.65238)**  
T/S Cluster: L-3.7-1

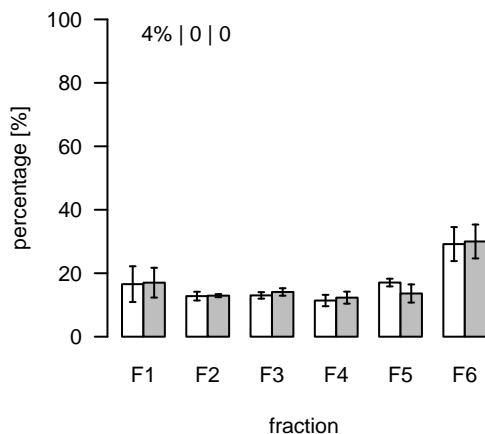

**L132 (m/z=402.272308; rt=3.65112)**  
T/S Cluster: L-3.7-2

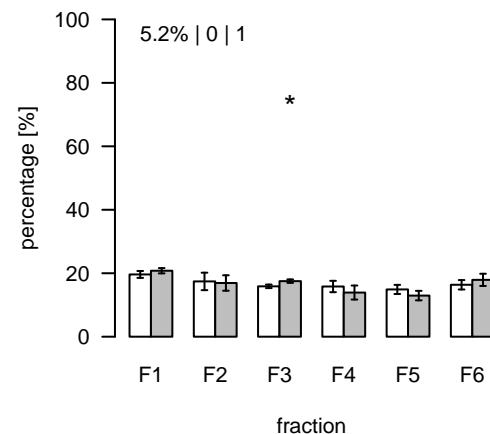

**L136 (m/z=842.513579; rt=3.65223)**  
T/S Cluster: L-3.7-3

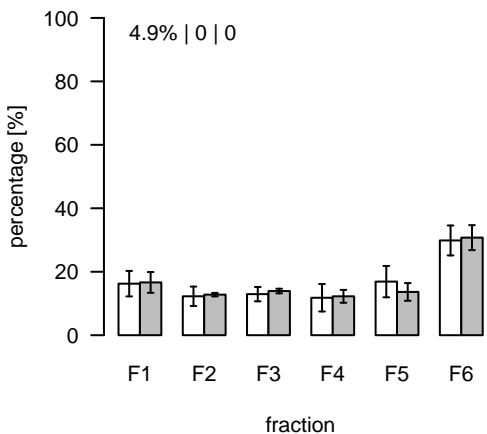

**L133 (m/z=843.516913; rt=3.65148)**  
T/S Cluster: L-3.7-3

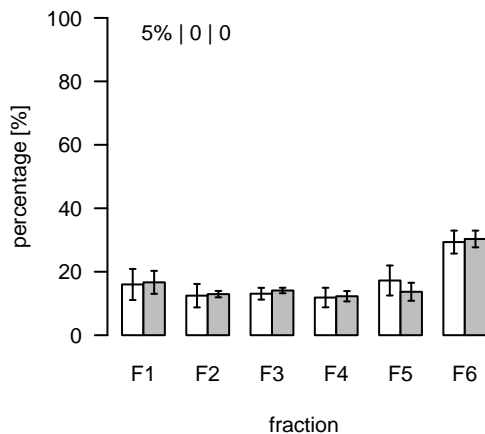

**L134 (m/z=843.516913; rt=3.65148)**  
T/S Cluster: L-3.7-3

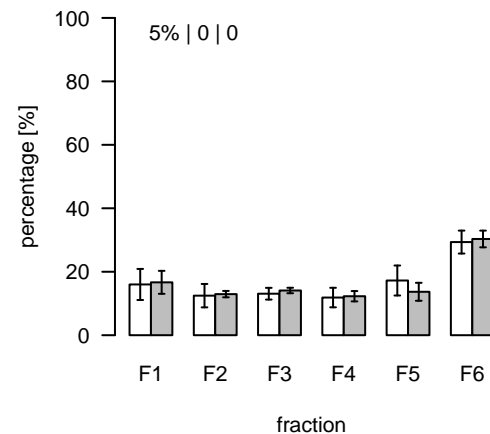

**L142 (m/z=842.547932; rt=3.65278)**  
T/S Cluster: L-3.7-3

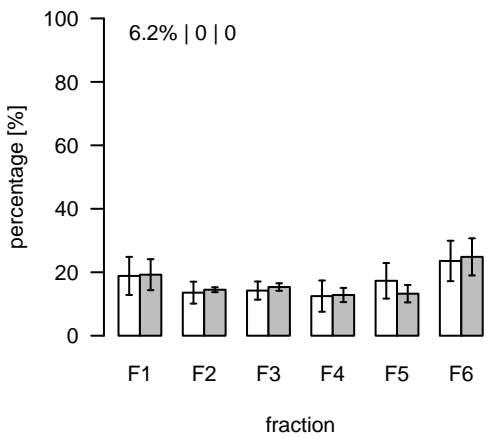

**L140 (m/z=843.547498; rt=3.65242)**  
T/S Cluster: L-3.7-3

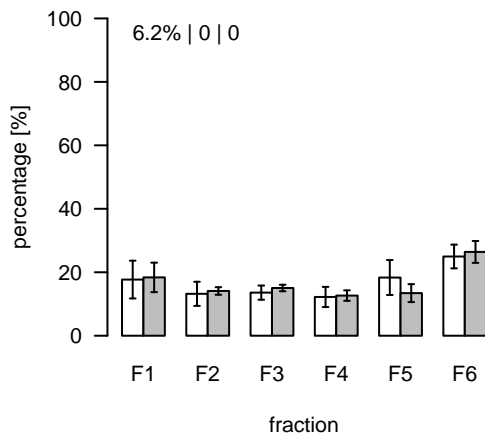

**L141 (m/z=421.258836; rt=3.65245)**  
T/S Cluster: L-3.7-3

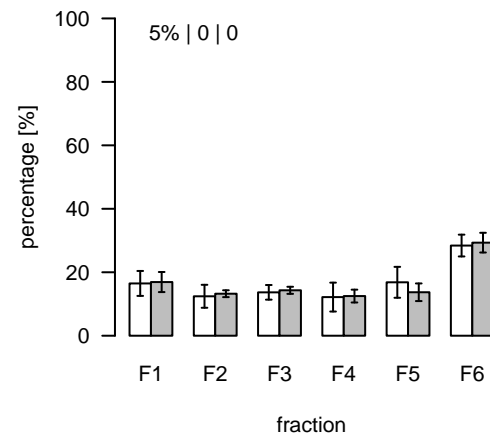

**L144 (m/z=804.543424; rt=3.65345)**  
T/S Cluster: L-3.7-4

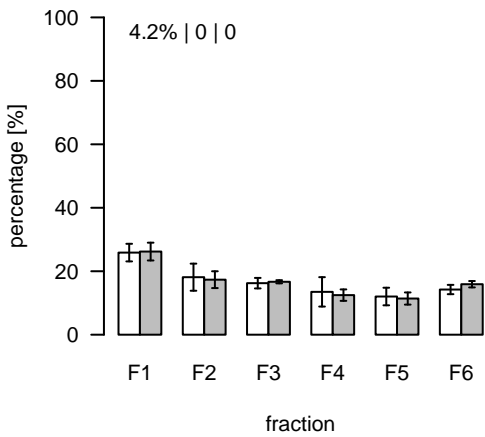

**L145 (m/z=804.547747; rt=3.65356)**  
T/S Cluster: L-3.7-4

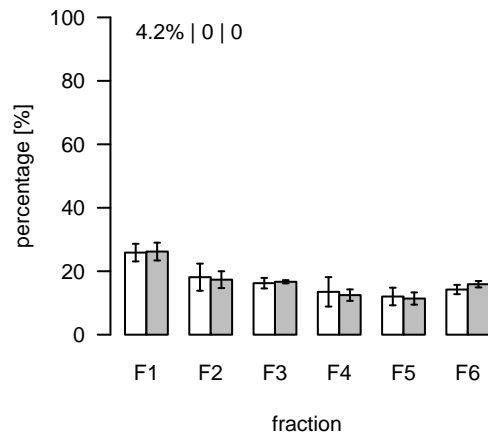

**L135 (m/z=805.54641; rt=3.65206)**  
T/S Cluster: L-3.7-4

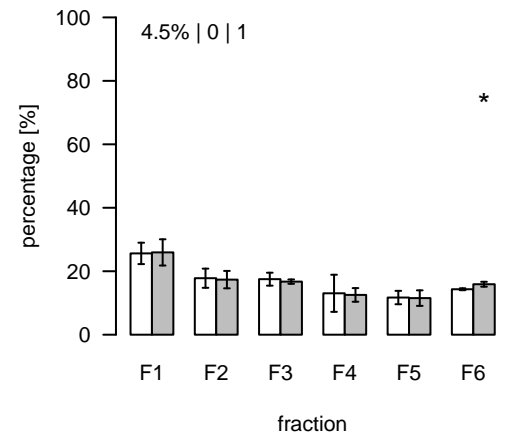

**L137 (m/z=805.551517; rt=3.65231)**  
T/S Cluster: L-3.7-4

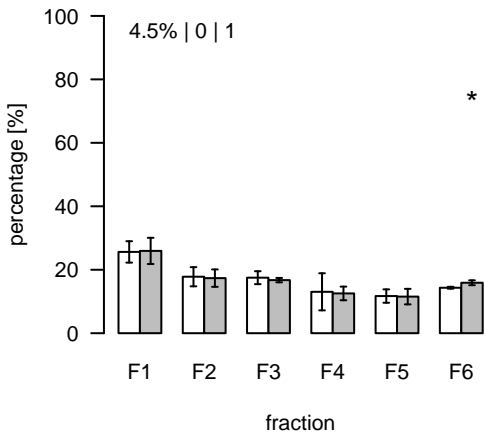

**L189 (m/z=802.530374; rt=3.74937)**  
T/S Cluster: L-3.7-4

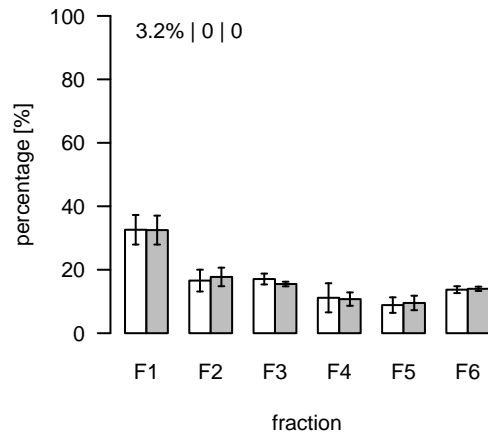

**L138 (m/z=805.583001; rt=3.65238)**  
T/S Cluster: L-3.7-5

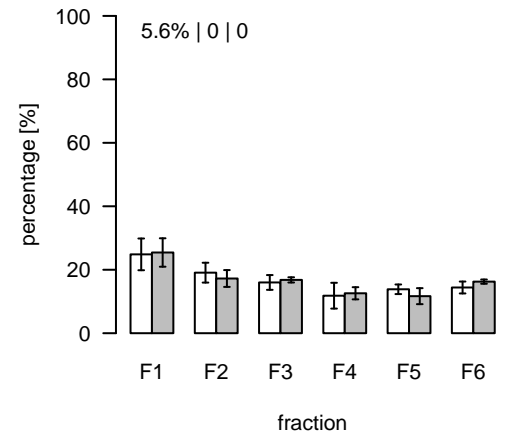

**L143 (m/z=806.532826; rt=3.65303)**  
T/S Cluster: L-3.7-6

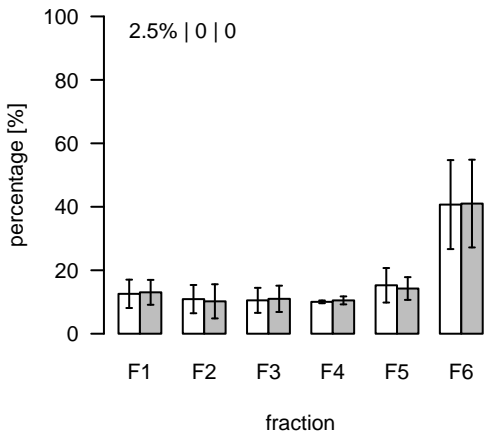

**L146 (m/z=804.593287; rt=3.65479)**  
T/S Cluster: L-3.7-7

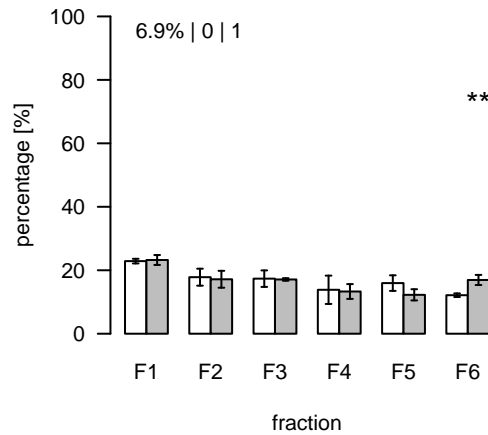

**L178 (m/z=674.445355; rt=3.69484)**  
T/S Cluster: L-3.7-8

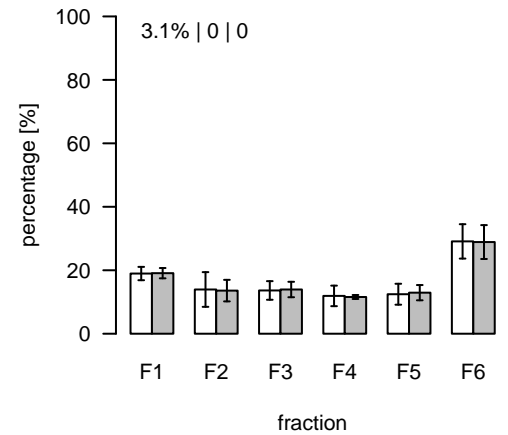

**L179 (m/z=674.428876; rt=3.69505)**  
T/S Cluster: L-3.7-8

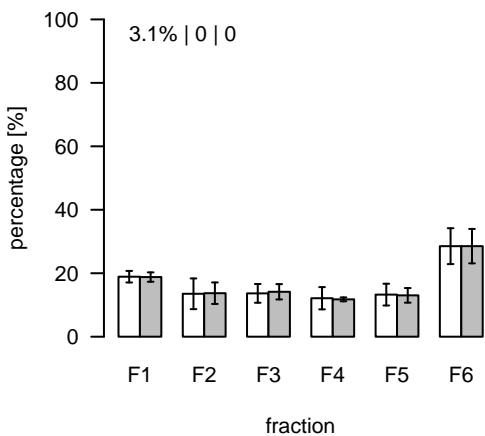

**L147 (m/z=826.529821; rt=3.65753)**  
T/S Cluster: L-3.7-8

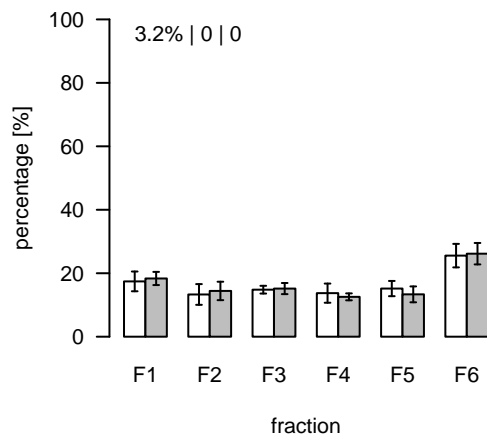

**L148 (m/z=826.527052; rt=3.65763)**  
T/S Cluster: L-3.7-8

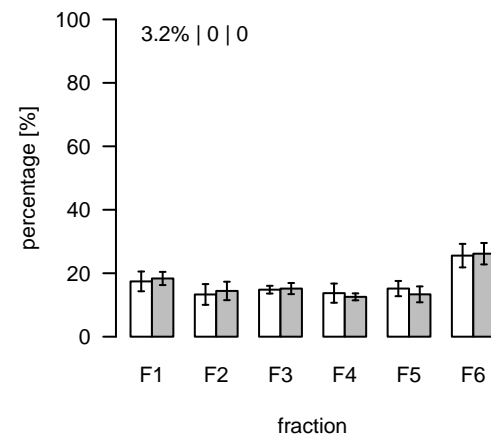

**L150 (m/z=826.501029; rt=3.65872)**  
T/S Cluster: L-3.7-8

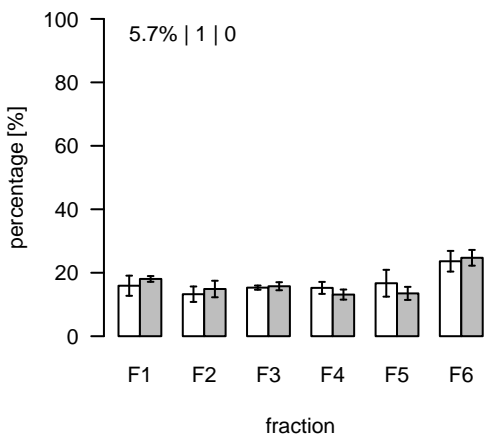

**L177 (m/z=675.446454; rt=3.69394)**  
T/S Cluster: L-3.7-8

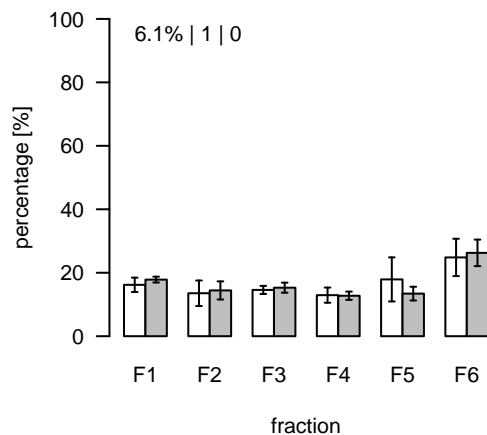

**L149 (m/z=827.531567; rt=3.65863)**  
T/S Cluster: L-3.7-9

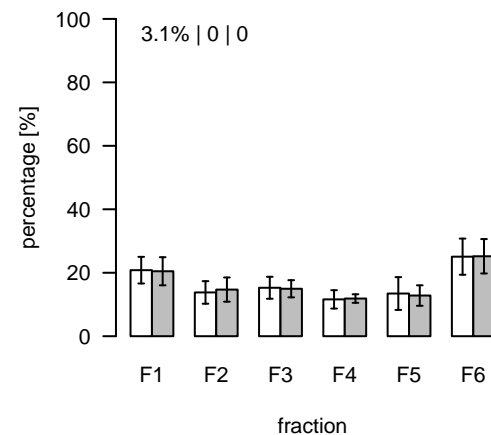

**L151 (m/z=828.543343; rt=3.6615)**  
T/S Cluster: L-3.7-10

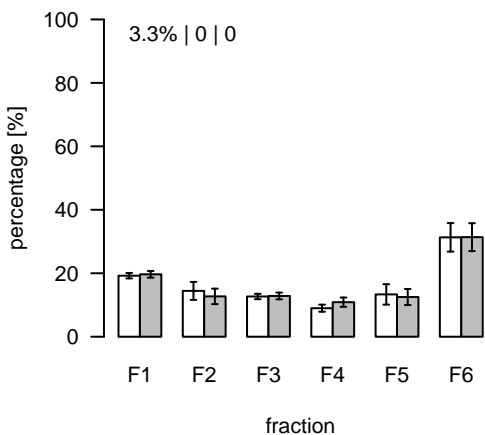

**L152 (m/z=980.623051; rt=3.66504)**  
T/S Cluster: L-3.7-11

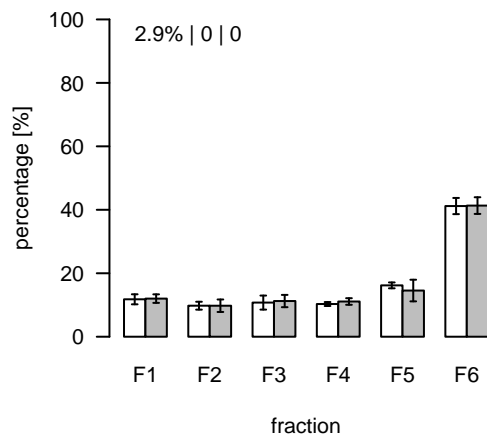

**L153 (m/z=981.626353; rt=3.66593)**  
T/S Cluster: L-3.7-12

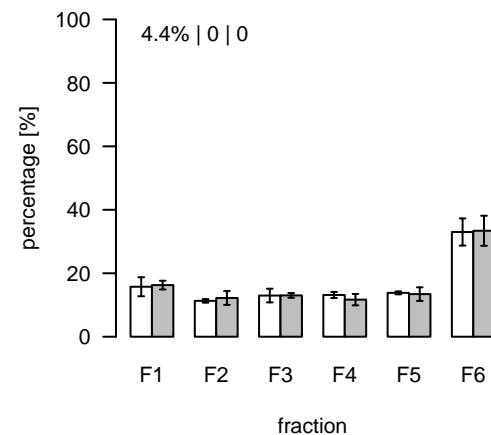



**L154 (m/z=847.478578; rt=3.66853)**  
T/S Cluster: L-3.7-13

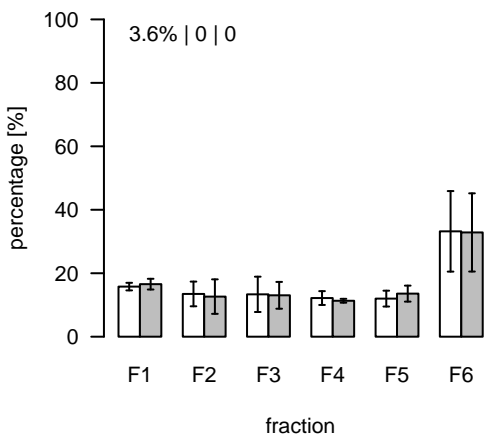

**L159 (m/z=666.436865; rt=3.67489)**  
T/S Cluster: L-3.7-14

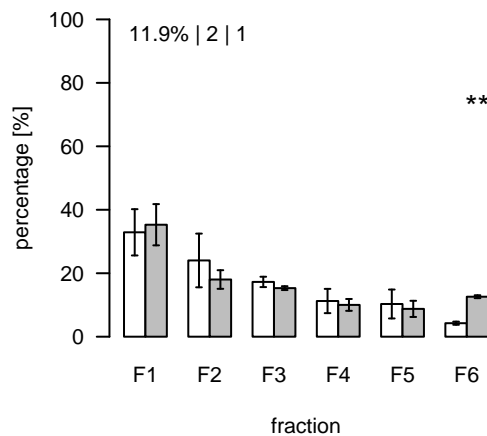

**L162 (m/z=667.441206; rt=3.67492)**  
T/S Cluster: L-3.7-14

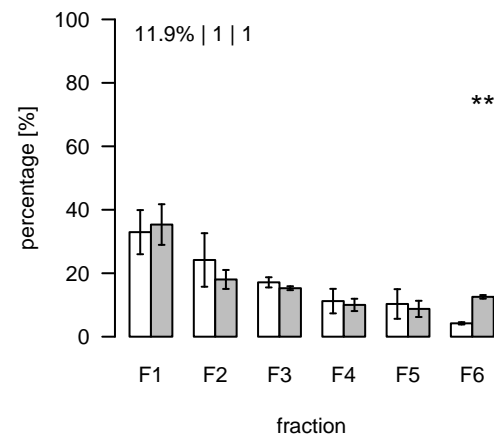

**L158 (m/z=666.403687; rt=3.67489)**  
T/S Cluster: L-3.7-14

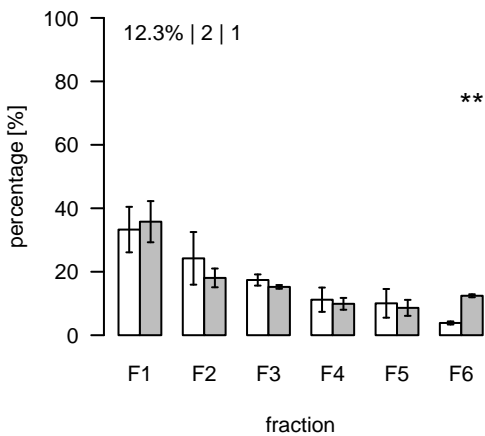

**L163 (m/z=667.418171; rt=3.67498)**  
T/S Cluster: L-3.7-14

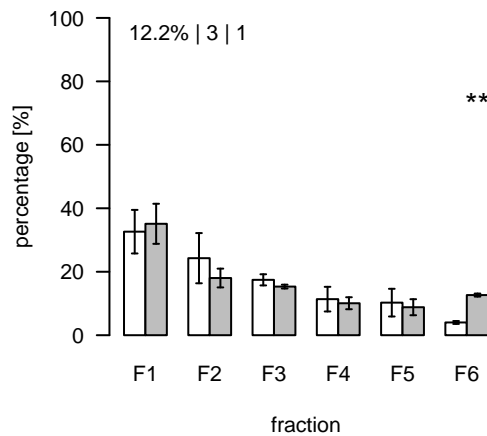

**L164 (m/z=333.2191; rt=3.67498)**  
T/S Cluster: L-3.7-14

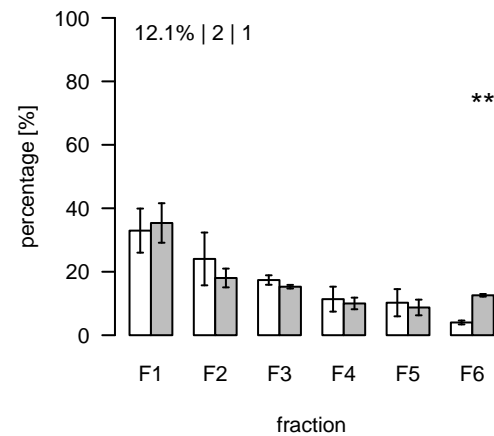

**L160 (m/z=668.444418; rt=3.6749)**  
T/S Cluster: L-3.7-14

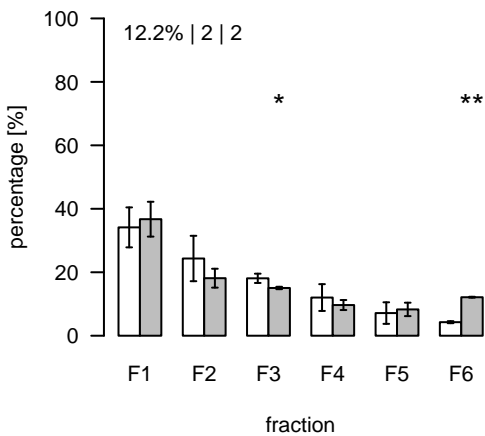

**L161 (m/z=668.423692; rt=3.67491)**  
T/S Cluster: L-3.7-14

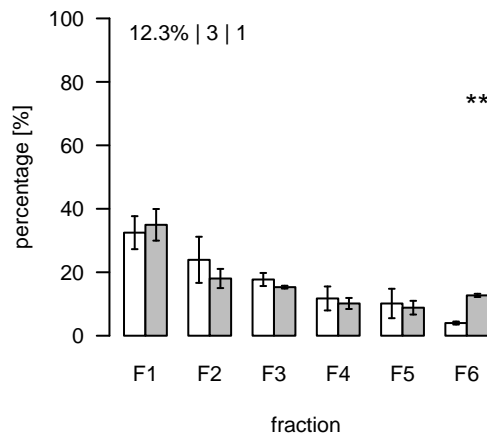

**L157 (m/z=333.721047; rt=3.67488)**  
T/S Cluster: L-3.7-14

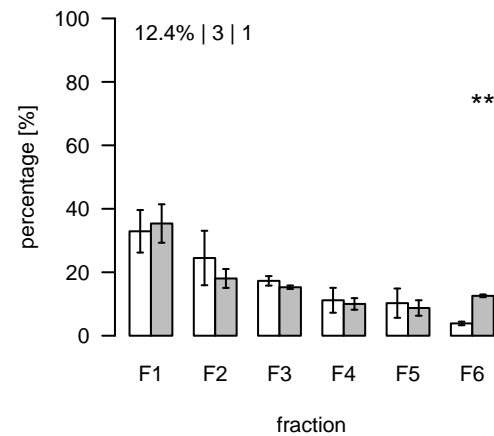

**L156 (m/z=222.148424; rt=3.67485)**  
T/S Cluster: L-3.7-14

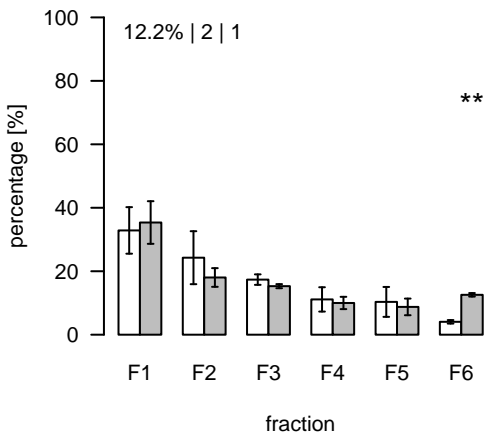

**L165 (m/z=688.42026; rt=3.6753)**  
T/S Cluster: L-3.7-14

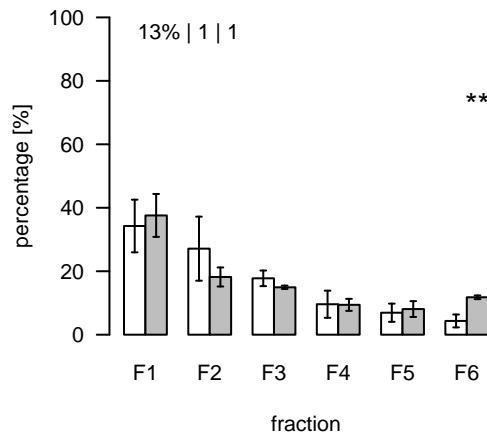

**L167 (m/z=688.439982; rt=3.67712)**  
T/S Cluster: L-3.7-14

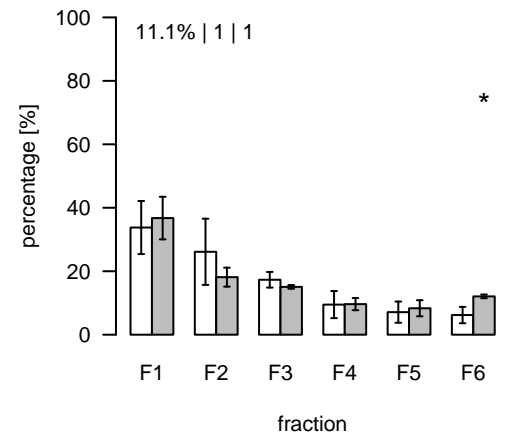

**L182 (m/z=803.533347; rt=3.69832)**  
T/S Cluster: L-3.7-14

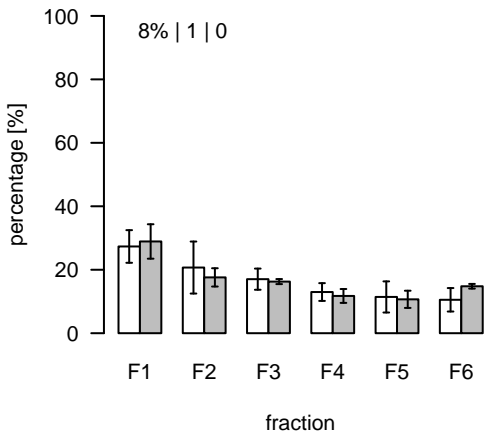

**L181 (m/z=803.52035; rt=3.69823)**  
T/S Cluster: L-3.7-14

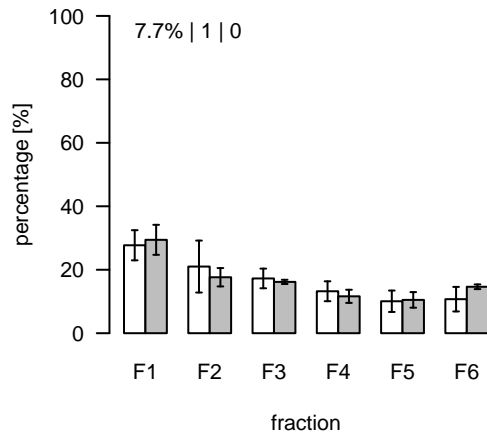

**L155 (m/z=222.144679; rt=3.67454)**  
T/S Cluster: L-3.7-14

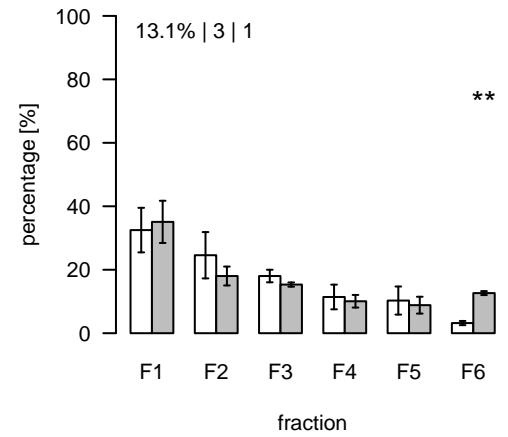

**L166 (m/z=834.516117; rt=3.67666)**  
T/S Cluster: L-3.7-15

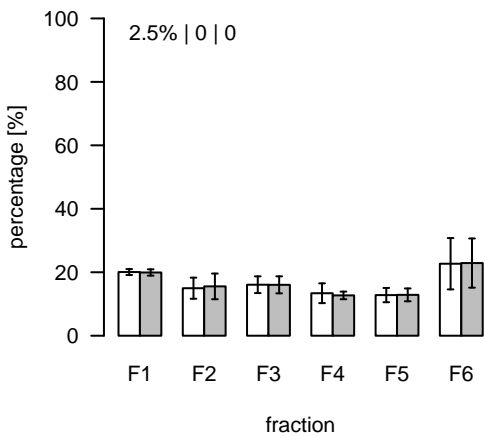

**L168 (m/z=711.49339; rt=3.6777)**  
T/S Cluster: L-3.7-16

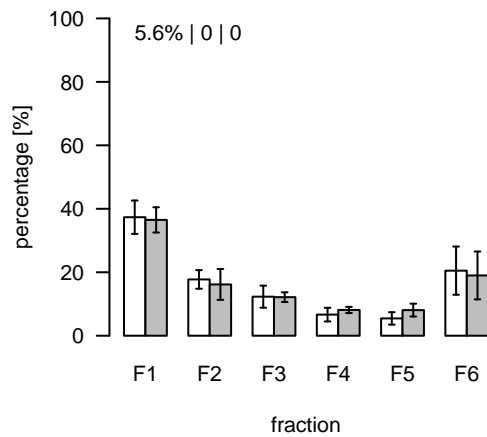

**L171 (m/z=712.495596; rt=3.68706)**  
T/S Cluster: L-3.7-16

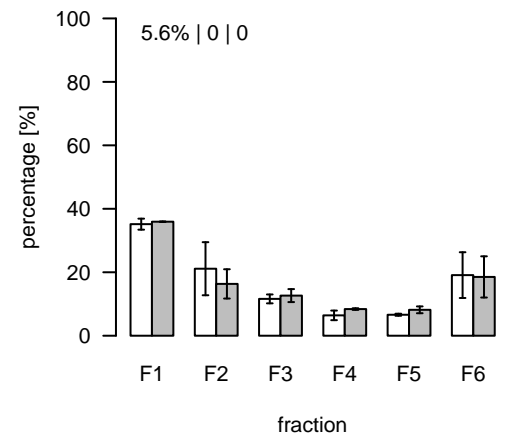

**L183 (m/z=710.451681; rt=3.70975)**  
T/S Cluster: L-3.7-17

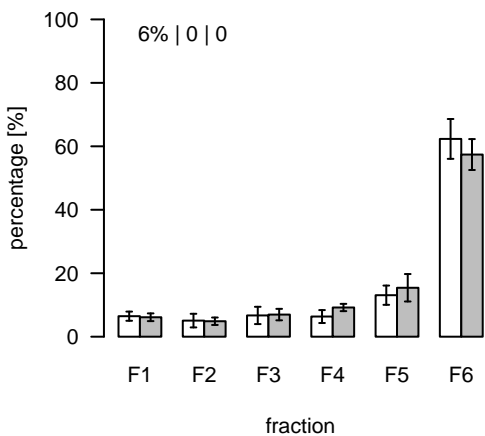

**L184 (m/z=710.426205; rt=3.71046)**  
T/S Cluster: L-3.7-17

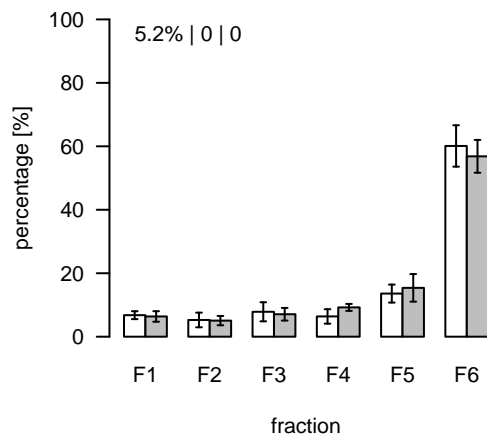

**L185 (m/z=686.450653; rt=3.72545)**  
T/S Cluster: L-3.7-17

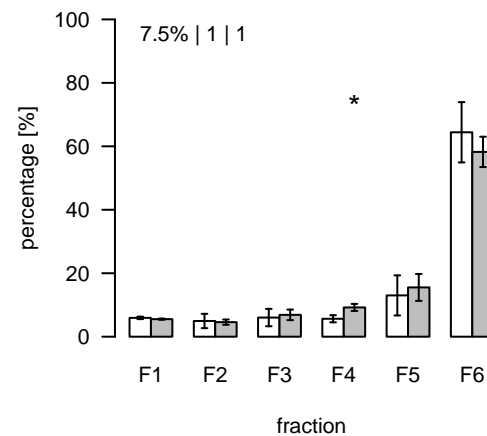

**L172 (m/z=846.481626; rt=3.68801)**  
T/S Cluster: L-3.7-17

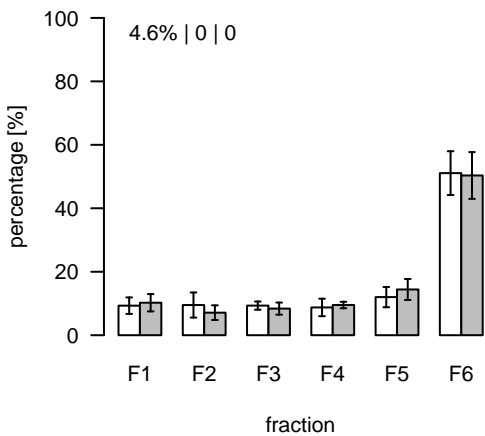

**L175 (m/z=810.504213; rt=3.69195)**  
T/S Cluster: L-3.7-17

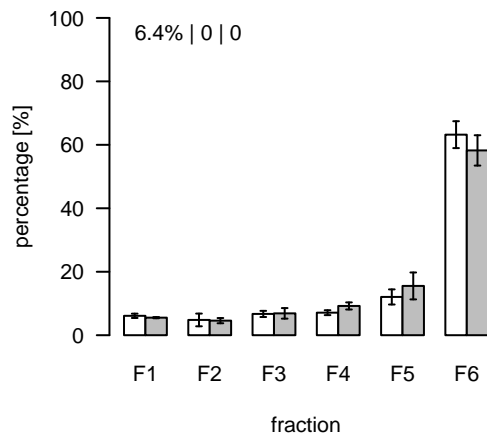

**L173 (m/z=838.537352; rt=3.68912)**  
T/S Cluster: L-3.7-17

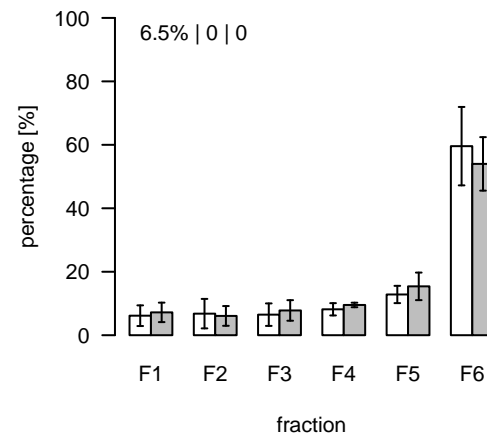

**L169 (m/z=847.517056; rt=3.67854)**  
T/S Cluster: L-3.7-17

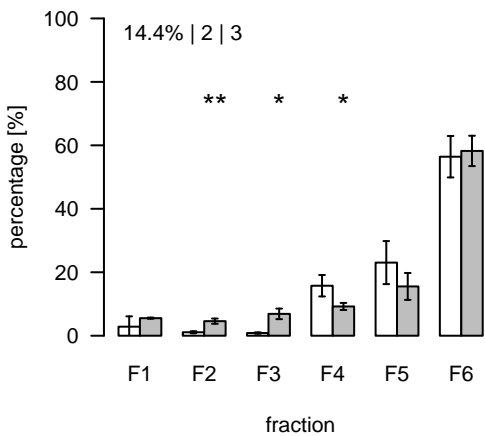

**L170 (m/z=846.529389; rt=3.68132)**  
T/S Cluster: L-3.7-18

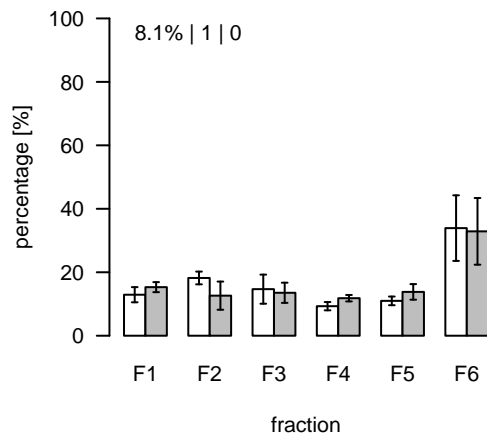

**L174 (m/z=492.3258; rt=3.69114)**  
T/S Cluster: L-3.7-19

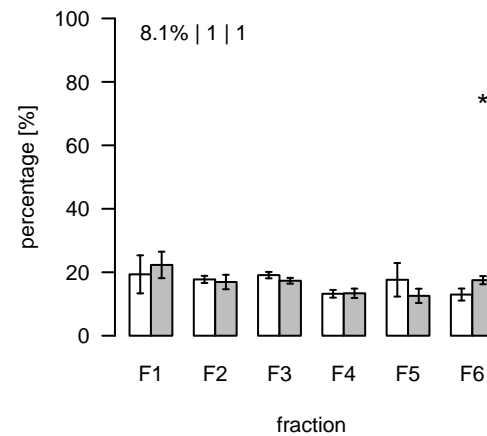

**L176 (m/z=664.458165; rt=3.69313)**  
T/S Cluster: L-3.7-20

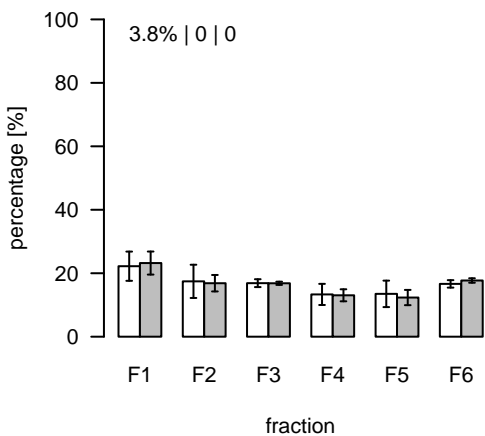

**L180 (m/z=711.462214; rt=3.69729)**  
T/S Cluster: L-3.7-21

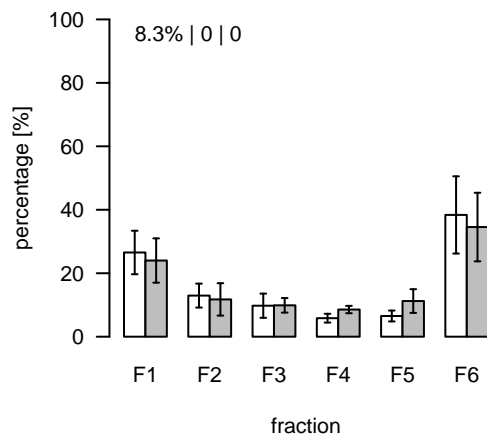

**L187 (m/z=712.466158; rt=3.74248)**  
T/S Cluster: L-3.7-21

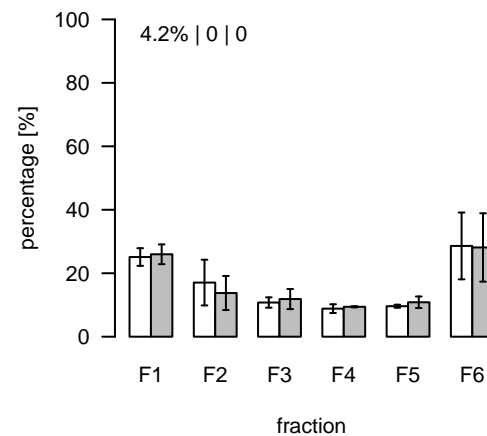

**L188 (m/z=694.46873; rt=3.7429)**  
T/S Cluster: L-3.7-22

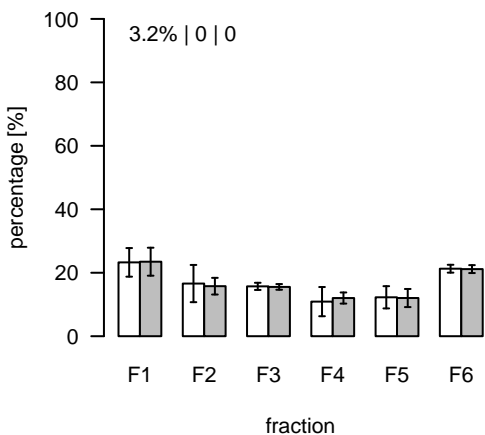

**L186 (m/z=695.471953; rt=3.74089)**  
T/S Cluster: L-3.7-22

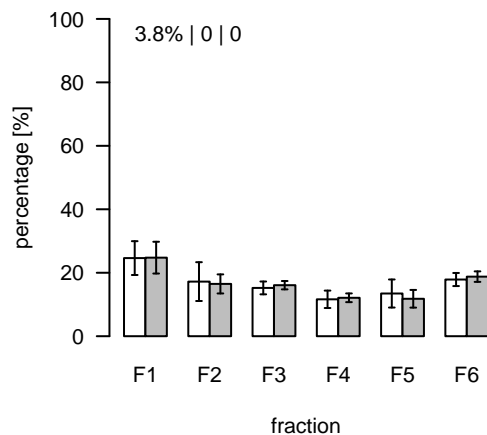

**L190 (m/z=820.537386; rt=3.75144)**  
T/S Cluster: L-3.8-1

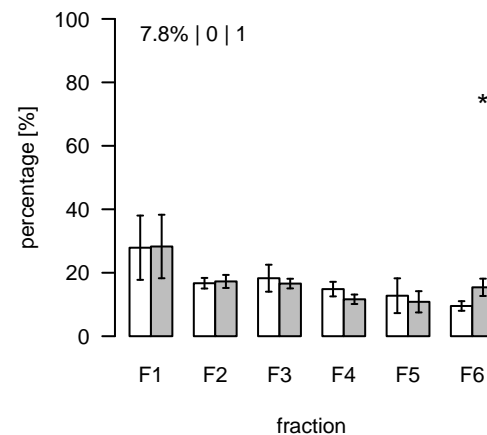

**L191 (m/z=820.538275; rt=3.75155)**  
T/S Cluster: L-3.8-1

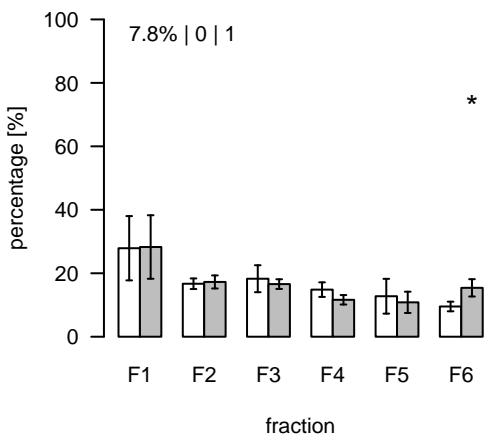

**L192 (m/z=802.507671; rt=3.75994)**  
T/S Cluster: L-3.8-2

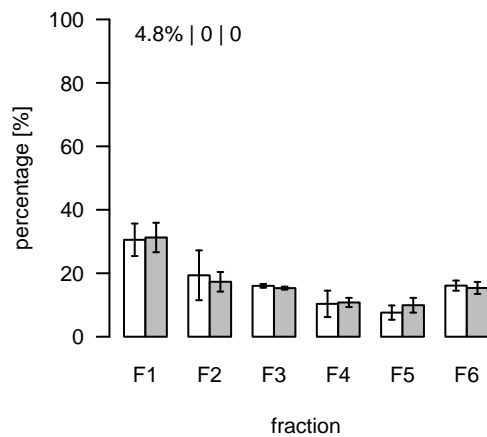

**L193 (m/z=700.458486; rt=3.76187)**  
T/S Cluster: L-3.8-3

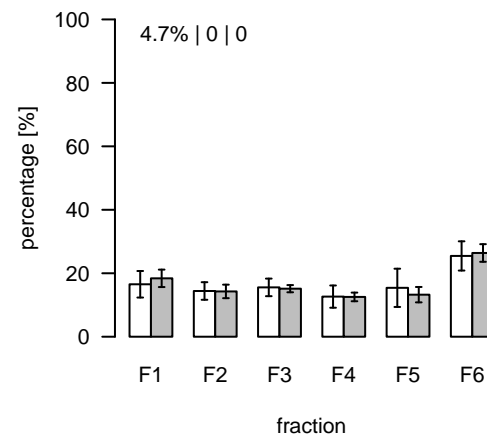

**L196 (m/z=804.54208; rt=3.77678)**  
T/S Cluster: L-3.8-4

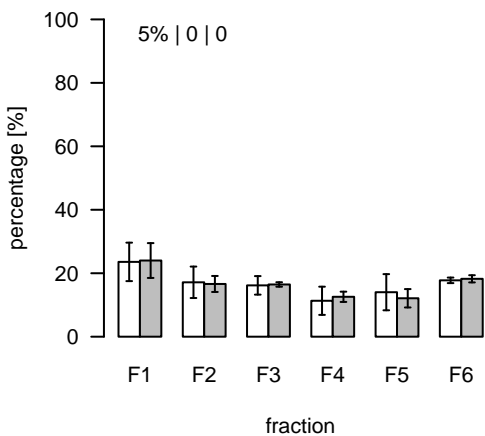

**L197 (m/z=804.546837; rt=3.7768)**  
T/S Cluster: L-3.8-4

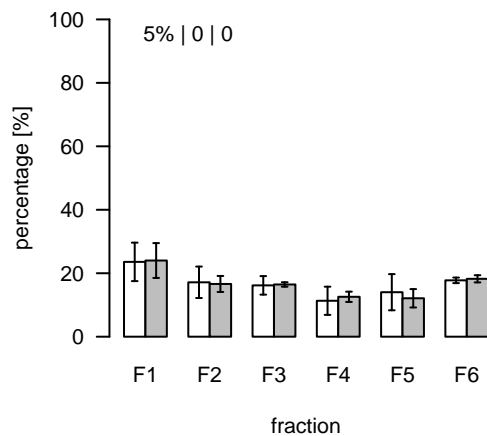

**L194 (m/z=805.545044; rt=3.77635)**  
T/S Cluster: L-3.8-4

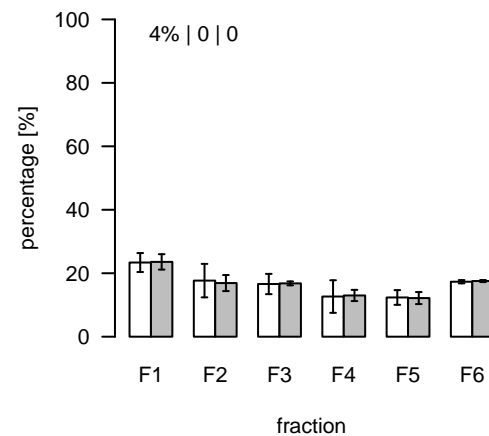

**L195 (m/z=805.550828; rt=3.77637)**  
T/S Cluster: L-3.8-4

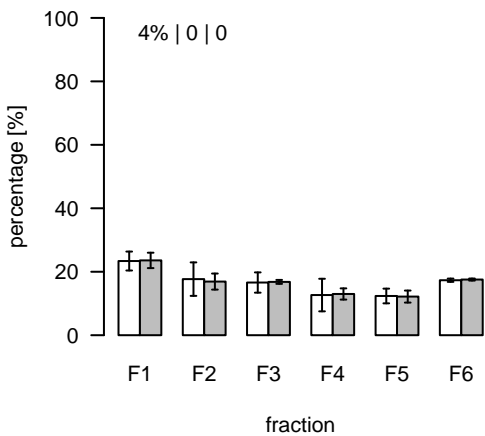

**L207 (m/z=664.457631; rt=3.79771)**  
T/S Cluster: L-3.8-4

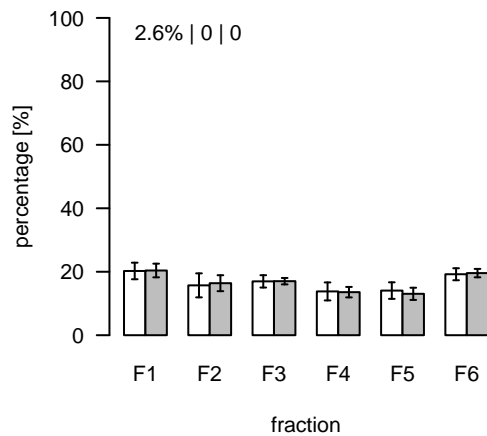

**L217 (m/z=729.424931; rt=3.8397)**  
T/S Cluster: L-3.8-5

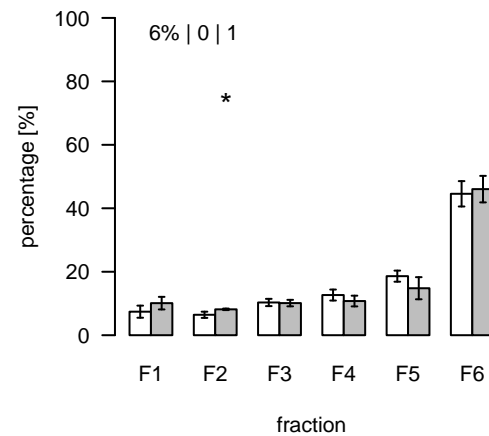

**L218 (m/z=729.414044; rt=3.83972)**  
T/S Cluster: L-3.8-5

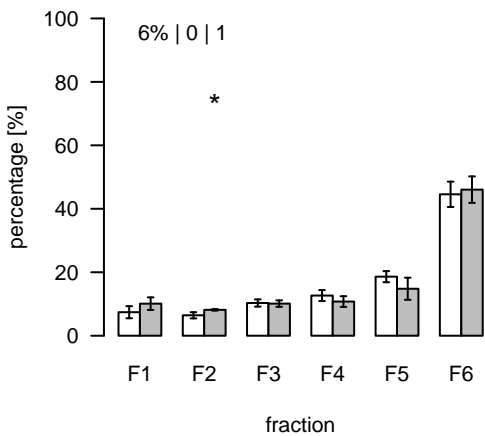

**L216 (m/z=724.467184; rt=3.83772)**  
T/S Cluster: L-3.8-5

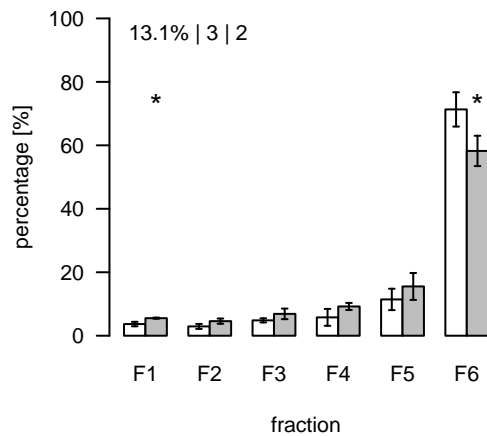

**L214 (m/z=724.43977; rt=3.83764)**  
T/S Cluster: L-3.8-5

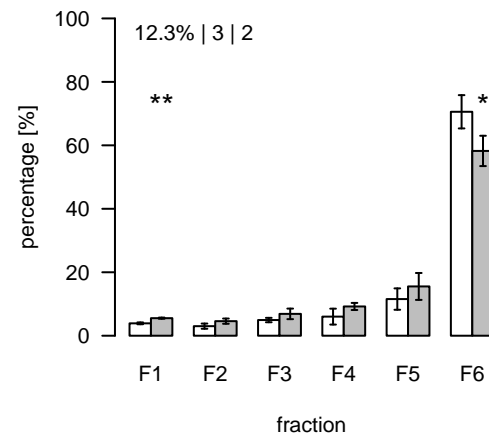

**L215 (m/z=725.470861; rt=3.83766)**  
T/S Cluster: L-3.8-5

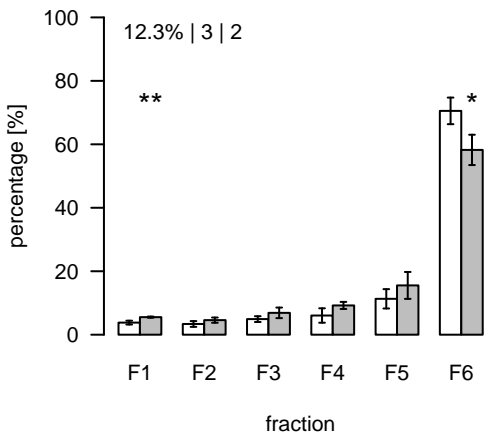

**L213 (m/z=725.445964; rt=3.83758)**  
T/S Cluster: L-3.8-5

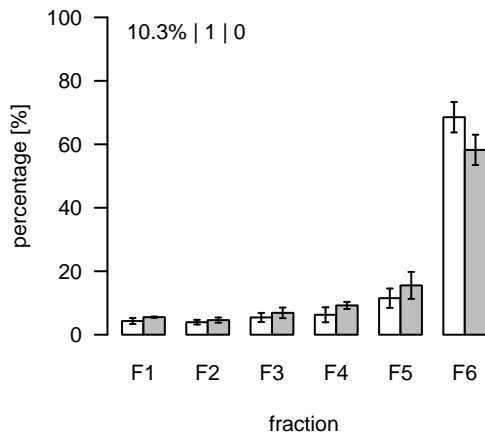

**L222 (m/z=792.494005; rt=3.84578)**  
T/S Cluster: L-3.8-5

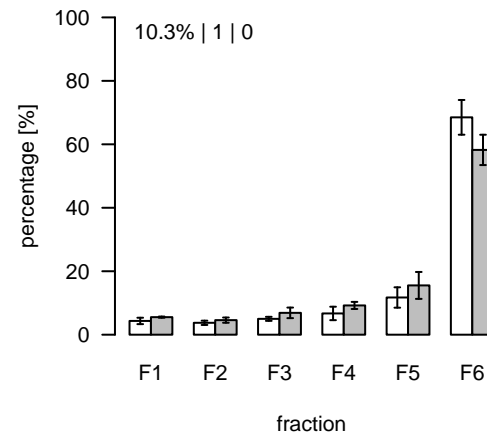

**L199 (m/z=796.525249; rt=3.78876)**  
T/S Cluster: L-3.8-5

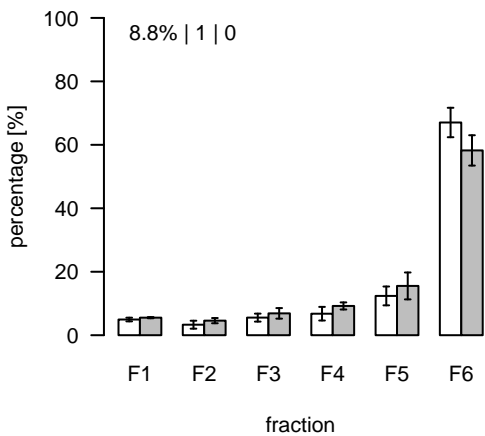

**L198 (m/z=796.486399; rt=3.78858)**  
T/S Cluster: L-3.8-5

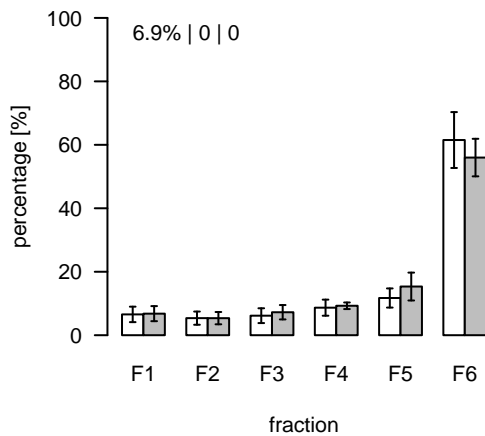

**L219 (m/z=730.423129; rt=3.84015)**  
T/S Cluster: L-3.8-5

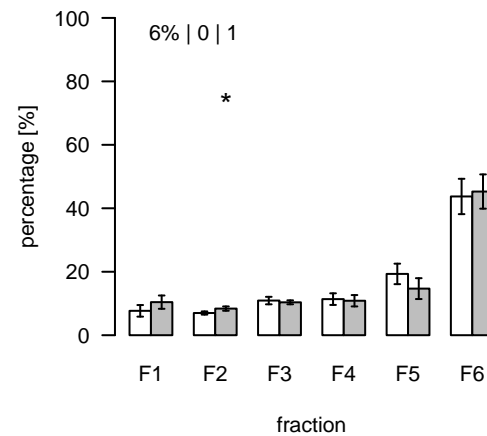

**L212 (m/z=730.445864; rt=3.83337)**  
T/S Cluster: L-3.8-5

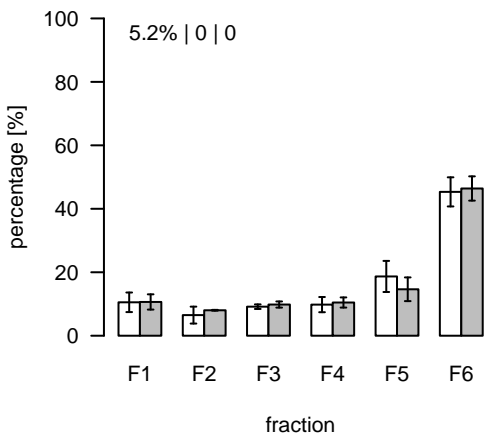

**L220 (m/z=900.541573; rt=3.84179)**  
T/S Cluster: L-3.8-5

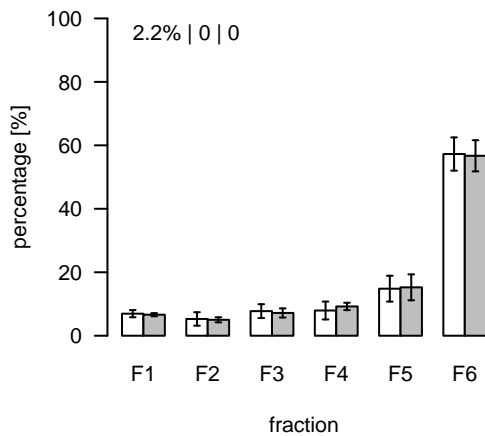

**L221 (m/z=900.515985; rt=3.84208)**  
T/S Cluster: L-3.8-5

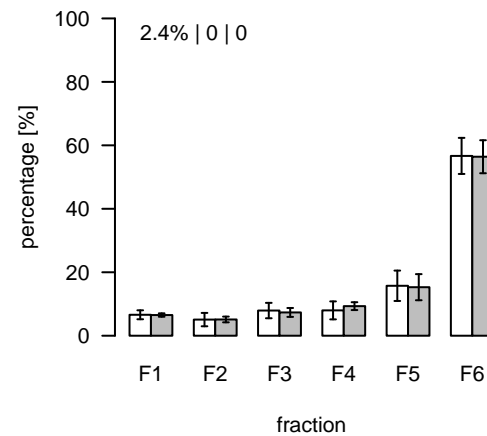

**L200 (m/z=801.480947; rt=3.79127)**  
T/S Cluster: L-3.8-5

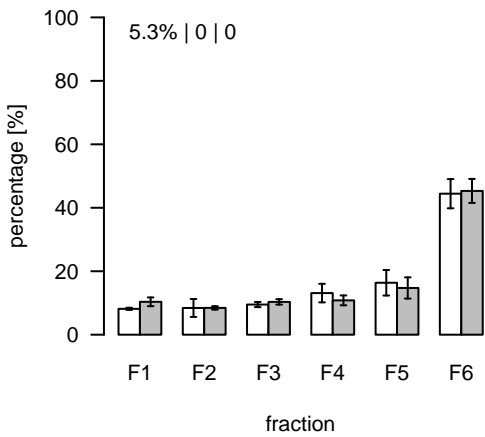

**L201 (m/z=801.485579; rt=3.79138)**  
T/S Cluster: L-3.8-5

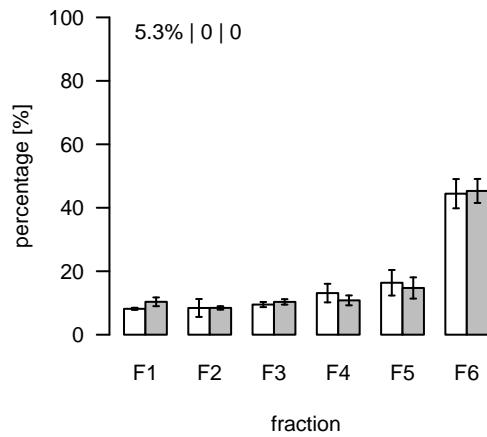

**L202 (m/z=980.622645; rt=3.79202)**  
T/S Cluster: L-3.8-6

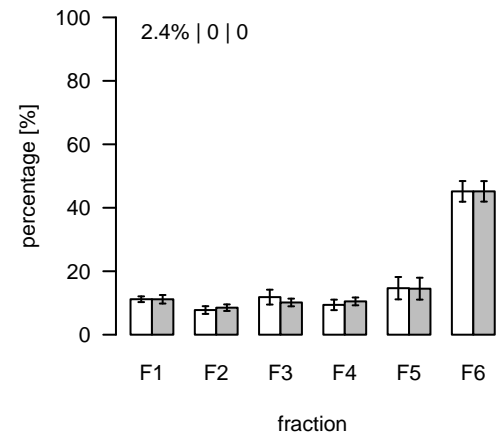

**L210 (m/z=704.452789; rt=3.81579)**  
T/S Cluster: L-3.8-7

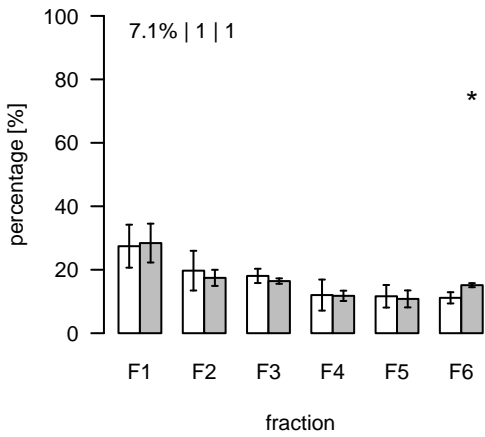

**L206 (m/z=692.456226; rt=3.79458)**  
T/S Cluster: L-3.8-7

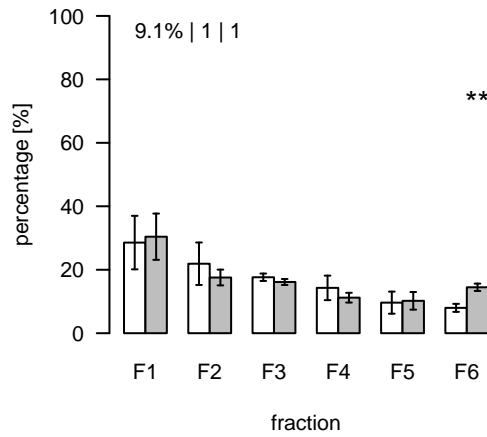

**L205 (m/z=692.439492; rt=3.7942)**  
T/S Cluster: L-3.8-7

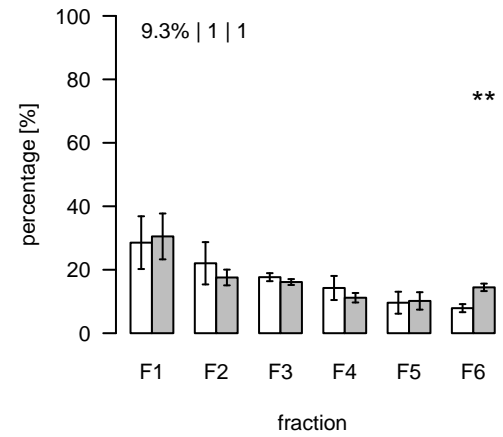

**L209 (m/z=705.456299; rt=3.81524)**  
T/S Cluster: L-3.8-7

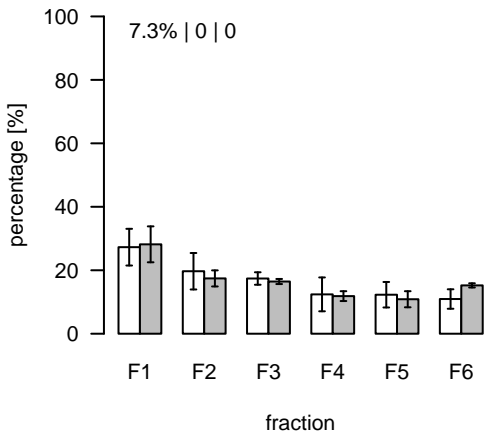

**L211 (m/z=704.425208; rt=3.81637)**  
T/S Cluster: L-3.8-7

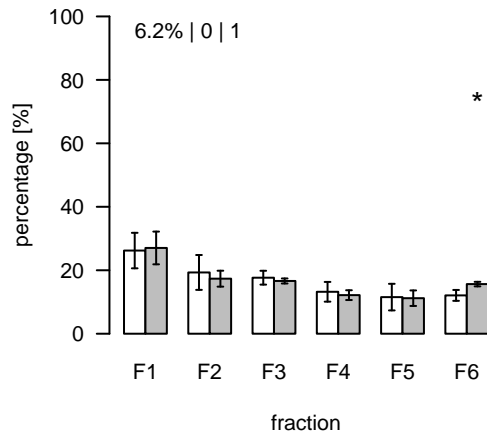

**L204 (m/z=693.458873; rt=3.79368)**  
T/S Cluster: L-3.8-7

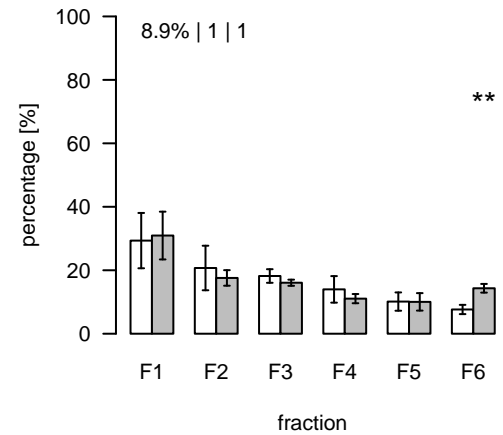

**L203 (m/z=693.441276; rt=3.79343)**  
T/S Cluster: L-3.8-7

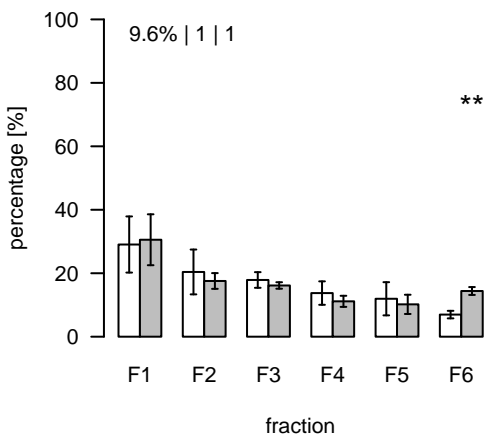

**L208 (m/z=830.559859; rt=3.8027)**  
T/S Cluster: L-3.8-8

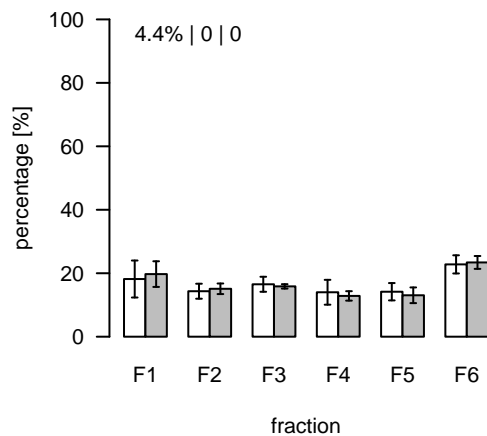

**L224 (m/z=636.428571; rt=3.86146)**  
T/S Cluster: L-3.9-1

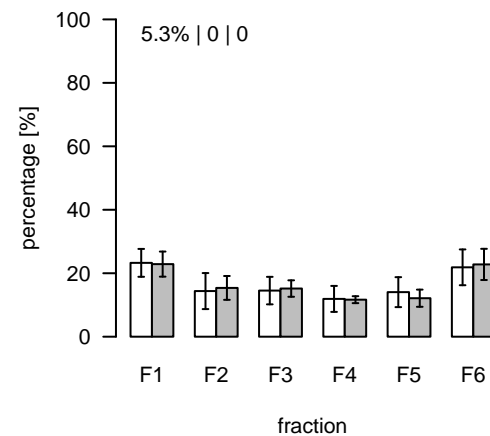

**L225 (m/z=636.413409; rt=3.86152)**  
T/S Cluster: L-3.9-1

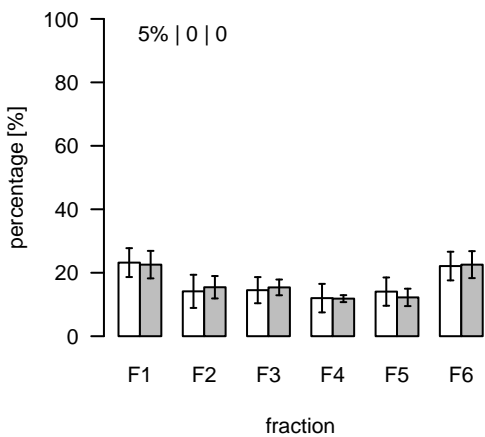

**L223 (m/z=637.430267; rt=3.86054)**  
T/S Cluster: L-3.9-1

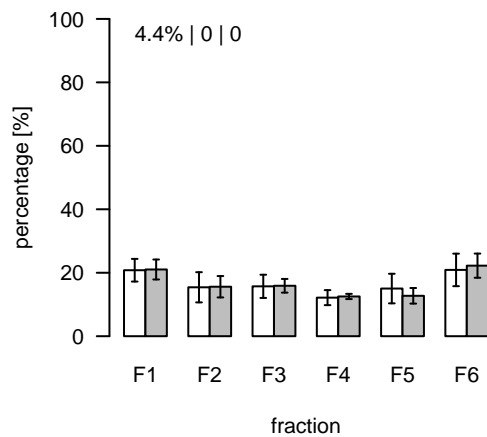

**L226 (m/z=812.561642; rt=3.86204)**  
T/S Cluster: L-3.9-2

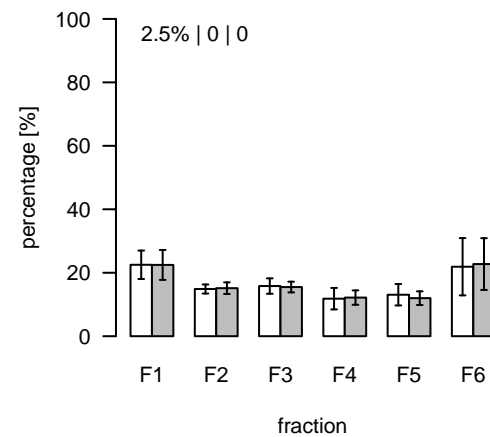

**L227 (m/z=702.472228; rt=3.86449)**  
T/S Cluster: L-3.9-3

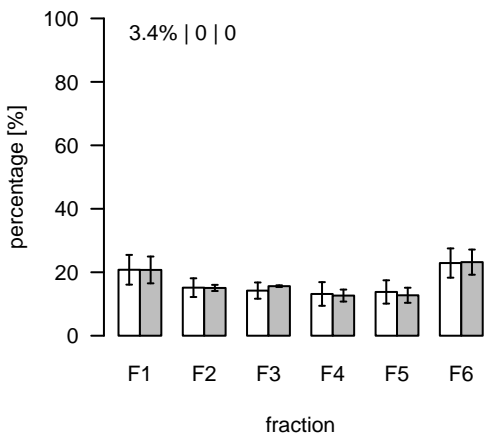

**L228 (m/z=702.473626; rt=3.86527)**  
T/S Cluster: L-3.9-3

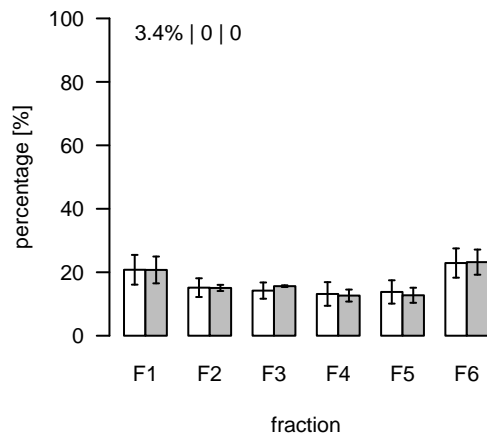

**L229 (m/z=803.52065; rt=3.87461)**  
T/S Cluster: L-3.9-4

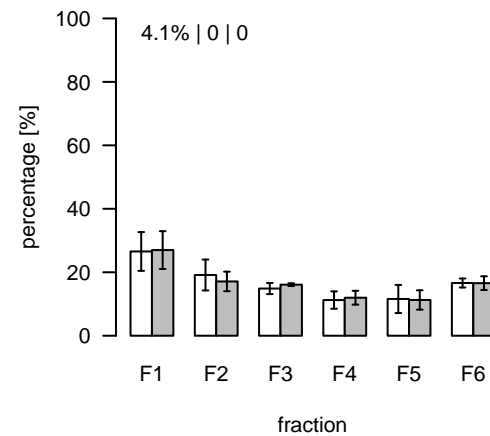



**L230 (m/z=803.532361; rt=3.87479)**  
T/S Cluster: L-3.9-4

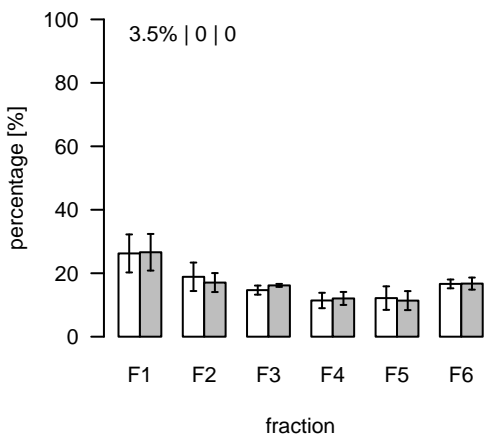

**L232 (m/z=810.508967; rt=3.90109)**  
T/S Cluster: L-3.9-5

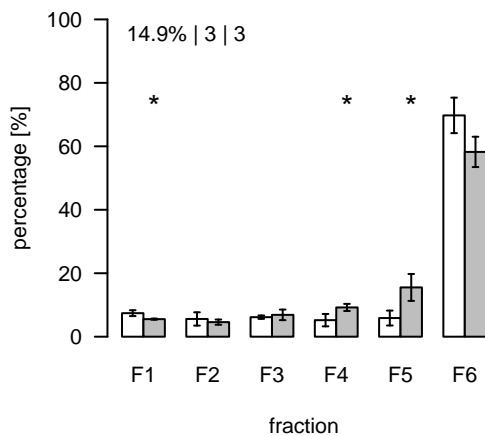

**L231 (m/z=811.512457; rt=3.8994)**  
T/S Cluster: L-3.9-5

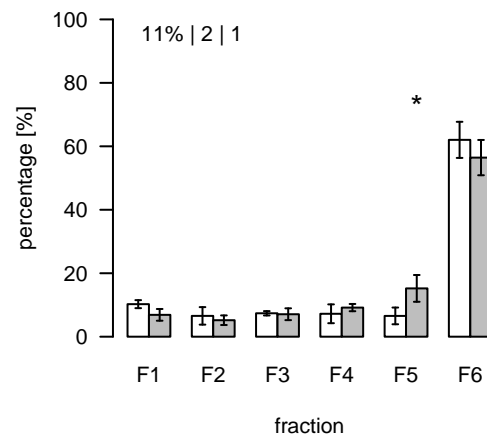

**L235 (m/z=680.452785; rt=3.90662)**  
T/S Cluster: L-3.9-6

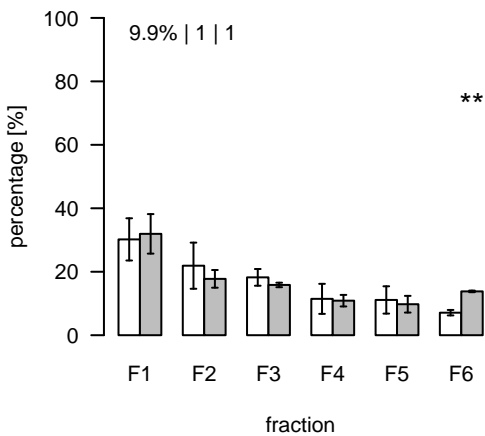

**L233 (m/z=680.434786; rt=3.90204)**  
T/S Cluster: L-3.9-6

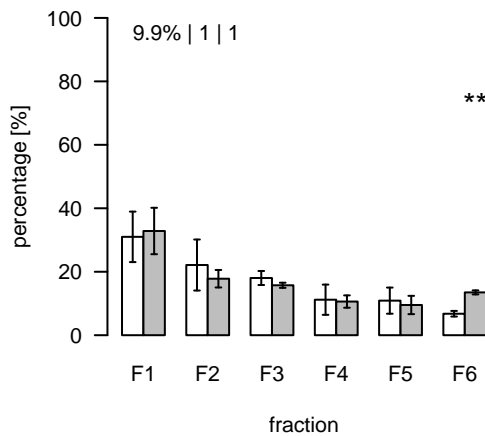

**L246 (m/z=729.414068; rt=3.94035)**  
T/S Cluster: L-3.9-7

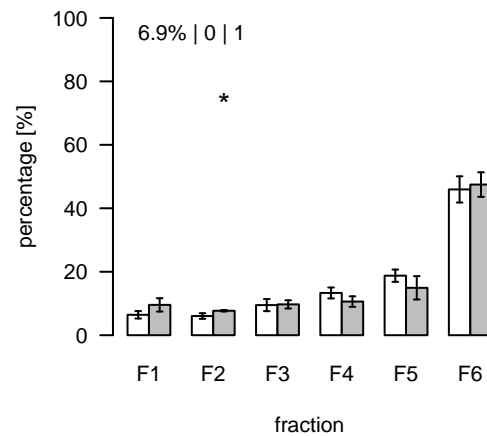

**L247 (m/z=729.424936; rt=3.94037)**  
T/S Cluster: L-3.9-7

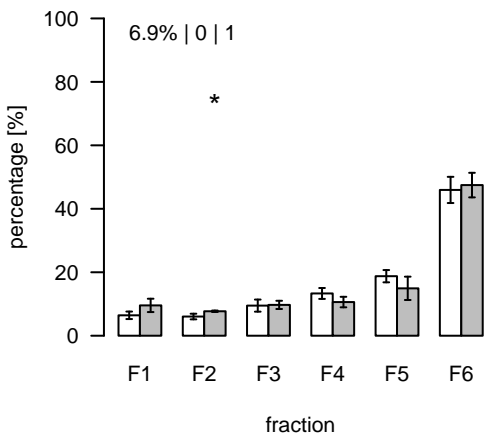

**L244 (m/z=724.467471; rt=3.93953)**  
T/S Cluster: L-3.9-7

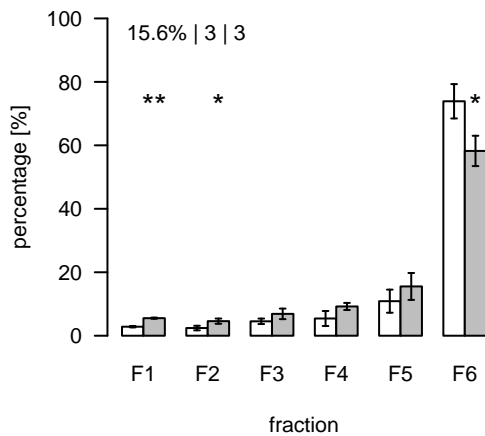

**L245 (m/z=730.431491; rt=3.93983)**  
T/S Cluster: L-3.9-7

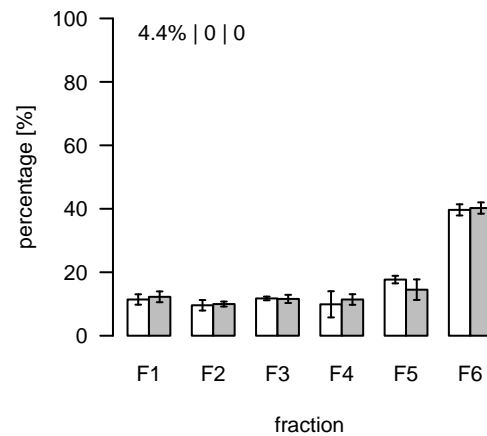

**L248 (m/z=730.460669; rt=3.94182)**  
T/S Cluster: L-3.9-7

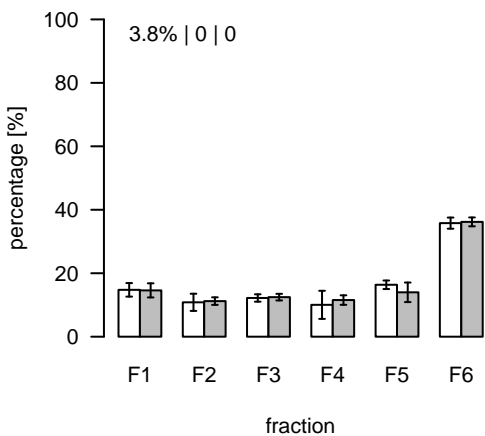

**L243 (m/z=724.439725; rt=3.93951)**  
T/S Cluster: L-3.9-7

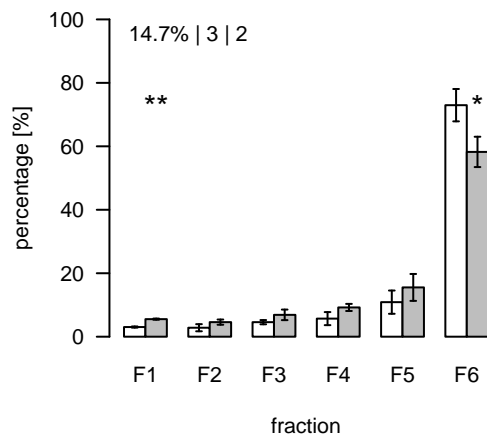

**L242 (m/z=725.470915; rt=3.93938)**  
T/S Cluster: L-3.9-7

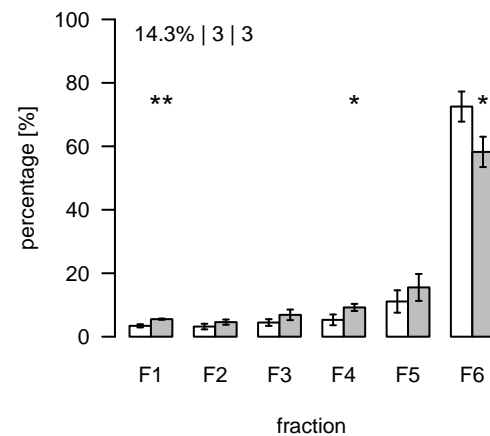

**L238 (m/z=824.558649; rt=3.92389)**  
T/S Cluster: L-3.9-7

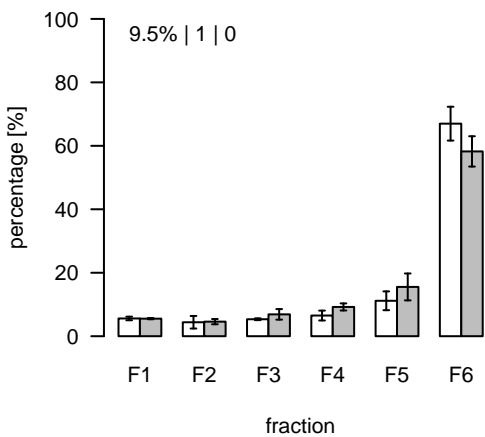

**L241 (m/z=725.445937; rt=3.9393)**  
T/S Cluster: L-3.9-7

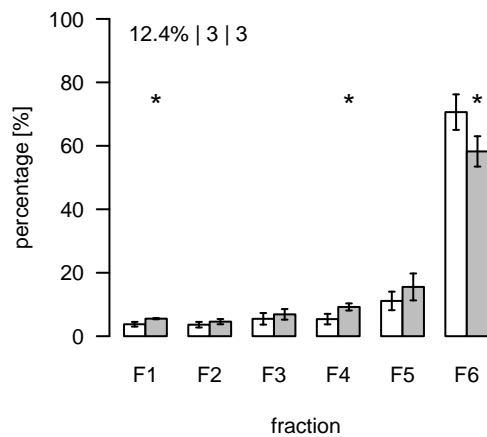

**L234 (m/z=824.535125; rt=3.90399)**  
T/S Cluster: L-3.9-7

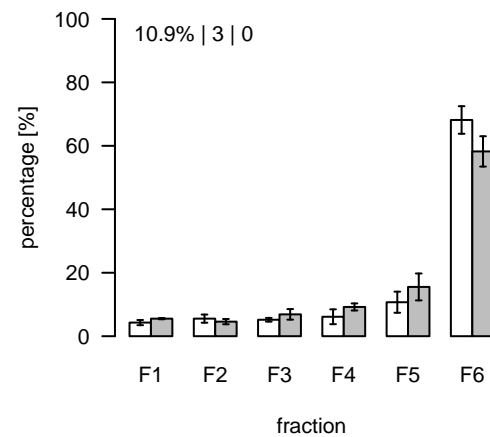

**L240 (m/z=986.612184; rt=3.93574)**  
T/S Cluster: L-3.9-7

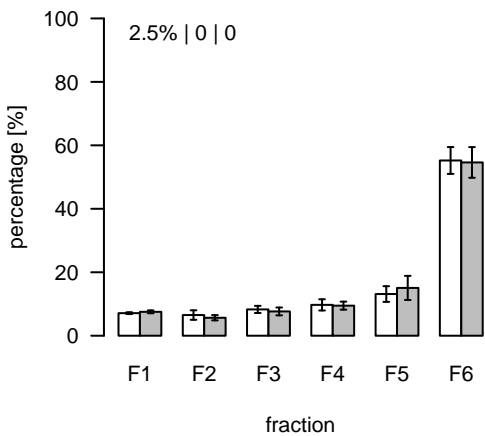

**L239 (m/z=986.586679; rt=3.93529)**  
T/S Cluster: L-3.9-7

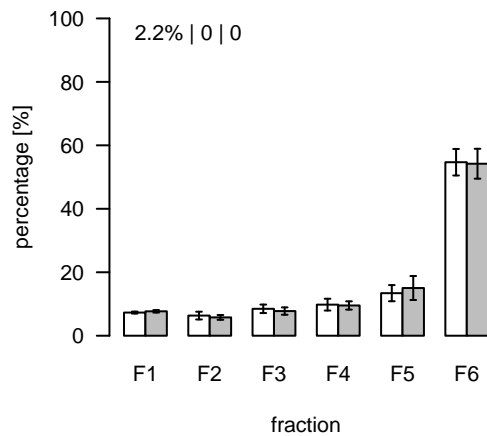

**L236 (m/z=818.512864; rt=3.91806)**  
T/S Cluster: L-3.9-8

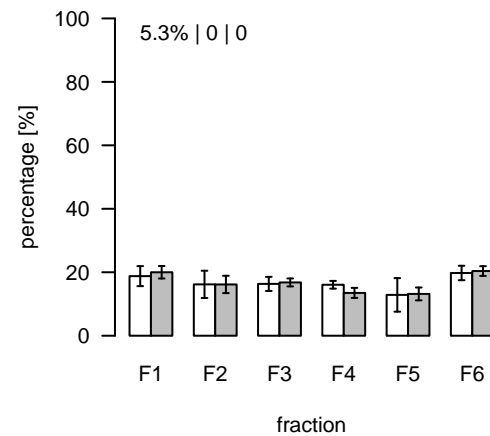

**L237 (m/z=818.530929; rt=3.91819)**  
T/S Cluster: L-3.9-8

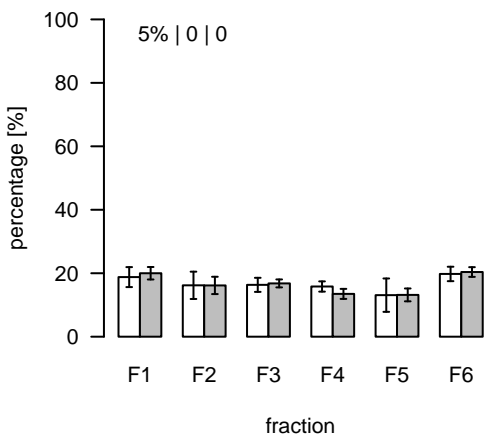

**L251 (m/z=326.378879; rt=3.94271)**  
T/S Cluster: L-3.9-9

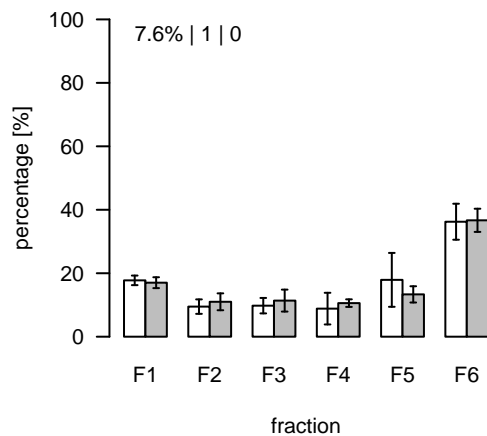

**L252 (m/z=326.373085; rt=3.94277)**  
T/S Cluster: L-3.9-9

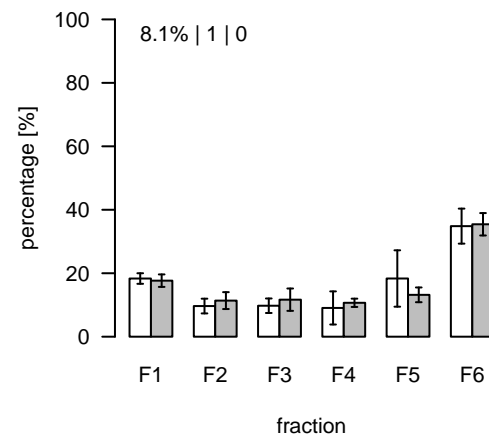

**L250 (m/z=327.382842; rt=3.94246)**  
T/S Cluster: L-3.9-9

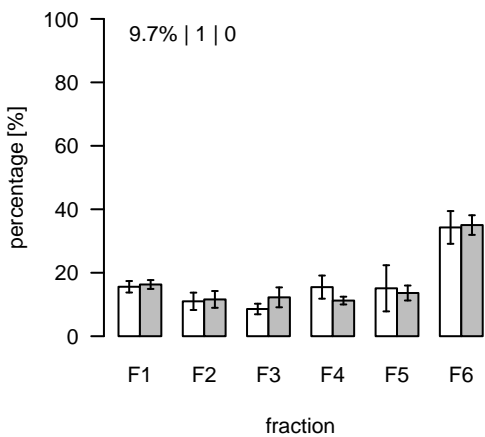

**L249 (m/z=327.379619; rt=3.94241)**  
T/S Cluster: L-3.9-9

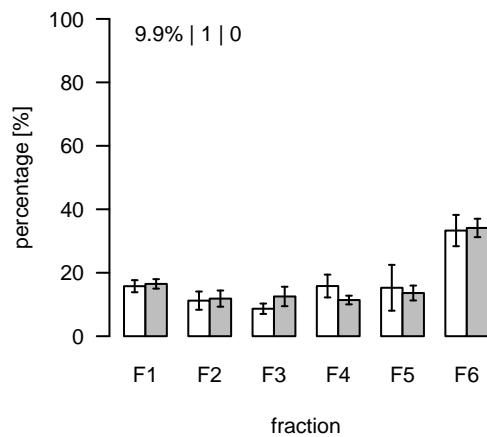

**L253 (m/z=810.553849; rt=3.95474)**  
T/S Cluster: L-4-1

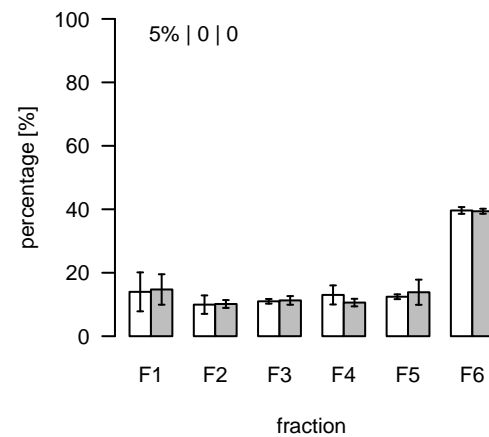

**L258 (m/z=914.555068; rt=3.9859)**  
T/S Cluster: L-4-2

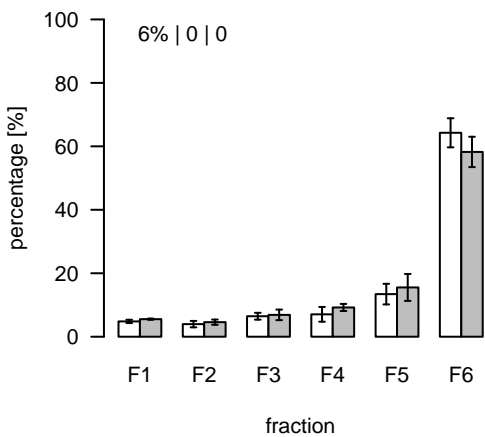

**L259 (m/z=914.537156; rt=3.98597)**  
T/S Cluster: L-4-2

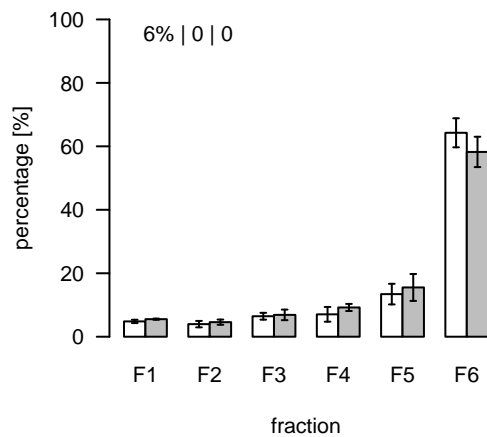

**L264 (m/z=978.6078; rt=4.00658)**  
T/S Cluster: L-4-2

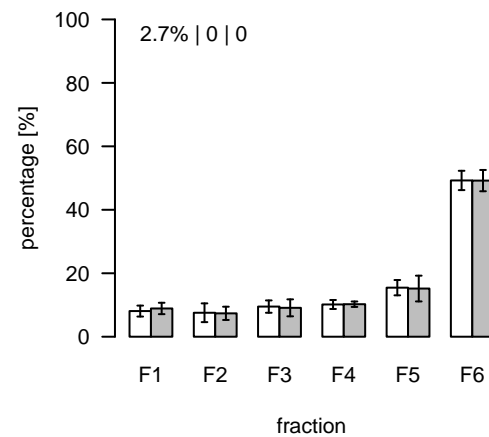

**L265 (m/z=978.584936; rt=4.00674)**  
T/S Cluster: L-4-2

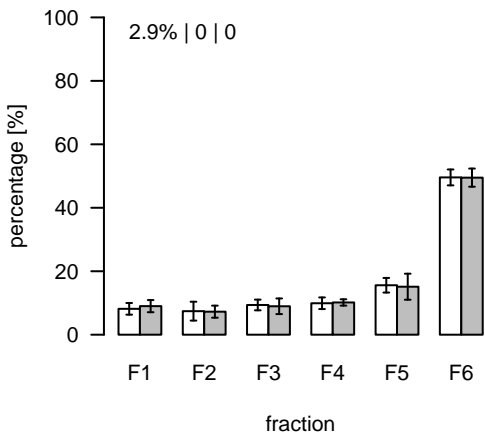

**L254 (m/z=822.542924; rt=3.96203)**  
T/S Cluster: L-4-2

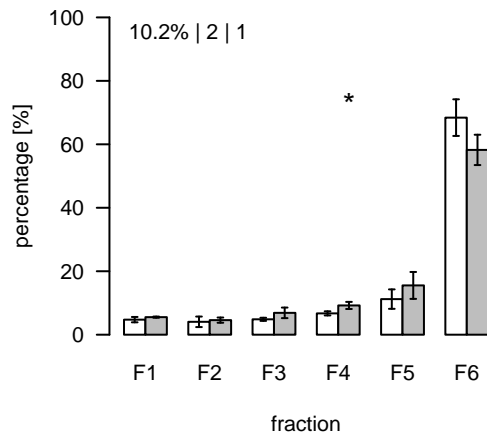

**L262 (m/z=915.561383; rt=3.9881)**  
T/S Cluster: L-4-2

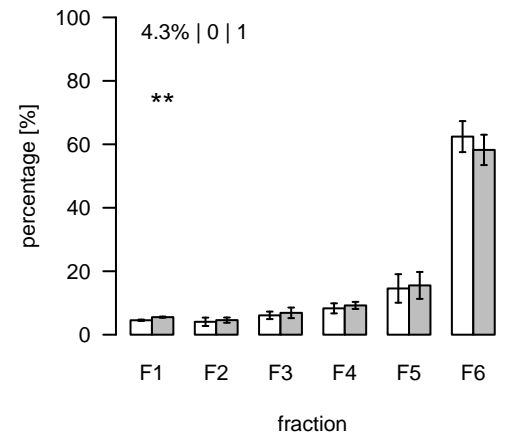

**L263 (m/z=915.534942; rt=3.98812)**  
T/S Cluster: L-4-2

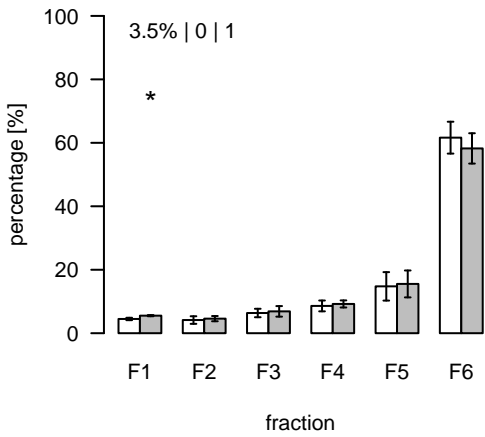

**L255 (m/z=832.505593; rt=3.97429)**  
T/S Cluster: L-4-3

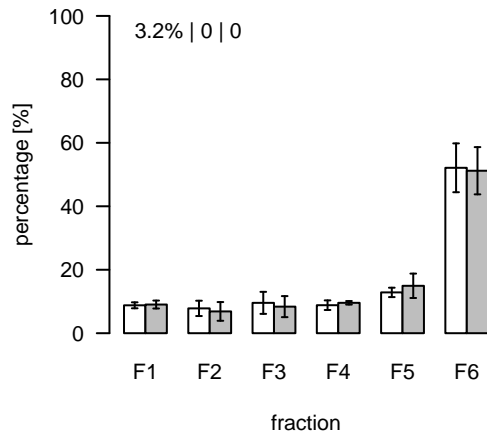

**L257 (m/z=692.452485; rt=3.97751)**  
T/S Cluster: L-4-4

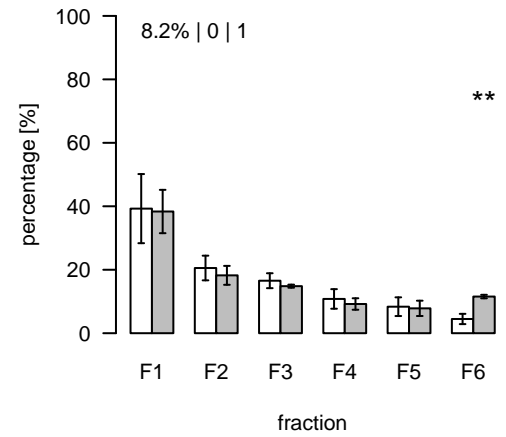

**L256 (m/z=692.439643; rt=3.9774)**  
T/S Cluster: L-4-4

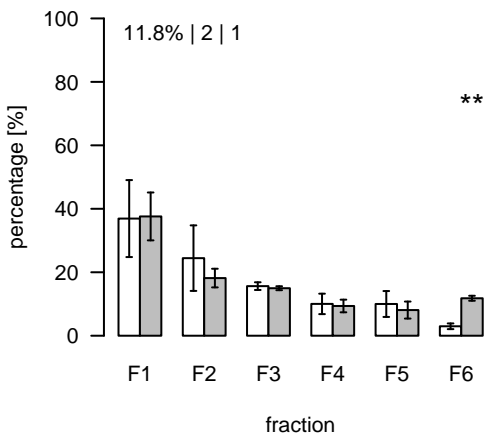

**L261 (m/z=738.4612; rt=3.98668)**  
T/S Cluster: L-4-5

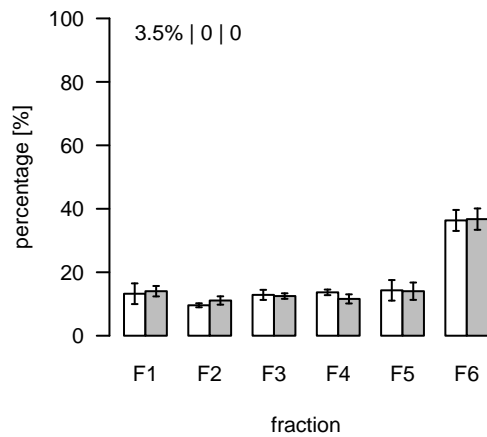

**L260 (m/z=738.474566; rt=3.98614)**  
T/S Cluster: L-4-5

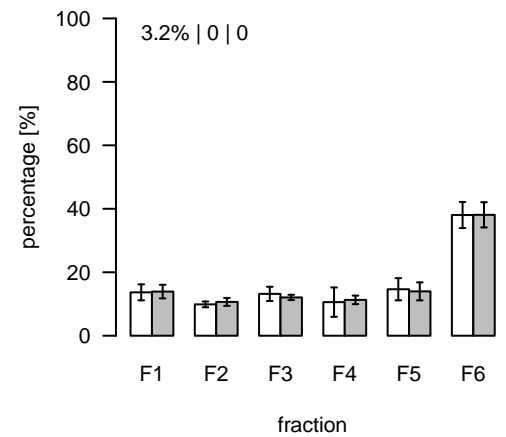

**L266 (m/z=833.576018; rt=4.00771)**  
T/S Cluster: L-4-6

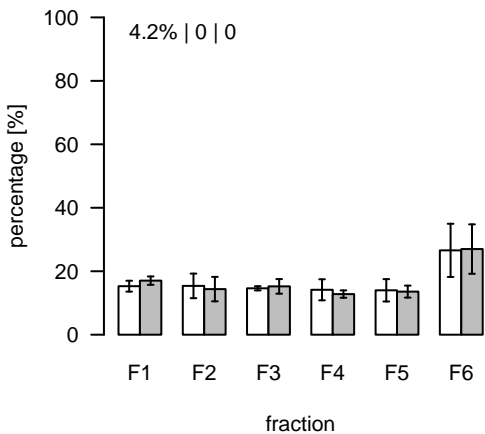

**L267 (m/z=832.575809; rt=4.00906)**  
T/S Cluster: L-4-7

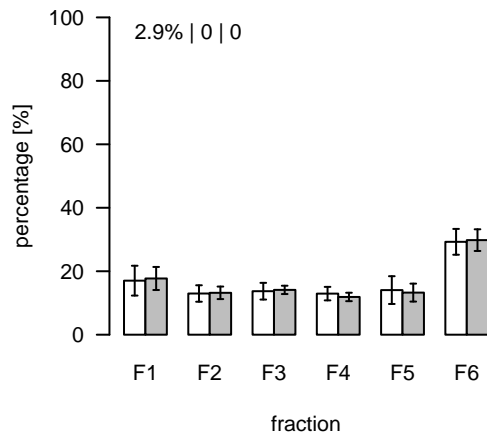

**L269 (m/z=802.527957; rt=4.01565)**  
T/S Cluster: L-4-8

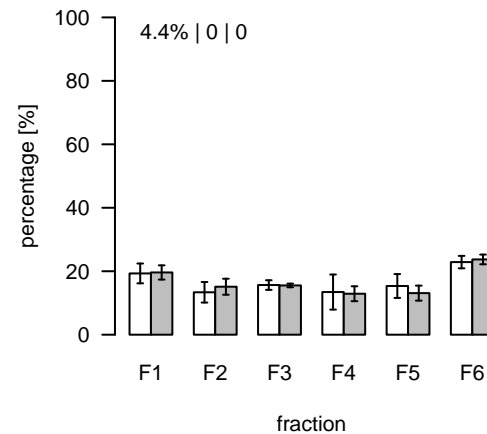

**L270 (m/z=802.490539; rt=4.02609)**  
T/S Cluster: L-4-8

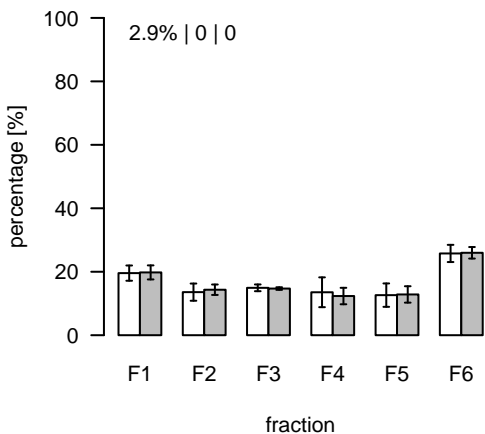

**L268 (m/z=803.531785; rt=4.01483)**  
T/S Cluster: L-4-8

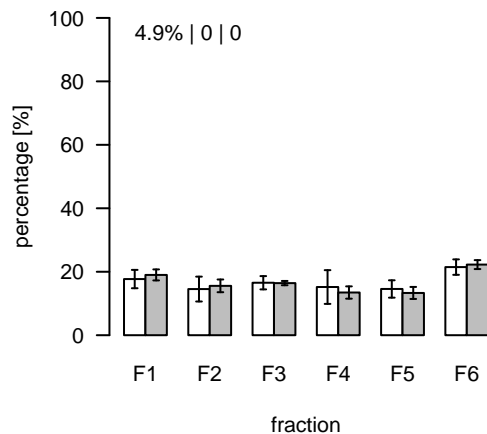

**L271 (m/z=804.553755; rt=4.03316)**  
T/S Cluster: L-4-9

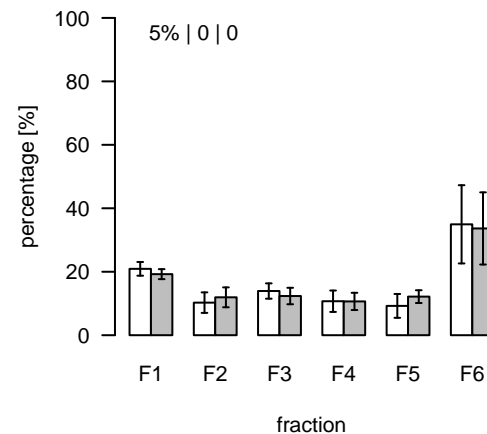

**L272 (m/z=826.524257; rt=4.05438)**  
T/S Cluster: L-4.1-1

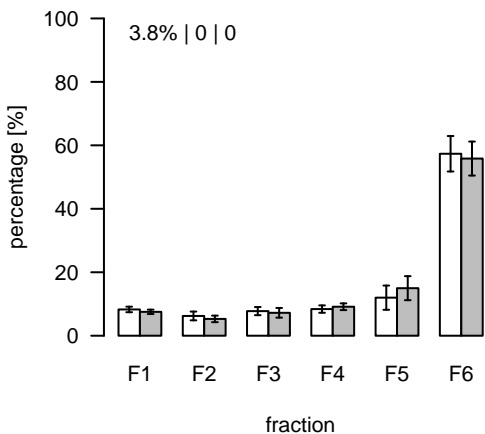

**L274 (m/z=826.510338; rt=4.05705)**  
T/S Cluster: L-4.1-1

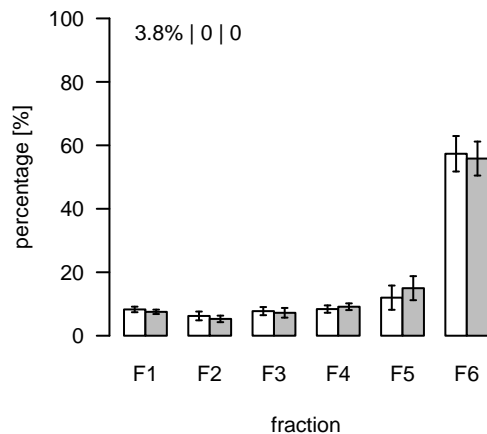

**L276 (m/z=827.528072; rt=4.06331)**  
T/S Cluster: L-4.1-1

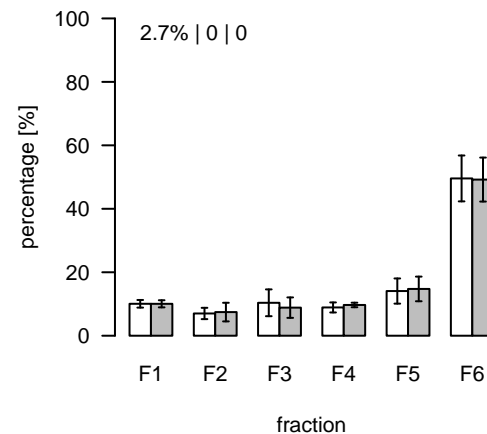

**L275 (m/z=796.525848; rt=4.06058)**  
T/S Cluster: L-4.1-1

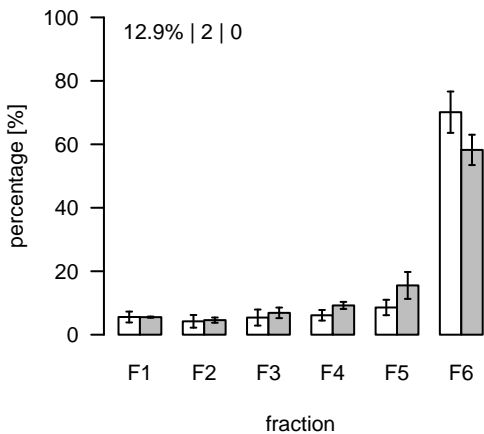

**L273 (m/z=801.480595; rt=4.05539)**  
T/S Cluster: L-4.1-1

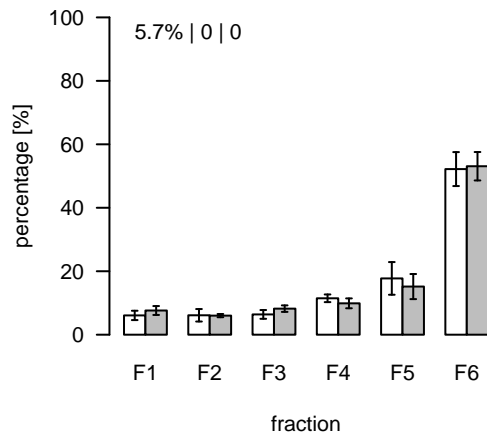

**L281 (m/z=650.443074; rt=4.09566)**  
T/S Cluster: L-4.1-2

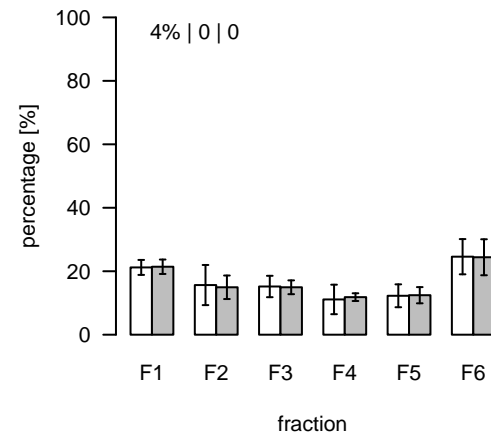

**L280 (m/z=650.422665; rt=4.09564)**  
T/S Cluster: L-4.1-2

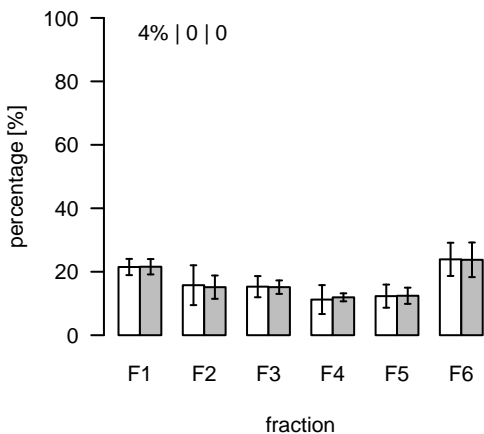

**L285 (m/z=651.447207; rt=4.09576)**  
T/S Cluster: L-4.1-2

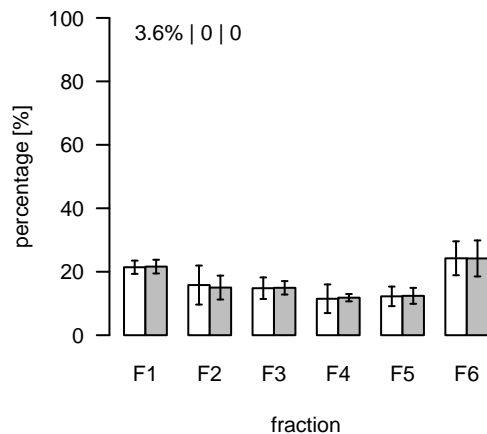

**L284 (m/z=651.42864; rt=4.09574)**  
T/S Cluster: L-4.1-2

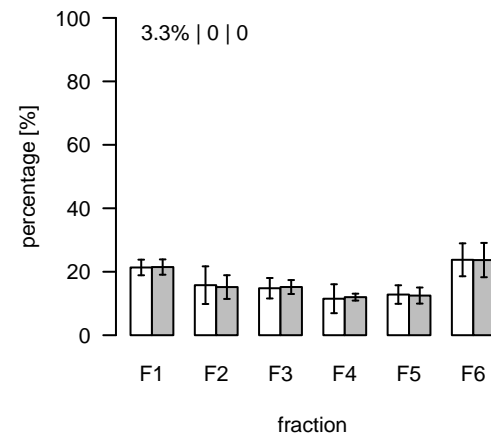

**L282 (m/z=325.219619; rt=4.09568)**  
T/S Cluster: L-4.1-2

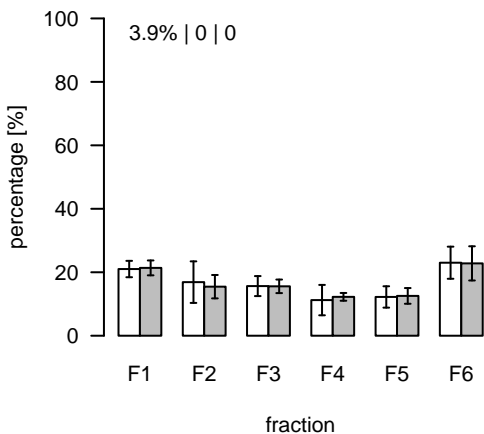

**L283 (m/z=325.223766; rt=4.09569)**  
T/S Cluster: L-4.1-2

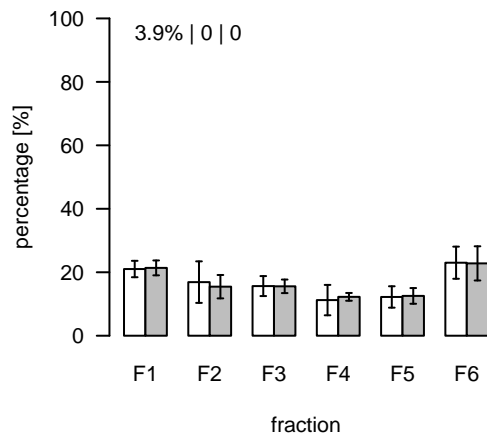

**L277 (m/z=662.44363; rt=4.07434)**  
T/S Cluster: L-4.1-2

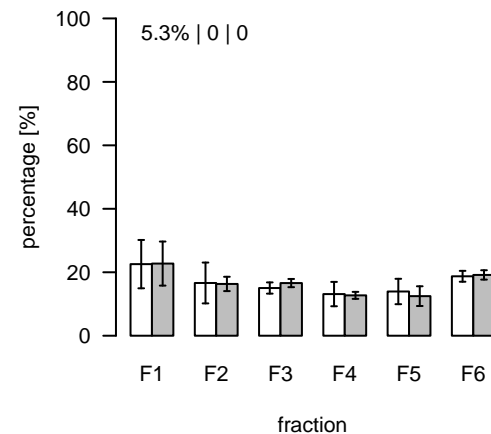

**L278 (m/z=662.427147; rt=4.07558)**  
T/S Cluster: L-4.1-2

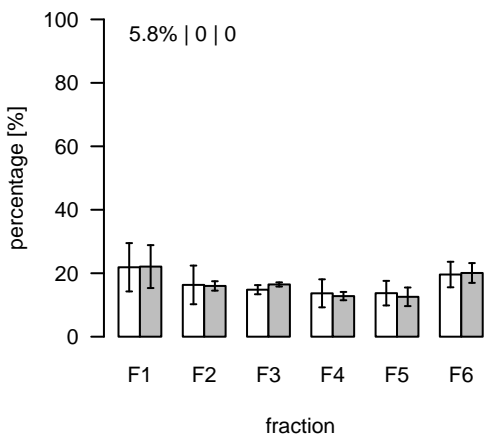

**L286 (m/z=652.448069; rt=4.0958)**  
T/S Cluster: L-4.1-2

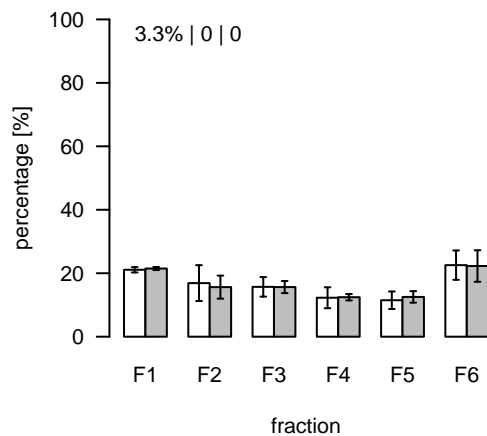

**L287 (m/z=325.723394; rt=4.09595)**  
T/S Cluster: L-4.1-2

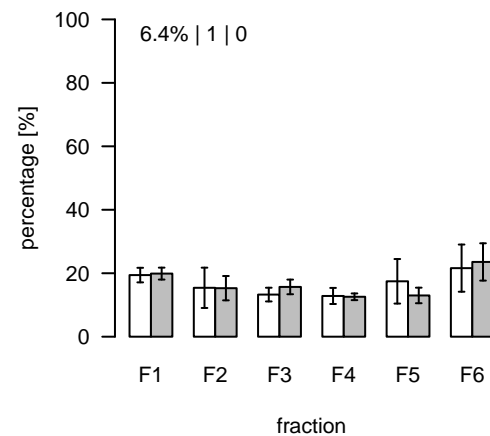

**L288 (m/z=216.816679; rt=4.09616)**  
T/S Cluster: L-4.1-2

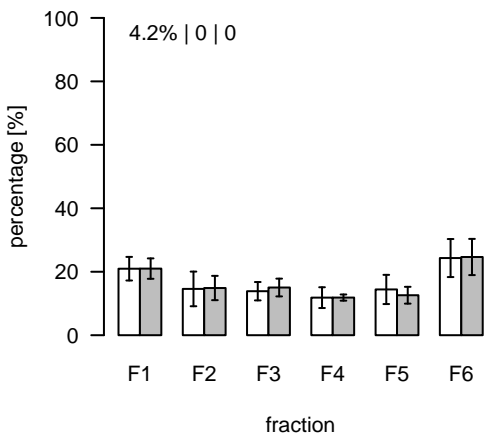

**L289 (m/z=216.814993; rt=4.09623)**  
T/S Cluster: L-4.1-2

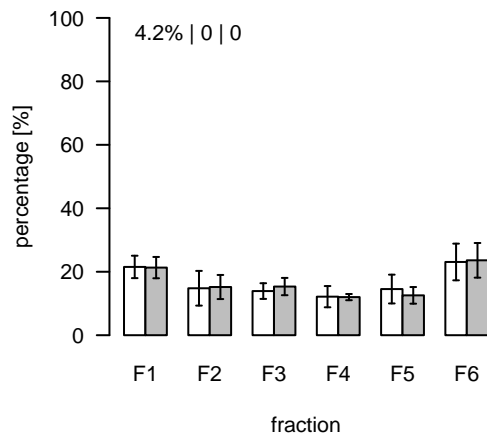

**L279 (m/z=680.460199; rt=4.09507)**  
T/S Cluster: L-4.1-3

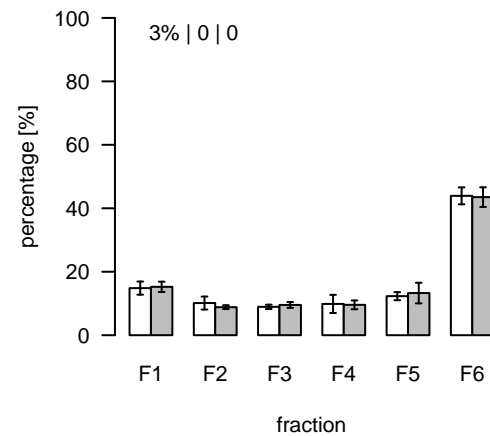

**L290 (m/z=841.555272; rt=4.09698)**  
T/S Cluster: L-4.1-4

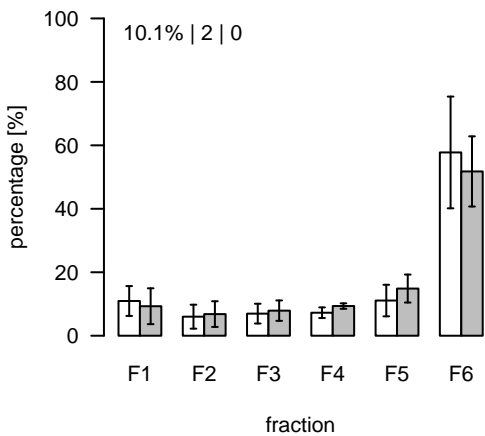

**L291 (m/z=804.608076; rt=4.10363)**  
T/S Cluster: L-4.1-5

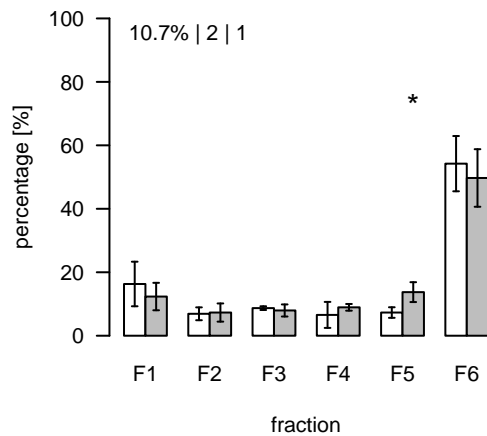

**L292 (m/z=828.543977; rt=4.10684)**  
T/S Cluster: L-4.1-6

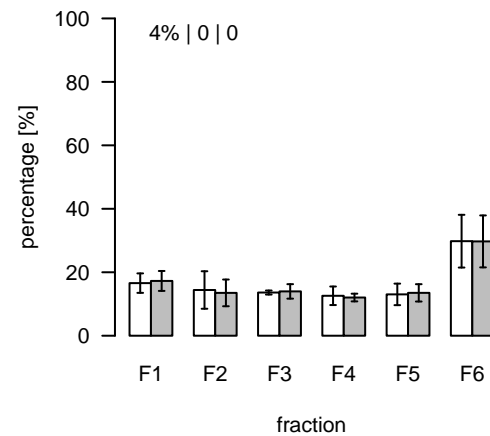

**L293 (m/z=852.536994; rt=4.10693)**  
T/S Cluster: L-4.1-7

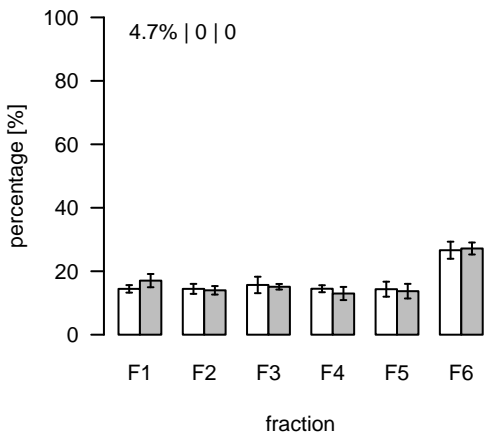

**L294 (m/z=829.549097; rt=4.11294)**  
T/S Cluster: L-4.1-8

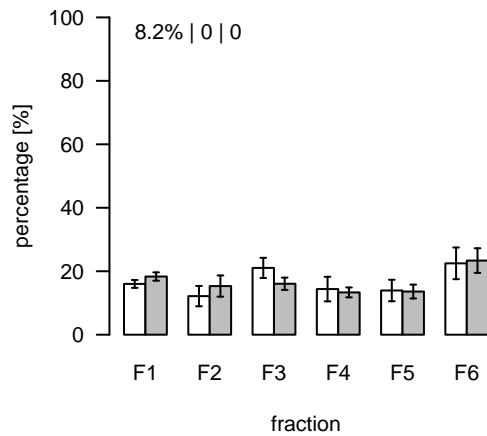

**L295 (m/z=806.509292; rt=4.14863)**  
T/S Cluster: L-4.1-9

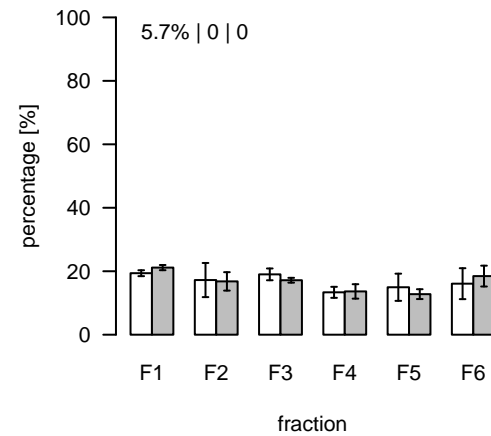

**L298 (m/z=807.546211; rt=4.15189)**  
T/S Cluster: L-4.2-1

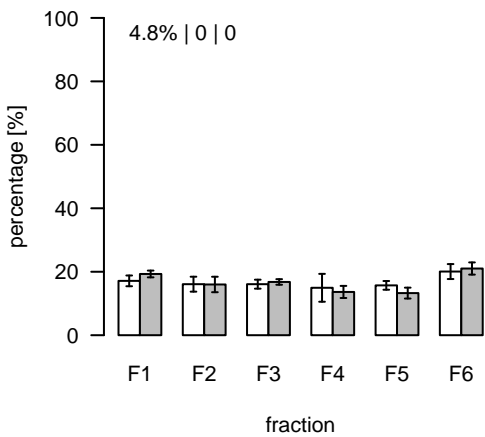

**L296 (m/z=807.56166; rt=4.15112)**  
T/S Cluster: L-4.2-1

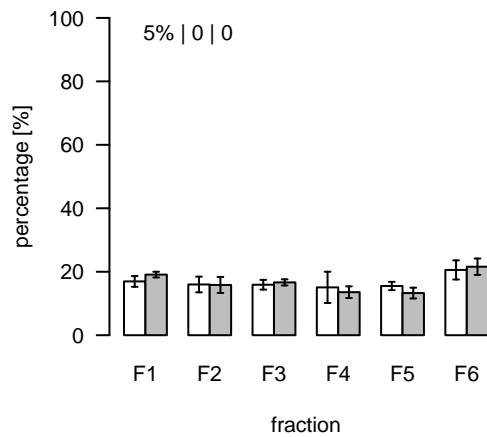

**L297 (m/z=806.5586; rt=4.15123)**  
T/S Cluster: L-4.2-2

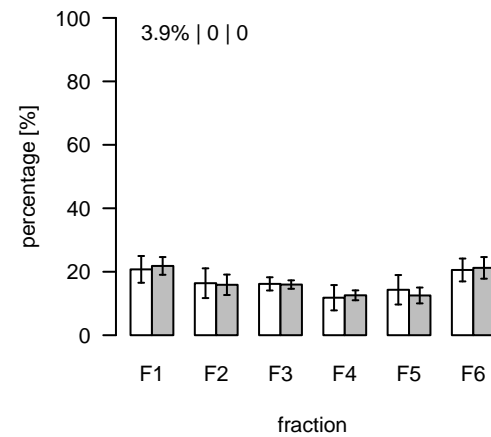

**L299 (m/z=806.537573; rt=4.15237)**  
T/S Cluster: L-4.2-2

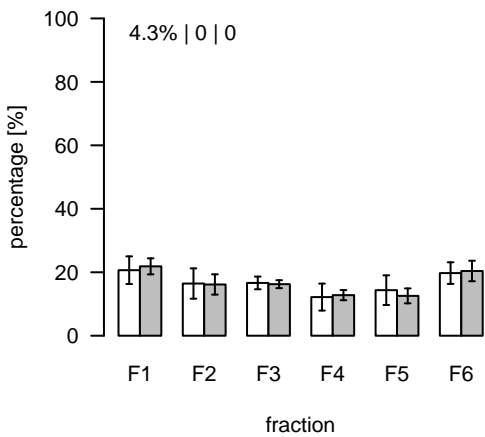

**L323 (m/z=678.454147; rt=4.24489)**  
T/S Cluster: L-4.2-3

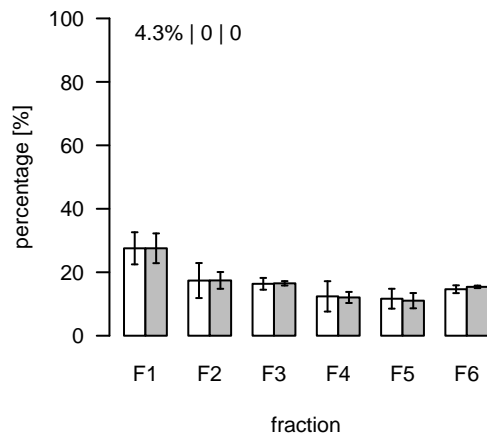

**L300 (m/z=664.458052; rt=4.1542)**  
T/S Cluster: L-4.2-3

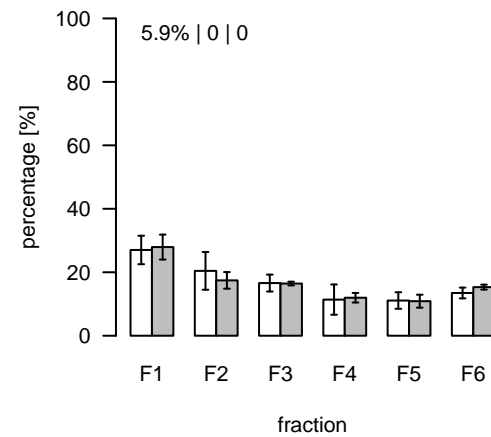



**L322 (m/z=679.459932; rt=4.24368)**  
T/S Cluster: L-4.2-3

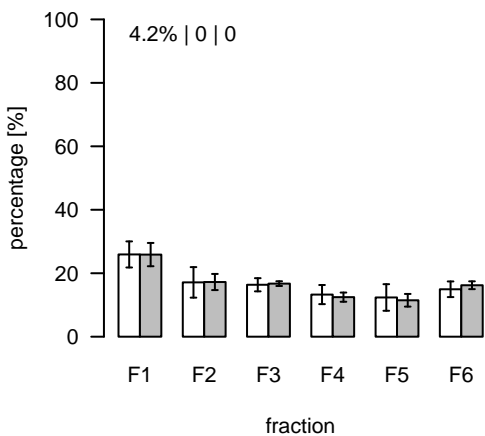

**L309 (m/z=750.496153; rt=4.18119)**  
T/S Cluster: L-4.2-3

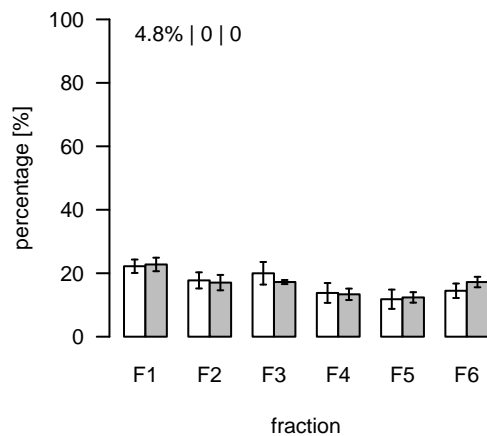

**L304 (m/z=676.459596; rt=4.15476)**  
T/S Cluster: L-4.2-4

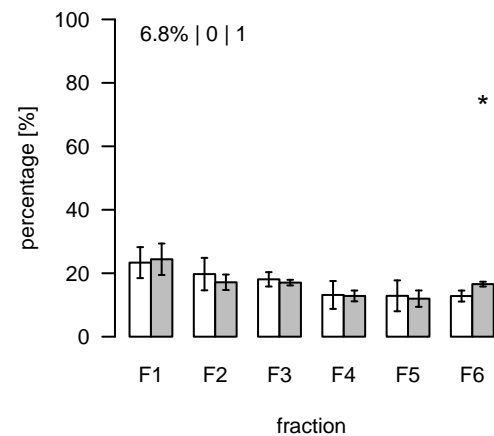

**L303 (m/z=676.440656; rt=4.15474)**  
T/S Cluster: L-4.2-4

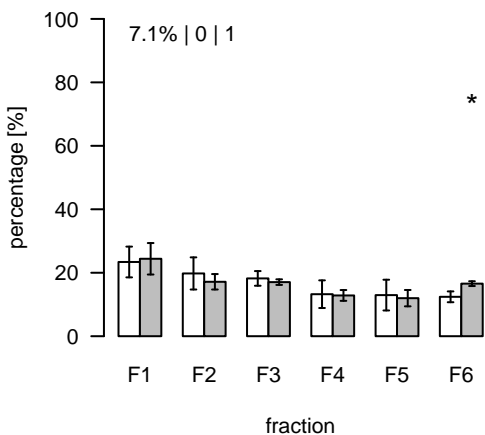

**L305 (m/z=677.449712; rt=4.15479)**  
T/S Cluster: L-4.2-4

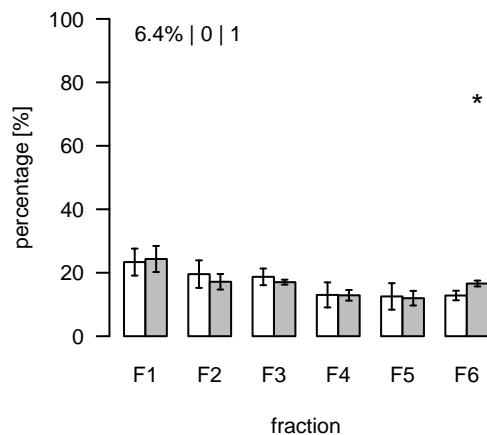

**L306 (m/z=677.465102; rt=4.15481)**  
T/S Cluster: L-4.2-4

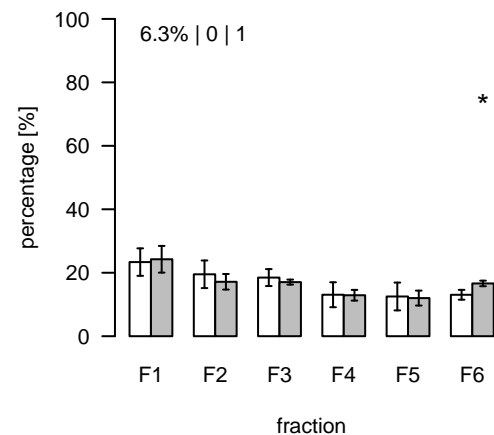

**L315 (m/z=692.453165; rt=4.21553)**  
T/S Cluster: L-4.2-4

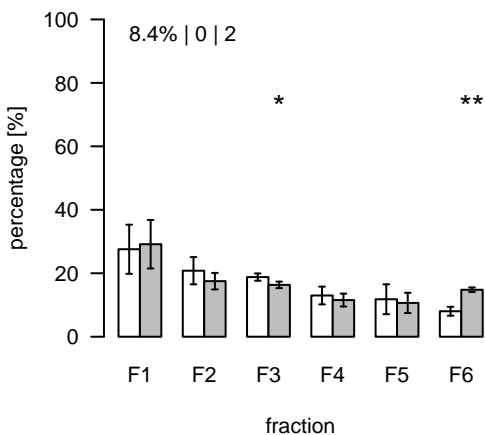

**L314 (m/z=692.440741; rt=4.21528)**  
T/S Cluster: L-4.2-4

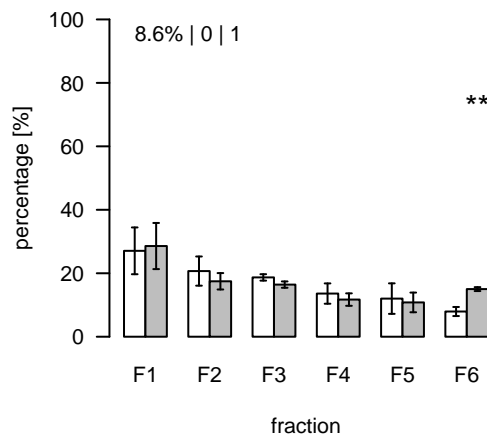

**L301 (m/z=338.229676; rt=4.15457)**  
T/S Cluster: L-4.2-4

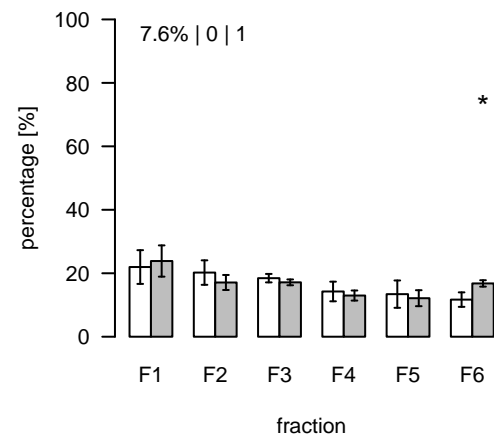

**L307 (m/z=867.539361; rt=4.15645)**  
T/S Cluster: L-4.2-5

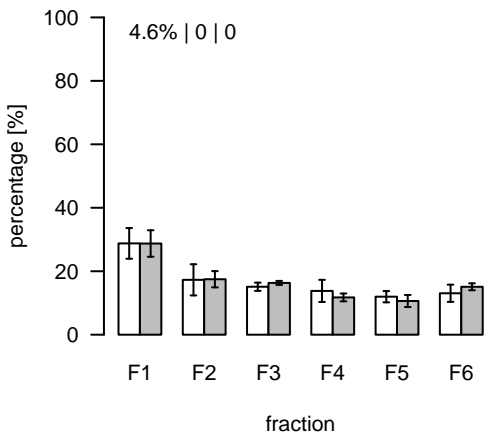

**L302 (m/z=868.542251; rt=4.15472)**  
T/S Cluster: L-4.2-5

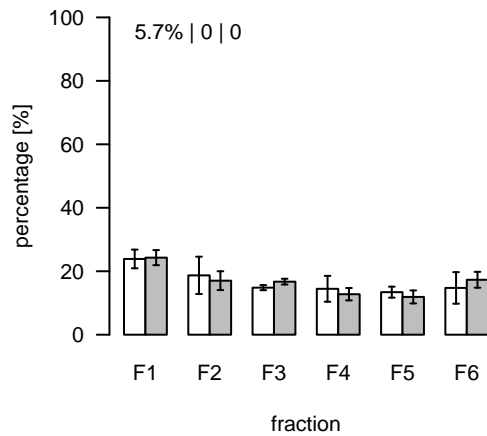

**L308 (m/z=830.557181; rt=4.17212)**  
T/S Cluster: L-4.2-6

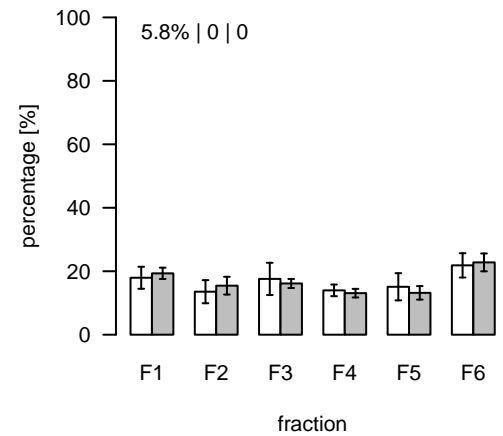

**L311 (m/z=810.535032; rt=4.18448)**  
T/S Cluster: L-4.2-7

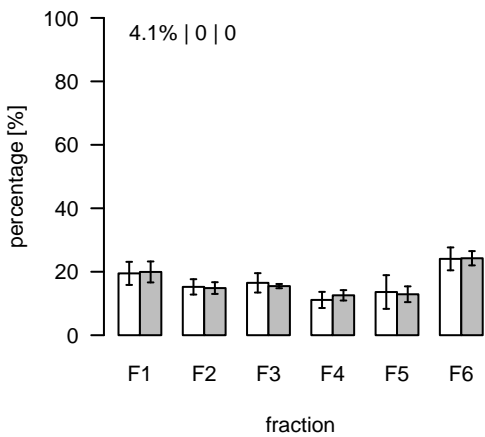

**L310 (m/z=810.554037; rt=4.18369)**  
T/S Cluster: L-4.2-7

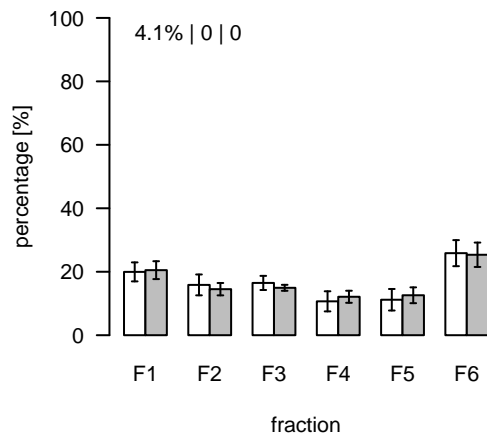

**L313 (m/z=812.55147; rt=4.20337)**  
T/S Cluster: L-4.2-8

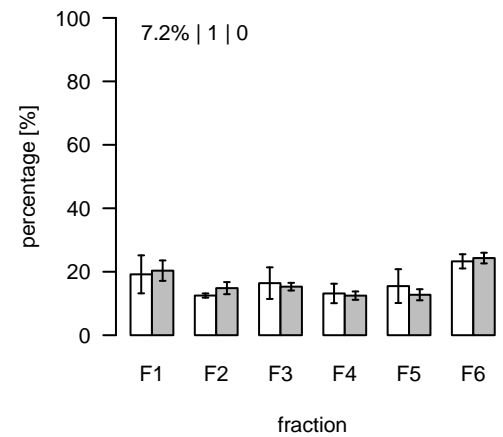

**L312 (m/z=812.524075; rt=4.19958)**  
T/S Cluster: L-4.2-8

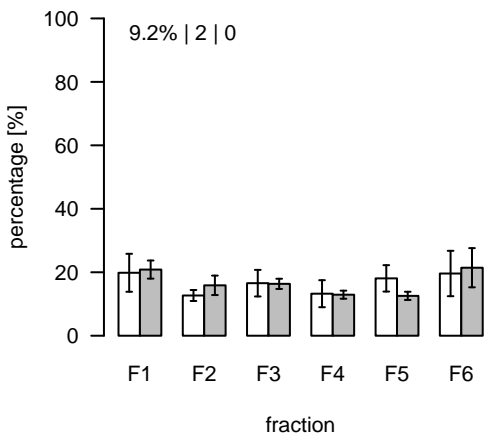

**L316 (m/z=740.499515; rt=4.21747)**  
T/S Cluster: L-4.2-9

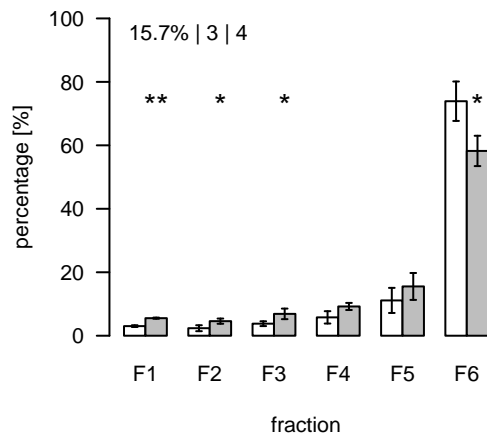

**L317 (m/z=740.476401; rt=4.21752)**  
T/S Cluster: L-4.2-9

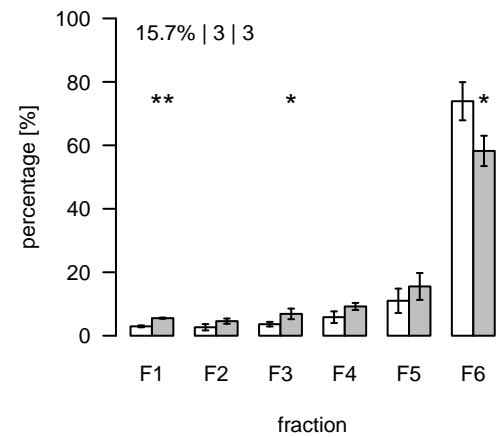

**L319 (m/z=814.565217; rt=4.21951)**  
T/S Cluster: L-4.2-10

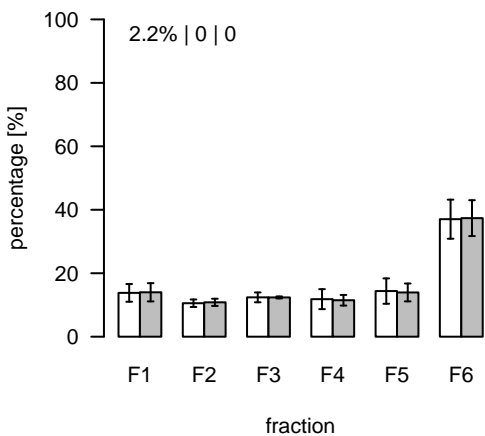

**L318 (m/z=815.569188; rt=4.21785)**  
T/S Cluster: L-4.2-10

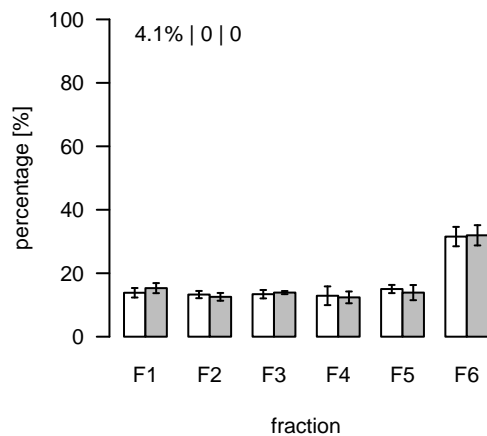

**L321 (m/z=854.555436; rt=4.22558)**  
T/S Cluster: L-4.2-11

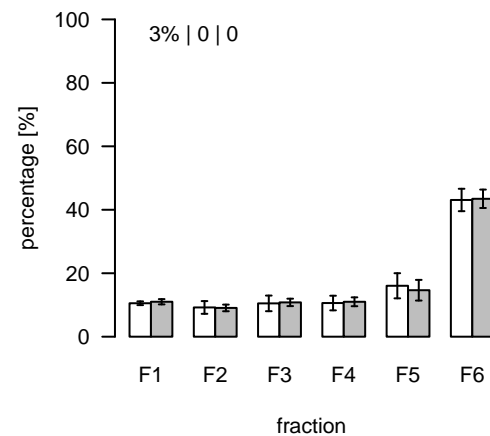

**L320 (m/z=854.526705; rt=4.22487)**  
T/S Cluster: L-4.2-11

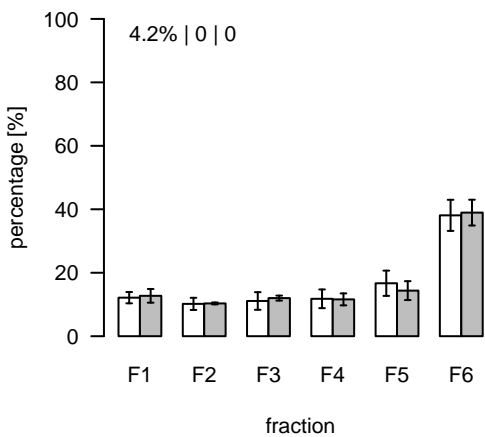

**L324 (m/z=702.473358; rt=4.24647)**  
T/S Cluster: L-4.2-12

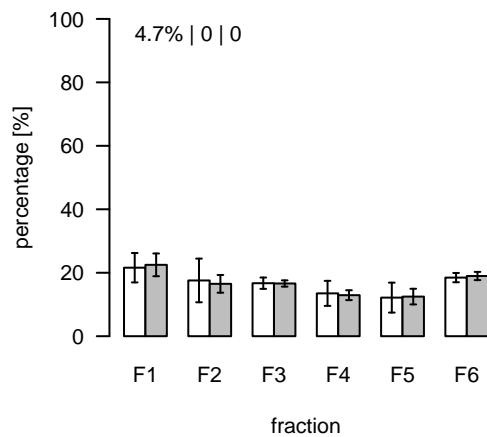

**L350 (m/z=738.483079; rt=4.28206)**  
T/S Cluster: L-4.3-1

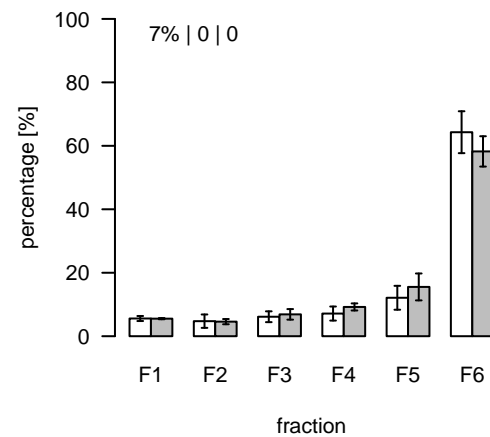

**L339 (m/z=796.524292; rt=4.27783)**  
T/S Cluster: L-4.3-1

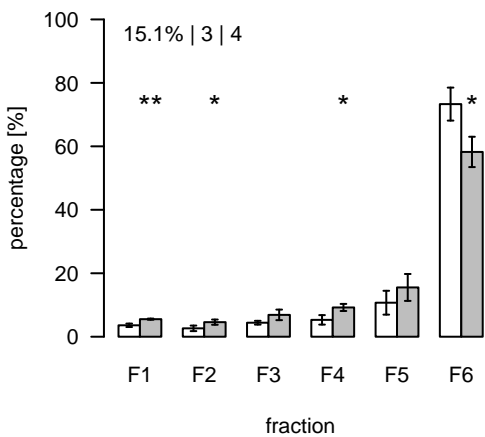

**L349 (m/z=738.462209; rt=4.28181)**  
T/S Cluster: L-4.3-1

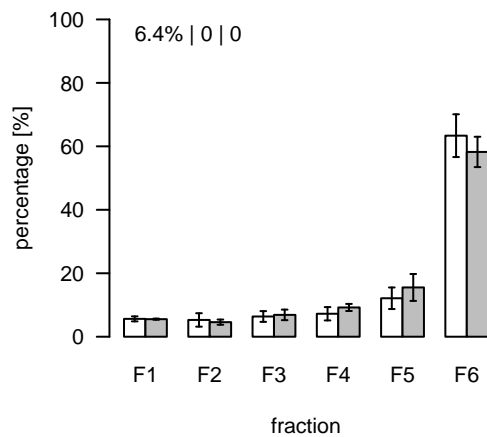

**L340 (m/z=801.479976; rt=4.27825)**  
T/S Cluster: L-4.3-1

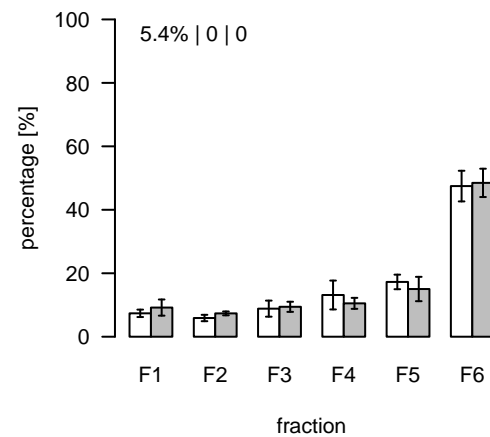

**L337 (m/z=797.528127; rt=4.27661)**  
T/S Cluster: L-4.3-1

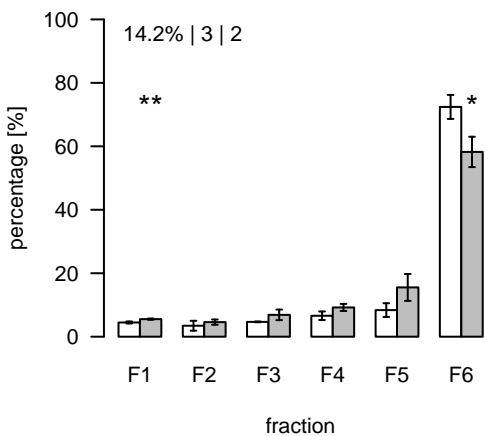

**L336 (m/z=796.486032; rt=4.27491)**  
T/S Cluster: L-4.3-1

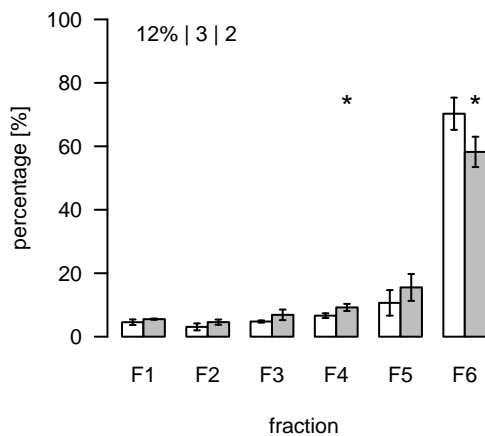

**L352 (m/z=797.501621; rt=4.28622)**  
T/S Cluster: L-4.3-1

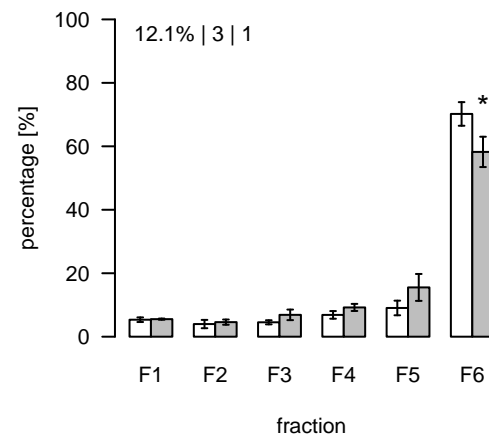

**L325 (m/z=798.536792; rt=4.25506)**  
T/S Cluster: L-4.3-1

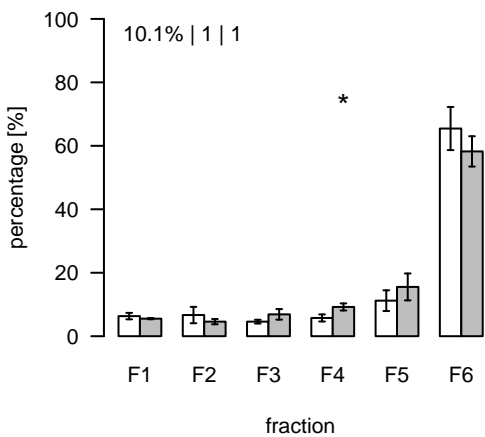

**L338 (m/z=743.437743; rt=4.27779)**  
T/S Cluster: L-4.3-1

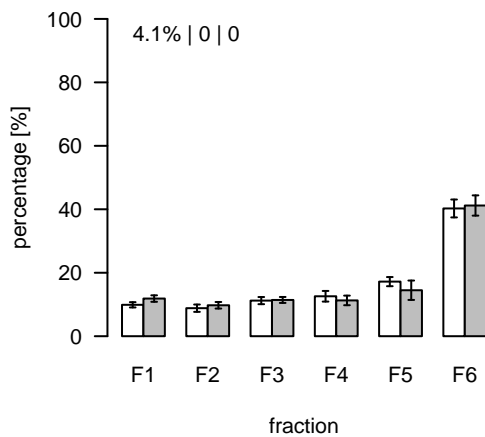

**L347 (m/z=739.48784; rt=4.28099)**  
T/S Cluster: L-4.3-1

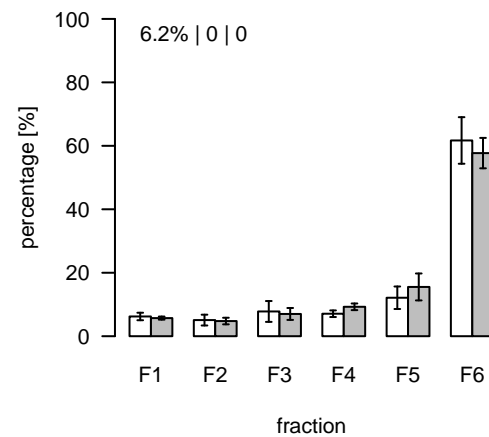

**L346 (m/z=739.46788; rt=4.28076)**  
T/S Cluster: L-4.3-1

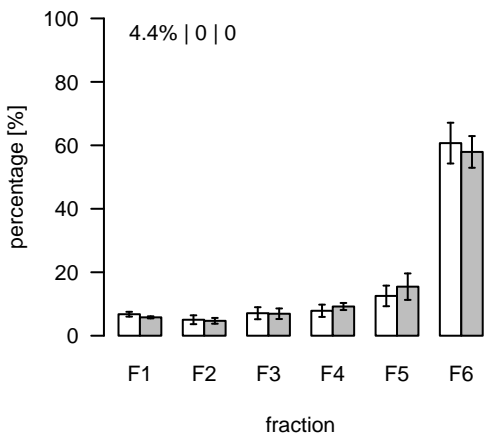

**L335 (m/z=743.469318; rt=4.27437)**  
T/S Cluster: L-4.3-1

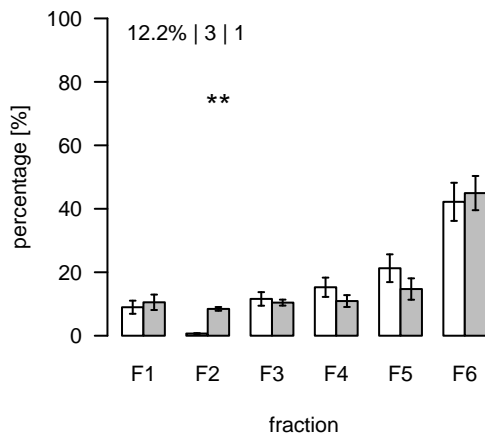

**L327 (m/z=678.475136; rt=4.25575)**  
T/S Cluster: L-4.3-2

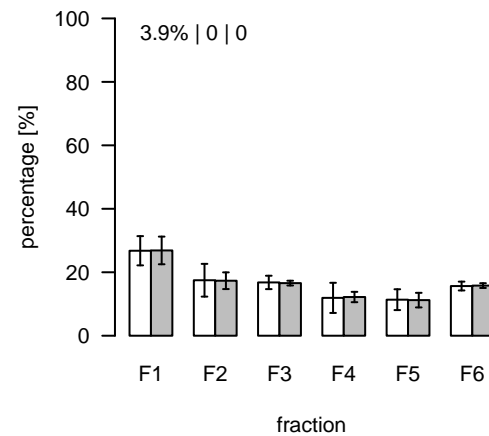

**L328 (m/z=678.454061; rt=4.25592)**  
T/S Cluster: L-4.3-2

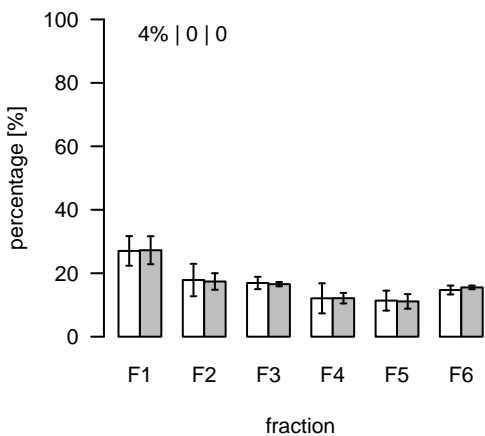

**L326 (m/z=679.47665; rt=4.25542)**  
T/S Cluster: L-4.3-2

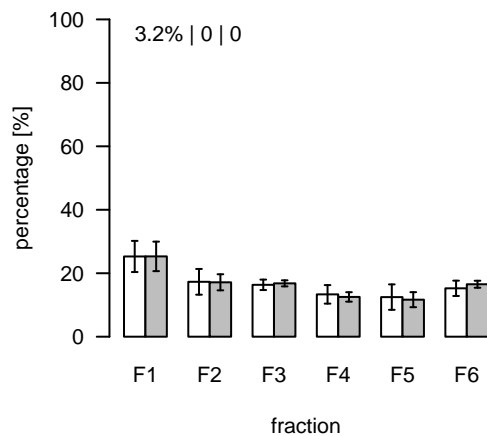

**L357 (m/z=706.469317; rt=4.29969)**  
T/S Cluster: L-4.3-2

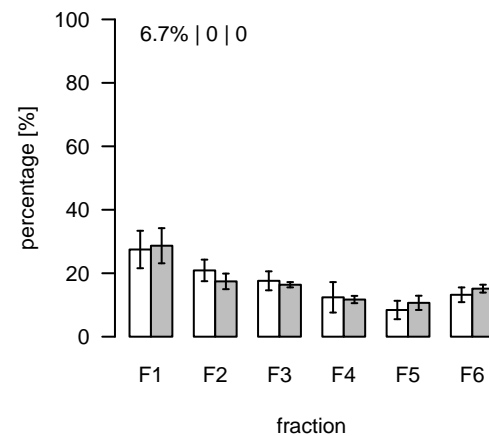

**L359 (m/z=706.469208; rt=4.30464)**  
T/S Cluster: L-4.3-2

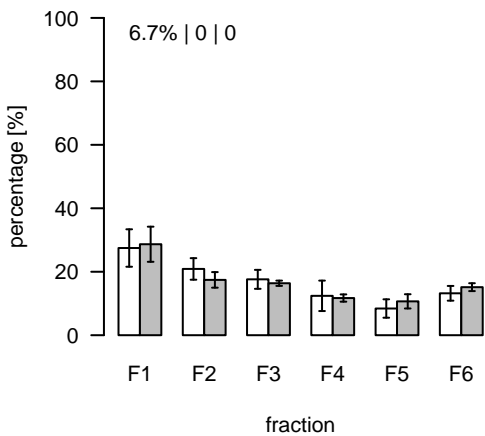

**L329 (m/z=339.237716; rt=4.25622)**  
T/S Cluster: L-4.3-2

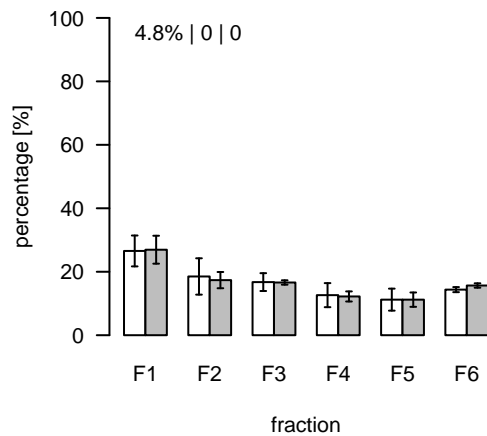

**L330 (m/z=814.532546; rt=4.26275)**  
T/S Cluster: L-4.3-3

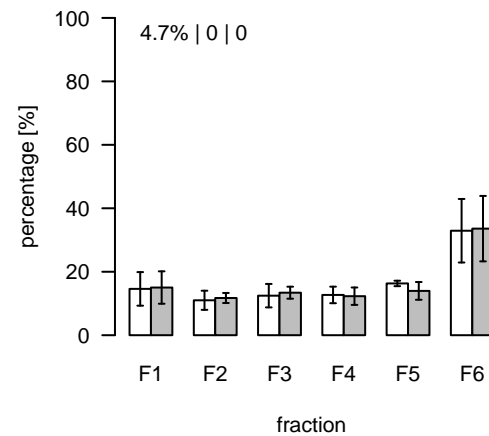

**L332 (m/z=726.480252; rt=4.26985)**  
T/S Cluster: L-4.3-4

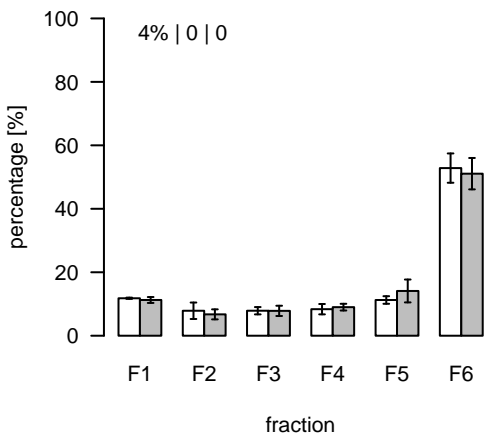

**L331 (m/z=726.465989; rt=4.26795)**  
T/S Cluster: L-4.3-4

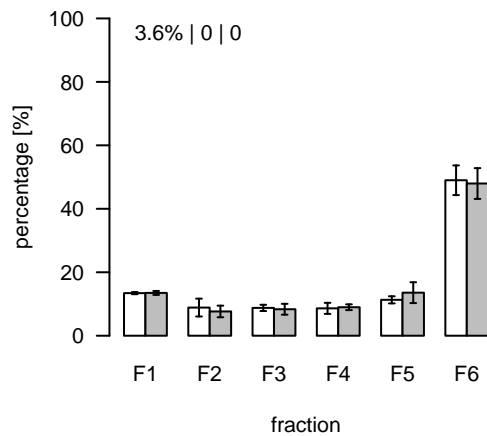

**L333 (m/z=702.475369; rt=4.27129)**  
T/S Cluster: L-4.3-5

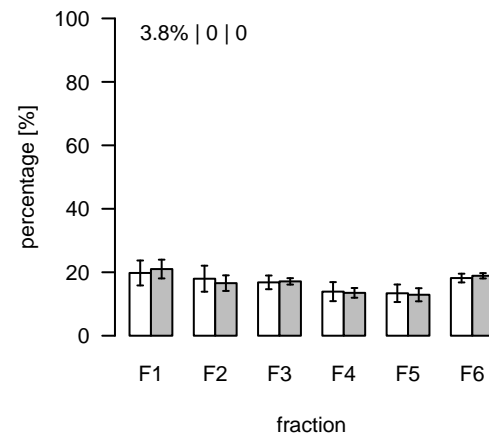

**L341 (m/z=702.473711; rt=4.27882)**  
T/S Cluster: L-4.3-5

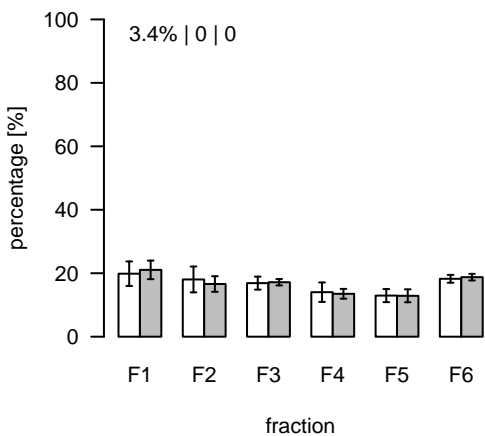

**L334 (m/z=702.458232; rt=4.27243)**  
T/S Cluster: L-4.3-5

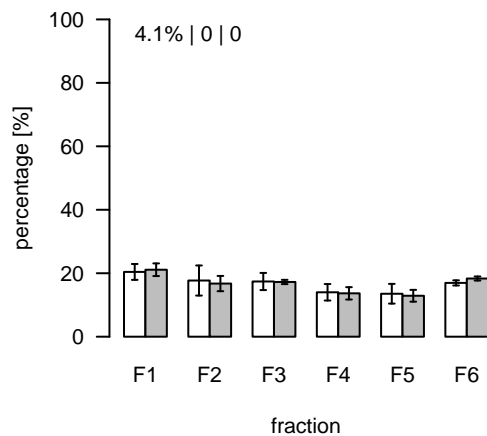

**L342 (m/z=787.536579; rt=4.27988)**  
T/S Cluster: L-4.3-6

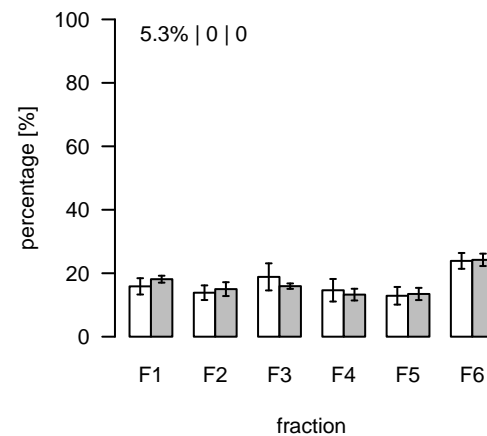

**L343 (m/z=813.553895; rt=4.2799)**  
T/S Cluster: L-4.3-7

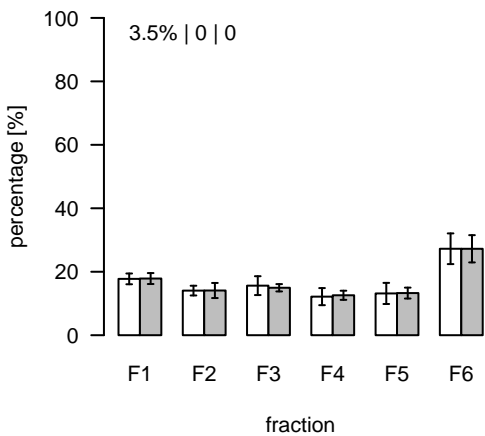

**L344 (m/z=786.522322; rt=4.28037)**  
T/S Cluster: L-4.3-8

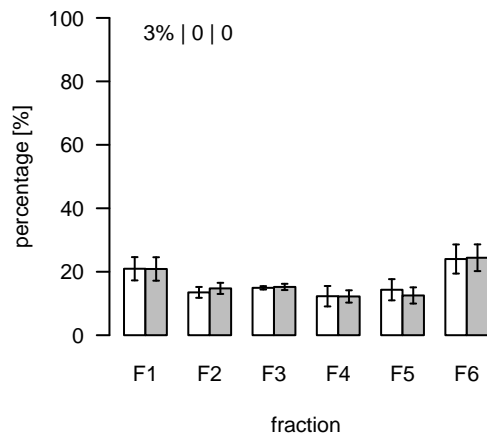

**L345 (m/z=786.53208; rt=4.28039)**  
T/S Cluster: L-4.3-8

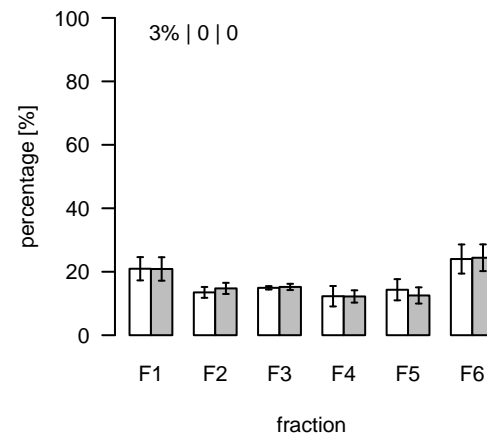

**L348 (m/z=786.500151; rt=4.2816)**  
T/S Cluster: L-4.3-8

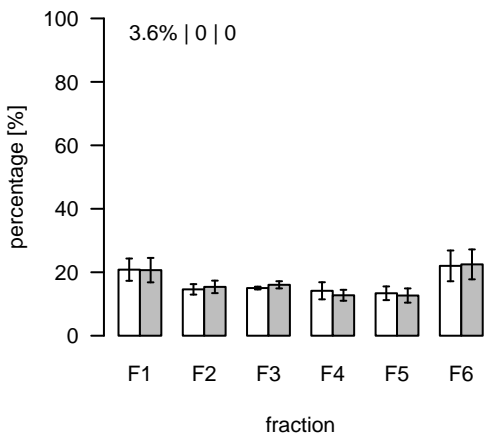

**L351 (m/z=812.5494; rt=4.28414)**  
T/S Cluster: L-4.3-9

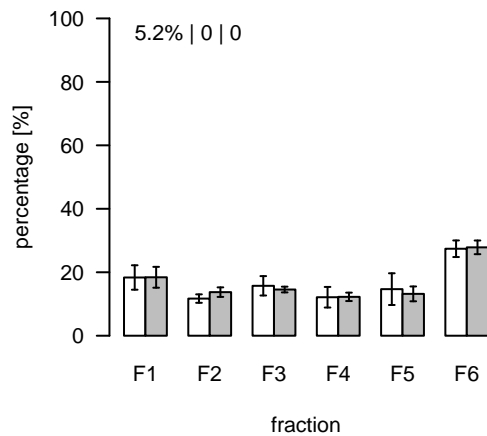

**L364 (m/z=812.52447; rt=4.34347)**  
T/S Cluster: L-4.3-9

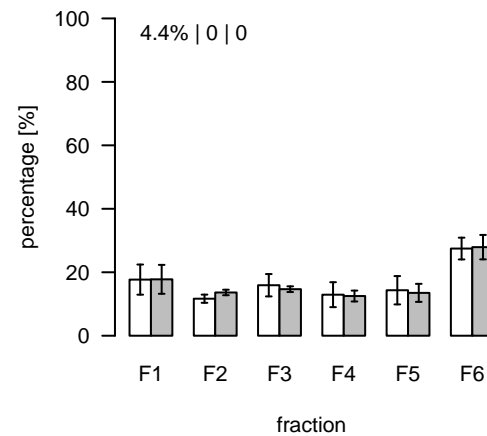

**L363 (m/z=813.532577; rt=4.33874)**  
T/S Cluster: L-4.3-9

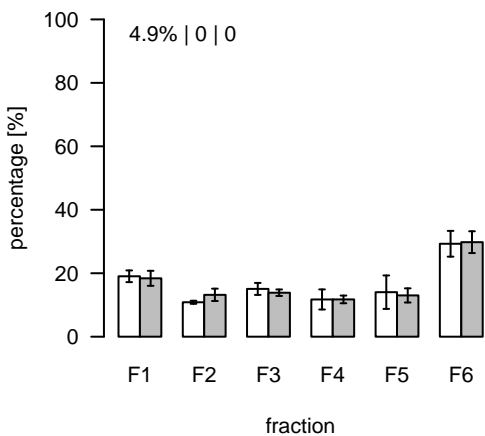

**L353 (m/z=840.533008; rt=4.28673)**  
T/S Cluster: L-4.3-10

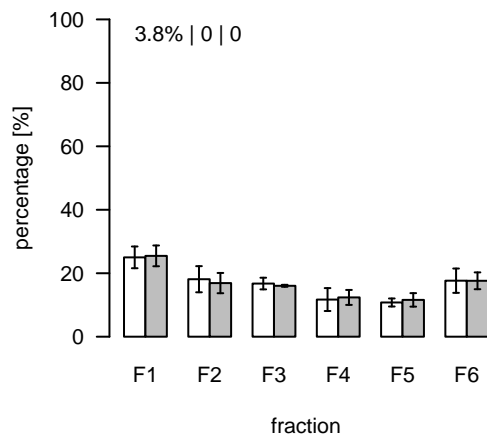

**L358 (m/z=840.519293; rt=4.30409)**  
T/S Cluster: L-4.3-10

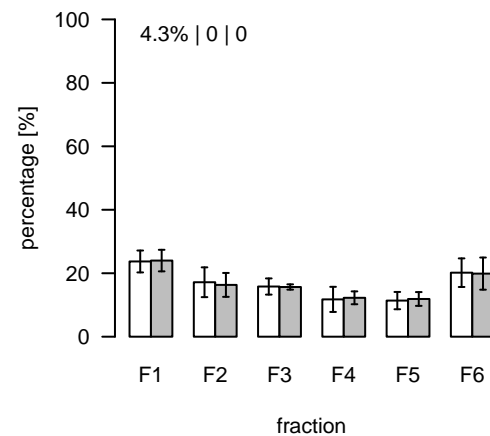

**L360 (m/z=840.508852; rt=4.31114)**  
T/S Cluster: L-4.3-10

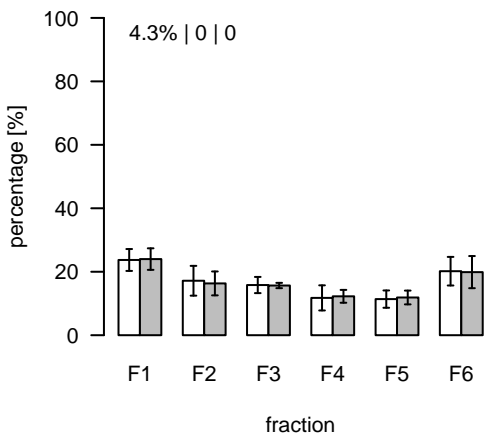

**L354 (m/z=842.496005; rt=4.28842)**  
T/S Cluster: L-4.3-11

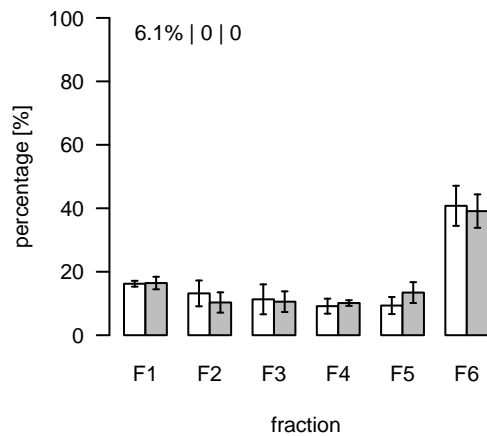

**L355 (m/z=820.529635; rt=4.29735)**  
T/S Cluster: L-4.3-12

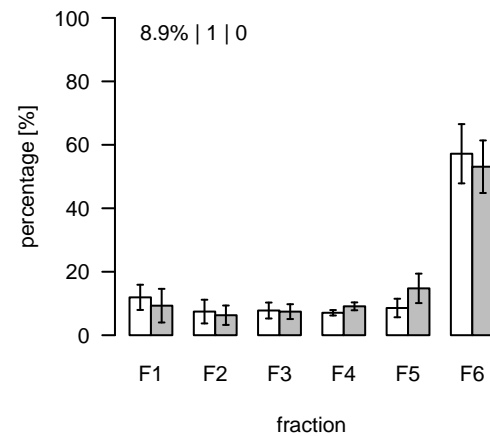

**L356 (m/z=841.474169; rt=4.29828)**  
T/S Cluster: L-4.3-13

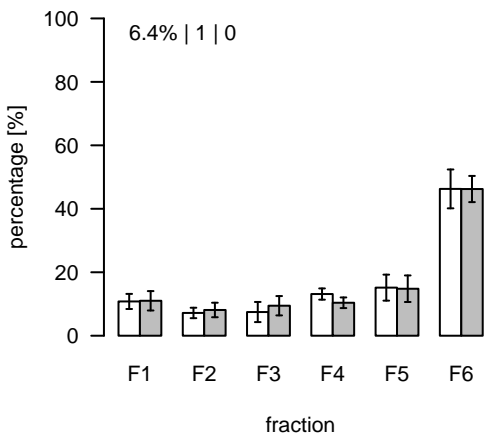

**L361 (m/z=984.645941; rt=4.3133)**  
T/S Cluster: L-4.3-14

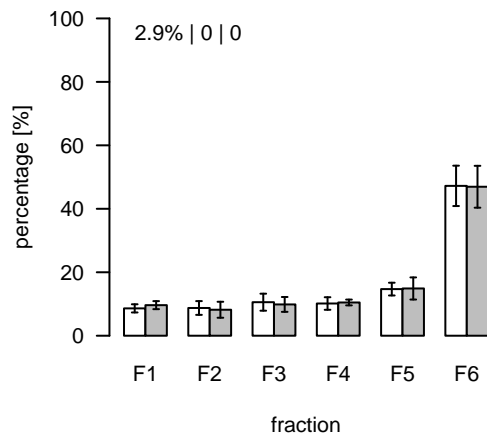

**L365 (m/z=984.598244; rt=4.34507)**  
T/S Cluster: L-4.3-14

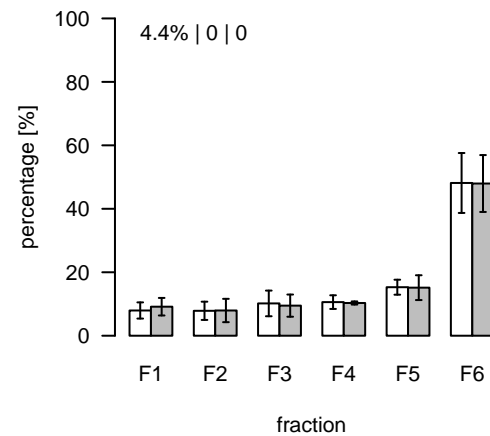

**L362 (m/z=688.457667; rt=4.31426)**  
T/S Cluster: L-4.3-15

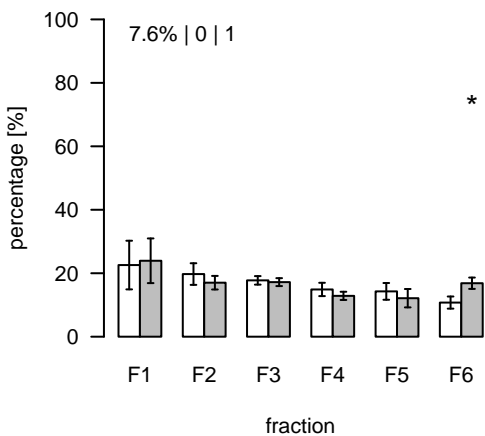

**L371 (m/z=802.527397; rt=4.36615)**  
T/S Cluster: L-4.4-1

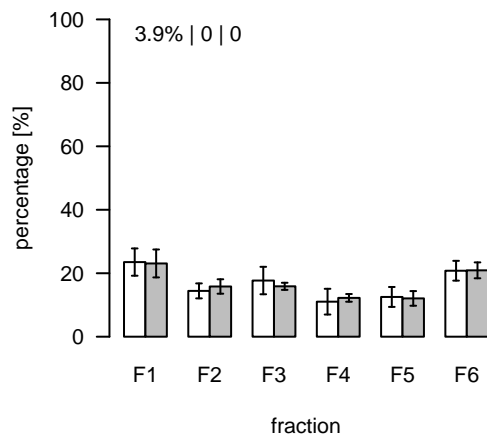

**L366 (m/z=802.492882; rt=4.36363)**  
T/S Cluster: L-4.4-1

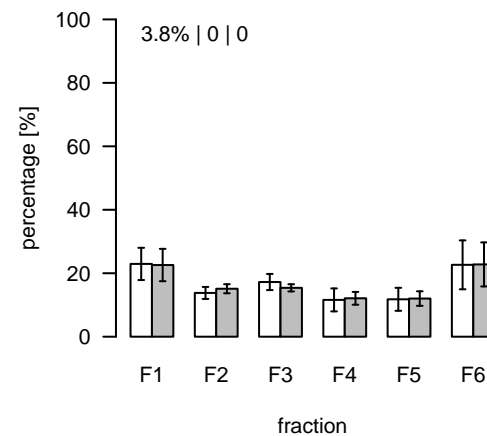

**L370 (m/z=803.53172; rt=4.36589)**  
T/S Cluster: L-4.4-1

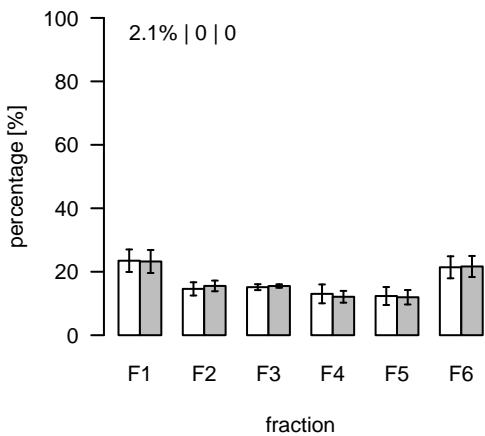

**L369 (m/z=803.508335; rt=4.36568)**  
T/S Cluster: L-4.4-1

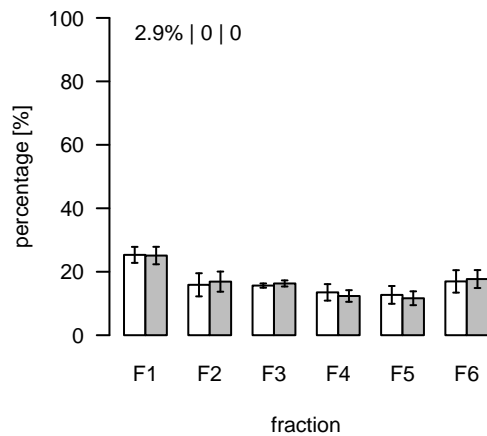

**L405 (m/z=804.547476; rt=4.42583)**  
T/S Cluster: L-4.4-1

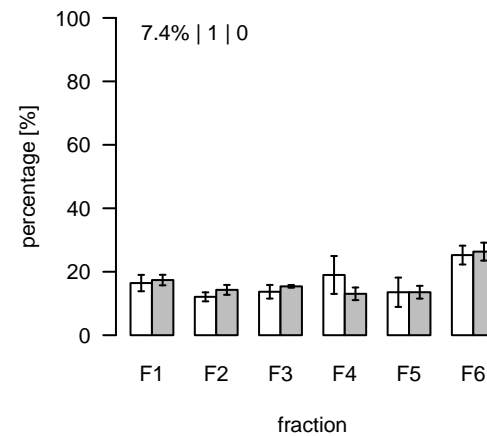

**L406 (m/z=804.542597; rt=4.42585)**  
T/S Cluster: L-4.4-1

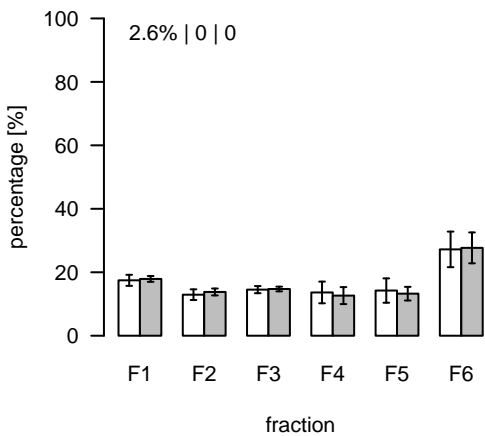

**L408 (m/z=804.580244; rt=4.42687)**  
T/S Cluster: L-4.4-1

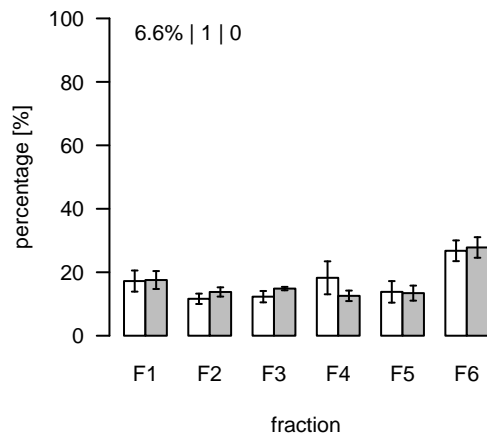

**L411 (m/z=805.551155; rt=4.43045)**  
T/S Cluster: L-4.4-1

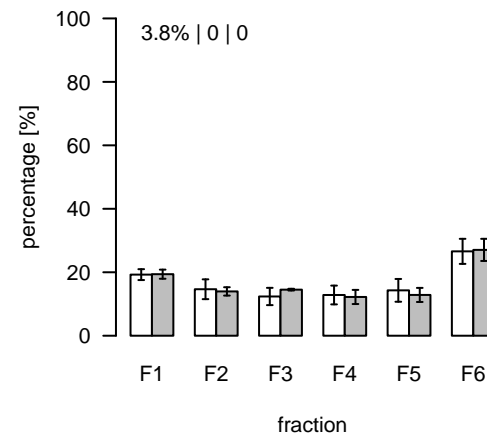



**L412 (m/z=805.546295; rt=4.43073)**  
T/S Cluster: L-4.4-1

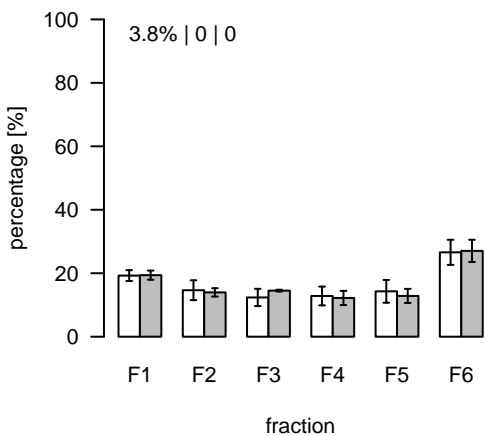

**L420 (m/z=752.498548; rt=4.44469)**  
T/S Cluster: L-4.4-2

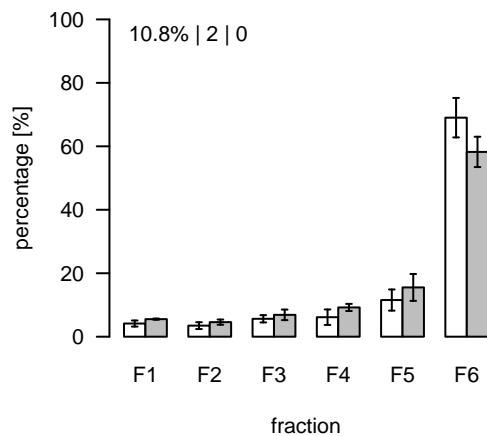

**L393 (m/z=942.585674; rt=4.38964)**  
T/S Cluster: L-4.4-2

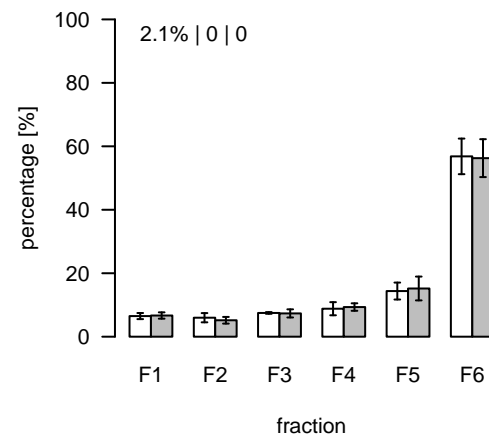

**L385 (m/z=986.613272; rt=4.38665)**  
T/S Cluster: L-4.4-2

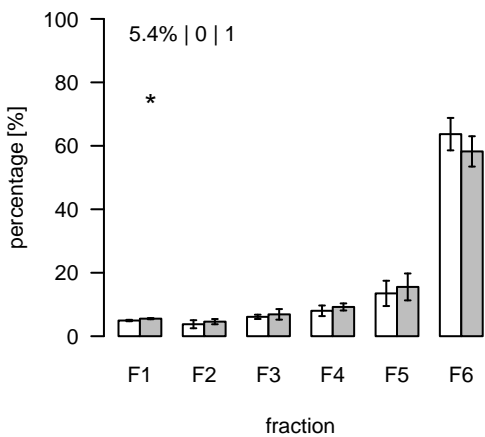

**L394 (m/z=942.548228; rt=4.39029)**  
T/S Cluster: L-4.4-2

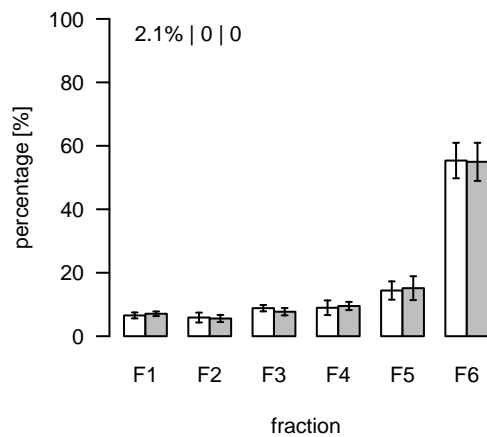

**L386 (m/z=987.618036; rt=4.3868)**  
T/S Cluster: L-4.4-2

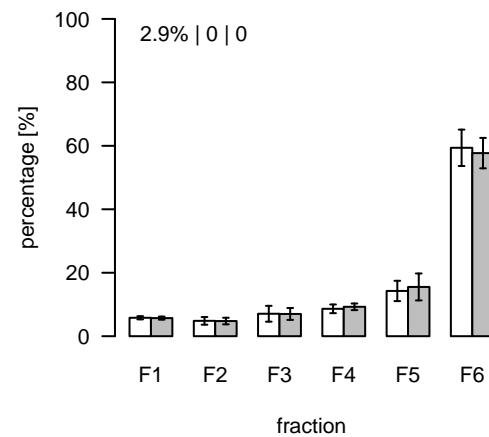

**L383 (m/z=986.56821; rt=4.38593)**  
T/S Cluster: L-4.4-2

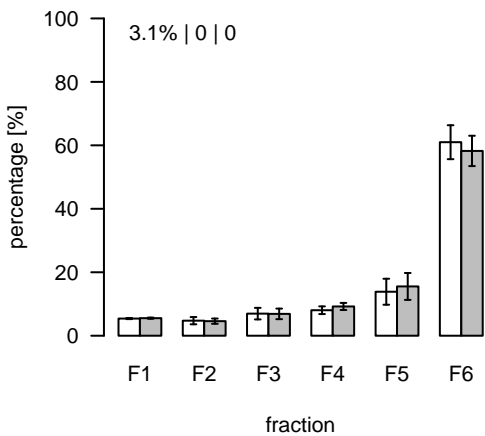

**L384 (m/z=987.581444; rt=4.38644)**  
T/S Cluster: L-4.4-2

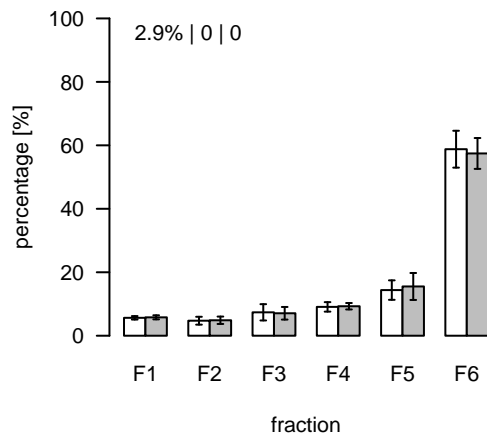

**L367 (m/z=930.589661; rt=4.36508)**  
T/S Cluster: L-4.4-2

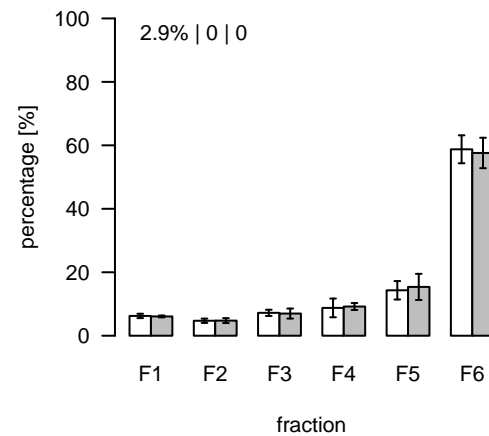

**L368 (m/z=930.560958; rt=4.36548)**  
T/S Cluster: L-4.4-2

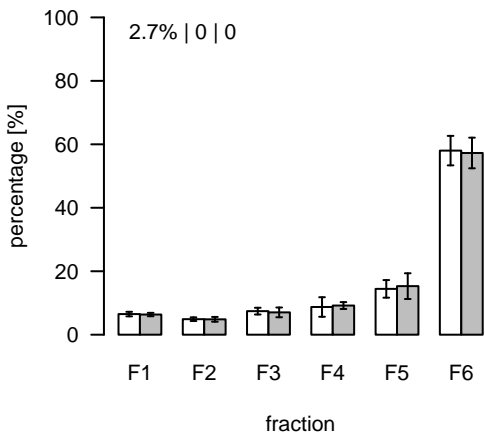

**L414 (m/z=832.501011; rt=4.43263)**  
T/S Cluster: L-4.4-2

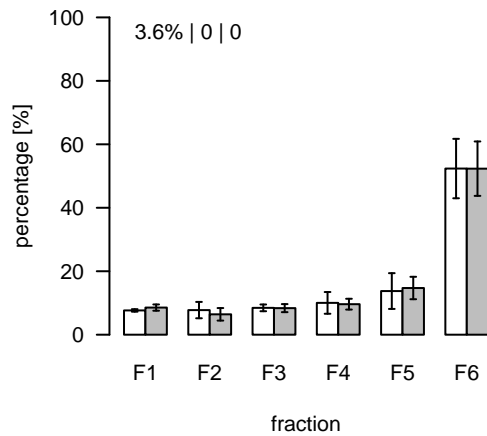

**L382 (m/z=824.556741; rt=4.38466)**  
T/S Cluster: L-4.4-2

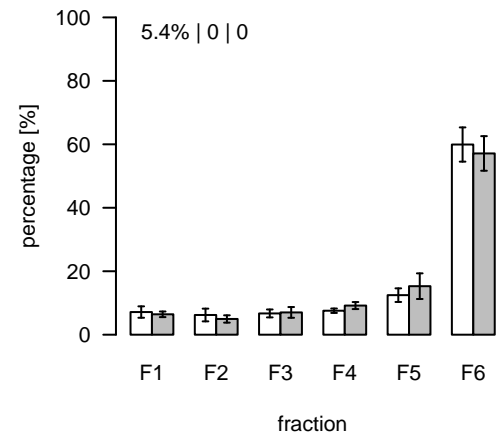

**L421 (m/z=752.463855; rt=4.44574)**  
T/S Cluster: L-4.4-2

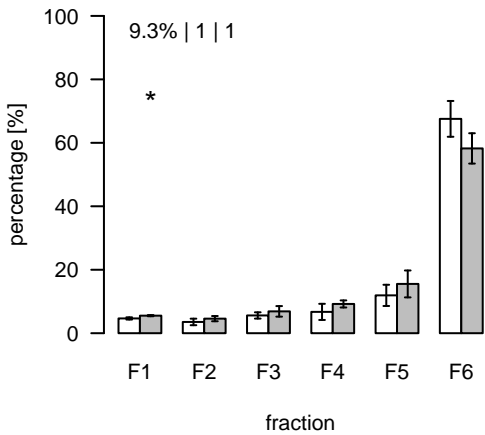

**L396 (m/z=980.625636; rt=4.39259)**  
T/S Cluster: L-4.4-2

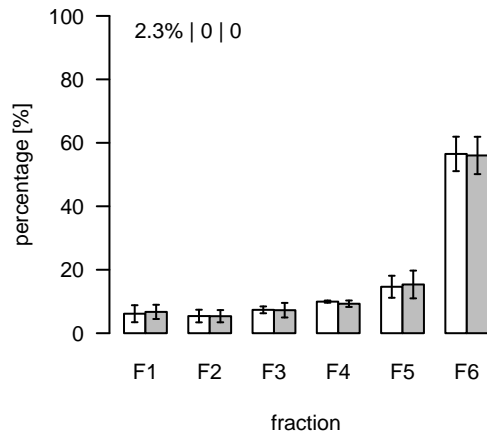

**L395 (m/z=980.588855; rt=4.39213)**  
T/S Cluster: L-4.4-2

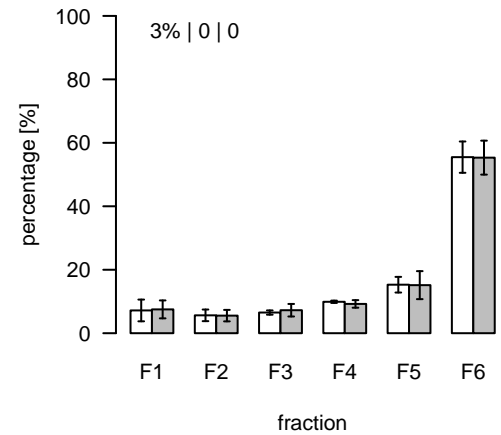

**L422 (m/z=757.455369; rt=4.44747)**  
T/S Cluster: L-4.4-2

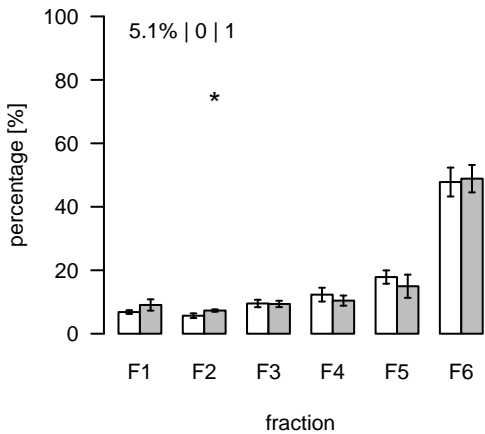

**L423 (m/z=757.433746; rt=4.44758)**  
T/S Cluster: L-4.4-2

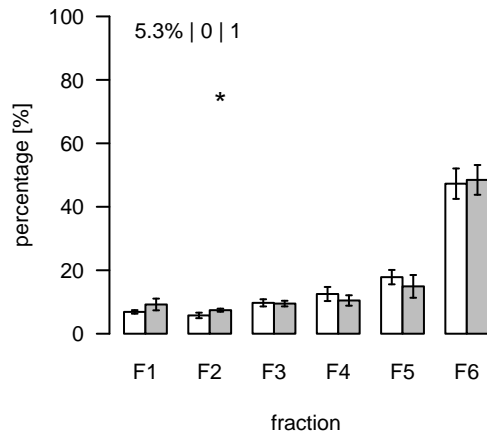

**L372 (m/z=811.548908; rt=4.36809)**  
T/S Cluster: L-4.4-3

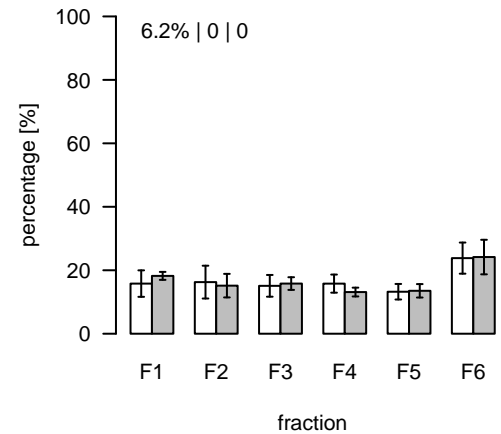

**L373 (m/z=810.535994; rt=4.37012)**  
T/S Cluster: L-4.4-4

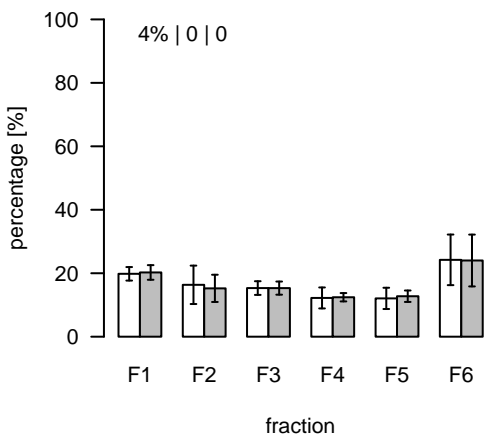

**L375 (m/z=704.4901; rt=4.37276)**  
T/S Cluster: L-4.4-5

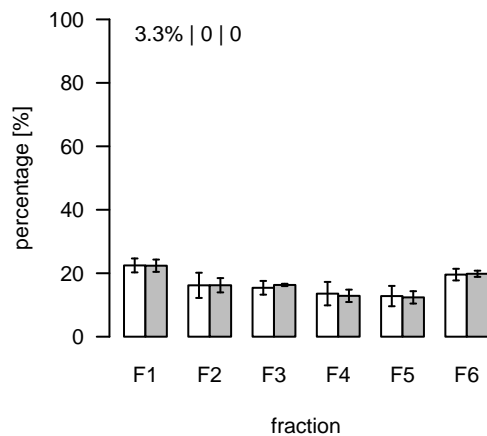

**L374 (m/z=704.473901; rt=4.37236)**  
T/S Cluster: L-4.4-5

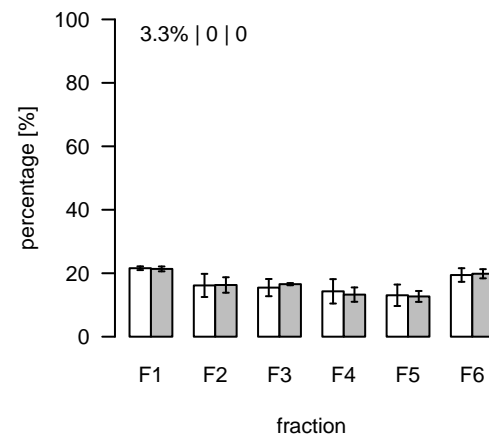

**L376 (m/z=866.531649; rt=4.37571)**  
T/S Cluster: L-4.4-6

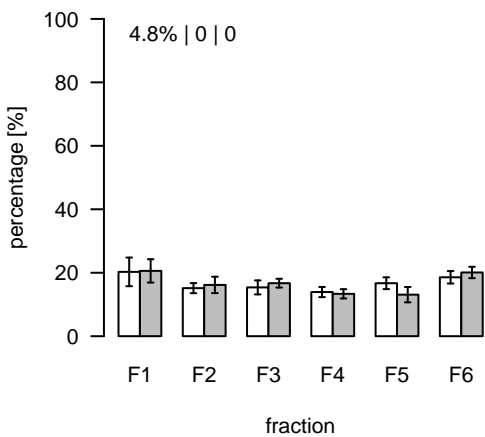

**L379 (m/z=838.50633; rt=4.38072)**  
T/S Cluster: L-4.4-7

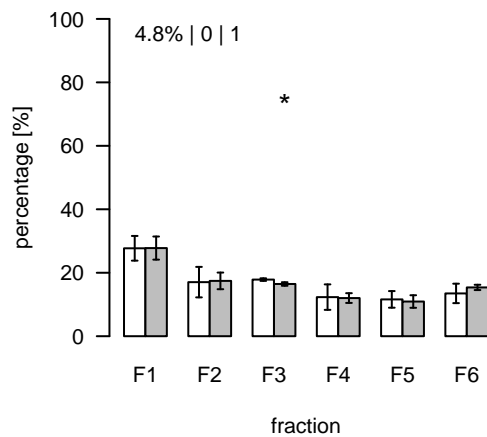

**L377 (m/z=838.494291; rt=4.37985)**  
T/S Cluster: L-4.4-7

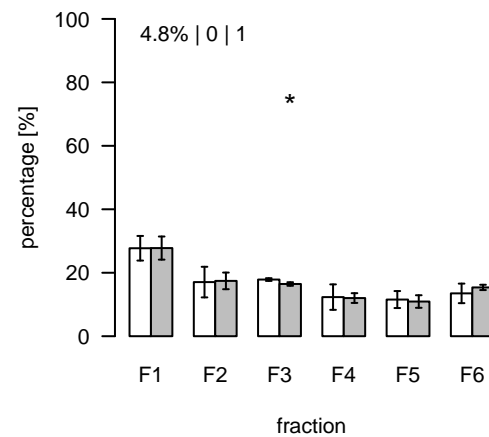

**L381 (m/z=838.515749; rt=4.38141)**  
T/S Cluster: L-4.4-7

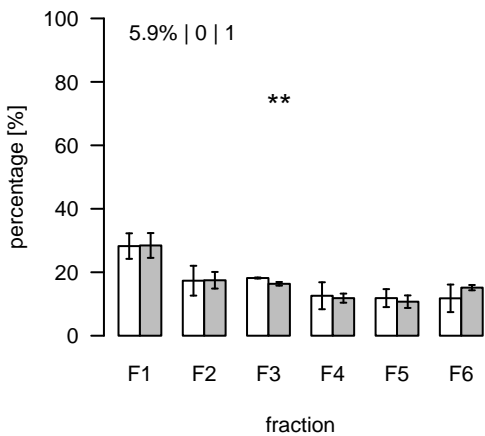

**L380 (m/z=839.504151; rt=4.38093)**  
T/S Cluster: L-4.4-7

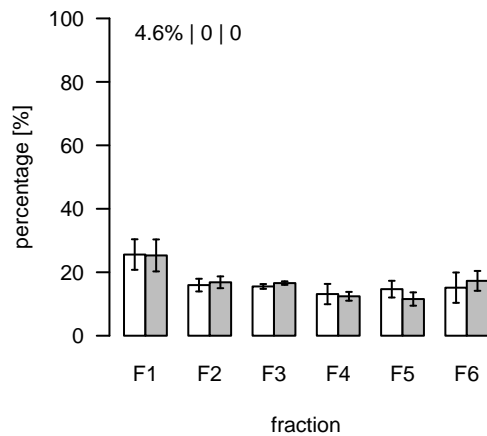

**L378 (m/z=839.533048; rt=4.37985)**  
T/S Cluster: L-4.4-8

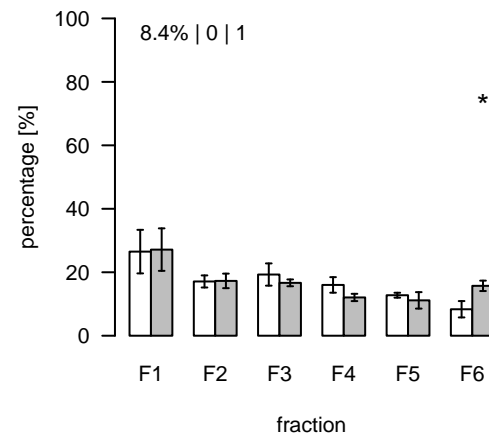

**L391 (m/z=808.573809; rt=4.38911)**  
T/S Cluster: L-4.4-9

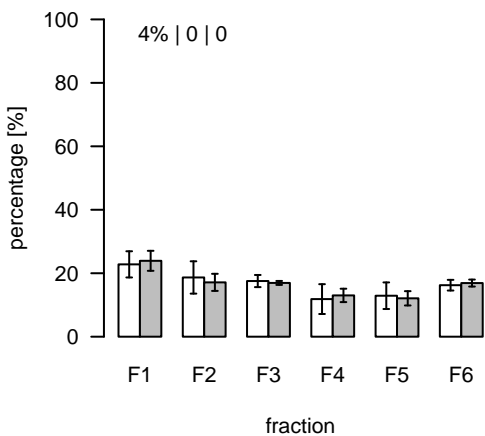

**L392 (m/z=808.546667; rt=4.38925)**  
T/S Cluster: L-4.4-9

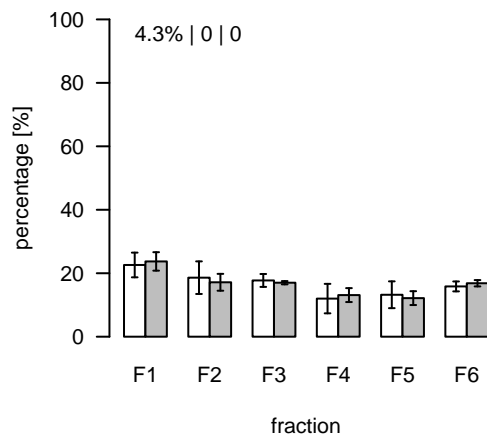

**L389 (m/z=809.577932; rt=4.38891)**  
T/S Cluster: L-4.4-9

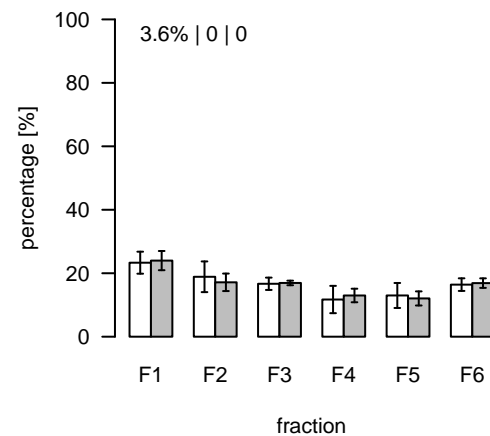

**L390 (m/z=809.559042; rt=4.38898)**  
T/S Cluster: L-4.4-9

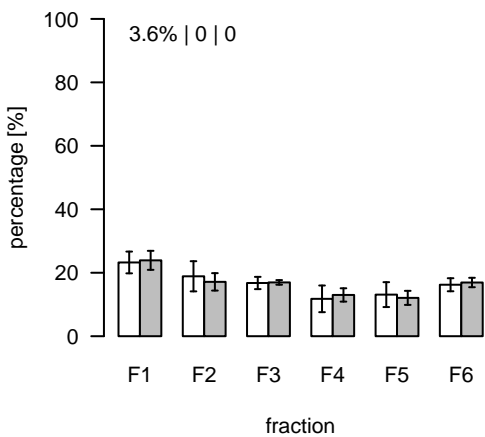

**L387 (m/z=810.581492; rt=4.3869)**  
T/S Cluster: L-4.4-9

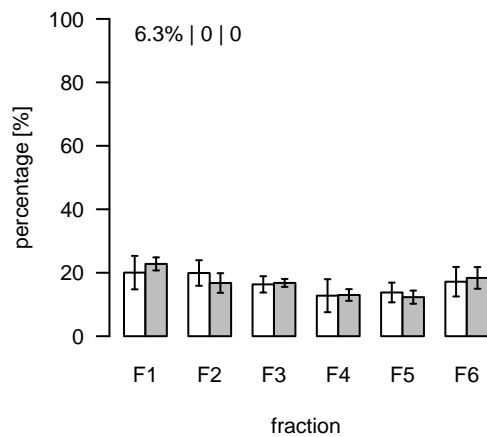

**L388 (m/z=404.288091; rt=4.38845)**  
T/S Cluster: L-4.4-9

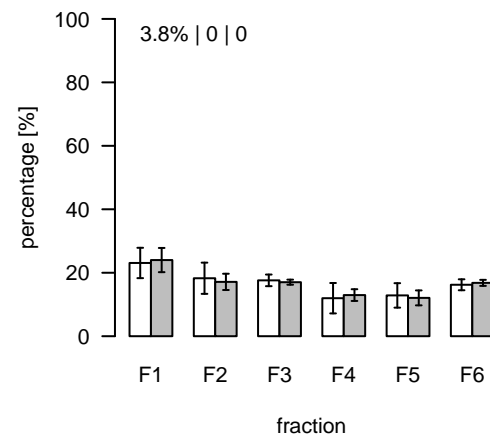

**L416 (m/z=784.519718; rt=4.43776)**  
T/S Cluster: L-4.4-10

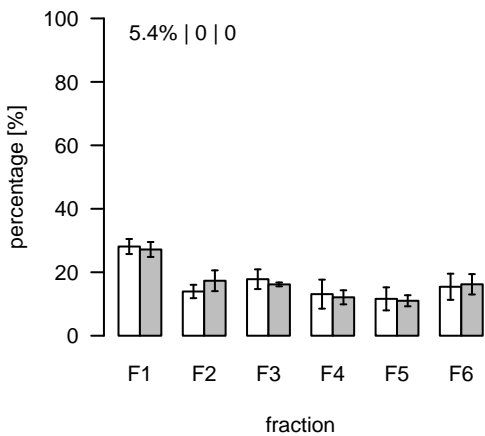

**L415 (m/z=784.507255; rt=4.43774)**  
T/S Cluster: L-4.4-10

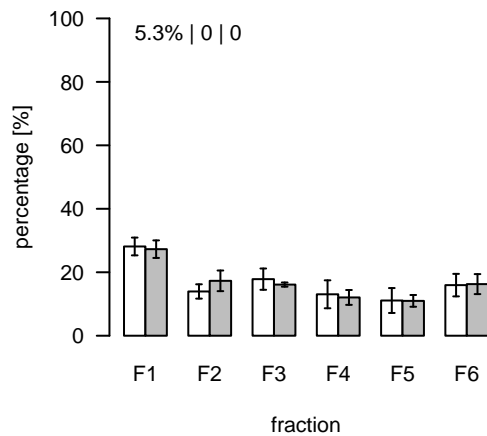

**L397 (m/z=666.473578; rt=4.40641)**  
T/S Cluster: L-4.4-10

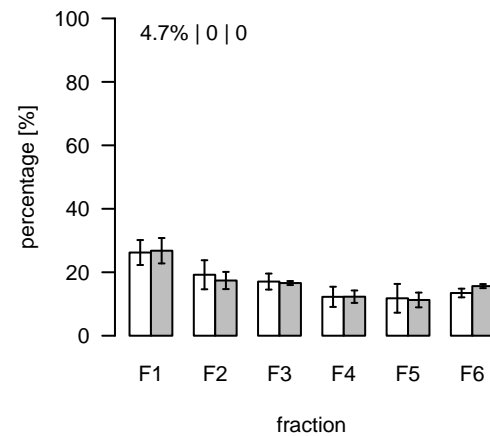

**L398 (m/z=832.541367; rt=4.41949)**  
T/S Cluster: L-4.4-11

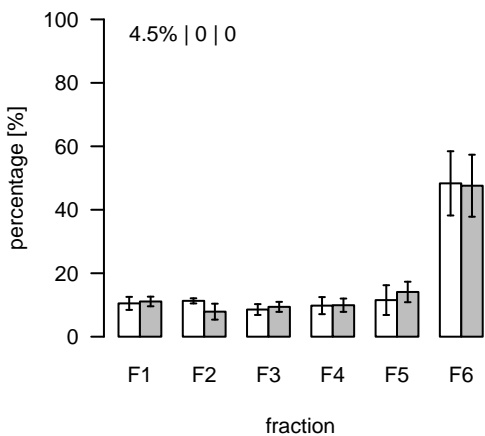

**L401 (m/z=740.495881; rt=4.42094)**  
T/S Cluster: L-4.4-12

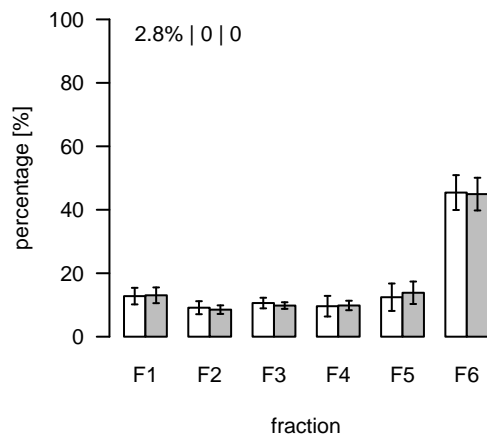

**L399 (m/z=740.475111; rt=4.41972)**  
T/S Cluster: L-4.4-12

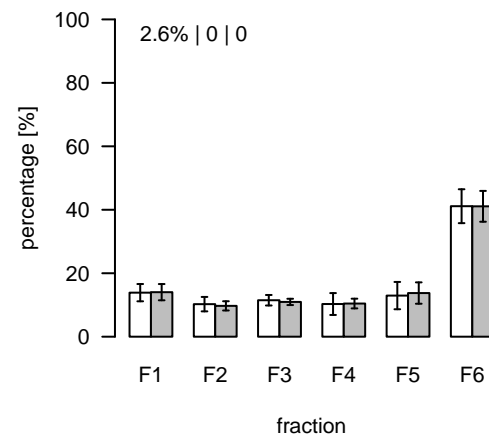

**L402 (m/z=741.497333; rt=4.42134)**  
T/S Cluster: L-4.4-12

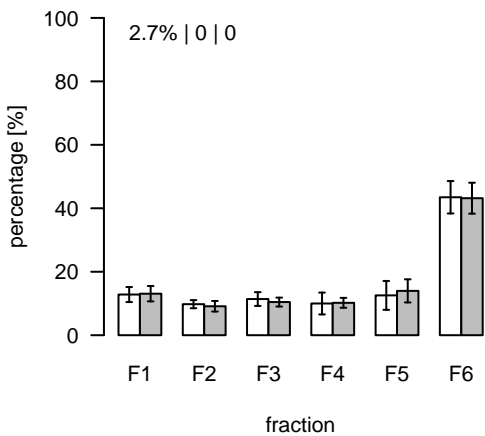

**L400 (m/z=741.483901; rt=4.42041)**  
T/S Cluster: L-4.4-12

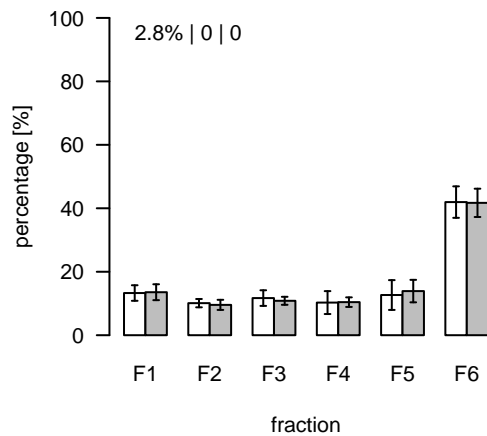

**L403 (m/z=982.602248; rt=4.42349)**  
T/S Cluster: L-4.4-13

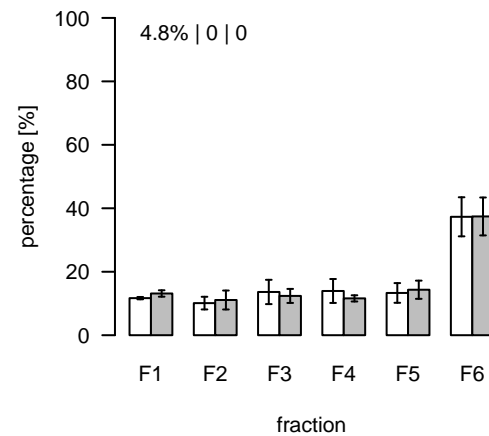

**L404 (m/z=982.634197; rt=4.42422)**  
T/S Cluster: L-4.4-14

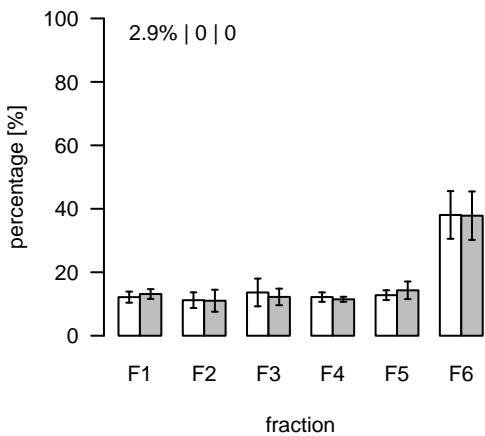

**L407 (m/z=789.551703; rt=4.42614)**  
T/S Cluster: L-4.4-15

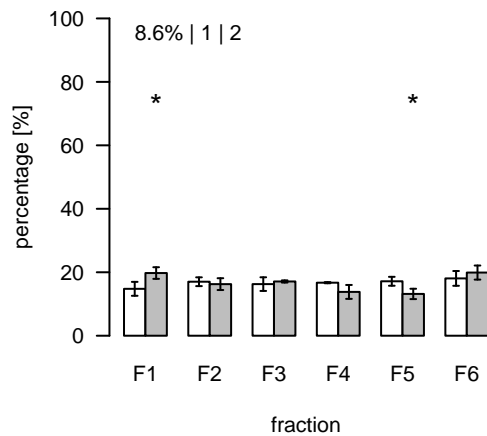

**L409 (m/z=788.547415; rt=4.43023)**  
T/S Cluster: L-4.4-16

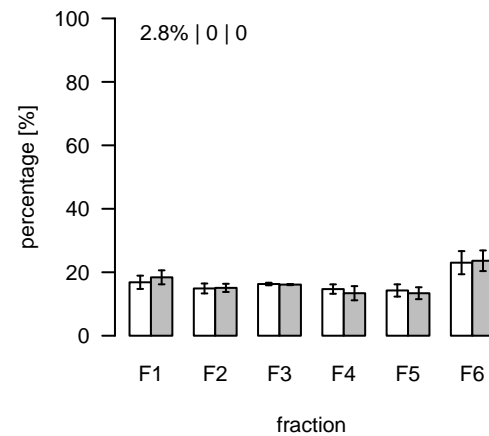

**L410 (m/z=788.547461; rt=4.43023)**  
T/S Cluster: L-4.4-16

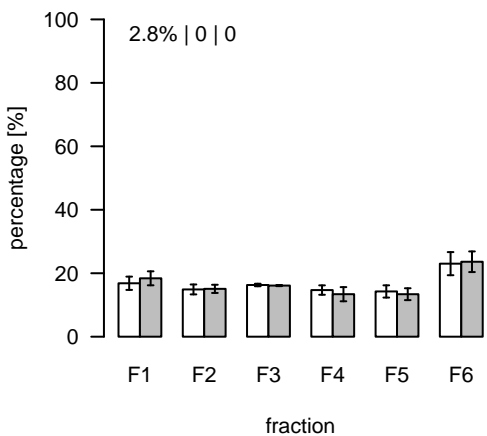

**L413 (m/z=805.582905; rt=4.43096)**  
T/S Cluster: L-4.4-17

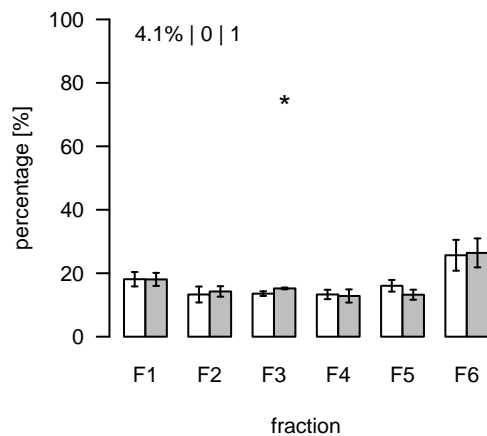

**L418 (m/z=694.4695; rt=4.44016)**  
T/S Cluster: L-4.4-18

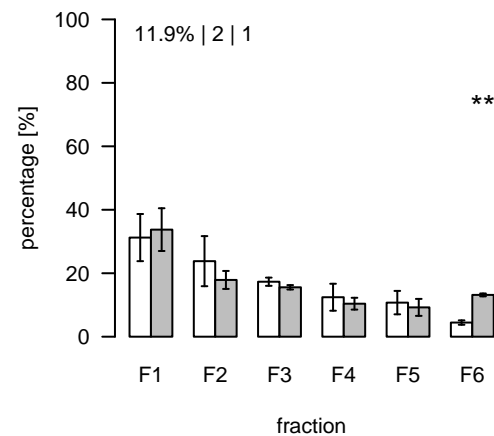

**L419 (m/z=694.446053; rt=4.44017)**  
T/S Cluster: L-4.4-18

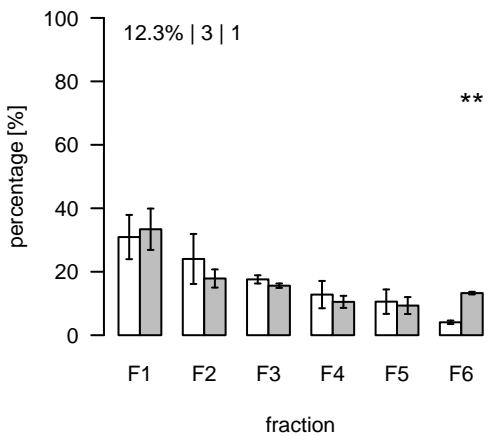

**L417 (m/z=695.472326; rt=4.4398)**  
T/S Cluster: L-4.4-18

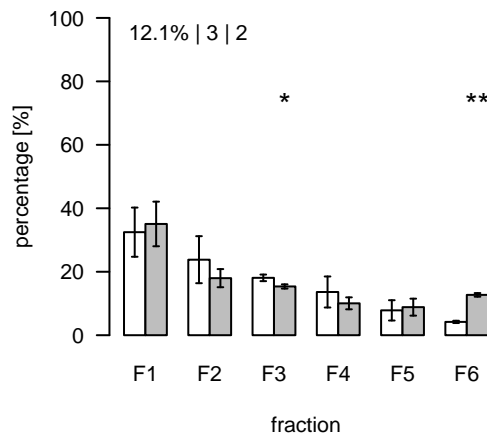

**L424 (m/z=787.507502; rt=4.45464)**  
T/S Cluster: L-4.5-1

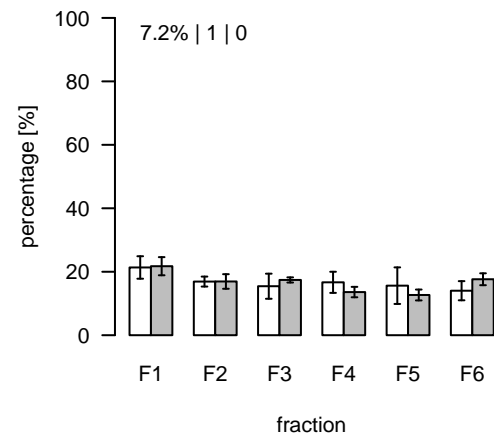

**L425 (m/z=787.536516; rt=4.45528)**  
T/S Cluster: L-4.5-2

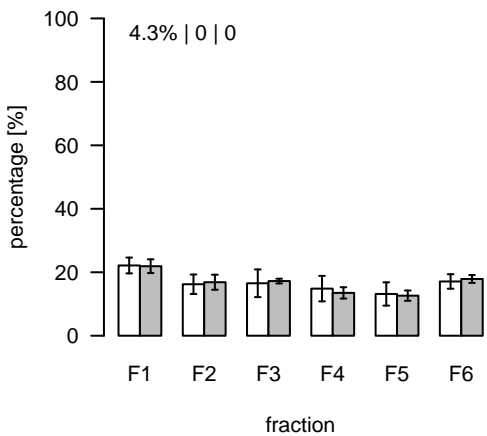

**L440 (m/z=806.558876; rt=4.52927)**  
T/S Cluster: L-4.5-3

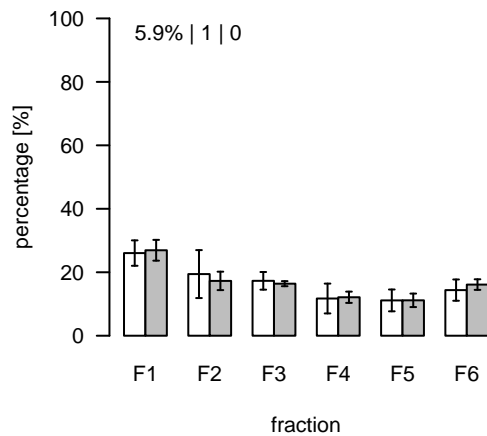

**L441 (m/z=806.53752; rt=4.52932)**  
T/S Cluster: L-4.5-3

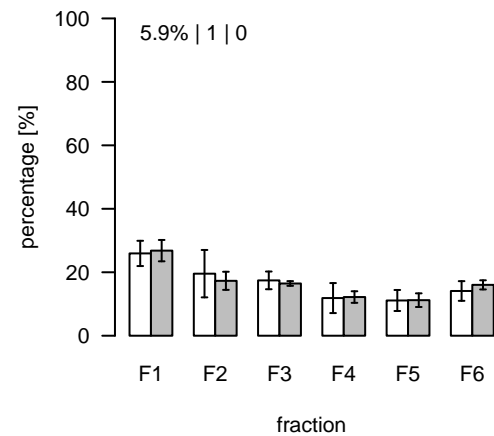

**L444 (m/z=807.567292; rt=4.52954)**  
T/S Cluster: L-4.5-3

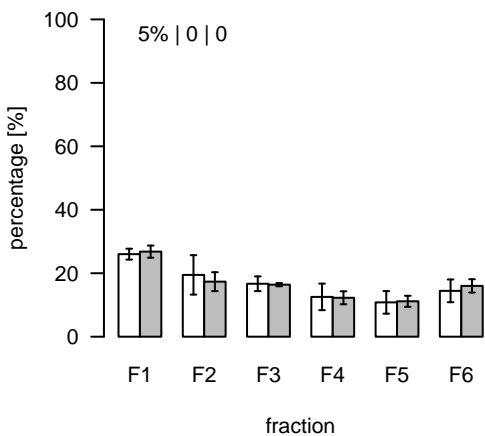

**L442 (m/z=807.545769; rt=4.52948)**  
T/S Cluster: L-4.5-3

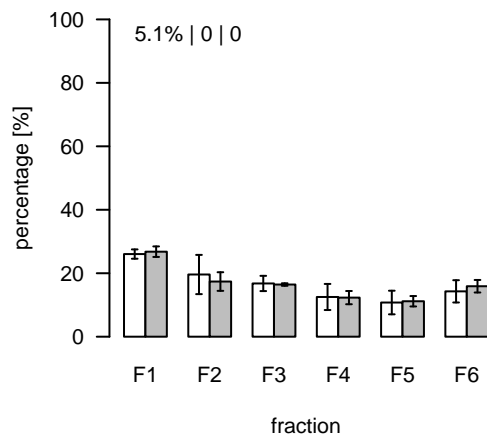

**L426 (m/z=786.533625; rt=4.45641)**  
T/S Cluster: L-4.5-3

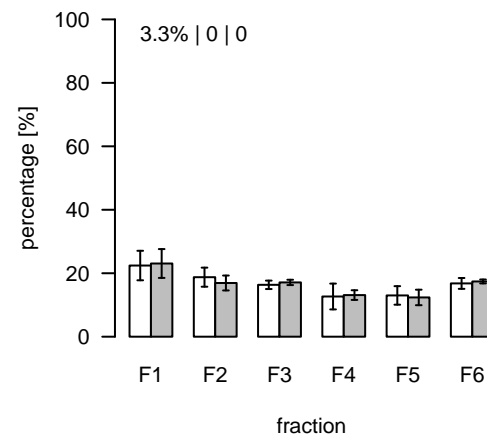

**L428 (m/z=786.513544; rt=4.45657)**  
T/S Cluster: L-4.5-3

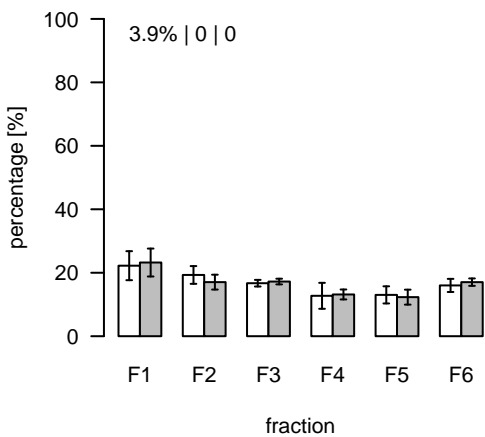

**L427 (m/z=786.500729; rt=4.45655)**  
T/S Cluster: L-4.5-3

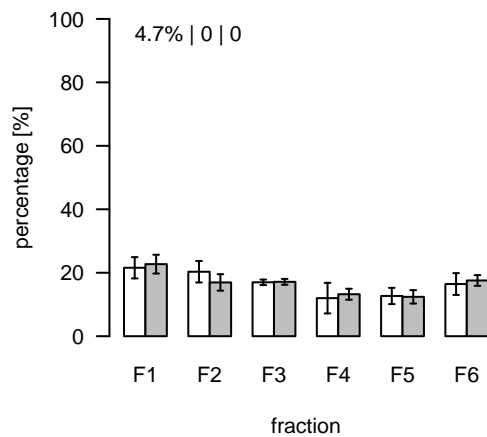

**L443 (m/z=403.280085; rt=4.52952)**  
T/S Cluster: L-4.5-3

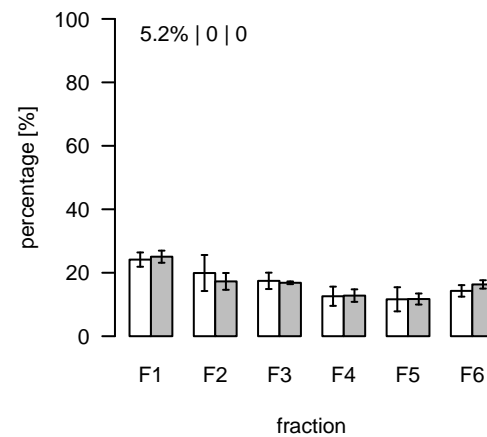

**L430 (m/z=834.591896; rt=4.48554)**  
T/S Cluster: L-4.5-4

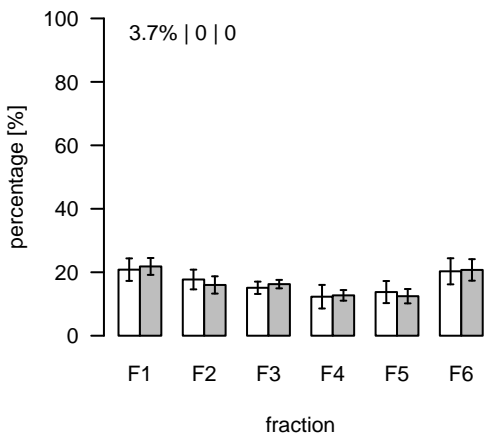

**L429 (m/z=835.594523; rt=4.4844)**  
T/S Cluster: L-4.5-4

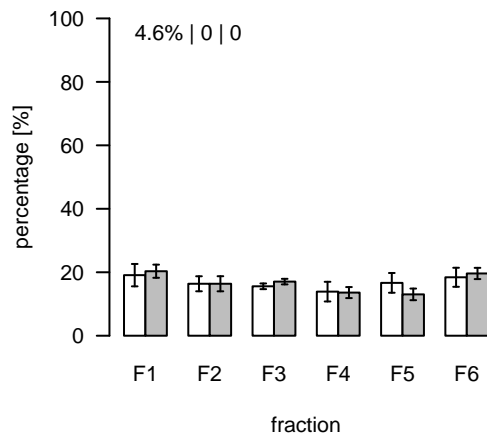

**L431 (m/z=828.542846; rt=4.50201)**  
T/S Cluster: L-4.5-5

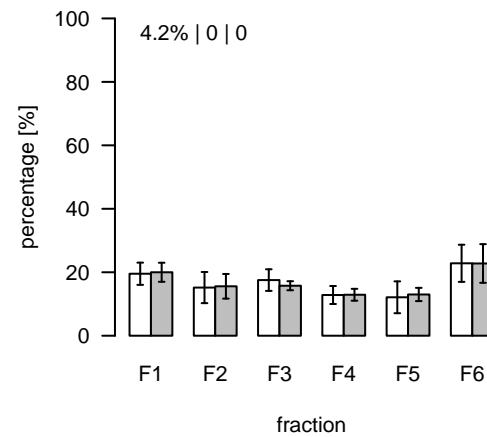

**L432 (m/z=828.554734; rt=4.50322)**  
T/S Cluster: L-4.5-5

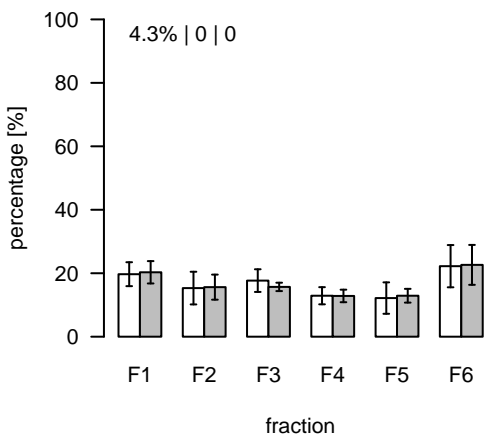

**L433 (m/z=828.532246; rt=4.5065)**  
T/S Cluster: L-4.5-5

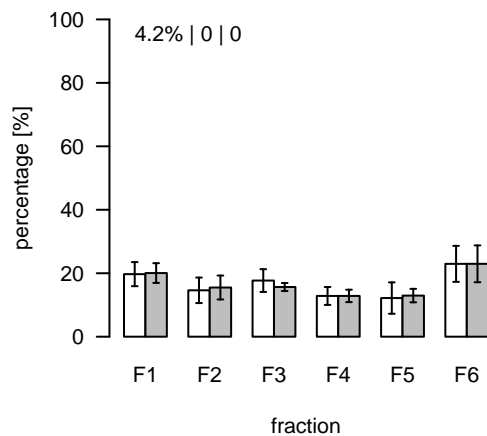

**L437 (m/z=802.527813; rt=4.50699)**  
T/S Cluster: L-4.5-6

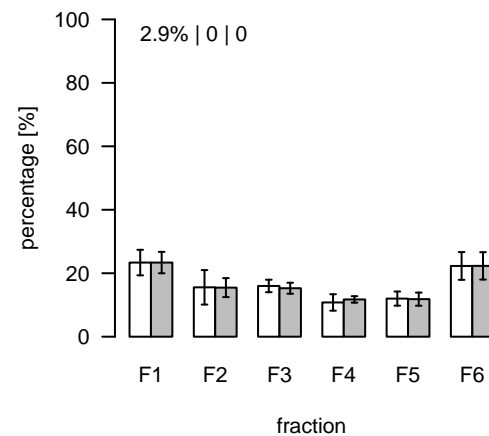

**L445 (m/z=784.506199; rt=4.53304)**  
T/S Cluster: L-4.5-6

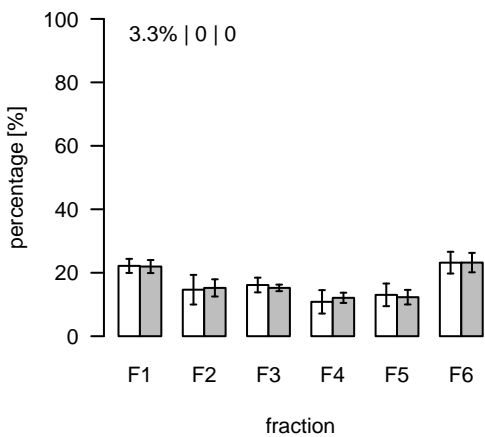

**L446 (m/z=784.519202; rt=4.53317)**  
T/S Cluster: L-4.5-6

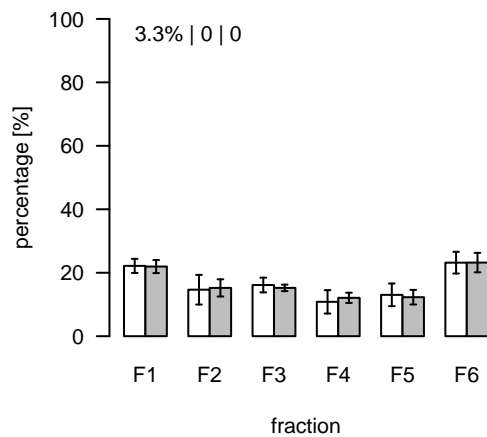

**L435 (m/z=803.53183; rt=4.50669)**  
T/S Cluster: L-4.5-6

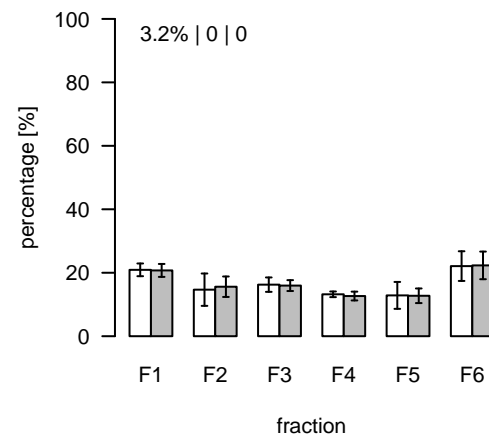

**L434 (m/z=803.509982; rt=4.50667)**  
T/S Cluster: L-4.5-6

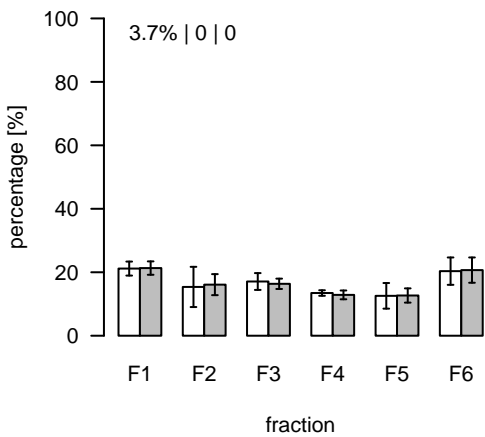

**L436 (m/z=802.496346; rt=4.50679)**  
T/S Cluster: L-4.5-7

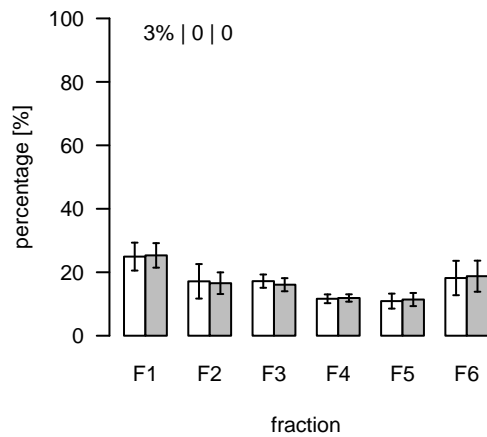

**L449 (m/z=830.527006; rt=4.536)**  
T/S Cluster: L-4.5-8

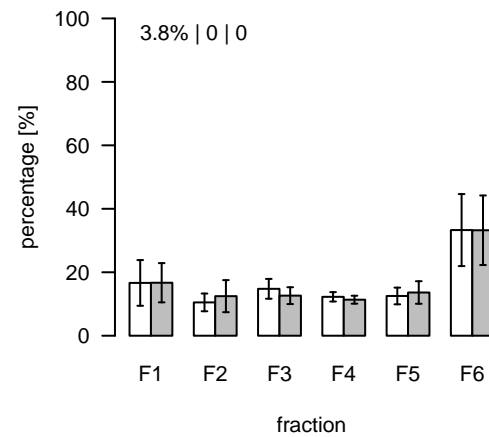



**L438 (m/z=830.552884; rt=4.51603)**  
T/S Cluster: L-4.5-8

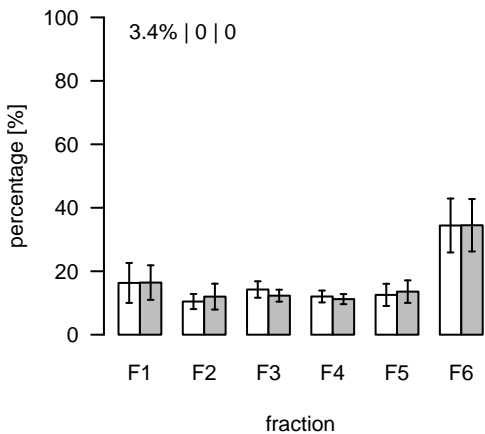

**L439 (m/z=785.519719; rt=4.52764)**  
T/S Cluster: L-4.5-9

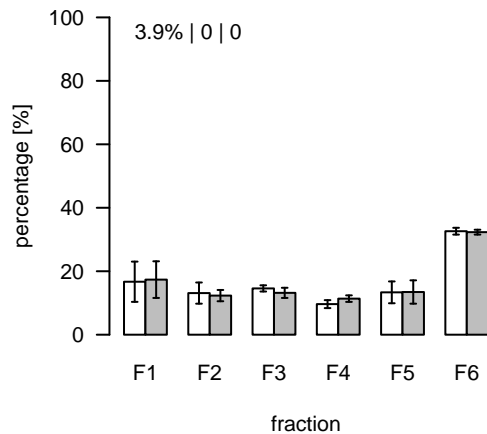

**L450 (m/z=785.488069; rt=4.5426)**  
T/S Cluster: L-4.5-9

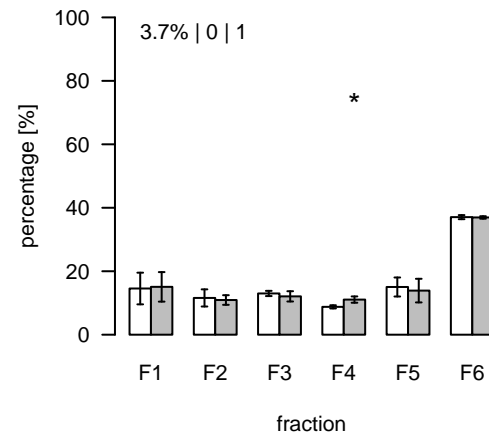

**L447 (m/z=840.533472; rt=4.5346)**  
T/S Cluster: L-4.5-10

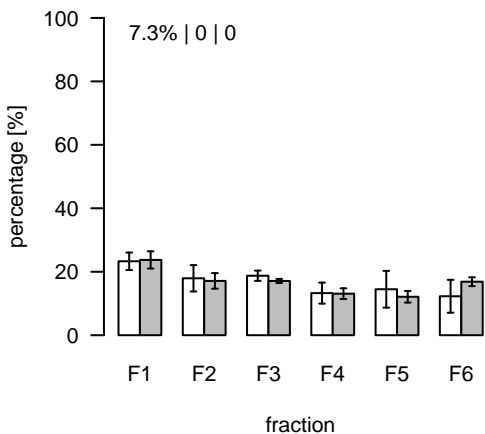

**L448 (m/z=840.523674; rt=4.53532)**  
T/S Cluster: L-4.5-10

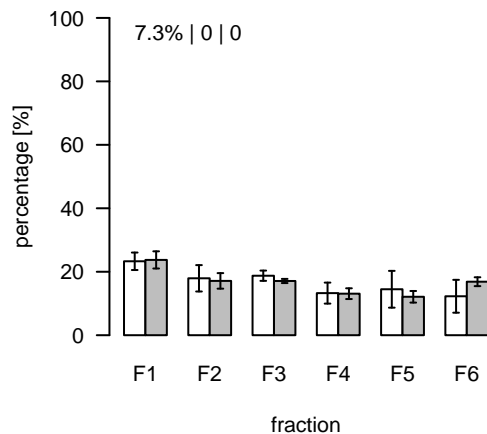

**L451 (m/z=816.581033; rt=4.5497)**  
T/S Cluster: L-4.5-11

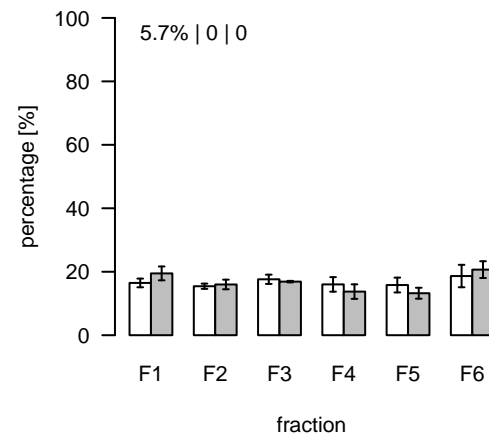

**L453 (m/z=790.517958; rt=4.57223)**  
T/S Cluster: L-4.6-1

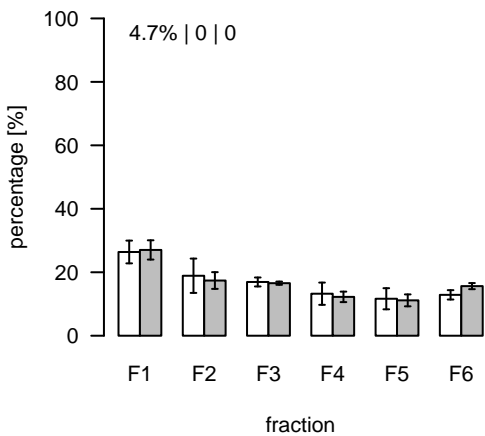

**L452 (m/z=790.543574; rt=4.57147)**  
T/S Cluster: L-4.6-1

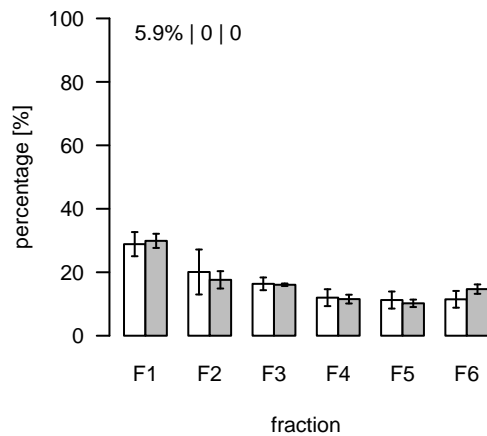

**L454 (m/z=791.525027; rt=4.57228)**  
T/S Cluster: L-4.6-1

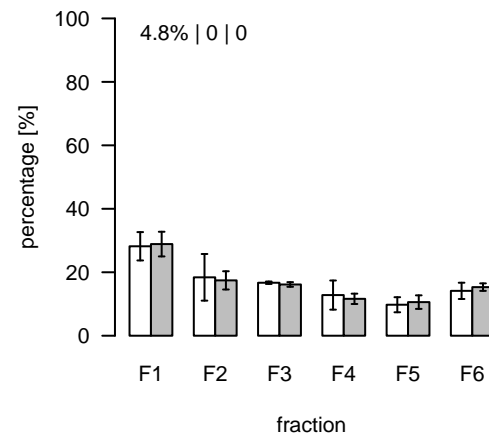

**L455 (m/z=791.526549; rt=4.57265)**  
T/S Cluster: L-4.6-1

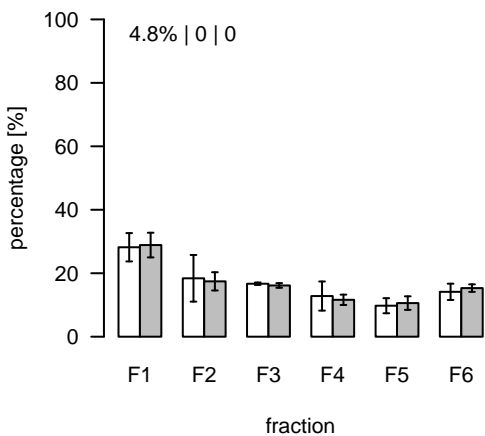

**L456 (m/z=791.545954; rt=4.57343)**  
T/S Cluster: L-4.6-1

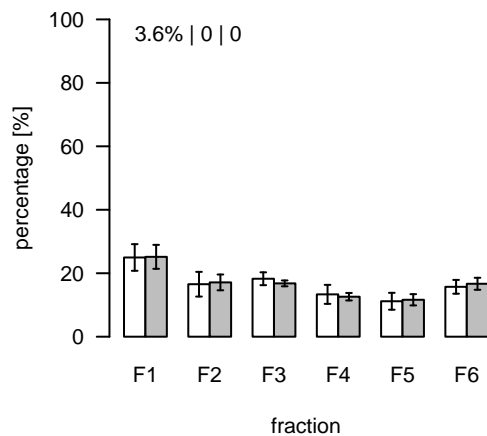

**L457 (m/z=832.577763; rt=4.5818)**  
T/S Cluster: L-4.6-2

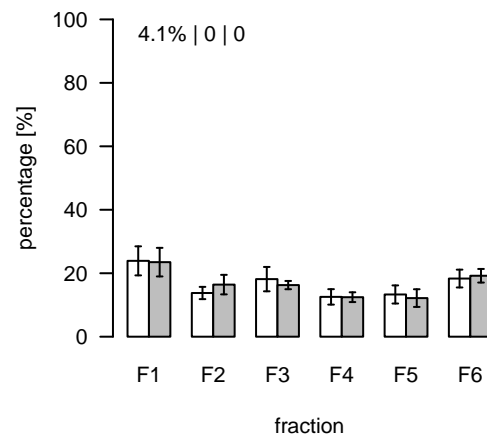

**L461 (m/z=702.473921; rt=4.59548)**  
T/S Cluster: L-4.6-3

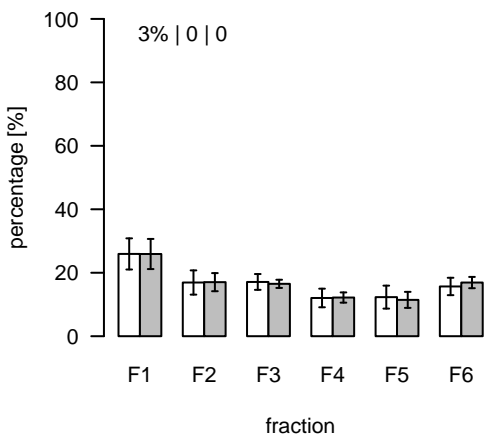

**L458 (m/z=690.473676; rt=4.58216)**  
T/S Cluster: L-4.6-3

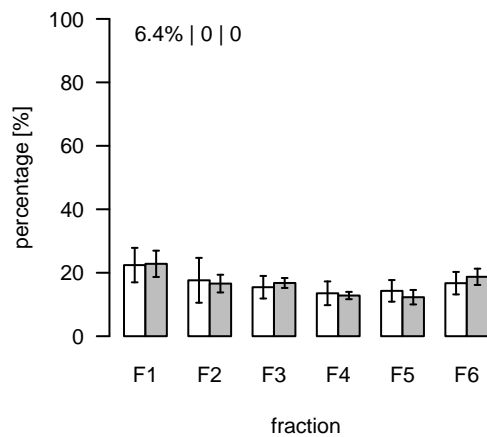

**L460 (m/z=703.478255; rt=4.59419)**  
T/S Cluster: L-4.6-3

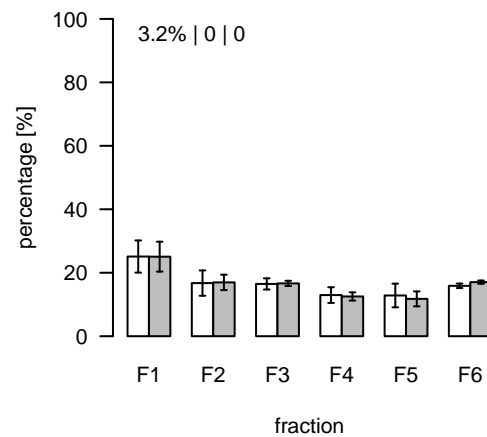

**L459 (m/z=814.566186; rt=4.587)**  
T/S Cluster: L-4.6-4

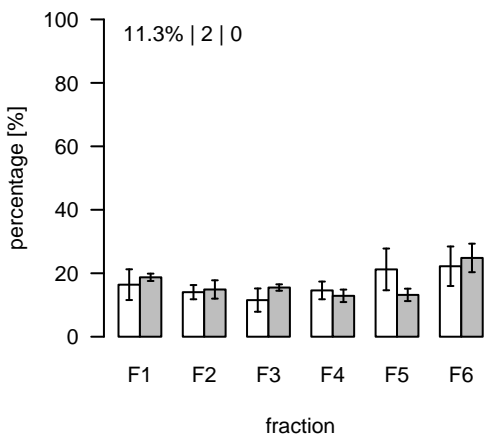

**L463 (m/z=812.549016; rt=4.61247)**  
T/S Cluster: L-4.6-5

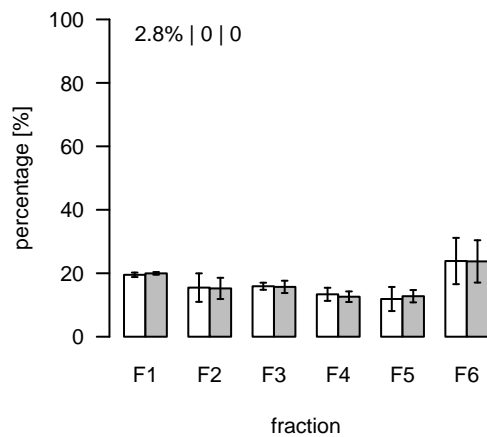

**L465 (m/z=812.524535; rt=4.61686)**  
T/S Cluster: L-4.6-5

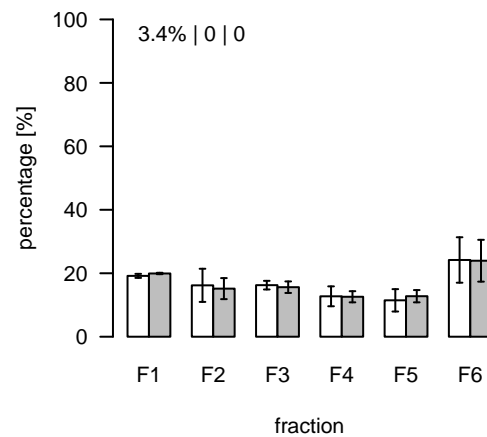

**L462 (m/z=813.552936; rt=4.61126)**  
T/S Cluster: L-4.6-5

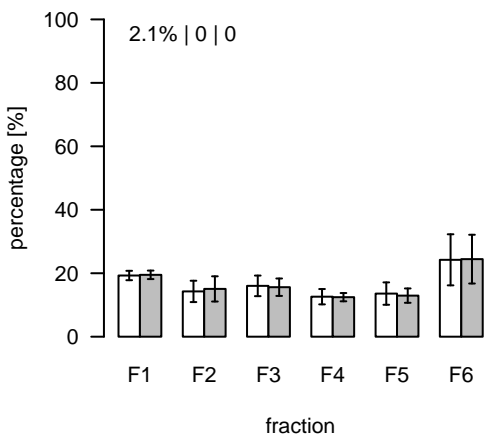

**L464 (m/z=813.532753; rt=4.61316)**  
T/S Cluster: L-4.6-5

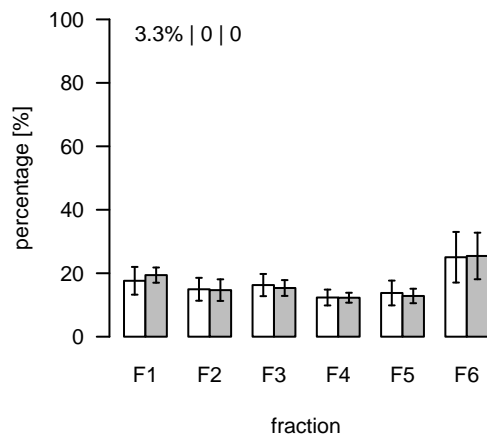

**L468 (m/z=654.335292; rt=4.62217)**  
T/S Cluster: L-4.6-6

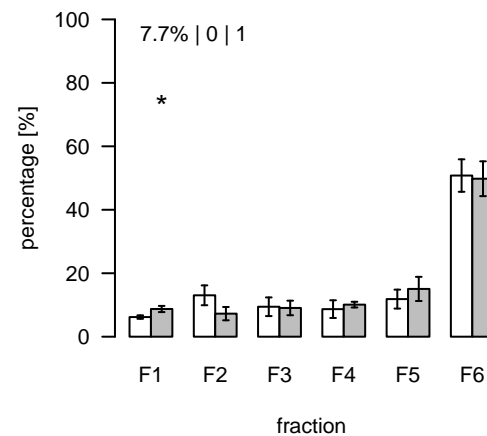

**L469 (m/z=654.3202; rt=4.62222)**  
T/S Cluster: L-4.6-6

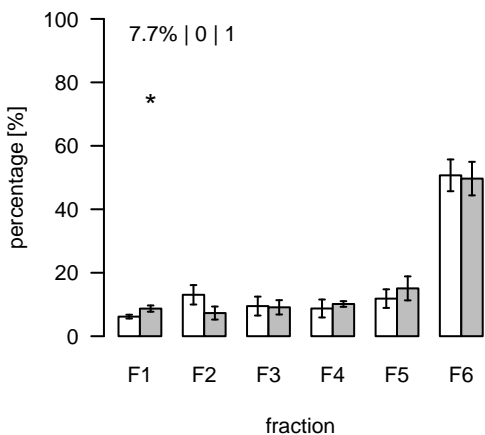

**L467 (m/z=655.341099; rt=4.62179)**  
T/S Cluster: L-4.6-6

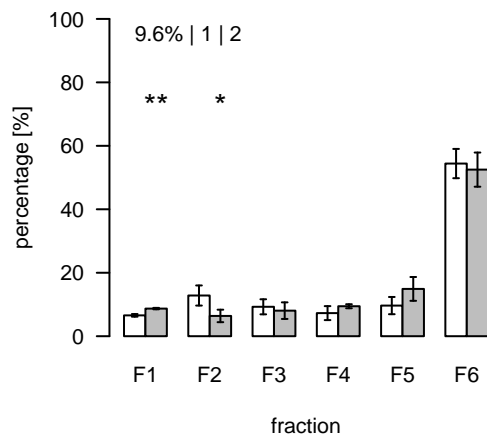

**L466 (m/z=655.327482; rt=4.62176)**  
T/S Cluster: L-4.6-6

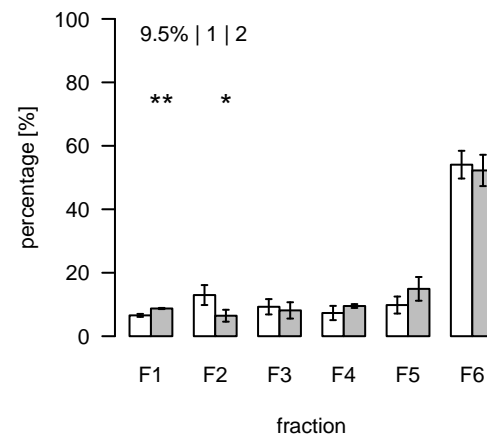

**L470 (m/z=682.366845; rt=4.62285)**  
T/S Cluster: L-4.6-7

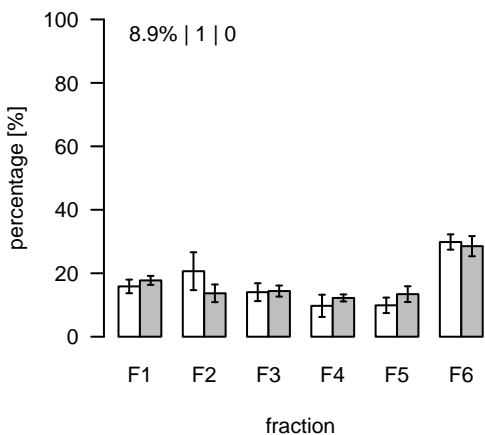

**L471 (m/z=832.565407; rt=4.62405)**  
T/S Cluster: L-4.6-8

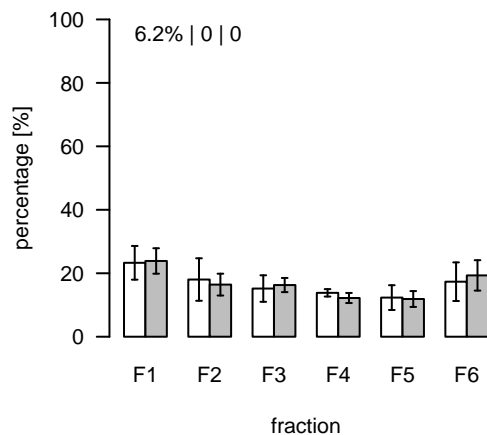

**L472 (m/z=814.566896; rt=4.64567)**  
T/S Cluster: L-4.6-9

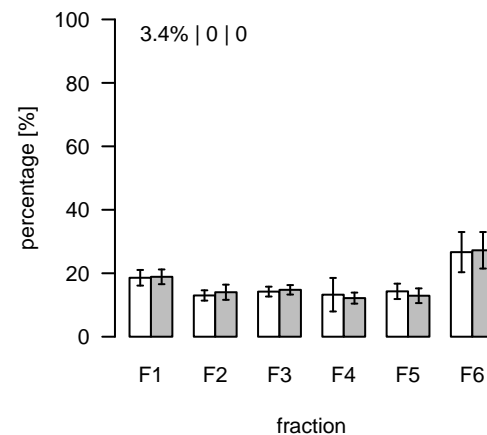

**L475 (m/z=814.563796; rt=4.64632)**  
T/S Cluster: L-4.6-9

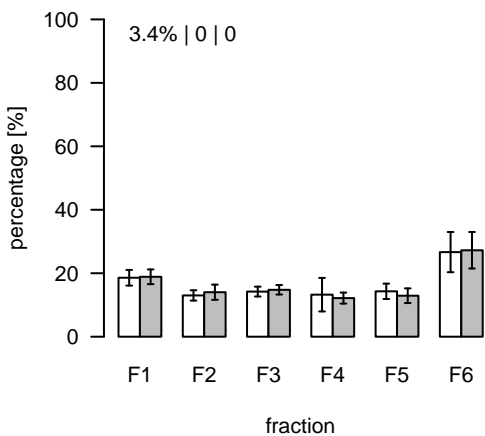

**L477 (m/z=814.544329; rt=4.64688)**  
T/S Cluster: L-4.6-9

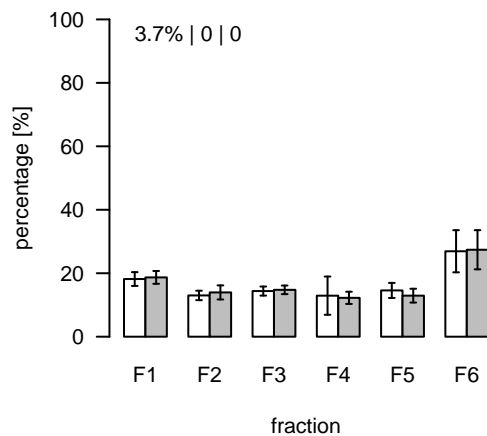

**L473 (m/z=814.598303; rt=4.64612)**  
T/S Cluster: L-4.6-9

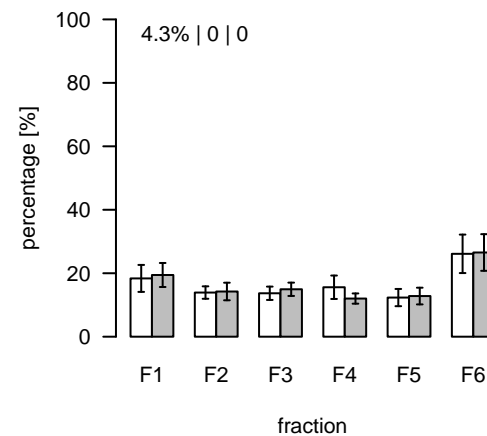

**L474 (m/z=815.567381; rt=4.64622)**  
T/S Cluster: L-4.6-10

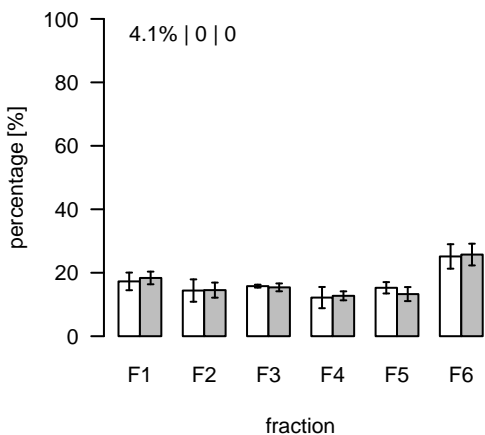

**L476 (m/z=815.567378; rt=4.64649)**  
T/S Cluster: L-4.6-10

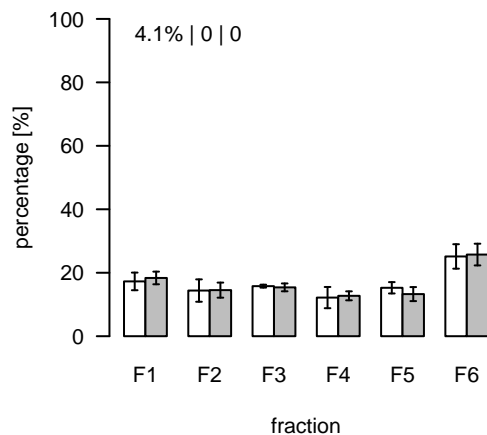

**L480 (m/z=716.490424; rt=4.6594)**  
T/S Cluster: L-4.7-1

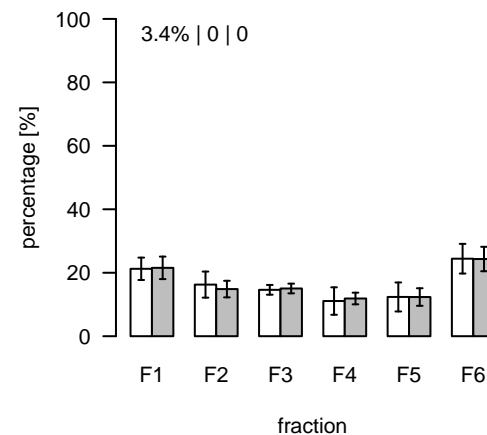

**L479 (m/z=716.467353; rt=4.65931)**  
T/S Cluster: L-4.7-1

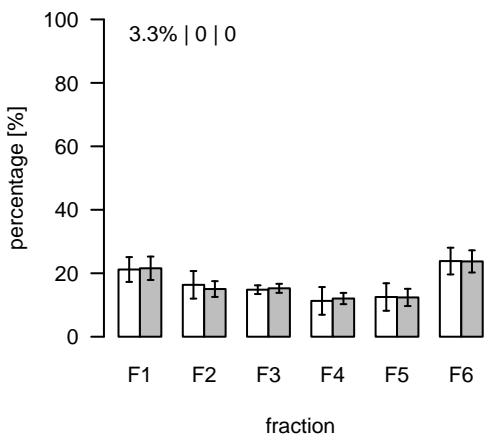

**L481 (m/z=717.495229; rt=4.65952)**  
T/S Cluster: L-4.7-1

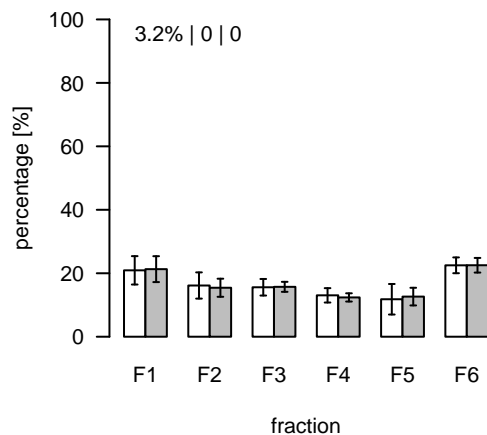

**L482 (m/z=717.475541; rt=4.65971)**  
T/S Cluster: L-4.7-1

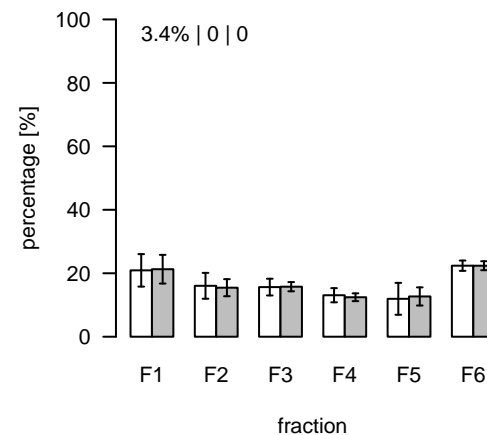

**L489 (m/z=789.550473; rt=4.72916)**  
T/S Cluster: L-4.7-1

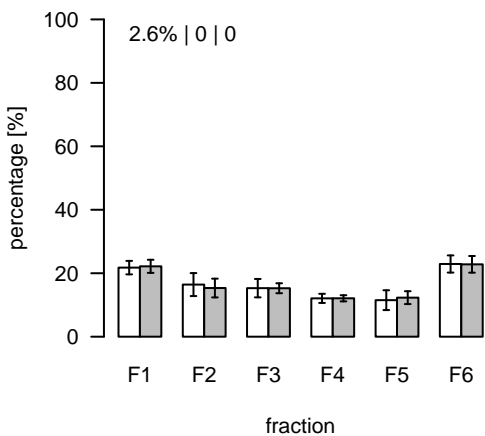

**L478 (m/z=358.245487; rt=4.65895)**  
T/S Cluster: L-4.7-1

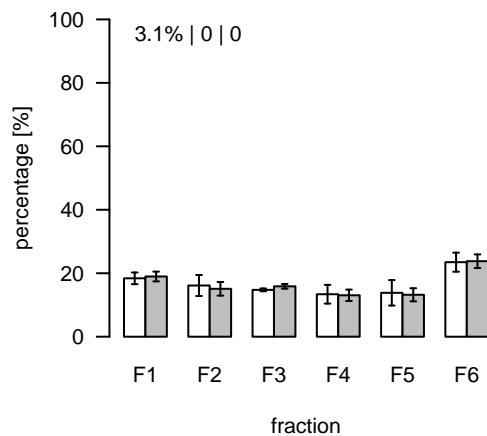

**L483 (m/z=964.623494; rt=4.67873)**  
T/S Cluster: L-4.7-2

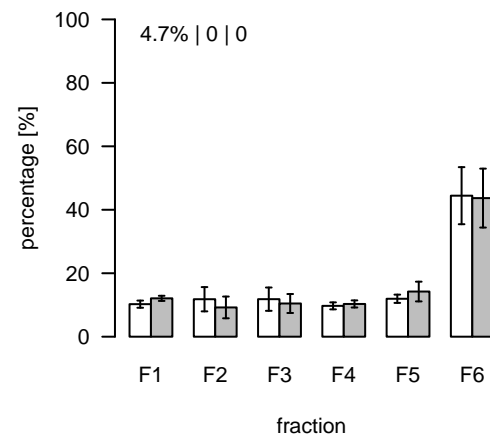

**L484 (m/z=790.567767; rt=4.68055)**  
T/S Cluster: L-4.7-3

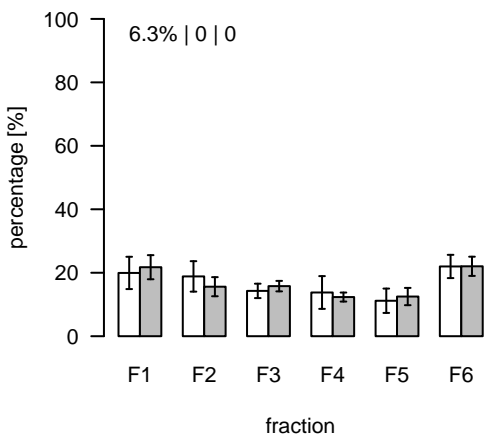

**L485 (m/z=790.551231; rt=4.68213)**  
T/S Cluster: L-4.7-3

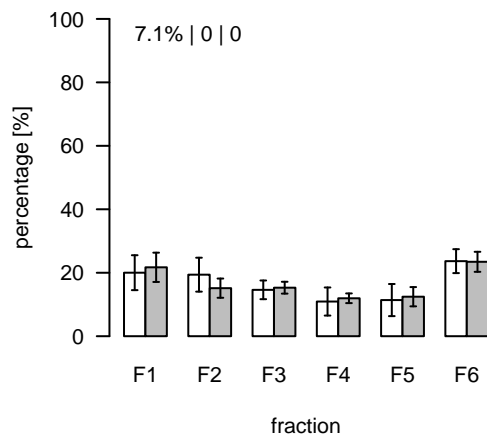

**L487 (m/z=810.528834; rt=4.69109)**  
T/S Cluster: L-4.7-4

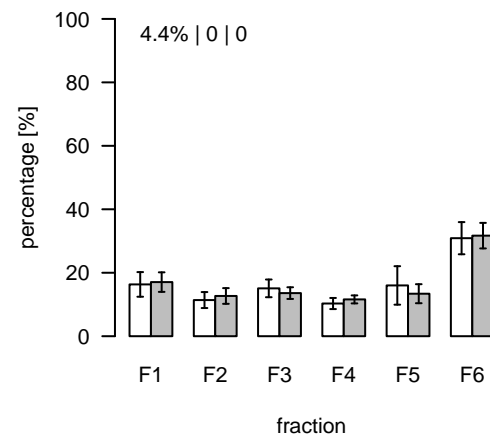

**L486 (m/z=810.554675; rt=4.69039)**  
T/S Cluster: L-4.7-4

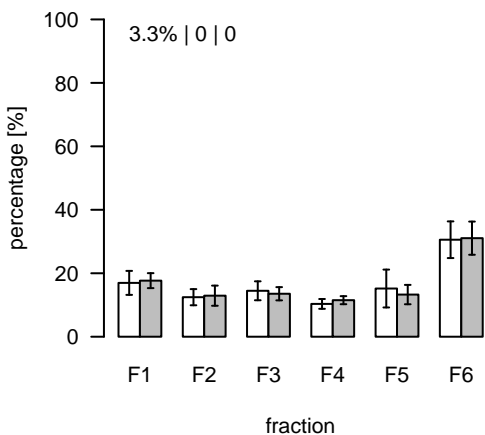

**L488 (m/z=820.515641; rt=4.70551)**  
T/S Cluster: L-4.7-5

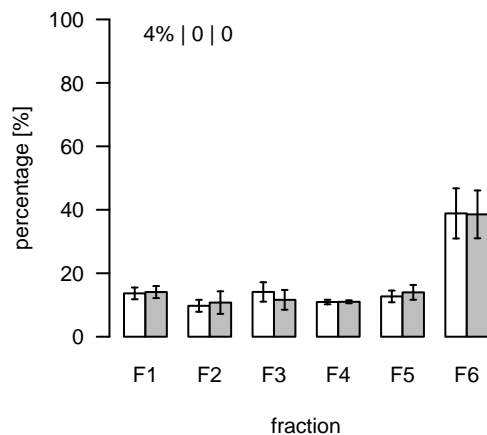

**L490 (m/z=788.591712; rt=4.72925)**  
T/S Cluster: L-4.7-6

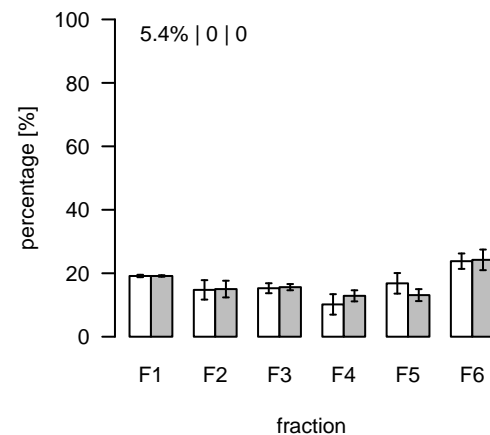

**L491 (m/z=788.547762; rt=4.73069)**  
T/S Cluster: L-4.7-7

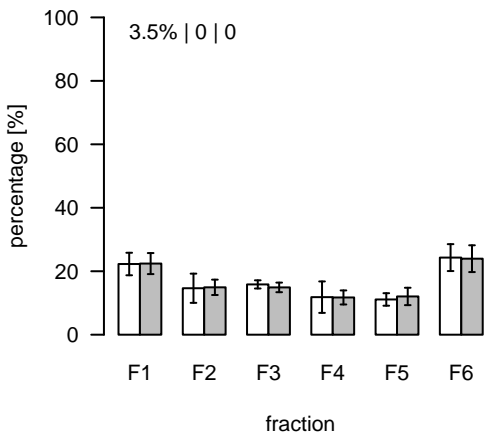

**L493 (m/z=892.57477; rt=4.74184)**  
T/S Cluster: L-4.7-8

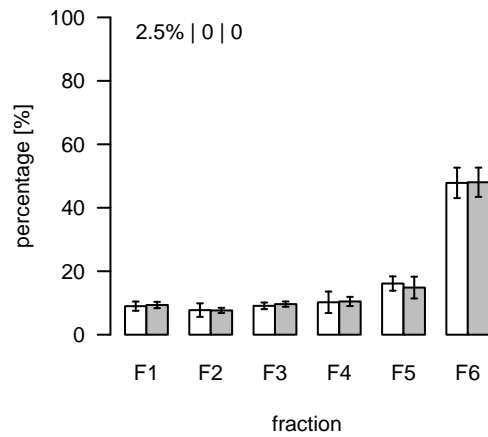

**L492 (m/z=892.549887; rt=4.74176)**  
T/S Cluster: L-4.7-8

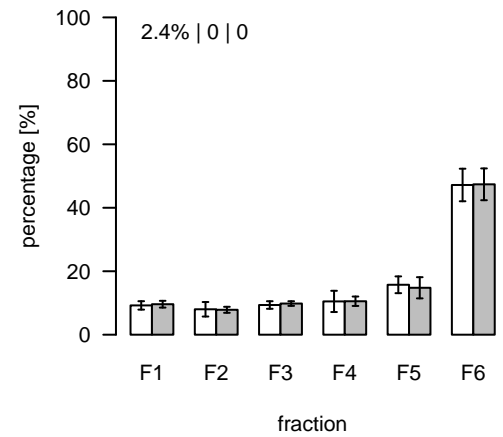

**L494 (m/z=774.530527; rt=4.74892)**  
T/S Cluster: L-4.7-9

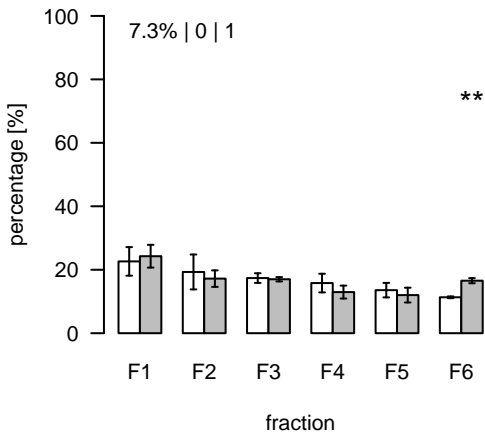

**L495 (m/z=774.531637; rt=4.74897)**  
T/S Cluster: L-4.7-9

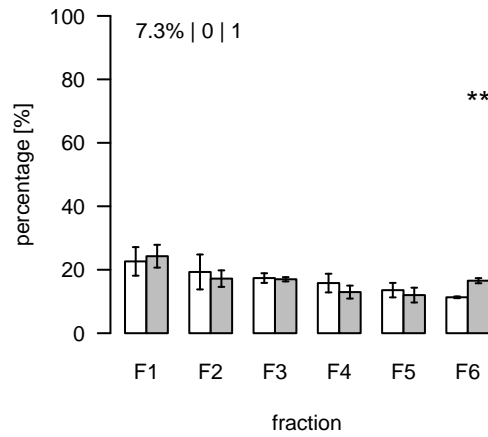

**L496 (m/z=774.563392; rt=4.753)**  
T/S Cluster: L-4.8-1

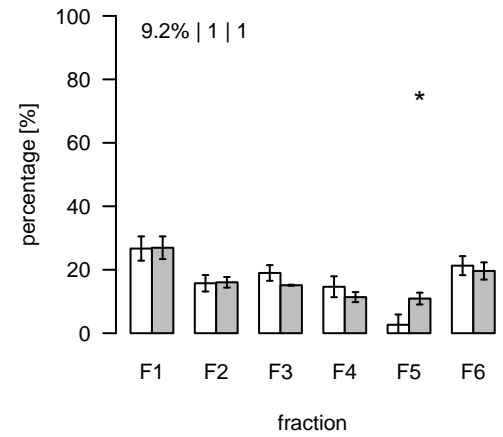

**L504 (m/z=716.490613; rt=4.75652)**  
T/S Cluster: L-4.8-2

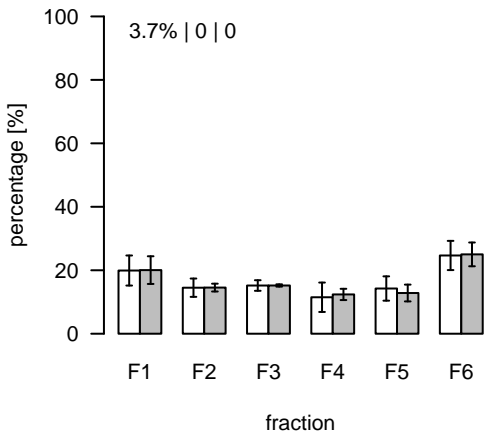

**L503 (m/z=716.466985; rt=4.75651)**  
T/S Cluster: L-4.8-2

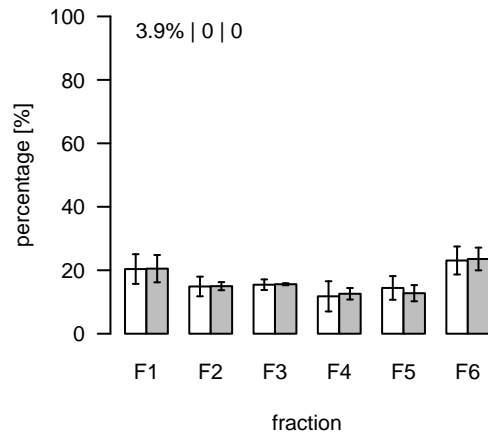

**L500 (m/z=717.495534; rt=4.75643)**  
T/S Cluster: L-4.8-2

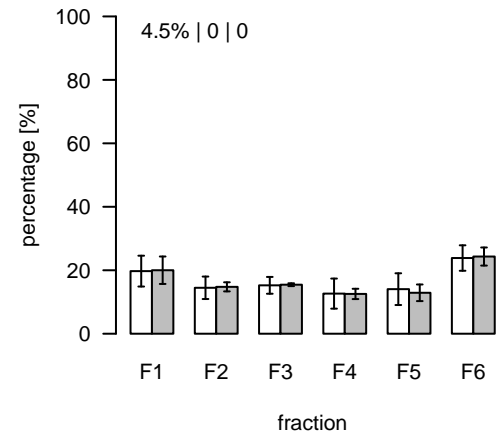

**L502 (m/z=717.475129; rt=4.75648)**  
T/S Cluster: L-4.8-2

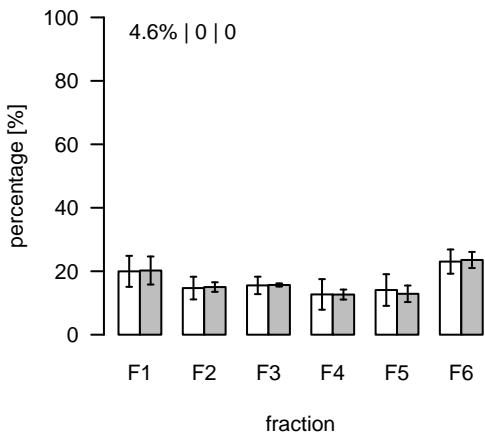

**L501 (m/z=358.245647; rt=4.75648)**  
T/S Cluster: L-4.8-2

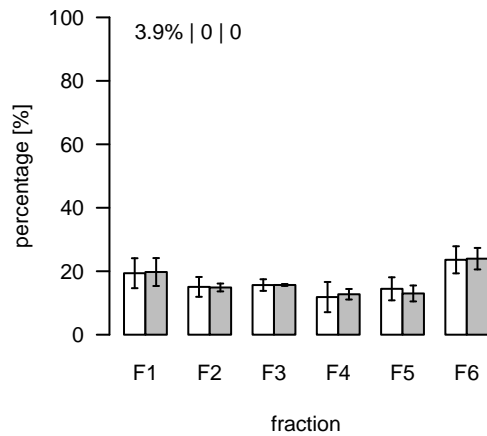

**L499 (m/z=718.496493; rt=4.75592)**  
T/S Cluster: L-4.8-2

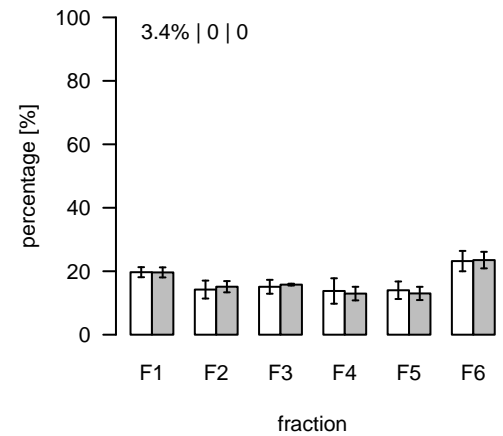

**L497 (m/z=718.486128; rt=4.75589)**  
T/S Cluster: L-4.8-2

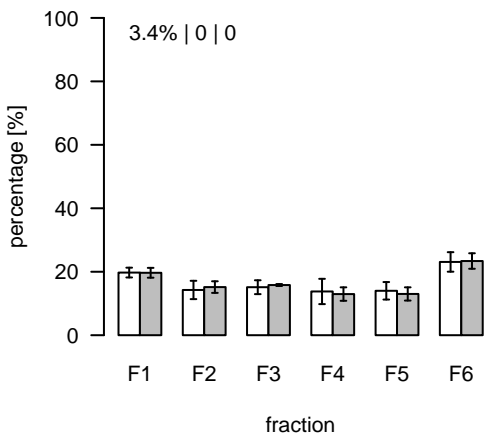

**L498 (m/z=358.747454; rt=4.7559)**  
T/S Cluster: L-4.8-2

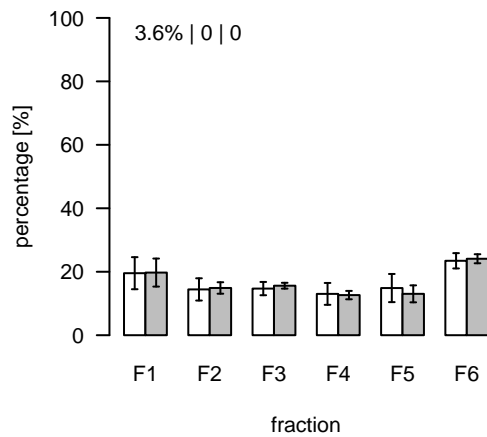

**L553 (m/z=783.469576; rt=4.8356)**  
T/S Cluster: L-4.8-3

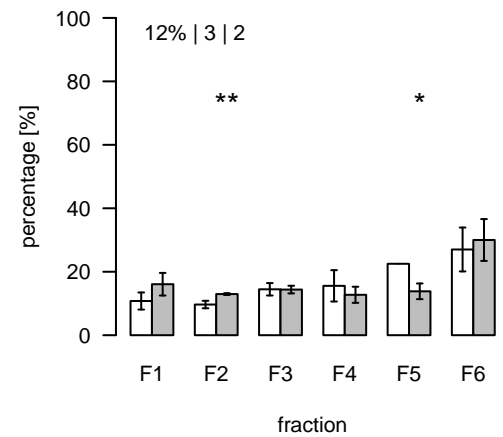

**L517 (m/z=785.47504; rt=4.79753)**  
T/S Cluster: L-4.8-3

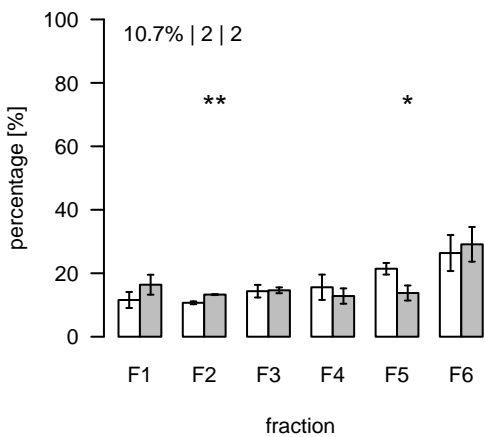

**L518 (m/z=785.494043; rt=4.79813)**  
T/S Cluster: L-4.8-3

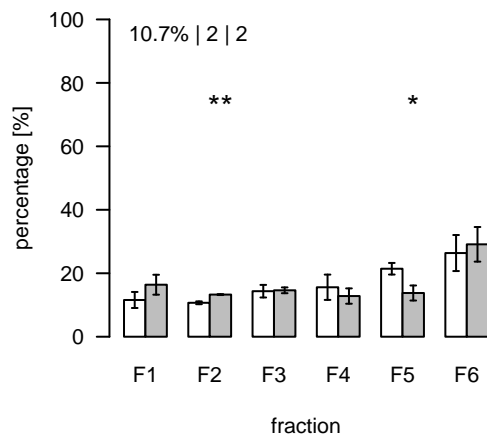

**L545 (m/z=784.47138; rt=4.83394)**  
T/S Cluster: L-4.8-3

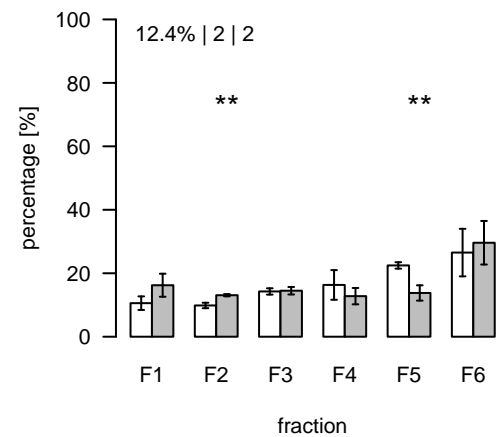

**L515 (m/z=786.483892; rt=4.79151)**  
T/S Cluster: L-4.8-3

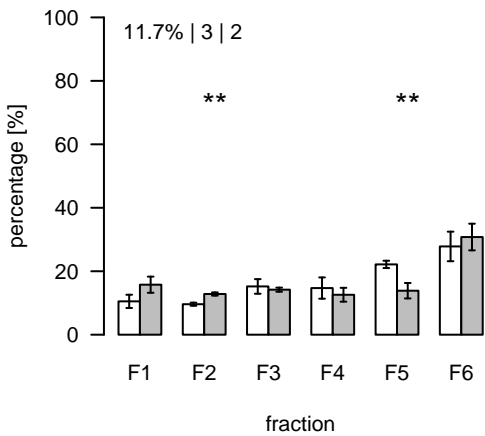

**L510 (m/z=786.507196; rt=4.78247)**  
T/S Cluster: L-4.8-3

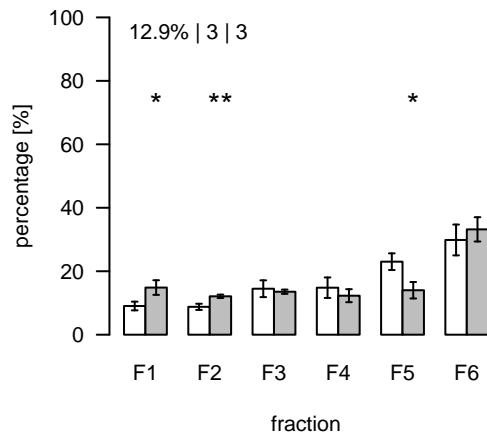

**L505 (m/z=787.518637; rt=4.75843)**  
T/S Cluster: L-4.8-3

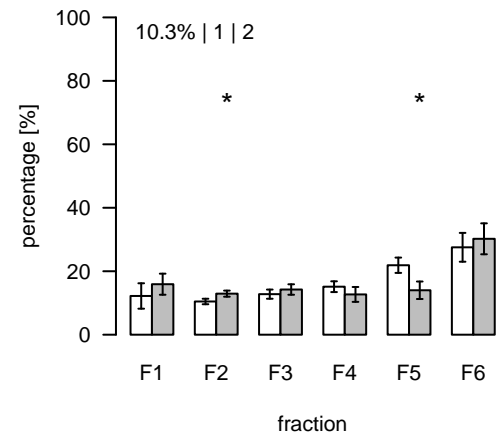

**L552 (m/z=391.735645; rt=4.83558)**  
T/S Cluster: L-4.8-3

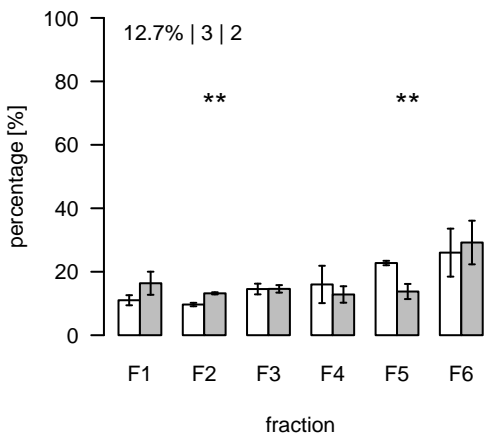

**L512 (m/z=787.486257; rt=4.78656)**  
T/S Cluster: L-4.8-3

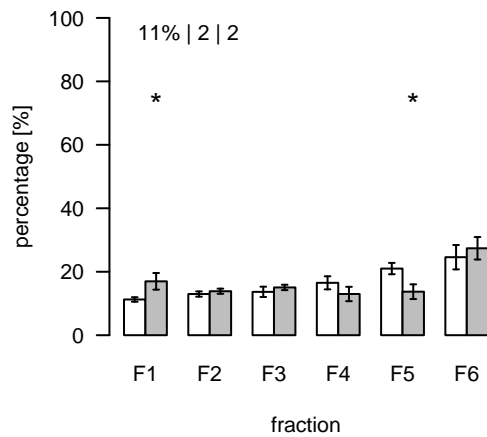

**L506 (m/z=784.526098; rt=4.76814)**  
T/S Cluster: L-4.8-4

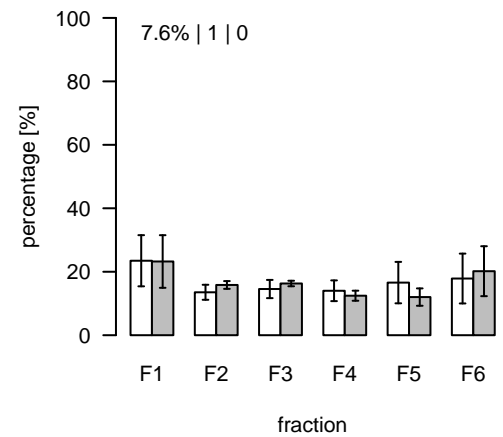

**L508 (m/z=804.546739; rt=4.77266)**  
T/S Cluster: L-4.8-5

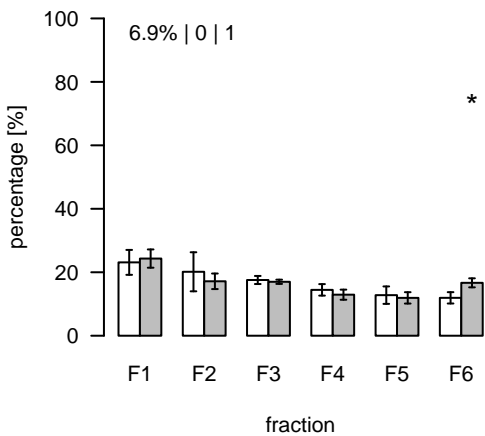

**L507 (m/z=804.525086; rt=4.77216)**  
T/S Cluster: L-4.8-5

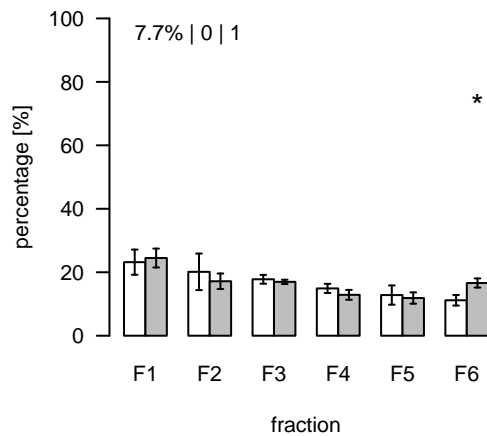

**L509 (m/z=805.546835; rt=4.77347)**  
T/S Cluster: L-4.8-6

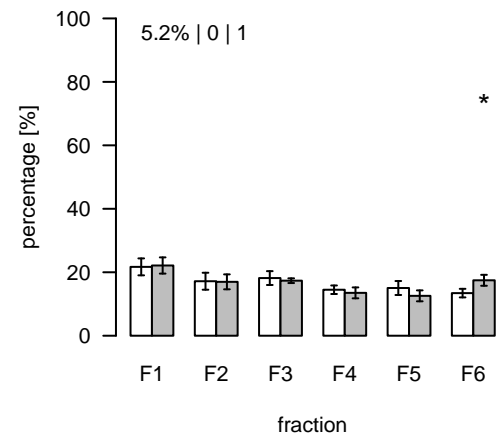



**L516 (m/z=826.538869; rt=4.79283)**  
T/S Cluster: L-4.8-7

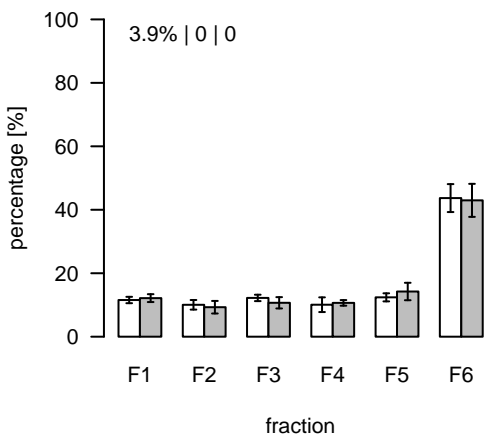

**L511 (m/z=826.52302; rt=4.78467)**  
T/S Cluster: L-4.8-7

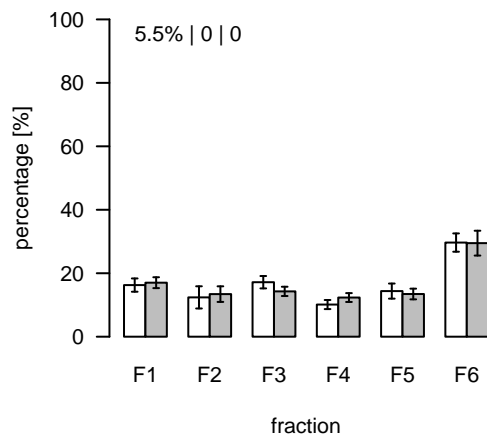

**L513 (m/z=392.743865; rt=4.78876)**  
T/S Cluster: L-4.8-8

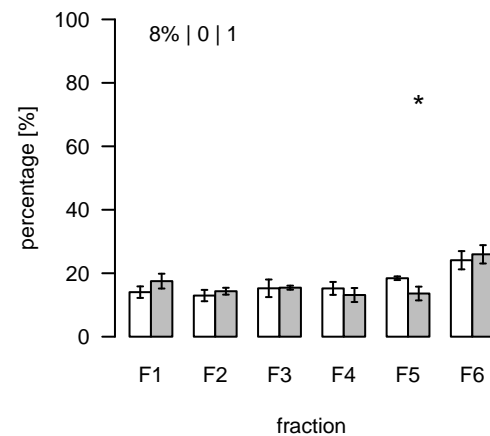

**L514 (m/z=801.457779; rt=4.7914)**  
T/S Cluster: L-4.8-9

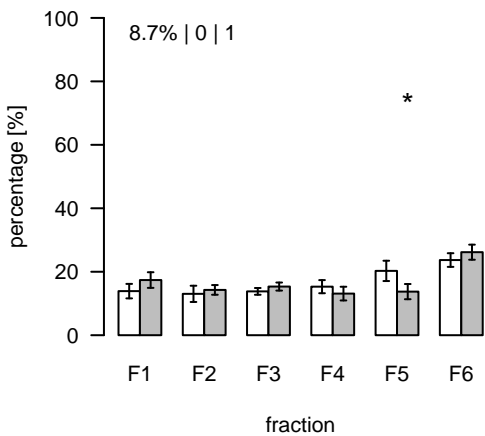

**L532 (m/z=780.528128; rt=4.81081)**  
T/S Cluster: L-4.8-10

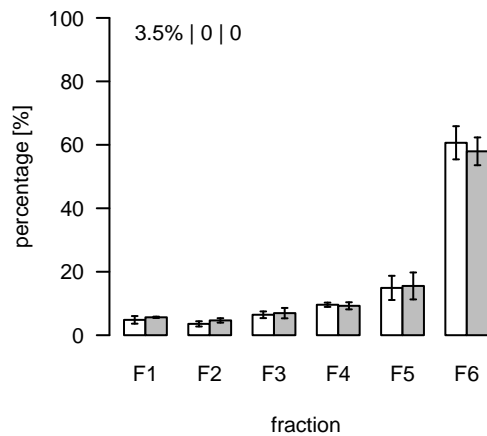

**L555 (m/z=778.514556; rt=4.83582)**  
T/S Cluster: L-4.8-10

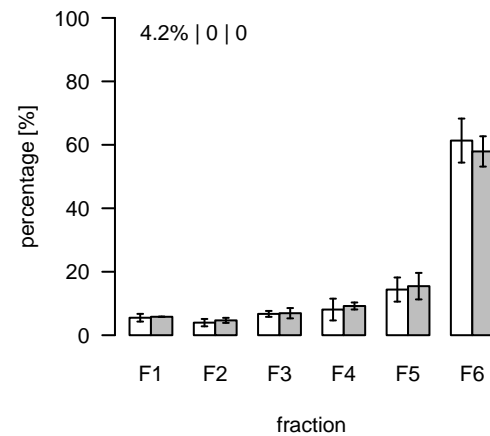

**L528 (m/z=781.533075; rt=4.80941)**  
T/S Cluster: L-4.8-10

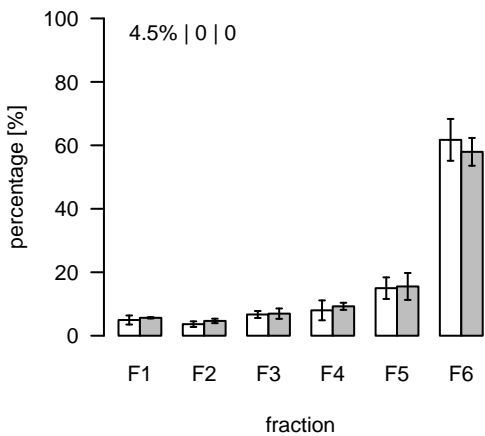

**L551 (m/z=779.518897; rt=4.83557)**  
T/S Cluster: L-4.8-10

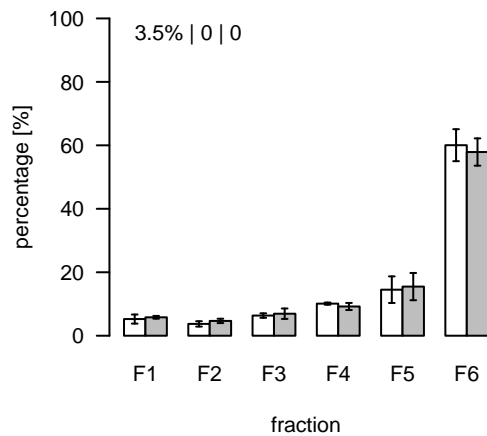

**L549 (m/z=779.489377; rt=4.83552)**  
T/S Cluster: L-4.8-10

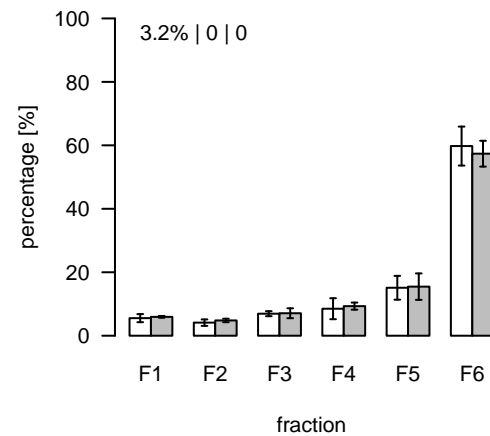

**L526 (m/z=782.53676; rt=4.80873)**  
T/S Cluster: L-4.8-10

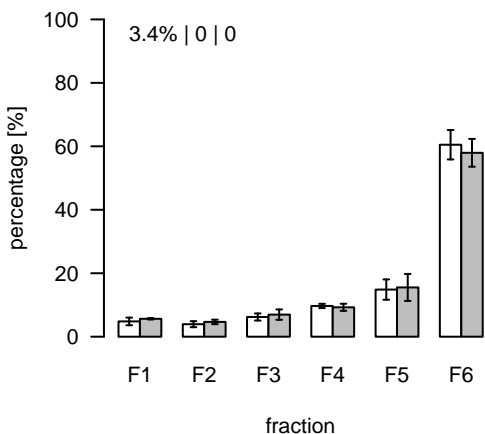

**L525 (m/z=390.265432; rt=4.80859)**  
T/S Cluster: L-4.8-10

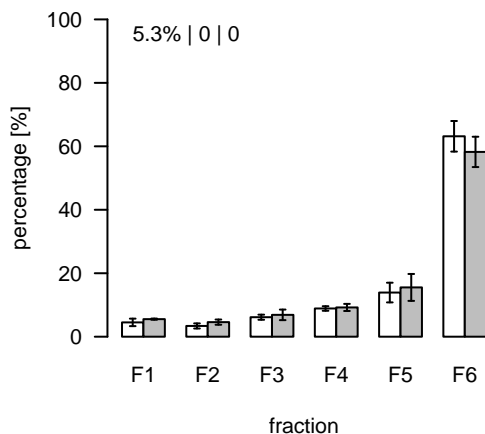

**L546 (m/z=389.258146; rt=4.83539)**  
T/S Cluster: L-4.8-10

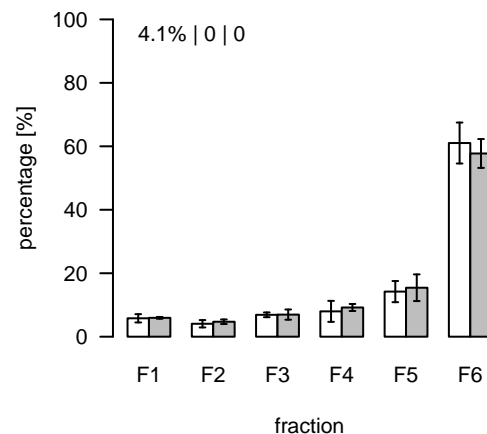

**L531 (m/z=780.472015; rt=4.81072)**  
T/S Cluster: L-4.8-10

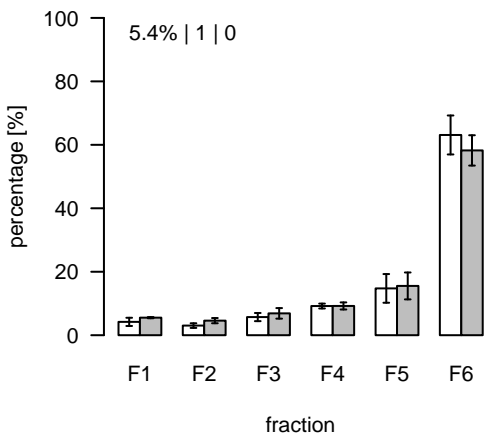

**L547 (m/z=778.455723; rt=4.83541)**  
T/S Cluster: L-4.8-10

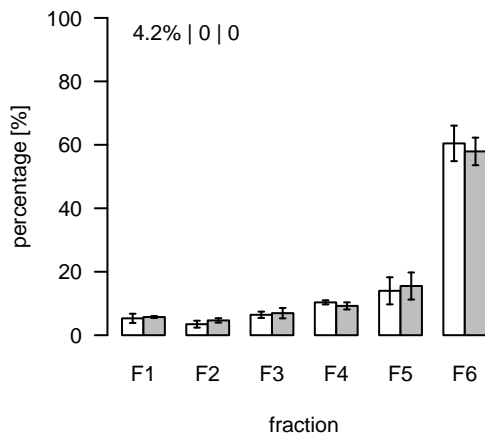

**L533 (m/z=583.439282; rt=4.81096)**  
T/S Cluster: L-4.8-10

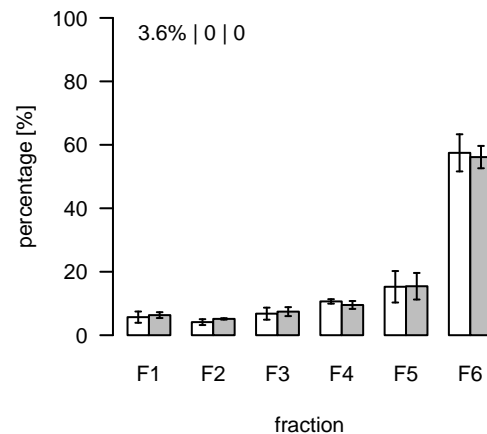

**L524 (m/z=782.504008; rt=4.80826)**  
T/S Cluster: L-4.8-10

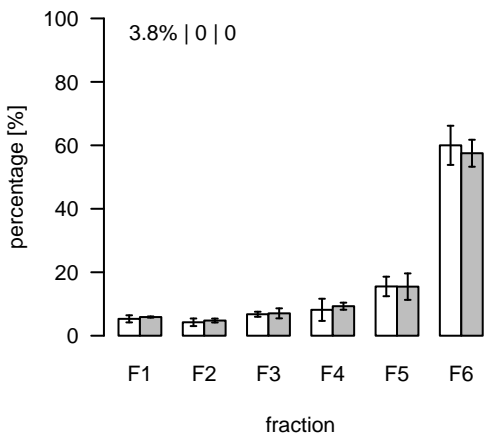

**L522 (m/z=781.477023; rt=4.80729)**  
T/S Cluster: L-4.8-10

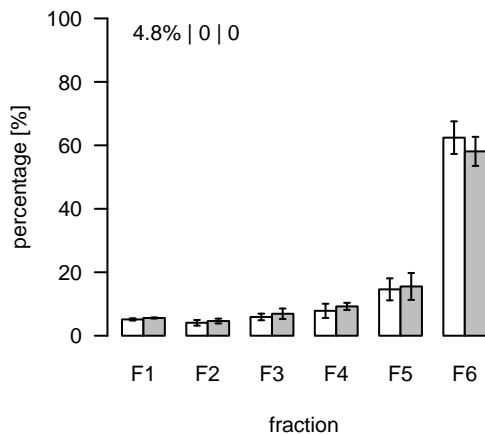

**L538 (m/z=783.537361; rt=4.81341)**  
T/S Cluster: L-4.8-10

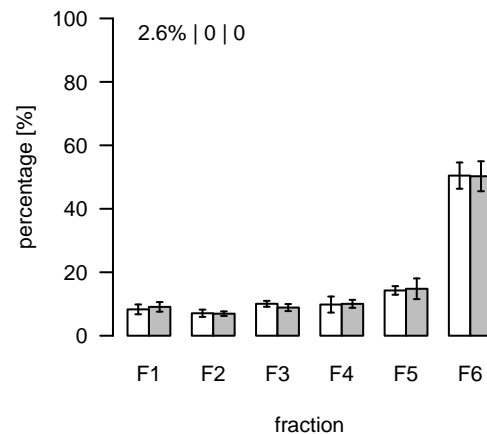

**L523 (m/z=390.767452; rt=4.80774)**  
T/S Cluster: L-4.8-10

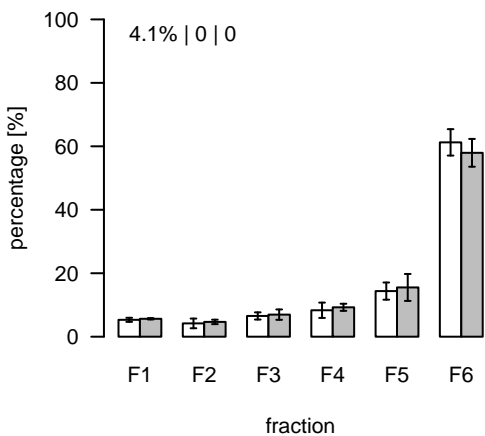

**L534 (m/z=745.493126; rt=4.81139)**  
T/S Cluster: L-4.8-10

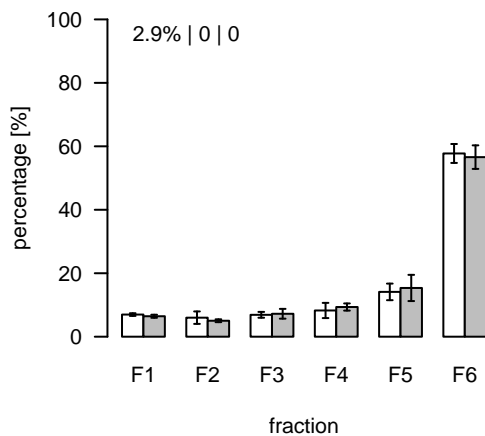

**L548 (m/z=778.566698; rt=4.83544)**  
T/S Cluster: L-4.8-10

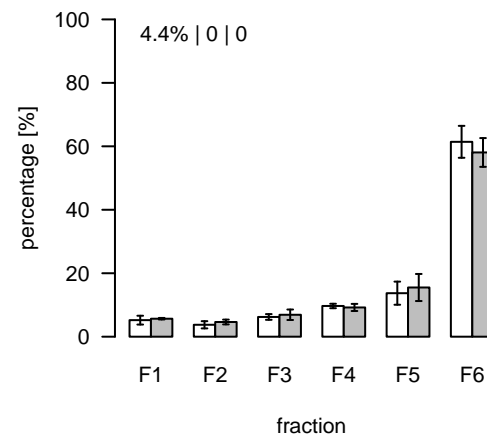

**L529 (m/z=583.423061; rt=4.80981)**  
T/S Cluster: L-4.8-10

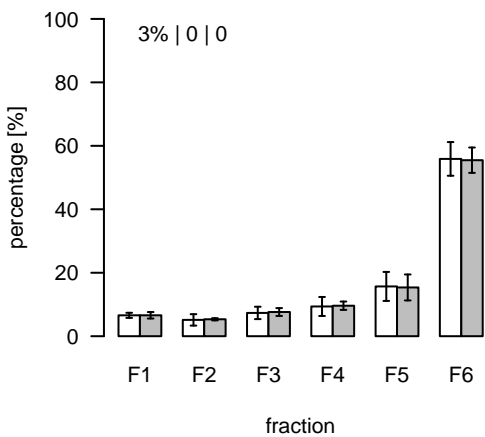

**L520 (m/z=260.180026; rt=4.80647)**  
T/S Cluster: L-4.8-10

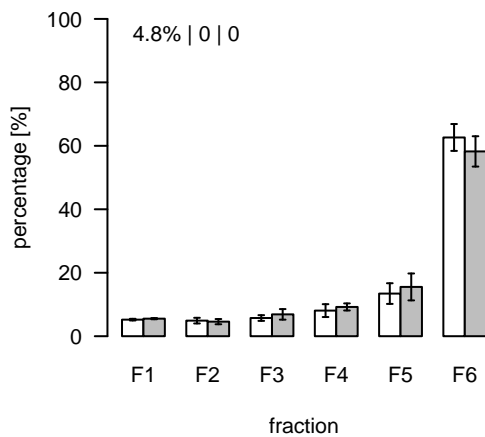

**L557 (m/z=808.55929; rt=4.84721)**  
T/S Cluster: L-4.8-10

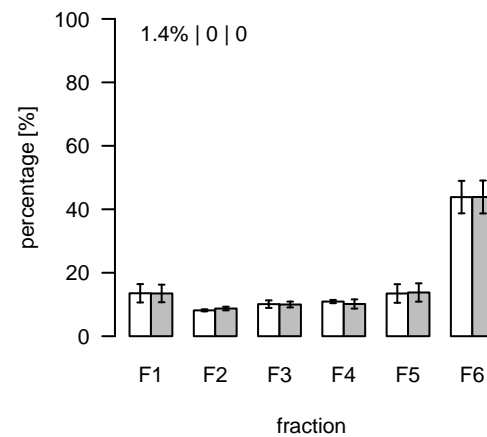

**L544 (m/z=808.543061; rt=4.83352)**  
T/S Cluster: L-4.8-10

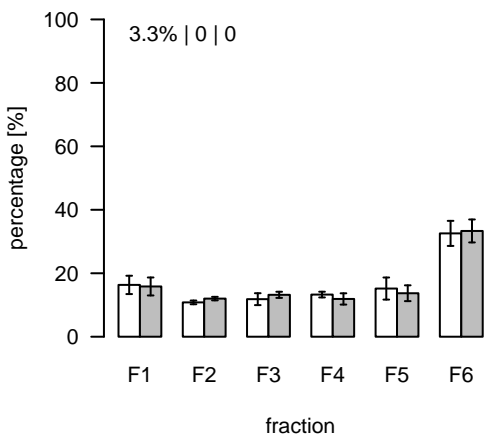

**L527 (m/z=781.589217; rt=4.80932)**  
T/S Cluster: L-4.8-10

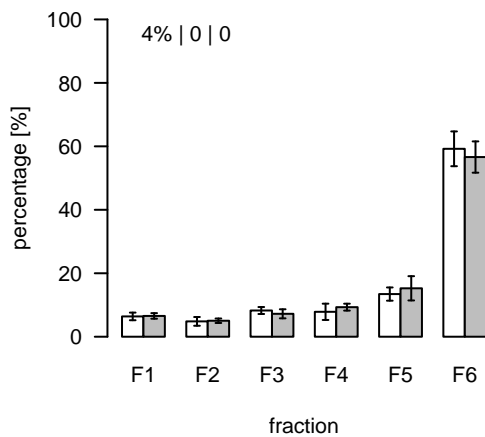

**L521 (m/z=824.559558; rt=4.80697)**  
T/S Cluster: L-4.8-10

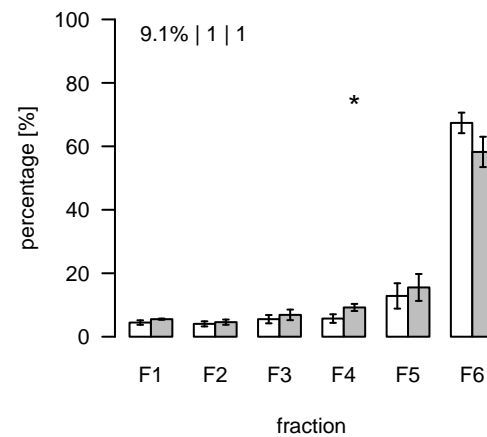

**L550 (m/z=389.756667; rt=4.83557)**  
T/S Cluster: L-4.8-10

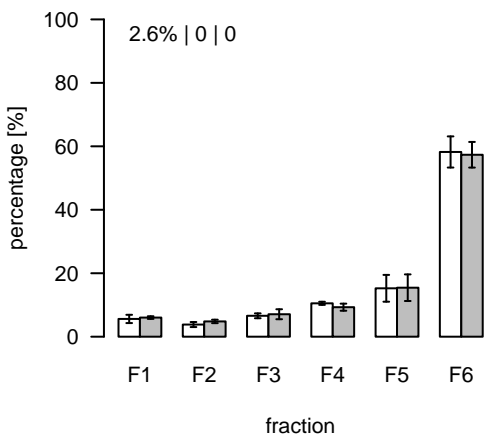

**L554 (m/z=389.762262; rt=4.83566)**  
T/S Cluster: L-4.8-10

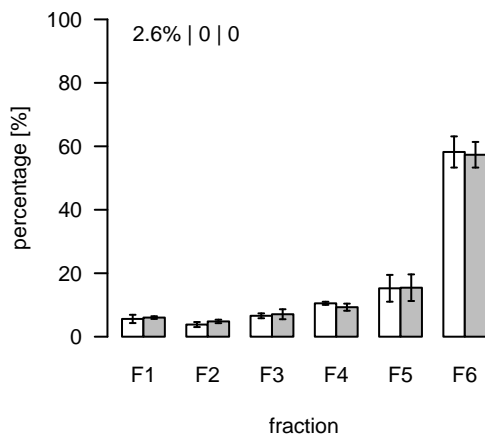

**L530 (m/z=391.269306; rt=4.8107)**  
T/S Cluster: L-4.8-10

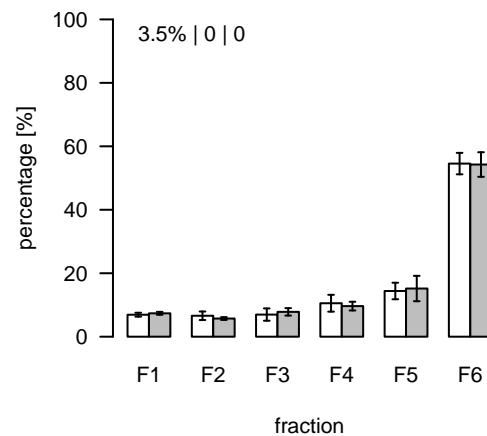

**L535 (m/z=746.485037; rt=4.8115)**  
T/S Cluster: L-4.8-10

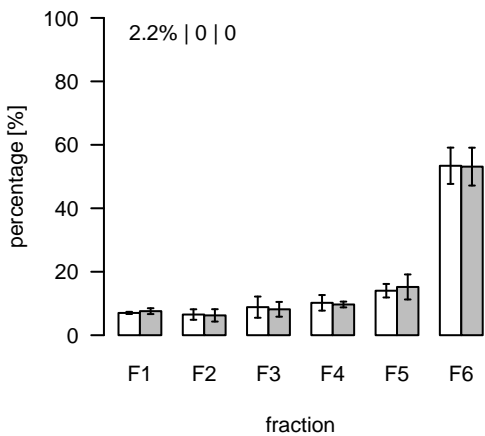

**L536 (m/z=746.503308; rt=4.81194)**  
T/S Cluster: L-4.8-10

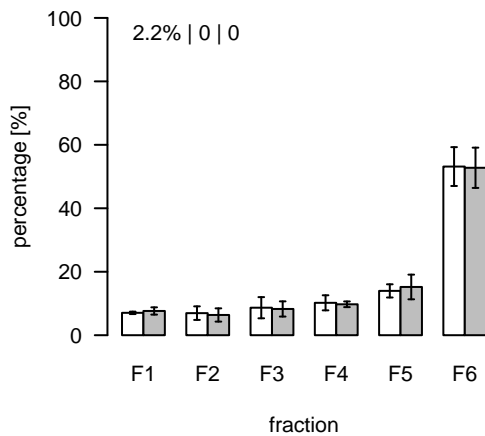

**L540 (m/z=391.277009; rt=4.81662)**  
T/S Cluster: L-4.8-10

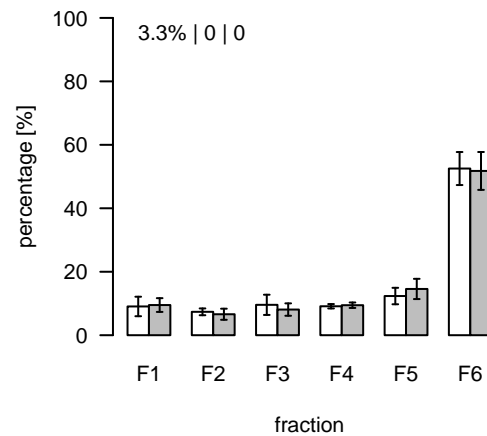

**L537 (m/z=584.442856; rt=4.81312)**  
T/S Cluster: L-4.8-10

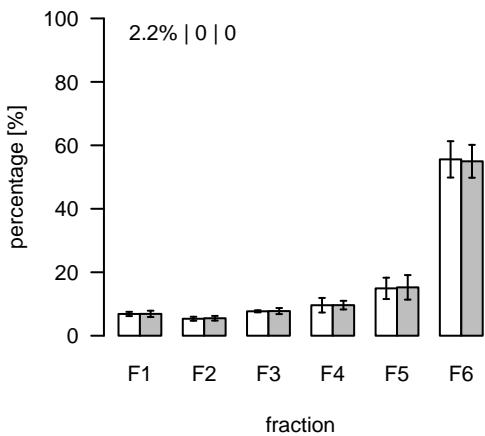

**L519 (m/z=826.566902; rt=4.80063)**  
T/S Cluster: L-4.8-10

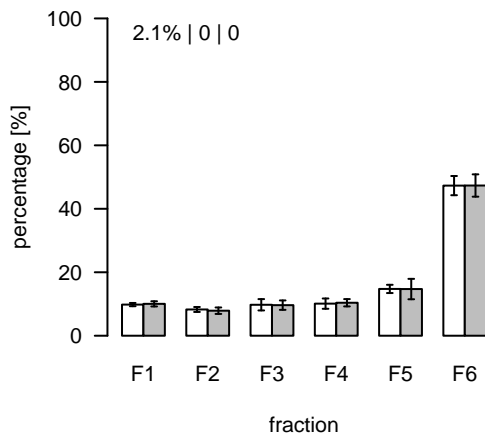

**L539 (m/z=784.50747; rt=4.81367)**  
T/S Cluster: L-4.8-11

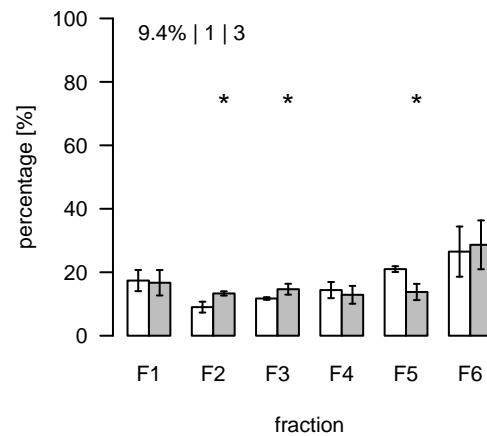

**L556 (m/z=799.442777; rt=4.84088)**  
T/S Cluster: L-4.8-11

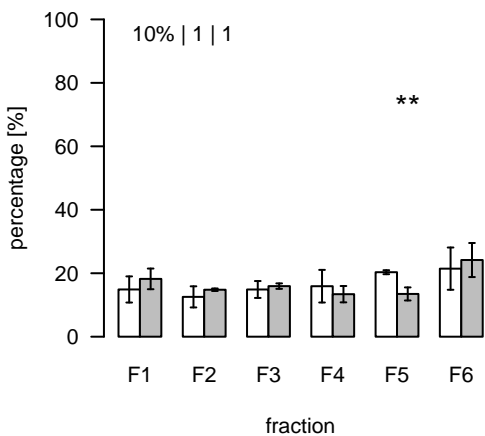

**L542 (m/z=678.473587; rt=4.82447)**  
T/S Cluster: L-4.8-12

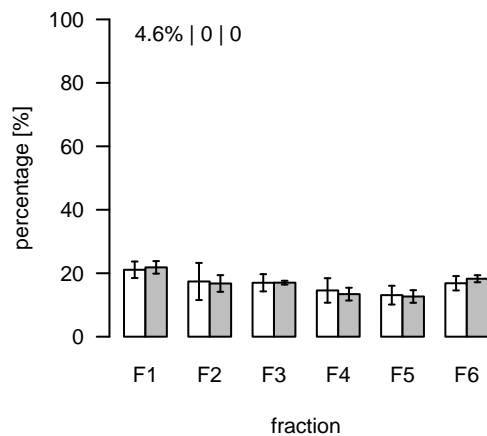

**L541 (m/z=678.455444; rt=4.82428)**  
T/S Cluster: L-4.8-12

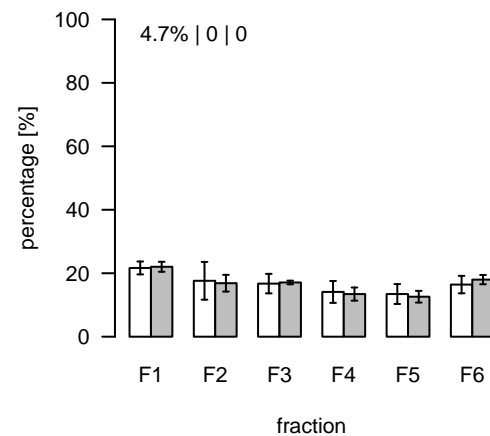

**L543 (m/z=802.473002; rt=4.82827)**  
T/S Cluster: L-4.8-13

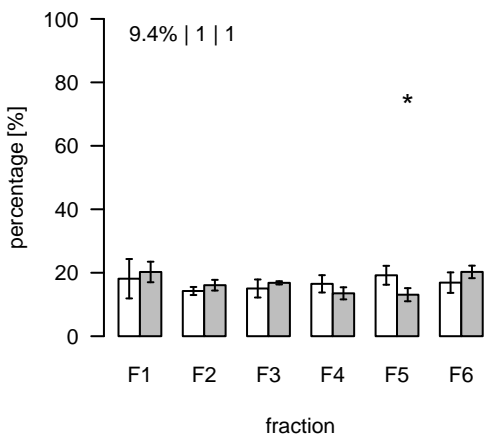

**L558 (m/z=806.539357; rt=4.85137)**  
T/S Cluster: L-4.9-1

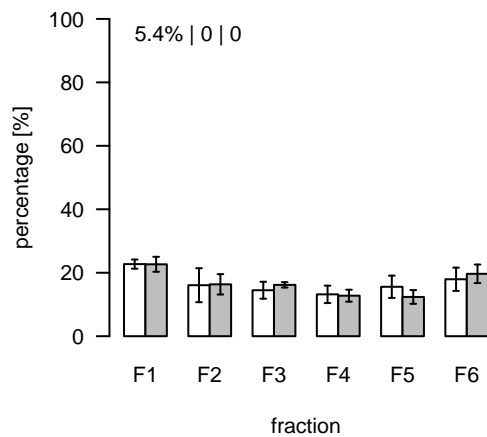

**L559 (m/z=806.556985; rt=4.85308)**  
T/S Cluster: L-4.9-1

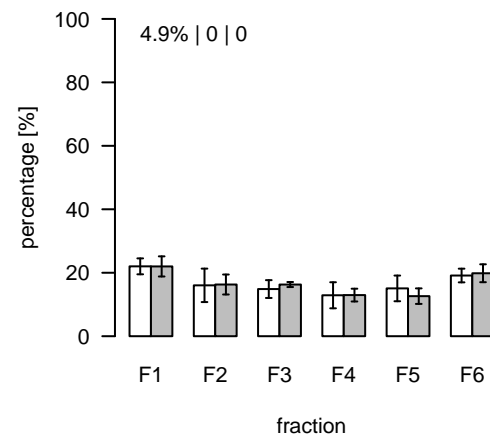

**L620 (m/z=986.612313; rt=4.91768)**  
T/S Cluster: L-4.9-2

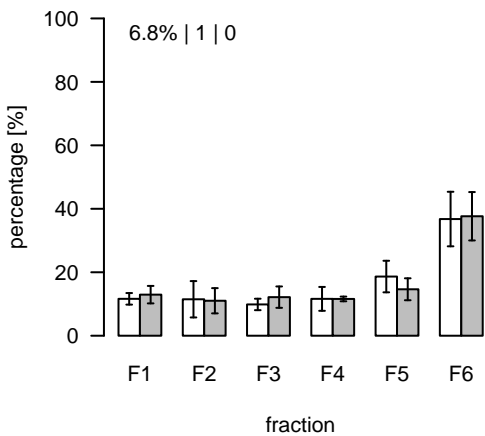

**L621 (m/z=986.585901; rt=4.91791)**  
T/S Cluster: L-4.9-2

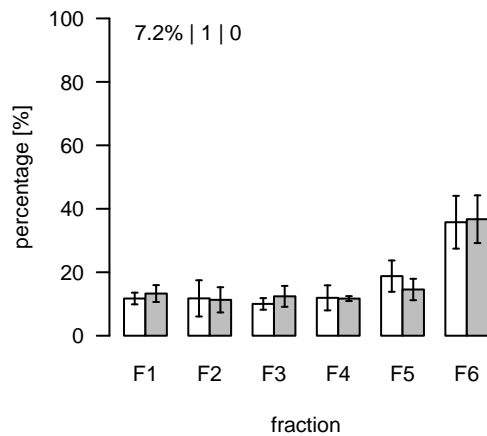

**L562 (m/z=796.526243; rt=4.86442)**  
T/S Cluster: L-4.9-2

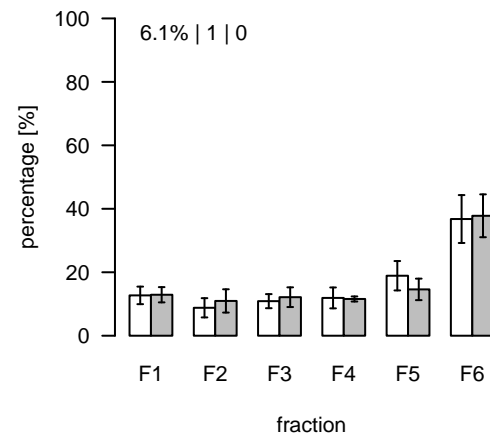

**L563 (m/z=796.532857; rt=4.86454)**  
T/S Cluster: L-4.9-2

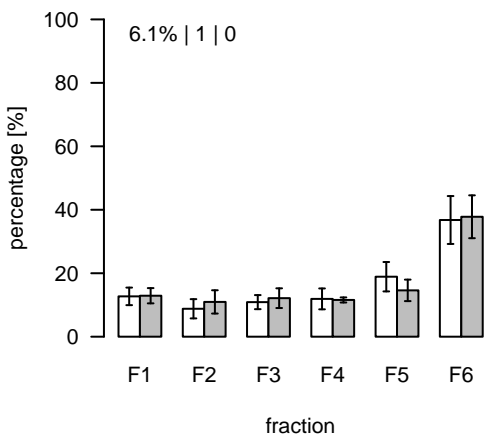

**L560 (m/z=796.512432; rt=4.86379)**  
T/S Cluster: L-4.9-2

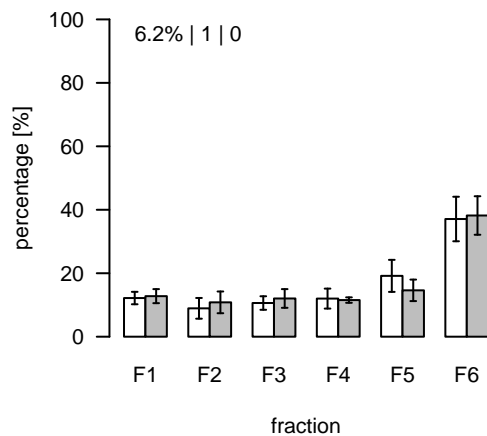

**L619 (m/z=987.614556; rt=4.9171)**  
T/S Cluster: L-4.9-2

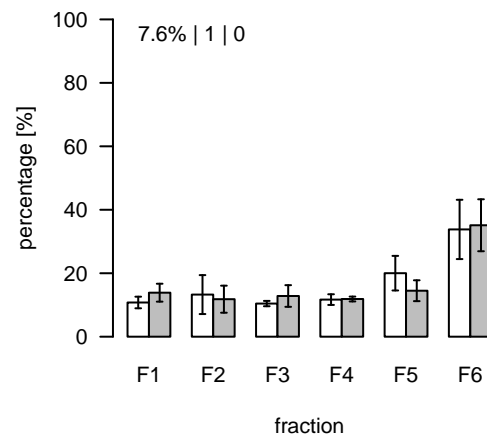

**L561 (m/z=796.486616; rt=4.864)**  
T/S Cluster: L-4.9-2

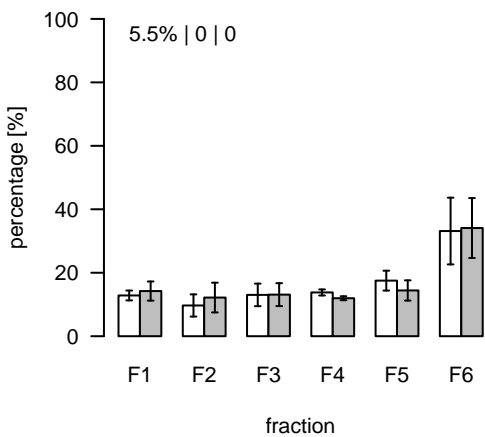

**L564 (m/z=742.496038; rt=4.87003)**  
T/S Cluster: L-4.9-3

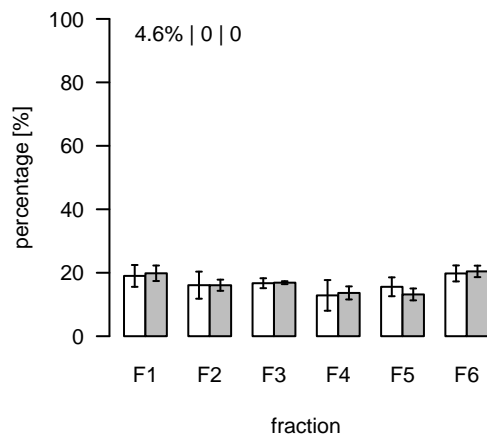

**L565 (m/z=742.513855; rt=4.87059)**  
T/S Cluster: L-4.9-3

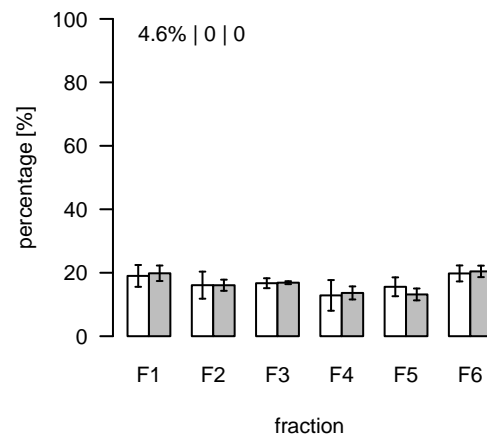

**L567 (m/z=743.510116; rt=4.87535)**  
T/S Cluster: L-4.9-3

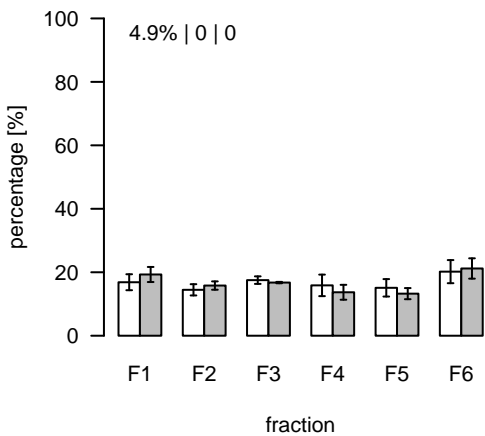

**L581 (m/z=789.610535; rt=4.89698)**  
T/S Cluster: L-4.9-4

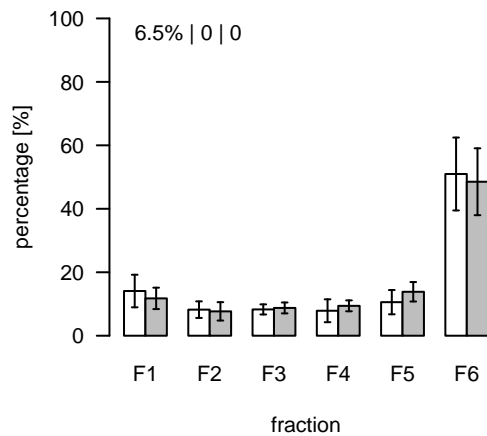

**L586 (m/z=788.613377; rt=4.89771)**  
T/S Cluster: L-4.9-4

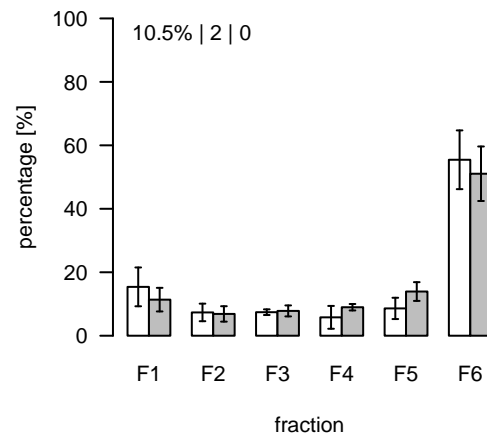

**L566 (m/z=832.638918; rt=4.87486)**  
T/S Cluster: L-4.9-4

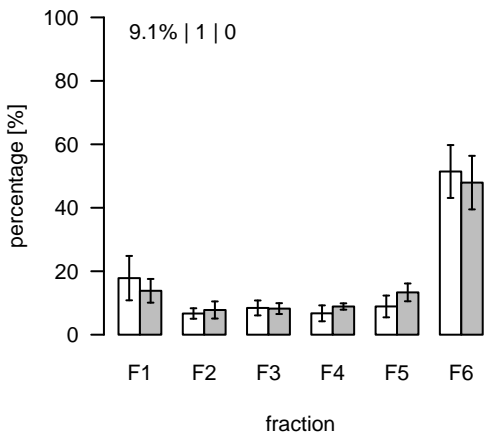

**L568 (m/z=802.535644; rt=4.88137)**  
T/S Cluster: L-4.9-5

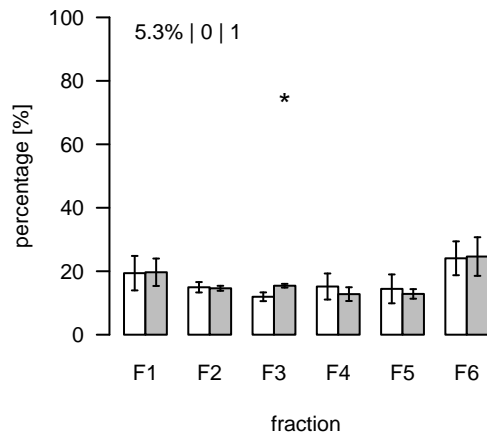

**L569 (m/z=789.554005; rt=4.88913)**  
T/S Cluster: L-4.9-6

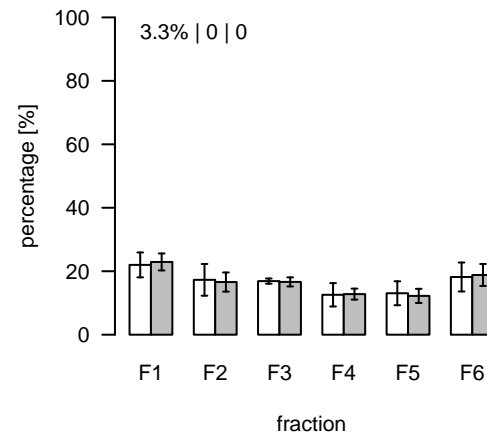

**L570 (m/z=394.274766; rt=4.88964)**  
T/S Cluster: L-4.9-7

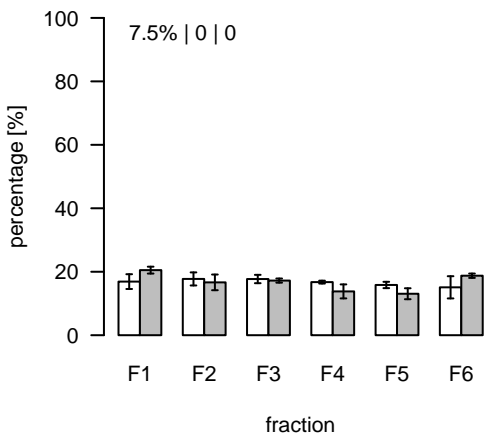

**L571 (m/z=788.558731; rt=4.89256)**  
T/S Cluster: L-4.9-8

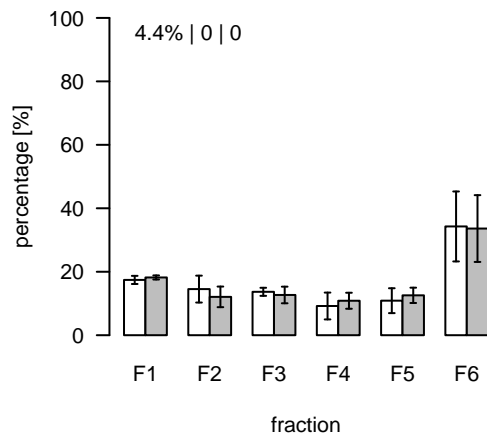

**L583 (m/z=970.615341; rt=4.89707)**  
T/S Cluster: L-4.9-9

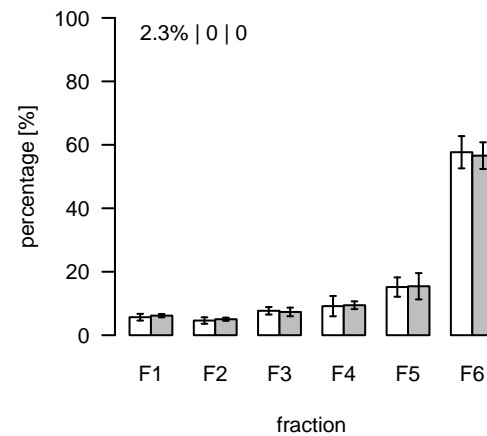

**L578 (m/z=971.619572; rt=4.89653)**  
T/S Cluster: L-4.9-9

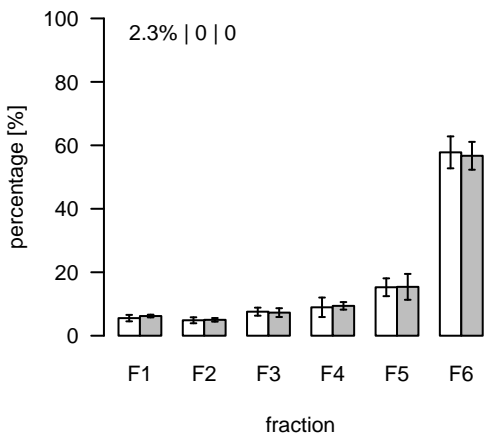

**L580 (m/z=971.586649; rt=4.89673)**  
T/S Cluster: L-4.9-9

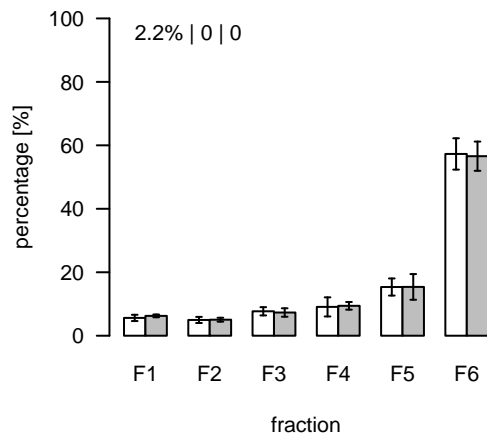

**L585 (m/z=970.561489; rt=4.8976)**  
T/S Cluster: L-4.9-9

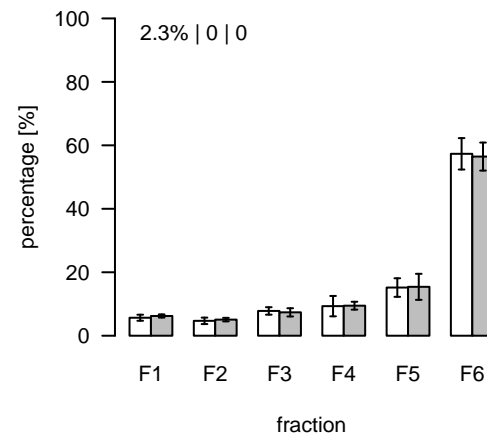

**L613 (m/z=968.602064; rt=4.91105)**  
T/S Cluster: L-4.9-9

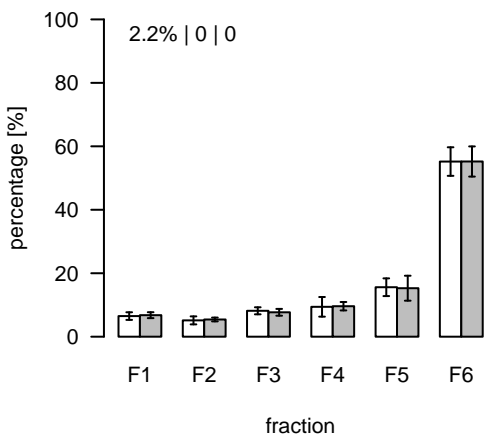

**L576 (m/z=972.623201; rt=4.89637)**  
T/S Cluster: L-4.9-9

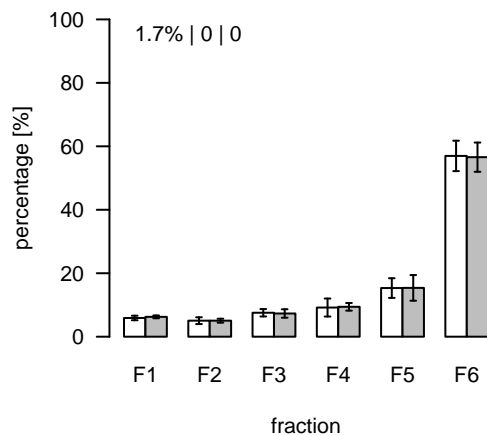

**L615 (m/z=968.557067; rt=4.91145)**  
T/S Cluster: L-4.9-9

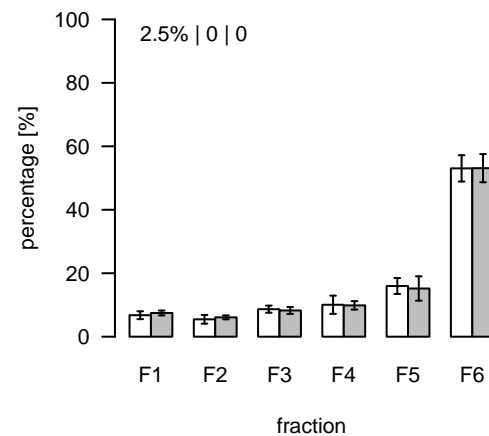

**L577 (m/z=972.594009; rt=4.89651)**  
T/S Cluster: L-4.9-9

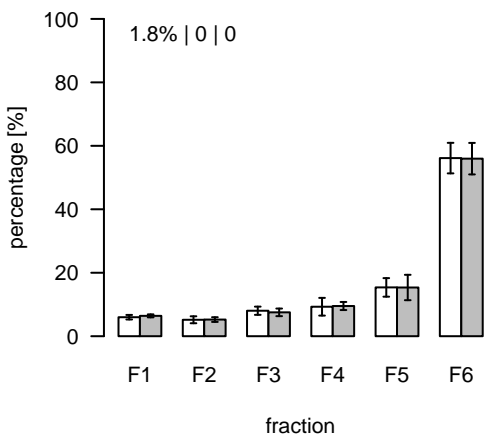

**L612 (m/z=969.604967; rt=4.91092)**  
T/S Cluster: L-4.9-9

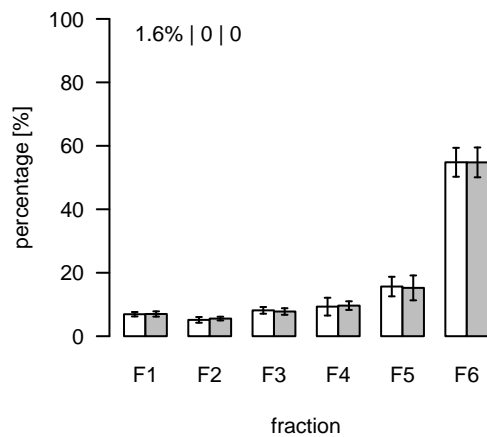

**L579 (m/z=485.313088; rt=4.8966)**  
T/S Cluster: L-4.9-9

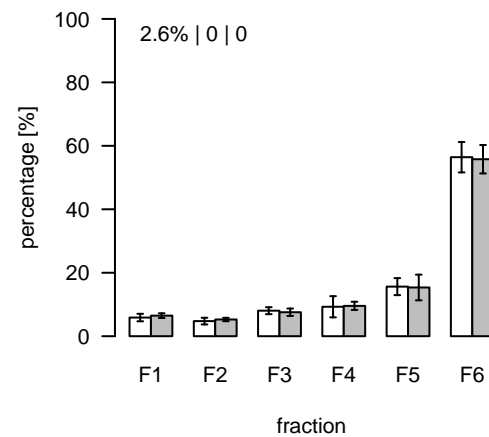

**L582 (m/z=485.304028; rt=4.89699)**  
T/S Cluster: L-4.9-9

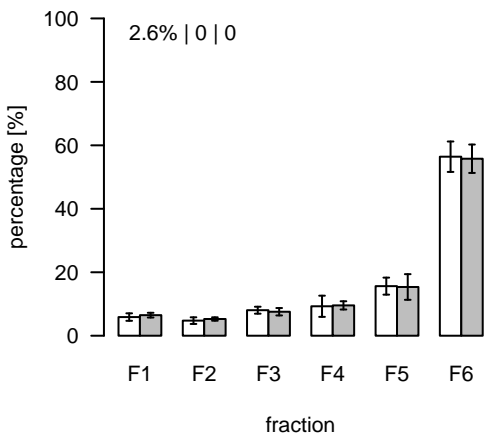

**L614 (m/z=969.558773; rt=4.91106)**  
T/S Cluster: L-4.9-9

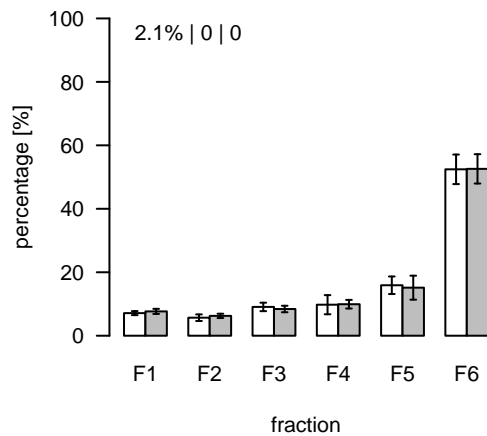

**L589 (m/z=973.619876; rt=4.89907)**  
T/S Cluster: L-4.9-9

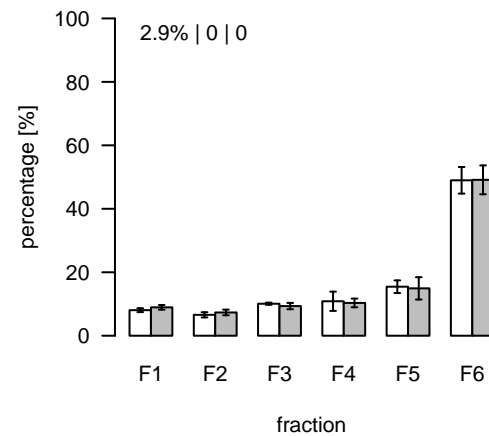



**L604 (m/z=973.58013; rt=4.90579)**  
T/S Cluster: L-4.9-9

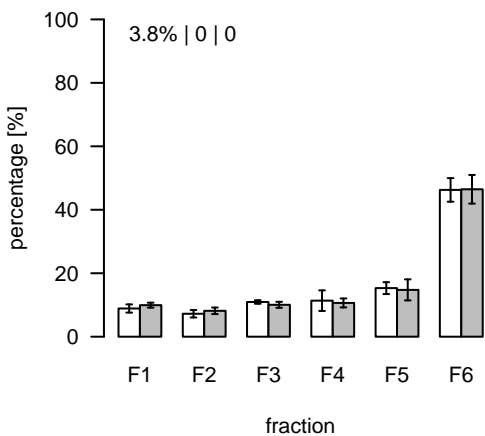

**L575 (m/z=485.809248; rt=4.89618)**  
T/S Cluster: L-4.9-9

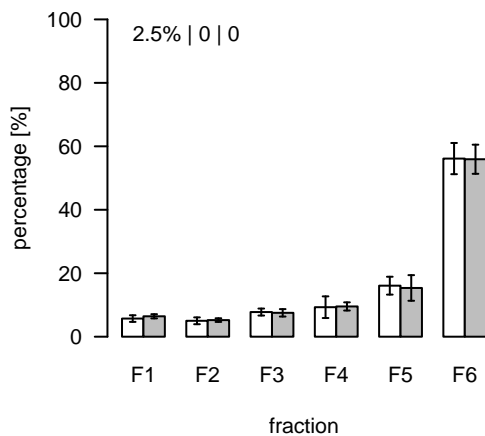

**L574 (m/z=485.818764; rt=4.89606)**  
T/S Cluster: L-4.9-9

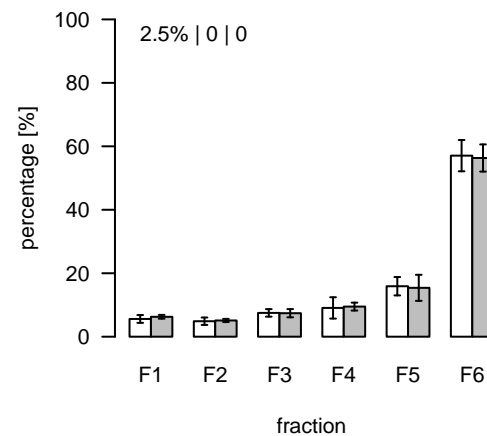

**L630 (m/z=485.306997; rt=4.94296)**  
T/S Cluster: L-4.9-9

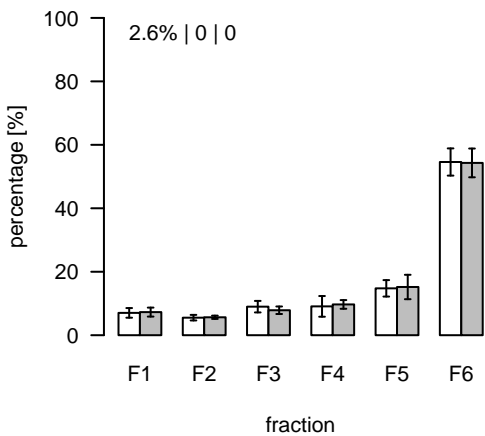

**L607 (m/z=974.571778; rt=4.90822)**  
T/S Cluster: L-4.9-9

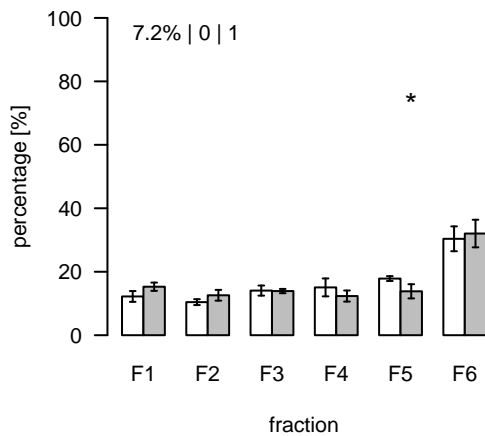

**L573 (m/z=611.47042; rt=4.89589)**  
T/S Cluster: L-4.9-9

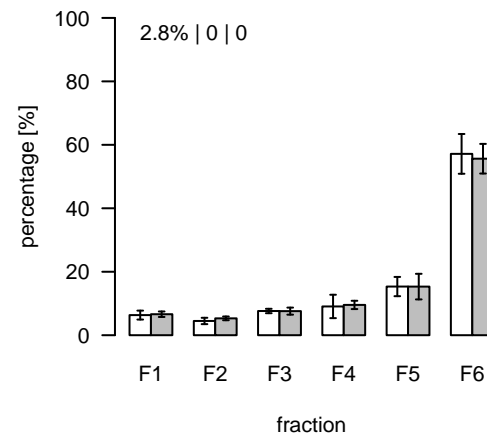

**L572 (m/z=611.459144; rt=4.89571)**  
T/S Cluster: L-4.9-9

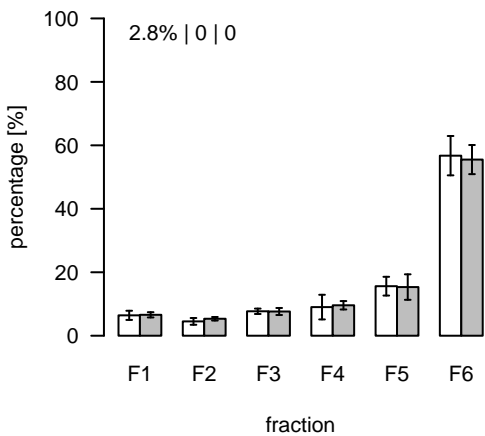

**L610 (m/z=484.305093; rt=4.91022)**  
T/S Cluster: L-4.9-9

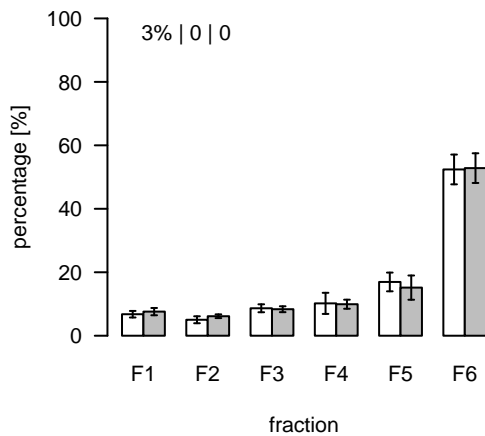

**L611 (m/z=484.299709; rt=4.91038)**  
T/S Cluster: L-4.9-9

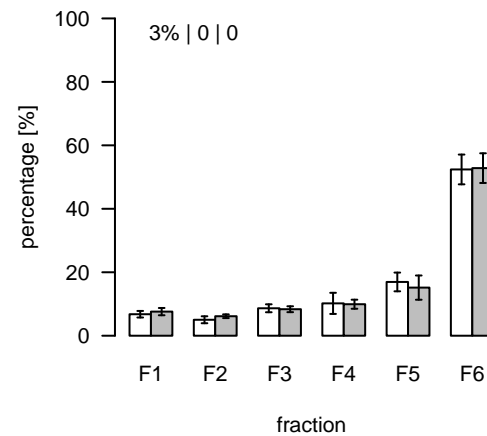

**L598 (m/z=974.61416; rt=4.90165)**  
T/S Cluster: L-4.9-9

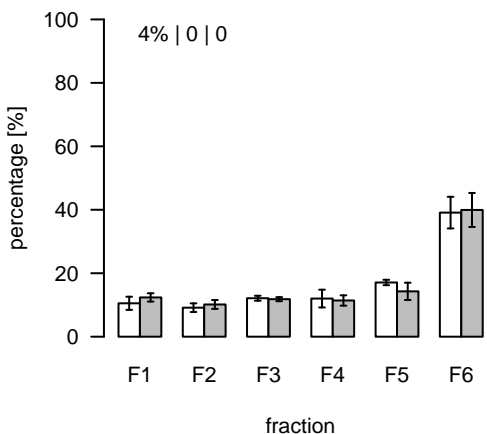

**L593 (m/z=794.537664; rt=4.90028)**  
T/S Cluster: L-4.9-10

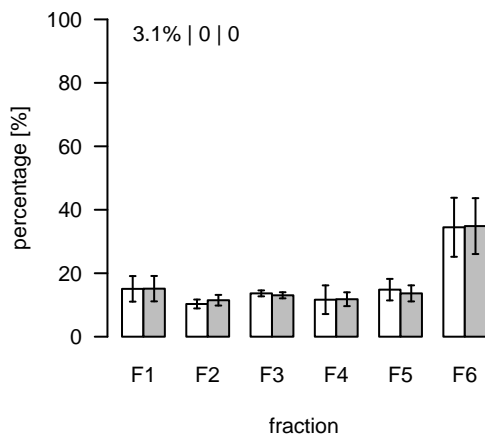

**L595 (m/z=794.508886; rt=4.90098)**  
T/S Cluster: L-4.9-10

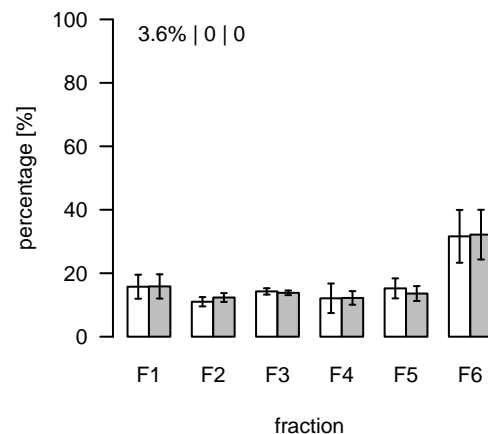

**L584 (m/z=795.54141; rt=4.8972)**  
T/S Cluster: L-4.9-10

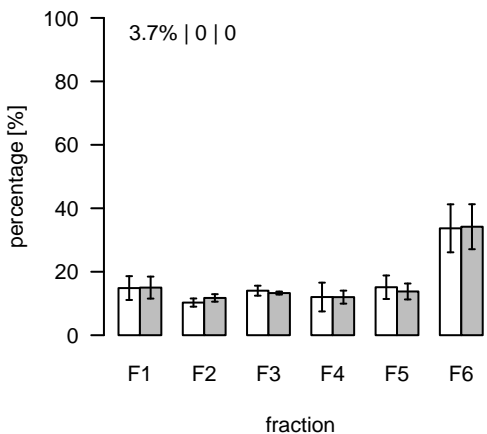

**L592 (m/z=795.543285; rt=4.90003)**  
T/S Cluster: L-4.9-10

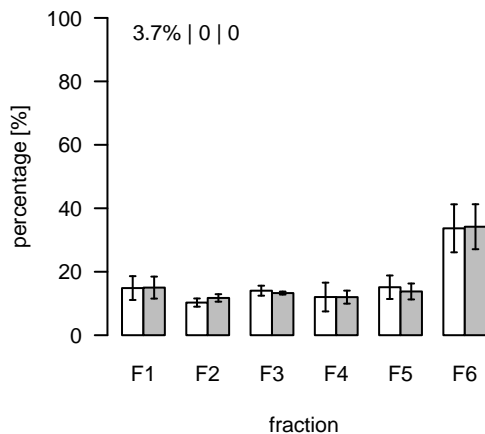

**L594 (m/z=795.518685; rt=4.9005)**  
T/S Cluster: L-4.9-10

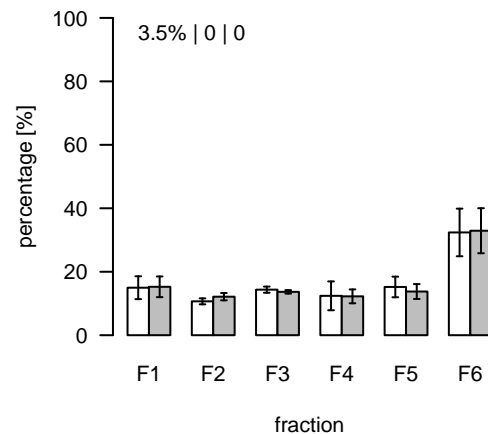

**L603 (m/z=792.525319; rt=4.90538)**  
T/S Cluster: L-4.9-10

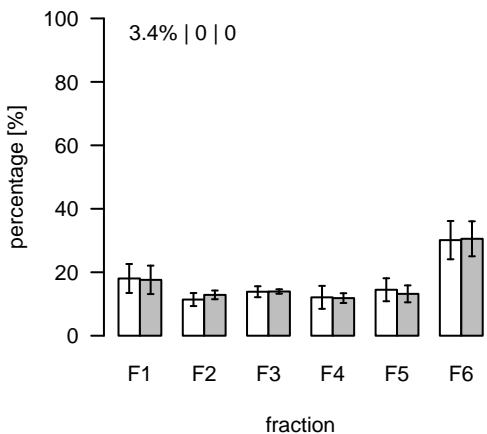

**L609 (m/z=792.519626; rt=4.9098)**  
T/S Cluster: L-4.9-10

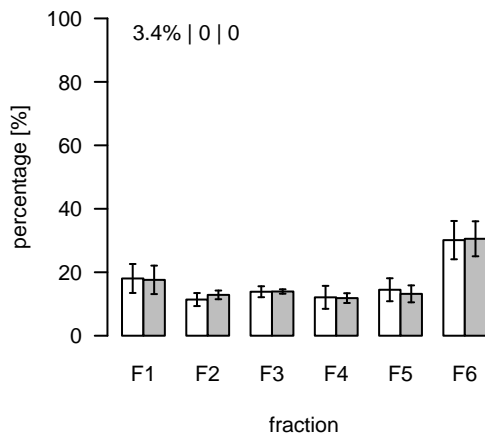

**L588 (m/z=794.492845; rt=4.89898)**  
T/S Cluster: L-4.9-10

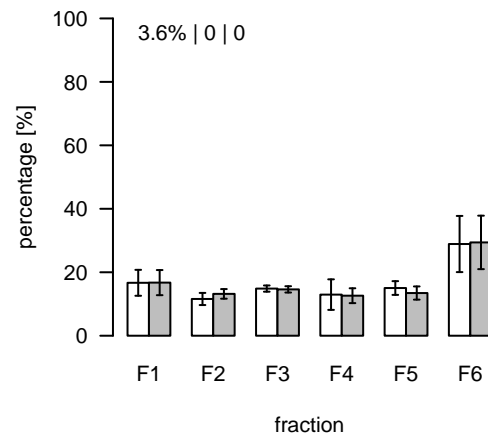

**L617 (m/z=792.547432; rt=4.91539)**  
T/S Cluster: L-4.9-10

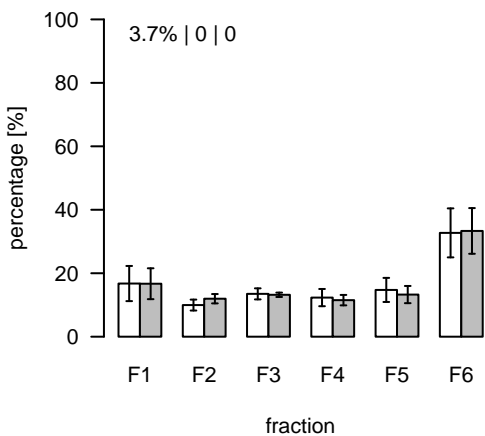

**L608 (m/z=793.525527; rt=4.9093)**  
T/S Cluster: L-4.9-10

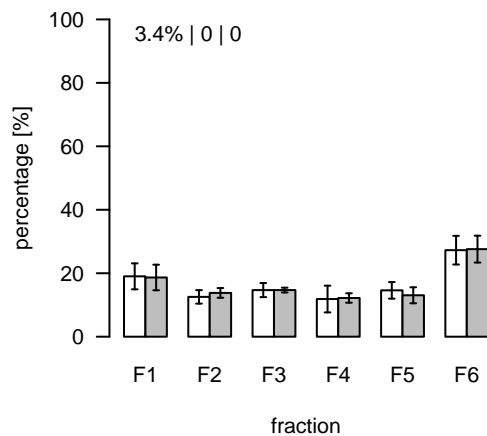

**L587 (m/z=397.269964; rt=4.89811)**  
T/S Cluster: L-4.9-10

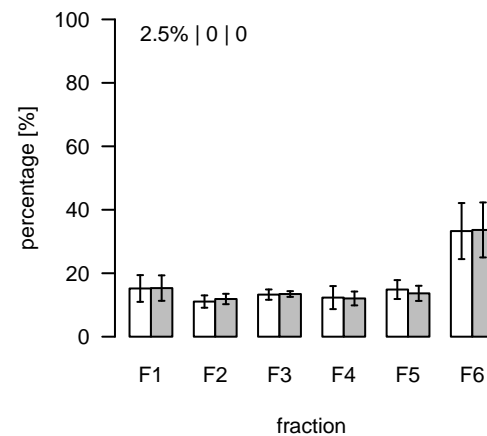

**L591 (m/z=397.268576; rt=4.89983)**  
T/S Cluster: L-4.9-10

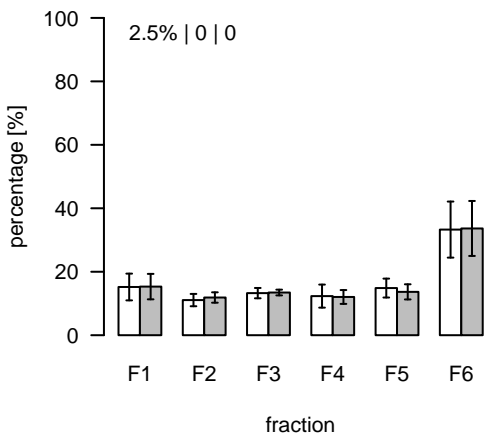

**L590 (m/z=397.274241; rt=4.89973)**  
T/S Cluster: L-4.9-10

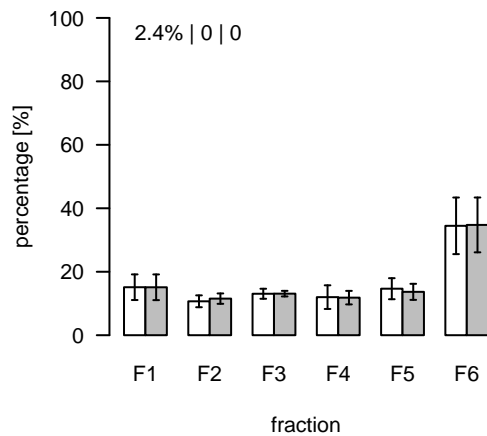

**L596 (m/z=776.51135; rt=4.90157)**  
T/S Cluster: L-4.9-11

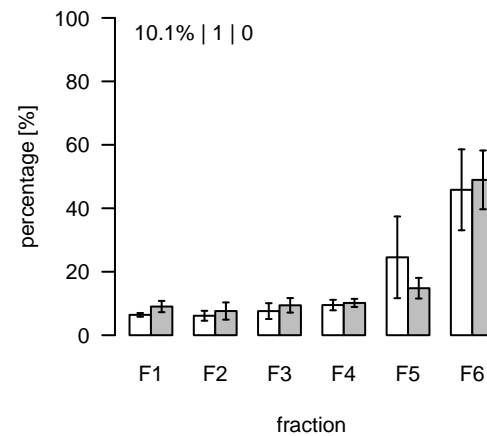

**L601 (m/z=776.485274; rt=4.90422)**  
T/S Cluster: L-4.9-11

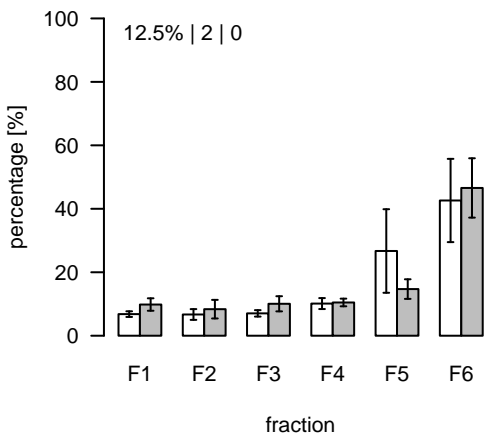

**L616 (m/z=774.49399; rt=4.91337)**  
T/S Cluster: L-4.9-11

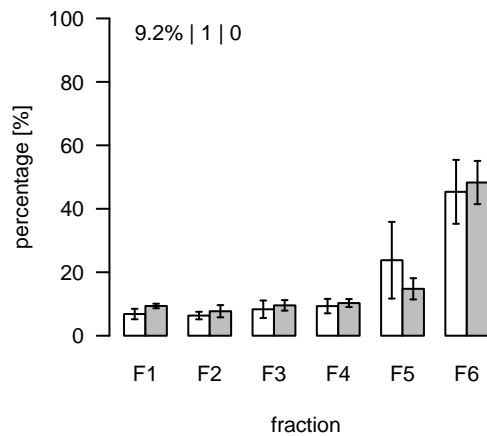

**L622 (m/z=774.490816; rt=4.9215)**  
T/S Cluster: L-4.9-11

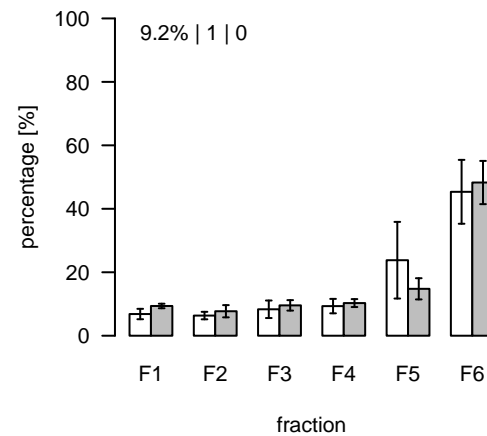

**L623 (m/z=774.510302; rt=4.92332)**  
T/S Cluster: L-4.9-11

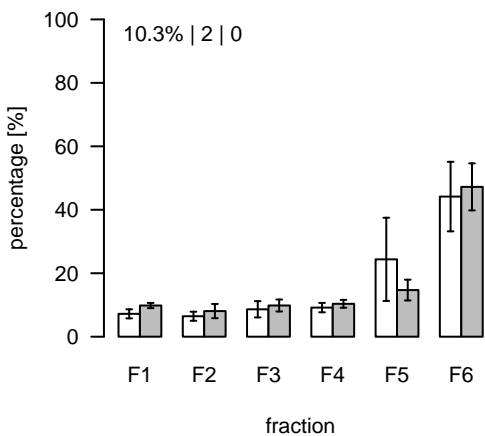

**L599 (m/z=975.570645; rt=4.90281)**  
T/S Cluster: L-4.9-12

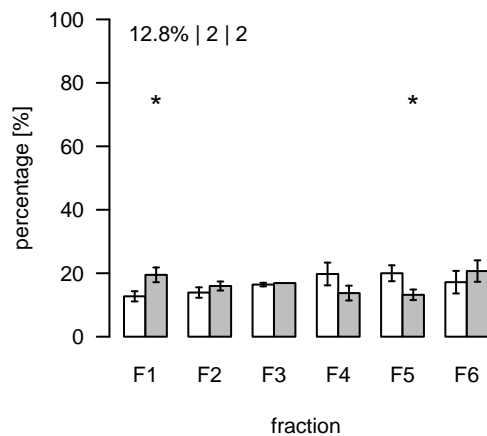

**L597 (m/z=976.57399; rt=4.90165)**  
T/S Cluster: L-4.9-12

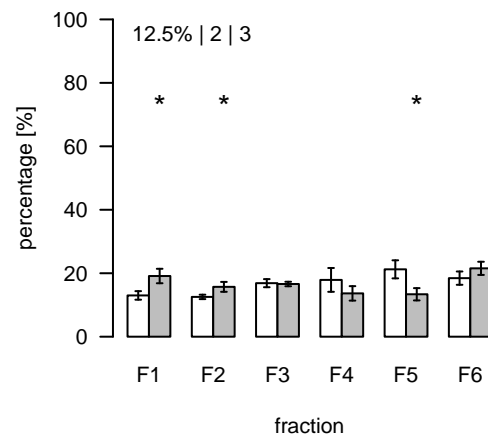

**L624 (m/z=848.523794; rt=4.92577)**  
T/S Cluster: L-4.9-13

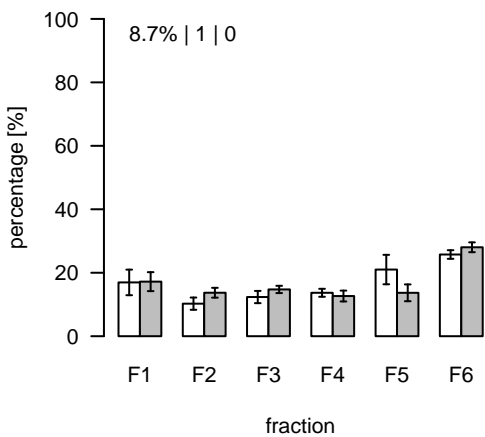

**L600 (m/z=850.537216; rt=4.90343)**  
T/S Cluster: L-4.9-13

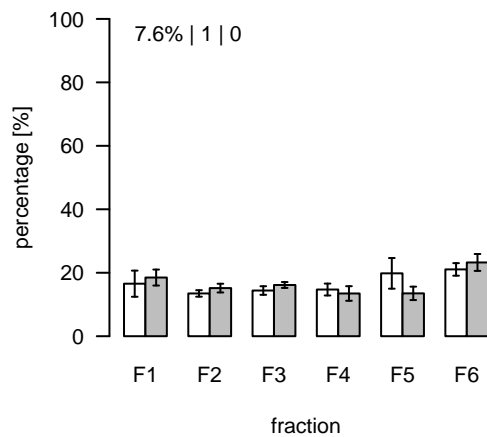

**L602 (m/z=844.531717; rt=4.90518)**  
T/S Cluster: L-4.9-14

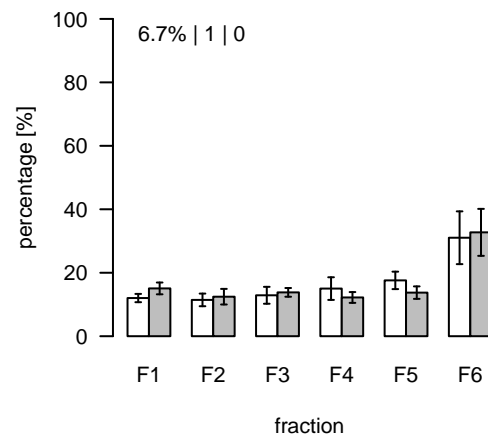

**L605 (m/z=843.527252; rt=4.90645)**  
T/S Cluster: L-4.9-15

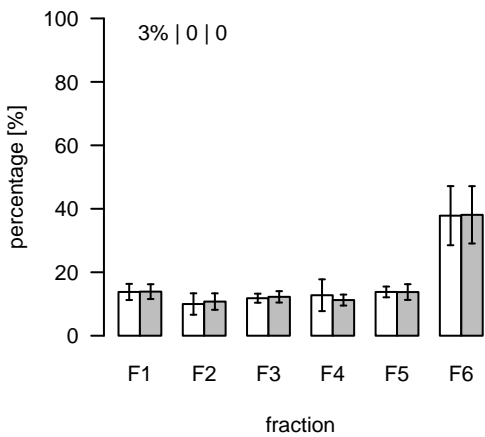

**L606 (m/z=832.526805; rt=4.90808)**  
T/S Cluster: L-4.9-16

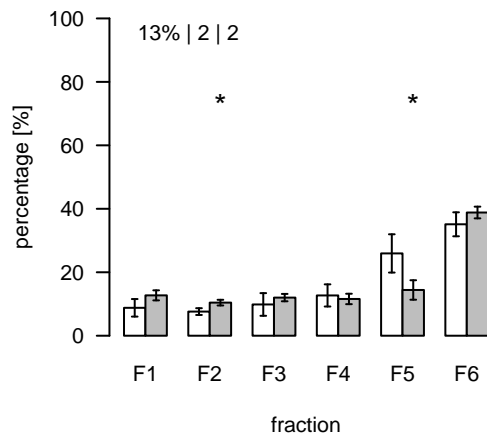

**L618 (m/z=832.526833; rt=4.91642)**  
T/S Cluster: L-4.9-16

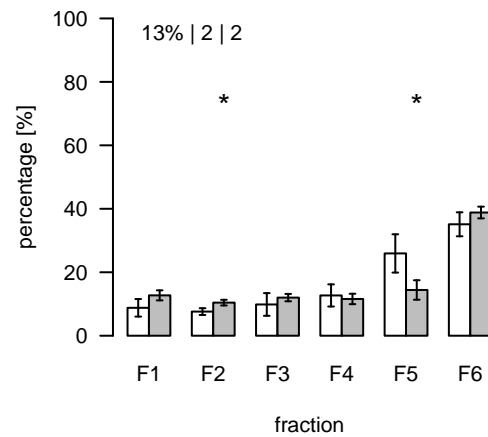

**L631 (m/z=832.526925; rt=4.94563)**  
T/S Cluster: L-4.9-16

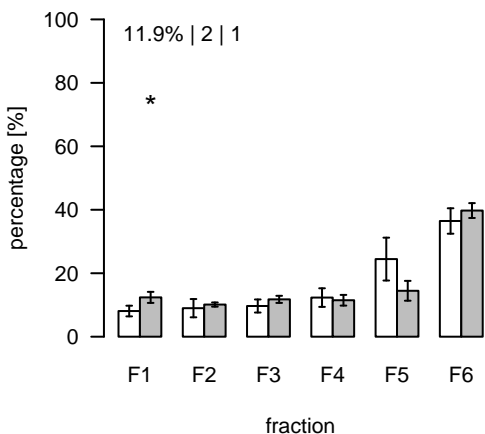

**L635 (m/z=849.527124; rt=4.94971)**  
T/S Cluster: L-4.9-17

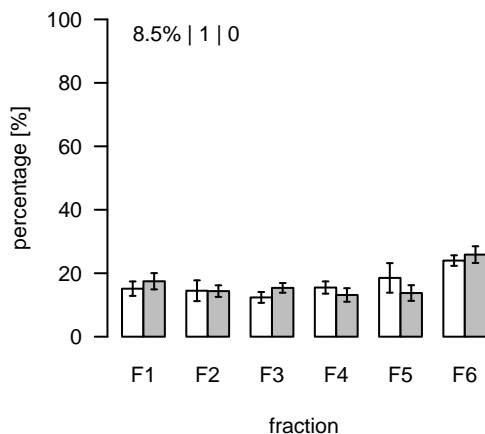

**L625 (m/z=849.527236; rt=4.92751)**  
T/S Cluster: L-4.9-17

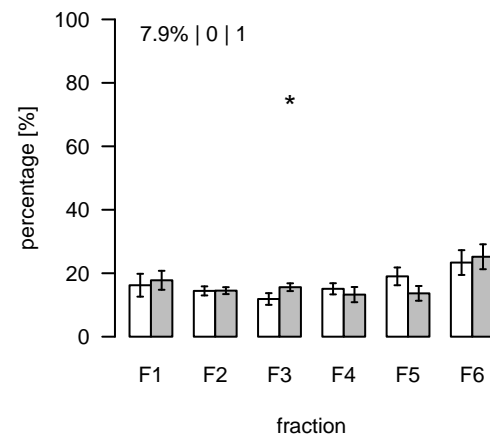

**L626 (m/z=787.538077; rt=4.93435)**  
T/S Cluster: L-4.9-18

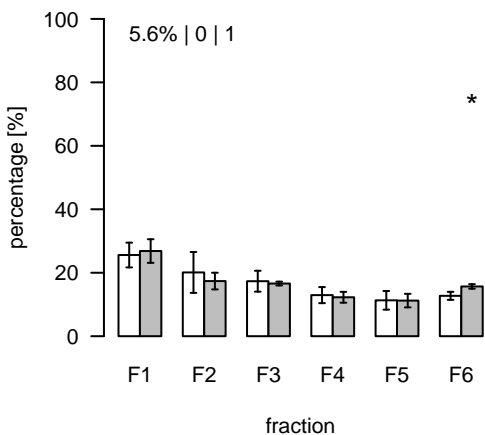

**L627 (m/z=786.53413; rt=4.93455)**  
T/S Cluster: L-4.9-19

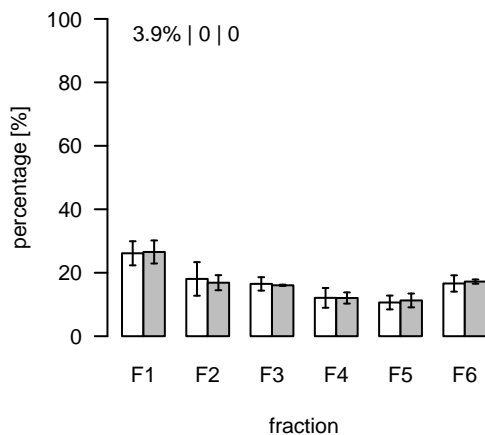

**L628 (m/z=789.555027; rt=4.94026)**  
T/S Cluster: L-4.9-20

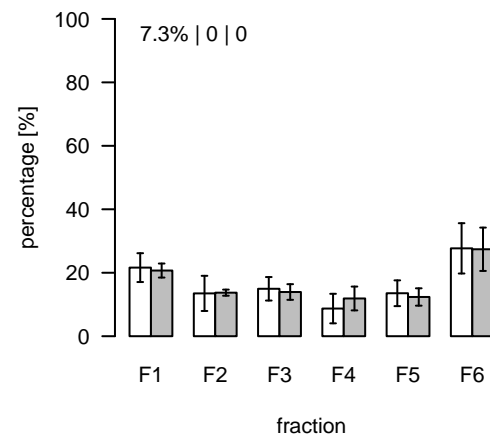

**L629 (m/z=787.496937; rt=4.94149)**  
T/S Cluster: L-4.9-21

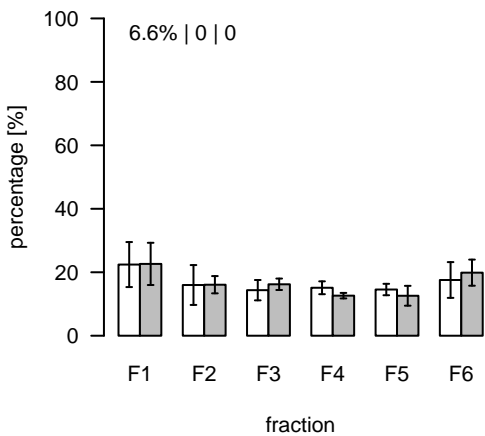

**L632 (m/z=810.555224; rt=4.94575)**  
T/S Cluster: L-4.9-22

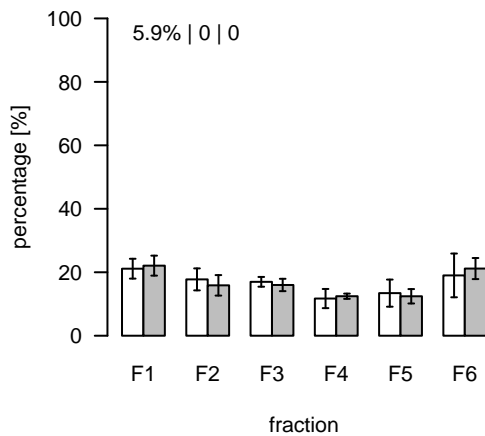

**L633 (m/z=810.530376; rt=4.94704)**  
T/S Cluster: L-4.9-22

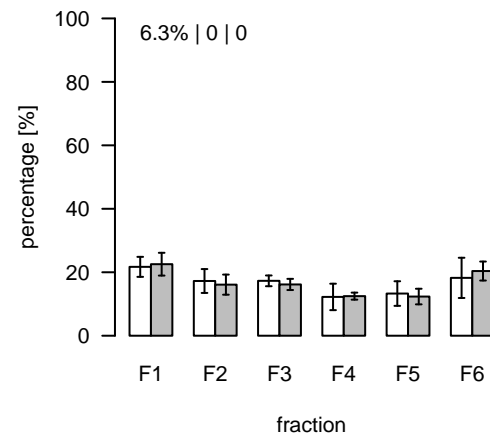

**L634 (m/z=786.486972; rt=4.94739)**  
T/S Cluster: L-4.9-23

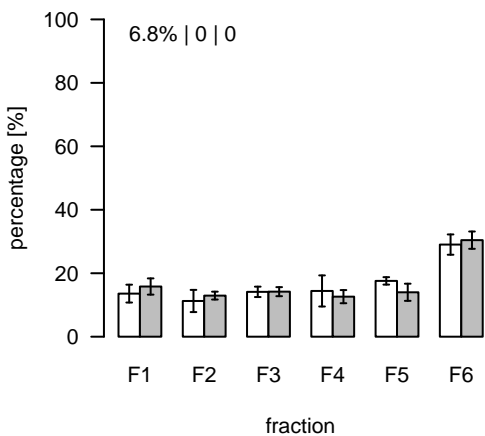

**L648 (m/z=780.529036; rt=4.9531)**  
T/S Cluster: L-5-1

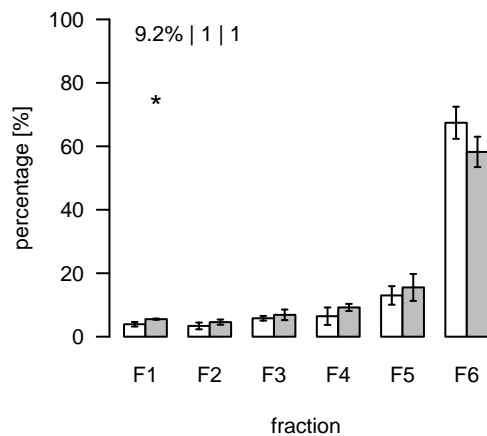

**L649 (m/z=780.528818; rt=4.9531)**  
T/S Cluster: L-5-1

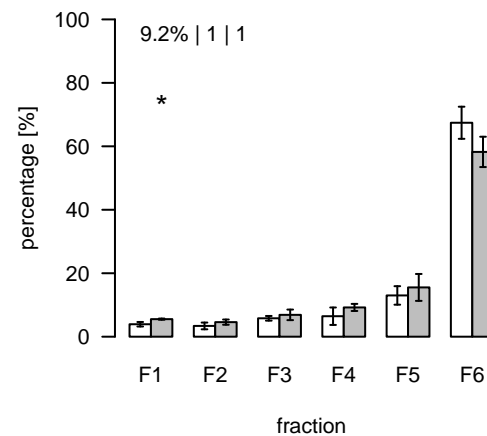

**L644 (m/z=781.532906; rt=4.95285)**  
T/S Cluster: L-5-1

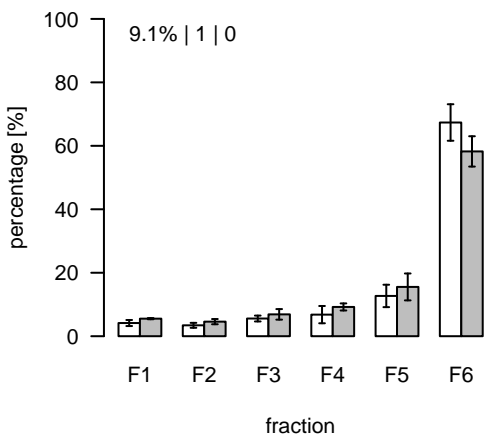

**L645 (m/z=781.532657; rt=4.95286)**  
T/S Cluster: L-5-1

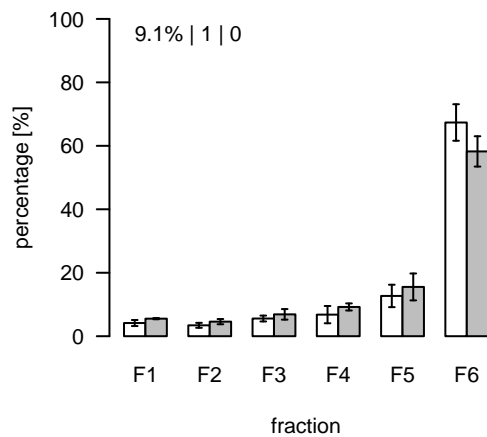

**L662 (m/z=816.506285; rt=5.01503)**  
T/S Cluster: L-5-1

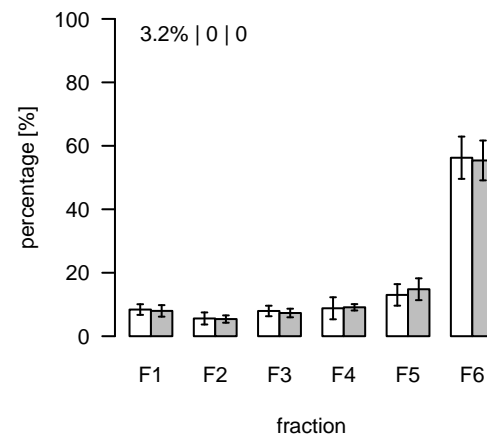

**L667 (m/z=821.461698; rt=5.01641)**  
T/S Cluster: L-5-1

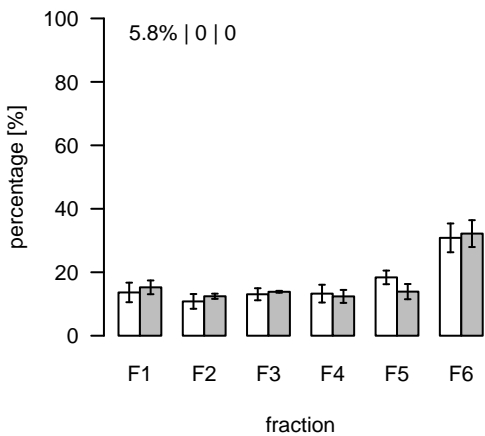

**L651 (m/z=390.265654; rt=4.95322)**  
T/S Cluster: L-5-1

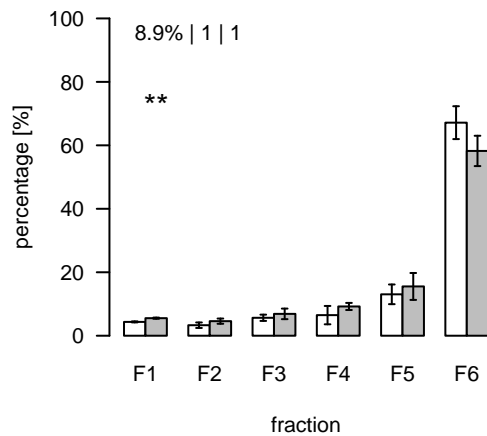

**L660 (m/z=817.509592; rt=5.01432)**  
T/S Cluster: L-5-1

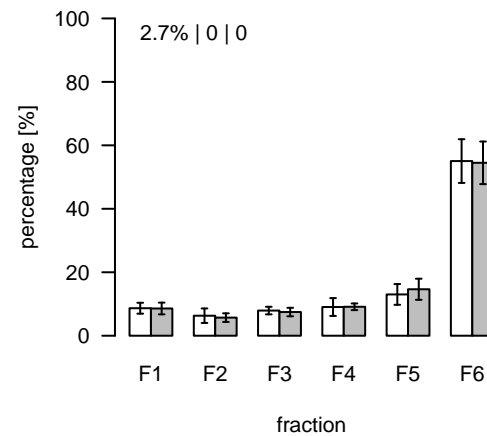

**L665 (m/z=818.50693; rt=5.01555)**  
T/S Cluster: L-5-1

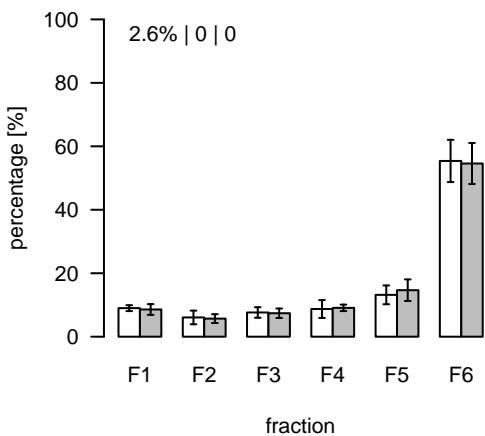

**L640 (m/z=782.535505; rt=4.95227)**  
T/S Cluster: L-5-1

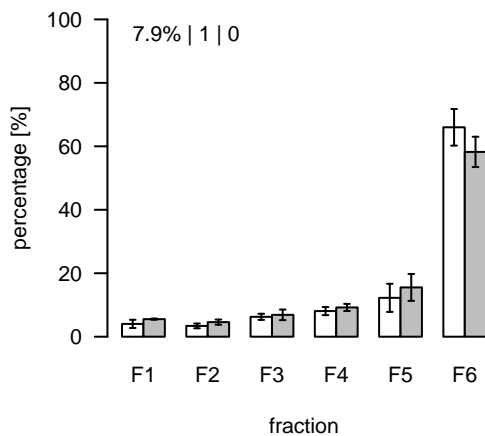

**L652 (m/z=782.504994; rt=4.9534)**  
T/S Cluster: L-5-1

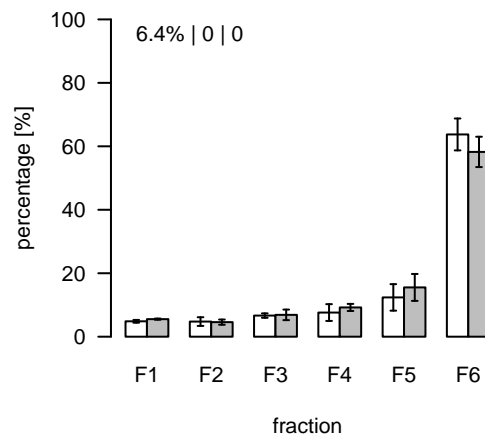

**L670 (m/z=816.548577; rt=5.01763)**  
T/S Cluster: L-5-1

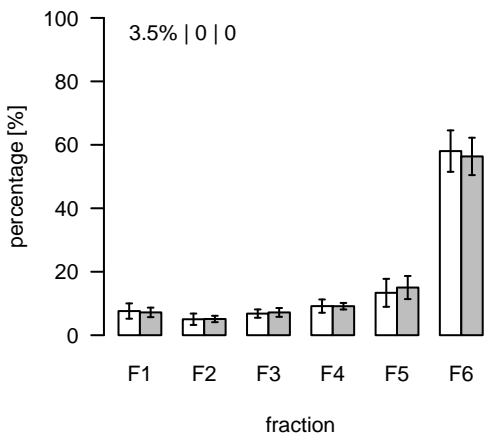

**L666 (m/z=817.5506; rt=5.01627)**  
T/S Cluster: L-5-1

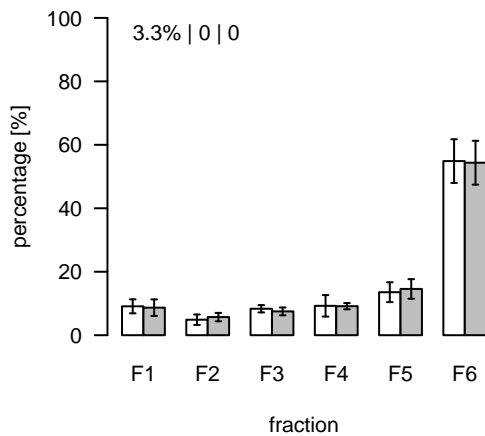

**L638 (m/z=781.589073; rt=4.95185)**  
T/S Cluster: L-5-1

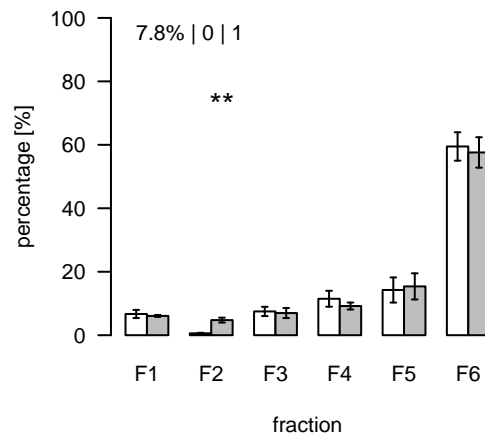

**L663 (m/z=818.471707; rt=5.01516)**  
T/S Cluster: L-5-1

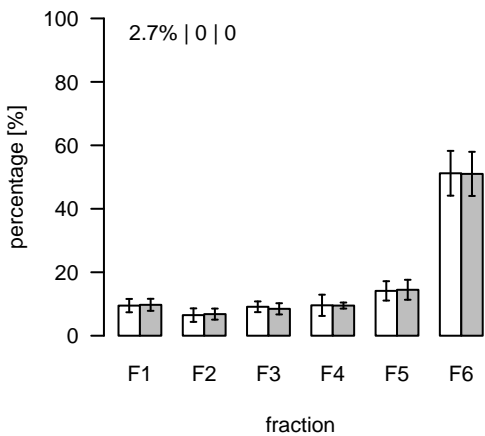

**L636 (m/z=583.438992; rt=4.95077)**  
T/S Cluster: L-5-1

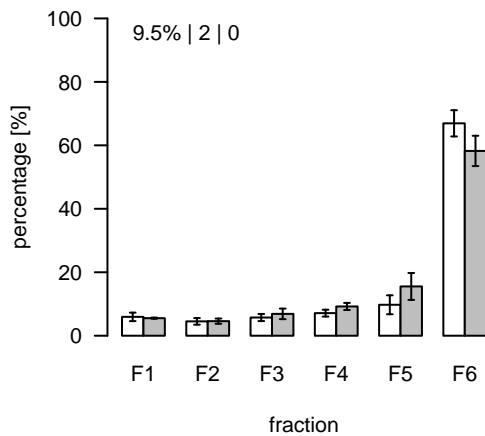

**L650 (m/z=781.477537; rt=4.95317)**  
T/S Cluster: L-5-1

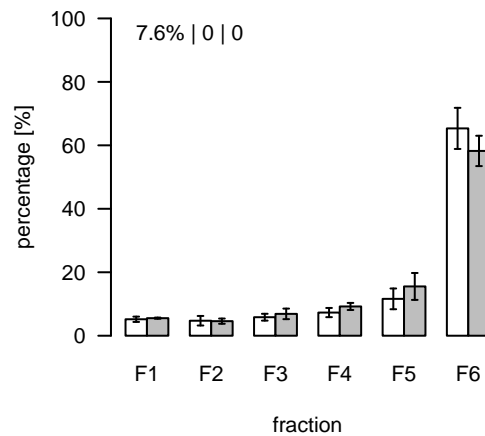

**L661 (m/z=818.554508; rt=5.01452)**  
T/S Cluster: L-5-1

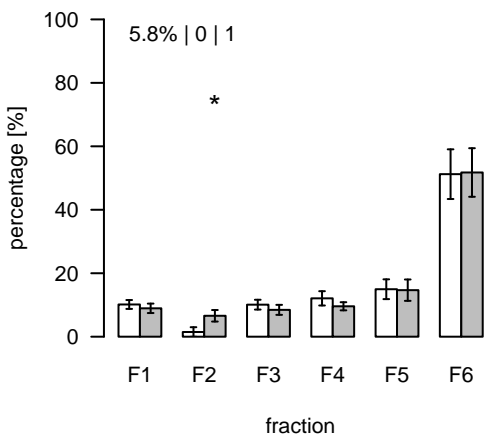

**L639 (m/z=780.601868; rt=4.95212)**  
T/S Cluster: L-5-1

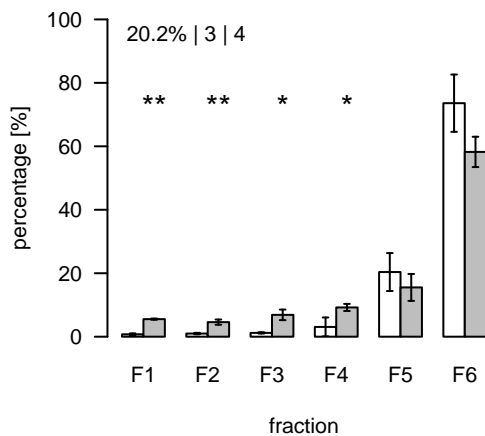

**L646 (m/z=390.767486; rt=4.95286)**  
T/S Cluster: L-5-1

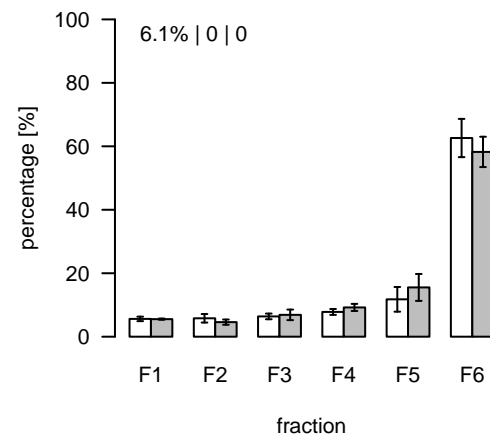

**L647 (m/z=390.765844; rt=4.95295)**  
T/S Cluster: L-5-1

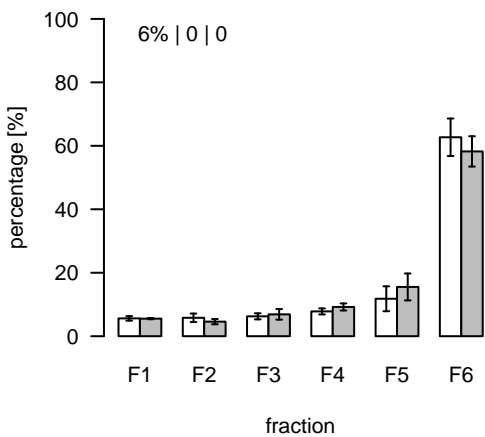

**L637 (m/z=583.423482; rt=4.95125)**  
T/S Cluster: L-5-1

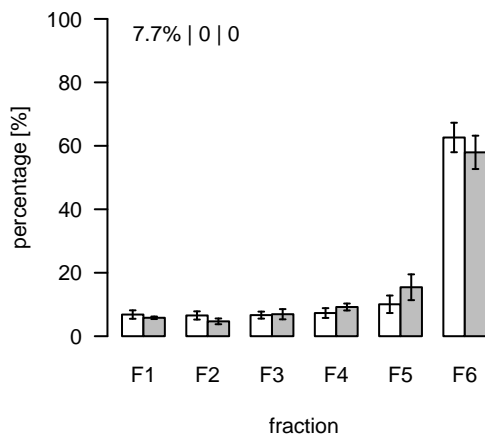

**L641 (m/z=785.49476; rt=4.95249)**  
T/S Cluster: L-5-2

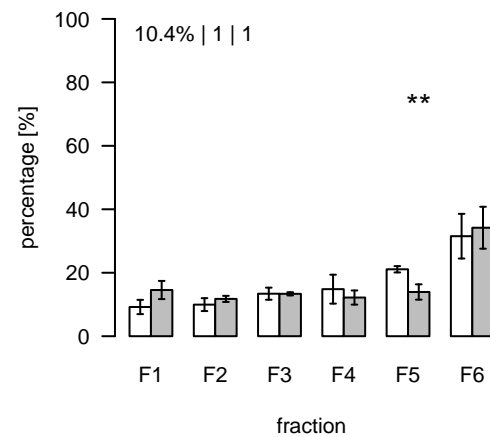

**L642 (m/z=785.484747; rt=4.9527)**  
T/S Cluster: L-5-2

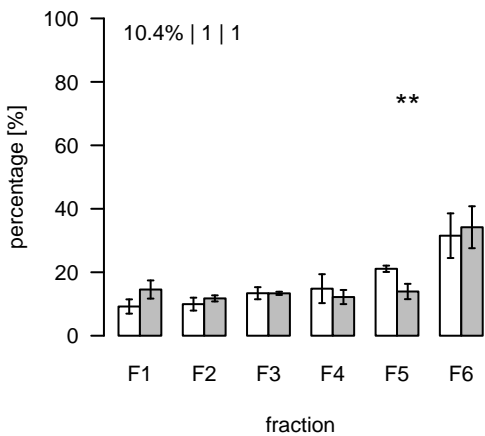

**L643 (m/z=785.475774; rt=4.95277)**  
T/S Cluster: L-5-2

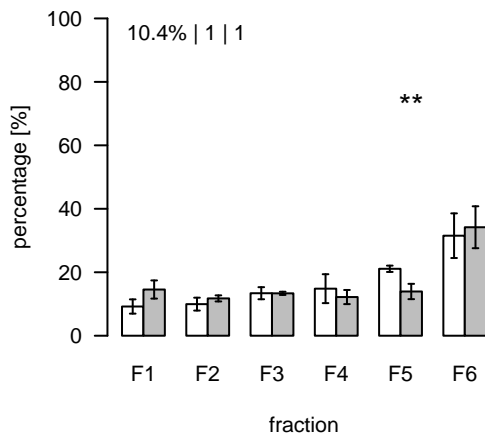

**L653 (m/z=790.56451; rt=5.00949)**  
T/S Cluster: L-5-3

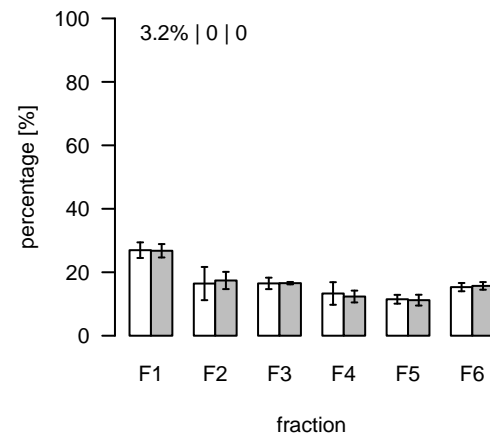



**L654 (m/z=790.548373; rt=5.00952)**  
T/S Cluster: L-5-3

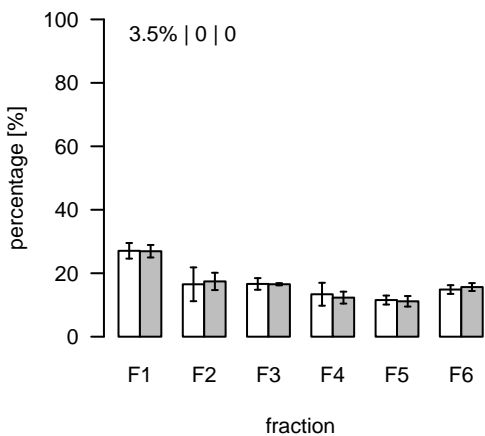

**L656 (m/z=791.549219; rt=5.00987)**  
T/S Cluster: L-5-3

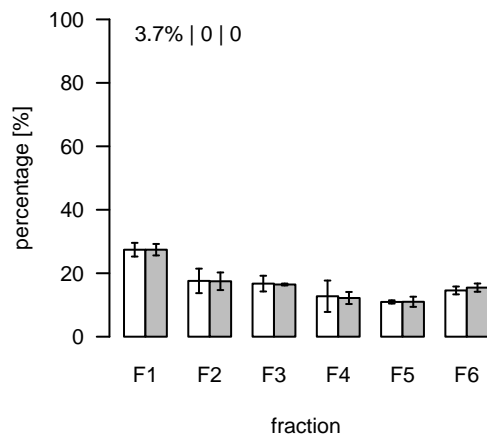

**L655 (m/z=791.571729; rt=5.00967)**  
T/S Cluster: L-5-3

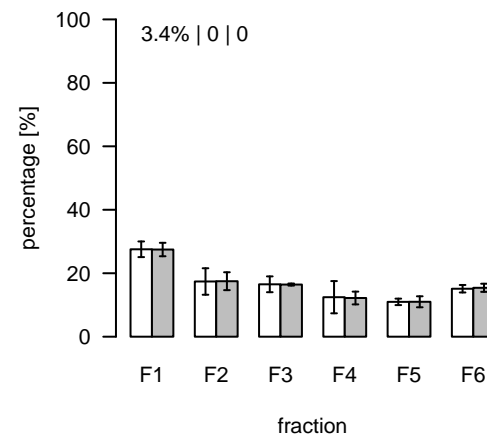

**L659 (m/z=395.282615; rt=5.014)**  
T/S Cluster: L-5-3

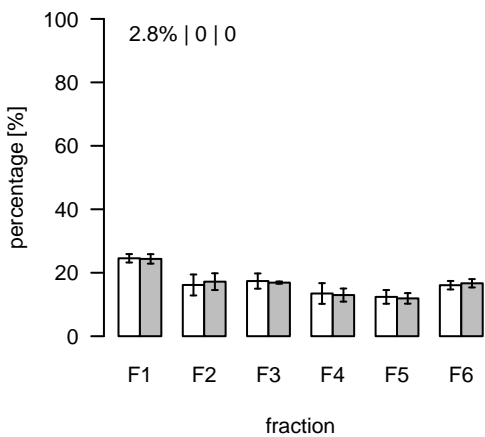

**L658 (m/z=827.539411; rt=5.01399)**  
T/S Cluster: L-5-4

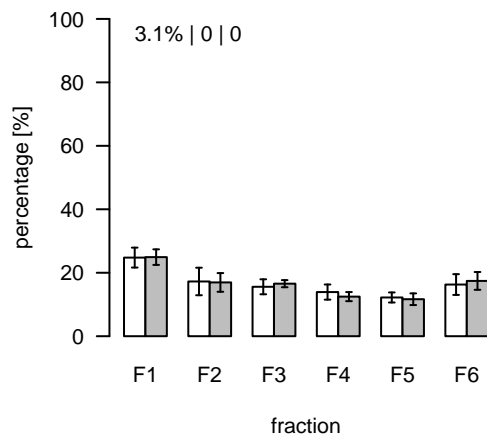

**L657 (m/z=827.52213; rt=5.01227)**  
T/S Cluster: L-5-4

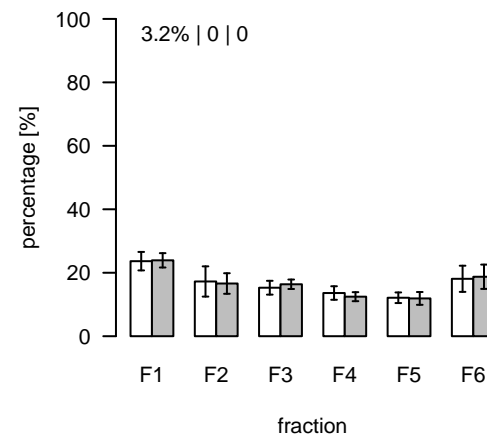

**L664 (m/z=828.509645; rt=5.01521)**  
T/S Cluster: L-5-5

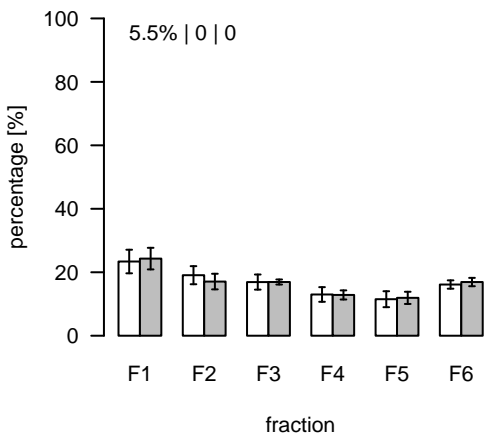

**L669 (m/z=828.540189; rt=5.01755)**  
T/S Cluster: L-5-6

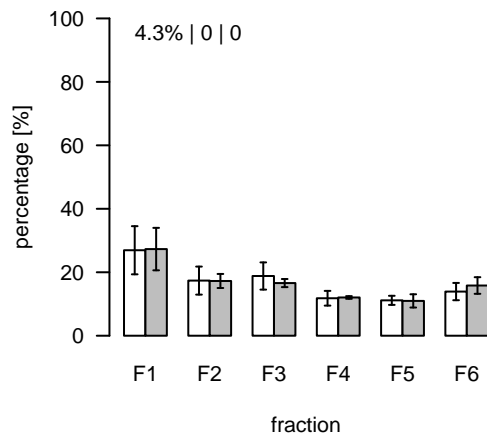

**L668 (m/z=828.529762; rt=5.01712)**  
T/S Cluster: L-5-6

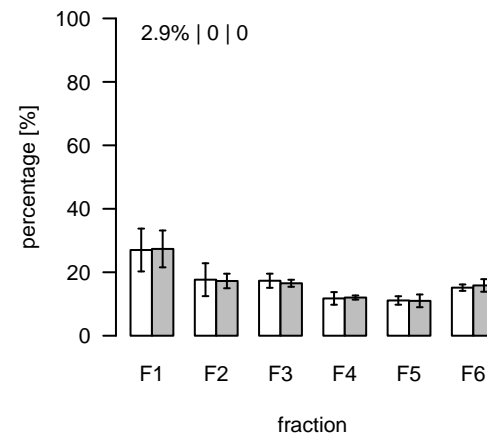

**L671 (m/z=822.463007; rt=5.02013)**  
T/S Cluster: L-5-7

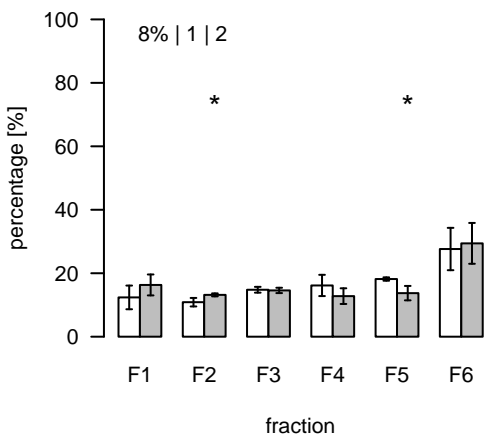

**L673 (m/z=814.575262; rt=5.04338)**  
T/S Cluster: L-5-8

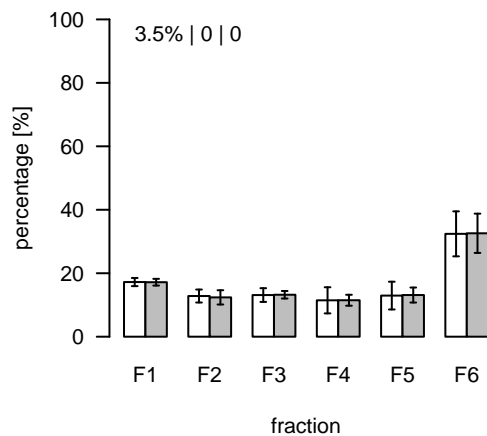

**L675 (m/z=814.562839; rt=5.04404)**  
T/S Cluster: L-5-8

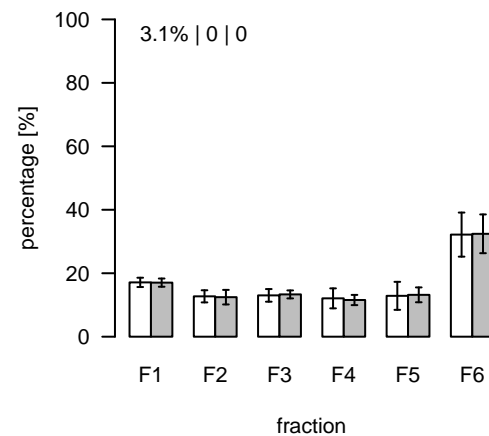

**L676 (m/z=814.553616; rt=5.04449)**  
T/S Cluster: L-5-8

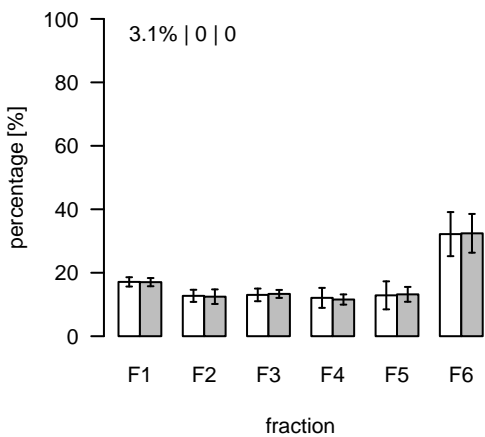

**L672 (m/z=815.567107; rt=5.04212)**  
T/S Cluster: L-5-8

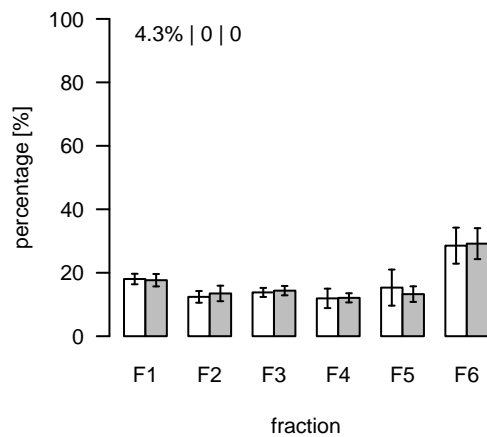

**L677 (m/z=836.604221; rt=5.04905)**  
T/S Cluster: L-5-9

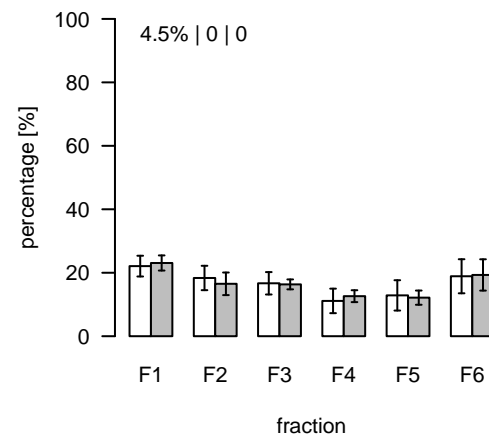

**L674 (m/z=836.578991; rt=5.04352)**  
T/S Cluster: L-5-9

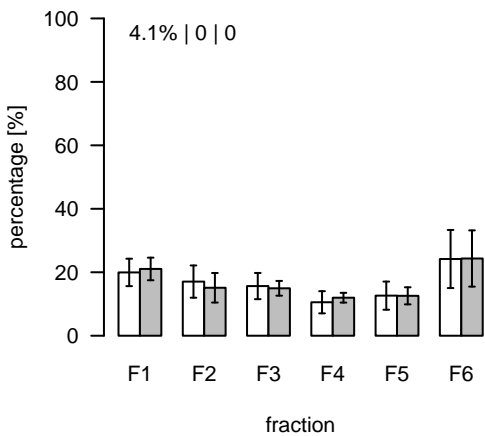

**L679 (m/z=778.514392; rt=5.051)**  
T/S Cluster: L-5.1-1

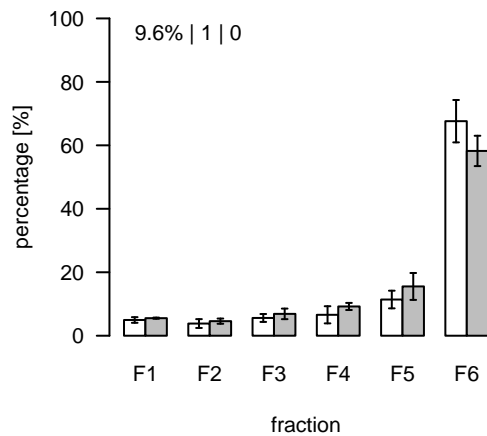

**L693 (m/z=1006.593793; rt=5.10162)**  
T/S Cluster: L-5.1-1

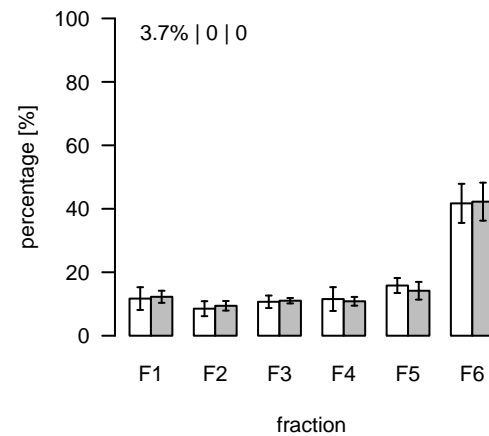

**L694 (m/z=1006.55835; rt=5.10177)**  
T/S Cluster: L-5.1-1

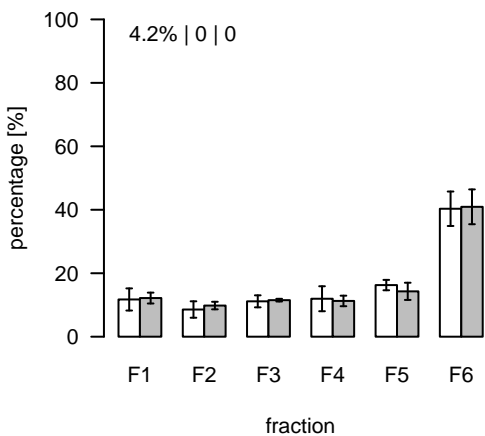

**L680 (m/z=779.517753; rt=5.05109)**  
T/S Cluster: L-5.1-1

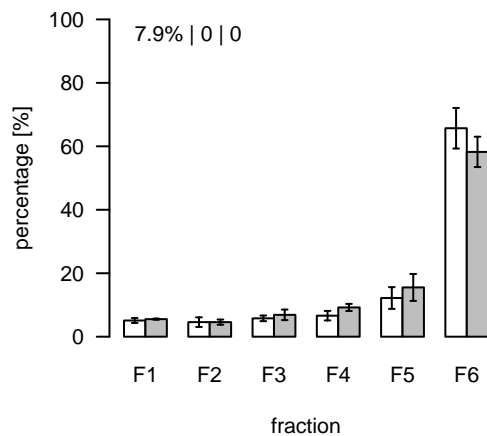

**L681 (m/z=779.518724; rt=5.05112)**  
T/S Cluster: L-5.1-1

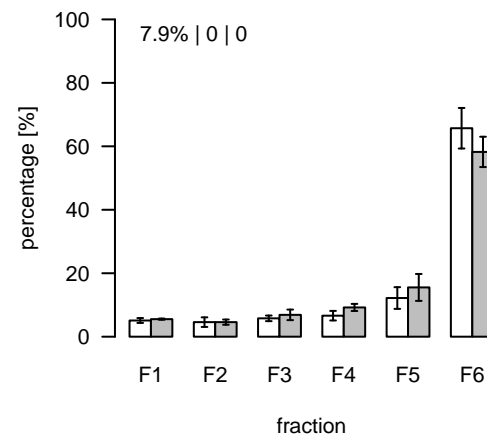

**L692 (m/z=1007.594574; rt=5.09929)**  
T/S Cluster: L-5.1-1

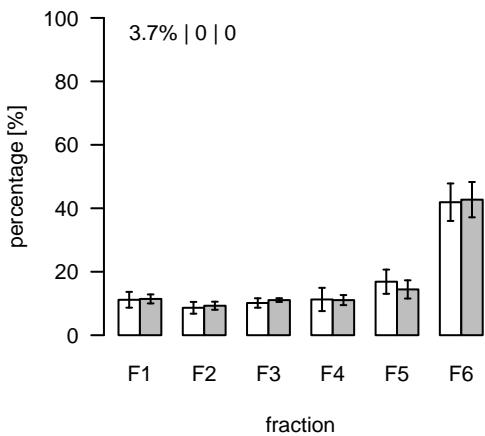

**L678 (m/z=778.475363; rt=5.0503)**  
T/S Cluster: L-5.1-1

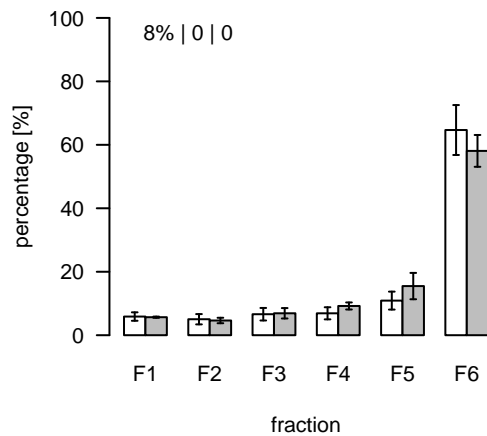

**L682 (m/z=783.469663; rt=5.05258)**  
T/S Cluster: L-5.1-1

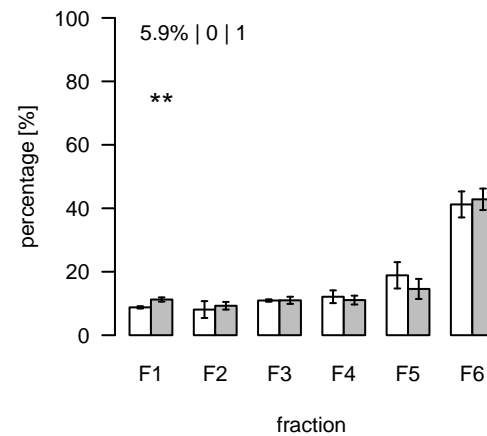

**L691 (m/z=1008.590818; rt=5.09888)**  
T/S Cluster: L-5.1-1

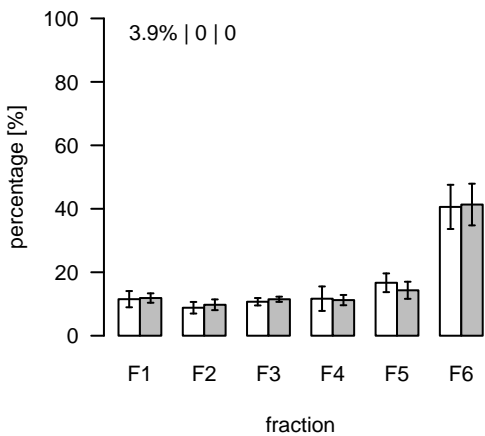

**L695 (m/z=964.669269; rt=5.11411)**  
T/S Cluster: L-5.1-1

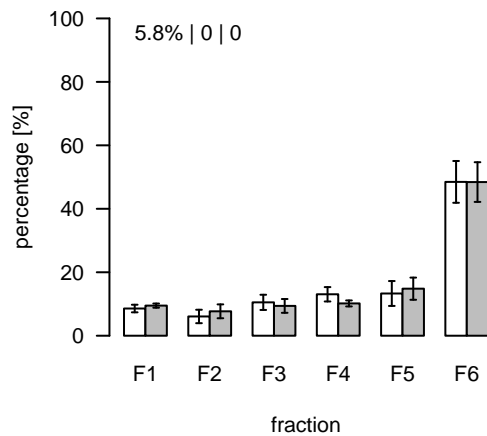

**L683 (m/z=778.566989; rt=5.0536)**  
T/S Cluster: L-5.1-1

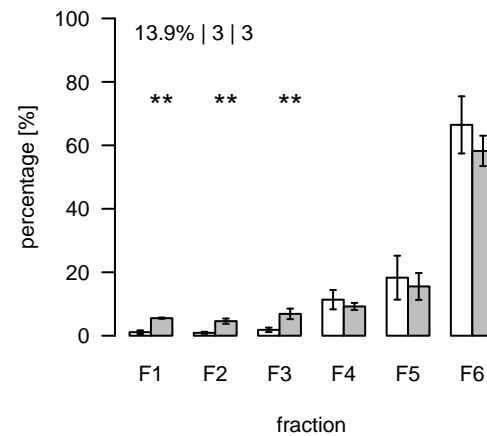

**L684 (m/z=786.536835; rt=5.06196)**  
T/S Cluster: L-5.1-2

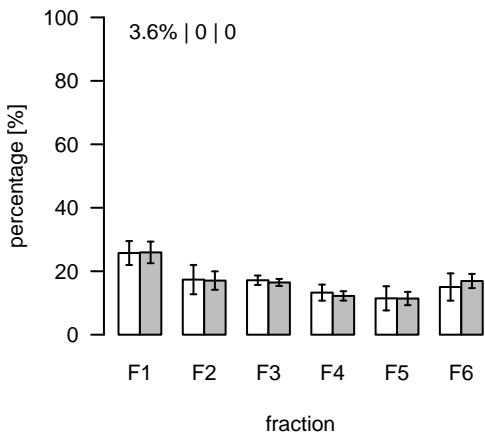

**L689 (m/z=804.523926; rt=5.0817)**  
T/S Cluster: L-5.1-3

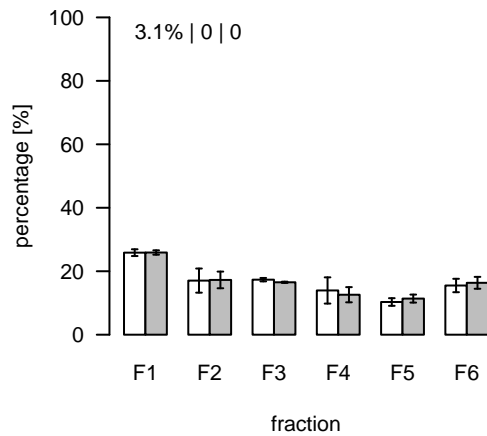

**L688 (m/z=804.539538; rt=5.07933)**  
T/S Cluster: L-5.1-3

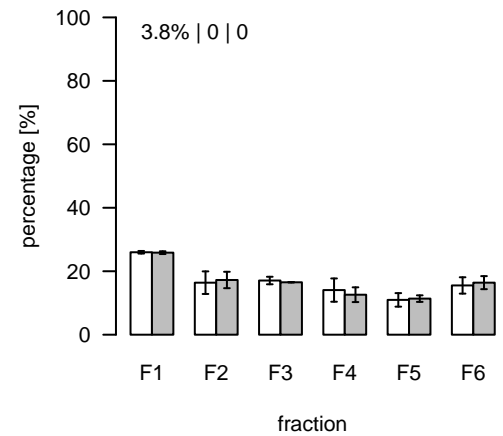

**L686 (m/z=804.547664; rt=5.07773)**  
T/S Cluster: L-5.1-3

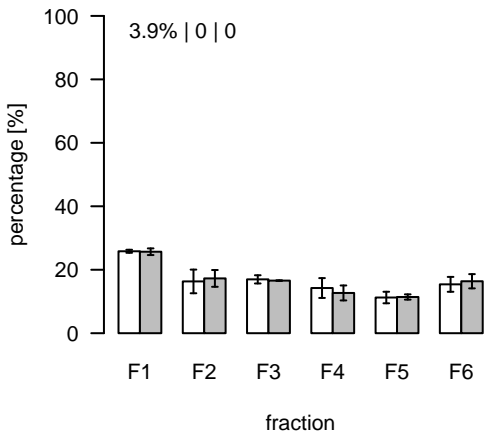

**L685 (m/z=804.566647; rt=5.0755)**  
T/S Cluster: L-5.1-3

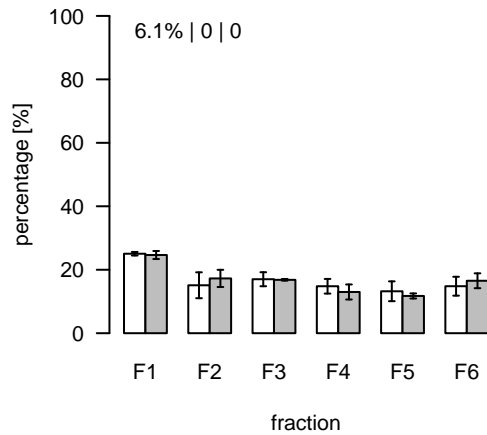

**L687 (m/z=787.538946; rt=5.07792)**  
T/S Cluster: L-5.1-4

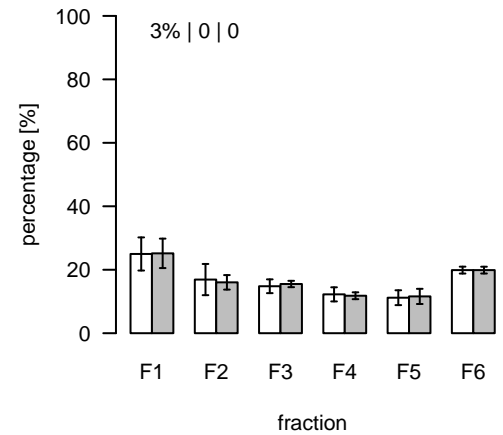

**L690 (m/z=830.511992; rt=5.09241)**  
T/S Cluster: L-5.1-5

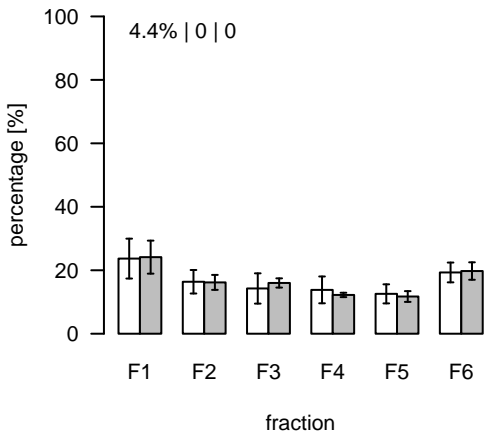

**L696 (m/z=964.624911; rt=5.11444)**  
T/S Cluster: L-5.1-6

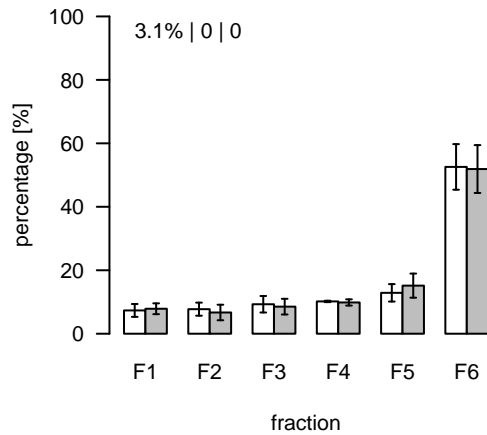

**L697 (m/z=964.628956; rt=5.11462)**  
T/S Cluster: L-5.1-6

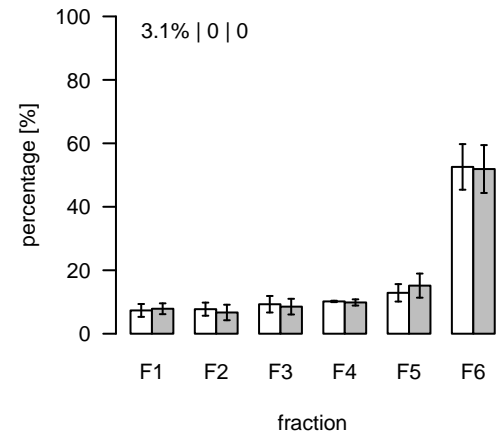

**L698 (m/z=789.587463; rt=5.1255)**  
T/S Cluster: L-5.1-7

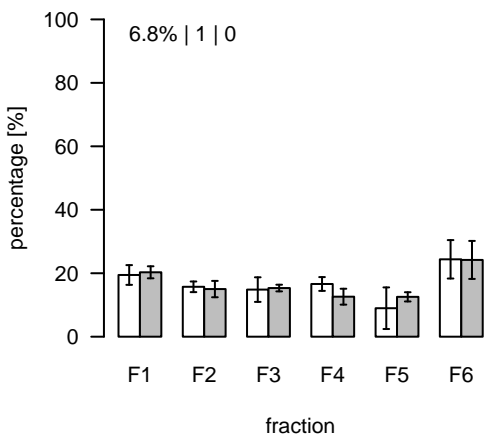

**L699 (m/z=788.591609; rt=5.1264)**  
T/S Cluster: L-5.1-8

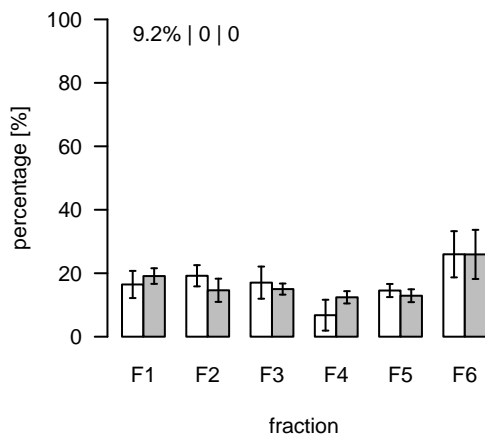

**L701 (m/z=788.546324; rt=5.12672)**  
T/S Cluster: L-5.1-9

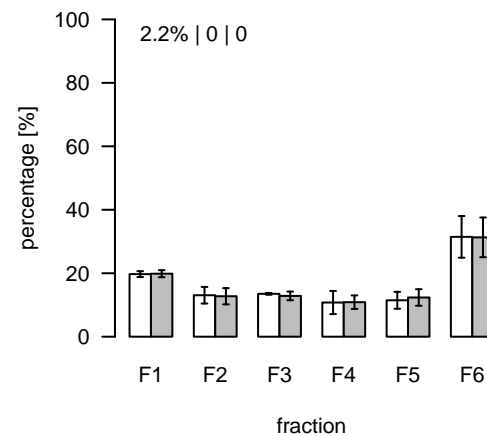

**L700 (m/z=789.551052; rt=5.12657)**  
T/S Cluster: L-5.1-9

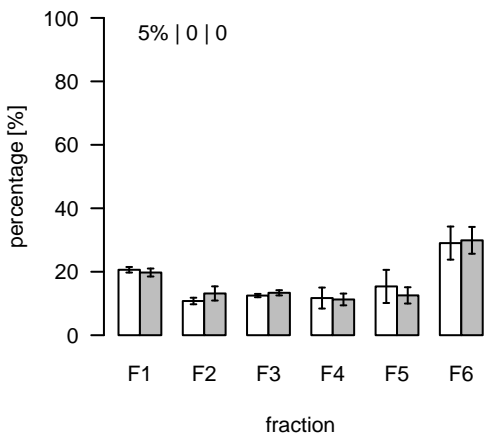

**L702 (m/z=852.553187; rt=5.16227)**  
T/S Cluster: L-5.2-1

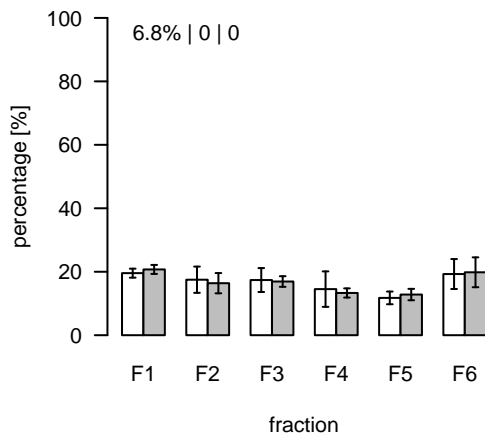

**L703 (m/z=812.552043; rt=5.19169)**  
T/S Cluster: L-5.2-2

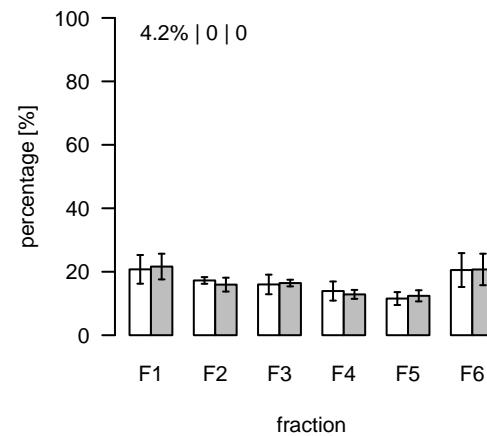

**L705 (m/z=730.509594; rt=5.19619)**  
T/S Cluster: L-5.2-3

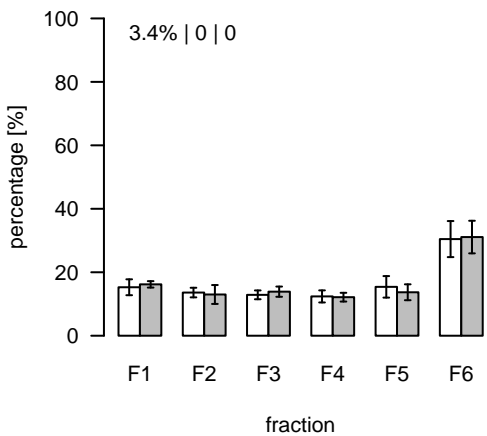

**L704 (m/z=730.493143; rt=5.19408)**  
T/S Cluster: L-5.2-3

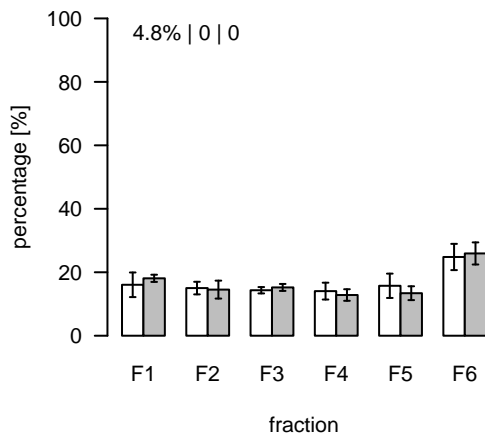

**L714 (m/z=780.528627; rt=5.22352)**  
T/S Cluster: L-5.2-4

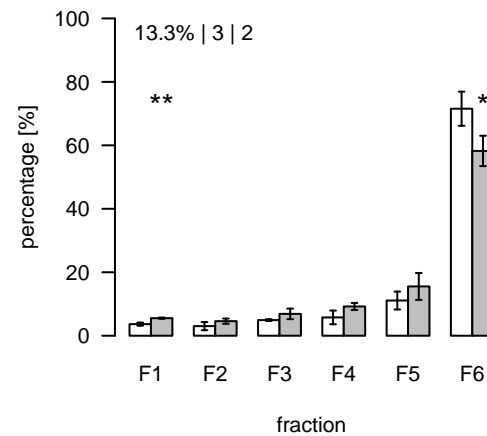

**L711 (m/z=785.485186; rt=5.21984)**  
T/S Cluster: L-5.2-4

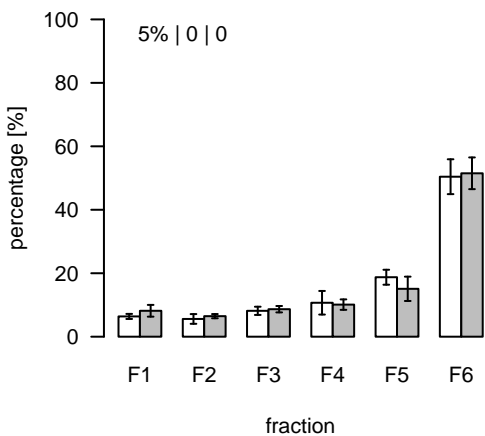

**L709 (m/z=785.494856; rt=5.21652)**  
T/S Cluster: L-5.2-4

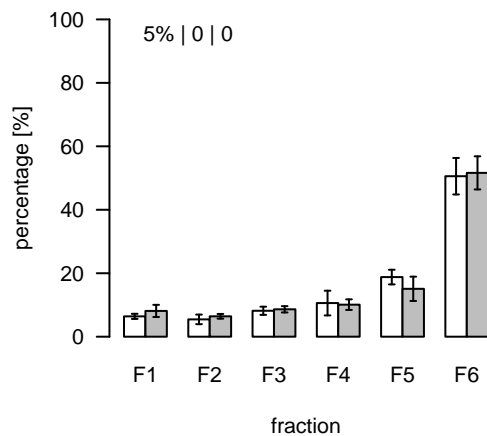

**L713 (m/z=781.533134; rt=5.22334)**  
T/S Cluster: L-5.2-4

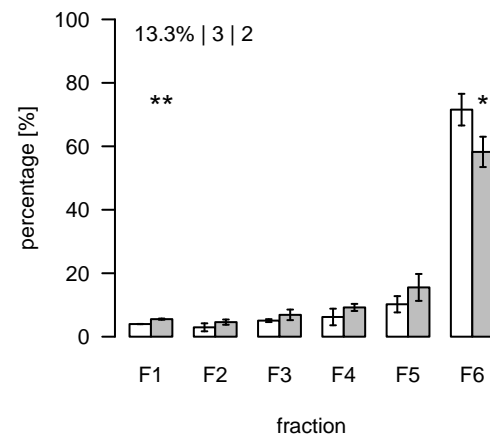

**L712 (m/z=786.48602; rt=5.22187)**  
T/S Cluster: L-5.2-4

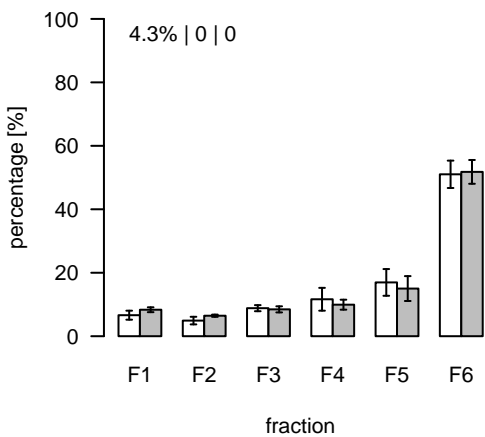

**L706 (m/z=782.542057; rt=5.20913)**  
T/S Cluster: L-5.2-4

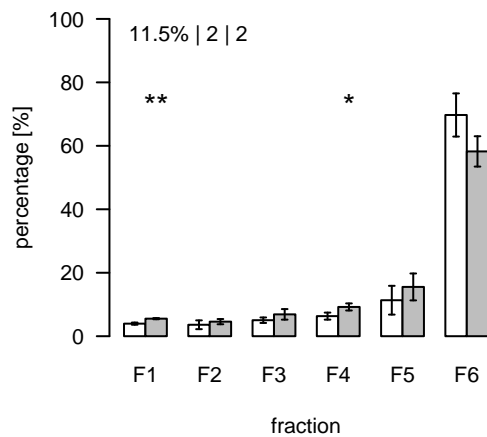

**L715 (m/z=786.509096; rt=5.22488)**  
T/S Cluster: L-5.2-4

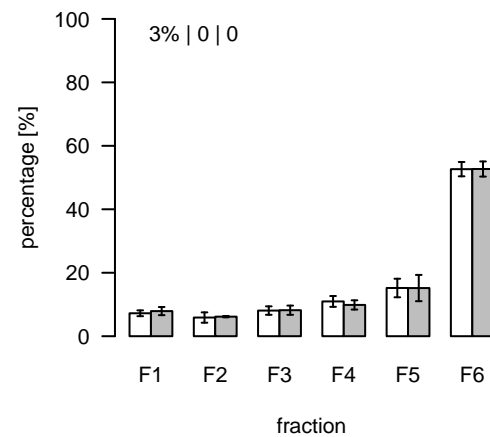

**L710 (m/z=785.531198; rt=5.21845)**  
T/S Cluster: L-5.2-4

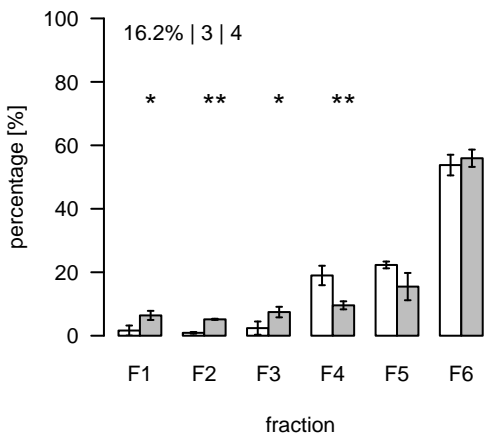

**L708 (m/z=787.490463; rt=5.21379)**  
T/S Cluster: L-5.2-4

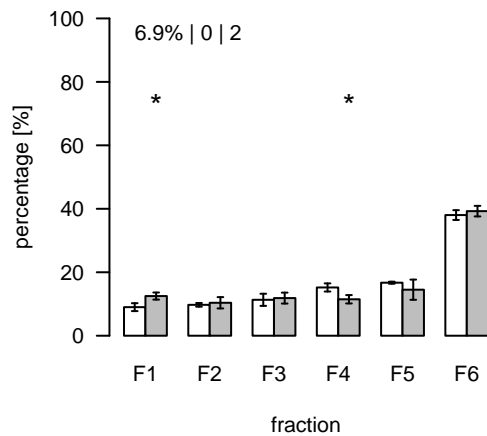

**L720 (m/z=790.548563; rt=5.23213)**  
T/S Cluster: L-5.2-5

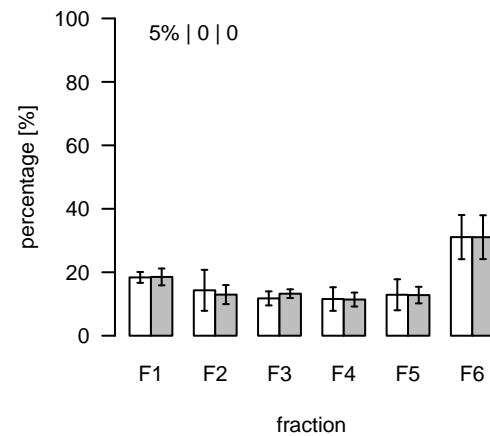

**L721 (m/z=790.565777; rt=5.23257)**  
T/S Cluster: L-5.2-5

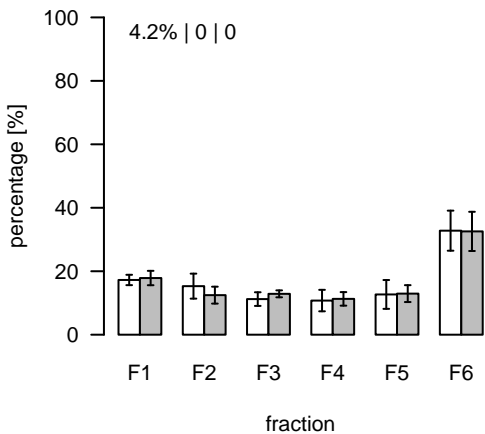

**L707 (m/z=782.504885; rt=5.2137)**  
T/S Cluster: L-5.2-5

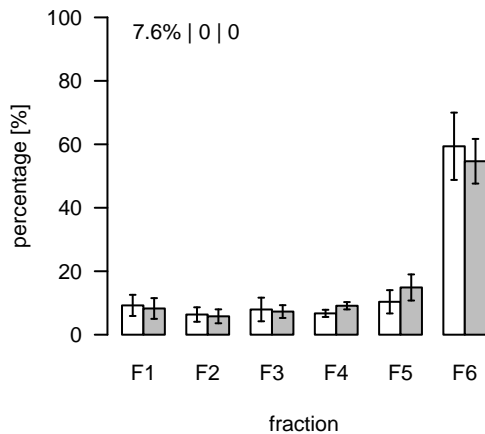

**L716 (m/z=795.517428; rt=5.22862)**  
T/S Cluster: L-5.2-6

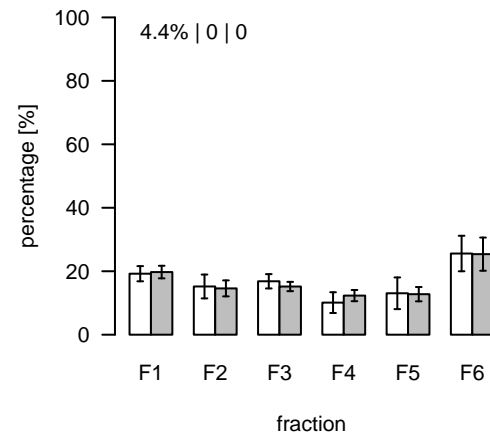

**L717 (m/z=795.542986; rt=5.22969)**  
T/S Cluster: L-5.2-6

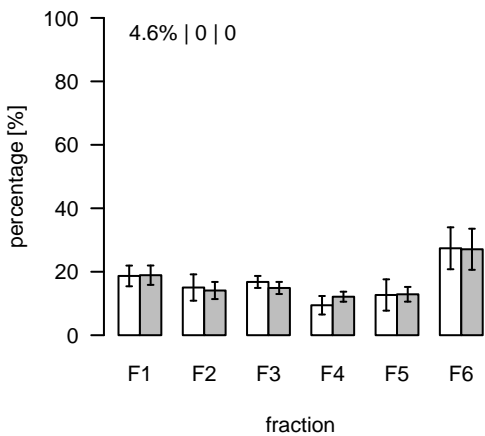

**L719 (m/z=794.538157; rt=5.23147)**  
T/S Cluster: L-5.2-7

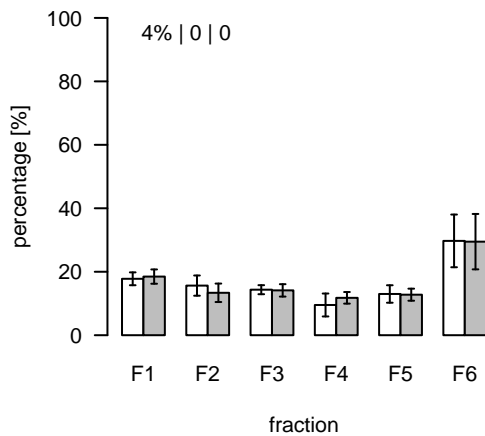

**L718 (m/z=794.508086; rt=5.23126)**  
T/S Cluster: L-5.2-7

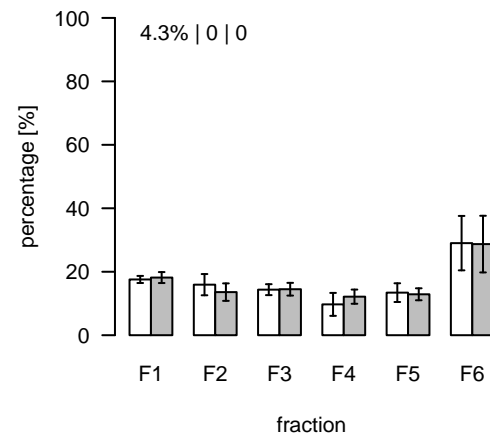

**L722 (m/z=398.271569; rt=5.24916)**  
T/S Cluster: L-5.2-8

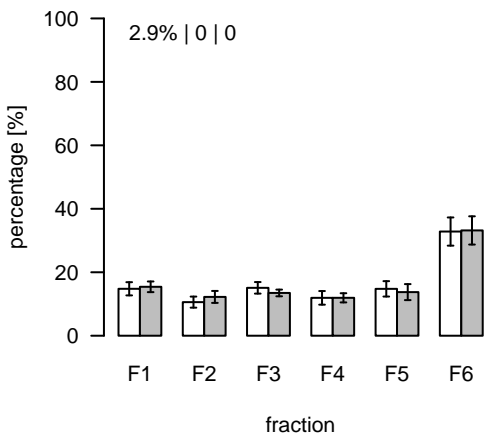

**L733 (m/z=796.553455; rt=5.28739)**  
T/S Cluster: L-5.3-1

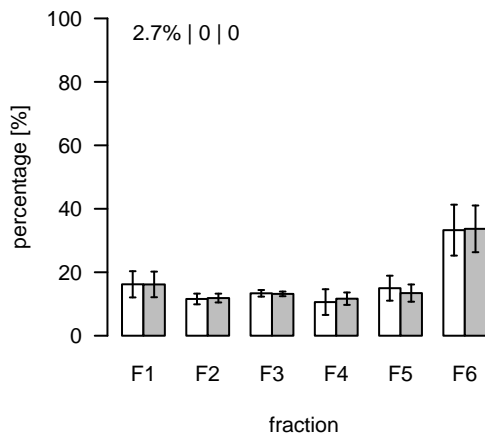

**L734 (m/z=796.530453; rt=5.28753)**  
T/S Cluster: L-5.3-1

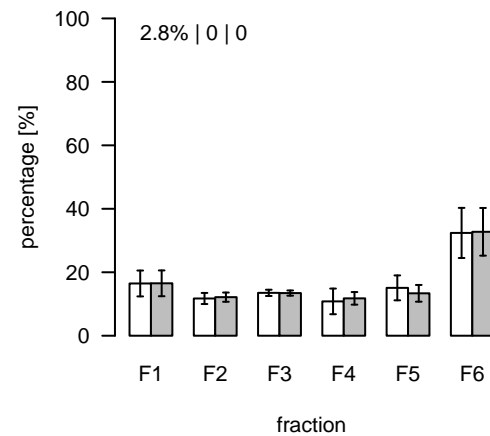

**L745 (m/z=794.538256; rt=5.32381)**  
T/S Cluster: L-5.3-1

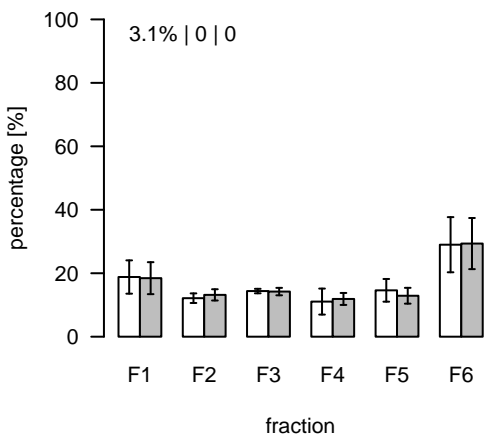

**L732 (m/z=797.558069; rt=5.28692)**  
T/S Cluster: L-5.3-1

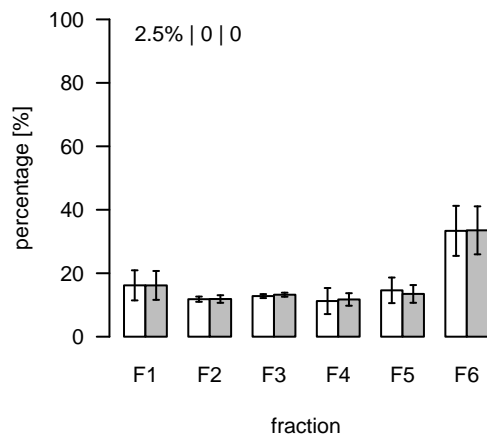

**L731 (m/z=797.531631; rt=5.28682)**  
T/S Cluster: L-5.3-1

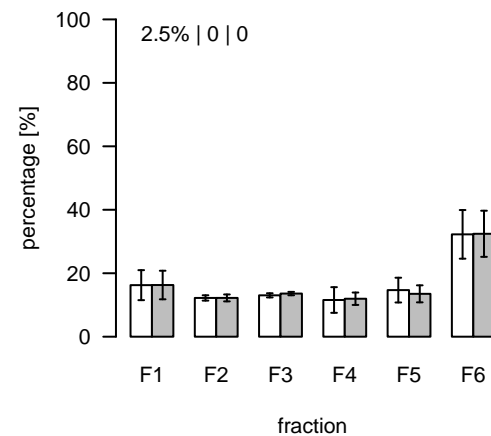

**L748 (m/z=794.507988; rt=5.32418)**  
T/S Cluster: L-5.3-1

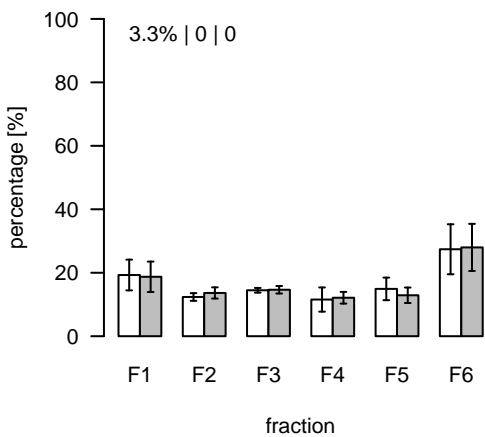

**L746 (m/z=795.543445; rt=5.32396)**  
T/S Cluster: L-5.3-1

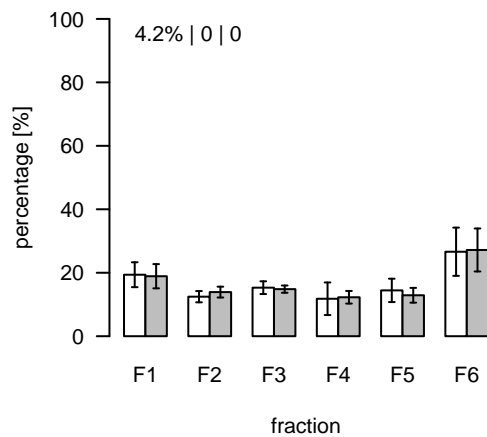

**L728 (m/z=398.277468; rt=5.28564)**  
T/S Cluster: L-5.3-1

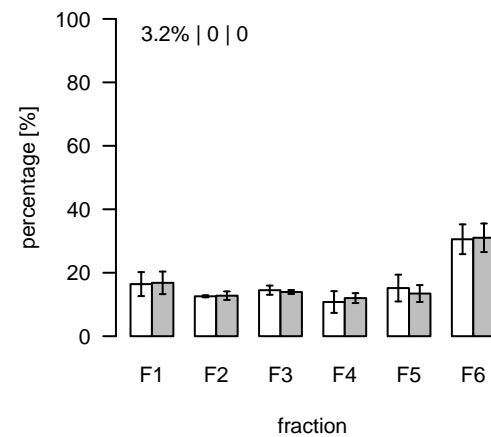

**L747 (m/z=795.517665; rt=5.32408)**  
T/S Cluster: L-5.3-1

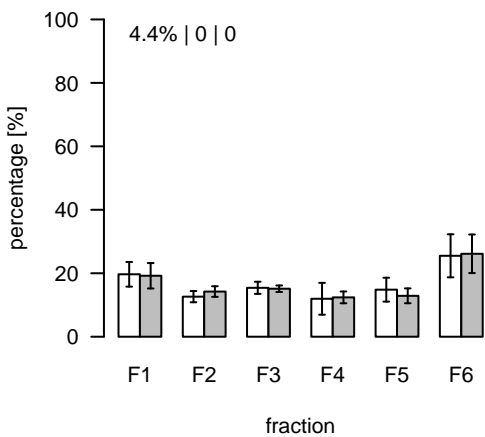

**L727 (m/z=798.566932; rt=5.28473)**  
T/S Cluster: L-5.3-1

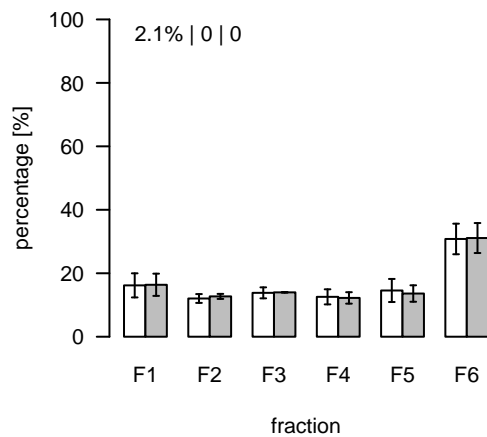

**L725 (m/z=798.548404; rt=5.28208)**  
T/S Cluster: L-5.3-1

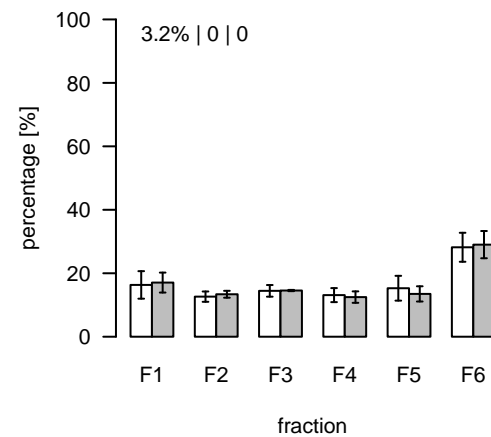



**L723 (m/z=798.561422; rt=5.25054)**  
T/S Cluster: L-5.3-1

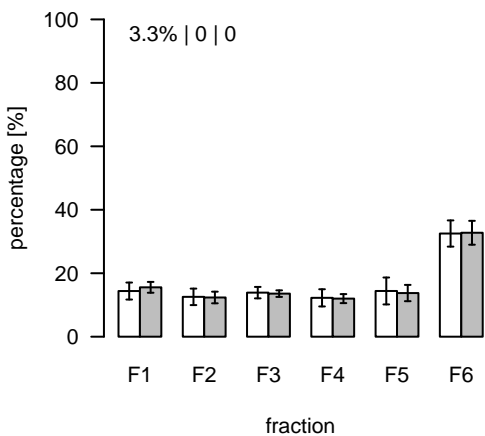

**L750 (m/z=397.267852; rt=5.32432)**  
T/S Cluster: L-5.3-1

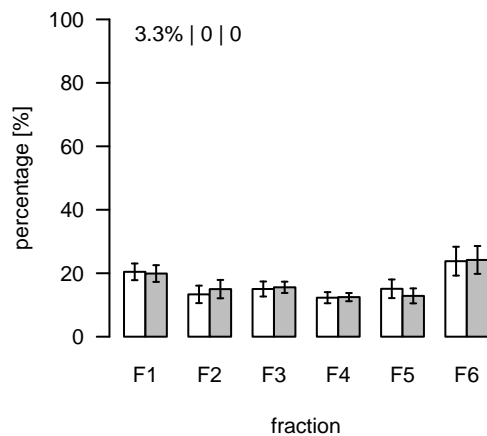

**L749 (m/z=397.274583; rt=5.32431)**  
T/S Cluster: L-5.3-1

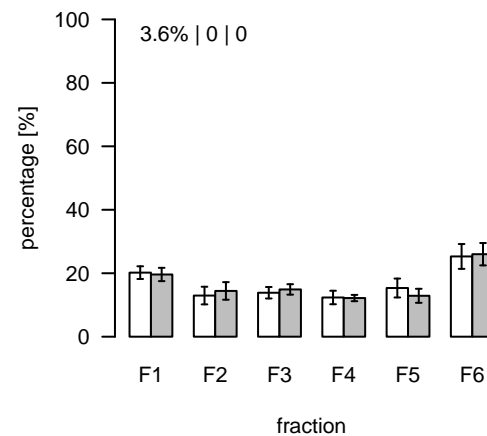

**L724 (m/z=824.522726; rt=5.25319)**  
T/S Cluster: L-5.3-2

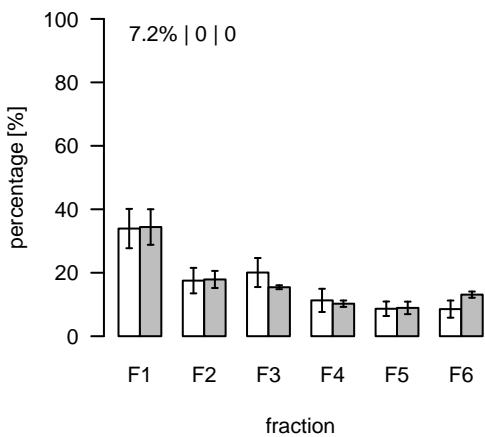

**L730 (m/z=826.518435; rt=5.28653)**  
T/S Cluster: L-5.3-2

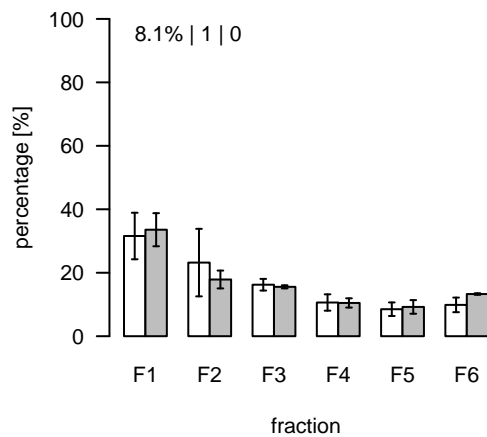

**L738 (m/z=826.519534; rt=5.29527)**  
T/S Cluster: L-5.3-2

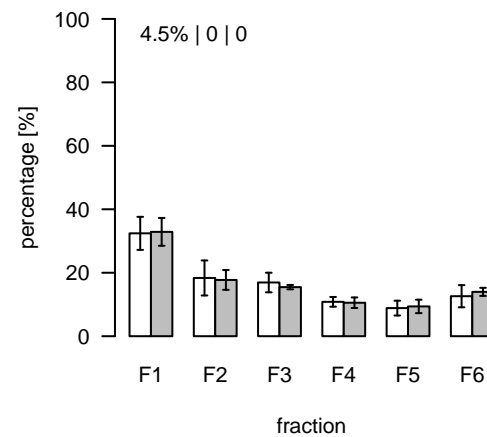

**L726 (m/z=826.543911; rt=5.28457)**  
T/S Cluster: L-5.3-2

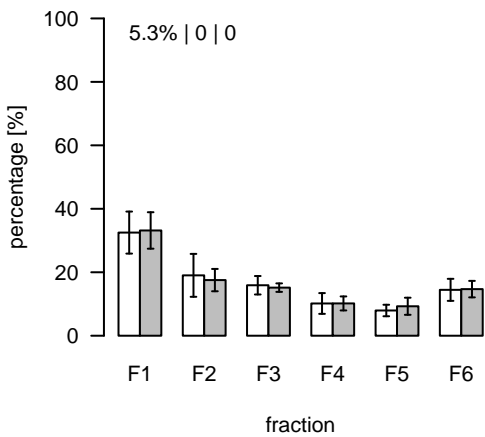

**L735 (m/z=824.524013; rt=5.28827)**  
T/S Cluster: L-5.3-3

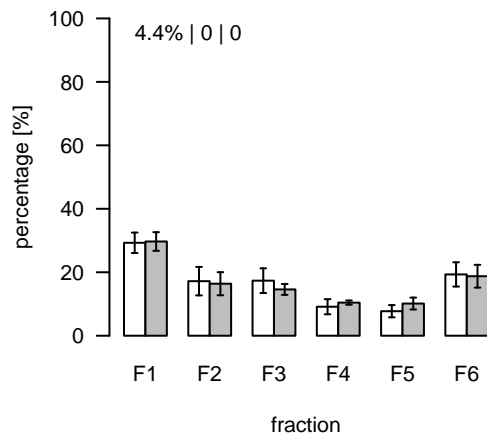

**L729 (m/z=825.524196; rt=5.28591)**  
T/S Cluster: L-5.3-3

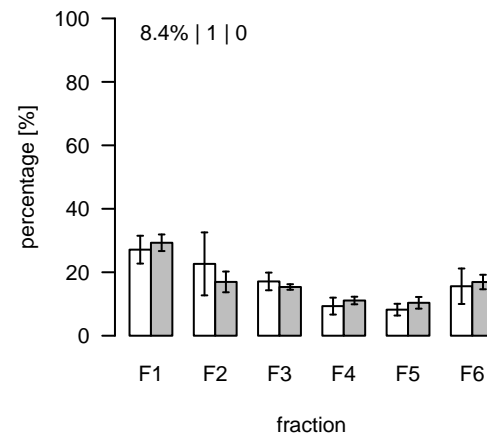

**L737 (m/z=825.549221; rt=5.29179)**  
T/S Cluster: L-5.3-3

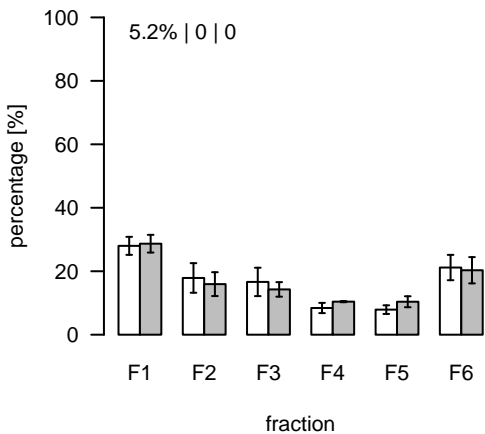

**L736 (m/z=827.528337; rt=5.2902)**  
T/S Cluster: L-5.3-4

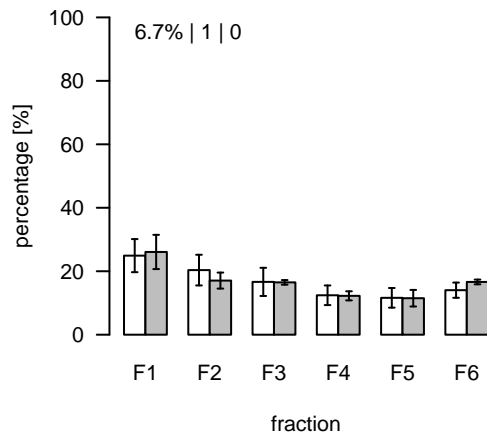

**L762 (m/z=808.56174; rt=5.33113)**  
T/S Cluster: L-5.3-5

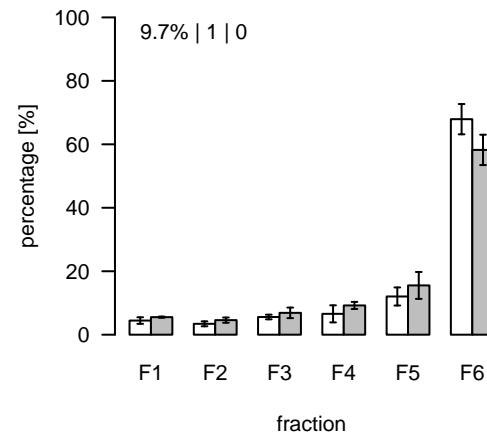

**L760 (m/z=809.56496; rt=5.33041)**  
T/S Cluster: L-5.3-5

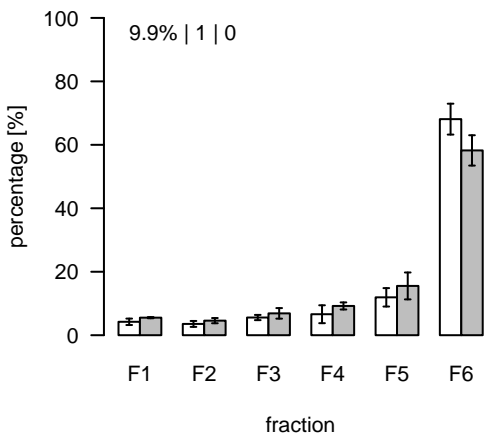

**L761 (m/z=809.543519; rt=5.33075)**  
T/S Cluster: L-5.3-5

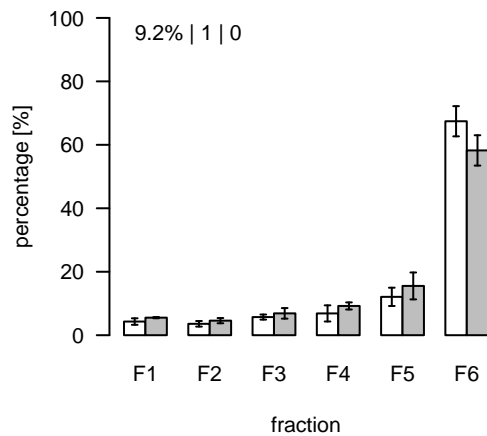

**L764 (m/z=813.517583; rt=5.33304)**  
T/S Cluster: L-5.3-5

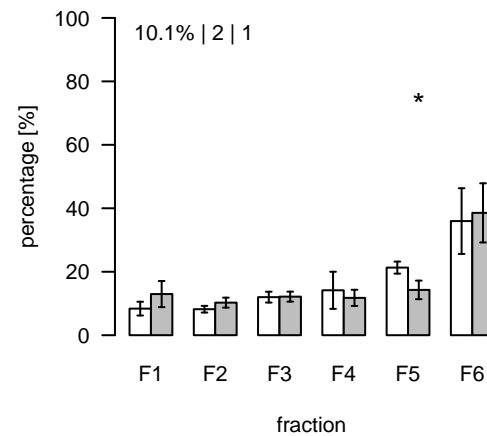

**L765 (m/z=813.512556; rt=5.33335)**  
T/S Cluster: L-5.3-5

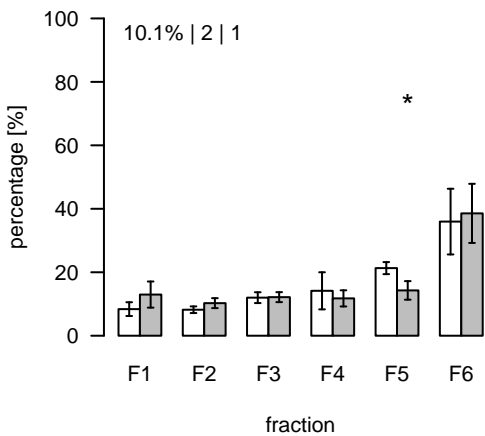

**L766 (m/z=813.507899; rt=5.33343)**  
T/S Cluster: L-5.3-5

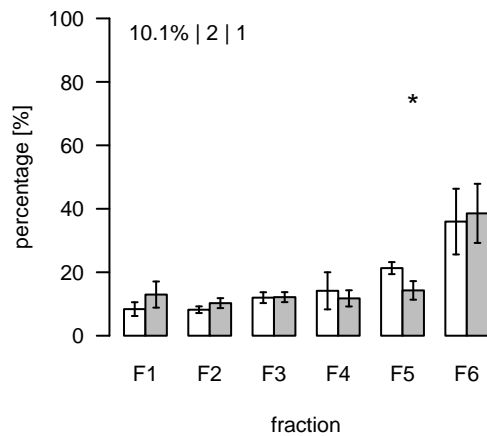

**L763 (m/z=814.515083; rt=5.33139)**  
T/S Cluster: L-5.3-5

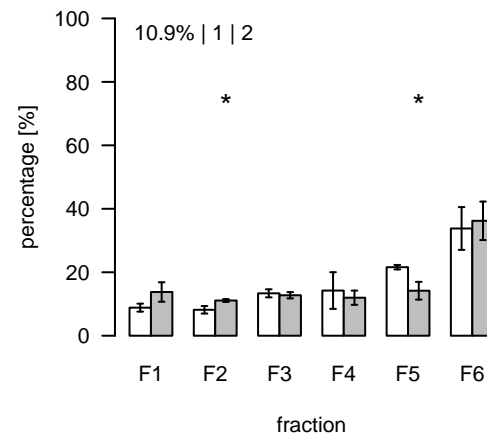

**L752 (m/z=808.510759; rt=5.3291)**  
T/S Cluster: L-5.3-5

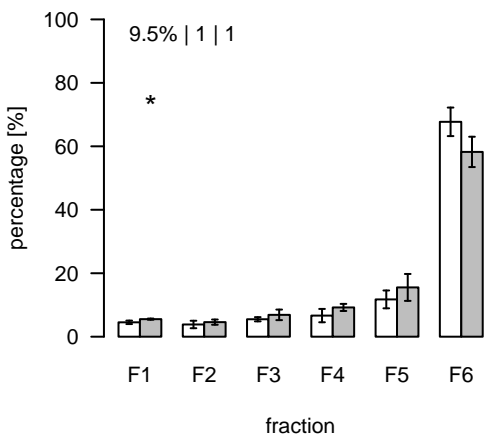

**L744 (m/z=970.616092; rt=5.30917)**  
T/S Cluster: L-5.3-5

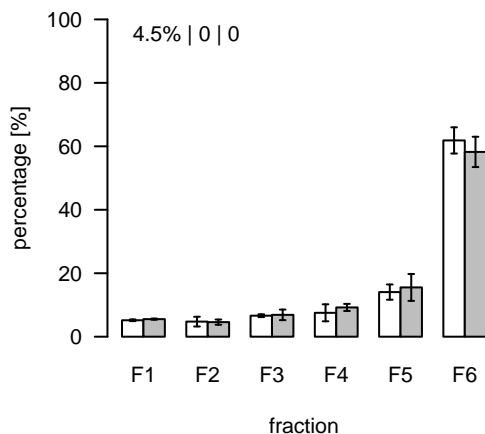

**L758 (m/z=810.57049; rt=5.33026)**  
T/S Cluster: L-5.3-5

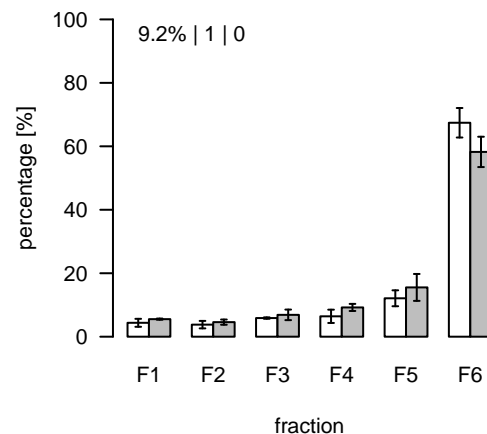

**L754 (m/z=404.281494; rt=5.3301)**  
T/S Cluster: L-5.3-5

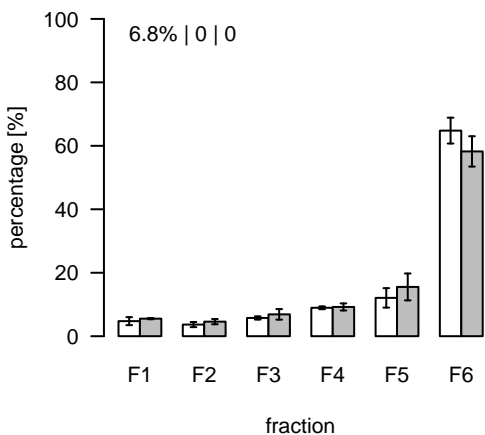

**L755 (m/z=808.612885; rt=5.33015)**  
T/S Cluster: L-5.3-5

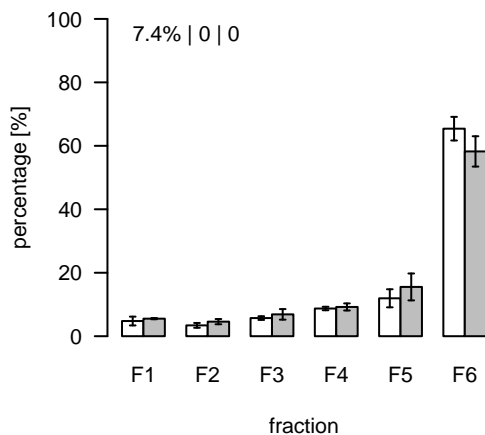

**L759 (m/z=810.546235; rt=5.33032)**  
T/S Cluster: L-5.3-5

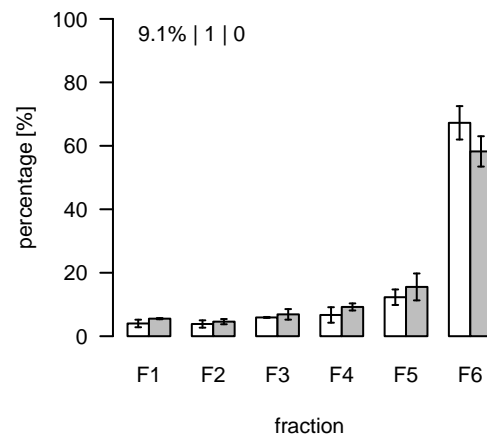

**L770 (m/z=812.500817; rt=5.34444)**  
T/S Cluster: L-5.3-5

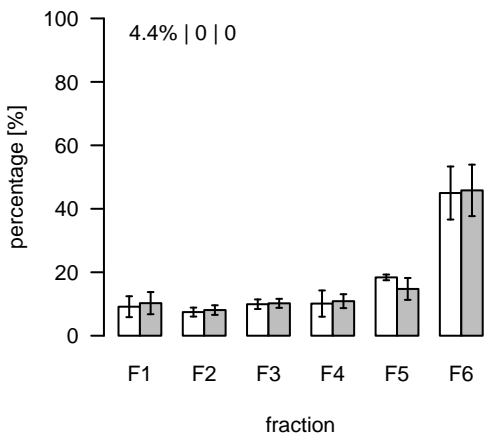

**L743 (m/z=971.619662; rt=5.30886)**  
T/S Cluster: L-5.3-5

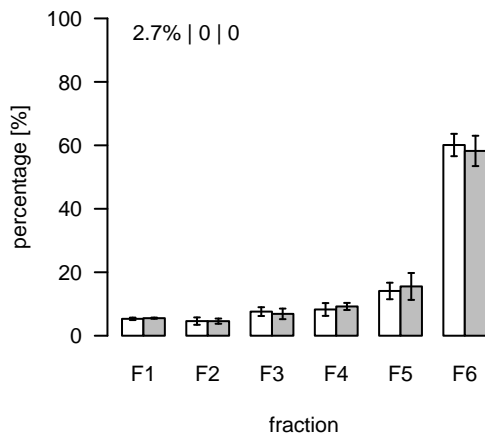

**L742 (m/z=971.587271; rt=5.30886)**  
T/S Cluster: L-5.3-5

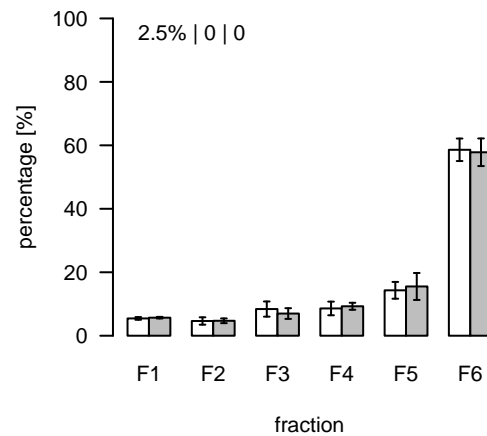

**L741 (m/z=970.561212; rt=5.30877)**  
T/S Cluster: L-5.3-5

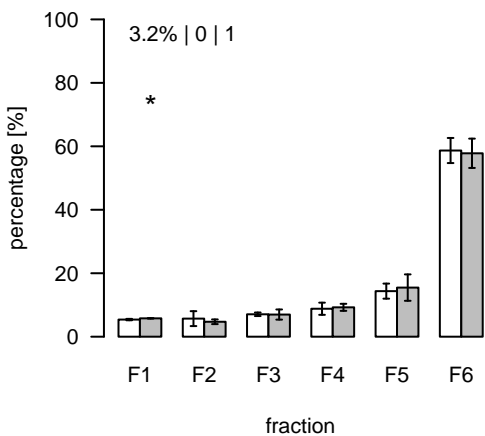

**L771 (m/z=811.5569; rt=5.34466)**  
T/S Cluster: L-5.3-5

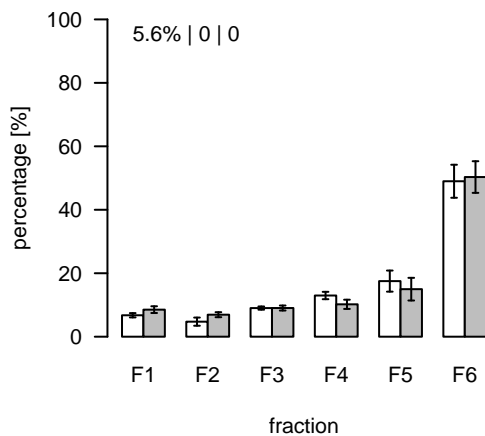

**L756 (m/z=611.470243; rt=5.3302)**  
T/S Cluster: L-5.3-5

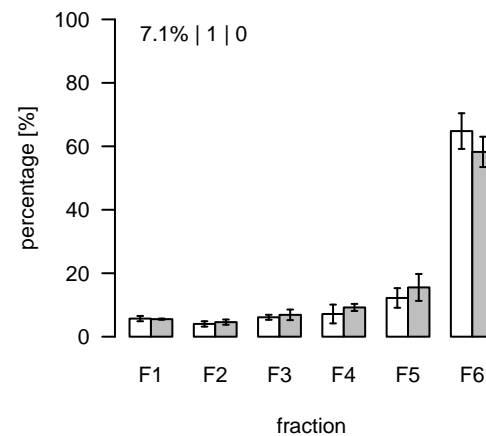

**L757 (m/z=611.45907; rt=5.33025)**  
T/S Cluster: L-5.3-5

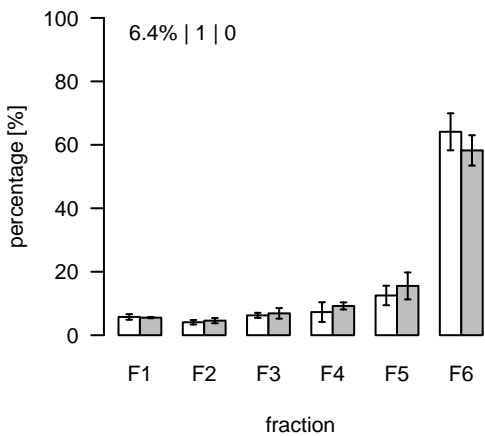

**L739 (m/z=972.627106; rt=5.30048)**  
T/S Cluster: L-5.3-5

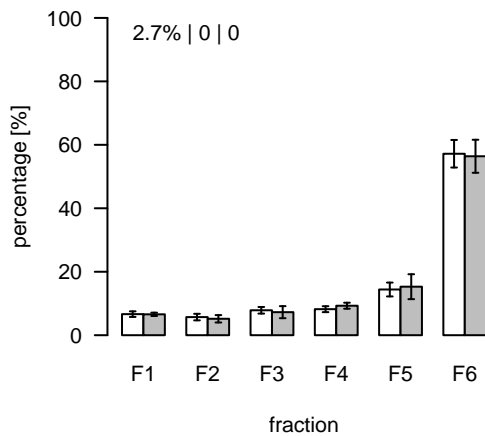

**L740 (m/z=972.594867; rt=5.3013)**  
T/S Cluster: L-5.3-5

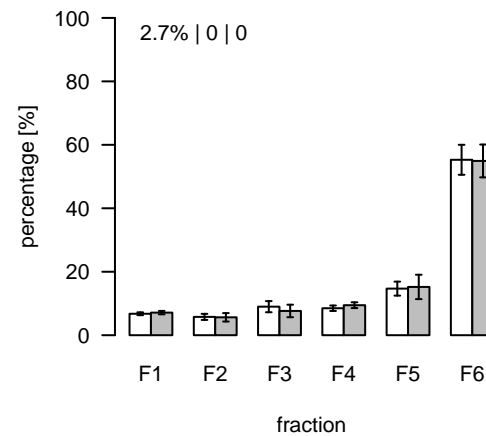

**L753 (m/z=404.271568; rt=5.32932)**  
T/S Cluster: L-5.3-5

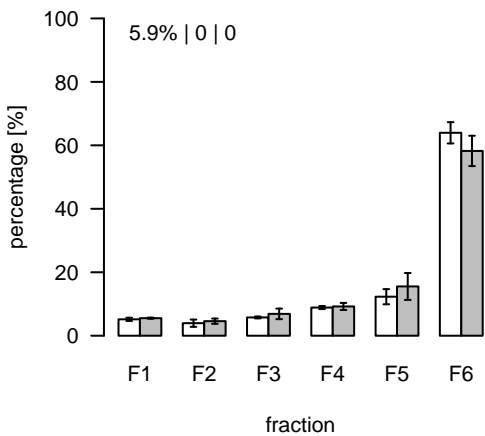

**L751 (m/z=827.493973; rt=5.32892)**  
T/S Cluster: L-5.3-6

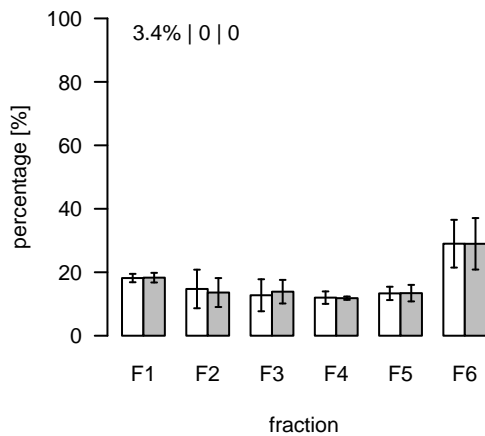

**L768 (m/z=804.540482; rt=5.3383)**  
T/S Cluster: L-5.3-7

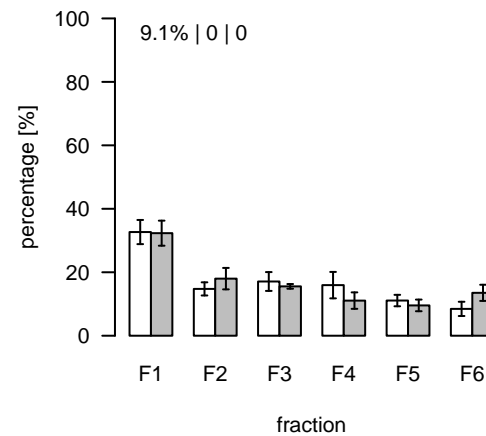

**L767 (m/z=804.534016; rt=5.33801)**  
T/S Cluster: L-5.3-7

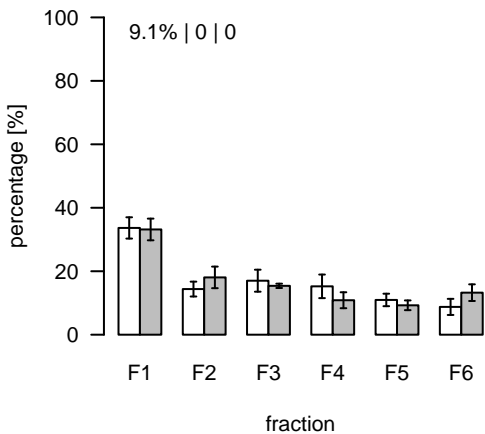

**L769 (m/z=804.55613; rt=5.34019)**  
T/S Cluster: L-5.3-7

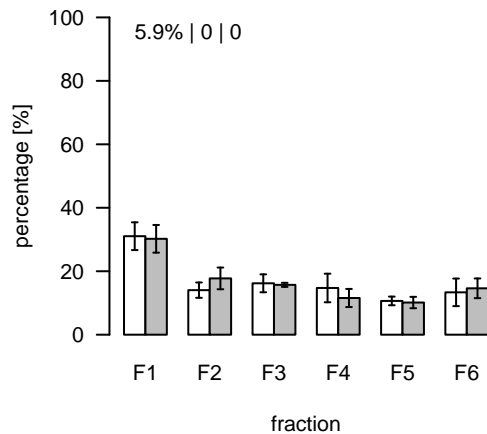

**L772 (m/z=850.542122; rt=5.35003)**  
T/S Cluster: L-5.4-1

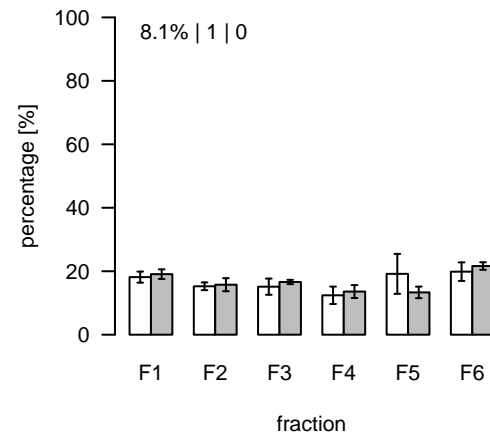

**L773 (m/z=806.545904; rt=5.36047)**  
T/S Cluster: L-5.4-2

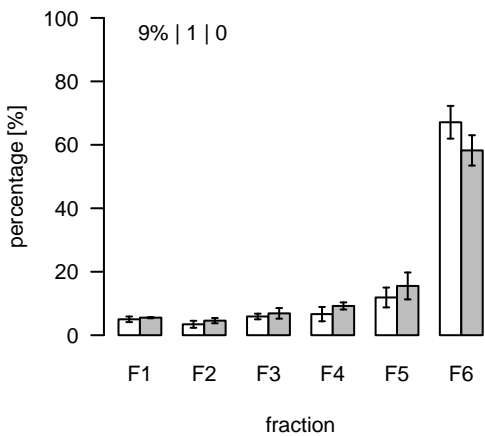

**L777 (m/z=811.500492; rt=5.36597)**  
T/S Cluster: L-5.4-2

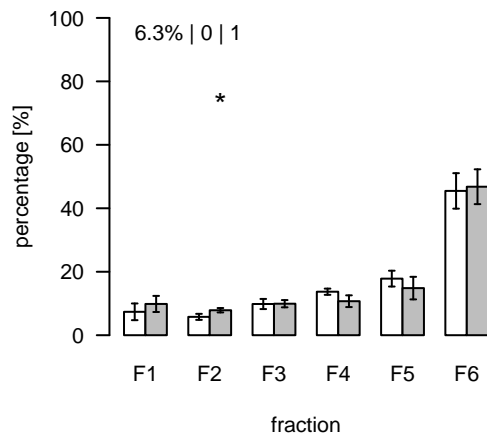

**L774 (m/z=807.549961; rt=5.36093)**  
T/S Cluster: L-5.4-2

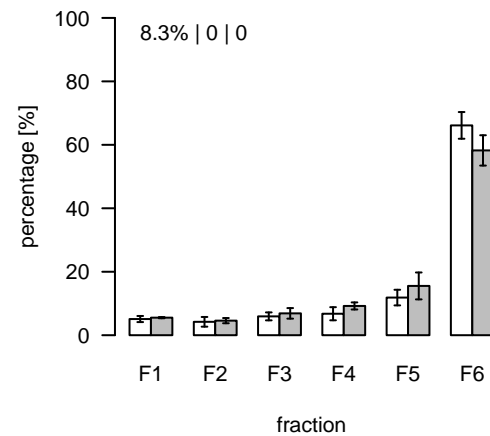

**L776 (m/z=806.508493; rt=5.36257)**  
T/S Cluster: L-5.4-2

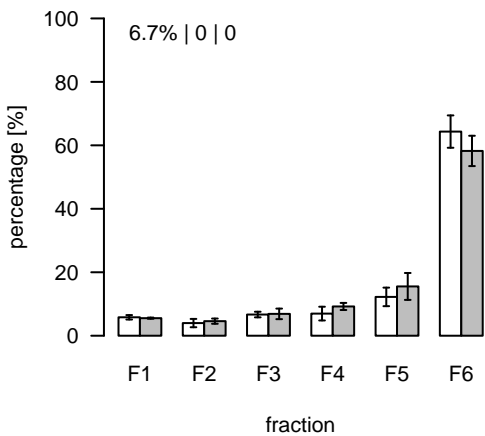

**L775 (m/z=807.518998; rt=5.36222)**  
T/S Cluster: L-5.4-2

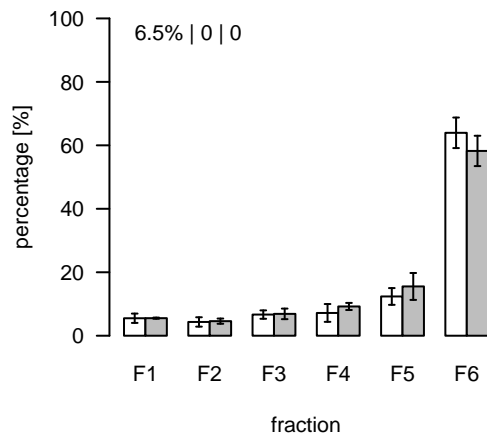

**L778 (m/z=409.272152; rt=5.39959)**  
T/S Cluster: L-5.4-3

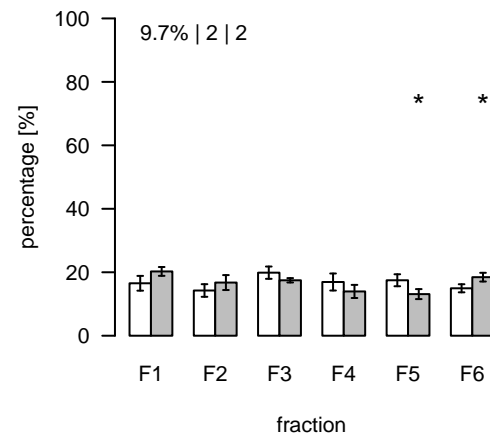

**L779 (m/z=416.375947; rt=5.39964)**  
T/S Cluster: L-5.4-4

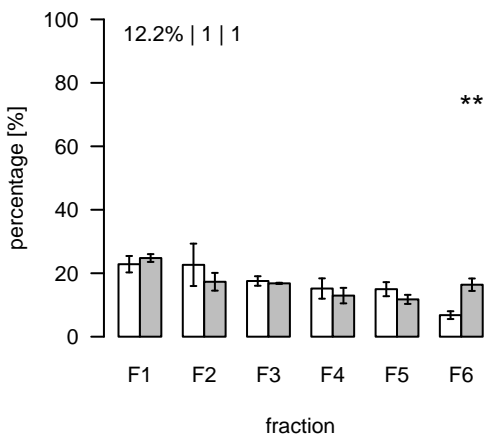

**L780 (m/z=416.369805; rt=5.39997)**  
T/S Cluster: L-5.4-4

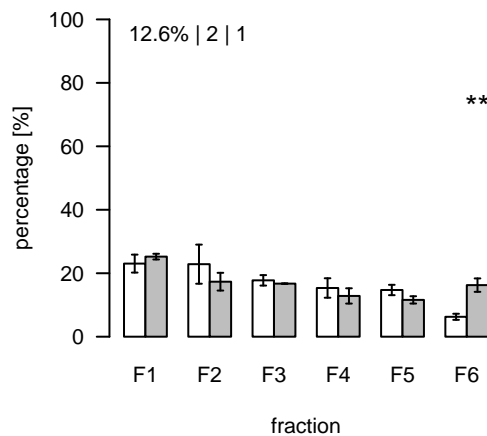

**L784 (m/z=790.564333; rt=5.43042)**  
T/S Cluster: L-5.4-5

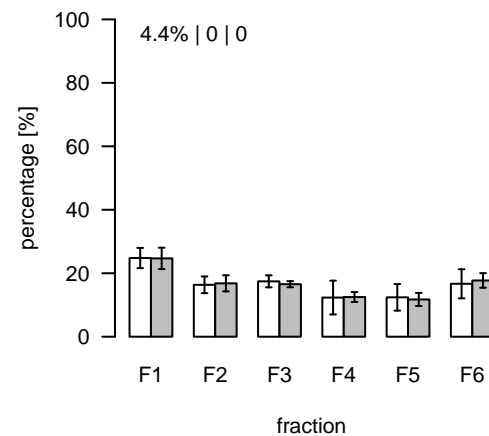

**L785 (m/z=790.547821; rt=5.43049)**  
T/S Cluster: L-5.4-5

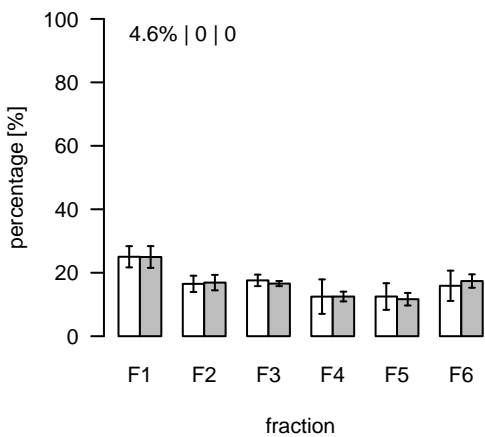

**L788 (m/z=788.547131; rt=5.43688)**  
T/S Cluster: L-5.4-5

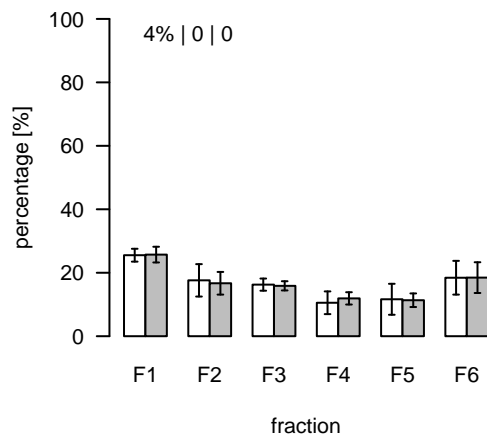

**L781 (m/z=791.571319; rt=5.42478)**  
T/S Cluster: L-5.4-5

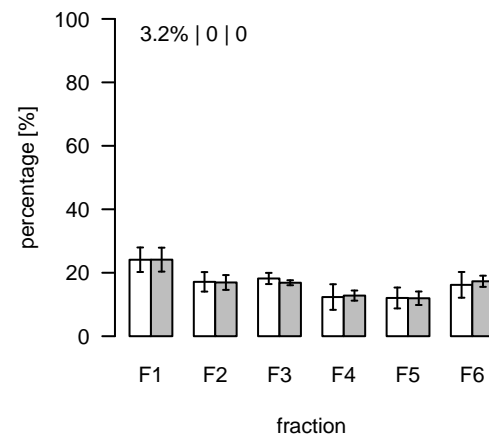

**L782 (m/z=791.549627; rt=5.42587)**  
T/S Cluster: L-5.4-5

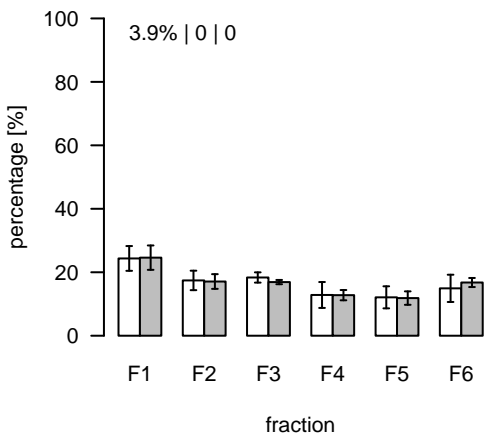

**L790 (m/z=789.551303; rt=5.43732)**  
T/S Cluster: L-5.4-5

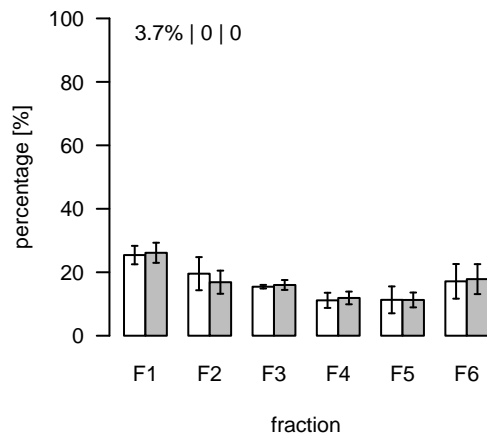

**L783 (m/z=792.543519; rt=5.4293)**  
T/S Cluster: L-5.4-6

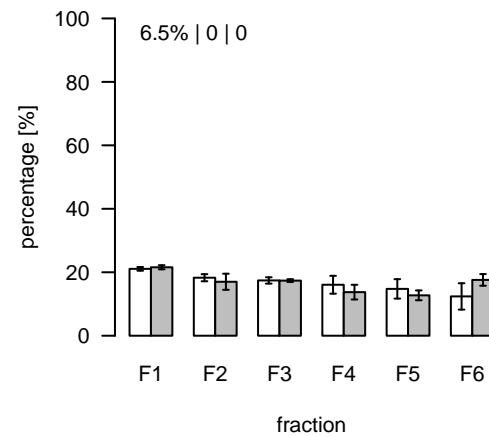

**L786 (m/z=792.5734; rt=5.43054)**  
T/S Cluster: L-5.4-7

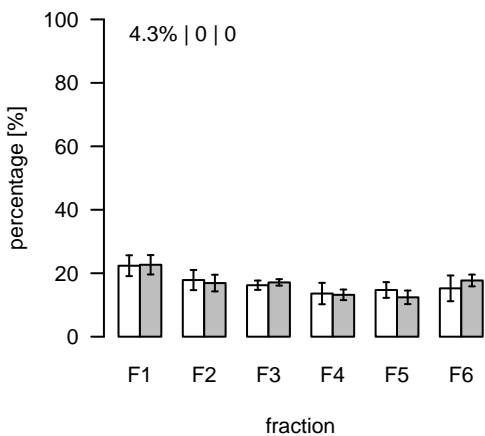

**L787 (m/z=395.282455; rt=5.43301)**  
T/S Cluster: L-5.4-8

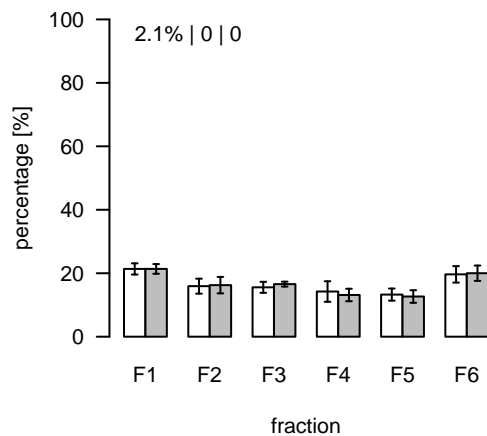

**L789 (m/z=394.274074; rt=5.4369)**  
T/S Cluster: L-5.4-9

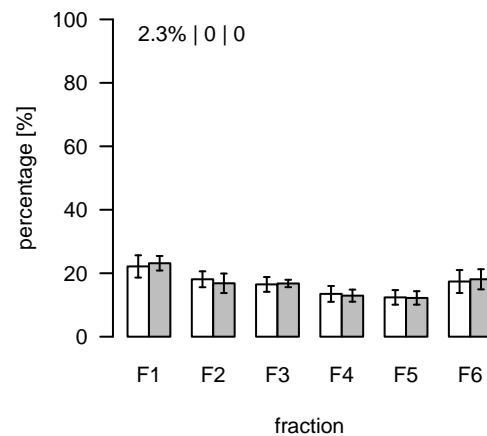

**L793 (m/z=622.447608; rt=5.48569)**  
T/S Cluster: L-5.5-1

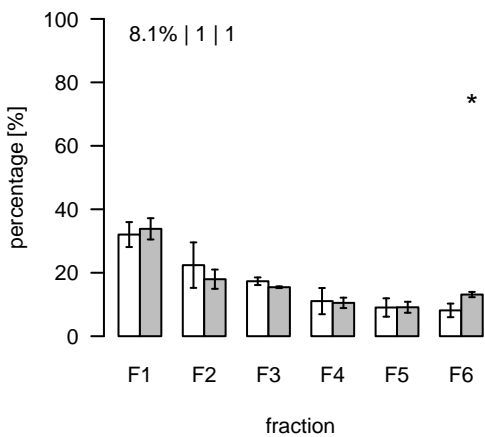

**L801 (m/z=788.547006; rt=5.53665)**  
T/S Cluster: L-5.5-1

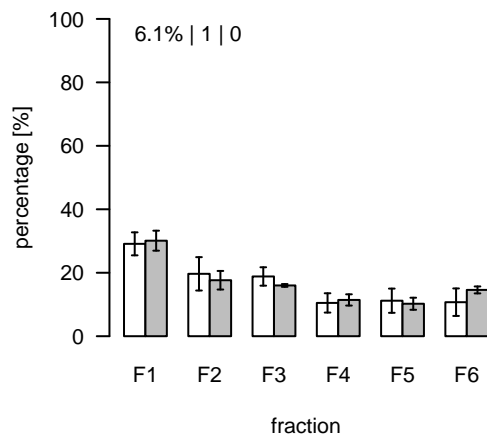

**L792 (m/z=622.432026; rt=5.48551)**  
T/S Cluster: L-5.5-1

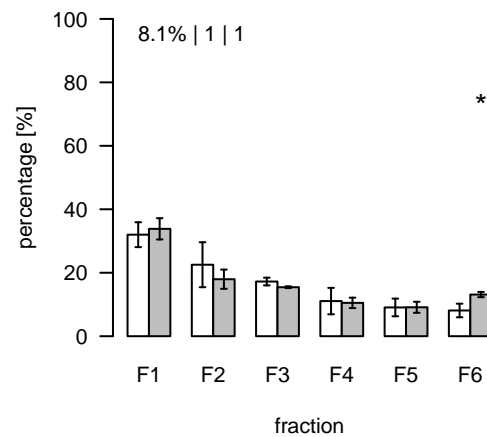

**L791 (m/z=623.450422; rt=5.48526)**  
T/S Cluster: L-5.5-1

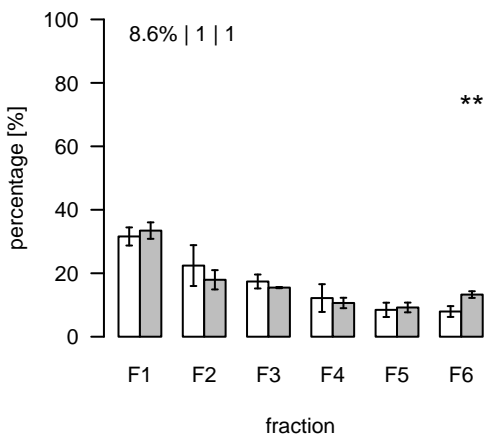

**L800 (m/z=789.55097; rt=5.53585)**  
T/S Cluster: L-5.5-1

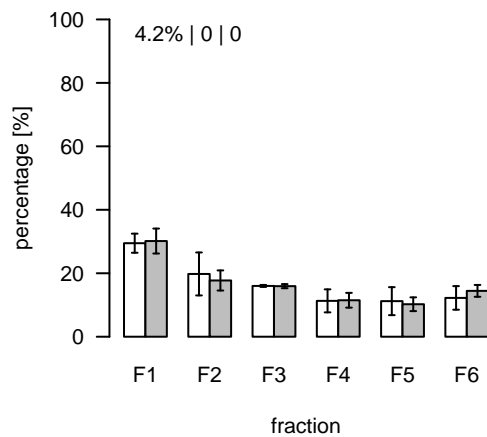

**L797 (m/z=568.430111; rt=5.51248)**  
T/S Cluster: L-5.5-2

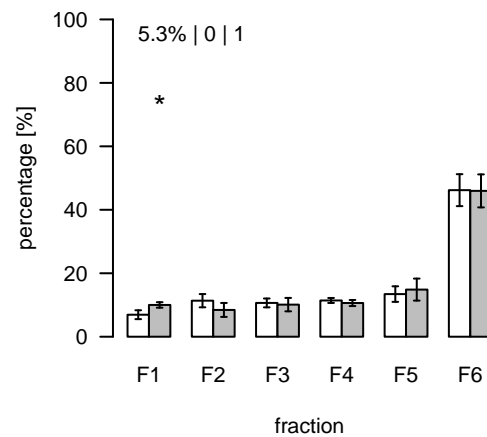

**L798 (m/z=568.416283; rt=5.51254)**  
T/S Cluster: L-5.5-2

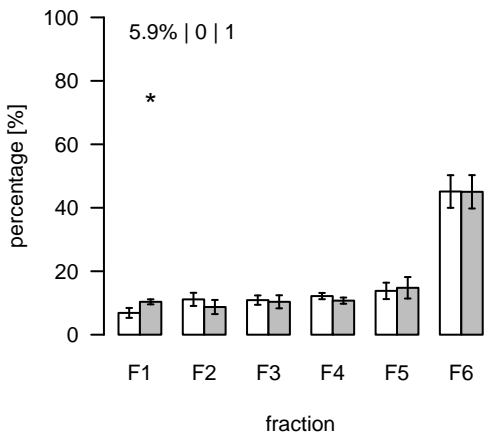

**L795 (m/z=551.427179; rt=5.51048)**  
T/S Cluster: L-5.5-2

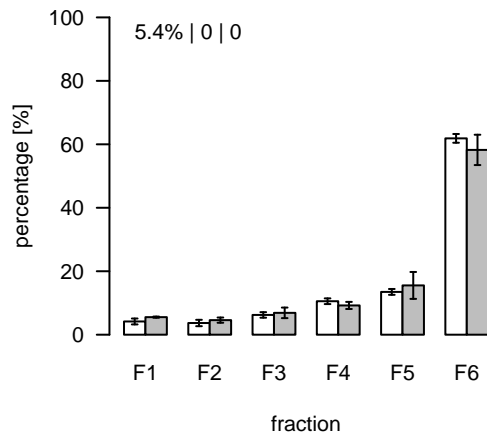

**L794 (m/z=551.414595; rt=5.51041)**  
T/S Cluster: L-5.5-2

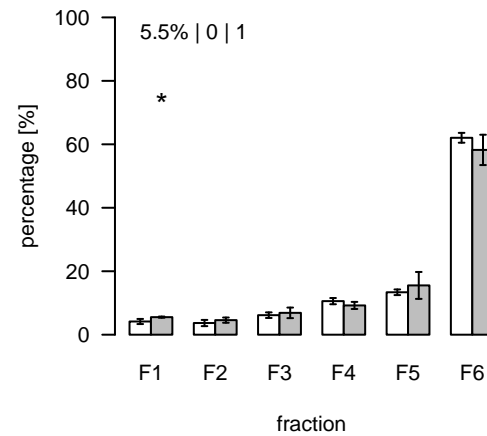

**L796 (m/z=569.434411; rt=5.51201)**  
T/S Cluster: L-5.5-2

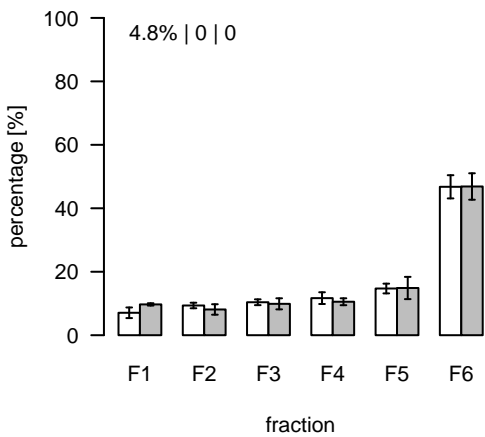

**L799 (m/z=779.545878; rt=5.52822)**  
T/S Cluster: L-5.5-3

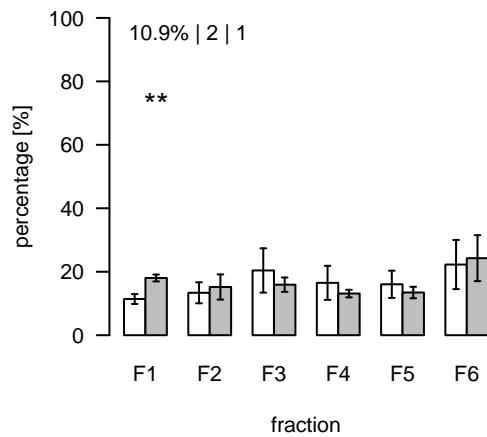

**L802 (m/z=394.27397; rt=5.53707)**  
T/S Cluster: L-5.5-4

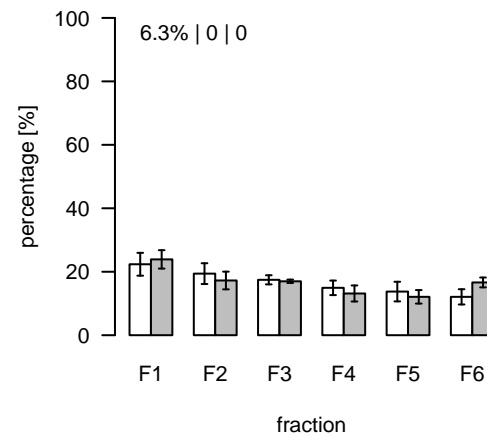

**L803 (m/z=763.605779; rt=5.55204)**  
T/S Cluster: L-5.6-1

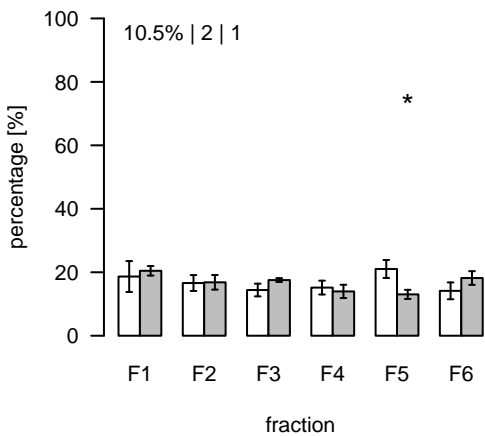

**L804 (m/z=832.555743; rt=5.55402)**  
T/S Cluster: L-5.6-2

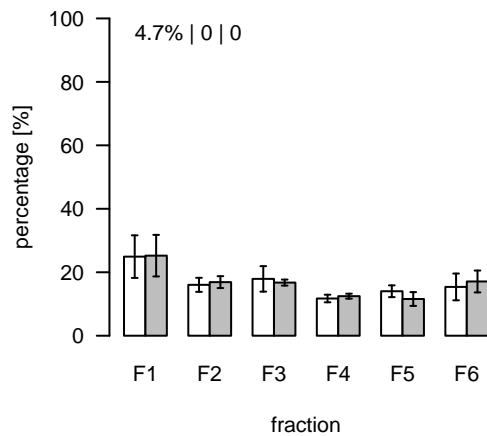

**L805 (m/z=832.527223; rt=5.55428)**  
T/S Cluster: L-5.6-3

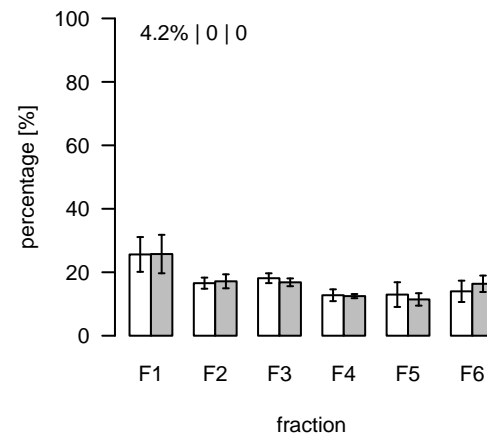



**L806 (m/z=832.526938; rt=5.55439)**  
T/S Cluster: L-5.6-3

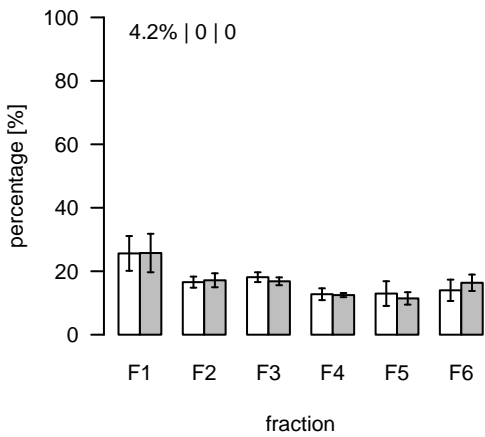

**L807 (m/z=816.57842; rt=5.56445)**  
T/S Cluster: L-5.6-4

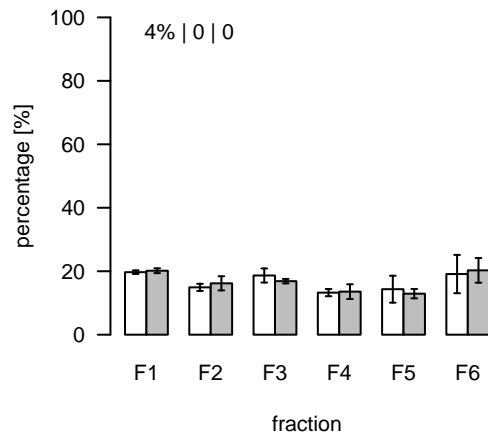

**L808 (m/z=816.578311; rt=5.56572)**  
T/S Cluster: L-5.6-4

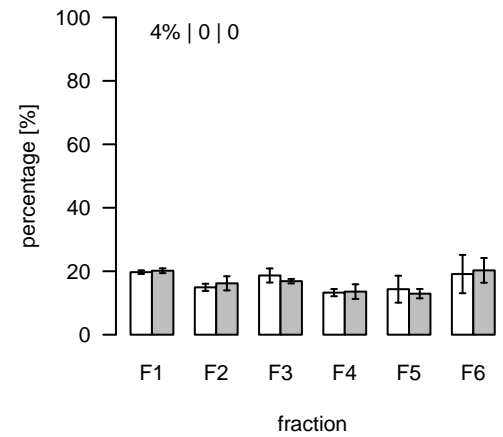

**L809 (m/z=817.581916; rt=5.56789)**  
T/S Cluster: L-5.6-5

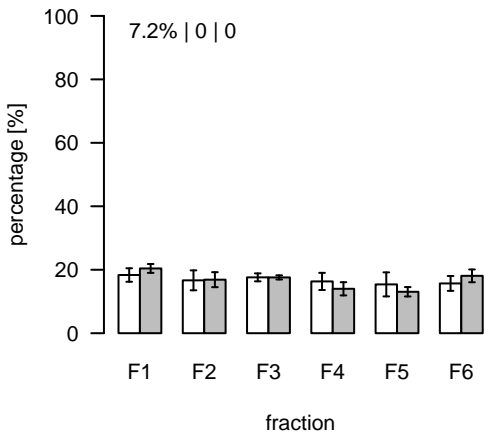

**L811 (m/z=844.537851; rt=5.57775)**  
T/S Cluster: L-5.6-6

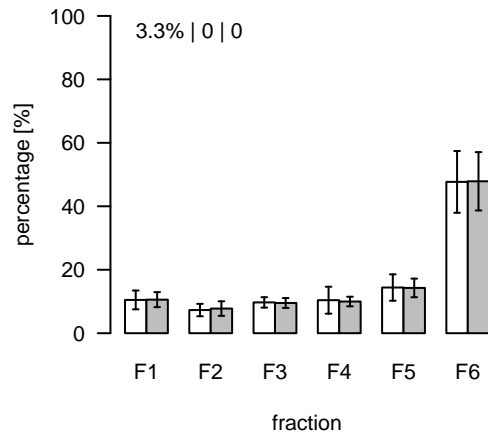

**L810 (m/z=844.510247; rt=5.57713)**  
T/S Cluster: L-5.6-6

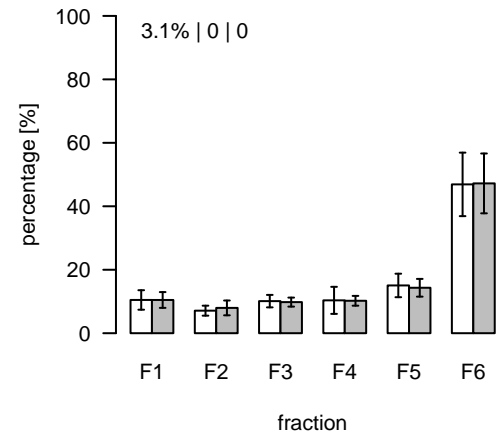

**L812 (m/z=844.523004; rt=5.63053)**  
T/S Cluster: L-5.6-6

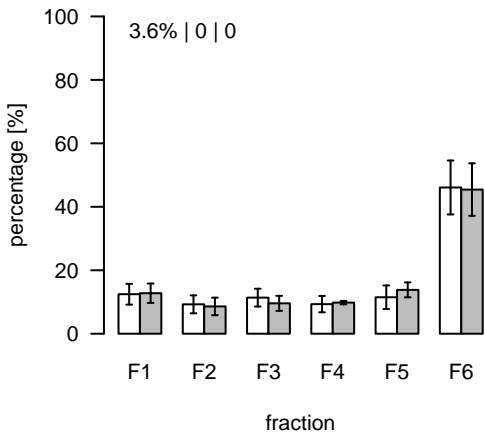

**L813 (m/z=783.566403; rt=5.63107)**  
T/S Cluster: L-5.6-7

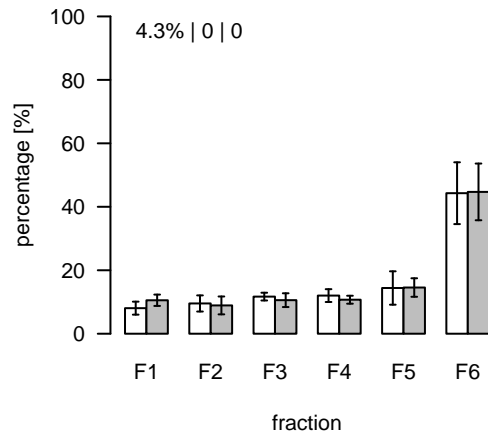

**L814 (m/z=826.539343; rt=5.6412)**  
T/S Cluster: L-5.6-8

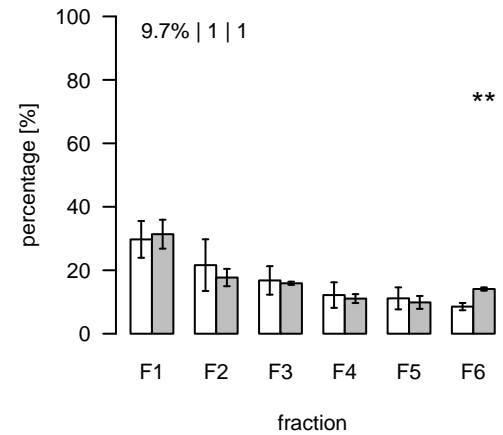

**L840 (m/z=948.630195; rt=5.70365)**  
T/S Cluster: L-5.7-1

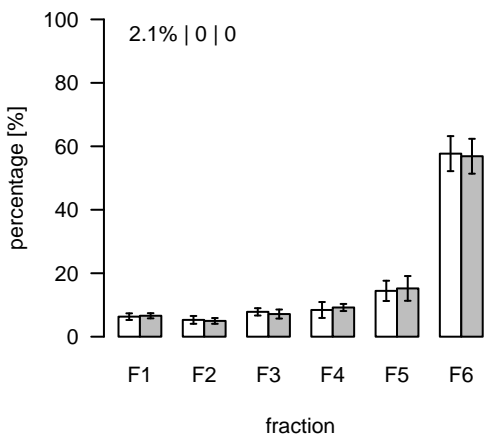

**L836 (m/z=949.63381; rt=5.70335)**  
T/S Cluster: L-5.7-1

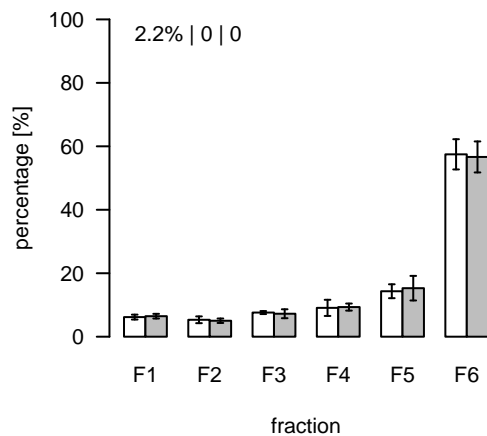

**L832 (m/z=949.669696; rt=5.70309)**  
T/S Cluster: L-5.7-1

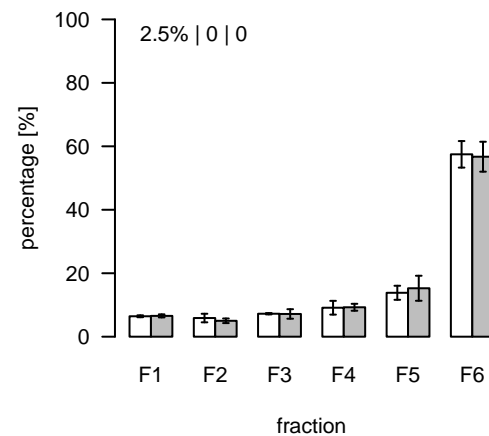

**L854 (m/z=946.620335; rt=5.71383)**  
T/S Cluster: L-5.7-1

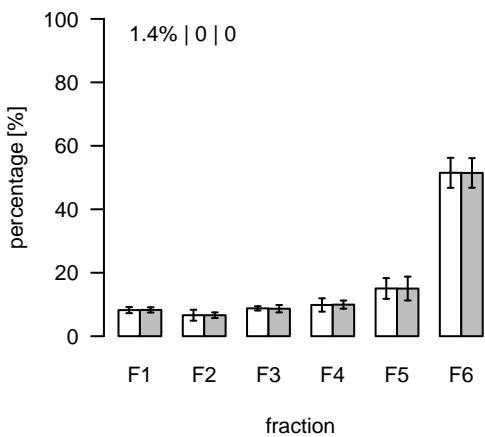

**L831 (m/z=948.685324; rt=5.70067)**  
T/S Cluster: L-5.7-1

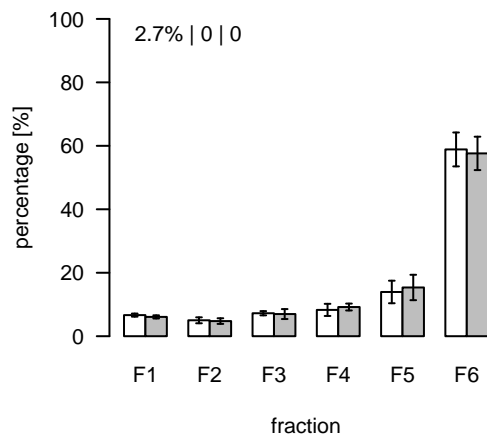

**L855 (m/z=946.587557; rt=5.71392)**  
T/S Cluster: L-5.7-1

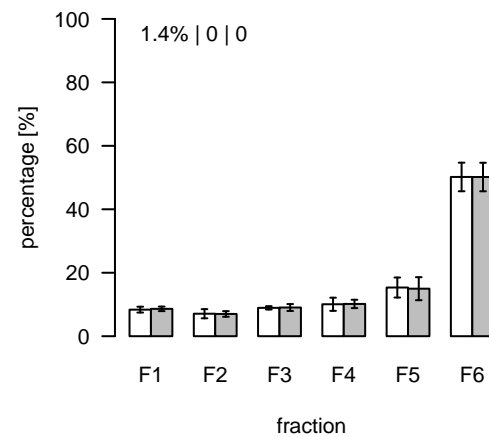

**L818 (m/z=856.528616; rt=5.66113)**  
T/S Cluster: L-5.7-1

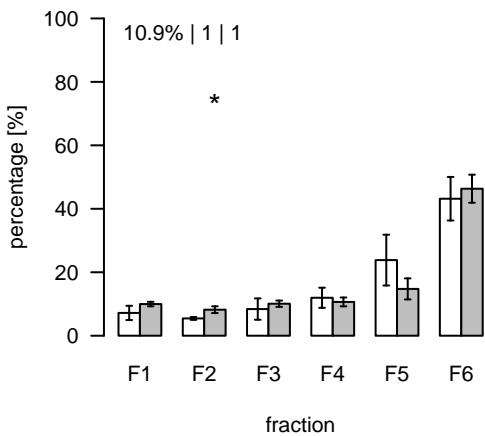

**L841 (m/z=948.569298; rt=5.70383)**  
T/S Cluster: L-5.7-1

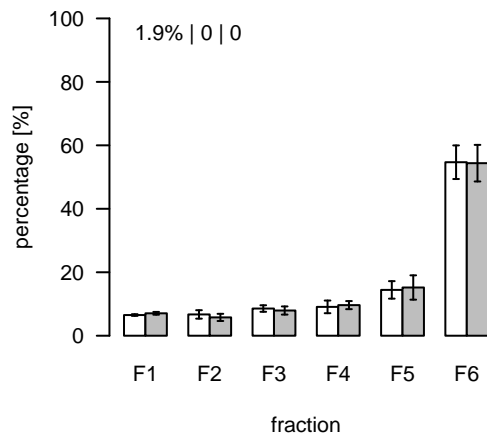

**L853 (m/z=947.619145; rt=5.71381)**  
T/S Cluster: L-5.7-1

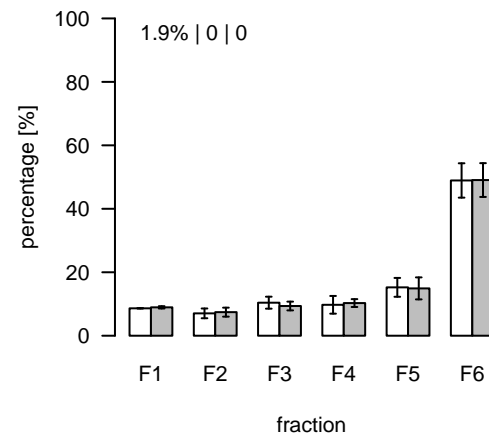

**L817 (m/z=856.495816; rt=5.66095)**  
T/S Cluster: L-5.7-1

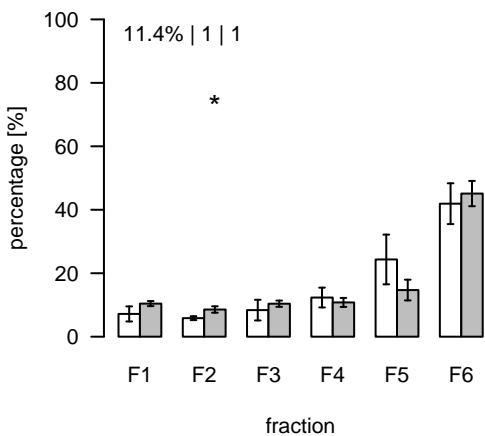

**L834 (m/z=950.63684; rt=5.70318)**  
T/S Cluster: L-5.7-1

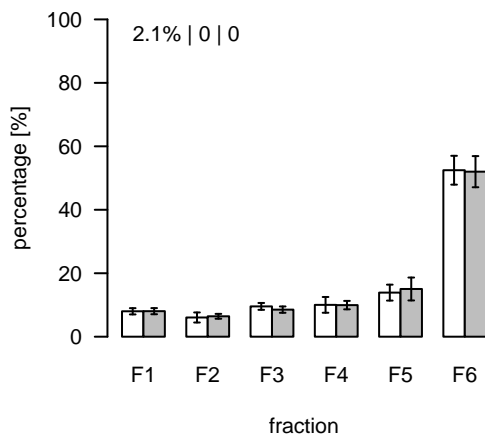

**L835 (m/z=950.618069; rt=5.70319)**  
T/S Cluster: L-5.7-1

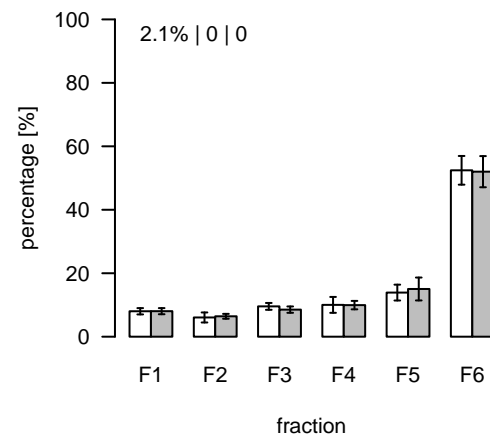

**L816 (m/z=857.534247; rt=5.66078)**  
T/S Cluster: L-5.7-1

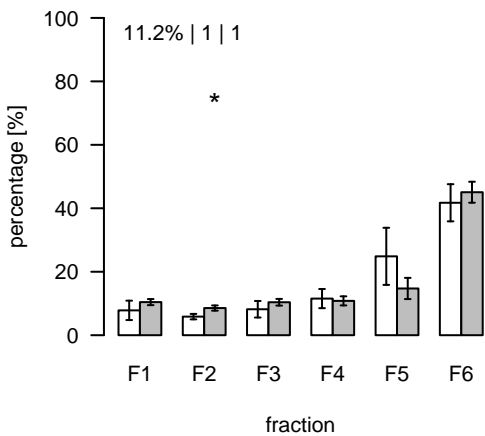

**L815 (m/z=857.508789; rt=5.66057)**  
T/S Cluster: L-5.7-1

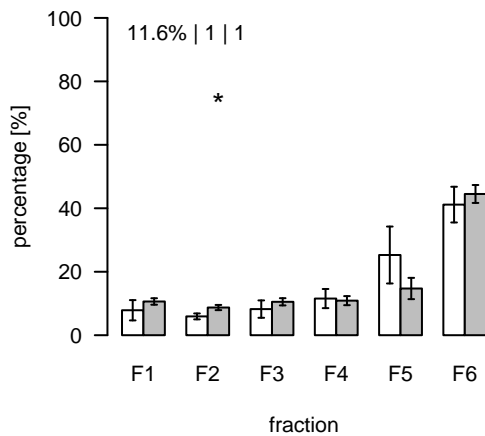

**L819 (m/z=784.560889; rt=5.67003)**  
T/S Cluster: L-5.7-1

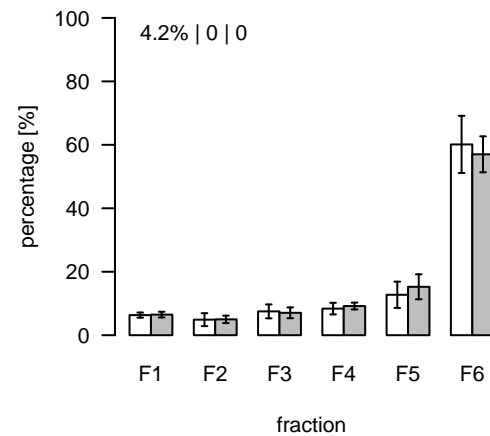

**L838 (m/z=474.316668; rt=5.70357)**  
T/S Cluster: L-5.7-1

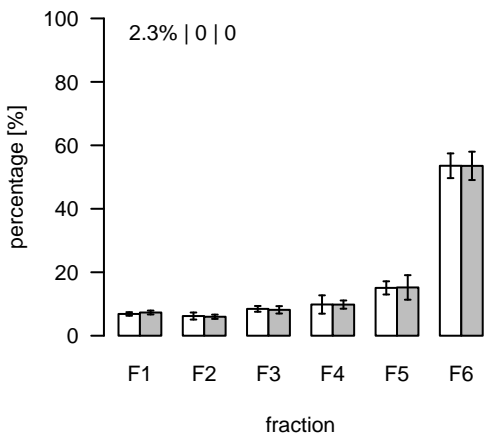

**L856 (m/z=947.570531; rt=5.7143)**  
T/S Cluster: L-5.7-1

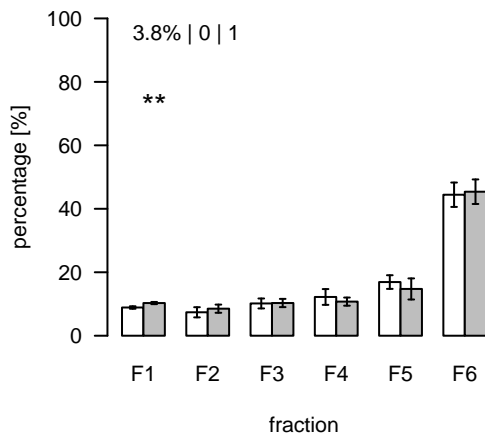

**L820 (m/z=790.565291; rt=5.67597)**  
T/S Cluster: L-5.7-2

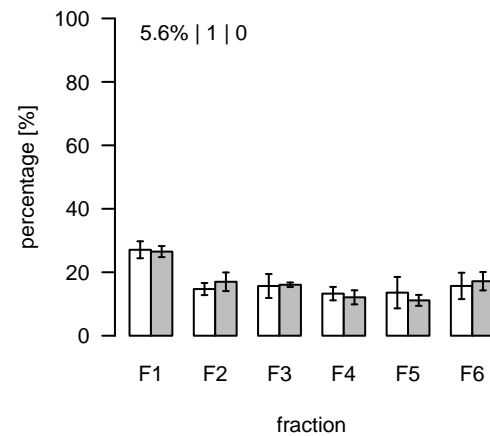

**L821 (m/z=398.277662; rt=5.69143)**  
T/S Cluster: L-5.7-3

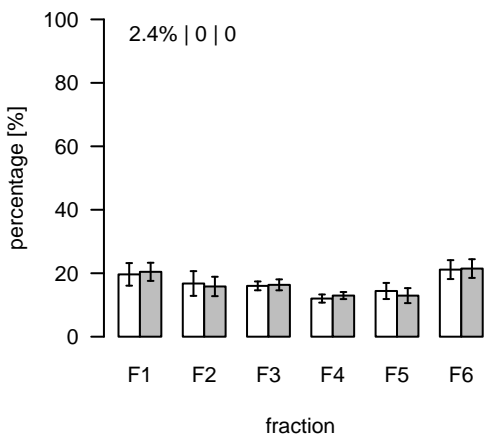

**L867 (m/z=772.551749; rt=5.71646)**  
T/S Cluster: L-5.7-4

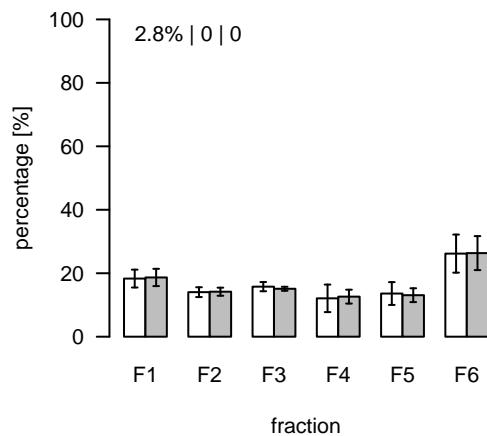

**L864 (m/z=773.555596; rt=5.71621)**  
T/S Cluster: L-5.7-4

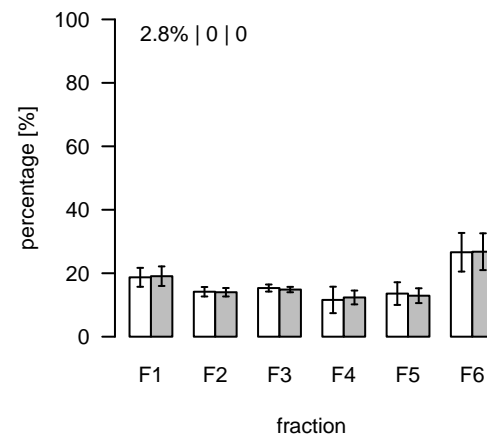

**L845 (m/z=798.568785; rt=5.71052)**  
T/S Cluster: L-5.7-4

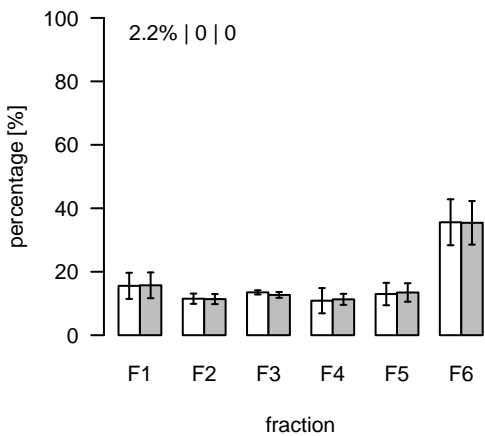

**L844 (m/z=798.548924; rt=5.71036)**  
T/S Cluster: L-5.7-4

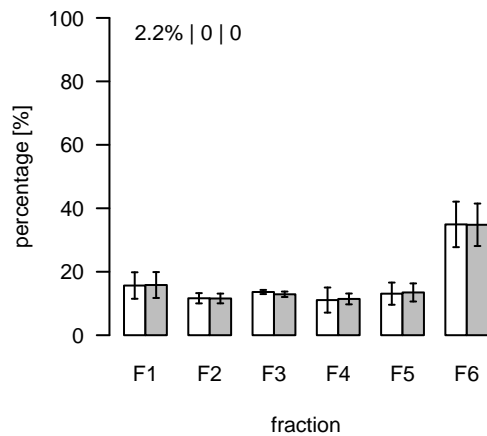

**L825 (m/z=796.555315; rt=5.69251)**  
T/S Cluster: L-5.7-4

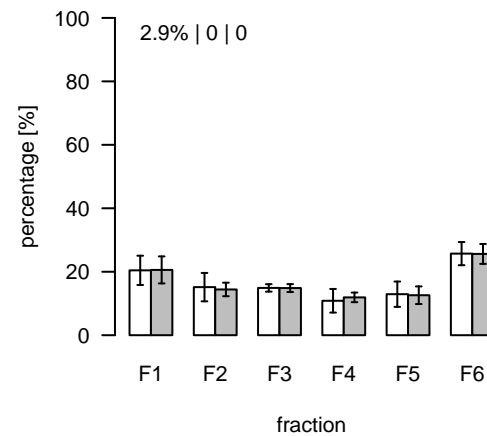

**L847 (m/z=799.57596; rt=5.71132)**  
T/S Cluster: L-5.7-4

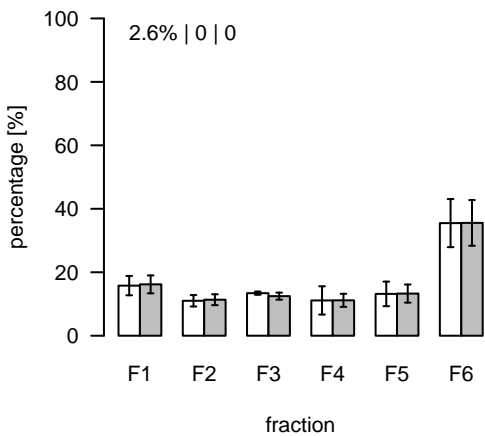

**L846 (m/z=799.553841; rt=5.71124)**  
T/S Cluster: L-5.7-4

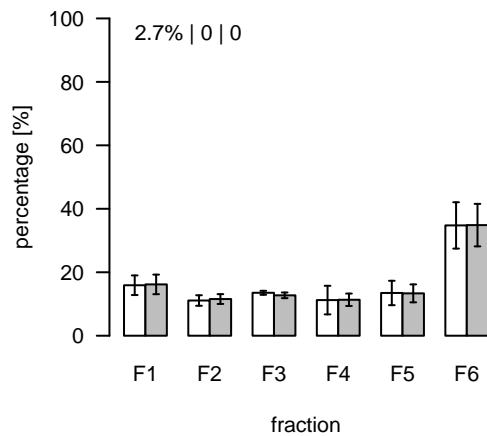

**L823 (m/z=796.530808; rt=5.69237)**  
T/S Cluster: L-5.7-4

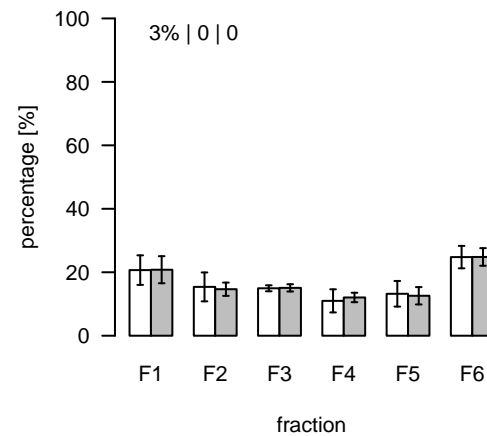

**L865 (m/z=773.514015; rt=5.71634)**  
T/S Cluster: L-5.7-4

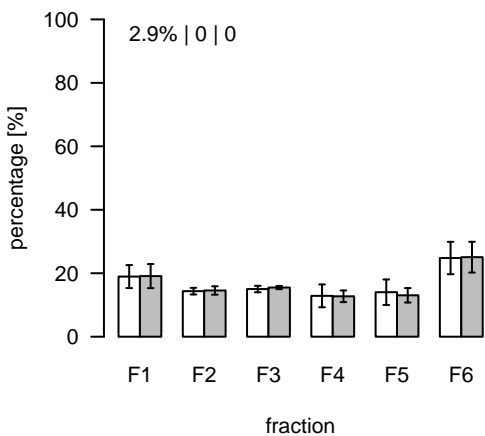

**L866 (m/z=386.275389; rt=5.71643)**  
T/S Cluster: L-5.7-4

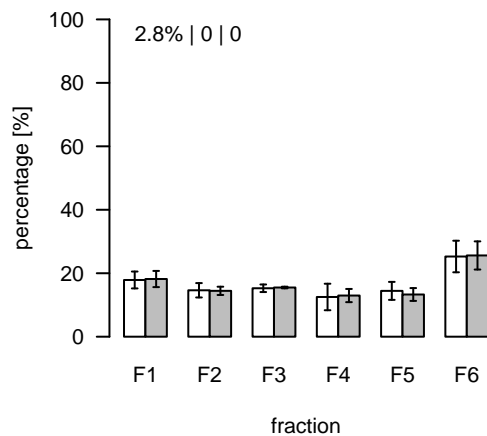

**L861 (m/z=774.558863; rt=5.71565)**  
T/S Cluster: L-5.7-4

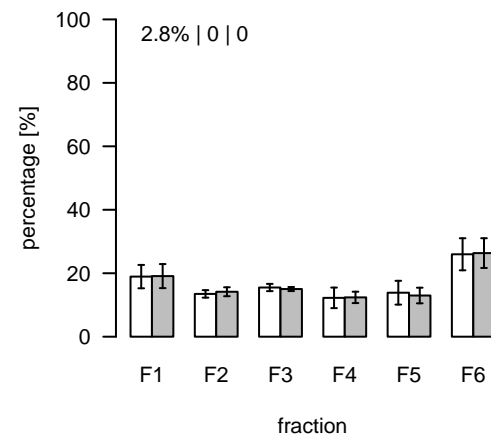

**L862 (m/z=774.558077; rt=5.71566)**  
T/S Cluster: L-5.7-4

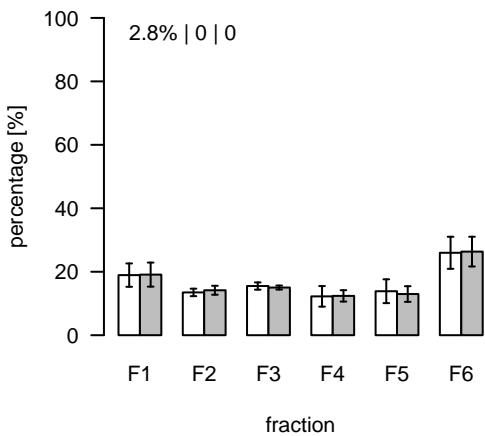

**L868 (m/z=386.281583; rt=5.71648)**  
T/S Cluster: L-5.7-4

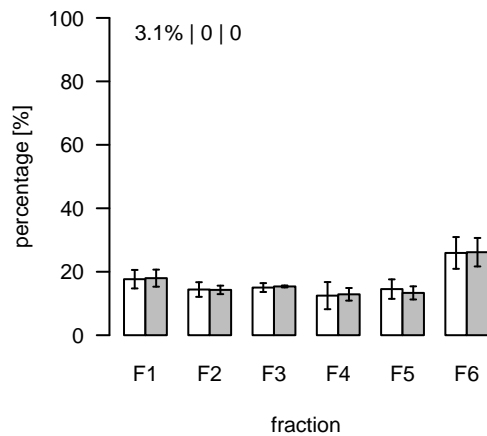

**L824 (m/z=797.558037; rt=5.69244)**  
T/S Cluster: L-5.7-4

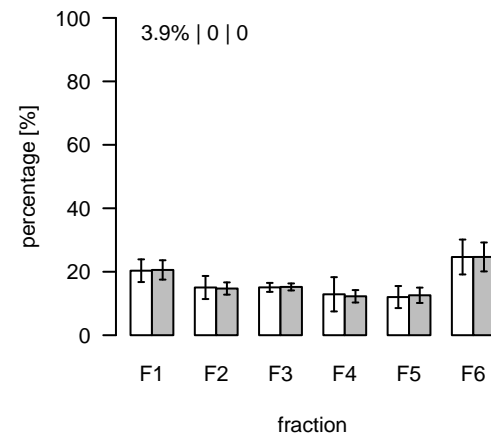

**L822 (m/z=797.531906; rt=5.69226)**  
T/S Cluster: L-5.7-4

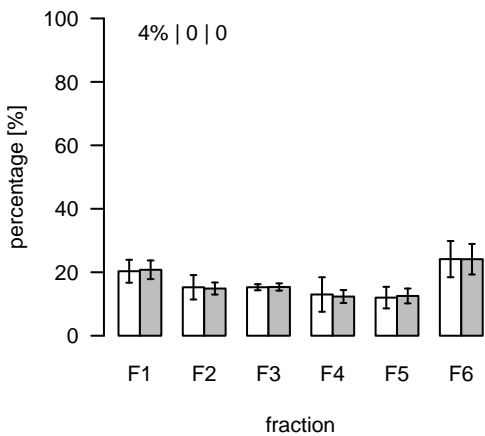

**L879 (m/z=773.60994; rt=5.72455)**  
T/S Cluster: L-5.7-4

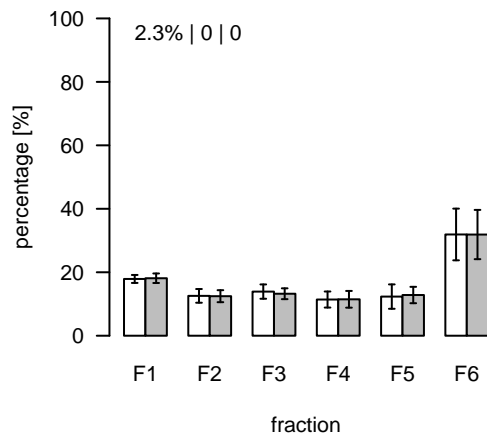

**L863 (m/z=386.778878; rt=5.71578)**  
T/S Cluster: L-5.7-4

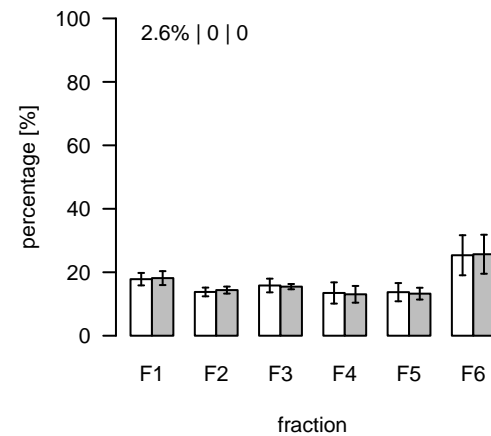

**L842 (m/z=800.57578; rt=5.70818)**  
T/S Cluster: L-5.7-4

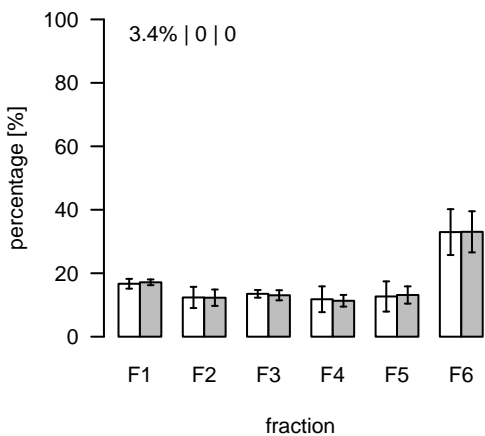

**L859 (m/z=257.521284; rt=5.71476)**  
T/S Cluster: L-5.7-4

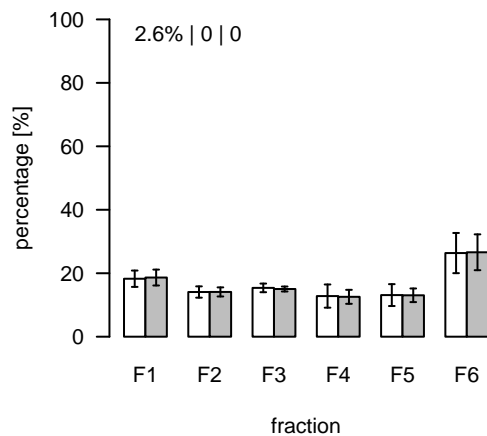

**L849 (m/z=399.282495; rt=5.71177)**  
T/S Cluster: L-5.7-4

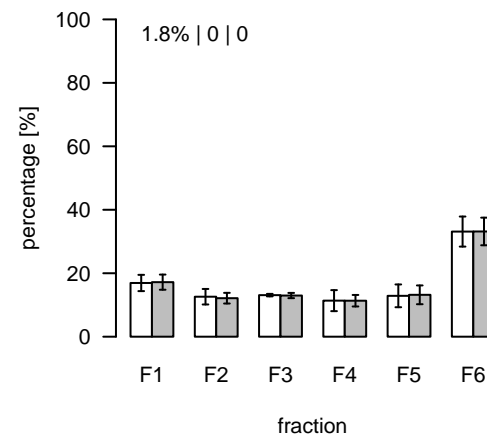

**L848 (m/z=399.28909; rt=5.71169)**  
T/S Cluster: L-5.7-4

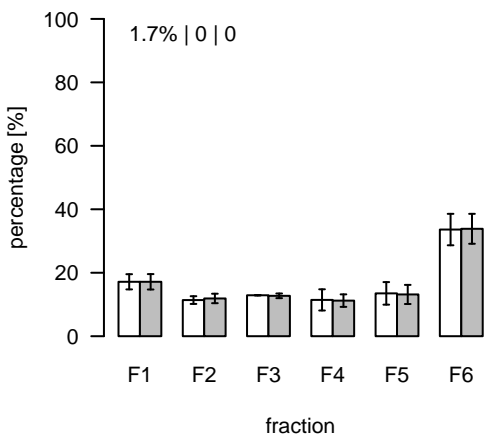

**L860 (m/z=386.771384; rt=5.7148)**  
T/S Cluster: L-5.7-4

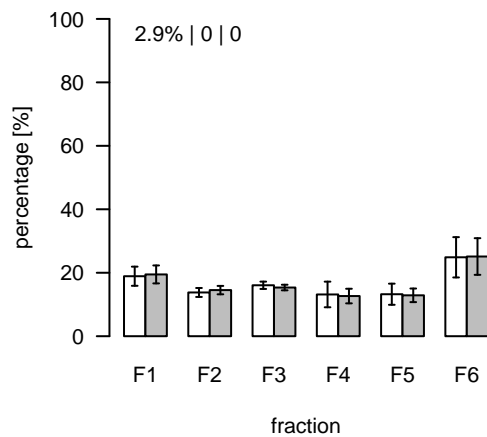

**L826 (m/z=416.369798; rt=5.69493)**  
T/S Cluster: L-5.7-5

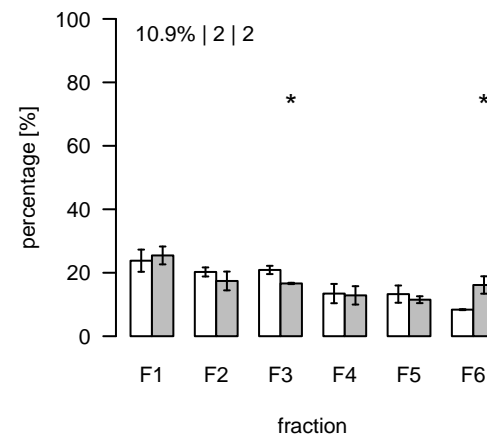

**L829 (m/z=416.376182; rt=5.69754)**  
T/S Cluster: L-5.7-5

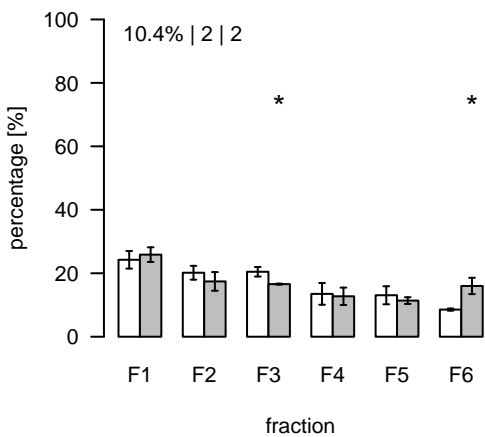

**L827 (m/z=790.526894; rt=5.69689)**  
T/S Cluster: L-5.7-6

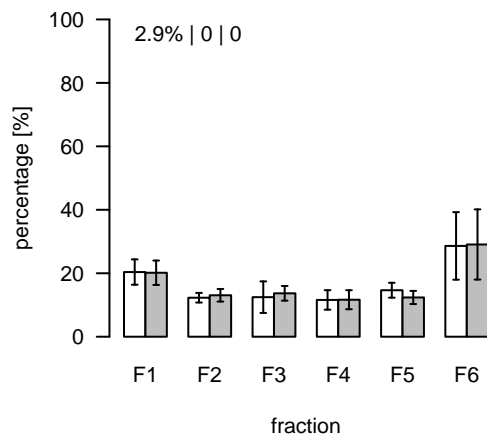

**L874 (m/z=770.538266; rt=5.72204)**  
T/S Cluster: L-5.7-7

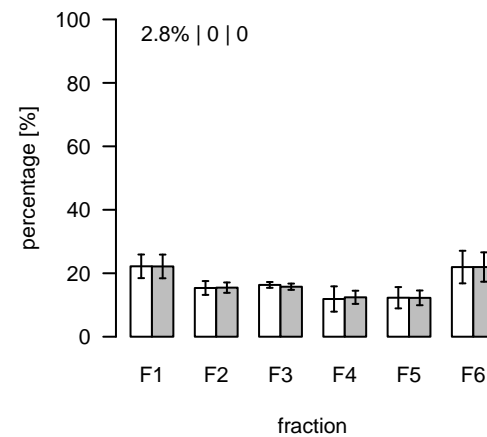

**L875 (m/z=770.511522; rt=5.72213)**  
T/S Cluster: L-5.7-7

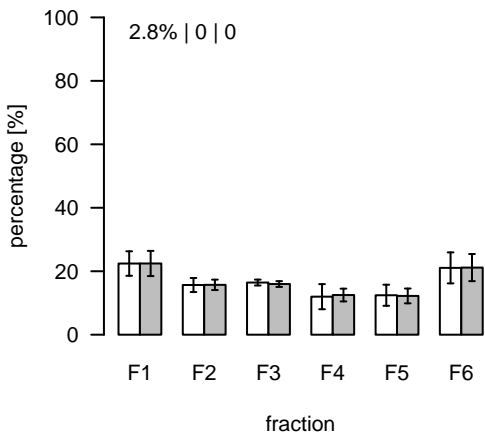

**L877 (m/z=771.542687; rt=5.72224)**  
T/S Cluster: L-5.7-7

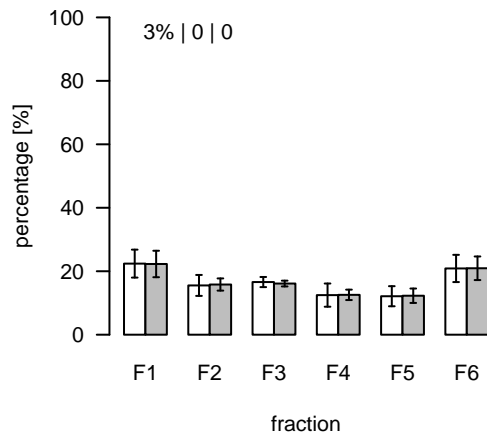

**L878 (m/z=771.519222; rt=5.7223)**  
T/S Cluster: L-5.7-7

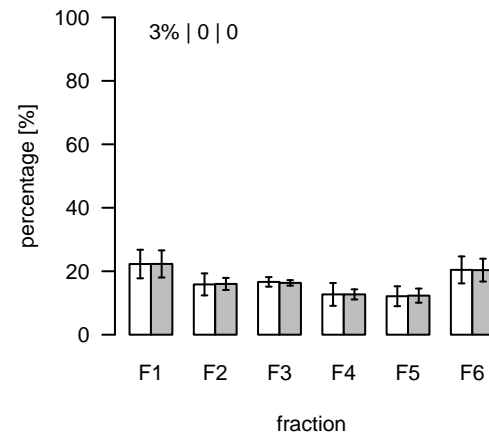

**L837 (m/z=814.564099; rt=5.70351)**  
T/S Cluster: L-5.7-7

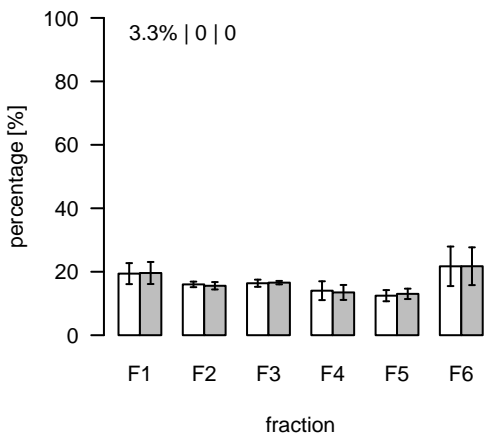

**L872 (m/z=814.548387; rt=5.72185)**  
T/S Cluster: L-5.7-7

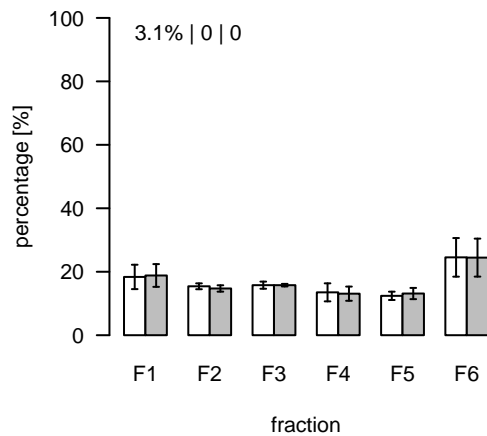

**L873 (m/z=385.272385; rt=5.722)**  
T/S Cluster: L-5.7-7

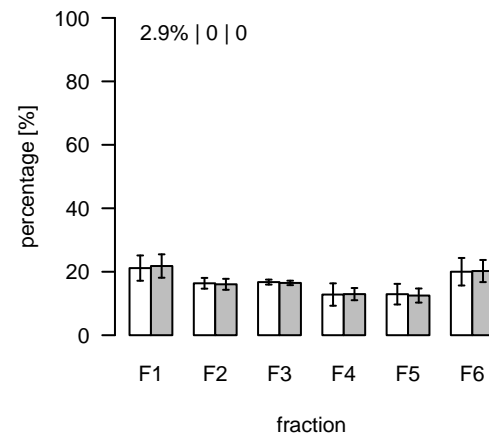

**L876 (m/z=385.266793; rt=5.7222)**  
T/S Cluster: L-5.7-7

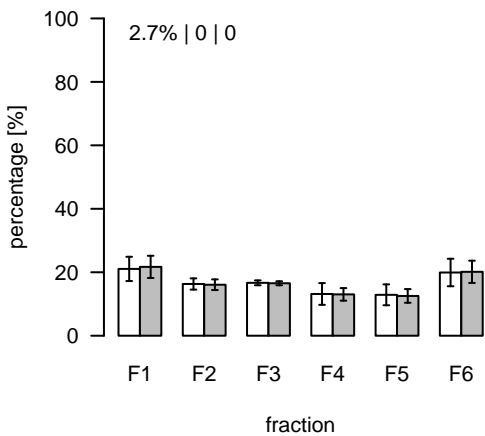

**L869 (m/z=815.54897; rt=5.71649)**  
T/S Cluster: L-5.7-7

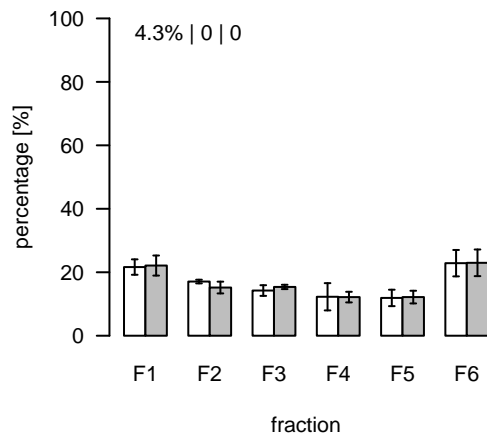

**L828 (m/z=815.576556; rt=5.69693)**  
T/S Cluster: L-5.7-7

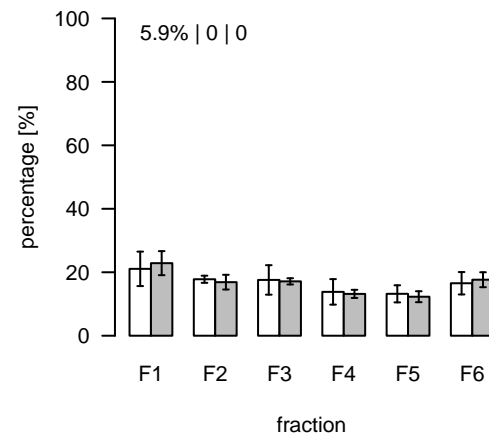

**L880 (m/z=772.615273; rt=5.73264)**  
T/S Cluster: L-5.7-8

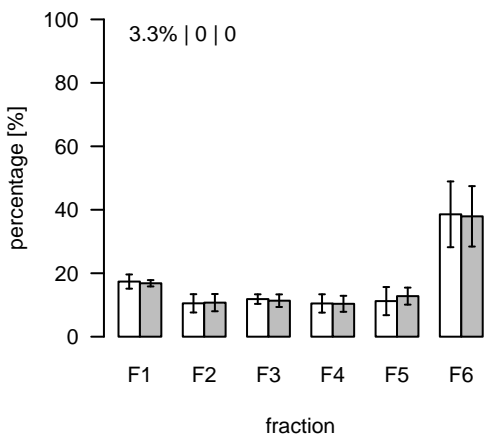

**L830 (m/z=816.644151; rt=5.70063)**  
T/S Cluster: L-5.7-8

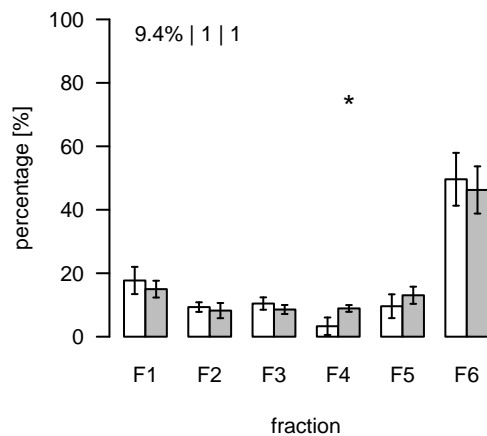

**L839 (m/z=953.585726; rt=5.70359)**  
T/S Cluster: L-5.7-9

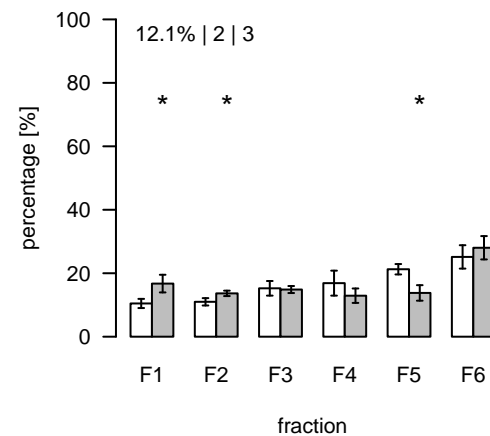

**L833 (m/z=953.635954; rt=5.70317)**  
T/S Cluster: L-5.7-9

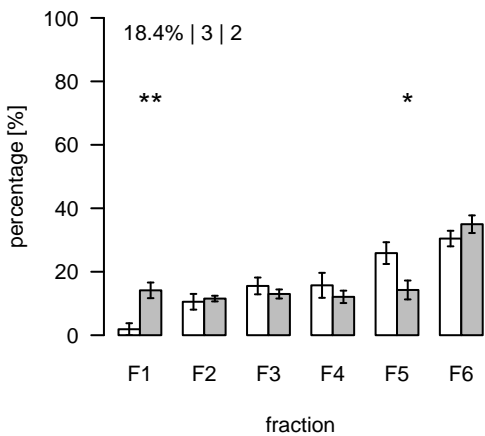

**L843 (m/z=800.550725; rt=5.7092)**  
T/S Cluster: L-5.7-10

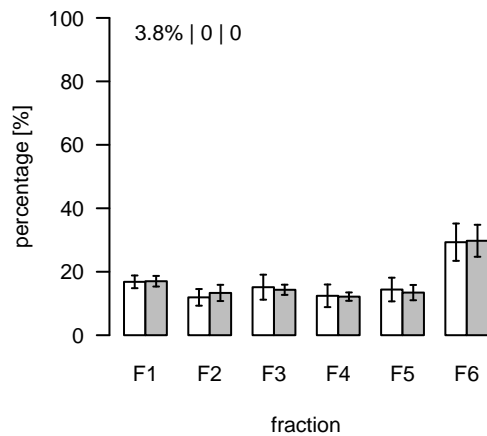

**L850 (m/z=388.34341; rt=5.71303)**  
T/S Cluster: L-5.7-11

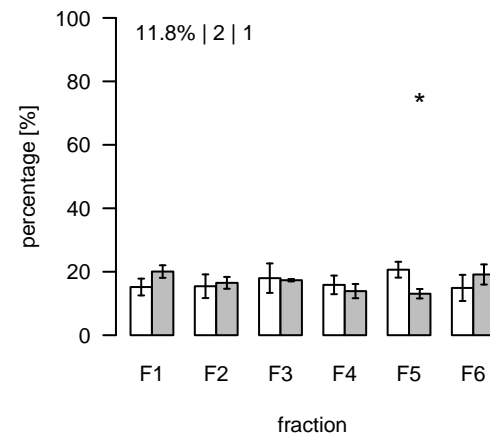

**L852 (m/z=388.335179; rt=5.7135)**  
T/S Cluster: L-5.7-11

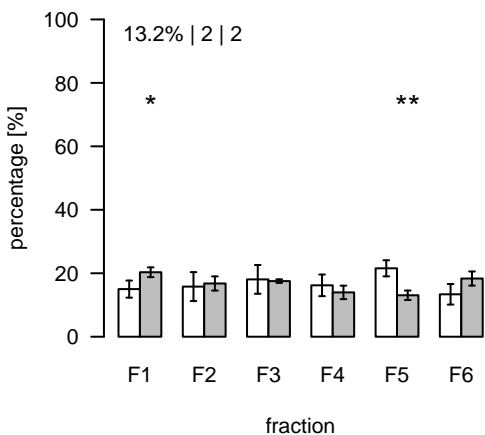

**L851 (m/z=389.34674; rt=5.71319)**  
T/S Cluster: L-5.7-11

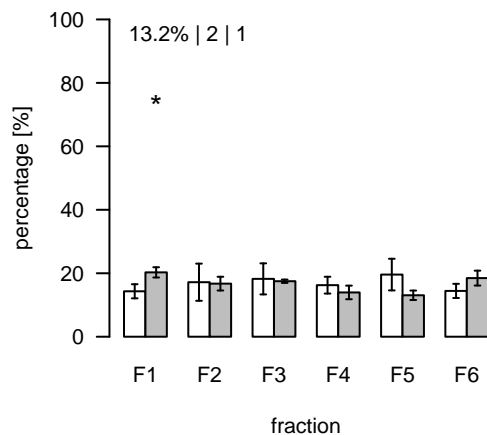

**L857 (m/z=371.317694; rt=5.71444)**  
T/S Cluster: L-5.7-12

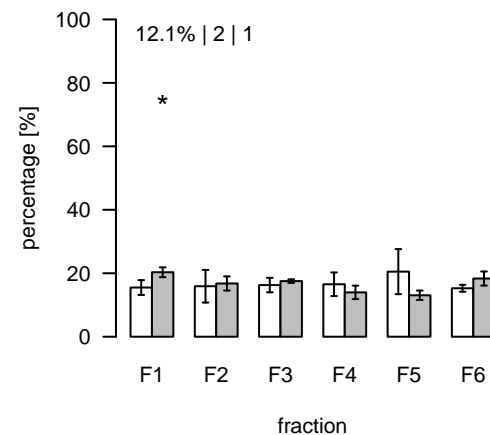



**L858 (m/z=371.312064; rt=5.71453)**  
T/S Cluster: L-5.7-12

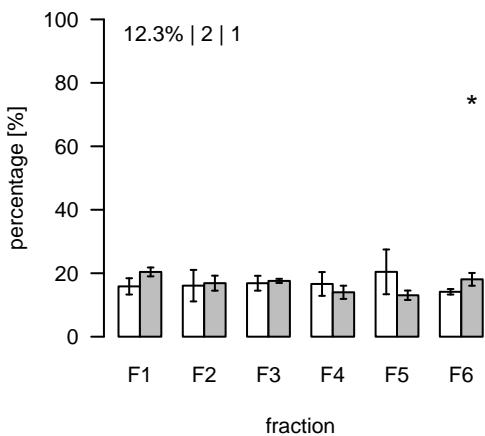

**L870 (m/z=393.299471; rt=5.71804)**  
T/S Cluster: L-5.7-13

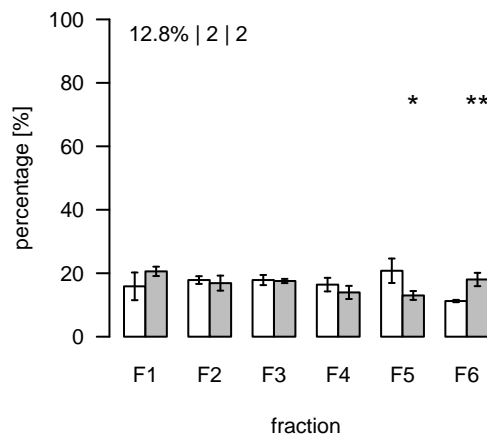

**L871 (m/z=393.29258; rt=5.71864)**  
T/S Cluster: L-5.7-13

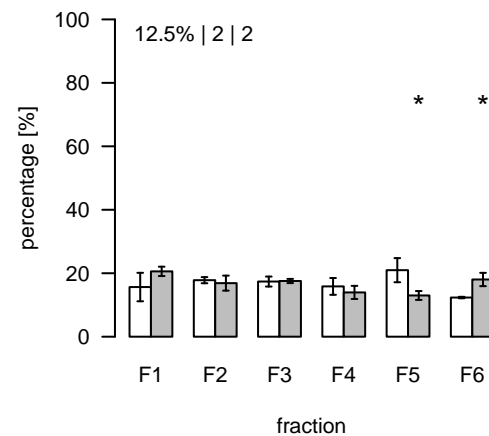

**L881 (m/z=789.5178; rt=5.73359)**  
T/S Cluster: L-5.7-14

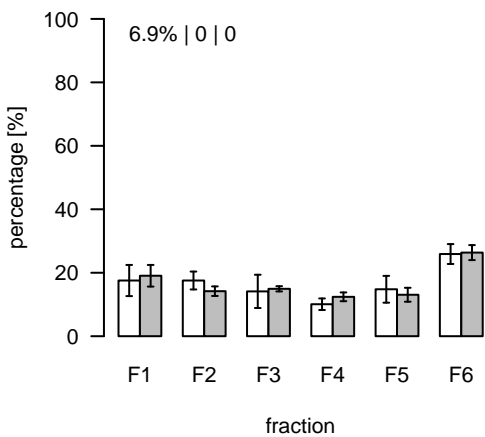

**L882 (m/z=789.531233; rt=5.74776)**  
T/S Cluster: L-5.7-15

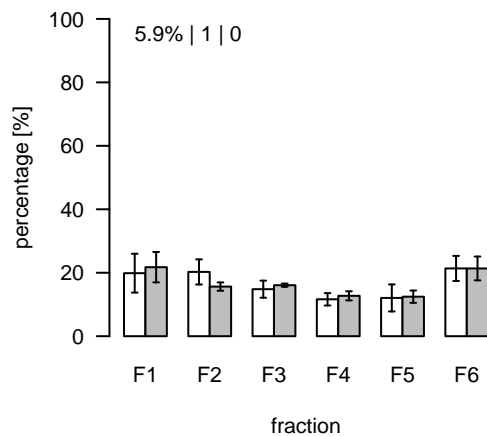

**L884 (m/z=788.550771; rt=5.75677)**  
T/S Cluster: L-5.8-1

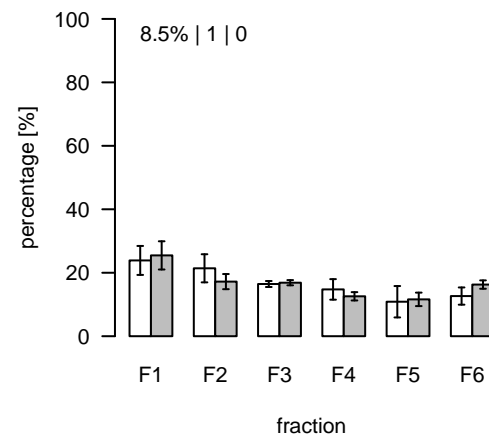

**L883 (m/z=788.524109; rt=5.75341)**  
T/S Cluster: L-5.8-1

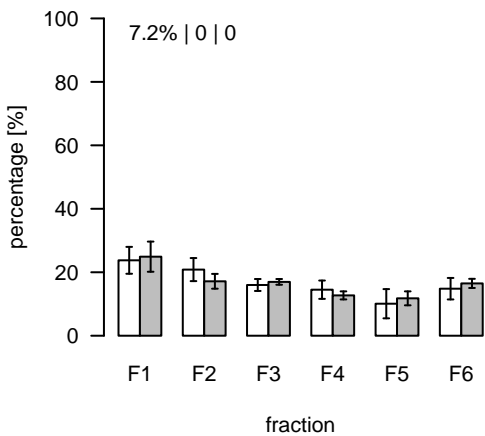

**L885 (m/z=789.553753; rt=5.75745)**  
T/S Cluster: L-5.8-2

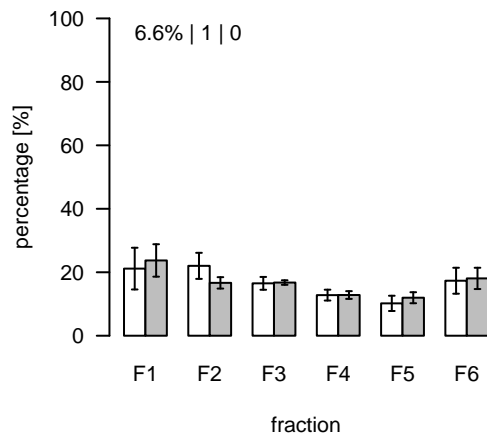

**L886 (m/z=808.560304; rt=5.83375)**  
T/S Cluster: L-5.8-3

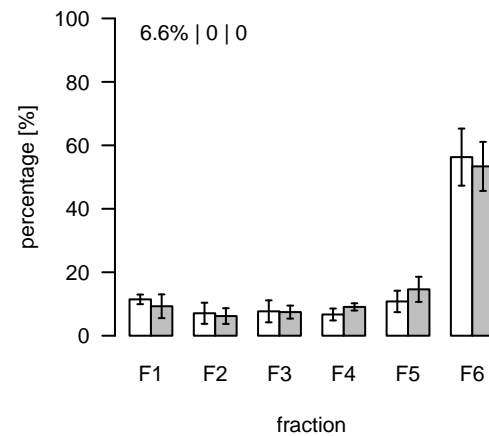

**L887 (m/z=809.562651; rt=5.83397)**  
T/S Cluster: L-5.8-3

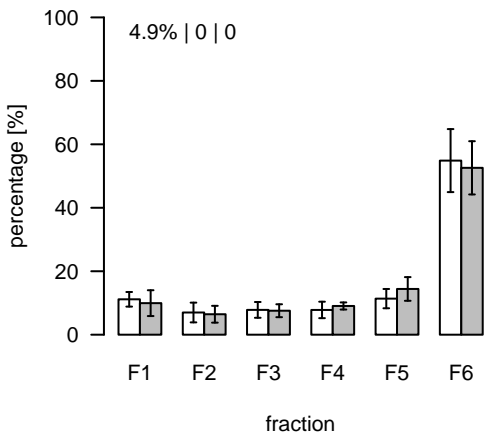

**L888 (m/z=771.542349; rt=5.83632)**  
T/S Cluster: L-5.8-4

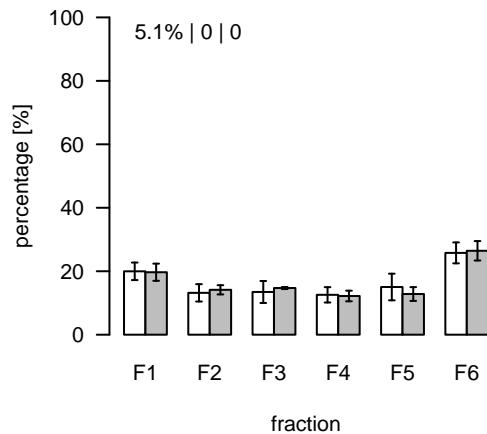

**L890 (m/z=771.519683; rt=5.83653)**  
T/S Cluster: L-5.8-4

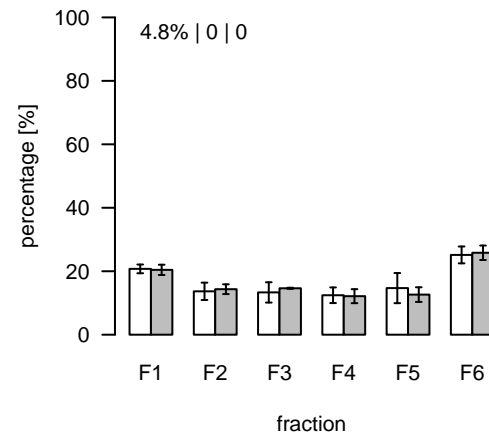

**L889 (m/z=770.537517; rt=5.83652)**  
T/S Cluster: L-5.8-5

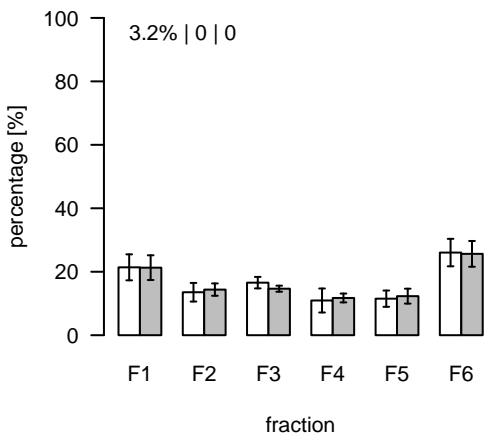

**L891 (m/z=770.512297; rt=5.83664)**  
T/S Cluster: L-5.8-5

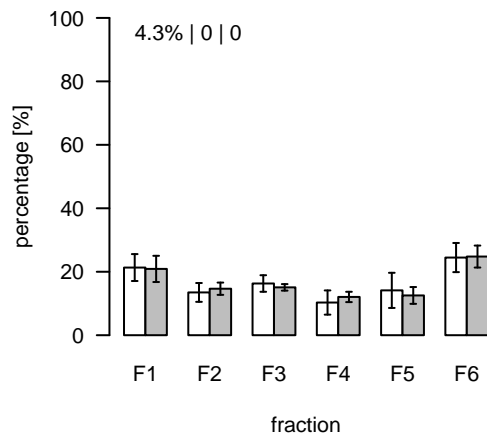

**L893 (m/z=797.557545; rt=5.87058)**  
T/S Cluster: L-5.9-1

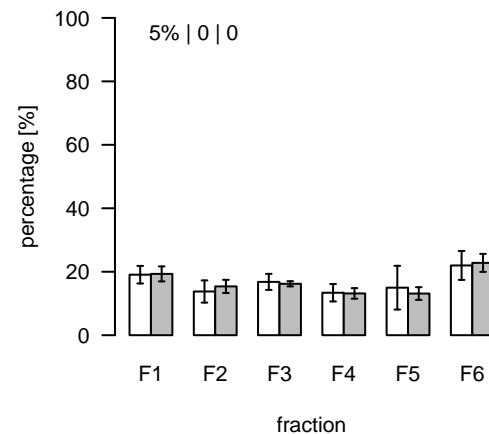

**L892 (m/z=797.532109; rt=5.86987)**  
T/S Cluster: L-5.9-1

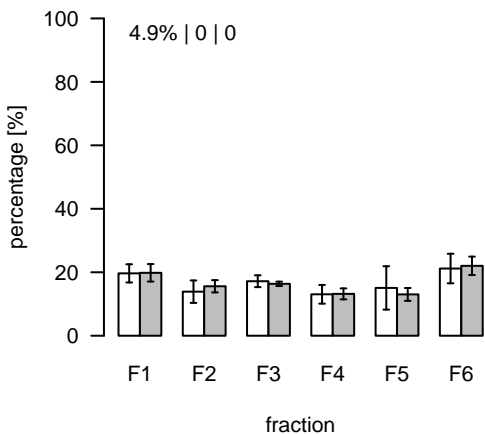

**L895 (m/z=796.554231; rt=5.8725)**  
T/S Cluster: L-5.9-2

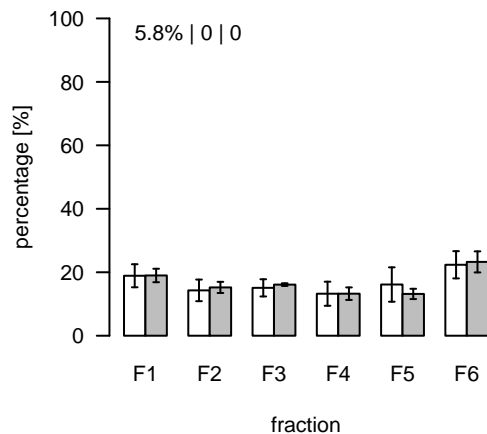

**L894 (m/z=796.530466; rt=5.87101)**  
T/S Cluster: L-5.9-2

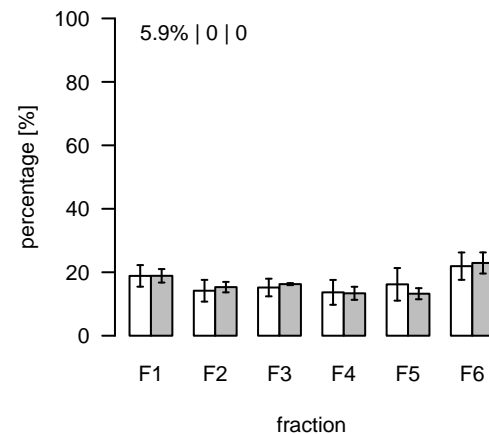

**L896 (m/z=808.527046; rt=5.87788)**  
T/S Cluster: L-5.9-3

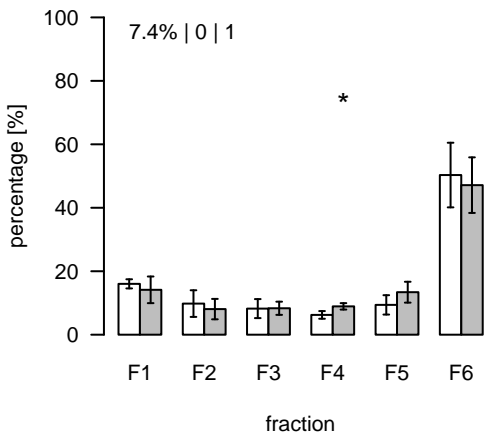

**L905 (m/z=926.588264; rt=5.93361)**  
T/S Cluster: L-5.9-4

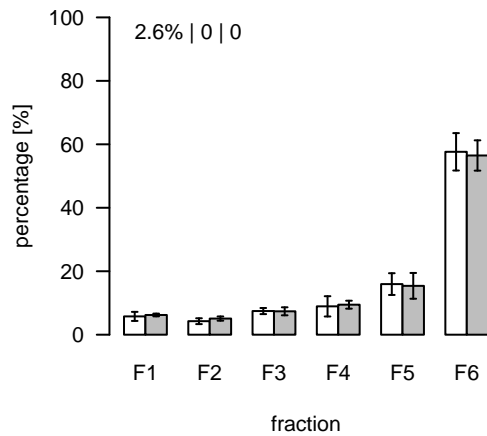

**L901 (m/z=927.592149; rt=5.93351)**  
T/S Cluster: L-5.9-4

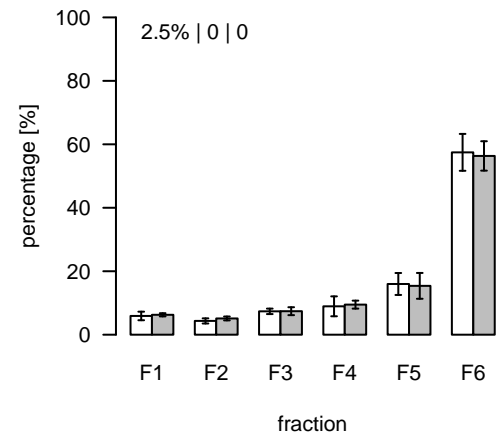

**L904 (m/z=928.596437; rt=5.93358)**  
T/S Cluster: L-5.9-4

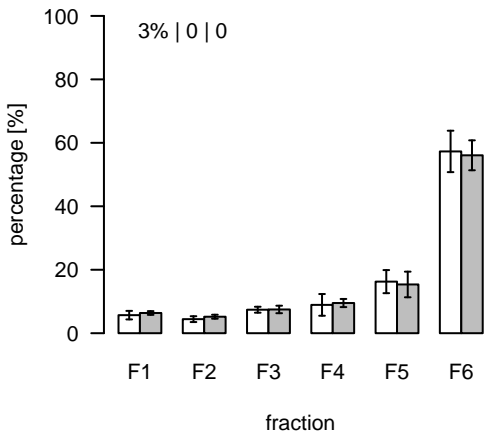

**L903 (m/z=927.530673; rt=5.93355)**  
T/S Cluster: L-5.9-4

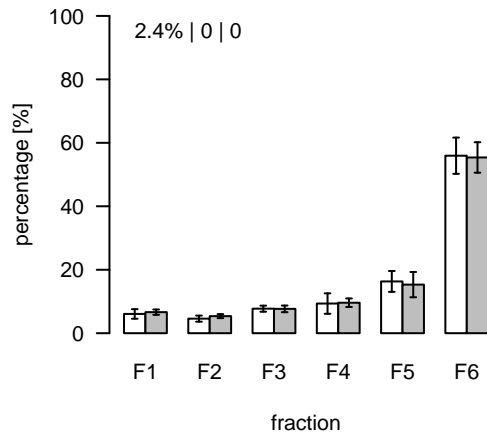

**L906 (m/z=463.295664; rt=5.93361)**  
T/S Cluster: L-5.9-4

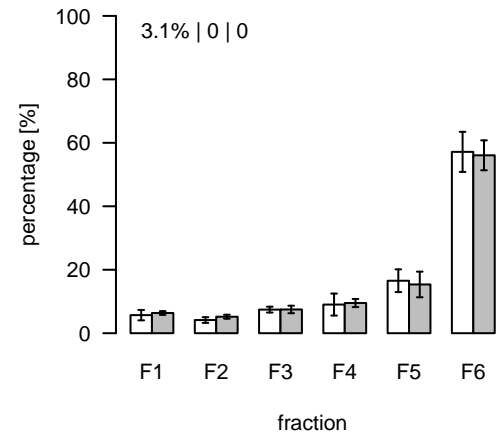

**L908 (m/z=928.554717; rt=5.93364)**  
T/S Cluster: L-5.9-4

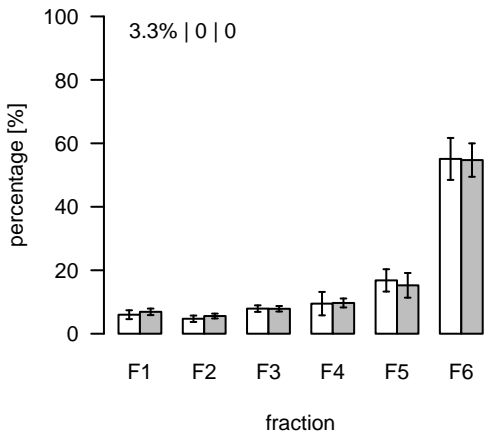

**L897 (m/z=700.45698; rt=5.90227)**  
T/S Cluster: L-5.9-4

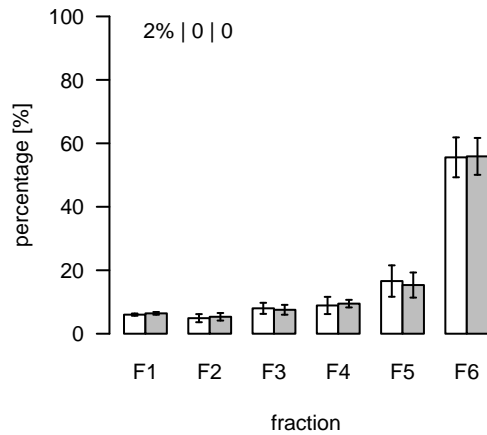

**L898 (m/z=700.442435; rt=5.90241)**  
T/S Cluster: L-5.9-4

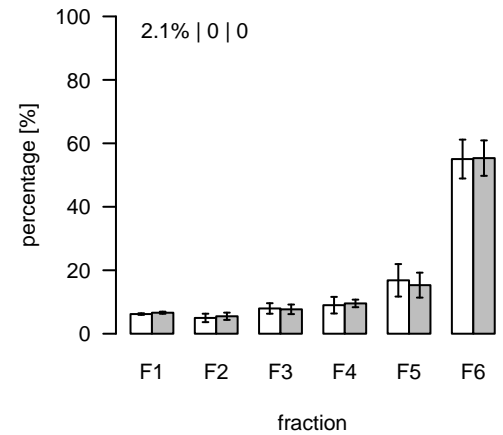

**L900 (m/z=463.800668; rt=5.93348)**  
T/S Cluster: L-5.9-4

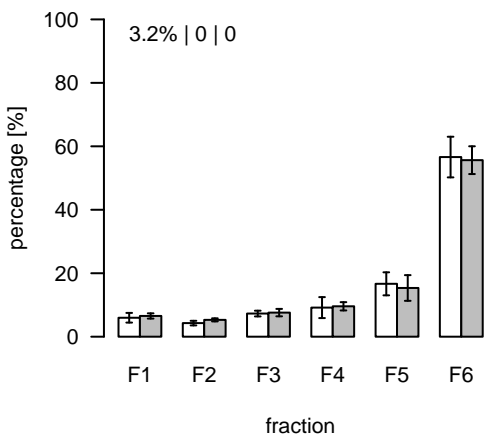

**L902 (m/z=463.79268; rt=5.93354)**  
T/S Cluster: L-5.9-4

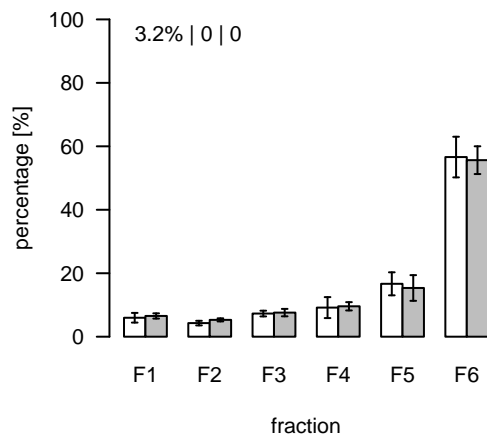

**L907 (m/z=463.280414; rt=5.93363)**  
T/S Cluster: L-5.9-4

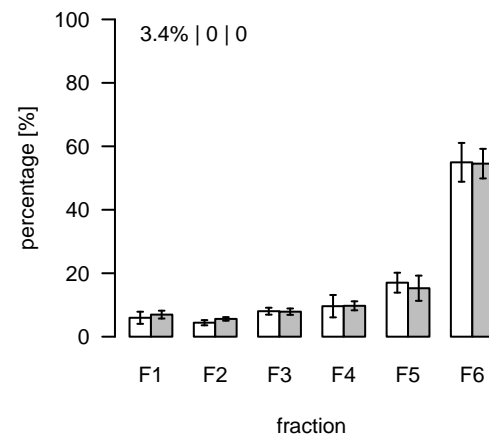

**L909 (m/z=927.683925; rt=5.93366)**  
T/S Cluster: L-5.9-4

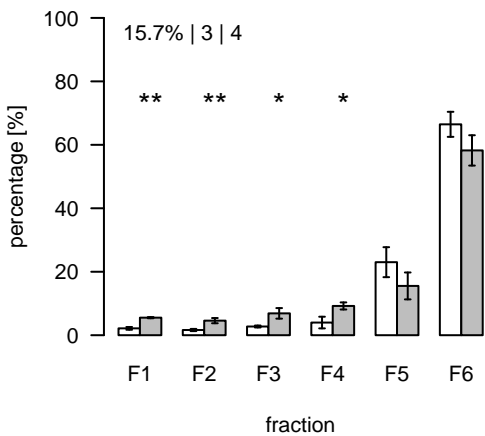

**L913 (m/z=750.512718; rt=5.93759)**  
T/S Cluster: L-5.9-4

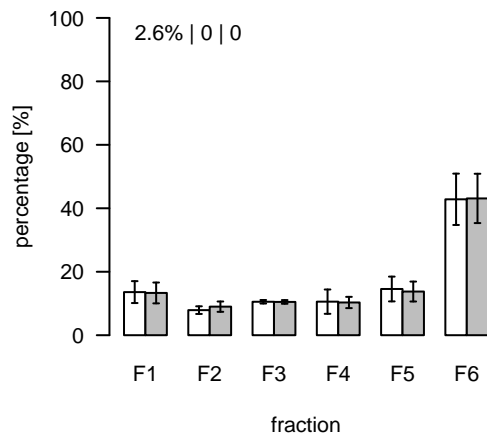

**L914 (m/z=750.492831; rt=5.93789)**  
T/S Cluster: L-5.9-4

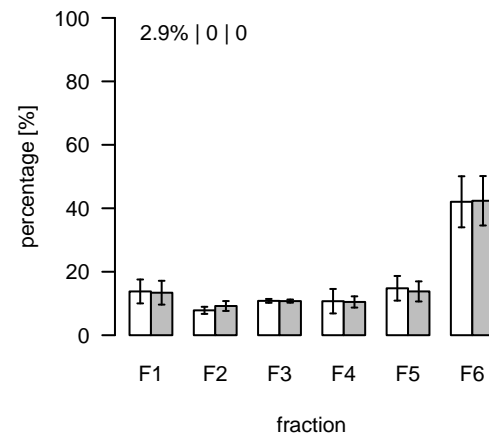

**L911 (m/z=931.536031; rt=5.93432)**  
T/S Cluster: L-5.9-5

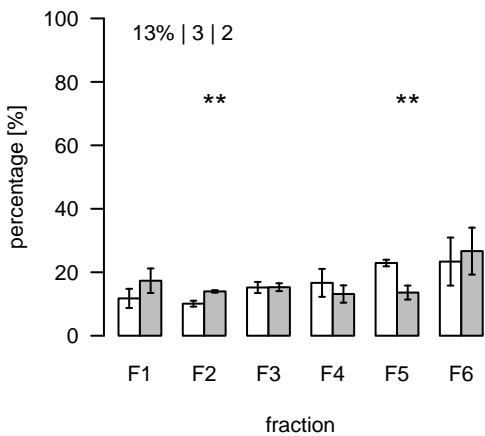

**L910 (m/z=931.563788; rt=5.93428)**  
T/S Cluster: L-5.9-5

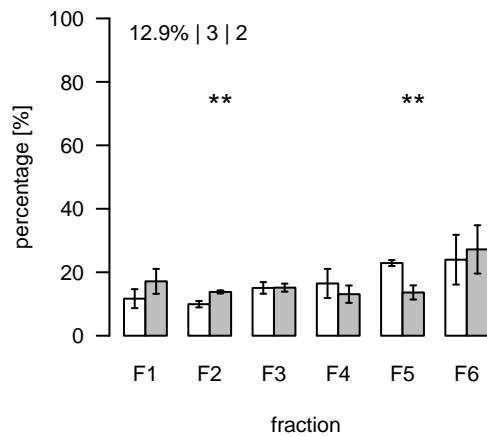

**L912 (m/z=932.547399; rt=5.93438)**  
T/S Cluster: L-5.9-5

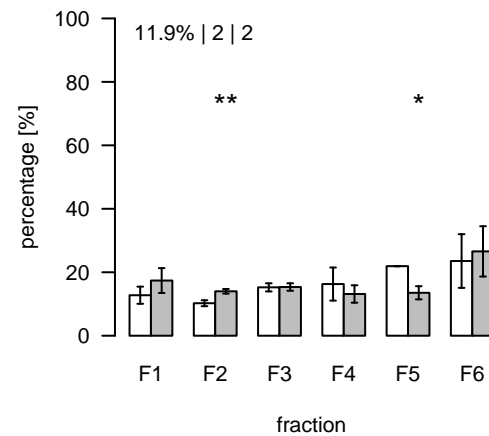

**L899 (m/z=932.607263; rt=5.93299)**  
T/S Cluster: L-5.9-5

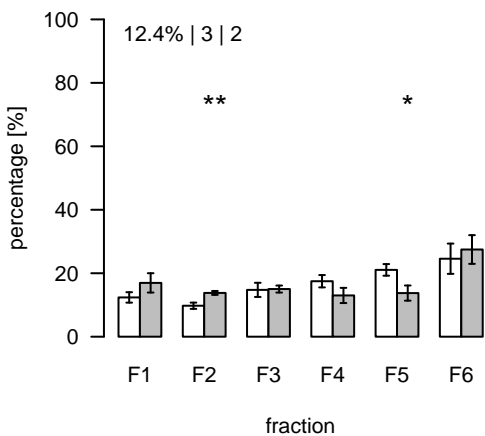

**L915 (m/z=834.545491; rt=5.9447)**  
T/S Cluster: L-5.9-6

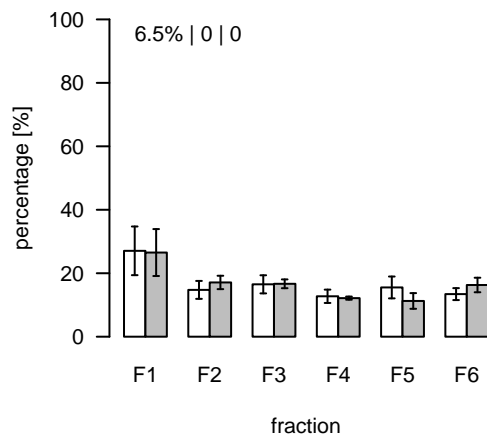

**L917 (m/z=463.295319; rt=5.95916)**  
T/S Cluster: L-6-1

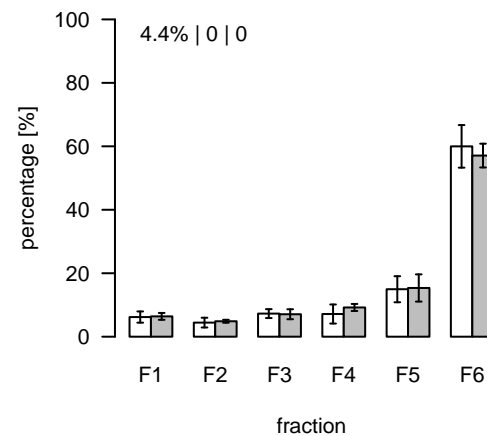

**L916 (m/z=463.797187; rt=5.9589)**  
T/S Cluster: L-6-1

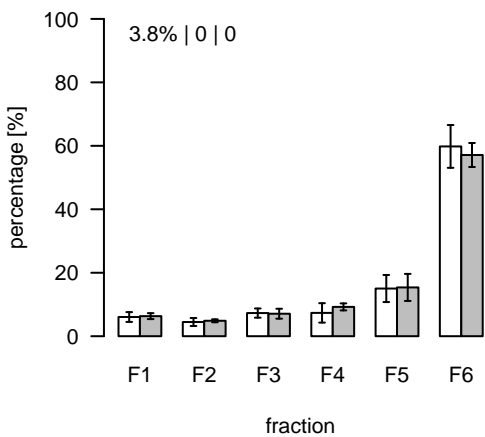

**L919 (m/z=931.543653; rt=5.96081)**  
T/S Cluster: L-6-2

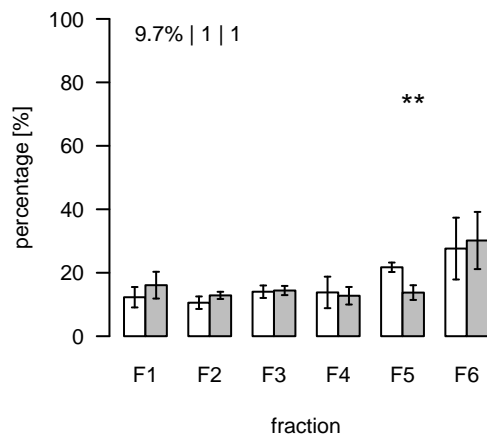

**L918 (m/z=931.597043; rt=5.95953)**  
T/S Cluster: L-6-2

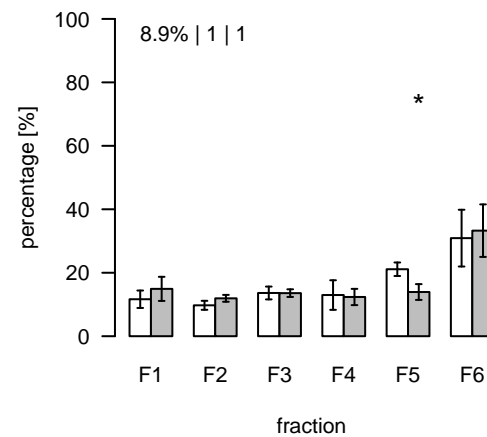

**L935 (m/z=684.462244; rt=6.12661)**  
T/S Cluster: L-6.1-1

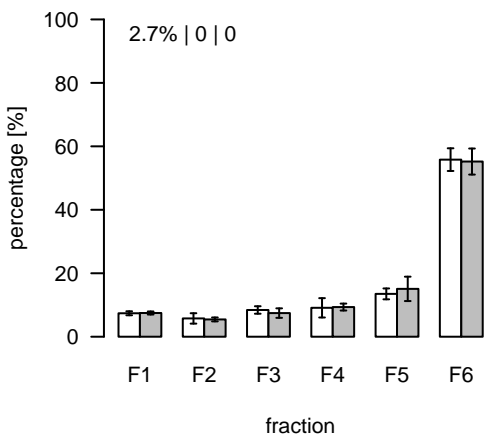

**L930 (m/z=667.436245; rt=6.12464)**  
T/S Cluster: L-6.1-1

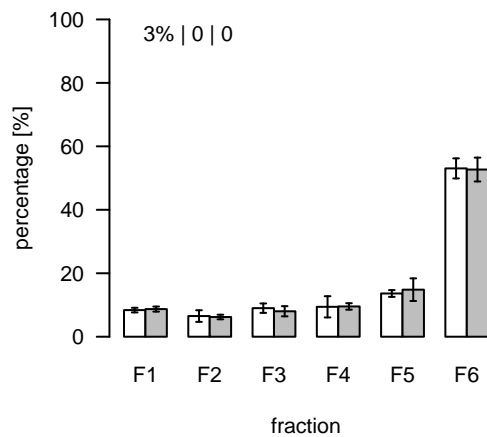

**L932 (m/z=684.439325; rt=6.12639)**  
T/S Cluster: L-6.1-1

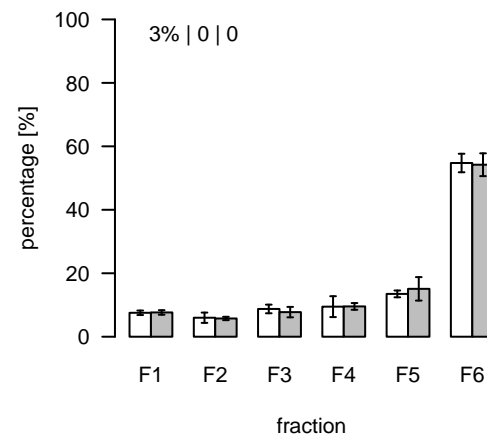

**L927 (m/z=667.418257; rt=6.12452)**  
T/S Cluster: L-6.1-1

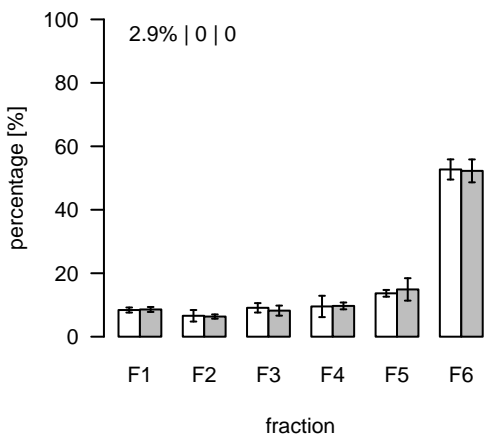

**L923 (m/z=950.647852; rt=6.10886)**  
T/S Cluster: L-6.1-1

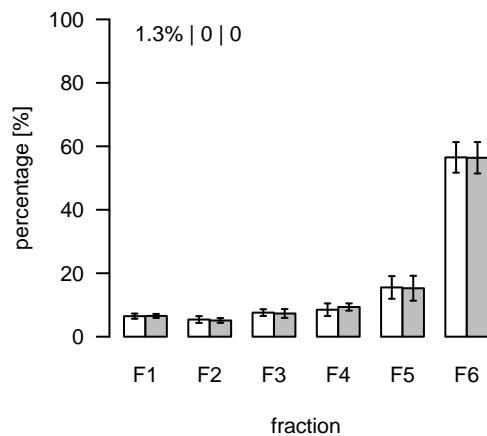

**L933 (m/z=685.465203; rt=6.12643)**  
T/S Cluster: L-6.1-1

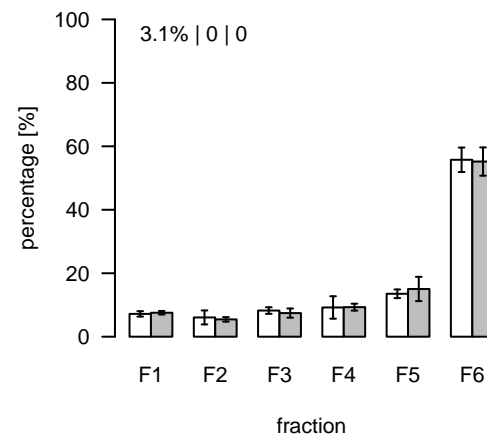

**L924 (m/z=951.627282; rt=6.10912)**  
T/S Cluster: L-6.1-1

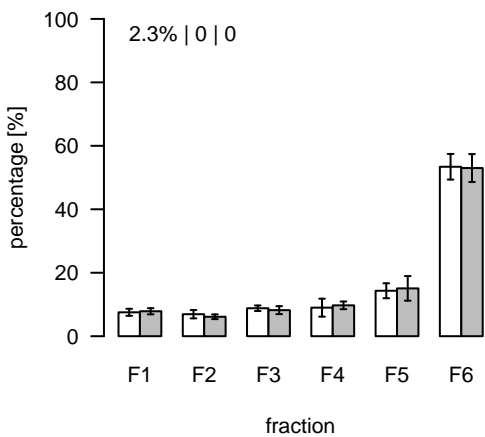

**L925 (m/z=951.651156; rt=6.10956)**  
T/S Cluster: L-6.1-1

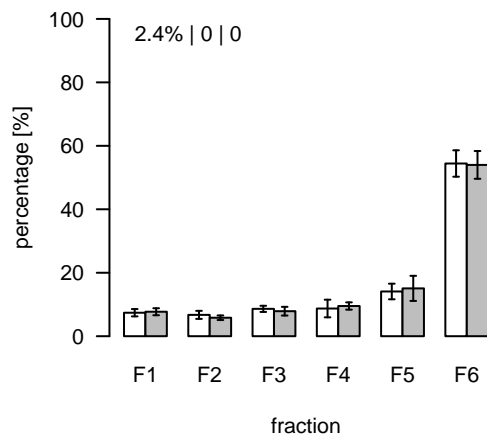

**L922 (m/z=950.602083; rt=6.10775)**  
T/S Cluster: L-6.1-1

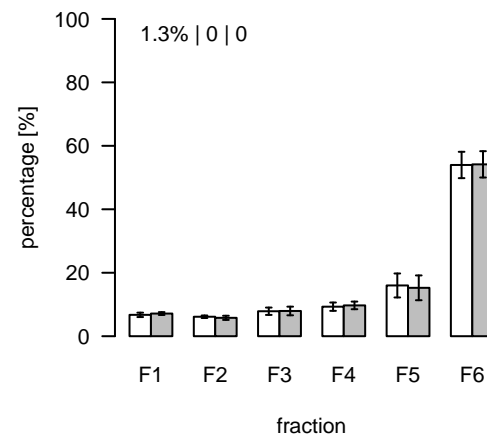

**L928 (m/z=668.439865; rt=6.12454)**  
T/S Cluster: L-6.1-1

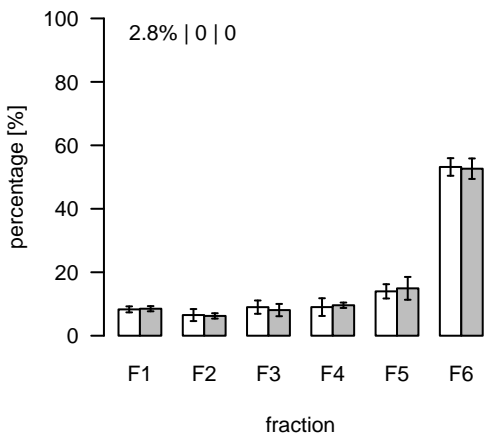

**L929 (m/z=668.423591; rt=6.12457)**  
T/S Cluster: L-6.1-1

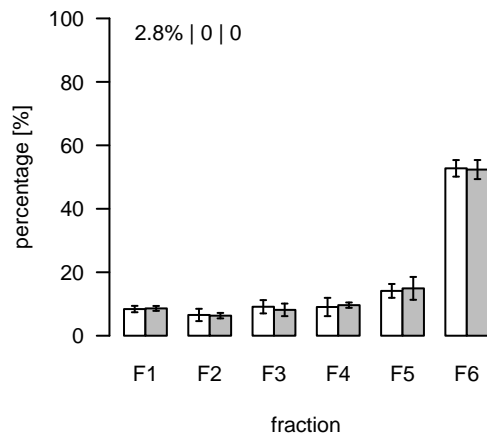

**L940 (m/z=389.135681; rt=6.12859)**  
T/S Cluster: L-6.1-1

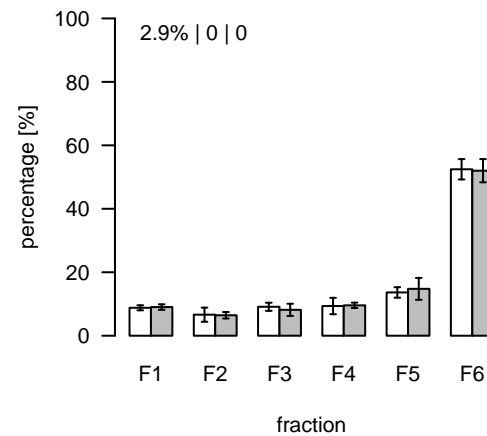

**L931 (m/z=685.440282; rt=6.12608)**  
T/S Cluster: L-6.1-1

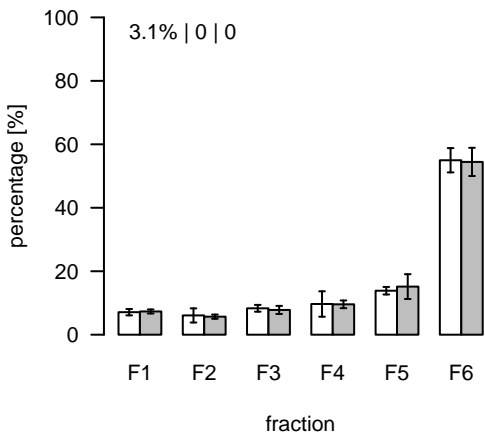

**L941 (m/z=389.12999; rt=6.12866)**  
T/S Cluster: L-6.1-1

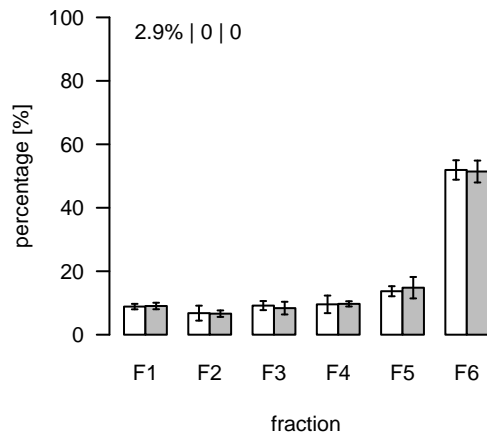

**L920 (m/z=948.62963; rt=6.08365)**  
T/S Cluster: L-6.1-1

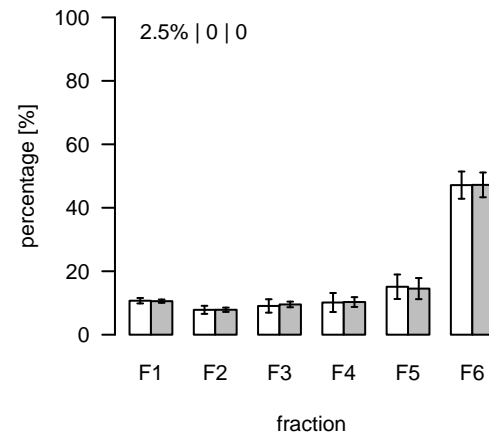

**L934 (m/z=342.230408; rt=6.12656)**  
T/S Cluster: L-6.1-1

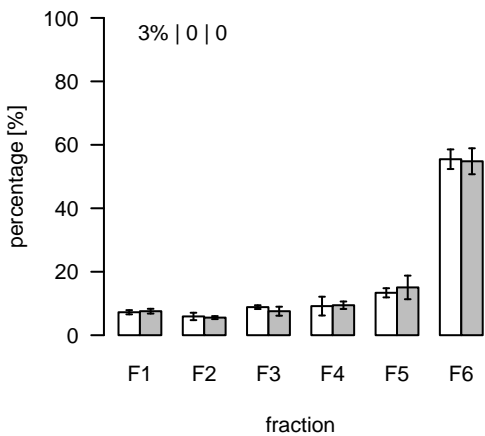

**L936 (m/z=342.234516; rt=6.12675)**  
T/S Cluster: L-6.1-1

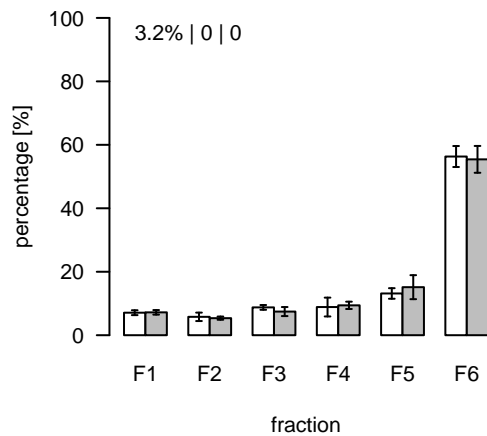

**L937 (m/z=786.576653; rt=6.12744)**  
T/S Cluster: L-6.1-1

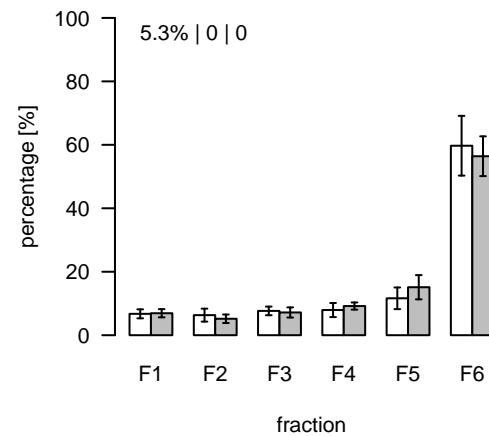

**L938 (m/z=786.577331; rt=6.12753)**  
T/S Cluster: L-6.1-1

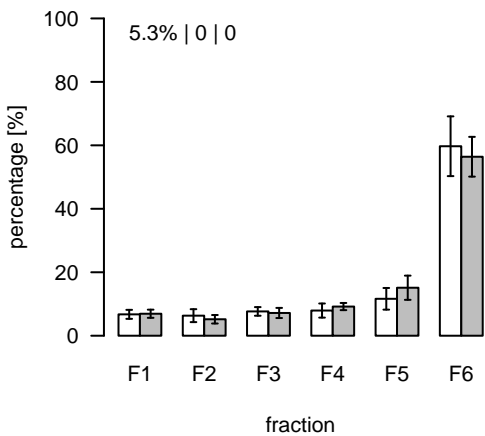

**L921 (m/z=955.600851; rt=6.10552)**  
T/S Cluster: L-6.1-2

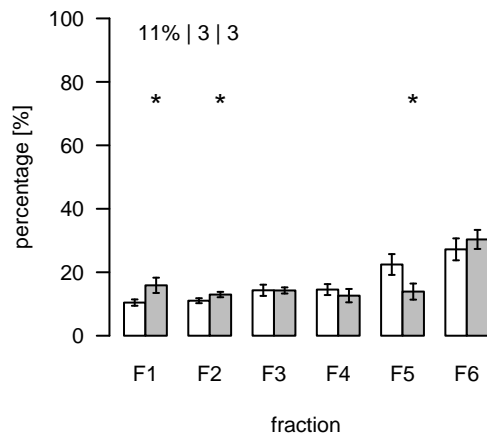

**L926 (m/z=689.41694; rt=6.12405)**  
T/S Cluster: L-6.1-3

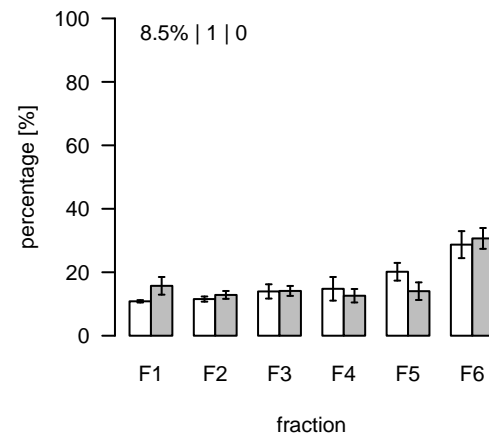

**L939 (m/z=792.571794; rt=6.12845)**  
T/S Cluster: L-6.1-4

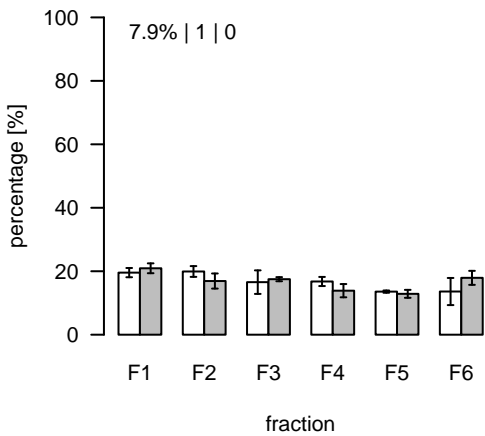

**L942 (m/z=834.547321; rt=6.13211)**  
T/S Cluster: L-6.1-5

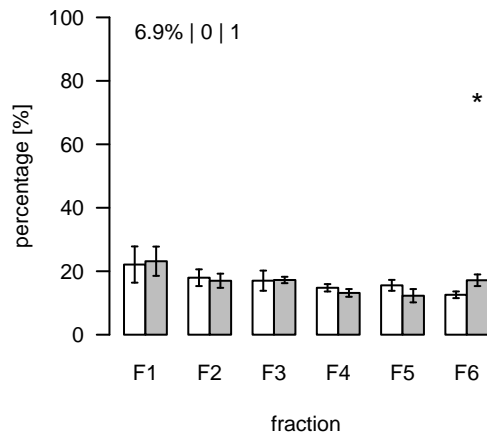

**L950 (m/z=772.554167; rt=6.14163)**  
T/S Cluster: L-6.1-6

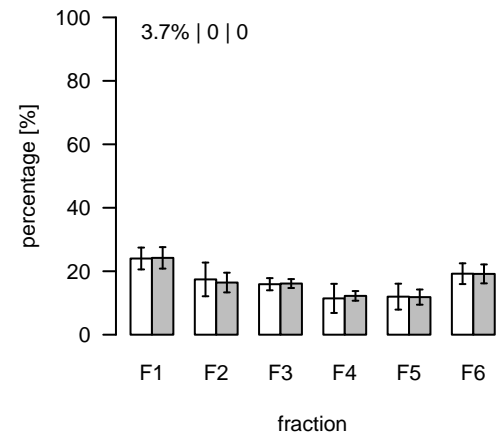

**L945 (m/z=772.529948; rt=6.14147)**  
T/S Cluster: L-6.1-6

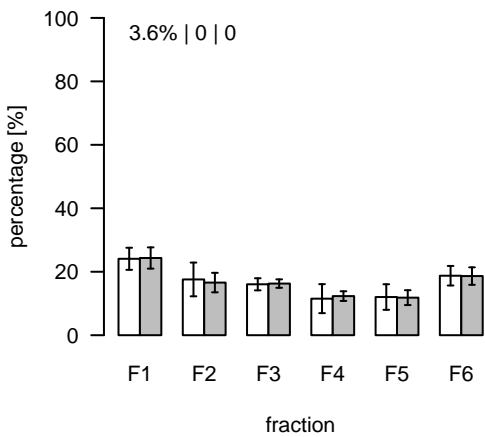

**L947 (m/z=773.555626; rt=6.14153)**  
T/S Cluster: L-6.1-6

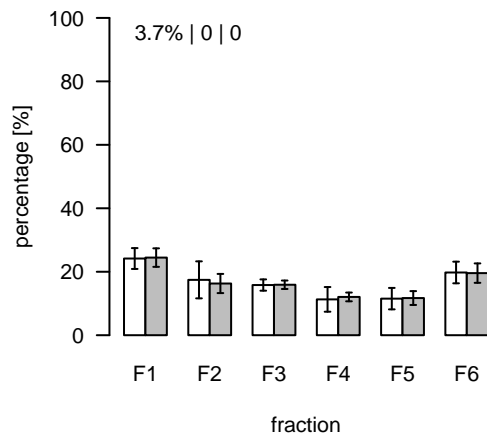

**L948 (m/z=773.556938; rt=6.14155)**  
T/S Cluster: L-6.1-6

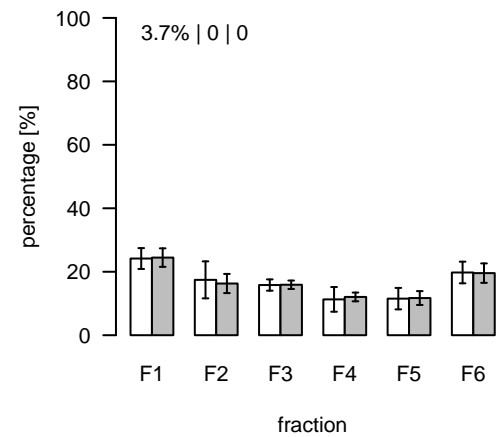

**L949 (m/z=386.275206; rt=6.14158)**  
T/S Cluster: L-6.1-6

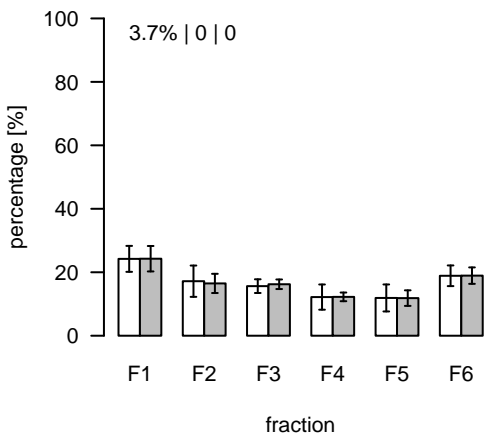

**L946 (m/z=386.281654; rt=6.14147)**  
T/S Cluster: L-6.1-6

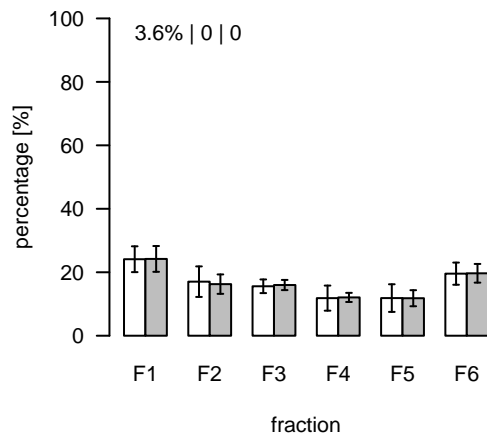

**L944 (m/z=772.606223; rt=6.14022)**  
T/S Cluster: L-6.1-6

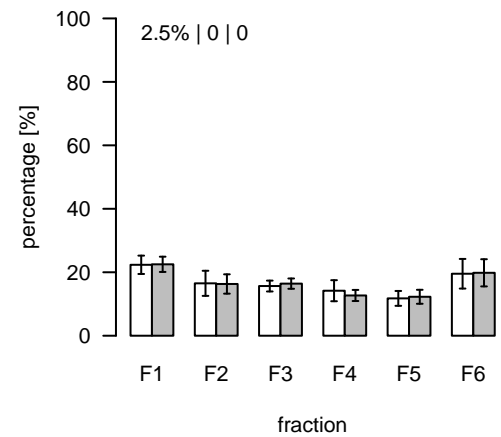



**L952 (m/z=773.605414; rt=6.14266)**  
T/S Cluster: L-6.1-6

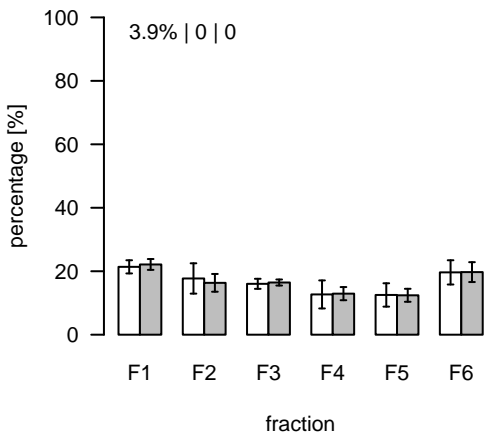

**L943 (m/z=386.778789; rt=6.13999)**  
T/S Cluster: L-6.1-6

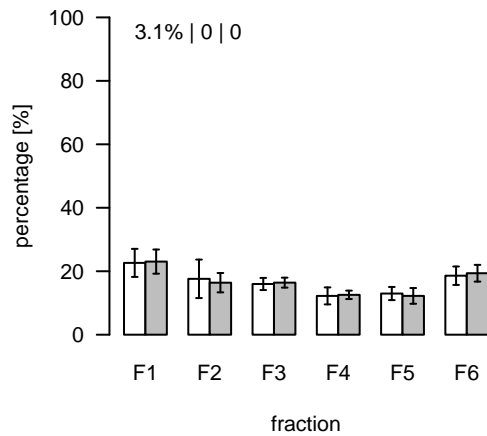

**L951 (m/z=257.521106; rt=6.1419)**  
T/S Cluster: L-6.1-6

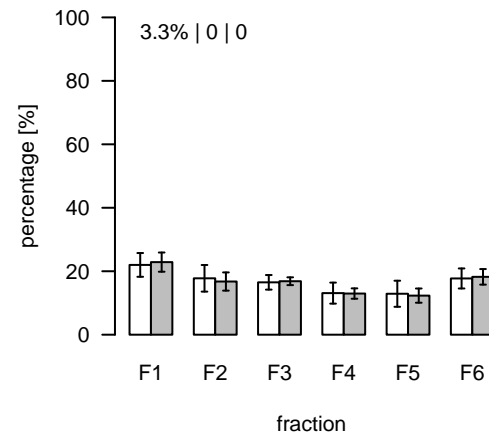

**L953 (m/z=391.282876; rt=6.15096)**  
T/S Cluster: L-6.2-1

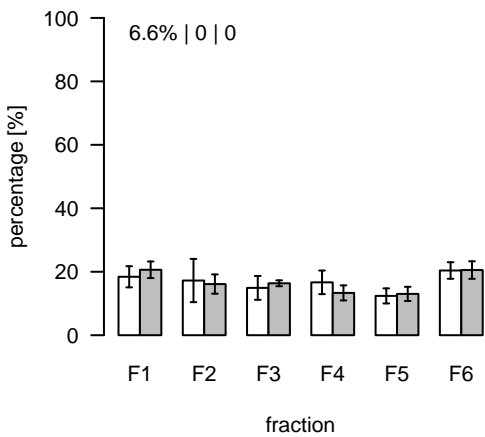

**L955 (m/z=391.285682; rt=6.15135)**  
T/S Cluster: L-6.2-1

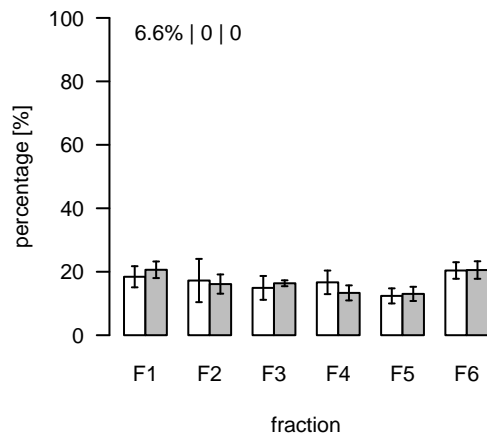

**L958 (m/z=790.564346; rt=6.15282)**  
T/S Cluster: L-6.2-2

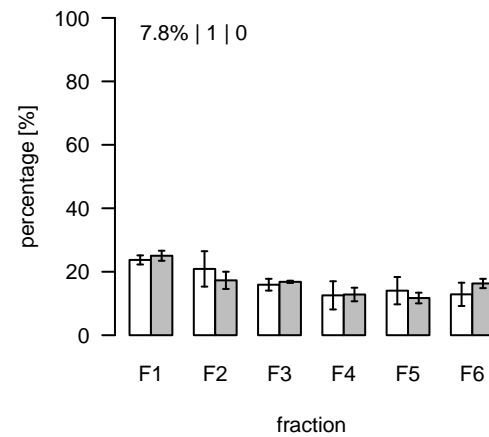

**L956 (m/z=790.548428; rt=6.15226)**  
T/S Cluster: L-6.2-2

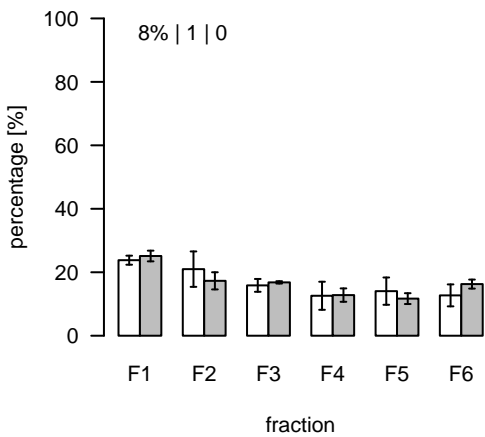

**L954 (m/z=791.548369; rt=6.15106)**  
T/S Cluster: L-6.2-2

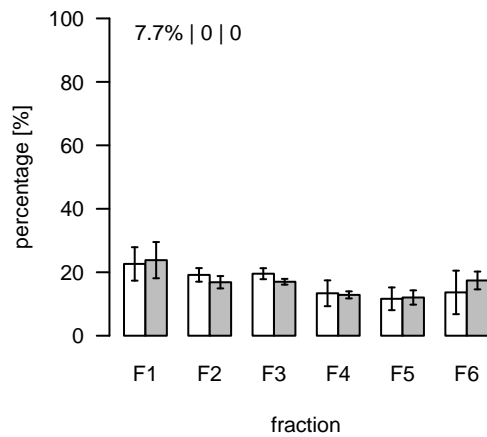

**L959 (m/z=791.571987; rt=6.15337)**  
T/S Cluster: L-6.2-2

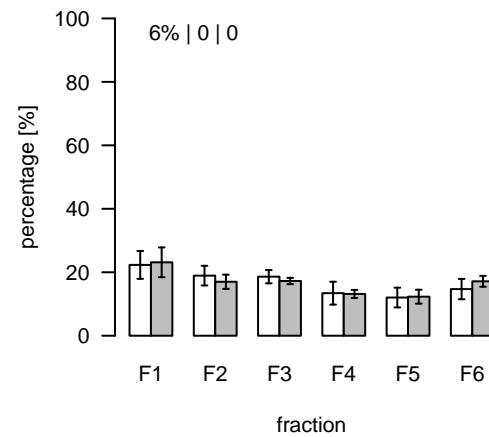

**L957 (m/z=794.534934; rt=6.15258)**  
T/S Cluster: L-6.2-3

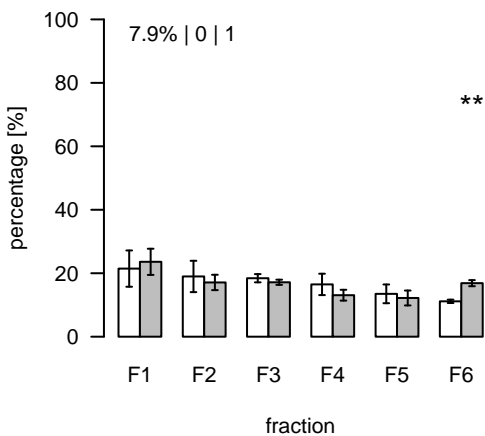

**L960 (m/z=794.558068; rt=6.15357)**  
T/S Cluster: L-6.2-4

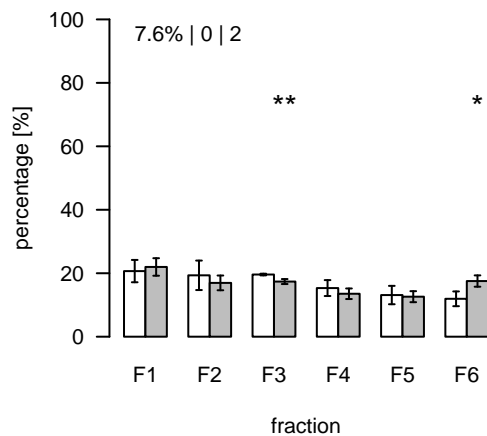

**L964 (m/z=774.567973; rt=6.18907)**  
T/S Cluster: L-6.2-5

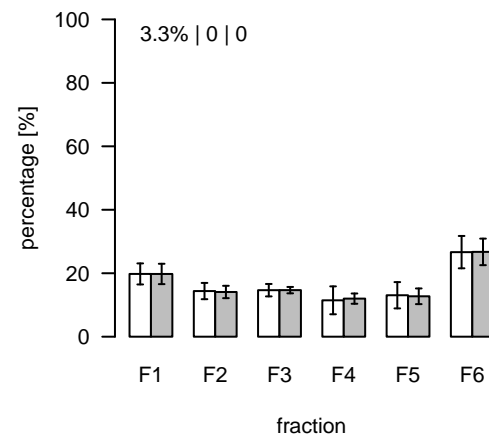

**L968 (m/z=775.573129; rt=6.19001)**  
T/S Cluster: L-6.2-5

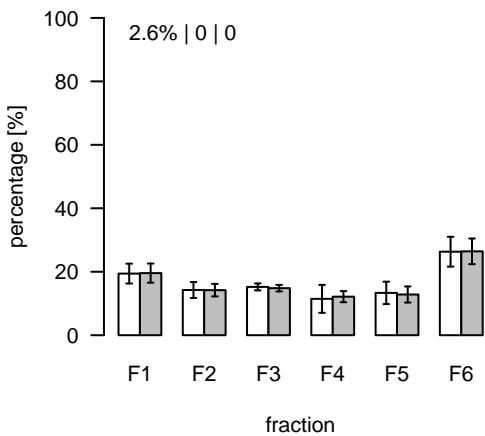

**L970 (m/z=775.548871; rt=6.19013)**  
T/S Cluster: L-6.2-5

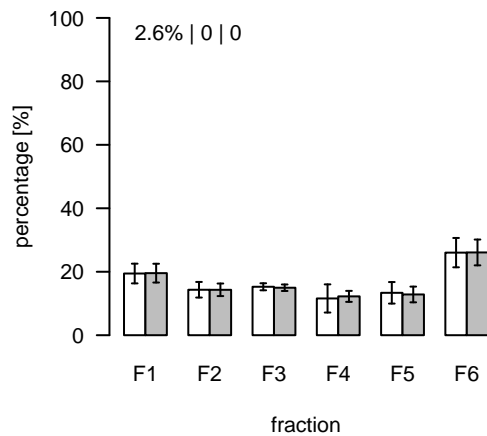

**L963 (m/z=774.530842; rt=6.18858)**  
T/S Cluster: L-6.2-5

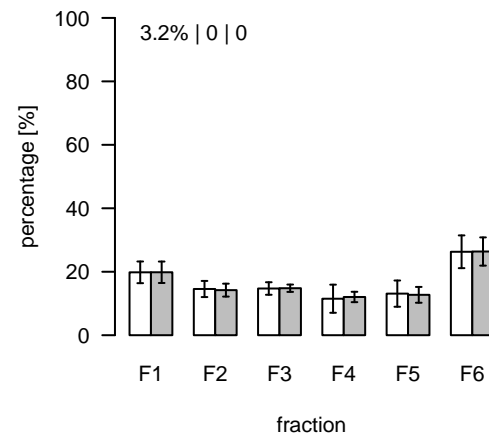

**L969 (m/z=776.574217; rt=6.19002)**  
T/S Cluster: L-6.2-5

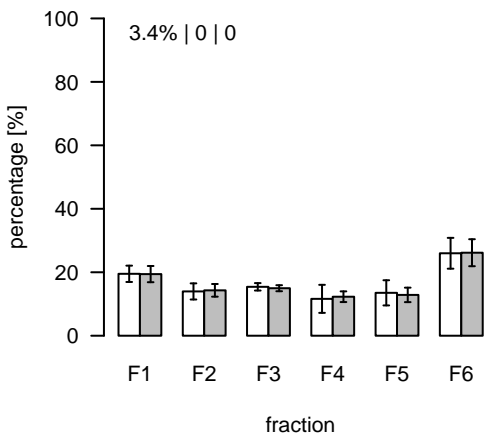

**L977 (m/z=387.282806; rt=6.19158)**  
T/S Cluster: L-6.2-5

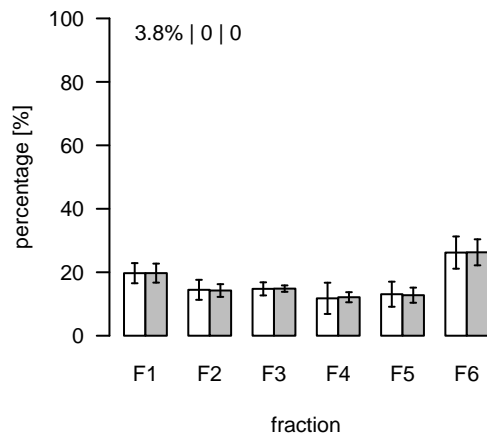

**L975 (m/z=387.289155; rt=6.19079)**  
T/S Cluster: L-6.2-5

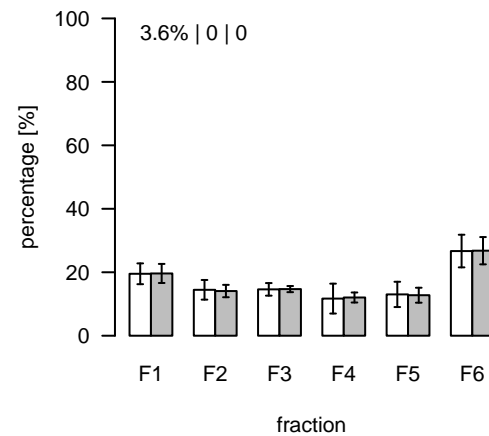

**L976 (m/z=387.784649; rt=6.19113)**  
T/S Cluster: L-6.2-5

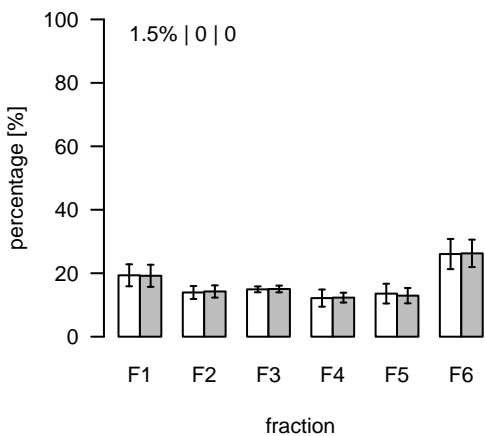

**L978 (m/z=258.193991; rt=6.19217)**  
T/S Cluster: L-6.2-5

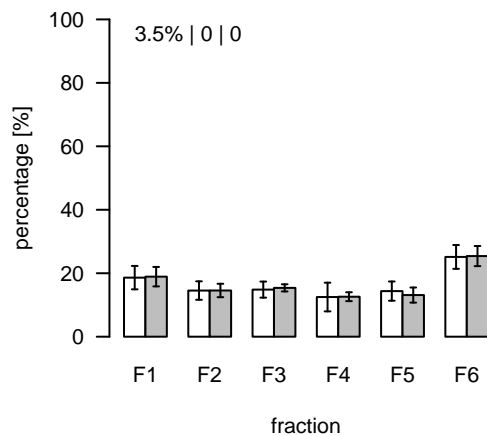

**L979 (m/z=258.191421; rt=6.19451)**  
T/S Cluster: L-6.2-5

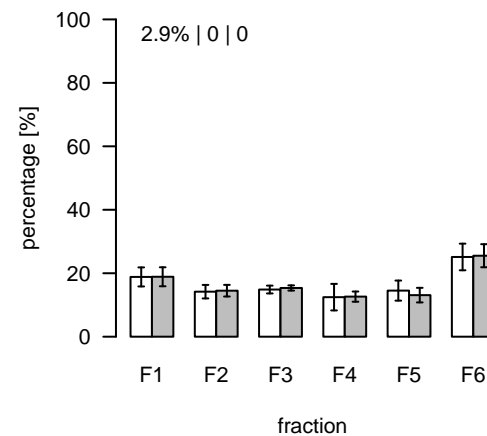

**L972 (m/z=387.79131; rt=6.19031)**  
T/S Cluster: L-6.2-5

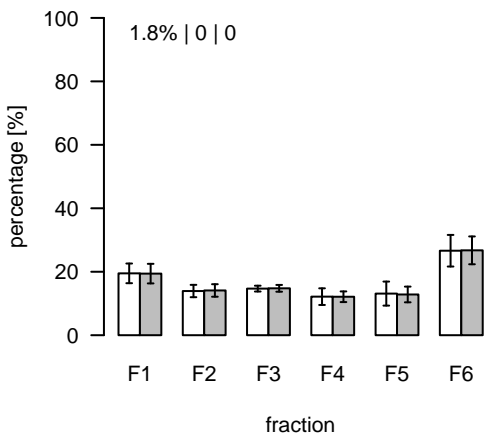

**L961 (m/z=756.55724; rt=6.18541)**  
T/S Cluster: L-6.2-5

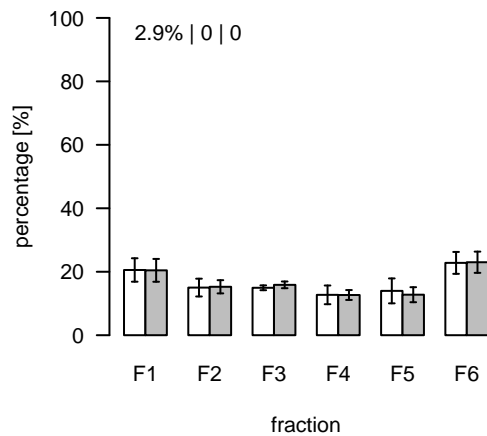

**L973 (m/z=258.527473; rt=6.19037)**  
T/S Cluster: L-6.2-5

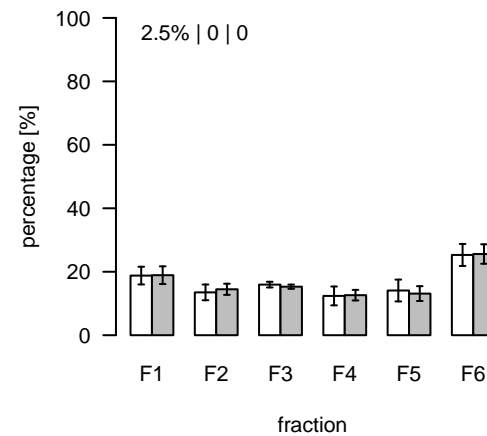

**L962 (m/z=777.57777; rt=6.18806)**  
T/S Cluster: L-6.2-6

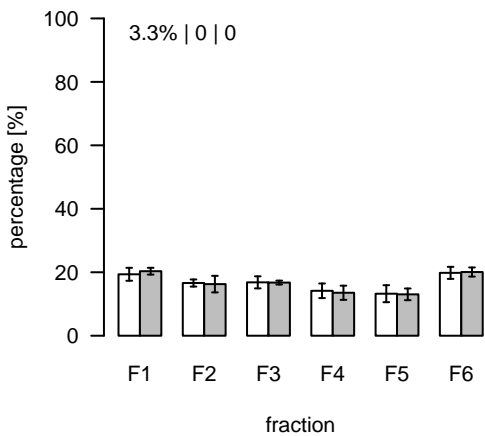

**L965 (m/z=796.554339; rt=6.18952)**  
T/S Cluster: L-6.2-7

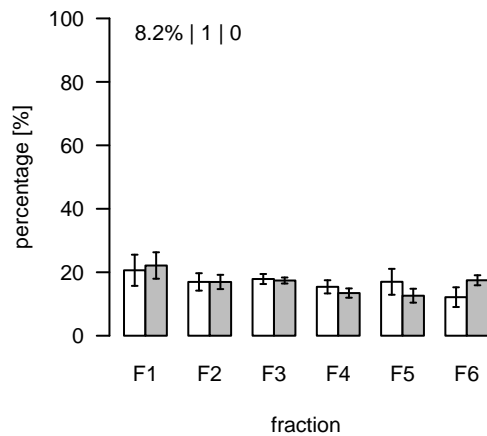

**L967 (m/z=796.549956; rt=6.1899)**  
T/S Cluster: L-6.2-7

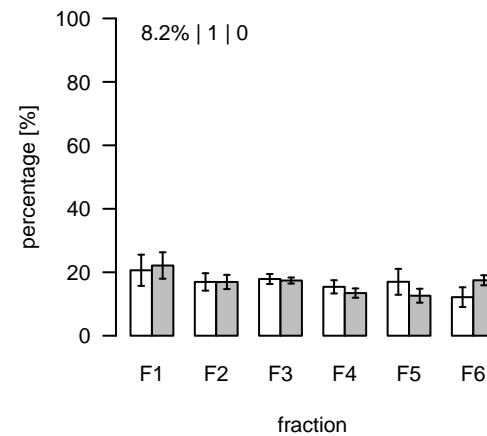

**L974 (m/z=796.529682; rt=6.19047)**  
T/S Cluster: L-6.2-7

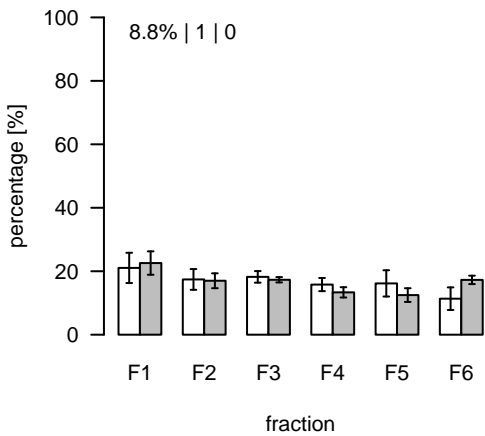

**L971 (m/z=797.552708; rt=6.19016)**  
T/S Cluster: L-6.2-8

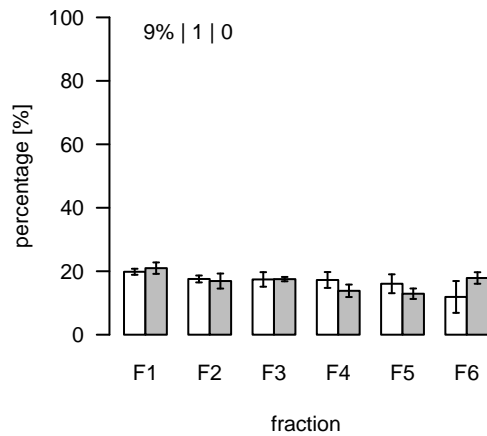

**L966 (m/z=797.535445; rt=6.18961)**  
T/S Cluster: L-6.2-8

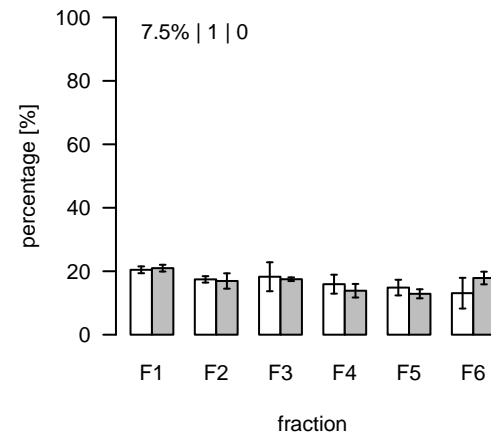

**L980 (m/z=776.52916; rt=6.19824)**  
T/S Cluster: L-6.2-9

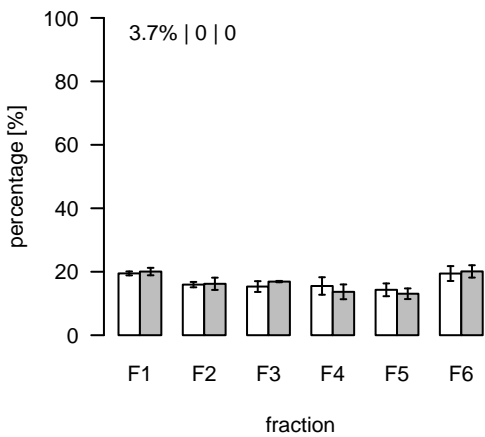

**L981 (m/z=757.559085; rt=6.20157)**  
T/S Cluster: L-6.2-10

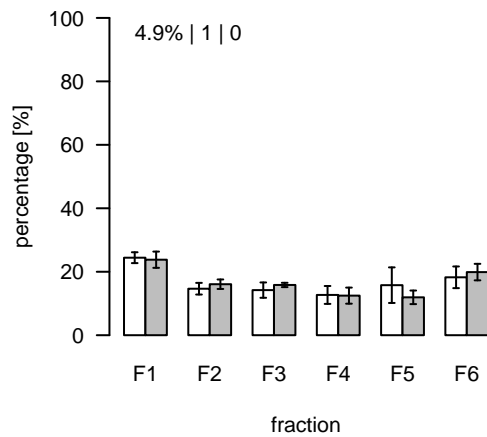

**L985 (m/z=948.630741; rt=6.22824)**  
T/S Cluster: L-6.2-11

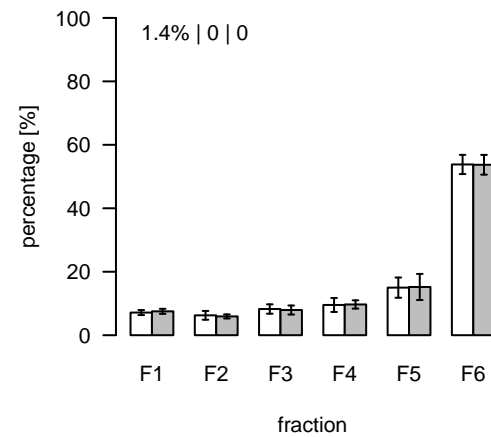

**L984 (m/z=949.634048; rt=6.22809)**  
T/S Cluster: L-6.2-11

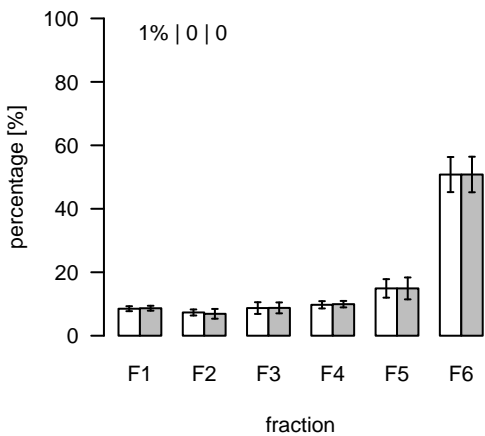

**L982 (m/z=949.69035; rt=6.22054)**  
T/S Cluster: L-6.2-11

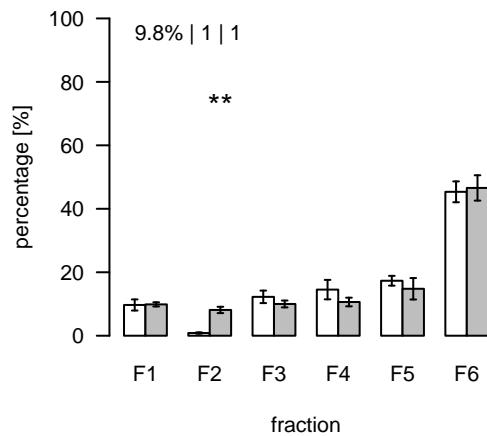

**L986 (m/z=948.57195; rt=6.22924)**  
T/S Cluster: L-6.2-12

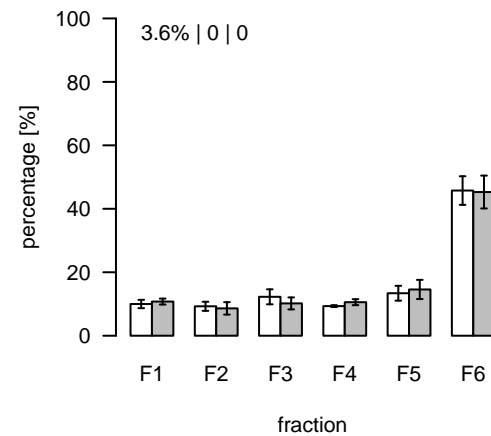

**L983 (m/z=948.704544; rt=6.22596)**  
T/S Cluster: L-6.2-12

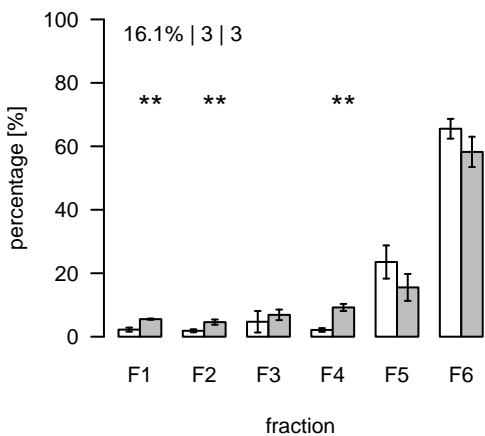

**L994 (m/z=800.584177; rt=6.30623)**  
T/S Cluster: L-6.3-1

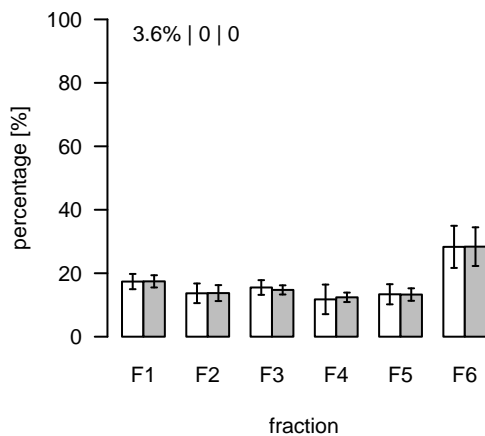

**L995 (m/z=801.588866; rt=6.30706)**  
T/S Cluster: L-6.3-1

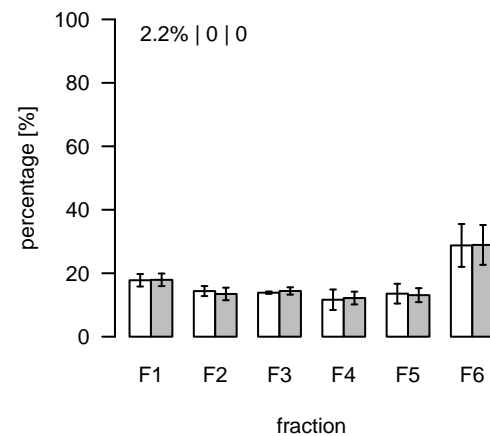

**L993 (m/z=800.54395; rt=6.30598)**  
T/S Cluster: L-6.3-1

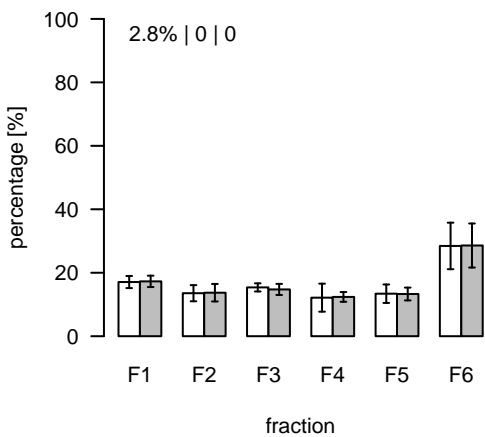

**L987 (m/z=801.587441; rt=6.27979)**  
T/S Cluster: L-6.3-1

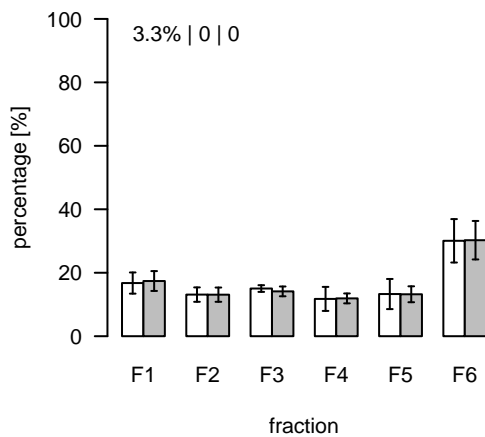

**L997 (m/z=801.557728; rt=6.30769)**  
T/S Cluster: L-6.3-1

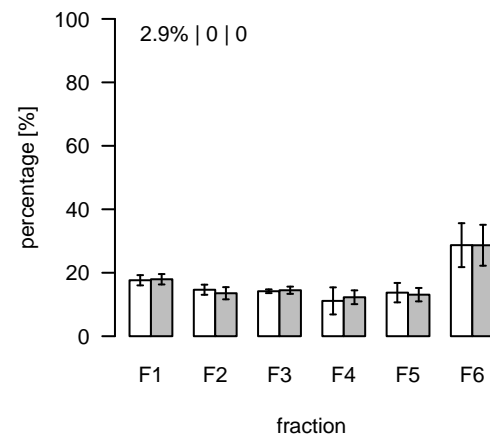

**L996 (m/z=802.59213; rt=6.30747)**  
T/S Cluster: L-6.3-1

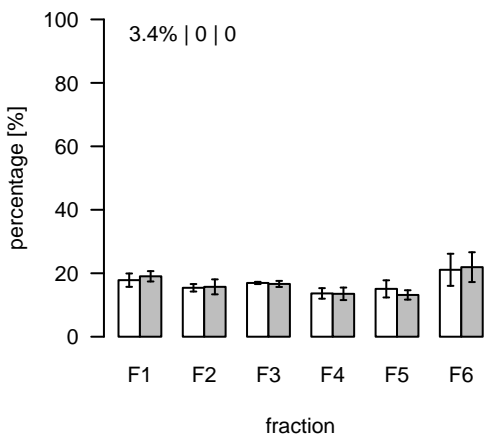

**L990 (m/z=798.568567; rt=6.28283)**  
T/S Cluster: L-6.3-2

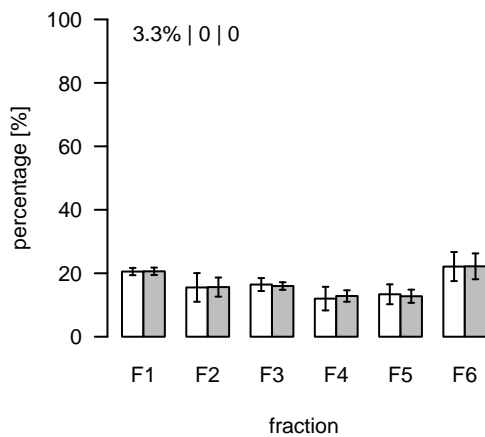

**L991 (m/z=798.548631; rt=6.28301)**  
T/S Cluster: L-6.3-2

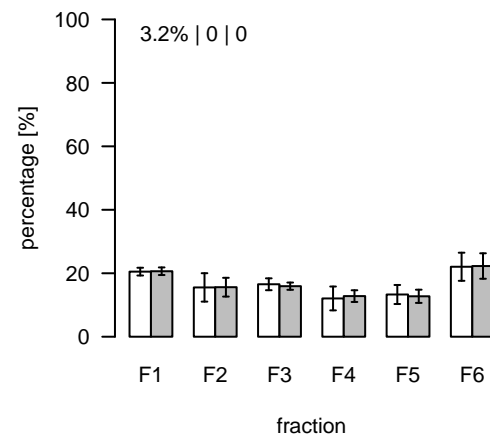

**L989 (m/z=799.575764; rt=6.28204)**  
T/S Cluster: L-6.3-2

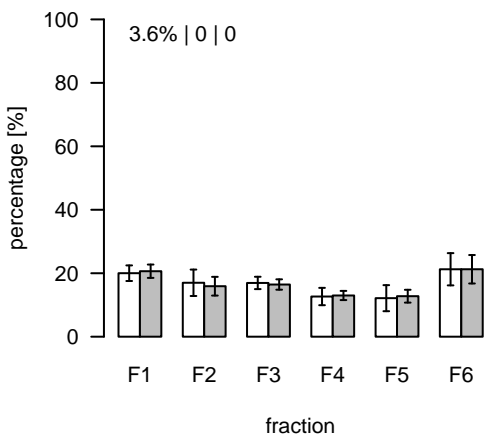

**L988 (m/z=799.553593; rt=6.28193)**  
T/S Cluster: L-6.3-2

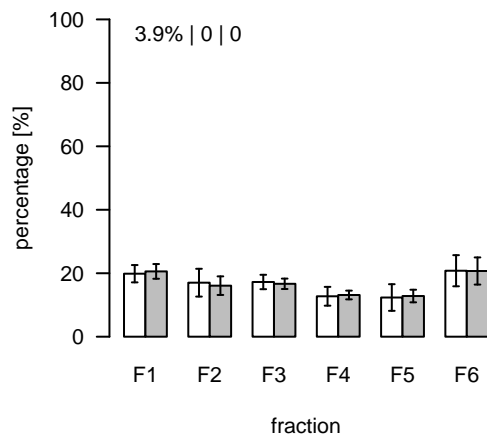

**L992 (m/z=399.285022; rt=6.28332)**  
T/S Cluster: L-6.3-3

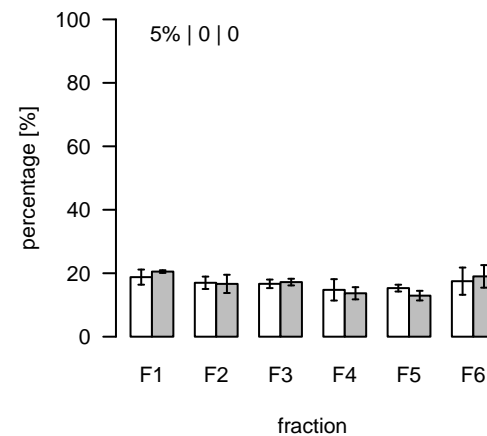

**L998 (m/z=400.292877; rt=6.30861)**  
T/S Cluster: L-6.3-4

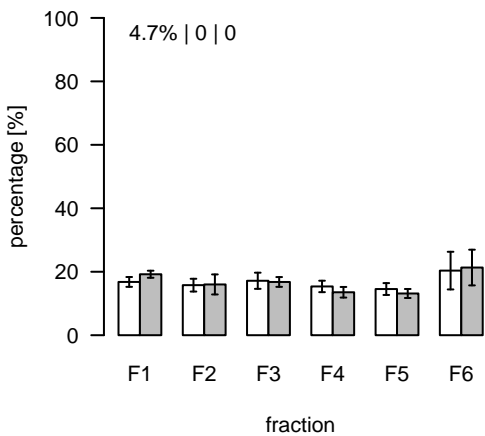

**L1000 (m/z=794.534284; rt=6.33876)**  
T/S Cluster: L-6.3-5

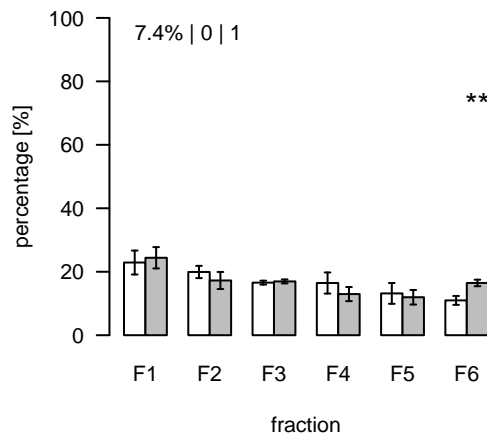

**L999 (m/z=794.547349; rt=6.33834)**  
T/S Cluster: L-6.3-5

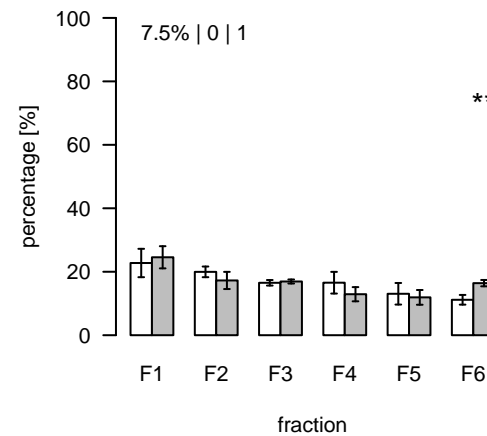

**L1002 (m/z=794.529689; rt=6.33911)**  
T/S Cluster: L-6.3-5

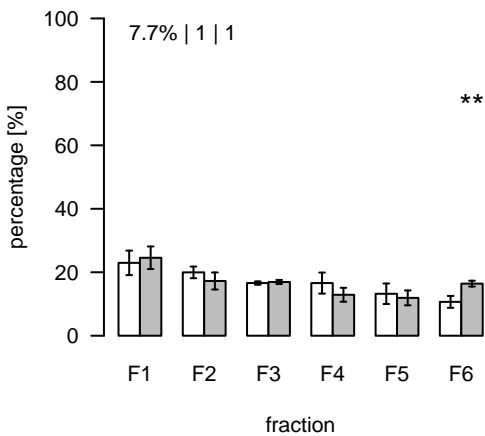

**L1005 (m/z=772.553882; rt=6.33942)**  
T/S Cluster: L-6.3-6

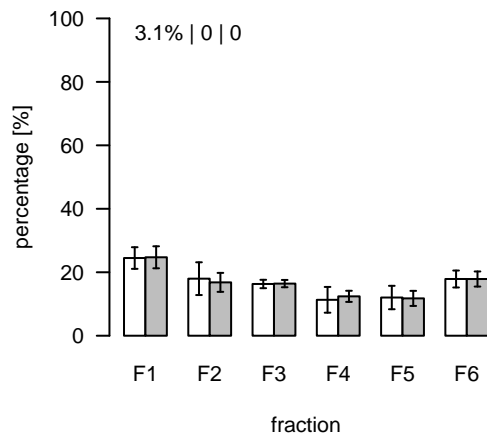

**L1006 (m/z=772.5302; rt=6.33945)**  
T/S Cluster: L-6.3-6

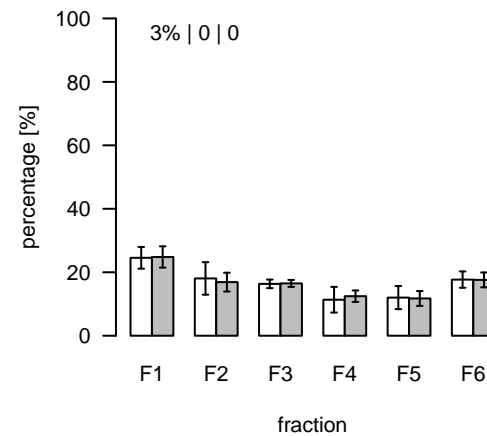

**L1003 (m/z=773.556884; rt=6.33923)**  
T/S Cluster: L-6.3-6

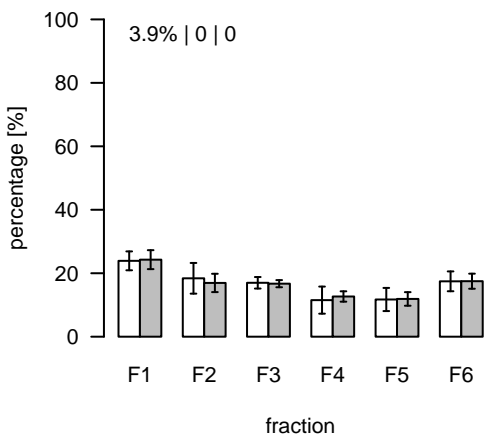

**L1004 (m/z=773.529574; rt=6.33934)**  
T/S Cluster: L-6.3-6

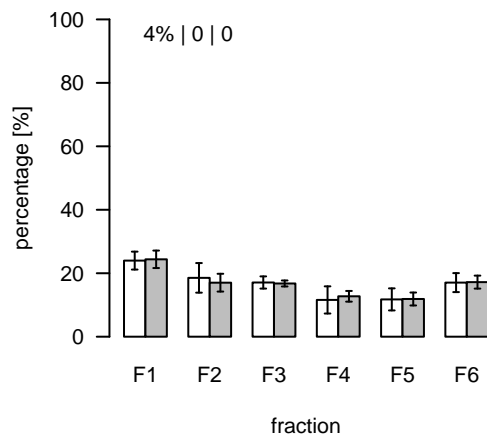

**L1007 (m/z=386.275086; rt=6.33968)**  
T/S Cluster: L-6.3-6

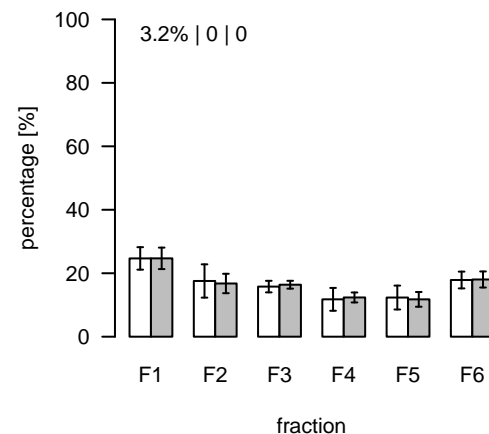

**L1008 (m/z=386.281495; rt=6.33976)**  
T/S Cluster: L-6.3-6

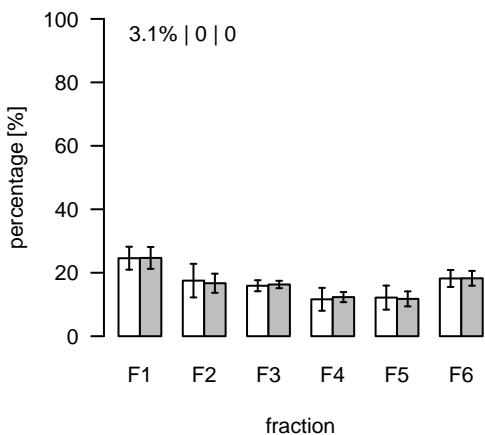

**L1009 (m/z=386.778675; rt=6.34076)**  
T/S Cluster: L-6.3-6

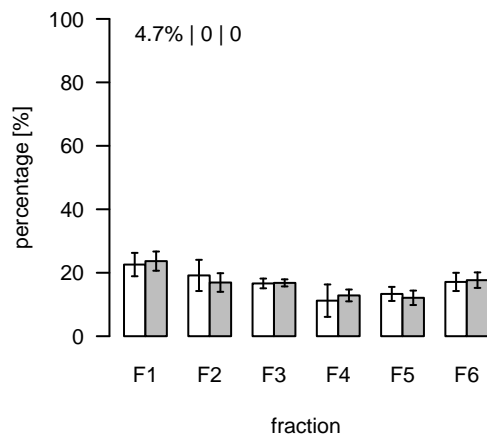

**L1001 (m/z=257.520908; rt=6.33897)**  
T/S Cluster: L-6.3-6

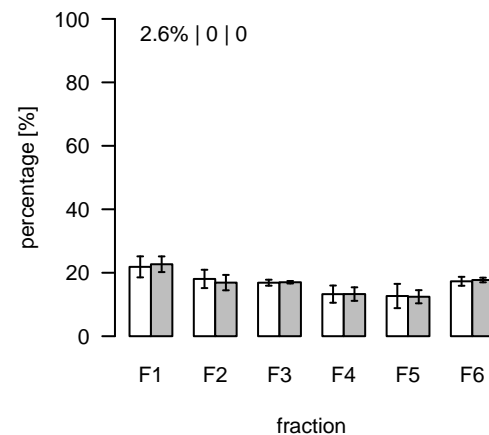

**L1010 (m/z=812.580292; rt=6.42039)**  
T/S Cluster: L-6.4-1

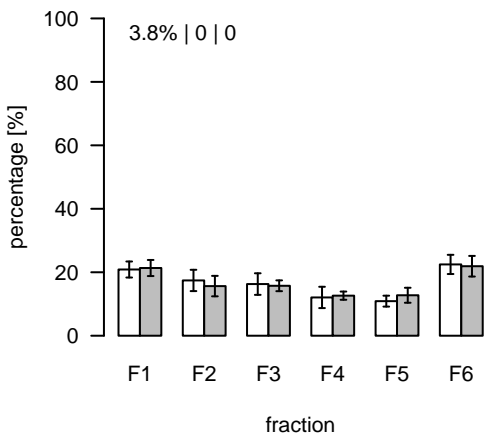

**L1011 (m/z=810.542255; rt=6.42228)**  
T/S Cluster: L-6.4-2

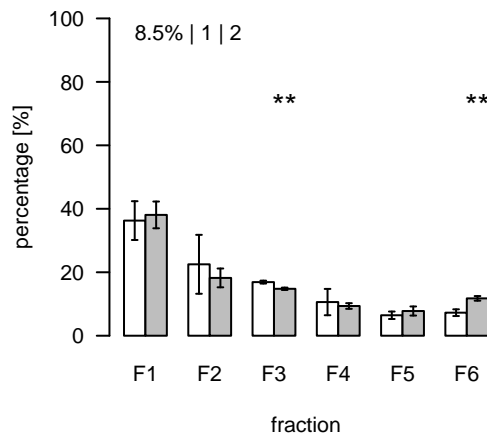

**L1013 (m/z=811.546194; rt=6.42299)**  
T/S Cluster: L-6.4-2

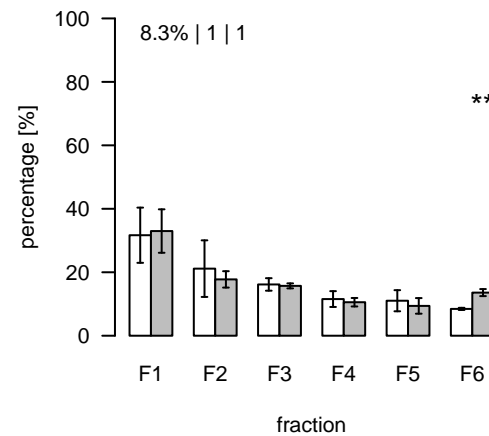

**L1014 (m/z=811.539944; rt=6.42343)**  
T/S Cluster: L-6.4-2

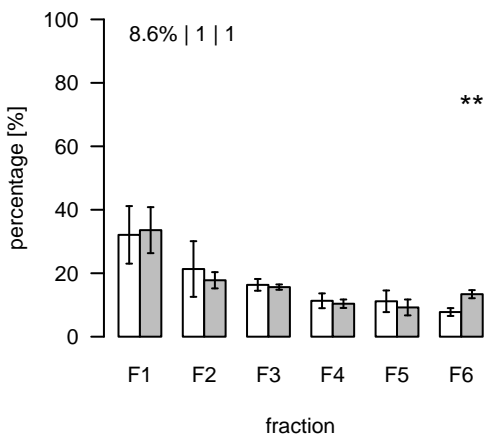

**L1012 (m/z=812.546212; rt=6.42238)**  
T/S Cluster: L-6.4-3

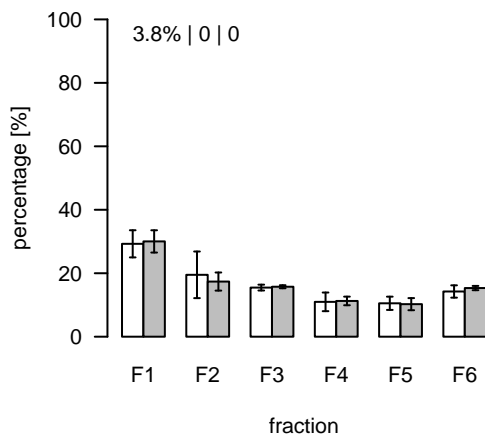

**L1016 (m/z=776.583235; rt=6.44457)**  
T/S Cluster: L-6.4-4

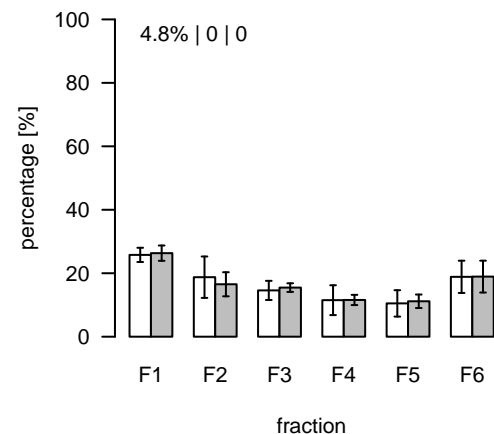

**L1015 (m/z=777.585308; rt=6.44393)**  
T/S Cluster: L-6.4-4

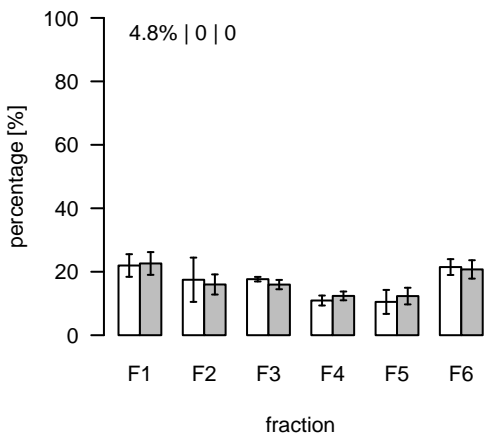

**L1088 (m/z=764.533918; rt=6.54777)**  
T/S Cluster: L-6.5-1

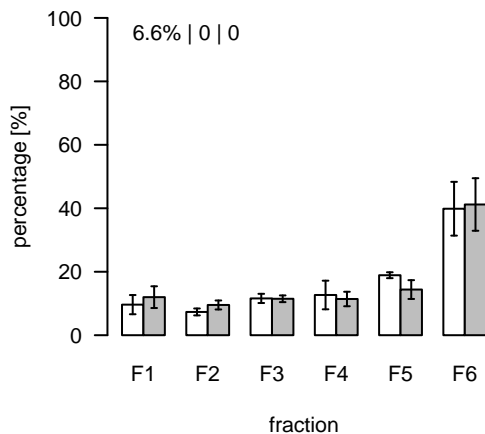

**L1070 (m/z=765.537533; rt=6.54762)**  
T/S Cluster: L-6.5-1

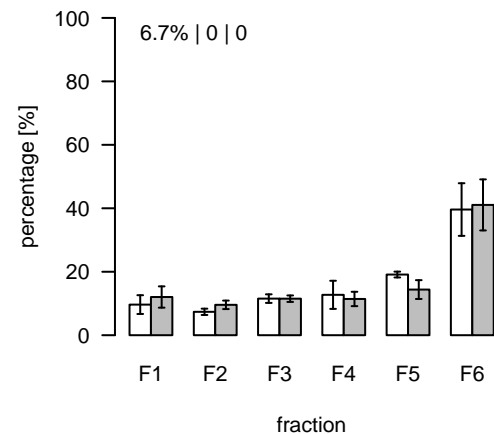

**L1057 (m/z=766.541752; rt=6.54753)**  
T/S Cluster: L-6.5-1

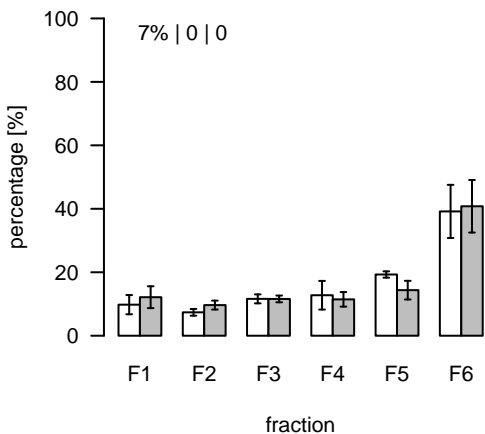

**L1085 (m/z=382.268123; rt=6.54773)**  
T/S Cluster: L-6.5-1

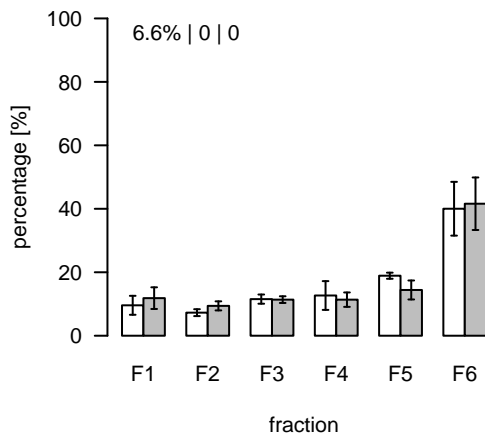

**L1066 (m/z=382.770083; rt=6.54761)**  
T/S Cluster: L-6.5-1

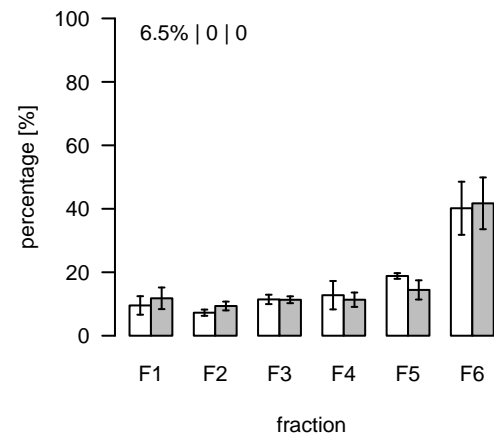



**L1087 (m/z=254.848408; rt=6.54776)**  
T/S Cluster: L-6.5-1

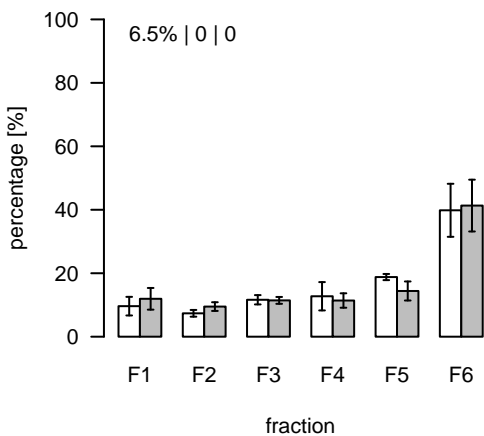

**L1062 (m/z=766.504795; rt=6.54755)**  
T/S Cluster: L-6.5-1

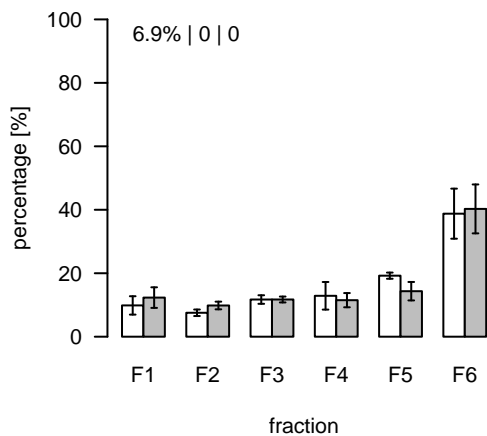

**L1068 (m/z=585.45593; rt=6.54761)**  
T/S Cluster: L-6.5-1

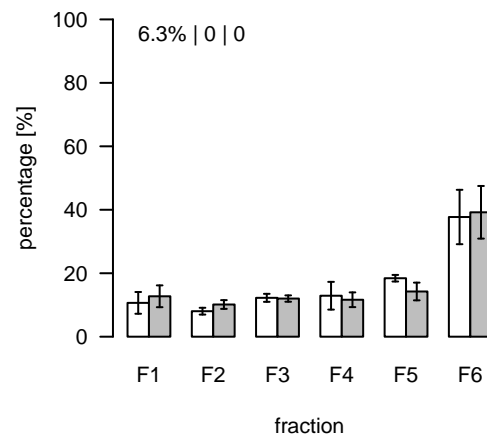

**L1073 (m/z=585.441873; rt=6.54764)**  
T/S Cluster: L-6.5-1

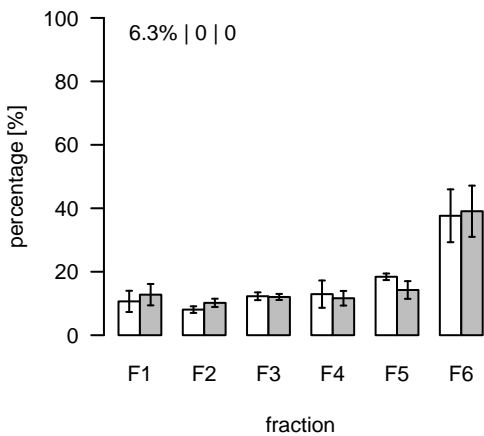

**L1061 (m/z=767.545717; rt=6.54755)**  
T/S Cluster: L-6.5-1

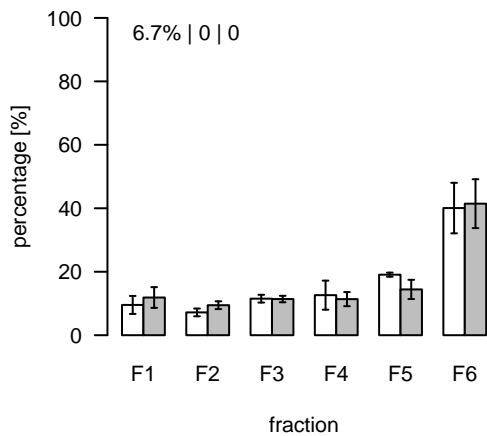

**L1071 (m/z=255.183046; rt=6.54763)**  
T/S Cluster: L-6.5-1

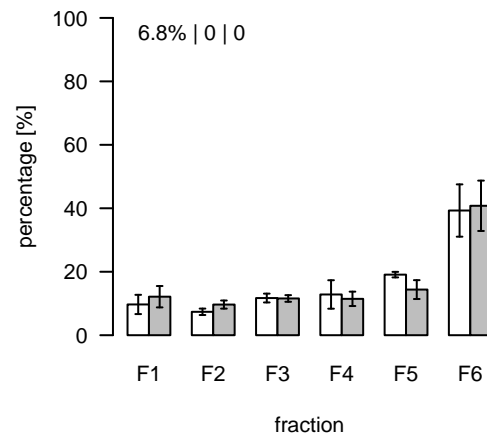

**L1055 (m/z=383.272016; rt=6.54749)**  
T/S Cluster: L-6.5-1

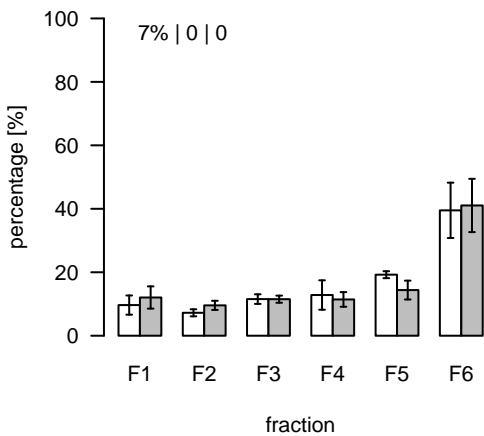

**L1072 (m/z=767.517798; rt=6.54763)**  
T/S Cluster: L-6.5-1

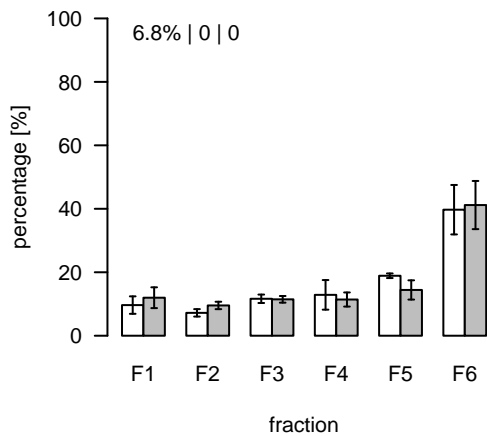

**L1086 (m/z=254.853016; rt=6.54774)**  
T/S Cluster: L-6.5-1

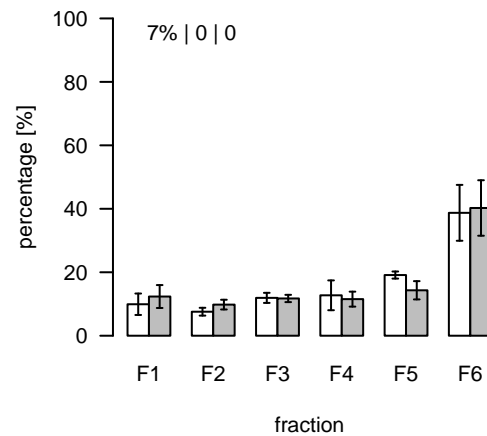

**L1067 (m/z=586.459975; rt=6.54761)**  
T/S Cluster: L-6.5-1

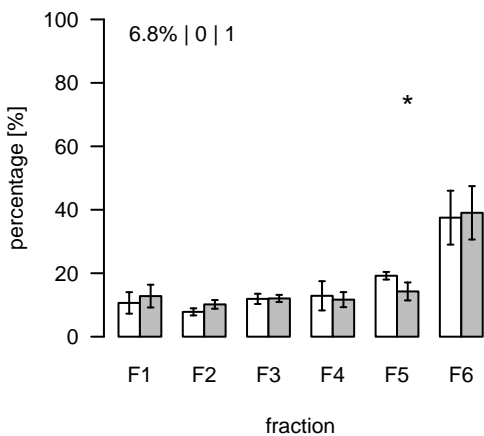

**L1076 (m/z=586.447661; rt=6.54767)**  
T/S Cluster: L-6.5-1

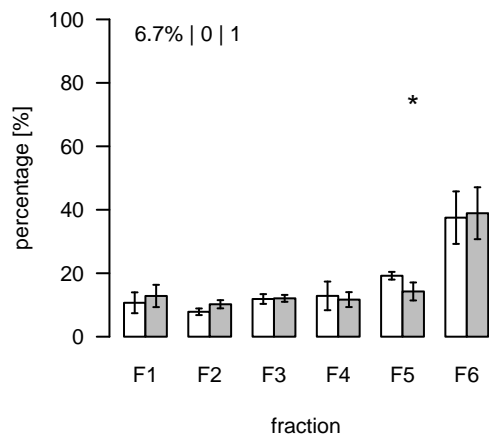

**L1078 (m/z=307.227986; rt=6.54769)**  
T/S Cluster: L-6.5-1

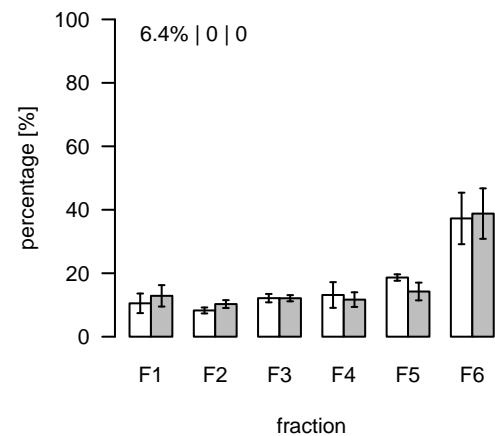

**L1089 (m/z=254.841967; rt=6.54778)**  
T/S Cluster: L-6.5-1

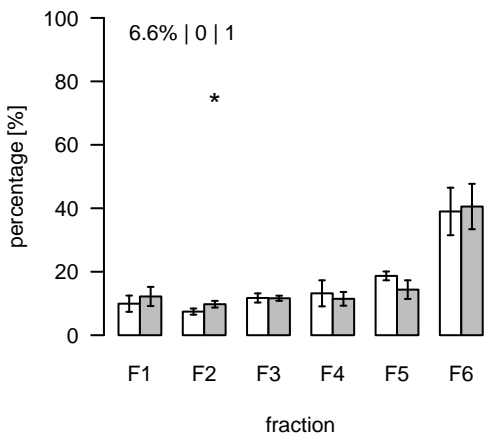

**L1091 (m/z=335.259751; rt=6.54785)**  
T/S Cluster: L-6.5-1

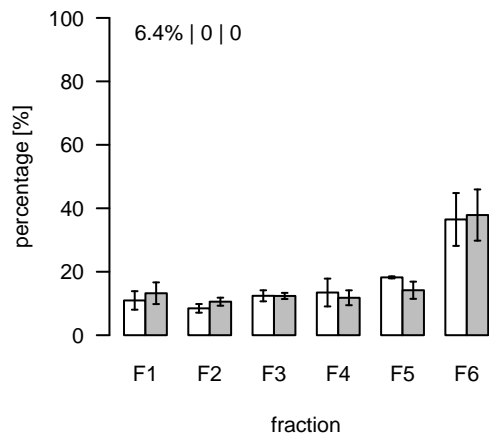

**L1019 (m/z=928.605472; rt=6.49641)**  
T/S Cluster: L-6.5-1

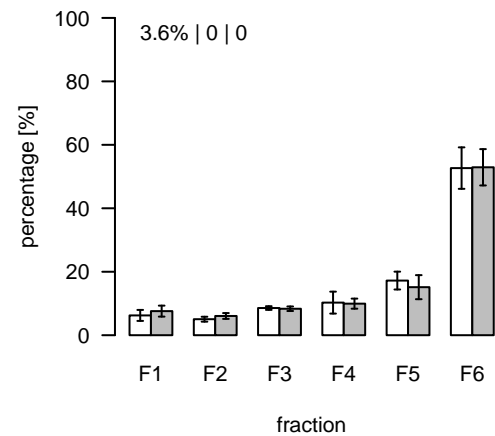

**L1094 (m/z=335.255405; rt=6.54791)**  
T/S Cluster: L-6.5-1

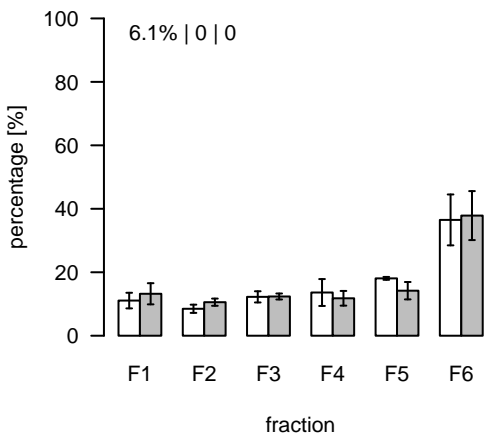

**L1083 (m/z=307.223906; rt=6.54777)**  
T/S Cluster: L-6.5-1

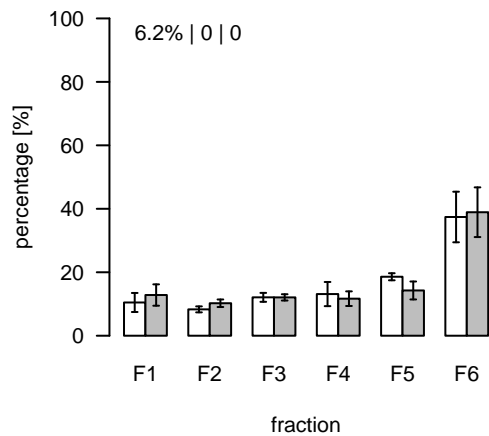

**L1018 (m/z=928.574673; rt=6.49547)**  
T/S Cluster: L-6.5-1

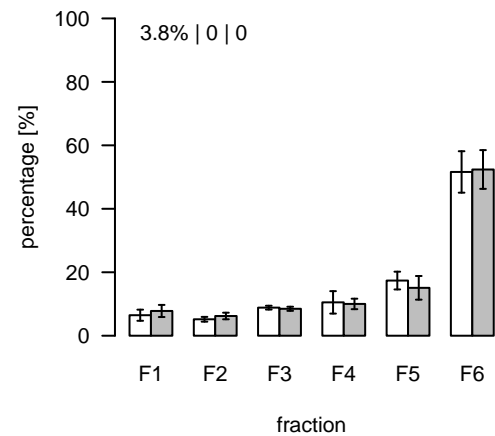

**L1051 (m/z=255.517725; rt=6.5474)**  
T/S Cluster: L-6.5-1

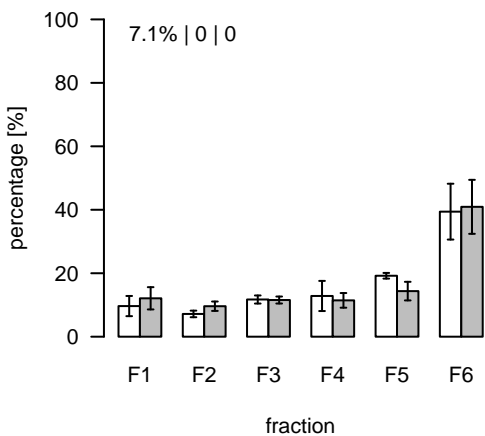

**L1090 (m/z=191.133703; rt=6.54781)**  
T/S Cluster: L-6.5-1

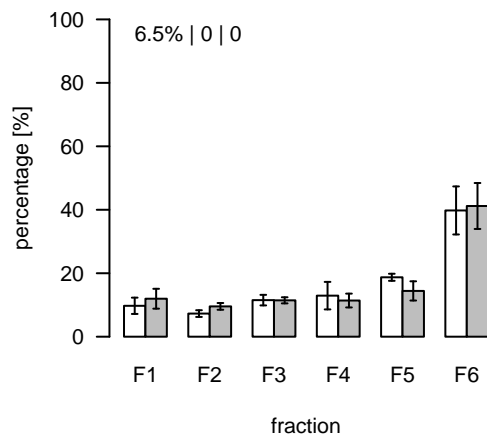

**L1065 (m/z=567.444595; rt=6.54759)**  
T/S Cluster: L-6.5-1

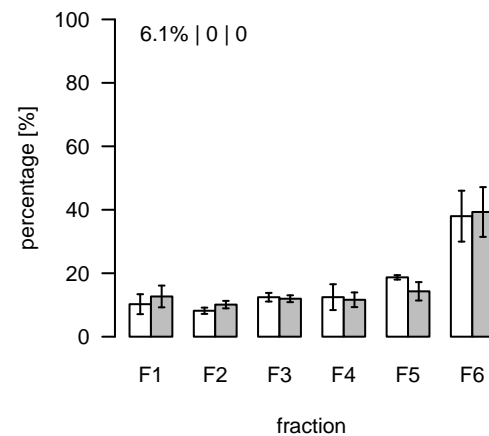

**L1020 (m/z=929.611525; rt=6.49643)**  
T/S Cluster: L-6.5-1

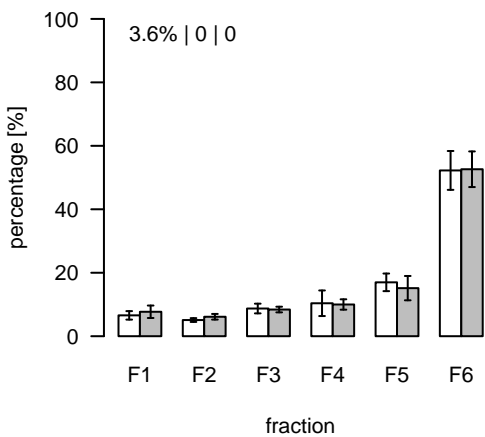

**L1081 (m/z=292.726952; rt=6.5477)**  
T/S Cluster: L-6.5-1

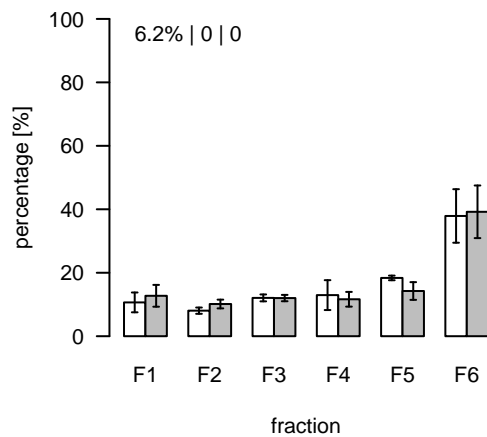

**L1060 (m/z=292.730389; rt=6.54755)**  
T/S Cluster: L-6.5-1

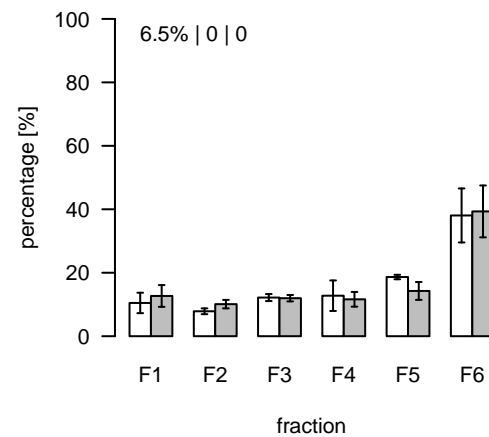

**L1080 (m/z=191.137116; rt=6.54769)**  
T/S Cluster: L-6.5-1

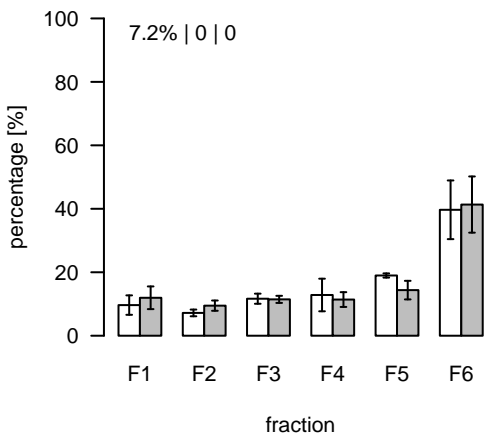

**L1069 (m/z=255.188646; rt=6.54762)**  
T/S Cluster: L-6.5-1

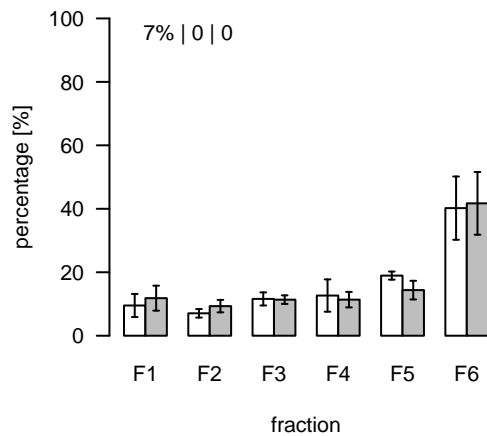

**L1017 (m/z=929.578391; rt=6.49536)**  
T/S Cluster: L-6.5-1

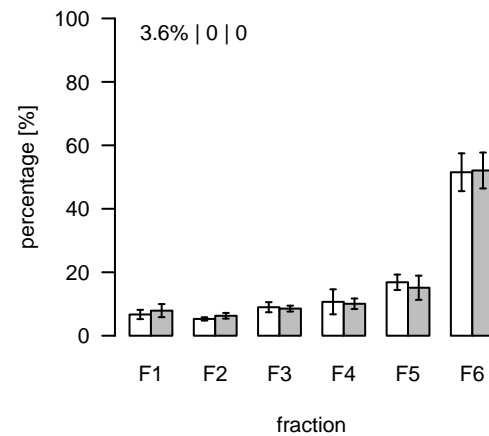

**L1058 (m/z=567.431401; rt=6.54754)**  
T/S Cluster: L-6.5-1

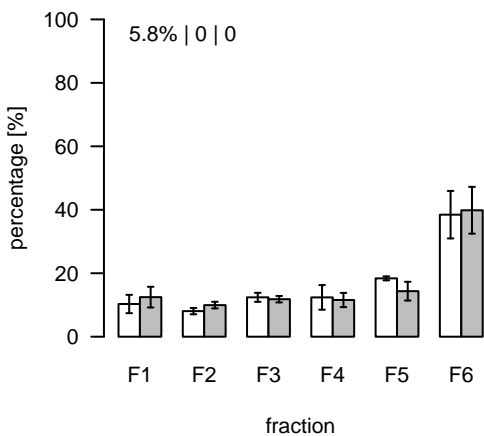

**L1084 (m/z=255.175496; rt=6.54772)**  
T/S Cluster: L-6.5-1

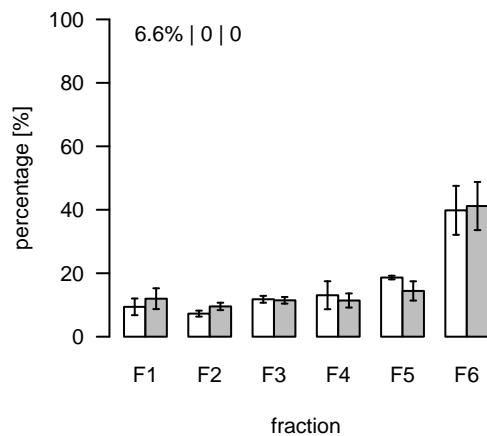

**L1052 (m/z=768.547637; rt=6.5474)**  
T/S Cluster: L-6.5-1

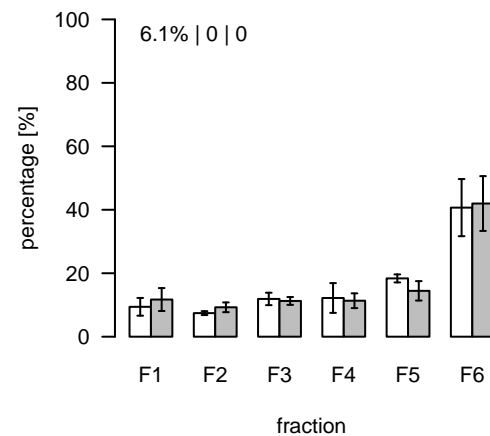

**L1075 (m/z=152.908581; rt=6.54766)**  
T/S Cluster: L-6.5-1

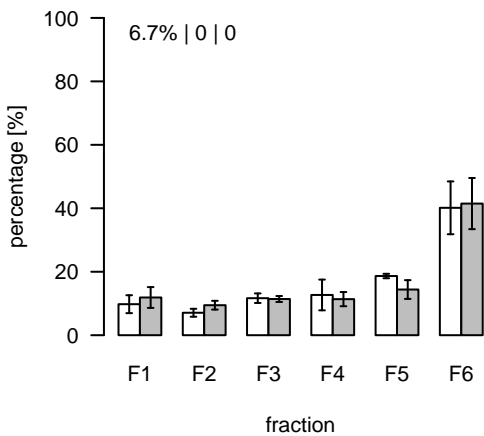

**L1064 (m/z=587.461397; rt=6.54758)**  
T/S Cluster: L-6.5-1

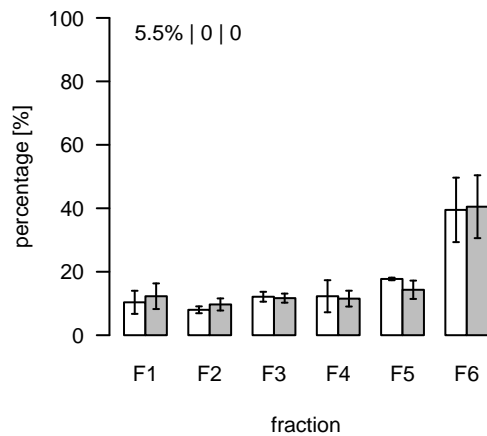

**L1050 (m/z=383.77205; rt=6.54734)**  
T/S Cluster: L-6.5-1

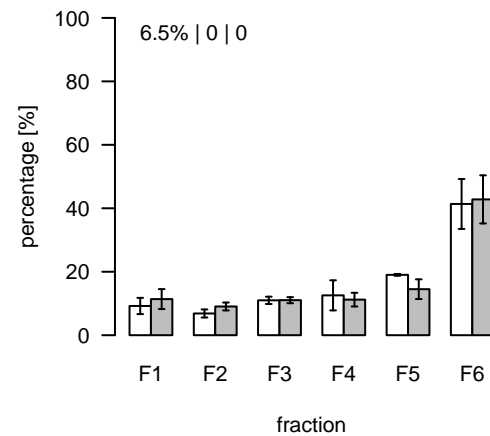

**L1053 (m/z=383.259283; rt=6.54742)**  
T/S Cluster: L-6.5-1

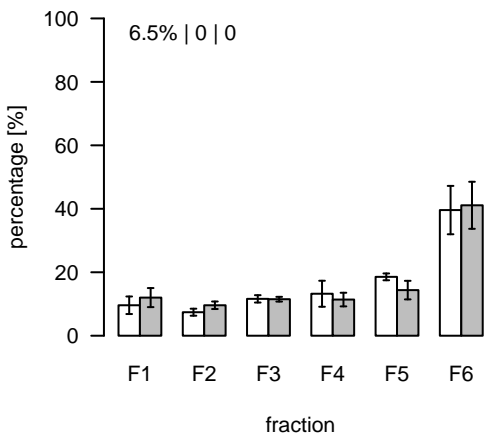

**L1092 (m/z=336.262458; rt=6.54787)**  
T/S Cluster: L-6.5-1

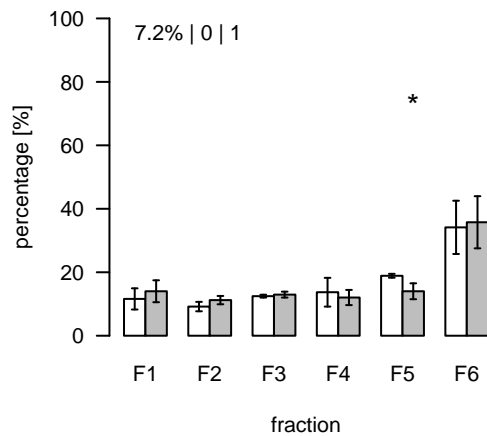

**L1049 (m/z=383.777847; rt=6.54724)**  
T/S Cluster: L-6.5-1

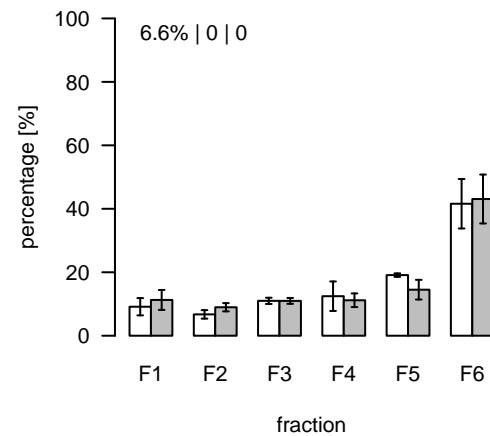

**L1082 (m/z=382.245092; rt=6.5477)**  
T/S Cluster: L-6.5-1

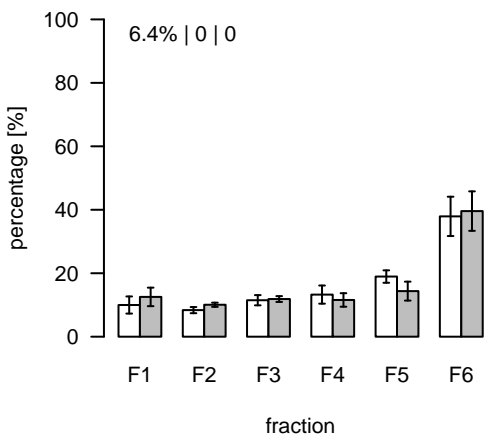

**L1095 (m/z=768.518623; rt=6.54809)**  
T/S Cluster: L-6.5-1

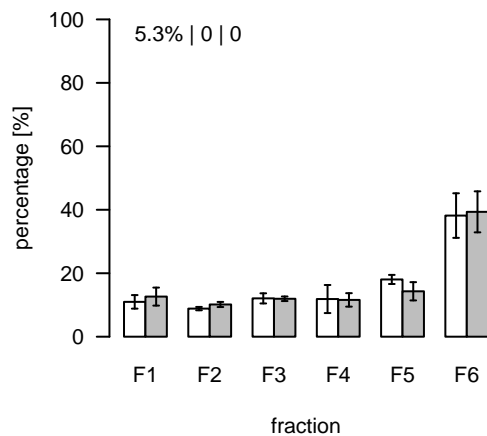

**L1079 (m/z=382.786935; rt=6.54769)**  
T/S Cluster: L-6.5-1

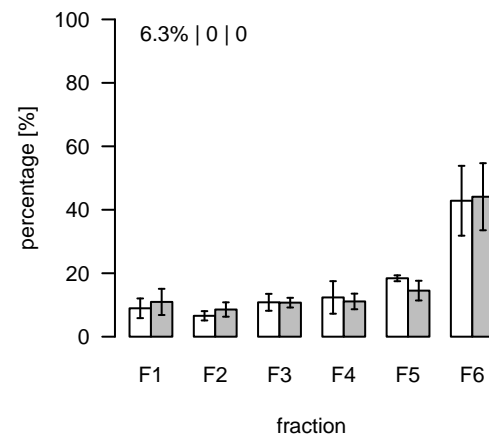

**L1074 (m/z=255.513284; rt=6.54766)**  
T/S Cluster: L-6.5-1

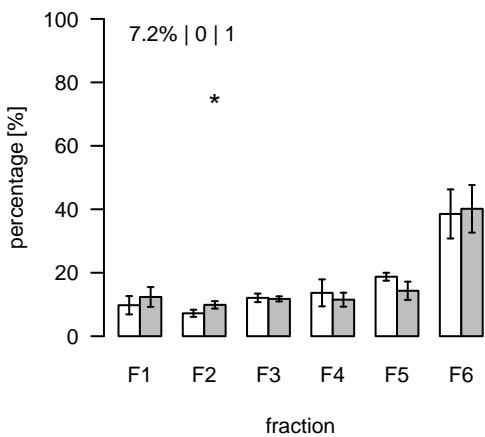

**L1097 (m/z=152.90724; rt=6.54818)**  
T/S Cluster: L-6.5-1

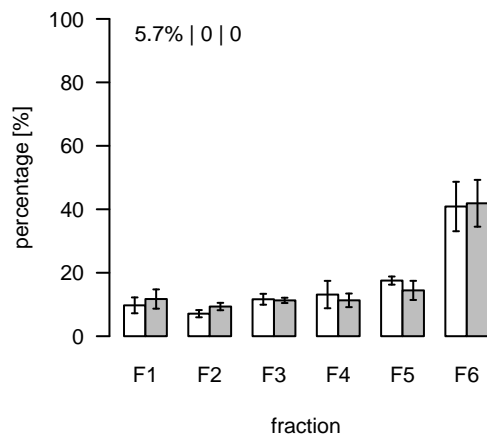

**L1096 (m/z=765.636992; rt=6.54815)**  
T/S Cluster: L-6.5-1

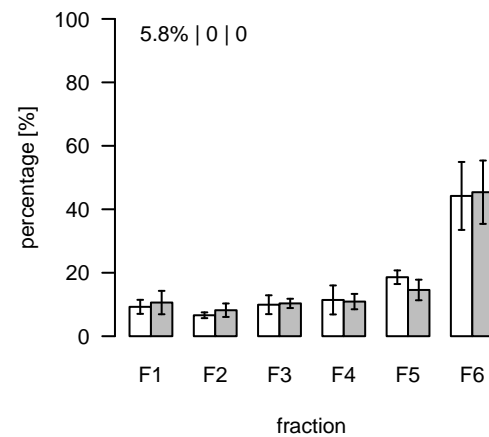

**L1056 (m/z=191.384475; rt=6.54751)**  
T/S Cluster: L-6.5-1

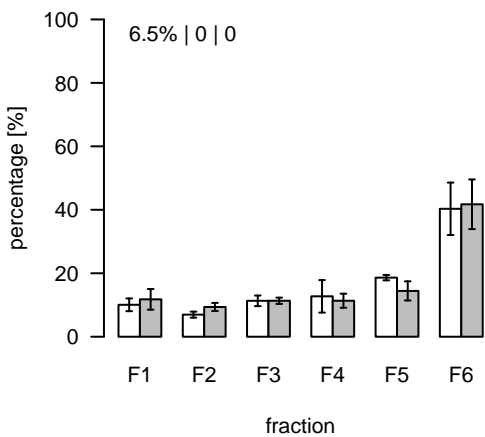

**L1093 (m/z=233.190407; rt=6.54789)**  
T/S Cluster: L-6.5-1

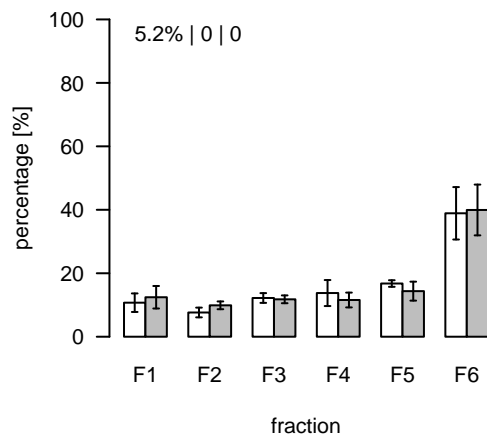

**L1048 (m/z=191.388002; rt=6.54717)**  
T/S Cluster: L-6.5-1

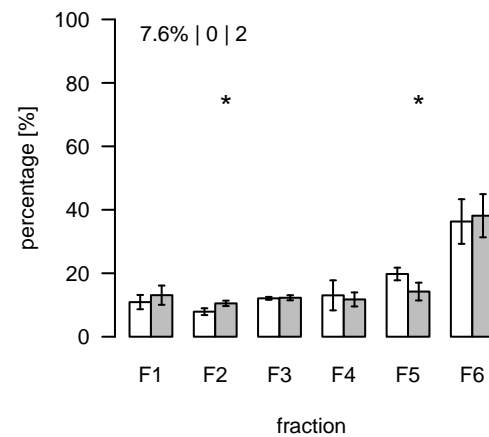

**L1098 (m/z=382.748376; rt=6.54819)**  
T/S Cluster: L-6.5-1

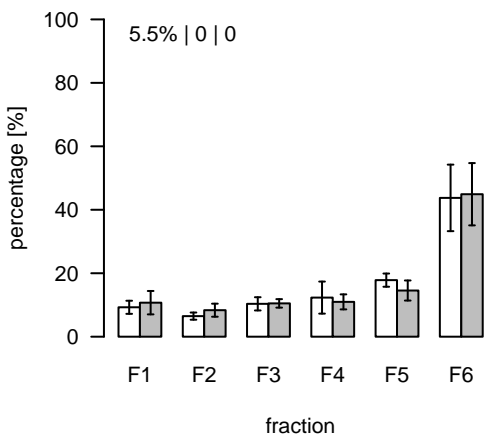

**L1100 (m/z=568.449131; rt=6.54903)**  
T/S Cluster: L-6.5-1

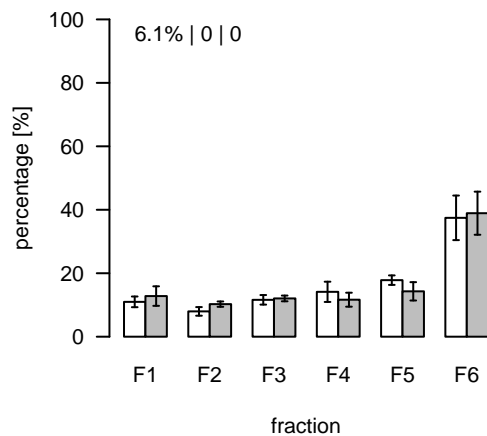

**L1102 (m/z=568.439154; rt=6.54958)**  
T/S Cluster: L-6.5-1

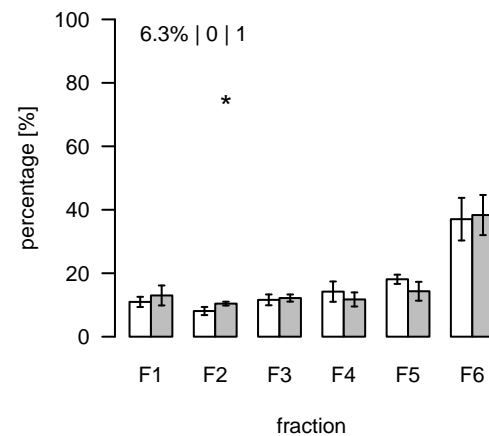

**L1077 (m/z=308.231118; rt=6.54767)**  
T/S Cluster: L-6.5-1

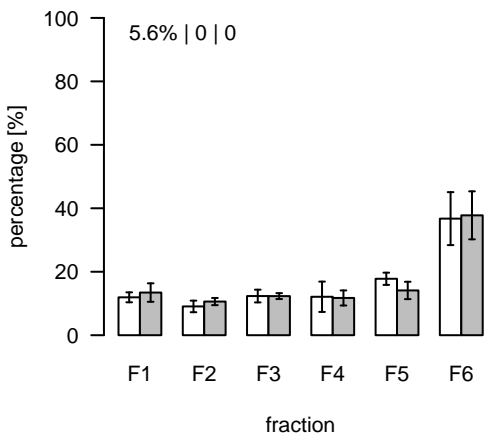

**L1022 (m/z=752.527978; rt=6.52324)**  
T/S Cluster: L-6.5-2

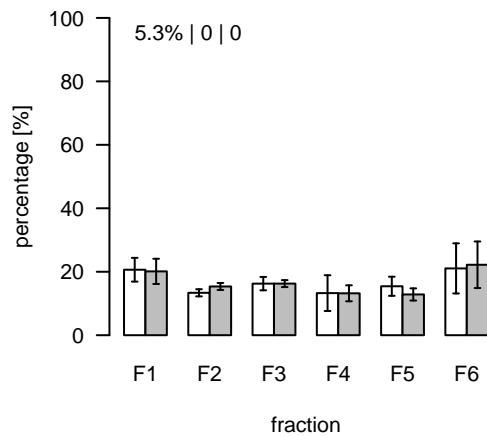

**L1021 (m/z=753.530544; rt=6.52299)**  
T/S Cluster: L-6.5-2

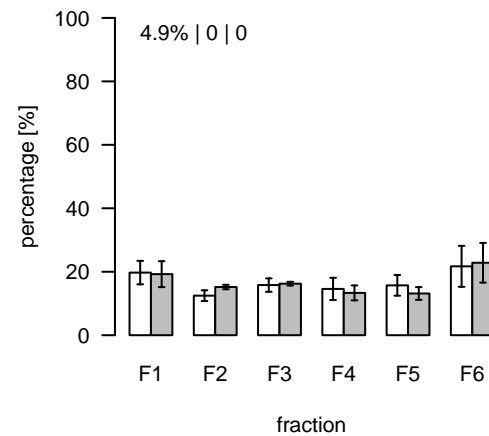

**L1026 (m/z=798.573605; rt=6.52824)**  
T/S Cluster: L-6.5-3

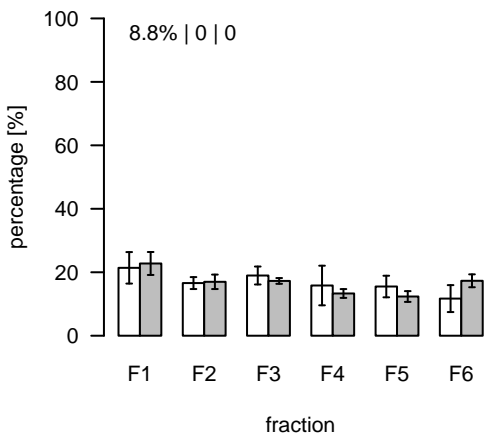

**L1024 (m/z=798.549167; rt=6.5262)**  
T/S Cluster: L-6.5-3

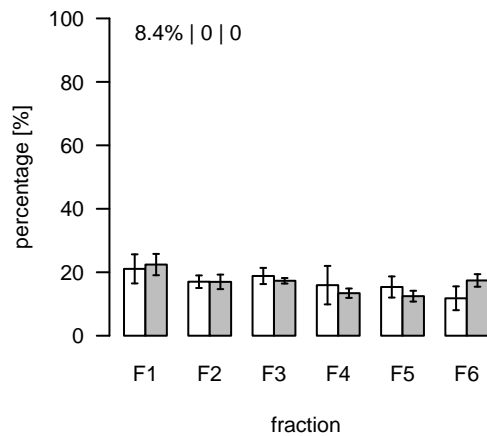

**L1027 (m/z=799.578842; rt=6.5289)**  
T/S Cluster: L-6.5-3

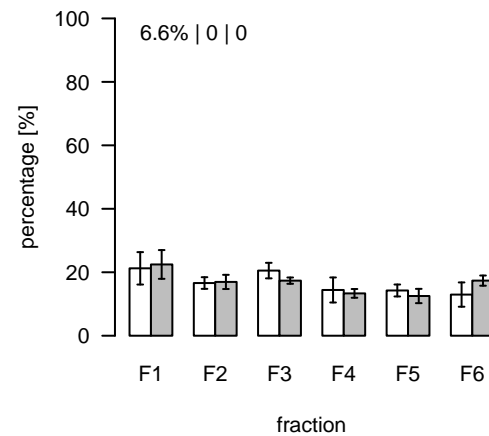

**L1025 (m/z=799.554736; rt=6.52714)**  
T/S Cluster: L-6.5-3

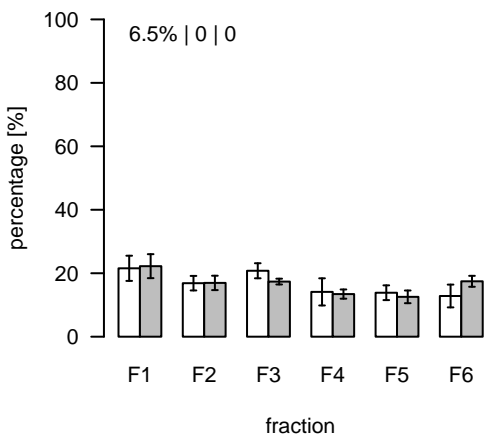

**L1023 (m/z=798.534167; rt=6.52481)**  
T/S Cluster: L-6.5-3

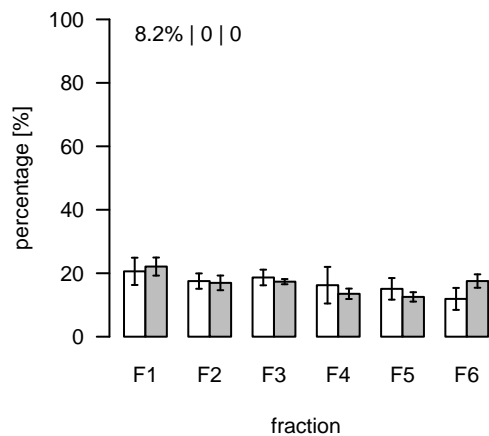

**L1028 (m/z=391.28824; rt=6.54042)**  
T/S Cluster: L-6.5-4

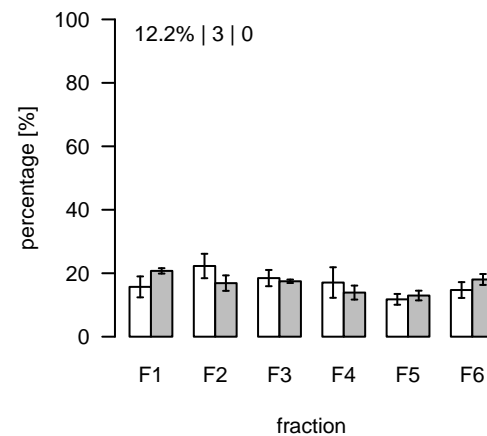

**L1029 (m/z=391.282806; rt=6.54045)**  
T/S Cluster: L-6.5-4

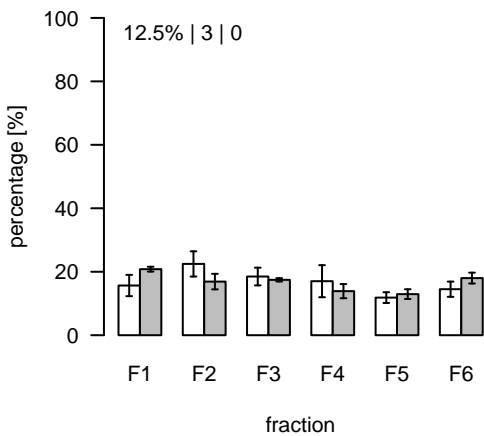

**L1054 (m/z=792.56931; rt=6.54743)**  
T/S Cluster: L-6.5-5

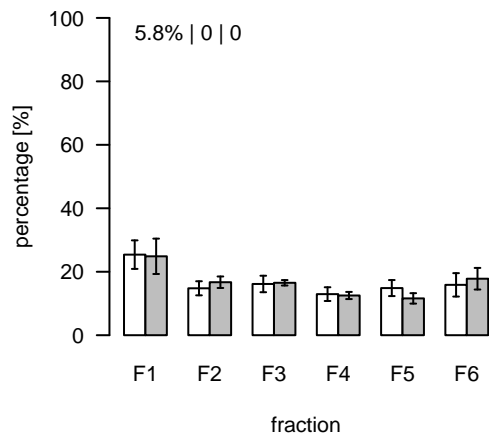

**L1031 (m/z=792.541224; rt=6.5451)**  
T/S Cluster: L-6.5-5

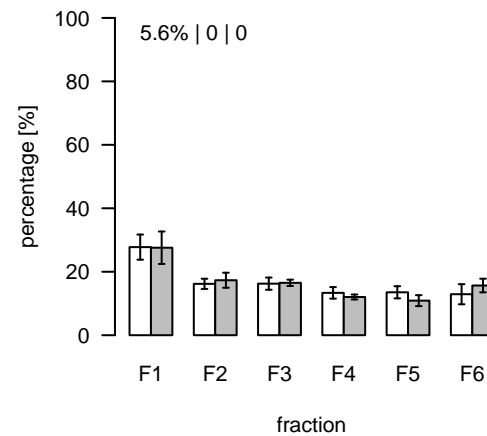

**L1046 (m/z=793.572475; rt=6.54672)**  
T/S Cluster: L-6.5-5

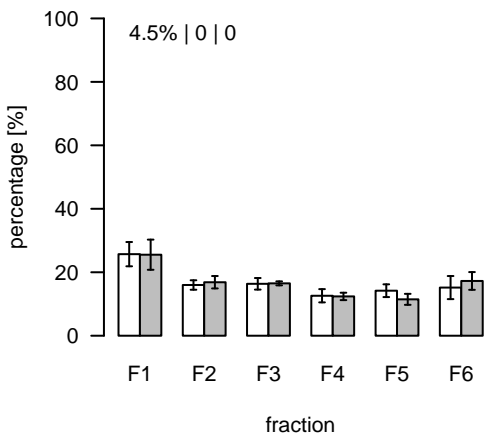

**L1037 (m/z=793.558529; rt=6.54572)**  
T/S Cluster: L-6.5-5

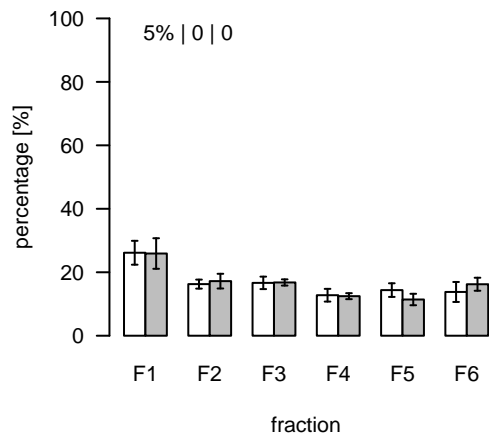

**L1042 (m/z=794.575372; rt=6.54641)**  
T/S Cluster: L-6.5-5

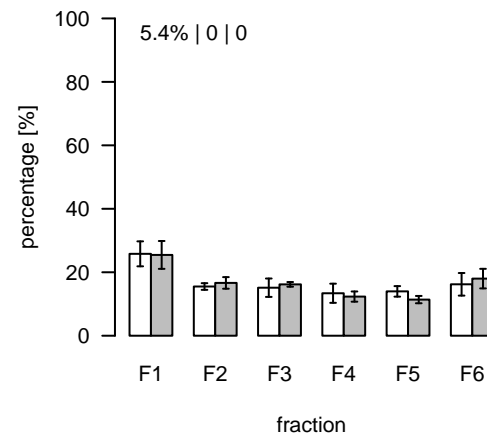

**L1040 (m/z=794.55575; rt=6.5461)**  
T/S Cluster: L-6.5-5

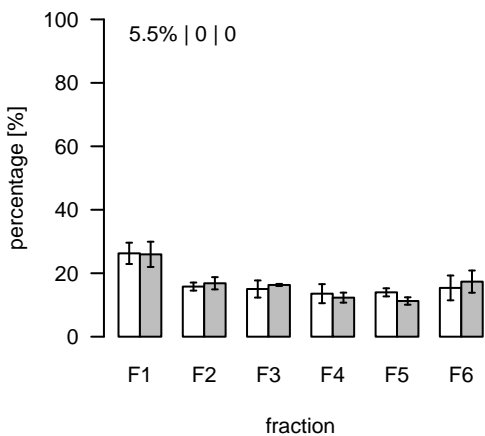

**L1044 (m/z=396.284479; rt=6.54649)**  
T/S Cluster: L-6.5-5

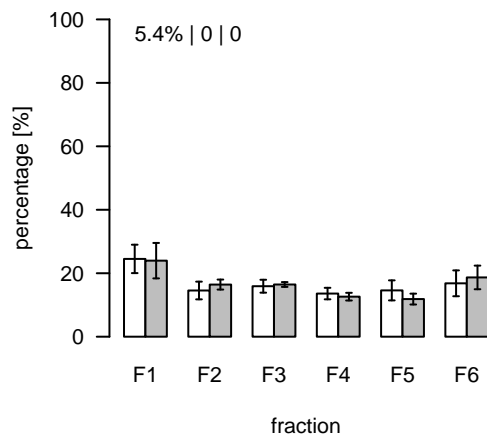

**L1030 (m/z=792.505135; rt=6.54336)**  
T/S Cluster: L-6.5-5

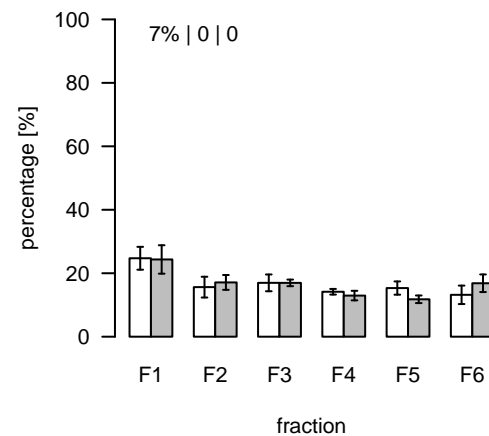

**L1036 (m/z=769.475171; rt=6.54562)**  
T/S Cluster: L-6.5-6

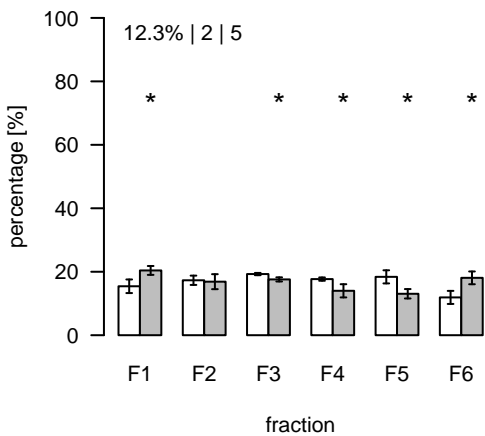

**L1038 (m/z=769.495591; rt=6.54578)**  
T/S Cluster: L-6.5-6

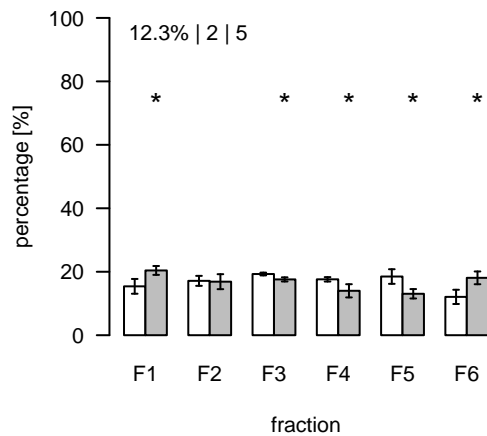

**L1032 (m/z=770.494275; rt=6.54515)**  
T/S Cluster: L-6.5-6

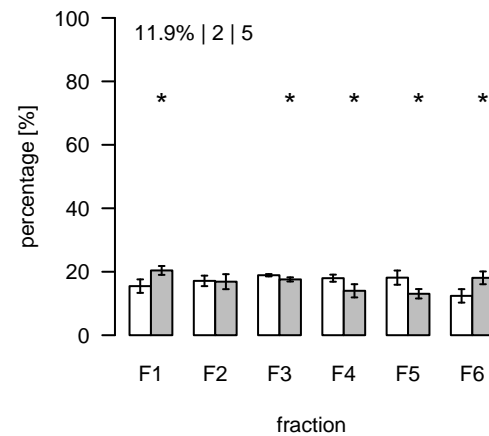

**L1035 (m/z=384.744993; rt=6.54561)**  
T/S Cluster: L-6.5-6

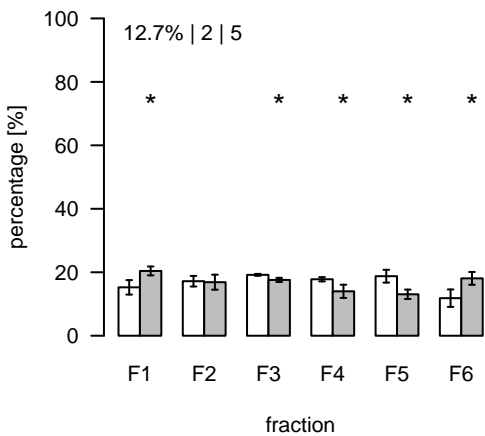

**L1034 (m/z=771.497981; rt=6.54545)**  
T/S Cluster: L-6.5-6

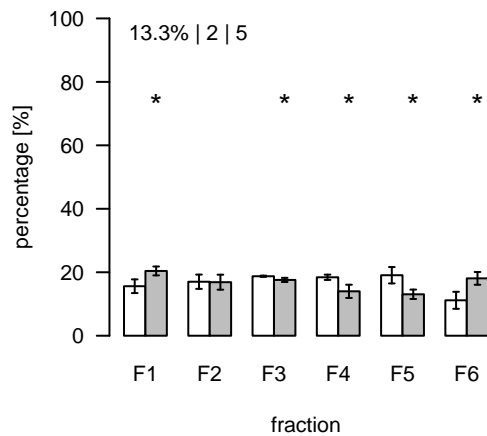

**L1039 (m/z=384.751033; rt=6.54588)**  
T/S Cluster: L-6.5-6

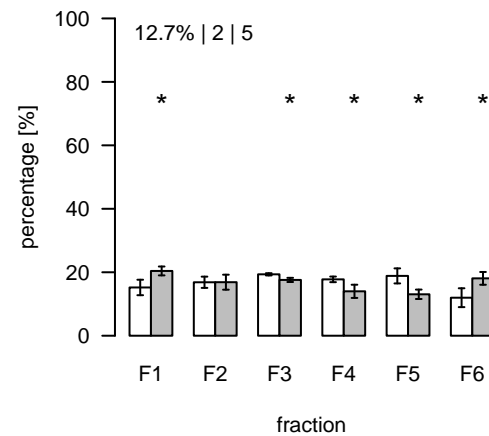



**L1033 (m/z=385.248206; rt=6.54517)**  
T/S Cluster: L-6.5-6

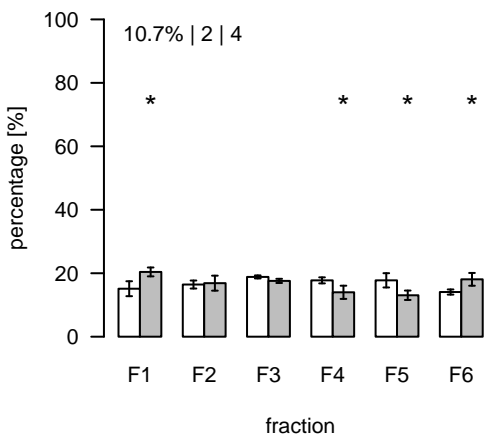

**L1043 (m/z=256.500666; rt=6.54642)**  
T/S Cluster: L-6.5-6

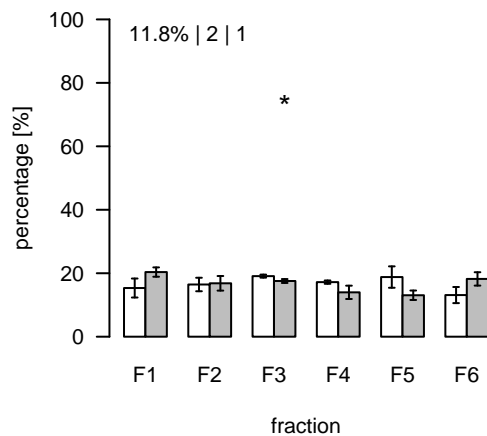

**L1041 (m/z=785.465201; rt=6.54623)**  
T/S Cluster: L-6.5-7

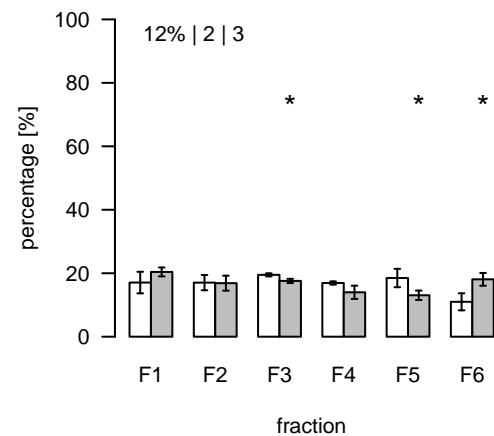

**L1045 (m/z=786.468917; rt=6.54666)**  
T/S Cluster: L-6.5-7

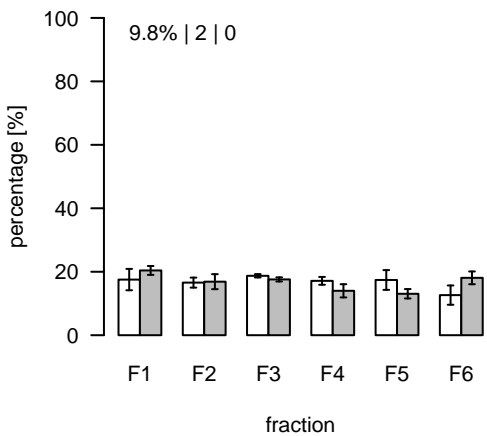

**L1047 (m/z=787.469963; rt=6.54706)**  
T/S Cluster: L-6.5-8

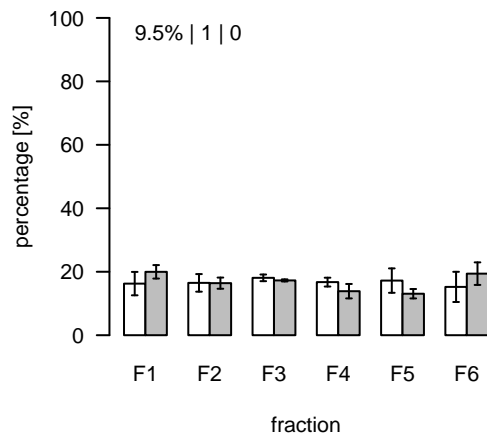

**L1059 (m/z=806.561778; rt=6.54755)**  
T/S Cluster: L-6.5-9

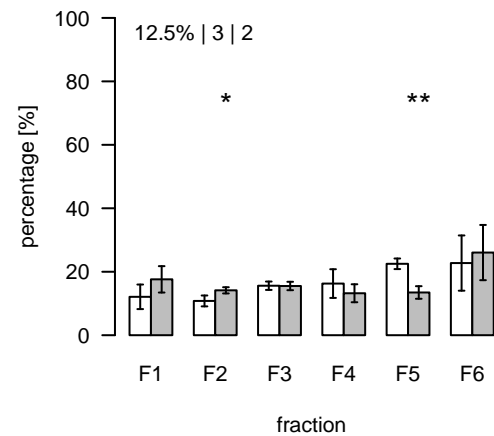

**L1063 (m/z=806.561732; rt=6.54756)**  
T/S Cluster: L-6.5-9

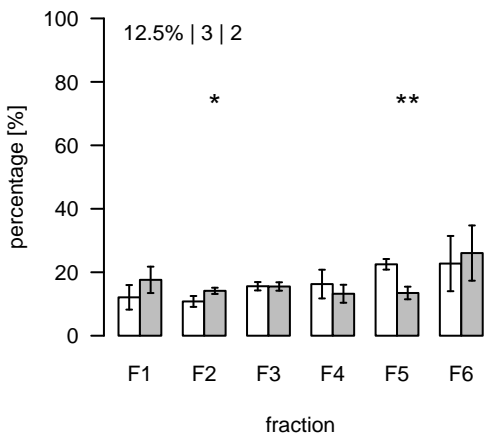

**L1099 (m/z=805.563214; rt=6.549)**  
T/S Cluster: L-6.5-9

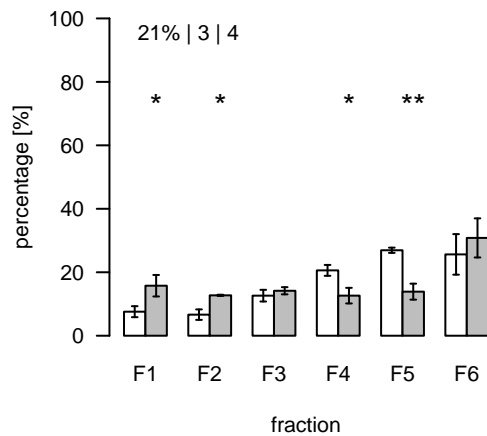

**L1101 (m/z=806.526737; rt=6.54913)**  
T/S Cluster: L-6.5-10

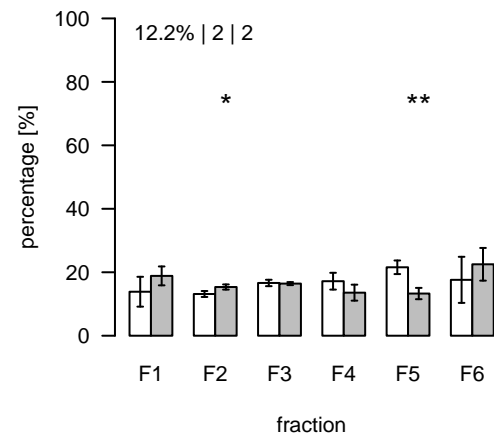

**L1103 (m/z=772.511095; rt=6.55532)**  
T/S Cluster: L-6.6-1

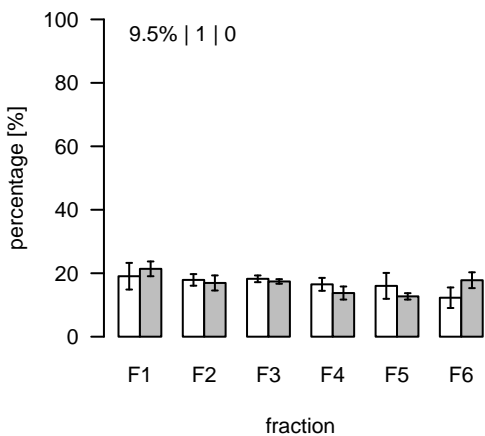

**L1104 (m/z=437.745075; rt=6.56583)**  
T/S Cluster: L-6.6-2

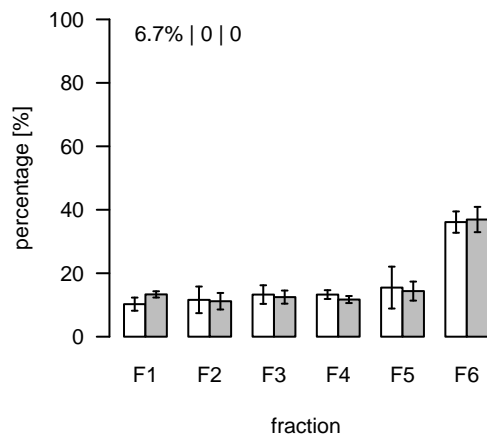

**L1105 (m/z=388.341144; rt=6.56646)**  
T/S Cluster: L-6.6-3

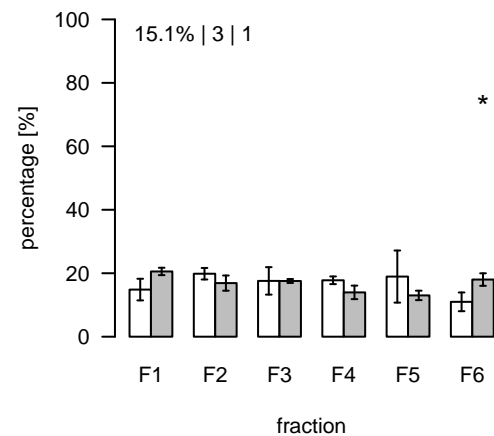

**L1107 (m/z=388.345121; rt=6.56953)**  
T/S Cluster: L-6.6-3

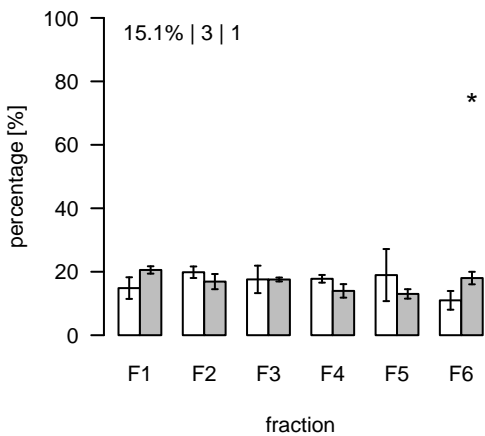

**L1106 (m/z=800.587099; rt=6.56825)**  
T/S Cluster: L-6.6-4

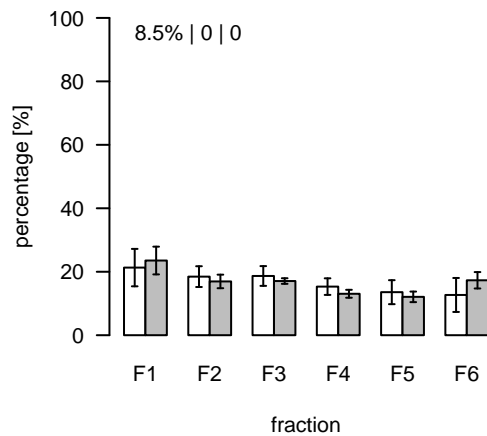

**L1109 (m/z=801.587851; rt=6.58541)**  
T/S Cluster: L-6.6-4

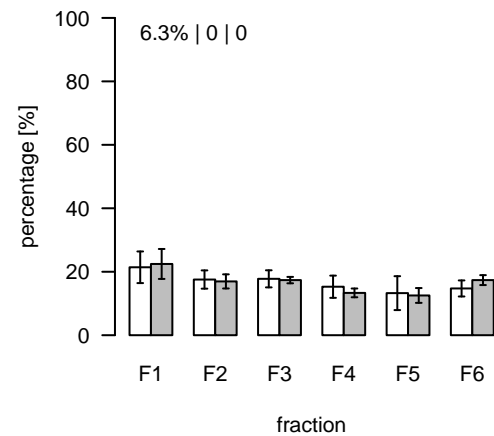

**L1108 (m/z=772.554975; rt=6.57071)**  
T/S Cluster: L-6.6-5

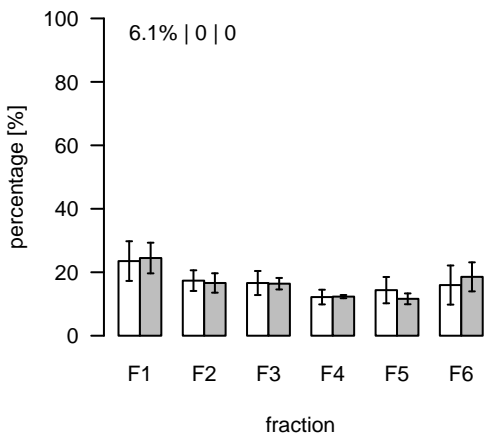

**L1110 (m/z=802.601429; rt=6.59462)**  
T/S Cluster: L-6.6-6

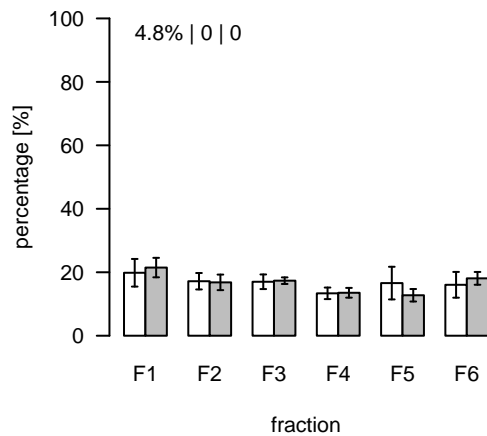

**L1114 (m/z=941.533861; rt=6.59733)**  
T/S Cluster: L-6.6-7

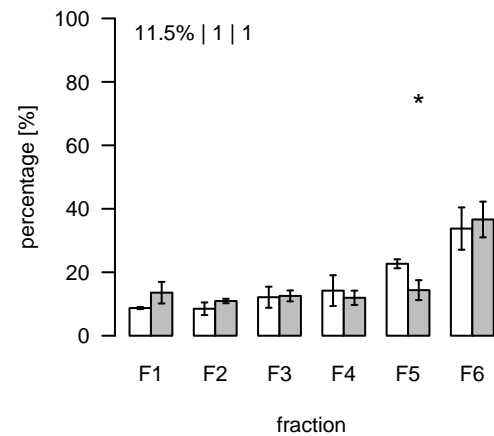

**L1111 (m/z=942.537048; rt=6.5958)**  
T/S Cluster: L-6.6-7

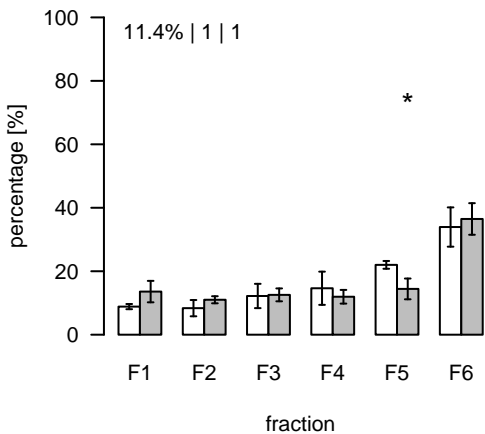

**L1113 (m/z=942.537002; rt=6.59725)**  
T/S Cluster: L-6.6-7

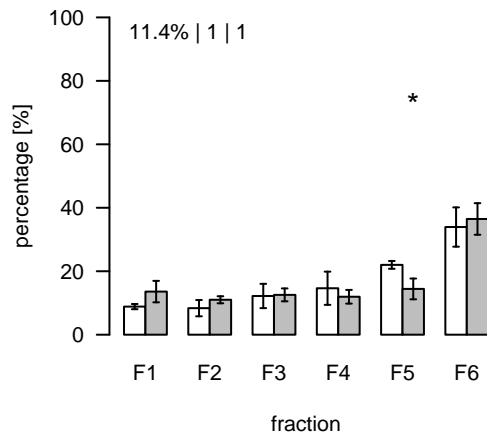

**L1112 (m/z=941.584811; rt=6.596)**  
T/S Cluster: L-6.6-7

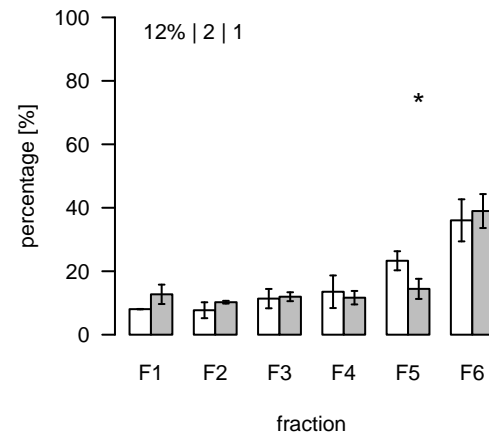

**L1115 (m/z=952.66427; rt=6.60482)**  
T/S Cluster: L-6.6-8

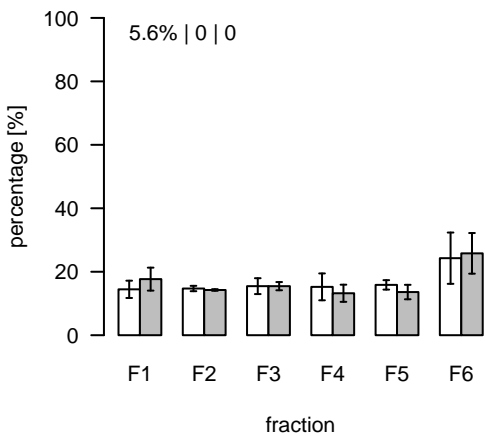

**L1116 (m/z=837.559152; rt=6.60772)**  
T/S Cluster: L-6.6-9

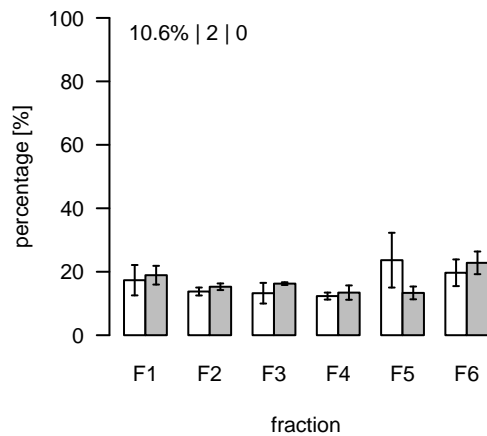

**L1117 (m/z=477.813741; rt=6.61326)**  
T/S Cluster: L-6.6-10

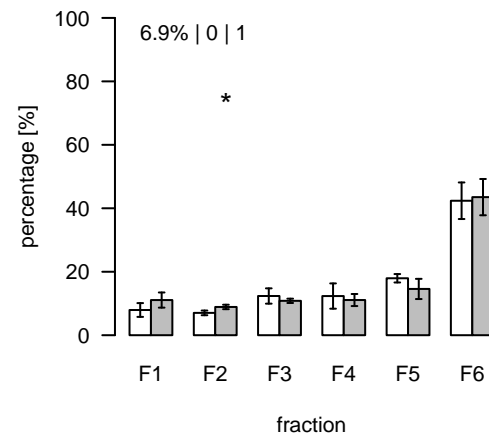

**L1118 (m/z=953.659222; rt=6.61367)**  
T/S Cluster: L-6.6-11

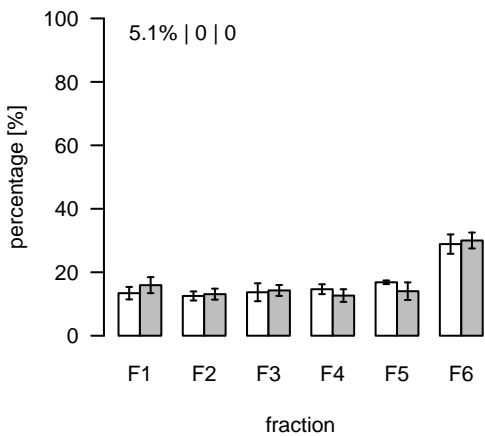

**L1121 (m/z=953.626375; rt=6.63012)**  
T/S Cluster: L-6.6-11

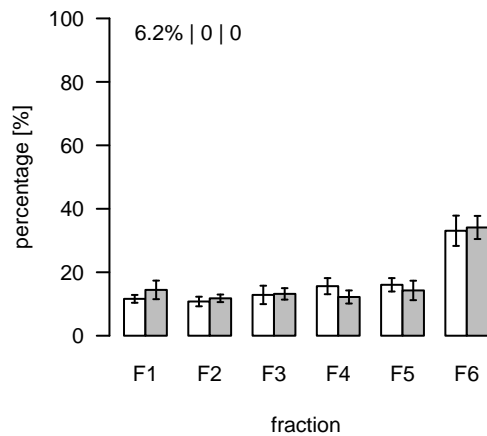

**L1127 (m/z=834.545911; rt=6.6332)**  
T/S Cluster: L-6.6-12

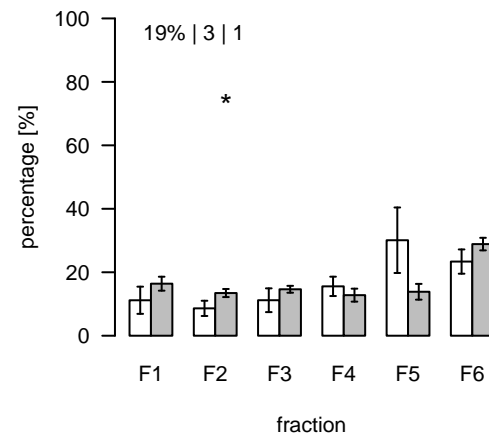

**L1137 (m/z=760.517602; rt=6.64237)**  
T/S Cluster: L-6.6-12

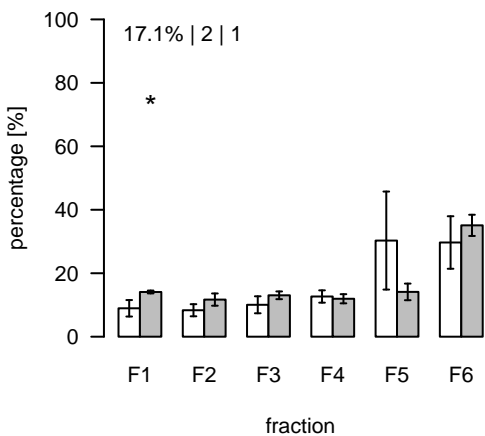

**L1124 (m/z=834.519532; rt=6.6325)**  
T/S Cluster: L-6.6-12

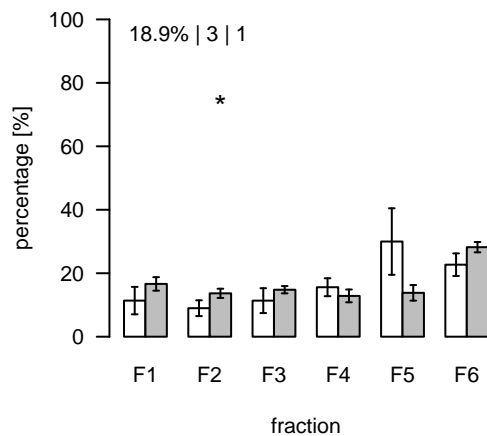

**L1126 (m/z=835.55; rt=6.63308)**  
T/S Cluster: L-6.6-12

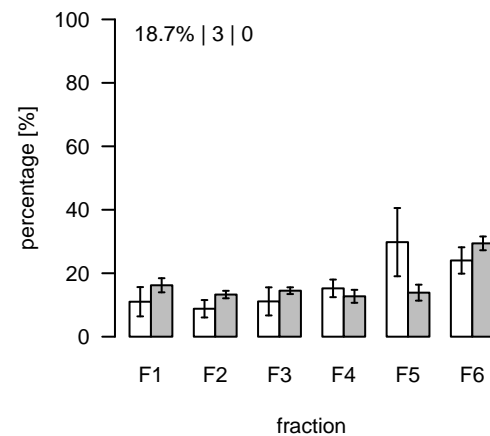

**L1136 (m/z=761.521558; rt=6.6422)**  
T/S Cluster: L-6.6-12

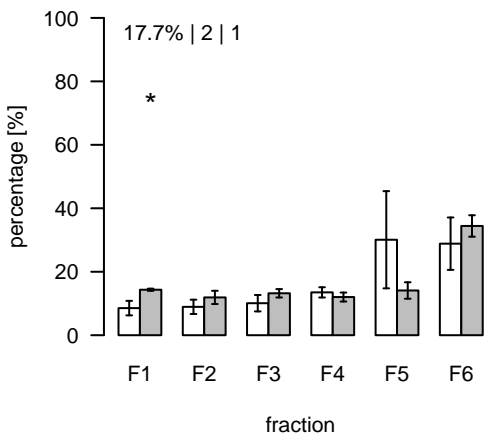

**L1133 (m/z=761.499771; rt=6.64175)**  
T/S Cluster: L-6.6-12

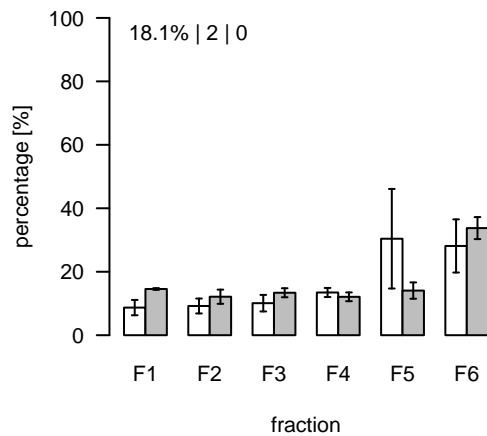

**L1123 (m/z=835.517989; rt=6.63203)**  
T/S Cluster: L-6.6-12

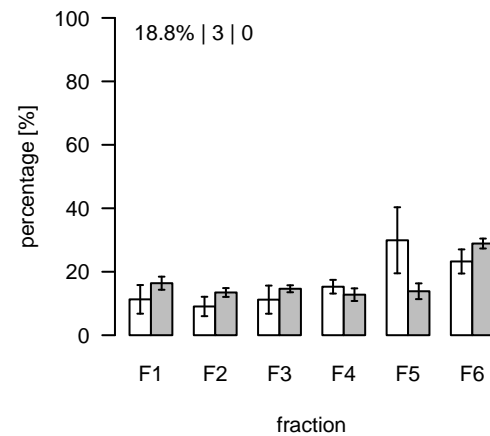

**L1134 (m/z=760.474494; rt=6.64186)**  
T/S Cluster: L-6.6-12

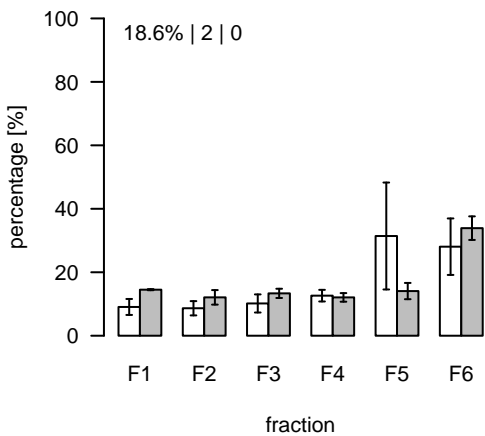

**L1119 (m/z=836.552356; rt=6.62414)**  
T/S Cluster: L-6.6-12

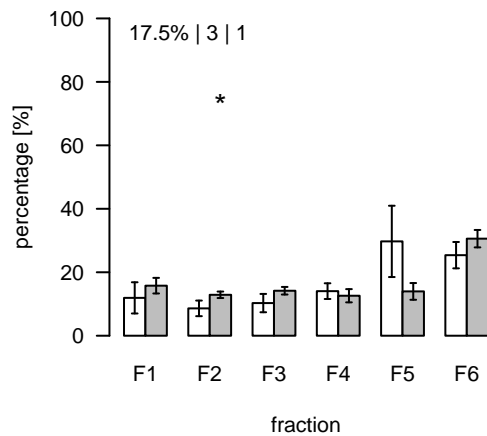

**L1135 (m/z=380.258142; rt=6.64209)**  
T/S Cluster: L-6.6-12

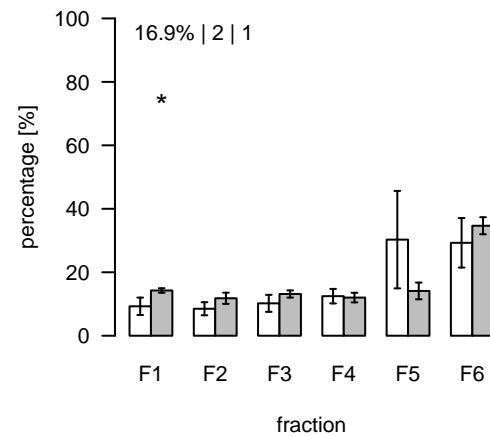

**L1138 (m/z=380.261631; rt=6.64252)**  
T/S Cluster: L-6.6-12

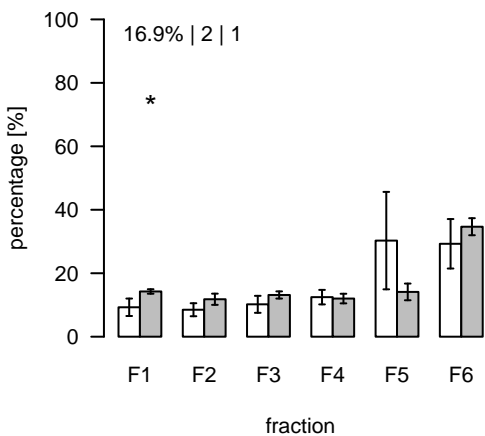

**L1131 (m/z=762.525136; rt=6.64125)**  
T/S Cluster: L-6.6-12

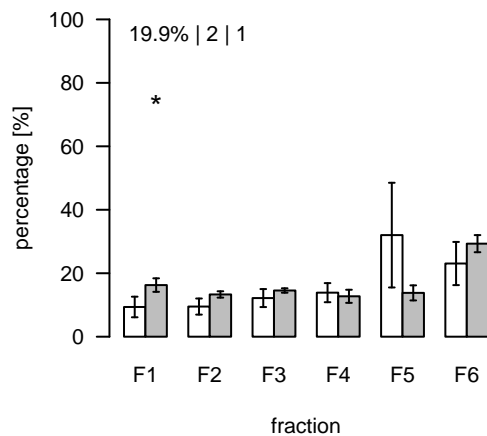

**L1122 (m/z=417.272226; rt=6.63172)**  
T/S Cluster: L-6.6-12

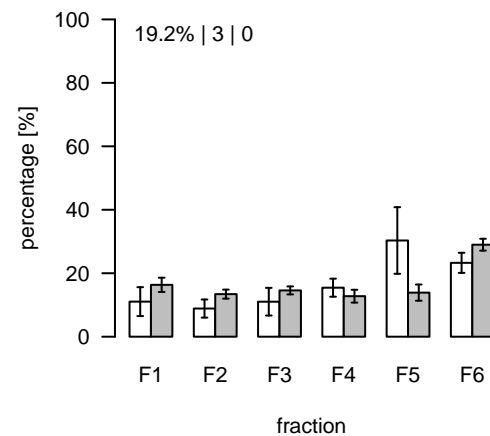

**L1128 (m/z=417.274093; rt=6.64018)**  
T/S Cluster: L-6.6-12

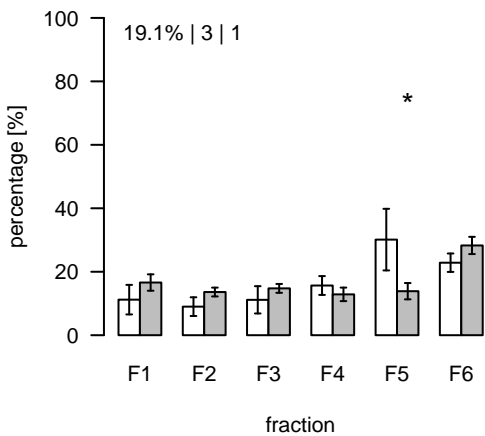

**L1125 (m/z=417.278674; rt=6.63271)**  
T/S Cluster: L-6.6-12

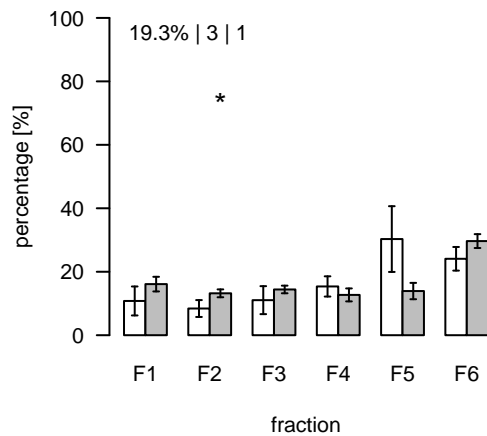

**L1129 (m/z=762.500246; rt=6.64051)**  
T/S Cluster: L-6.6-12

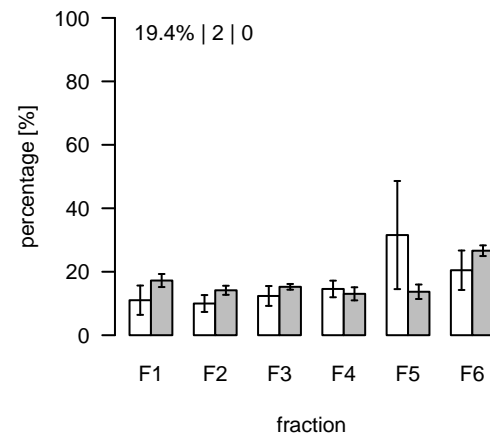

**L1120 (m/z=417.775577; rt=6.63005)**  
T/S Cluster: L-6.6-12

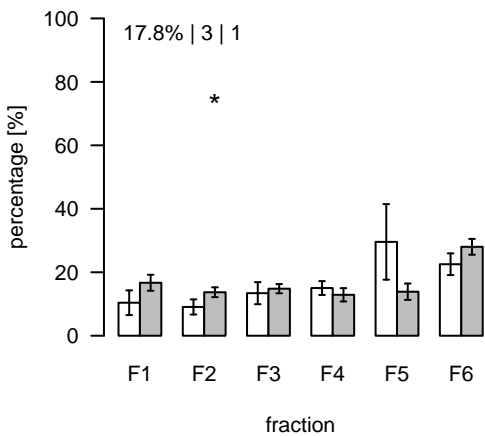

**L1132 (m/z=571.475714; rt=6.64163)**  
T/S Cluster: L-6.6-12

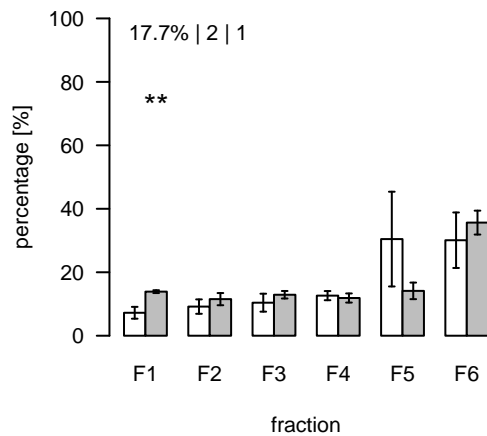

**L1139 (m/z=571.475379; rt=6.64443)**  
T/S Cluster: L-6.6-12

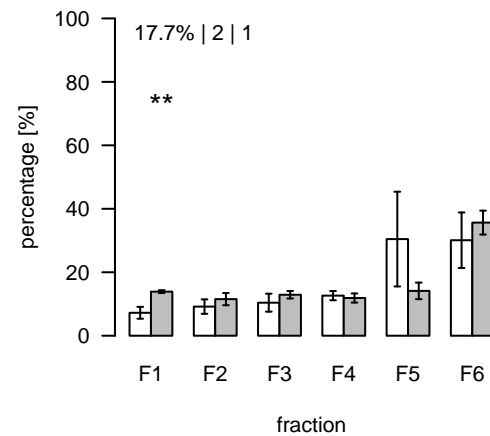

**L1130 (m/z=571.462314; rt=6.64095)**  
T/S Cluster: L-6.6-12

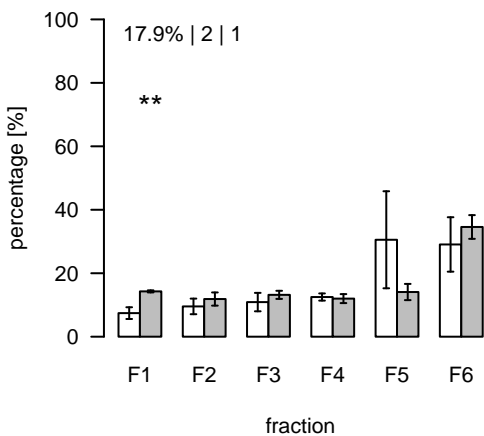

**L1140 (m/z=982.602641; rt=6.64963)**  
T/S Cluster: L-6.6-13

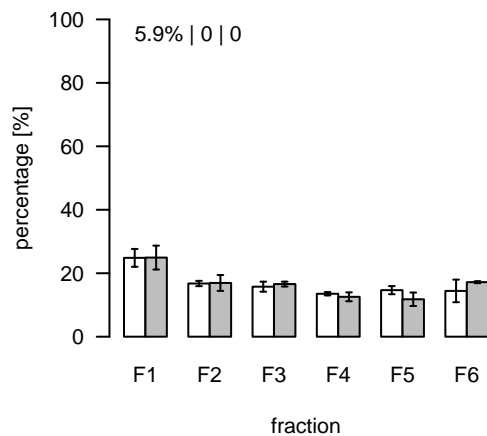

**L1142 (m/z=982.657666; rt=6.65225)**  
T/S Cluster: L-6.7-1

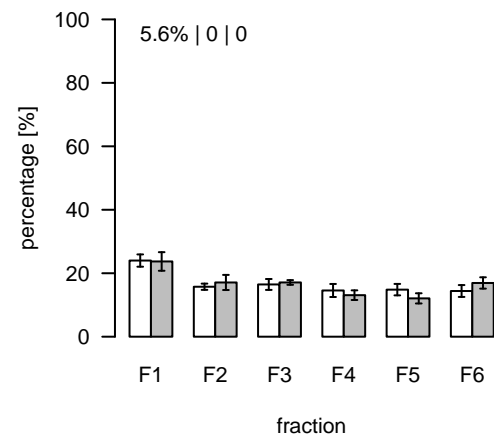

**L1143 (m/z=983.661664; rt=6.65238)**  
T/S Cluster: L-6.7-1

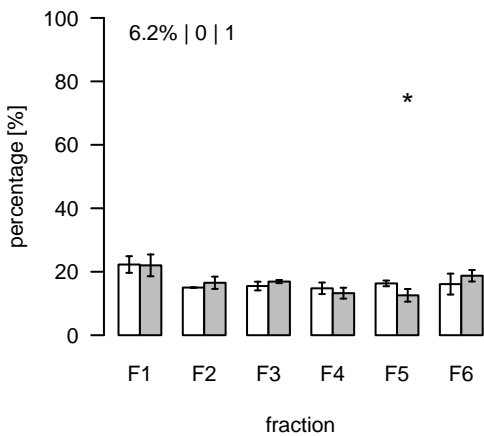

**L1141 (m/z=983.629342; rt=6.65115)**  
T/S Cluster: L-6.7-1

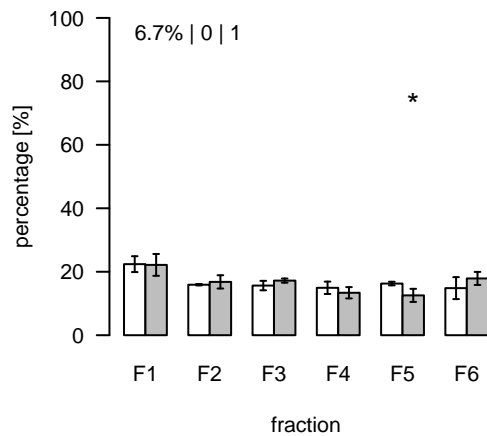

**L1144 (m/z=335.259775; rt=6.6527)**  
T/S Cluster: L-6.7-2

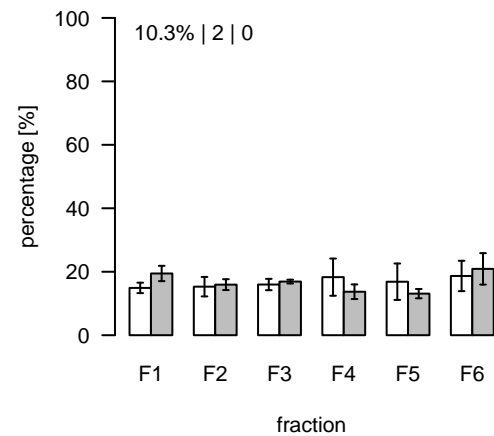

**L1164 (m/z=954.620615; rt=6.65428)**  
T/S Cluster: L-6.7-3

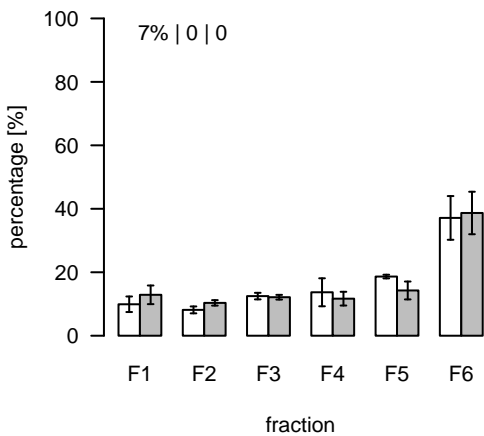

**L1159 (m/z=955.624378; rt=6.65422)**  
T/S Cluster: L-6.7-3

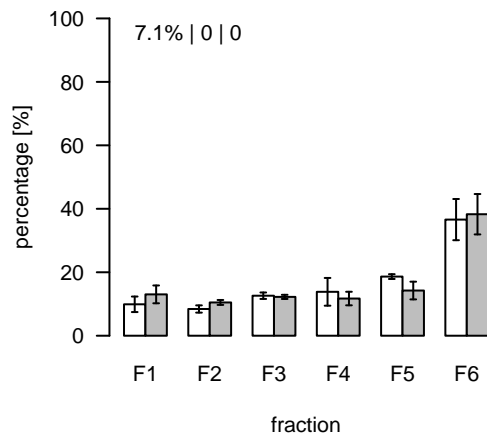

**L1153 (m/z=956.628268; rt=6.65413)**  
T/S Cluster: L-6.7-3

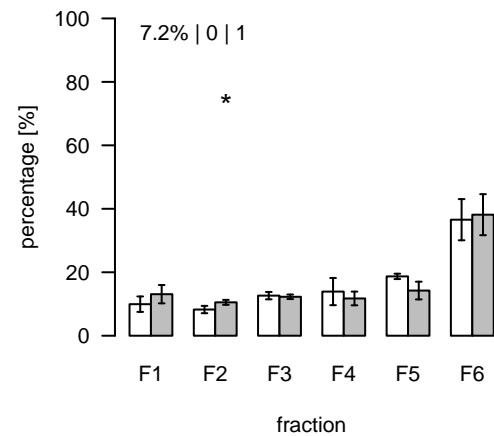

**L1170 (m/z=477.312104; rt=6.65436)**  
T/S Cluster: L-6.7-3

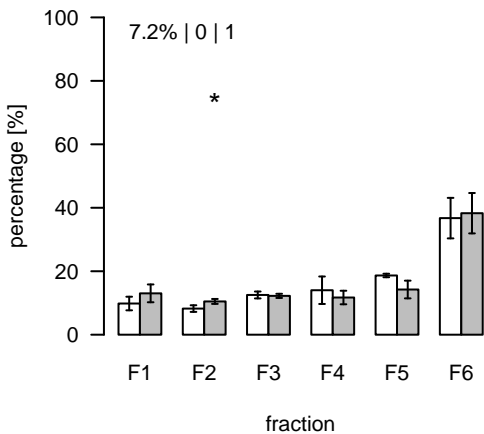

**L1163 (m/z=955.547955; rt=6.65426)**  
T/S Cluster: L-6.7-3

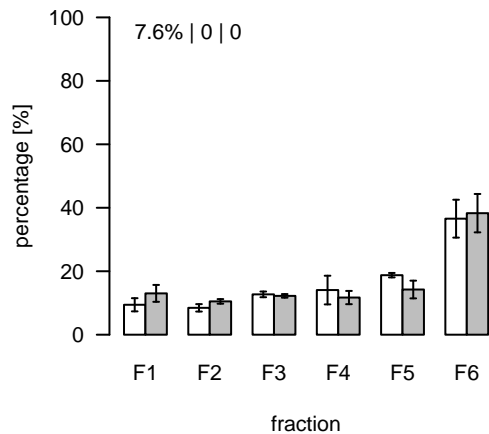

**L1168 (m/z=477.813874; rt=6.6543)**  
T/S Cluster: L-6.7-3

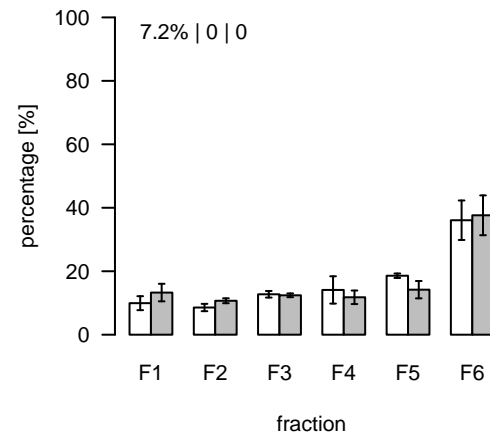

**L1166 (m/z=318.212707; rt=6.65429)**  
T/S Cluster: L-6.7-3

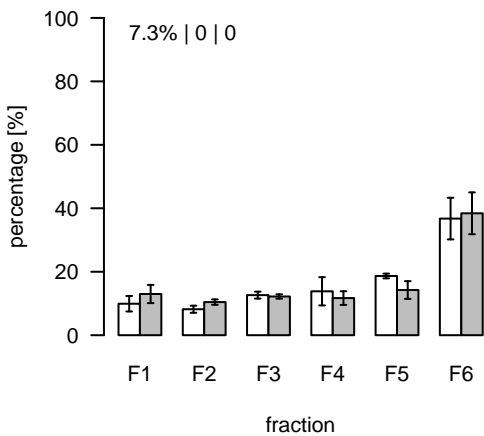

**L1147 (m/z=957.632448; rt=6.65385)**  
T/S Cluster: L-6.7-3

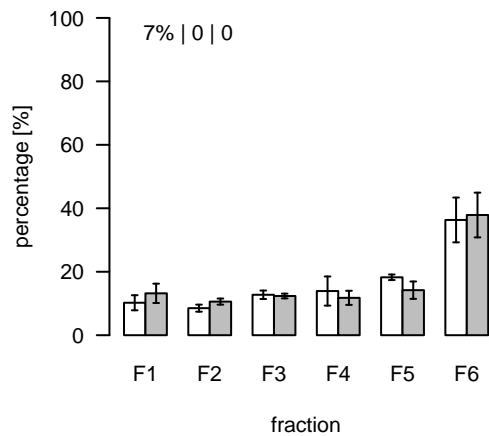

**L1165 (m/z=477.294143; rt=6.65429)**  
T/S Cluster: L-6.7-3

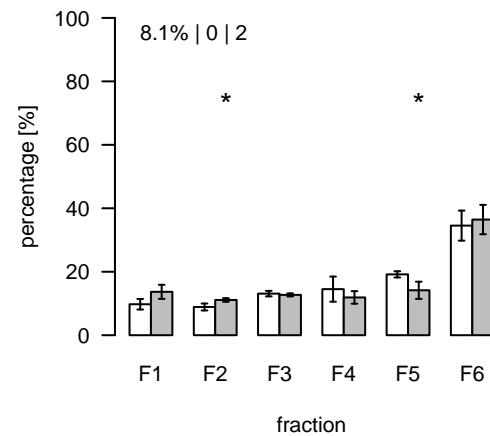

**L1157 (m/z=318.54716; rt=6.65419)**  
T/S Cluster: L-6.7-3

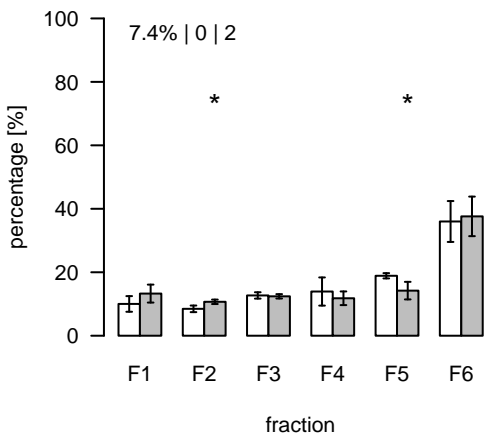

**L1161 (m/z=613.486972; rt=6.65426)**  
T/S Cluster: L-6.7-3

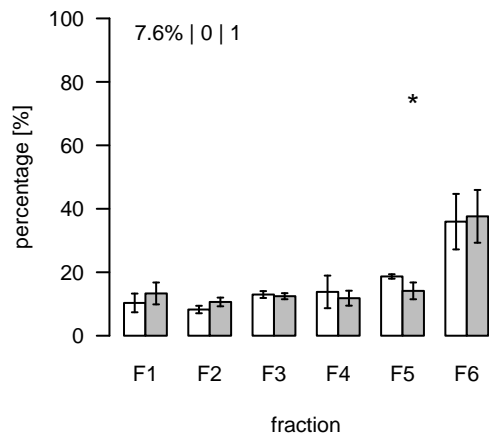

**L1162 (m/z=613.47575; rt=6.65426)**  
T/S Cluster: L-6.7-3

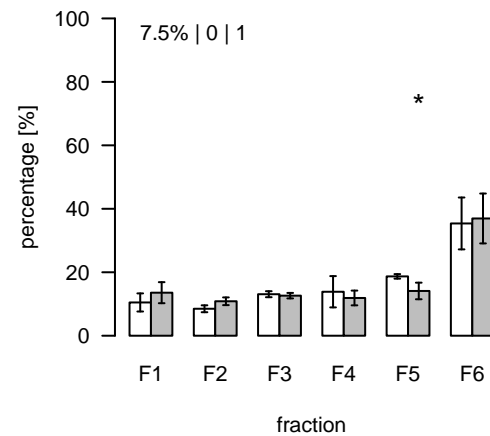

**L1155 (m/z=478.312301; rt=6.65417)**  
T/S Cluster: L-6.7-3

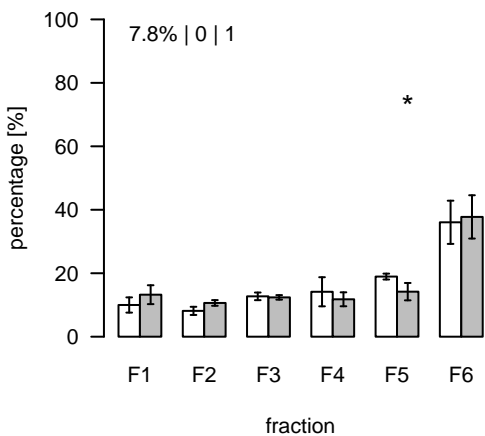

**L1158 (m/z=478.31839; rt=6.65421)**  
T/S Cluster: L-6.7-3

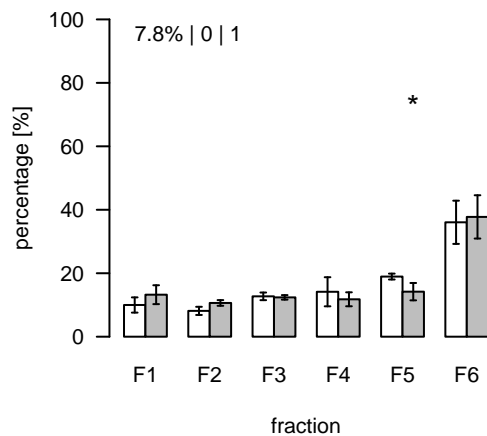

**L1152 (m/z=957.571032; rt=6.65409)**  
T/S Cluster: L-6.7-3

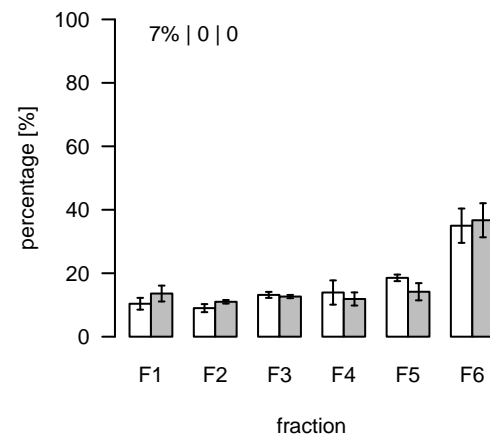

**L1149 (m/z=318.539822; rt=6.65397)**  
T/S Cluster: L-6.7-3

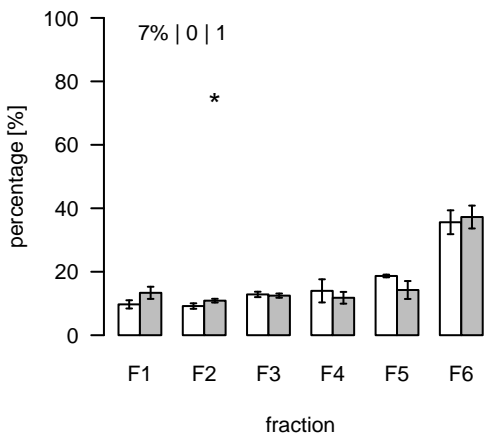

**L1167 (m/z=318.202661; rt=6.6543)**  
T/S Cluster: L-6.7-3

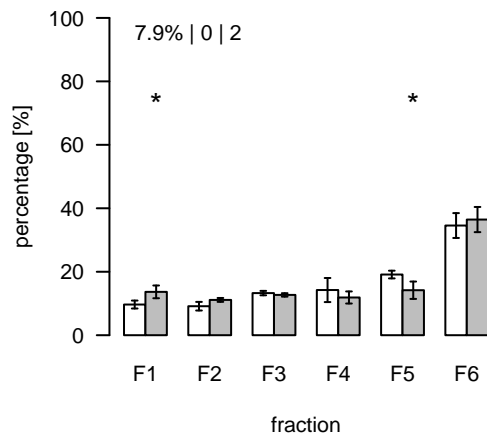

**L1156 (m/z=614.492777; rt=6.65418)**  
T/S Cluster: L-6.7-3

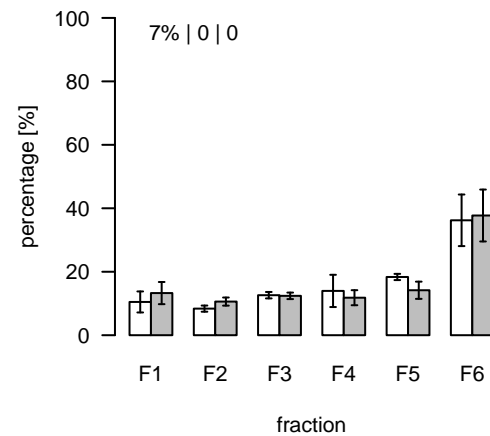

**L1160 (m/z=614.480477; rt=6.65424)**  
T/S Cluster: L-6.7-3

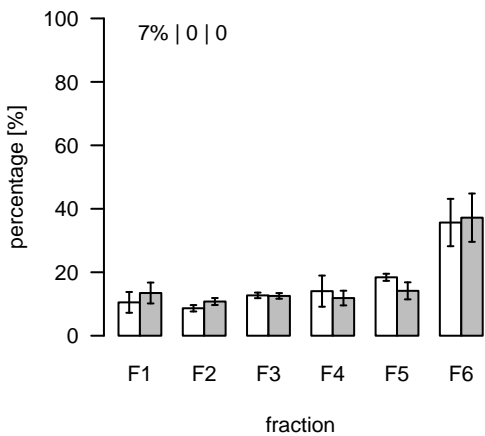

**L1145 (m/z=958.634896; rt=6.65361)**  
T/S Cluster: L-6.7-3

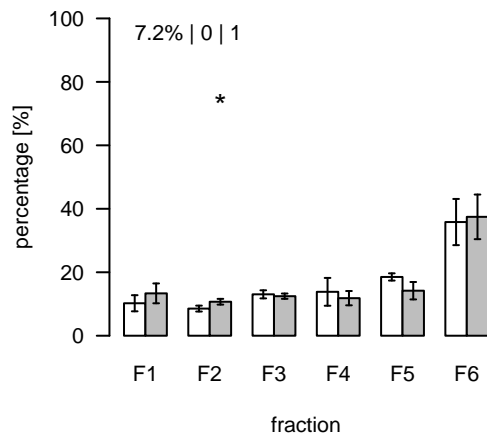

**L1146 (m/z=318.879084; rt=6.65381)**  
T/S Cluster: L-6.7-3

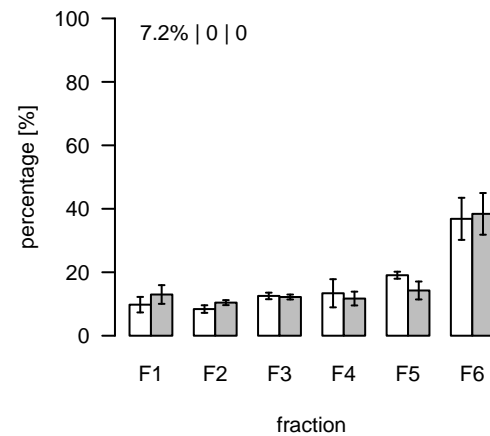



**L1148 (m/z=318.882072; rt=6.65394)**  
T/S Cluster: L-6.7-3

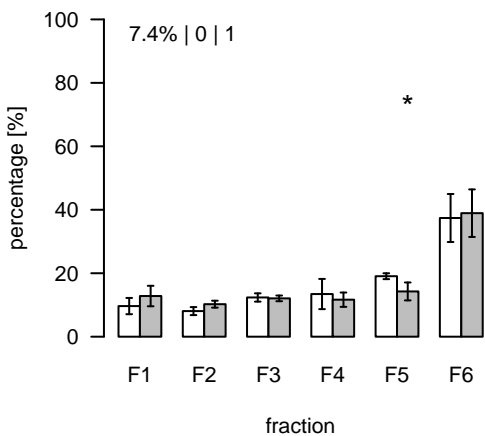

**L1169 (m/z=477.791605; rt=6.65434)**  
T/S Cluster: L-6.7-3

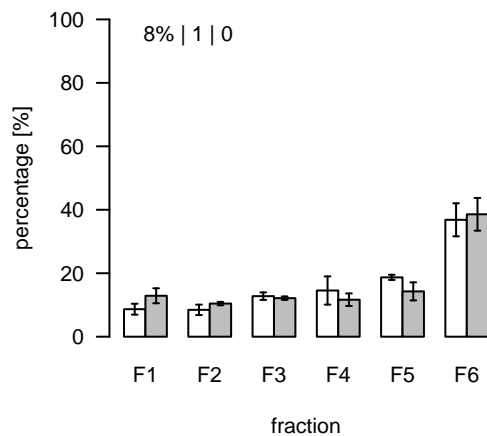

**L1150 (m/z=238.660198; rt=6.654)**  
T/S Cluster: L-6.7-3

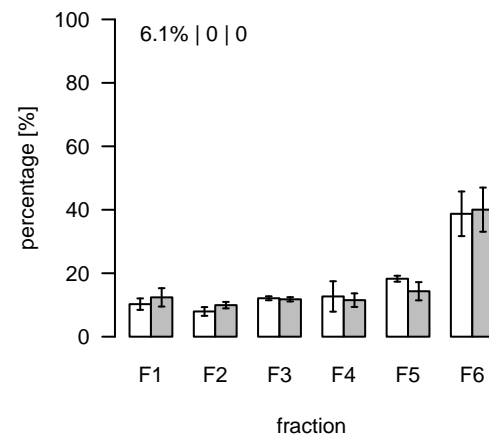

**L1151 (m/z=478.821194; rt=6.65409)**  
T/S Cluster: L-6.7-3

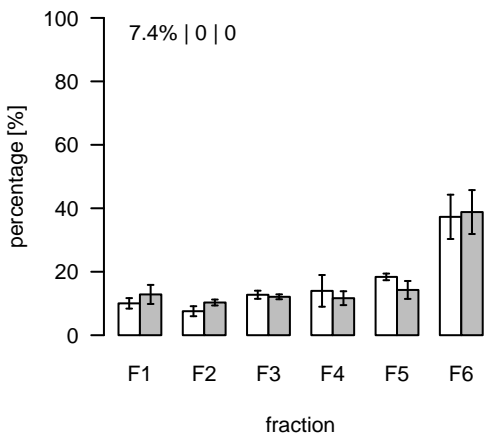

**L1154 (m/z=478.815841; rt=6.65414)**  
T/S Cluster: L-6.7-3

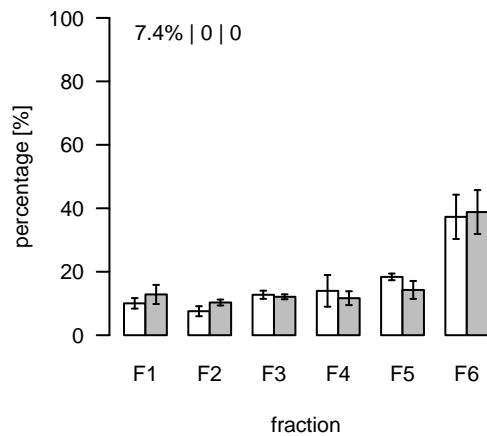

**L1171 (m/z=238.655423; rt=6.65462)**  
T/S Cluster: L-6.7-3

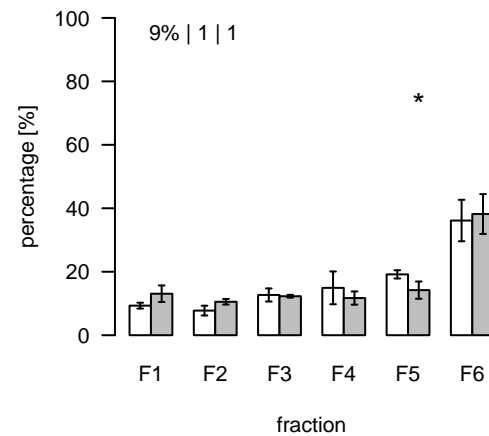

**L1203 (m/z=800.525016; rt=6.6748)**  
T/S Cluster: L-6.7-4

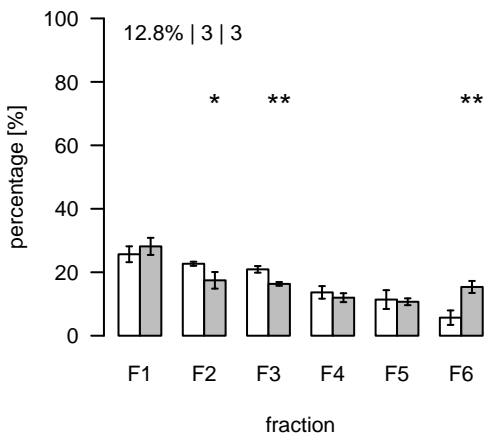

**L1172 (m/z=801.537908; rt=6.65826)**  
T/S Cluster: L-6.7-4

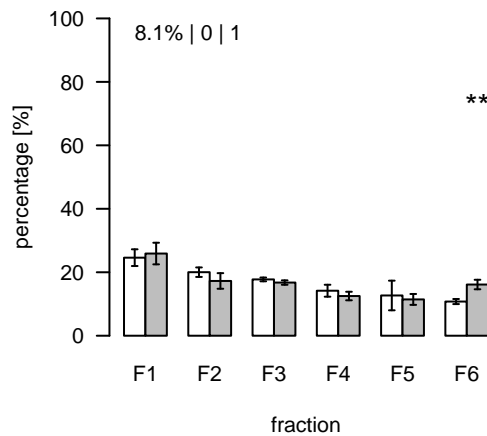

**L1173 (m/z=391.288442; rt=6.65877)**  
T/S Cluster: L-6.7-5

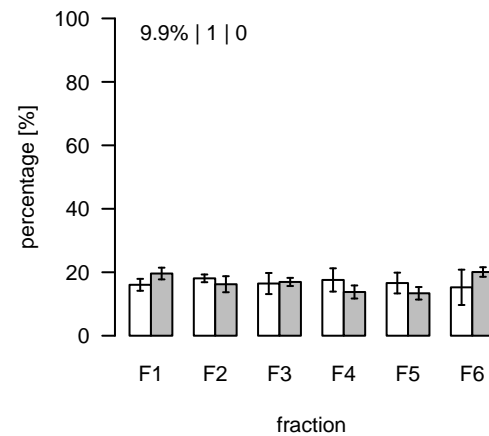

**L1174 (m/z=391.283388; rt=6.65946)**  
T/S Cluster: L-6.7-5

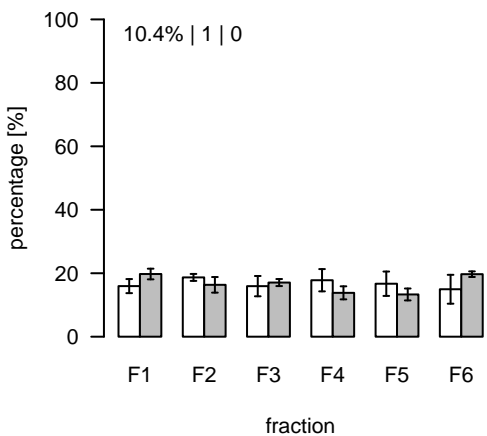

**L1177 (m/z=959.582032; rt=6.66037)**  
T/S Cluster: L-6.7-6

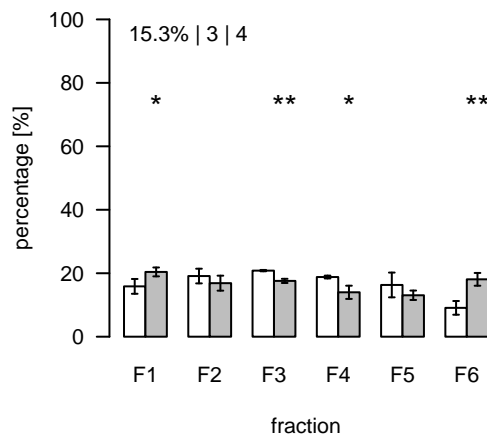

**L1180 (m/z=959.563178; rt=6.66078)**  
T/S Cluster: L-6.7-6

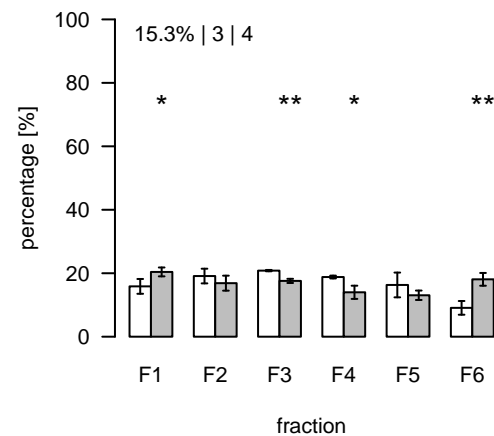

**L1175 (m/z=960.585945; rt=6.65986)**  
T/S Cluster: L-6.7-6

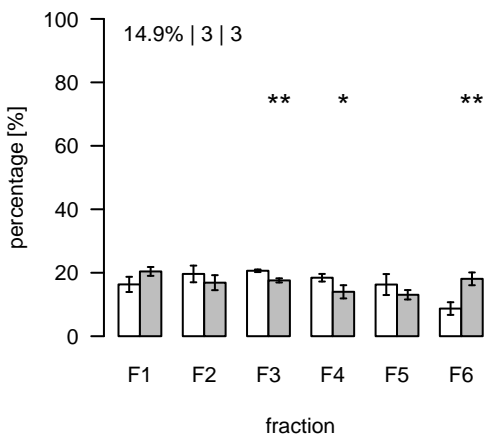

**L1176 (m/z=960.567523; rt=6.66019)**  
T/S Cluster: L-6.7-6

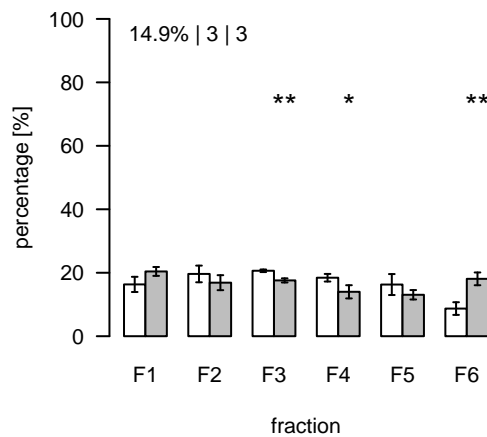

**L1179 (m/z=961.584171; rt=6.66074)**  
T/S Cluster: L-6.7-6

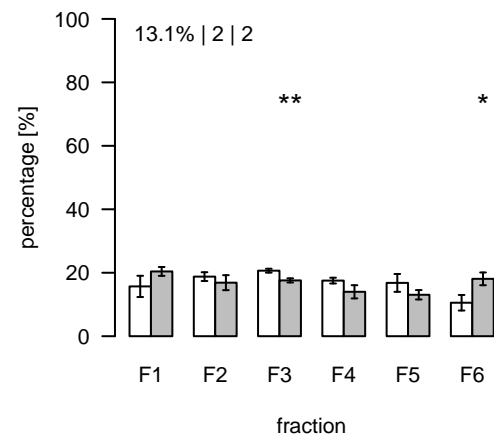

**L1181 (m/z=479.789854; rt=6.66109)**  
T/S Cluster: L-6.7-6

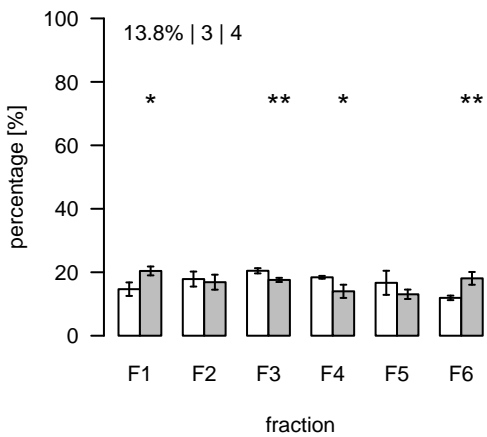

**L1178 (m/z=975.551241; rt=6.66073)**  
T/S Cluster: L-6.7-7

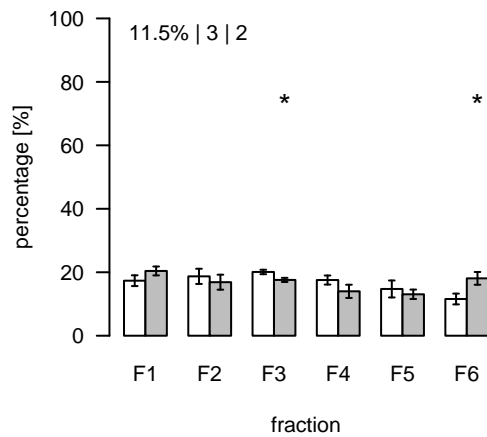

**L1192 (m/z=778.543084; rt=6.66672)**  
T/S Cluster: L-6.7-8

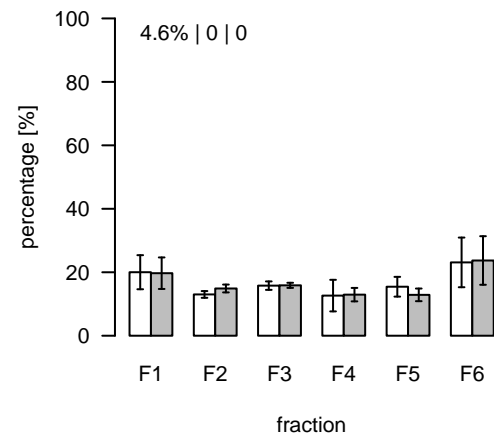

**L1188 (m/z=779.547799; rt=6.66657)**  
T/S Cluster: L-6.7-8

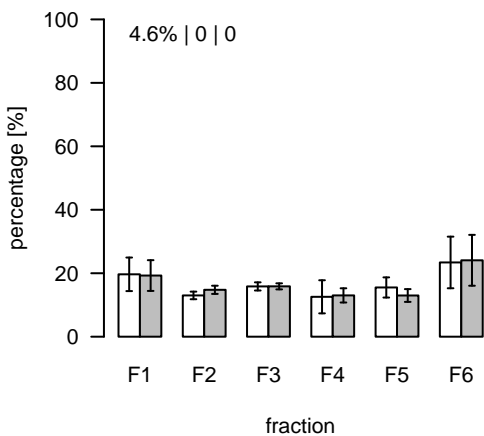

**L1198 (m/z=779.503425; rt=6.66719)**  
T/S Cluster: L-6.7-8

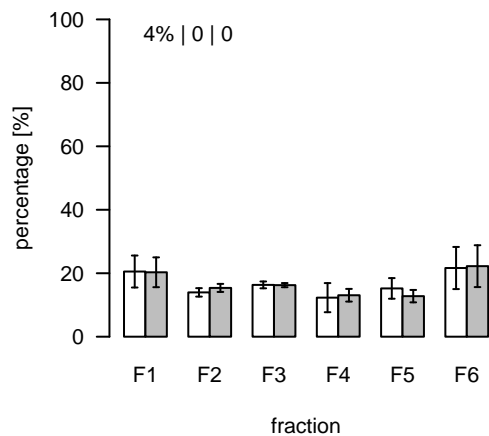

**L1186 (m/z=780.5503; rt=6.66651)**  
T/S Cluster: L-6.7-8

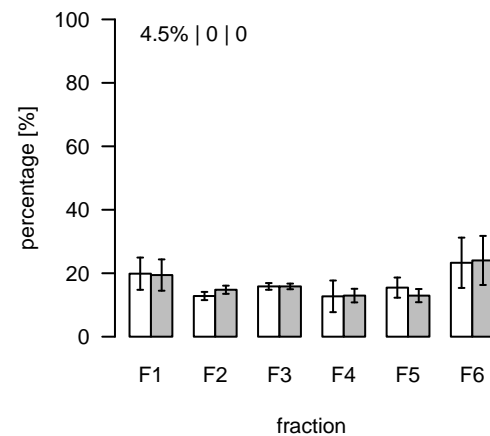

**L1196 (m/z=389.272583; rt=6.66701)**  
T/S Cluster: L-6.7-8

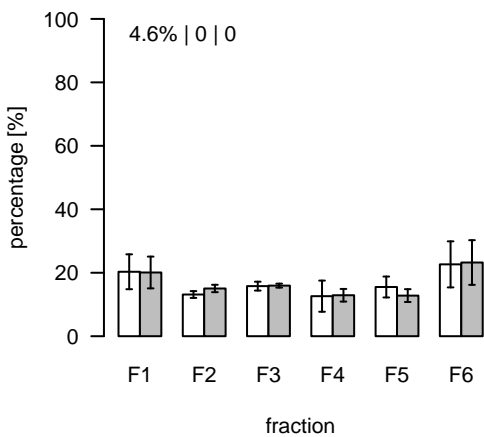

**L1195 (m/z=778.486081; rt=6.66698)**  
T/S Cluster: L-6.7-8

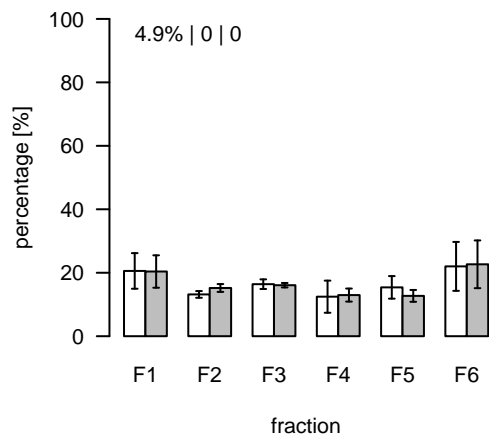

**L1197 (m/z=780.521316; rt=6.66708)**  
T/S Cluster: L-6.7-8

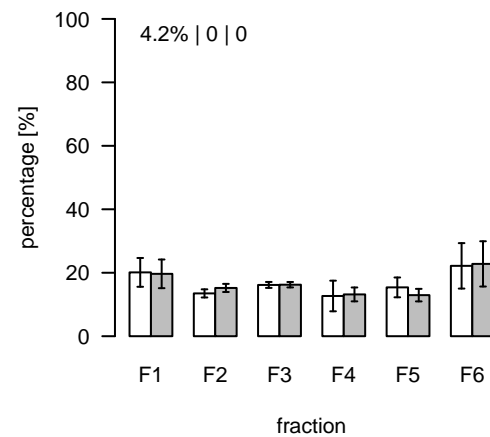

**L1189 (m/z=389.777037; rt=6.66658)**  
T/S Cluster: L-6.7-8

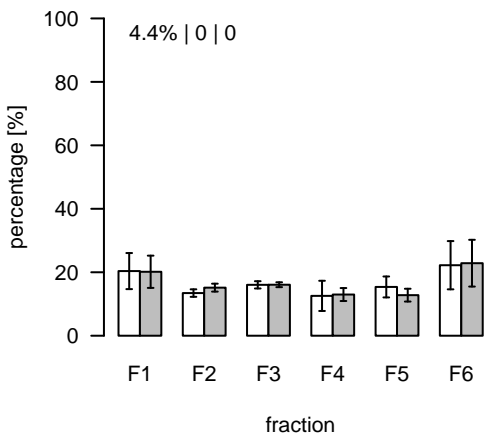

**L1199 (m/z=389.771084; rt=6.66741)**  
T/S Cluster: L-6.7-8

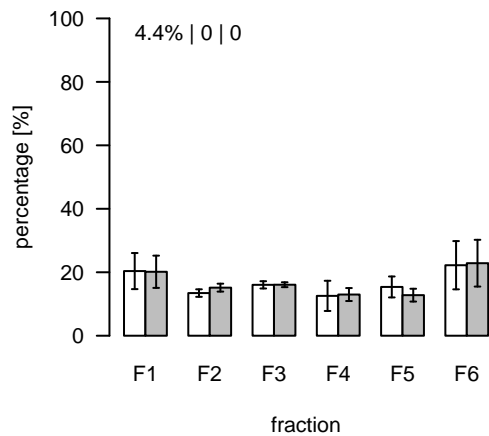

**L1193 (m/z=259.518178; rt=6.66678)**  
T/S Cluster: L-6.7-8

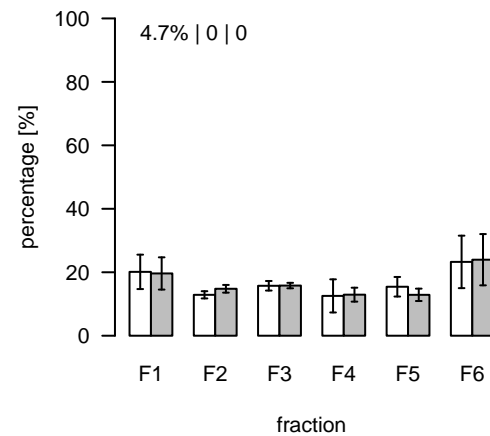

**L1183 (m/z=781.558023; rt=6.66622)**  
T/S Cluster: L-6.7-8

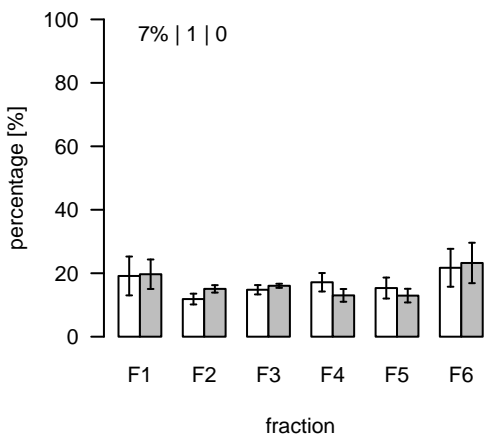

**L1184 (m/z=781.553483; rt=6.6663)**  
T/S Cluster: L-6.7-8

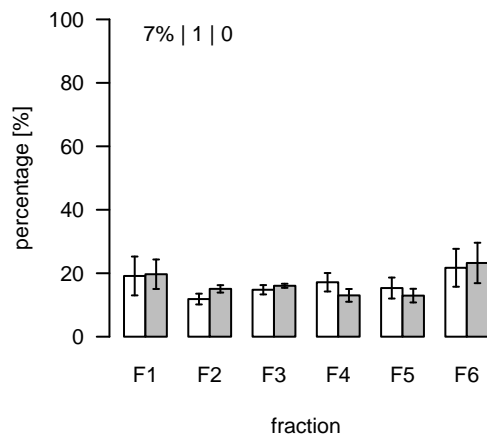

**L1187 (m/z=781.538822; rt=6.66656)**  
T/S Cluster: L-6.7-8

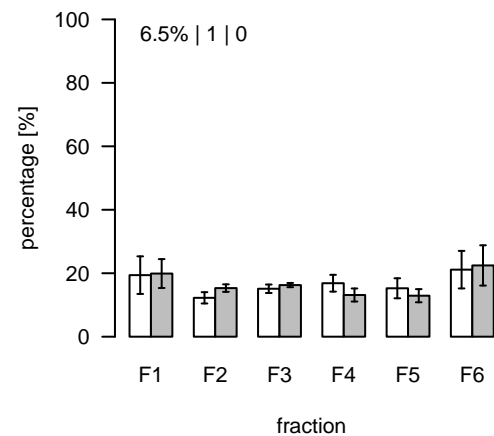

**L1185 (m/z=259.852965; rt=6.66638)**  
T/S Cluster: L-6.7-8

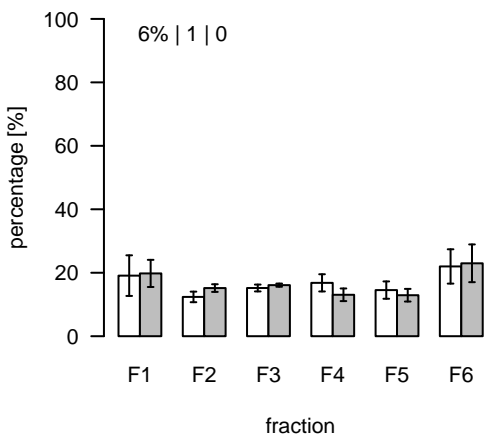

**L1201 (m/z=259.513083; rt=6.66829)**  
T/S Cluster: L-6.7-8

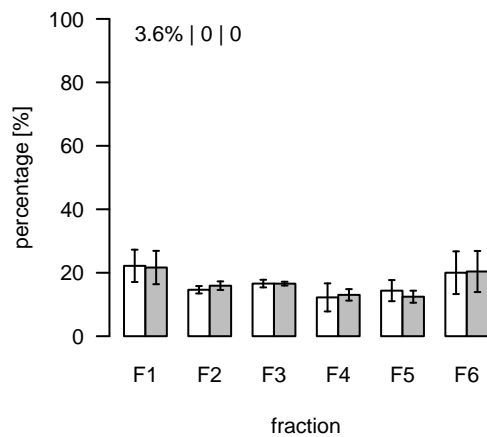

**L1202 (m/z=389.258901; rt=6.66929)**  
T/S Cluster: L-6.7-8

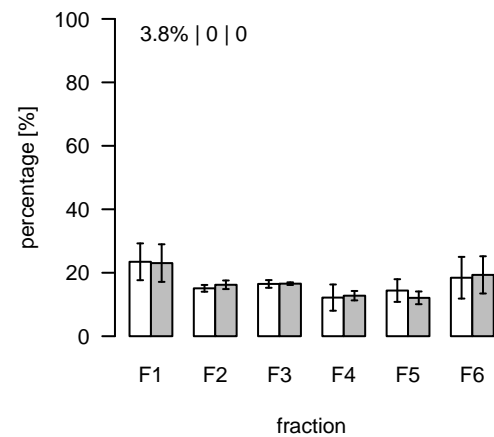

**L1200 (m/z=259.84981; rt=6.66783)**  
T/S Cluster: L-6.7-8

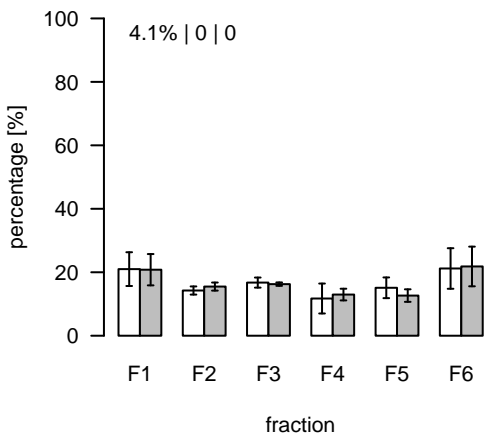

**L1190 (m/z=390.276215; rt=6.66658)**  
T/S Cluster: L-6.7-8

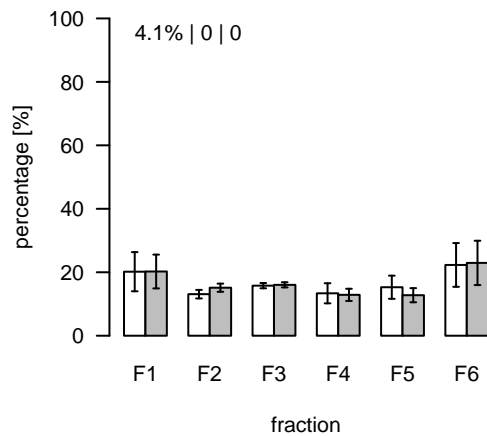

**L1194 (m/z=390.274682; rt=6.66682)**  
T/S Cluster: L-6.7-8

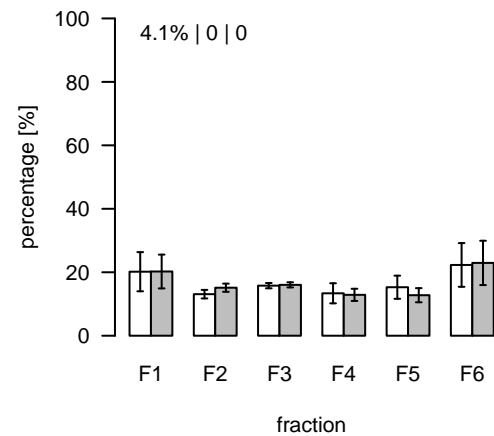

**L1182 (m/z=390.280436; rt=6.66596)**  
T/S Cluster: L-6.7-8

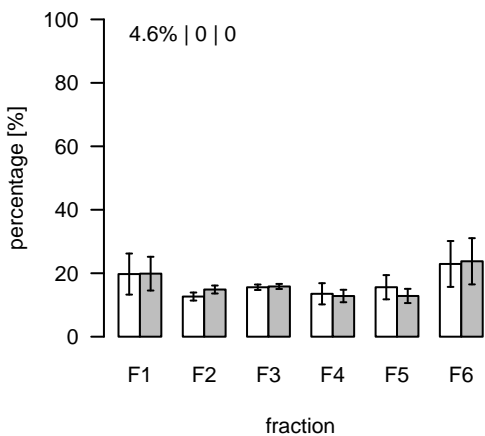

**L1191 (m/z=781.514124; rt=6.66662)**  
T/S Cluster: L-6.7-8

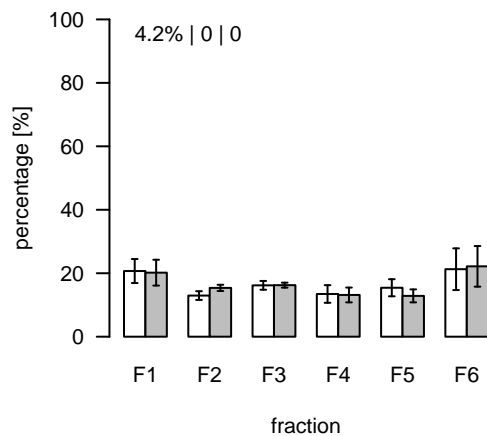

**L1204 (m/z=778.615095; rt=6.68098)**  
T/S Cluster: L-6.7-9

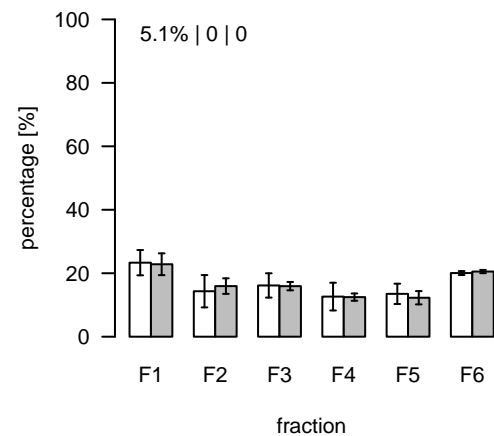

**L1205 (m/z=777.523619; rt=6.69581)**  
T/S Cluster: L-6.7-10

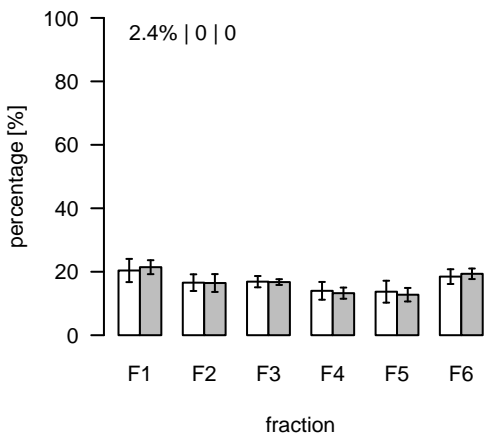

**L1209 (m/z=776.584556; rt=6.69969)**  
T/S Cluster: L-6.7-11

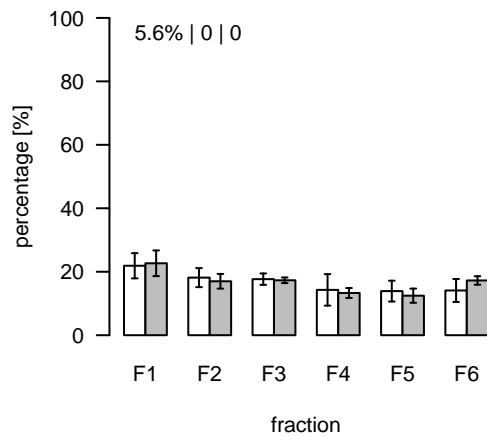

**L1207 (m/z=777.588171; rt=6.69893)**  
T/S Cluster: L-6.7-11

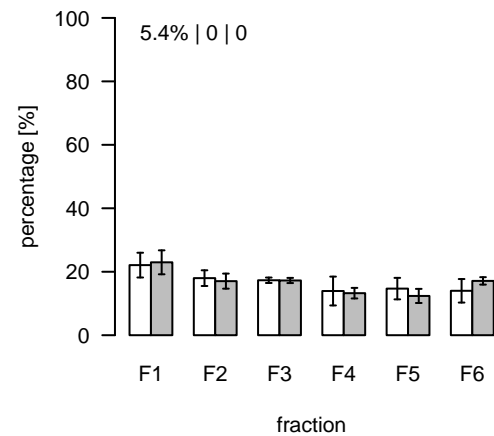

**L1210 (m/z=776.539221; rt=6.69982)**  
T/S Cluster: L-6.7-11

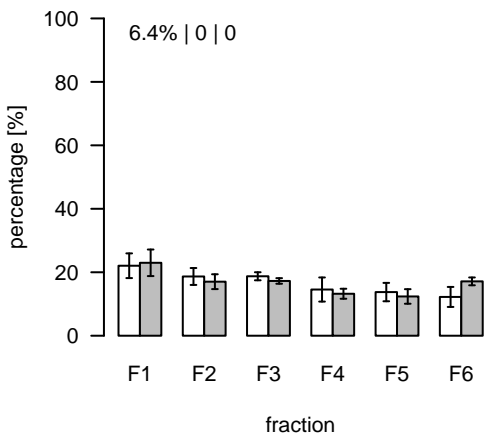

**L1208 (m/z=388.293339; rt=6.69962)**  
T/S Cluster: L-6.7-11

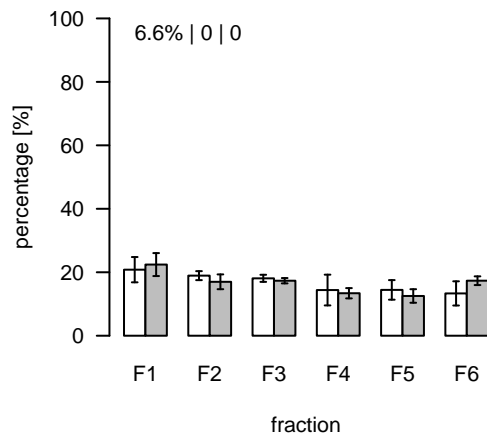

**L1206 (m/z=388.794852; rt=6.69782)**  
T/S Cluster: L-6.7-11

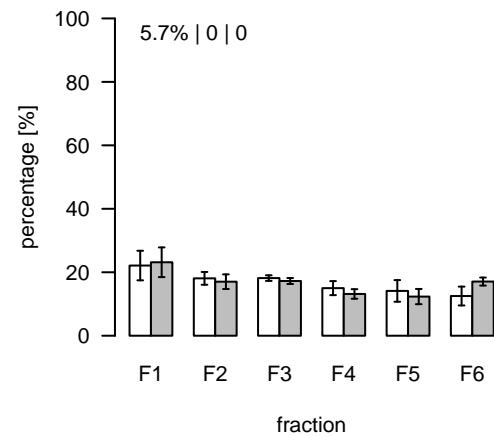

**L1211 (m/z=788.59064; rt=6.72186)**  
T/S Cluster: L-6.7-12

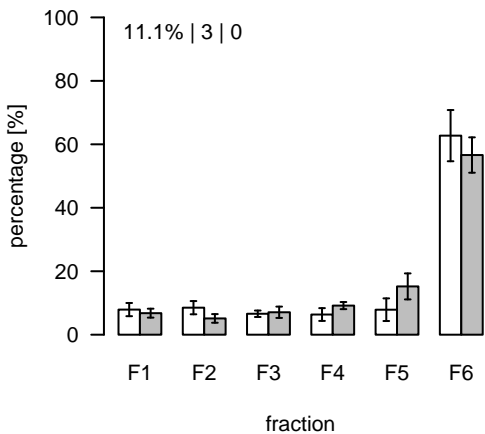

**L1212 (m/z=950.648958; rt=6.73448)**  
T/S Cluster: L-6.7-13

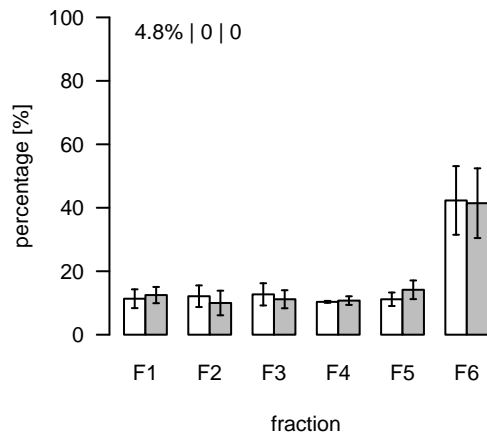

**L1220 (m/z=792.528373; rt=6.77736)**  
T/S Cluster: L-6.8-1

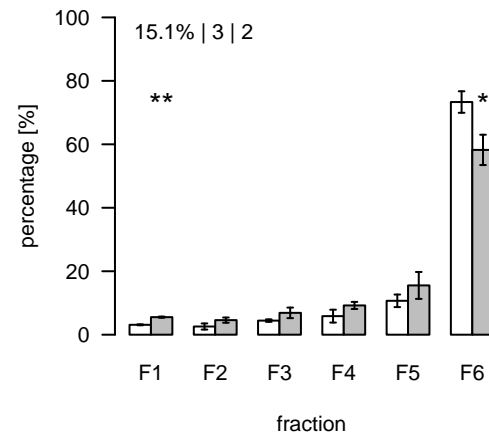

**L1221 (m/z=792.50856; rt=6.7775)**  
T/S Cluster: L-6.8-1

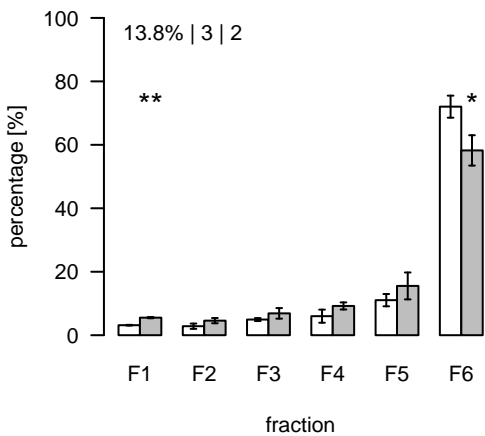

**L1213 (m/z=764.532429; rt=6.77155)**  
T/S Cluster: L-6.8-1

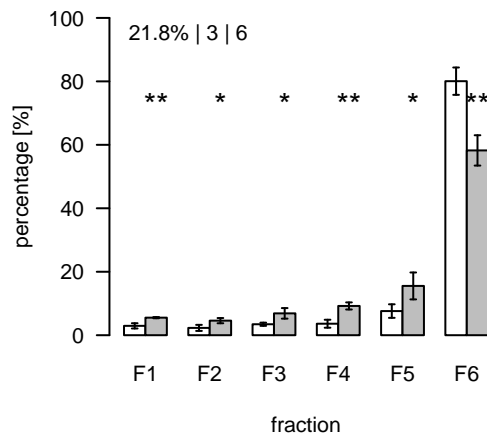

**L1218 (m/z=769.494289; rt=6.77677)**  
T/S Cluster: L-6.8-1

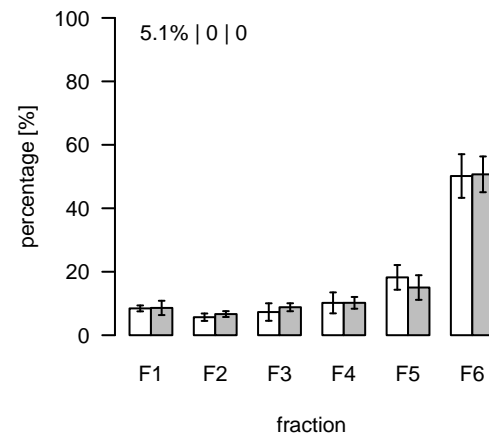

**L1219 (m/z=769.48906; rt=6.77689)**  
T/S Cluster: L-6.8-1

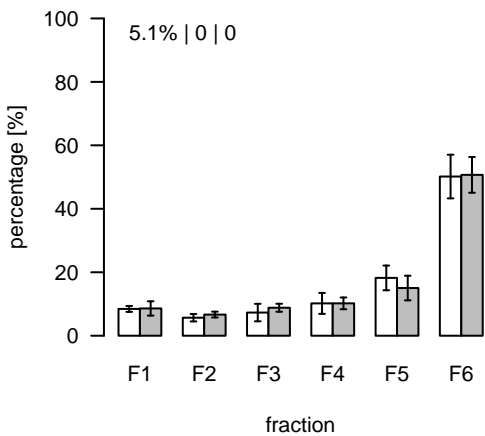

**L1214 (m/z=765.536437; rt=6.77162)**  
T/S Cluster: L-6.8-1

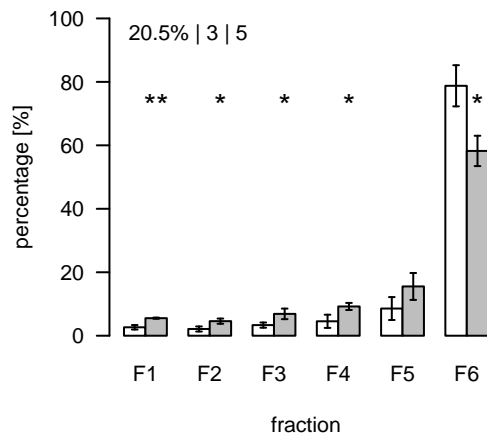

**L1215 (m/z=765.536849; rt=6.77162)**  
T/S Cluster: L-6.8-1

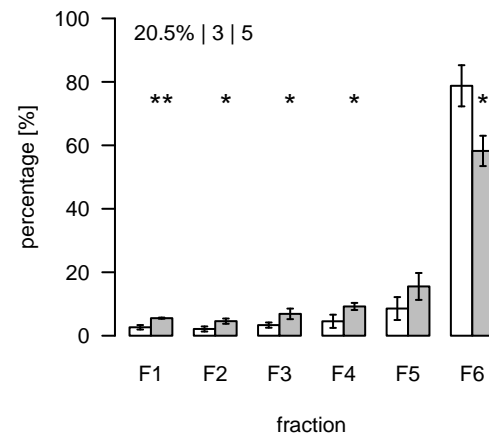

**L1216 (m/z=764.487676; rt=6.77247)**  
T/S Cluster: L-6.8-1

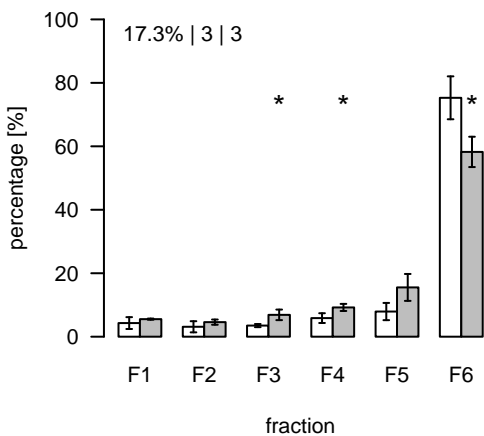

**L1217 (m/z=769.524515; rt=6.77556)**  
T/S Cluster: L-6.8-1

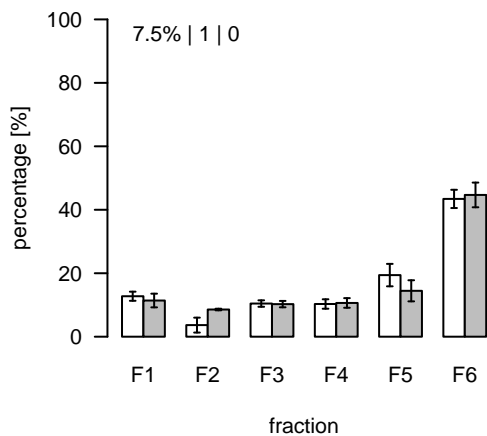

**L1226 (m/z=774.5685; rt=6.79914)**  
T/S Cluster: L-6.8-2

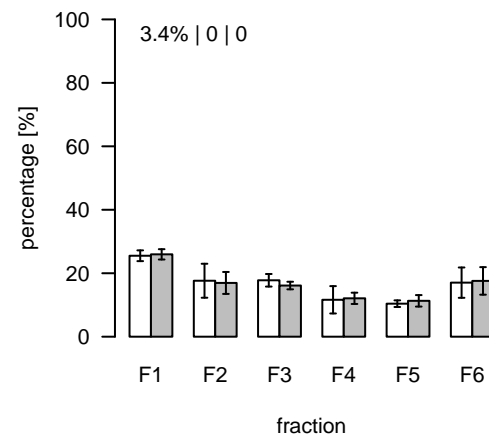

**L1225 (m/z=775.572513; rt=6.79827)**  
T/S Cluster: L-6.8-2

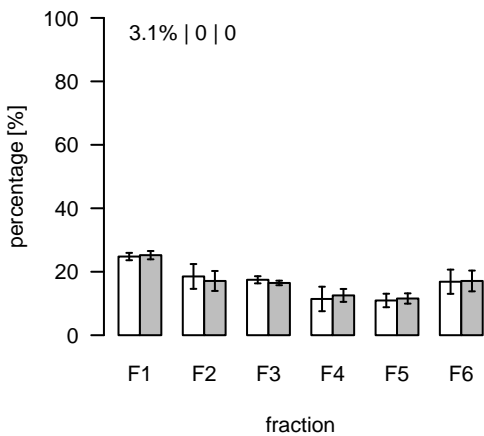

**L1223 (m/z=774.532356; rt=6.7834)**  
T/S Cluster: L-6.8-2

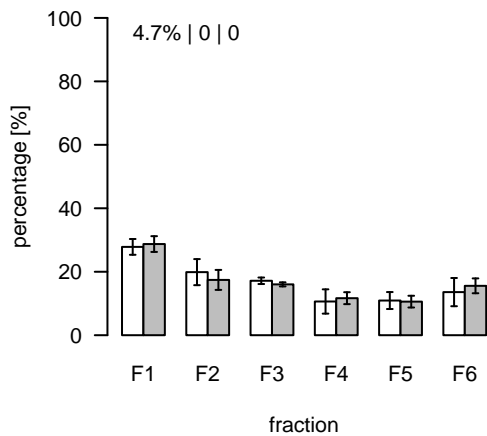

**L1222 (m/z=775.537098; rt=6.7827)**  
T/S Cluster: L-6.8-2

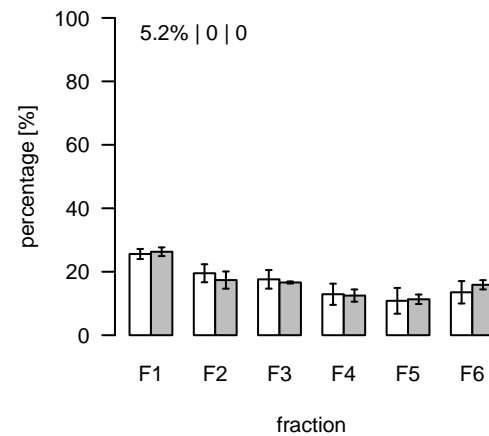

**L1224 (m/z=387.284815; rt=6.79793)**  
T/S Cluster: L-6.8-3

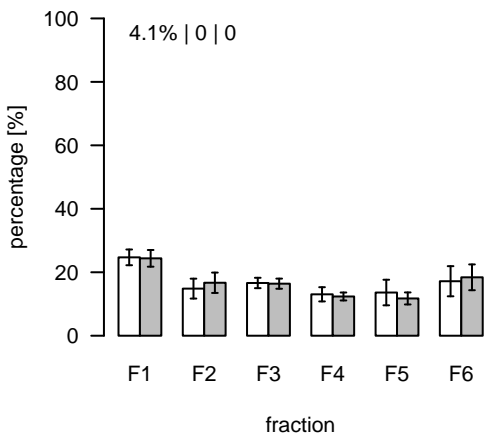

**L1227 (m/z=925.495914; rt=6.81461)**  
T/S Cluster: L-6.8-4

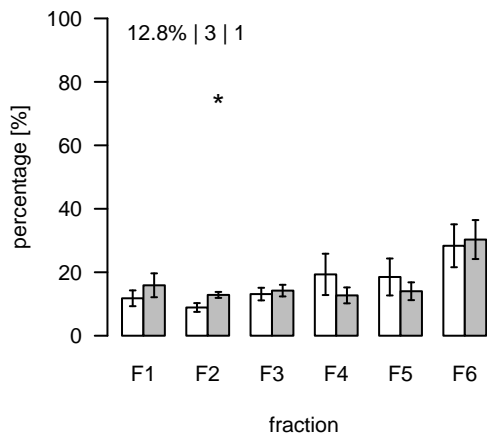

**L1228 (m/z=925.539202; rt=6.81597)**  
T/S Cluster: L-6.8-4

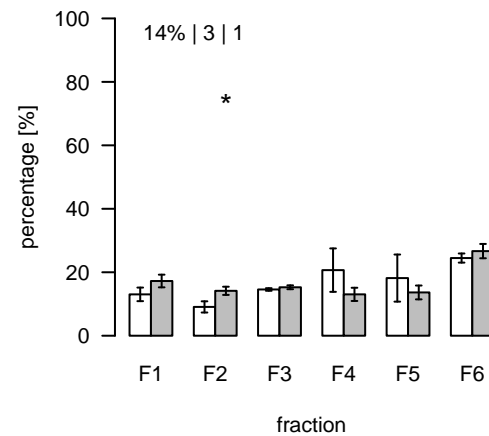

**L1229 (m/z=802.59111; rt=6.85467)**  
T/S Cluster: L-6.9-1

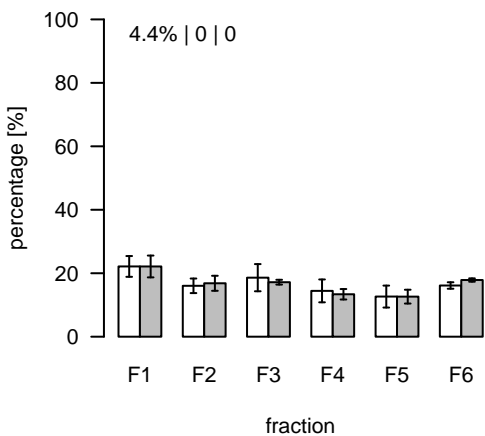

**L1230 (m/z=802.539836; rt=6.88223)**  
T/S Cluster: L-6.9-2

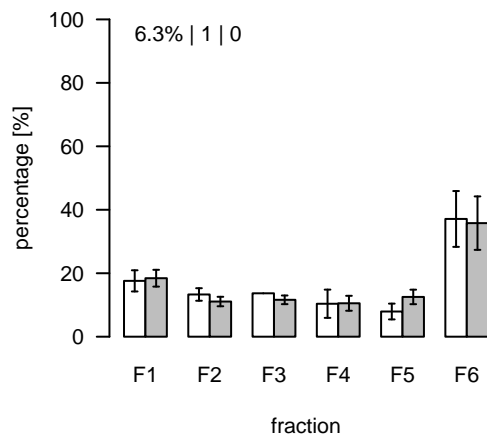

**L1233 (m/z=954.619067; rt=6.89941)**  
T/S Cluster: L-6.9-3

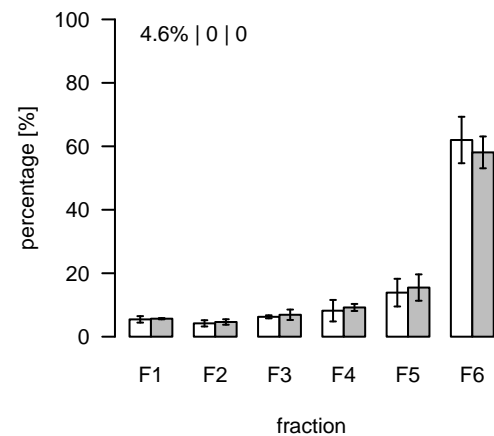

**L1232 (m/z=955.622607; rt=6.89929)**  
T/S Cluster: L-6.9-3

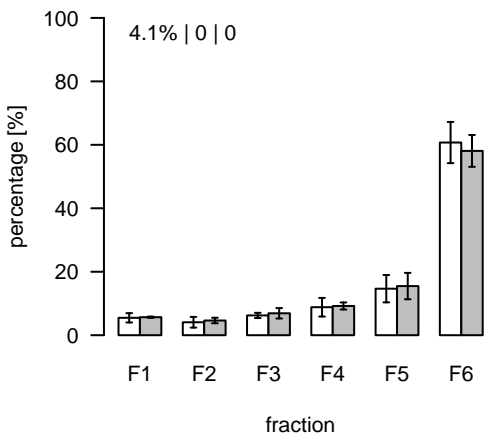

**L1231 (m/z=955.575801; rt=6.89801)**  
T/S Cluster: L-6.9-3

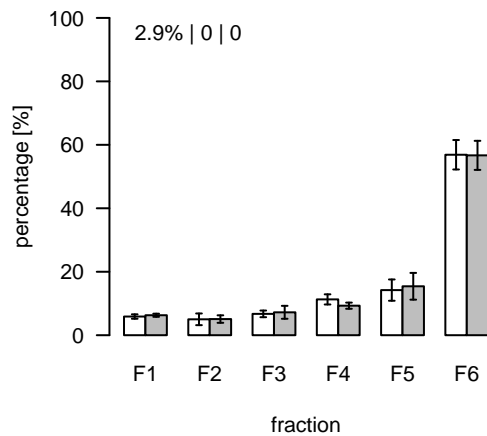

**L1234 (m/z=778.545388; rt=6.90841)**  
T/S Cluster: L-6.9-4

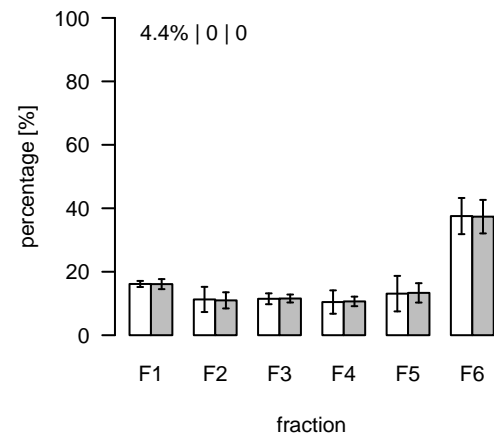

**L1237 (m/z=762.53198; rt=6.93721)**  
T/S Cluster: L-6.9-5

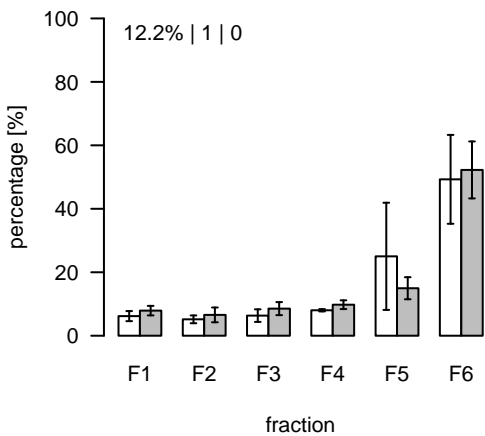

**L1235 (m/z=763.535252; rt=6.93714)**  
T/S Cluster: L-6.9-5

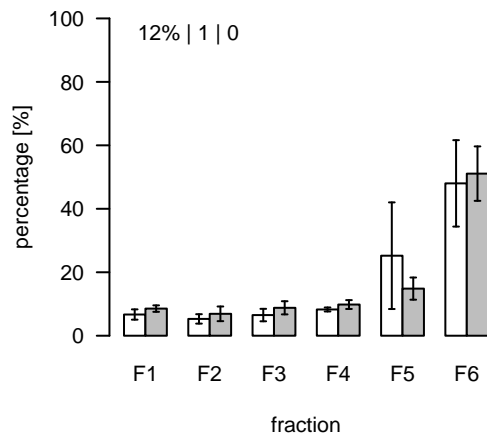

**L1238 (m/z=762.499191; rt=6.93733)**  
T/S Cluster: L-6.9-5

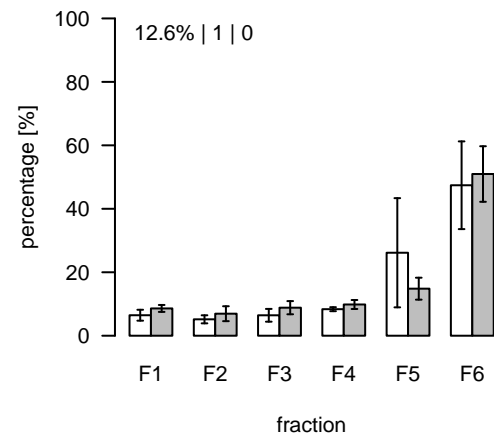



**L1236 (m/z=763.501222; rt=6.93718)**  
T/S Cluster: L-6.9-5

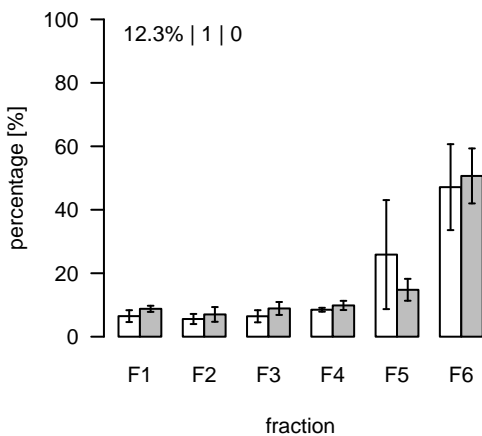

**L1240 (m/z=774.509065; rt=6.95421)**  
T/S Cluster: L-7-1

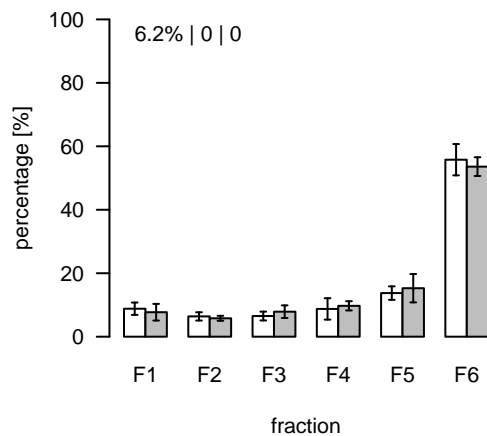

**L1239 (m/z=775.513288; rt=6.95372)**  
T/S Cluster: L-7-1

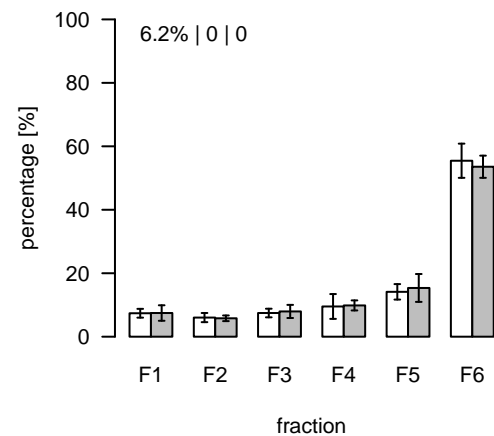

**L1244 (m/z=927.555664; rt=6.99432)**  
T/S Cluster: L-7-1

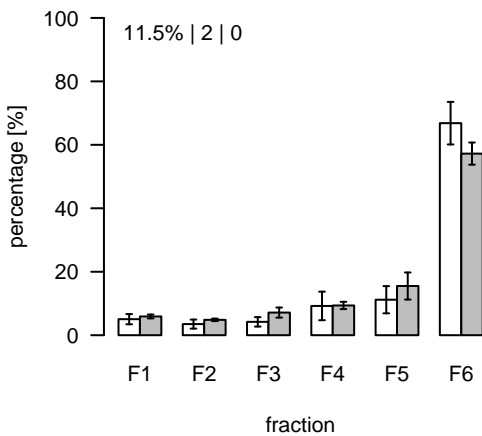

**L1243 (m/z=927.531455; rt=6.99409)**  
T/S Cluster: L-7-1

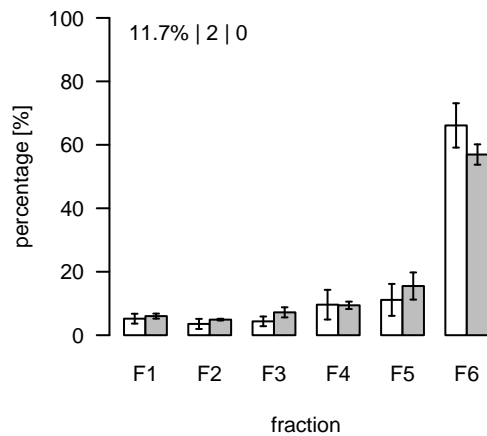

**L1241 (m/z=774.552902; rt=6.95889)**  
T/S Cluster: L-7-2

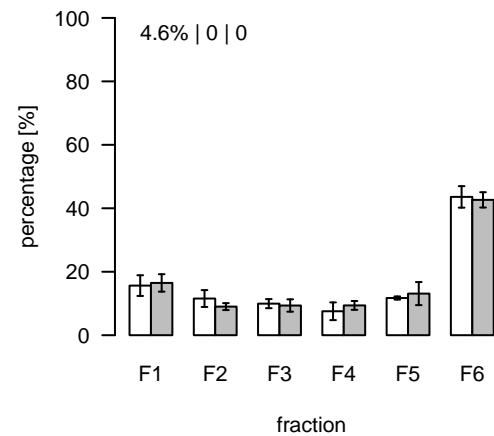

**L1242 (m/z=775.555999; rt=6.95891)**  
T/S Cluster: L-7-2

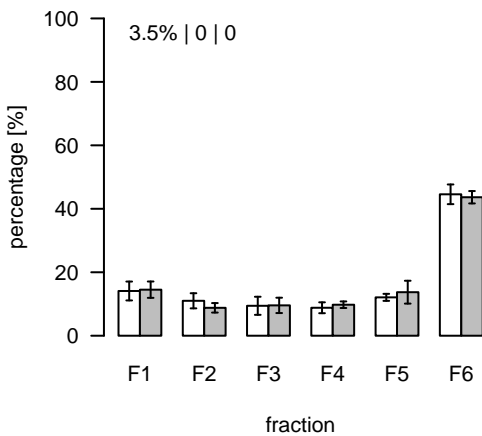

**L1245 (m/z=800.584798; rt=7.00222)**  
T/S Cluster: L-7-3

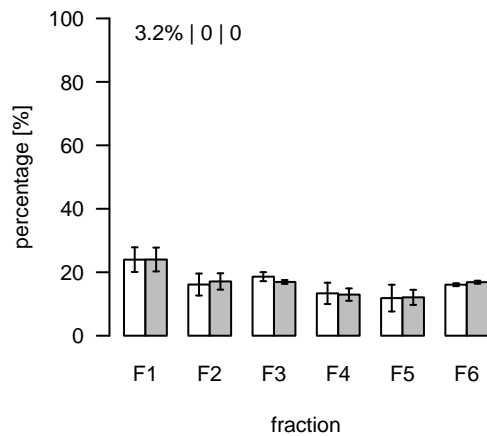

**L1253 (m/z=930.62153; rt=7.11744)**  
T/S Cluster: L-7.1-1

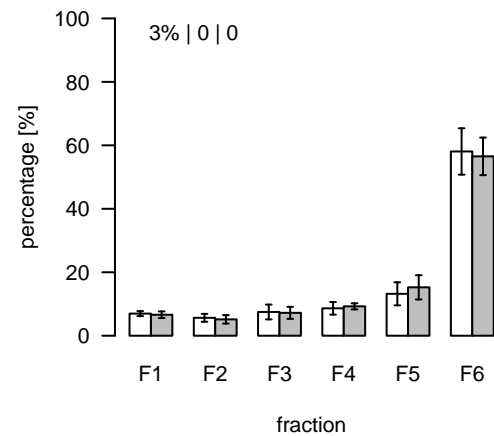

**L1252 (m/z=930.587317; rt=7.11533)**  
T/S Cluster: L-7.1-1

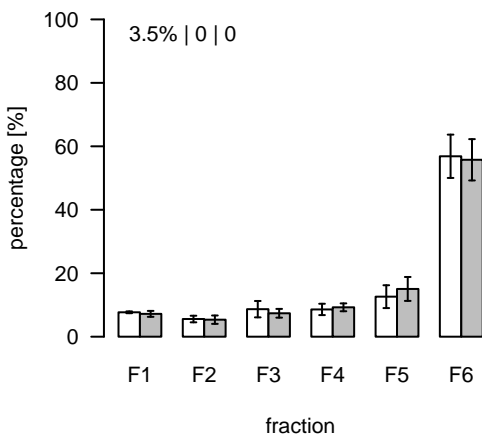

**L1246 (m/z=909.540923; rt=7.05822)**  
T/S Cluster: L-7.1-1

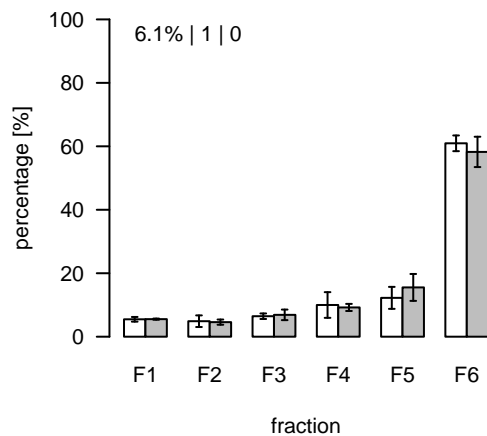

**L1247 (m/z=909.506928; rt=7.05835)**  
T/S Cluster: L-7.1-1

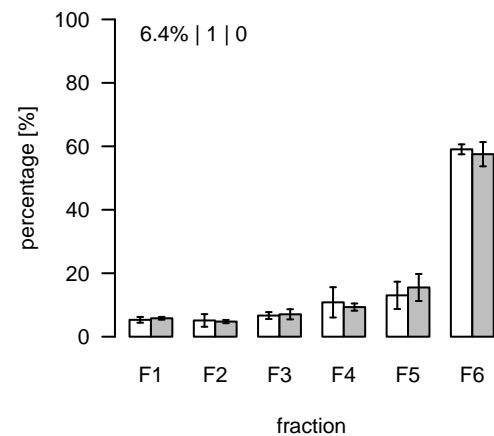

**L1248 (m/z=801.526373; rt=7.06467)**  
T/S Cluster: L-7.1-2

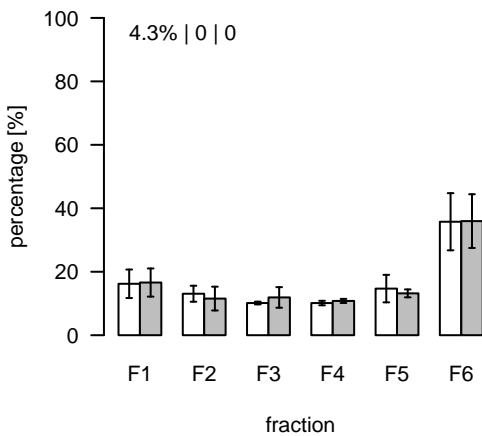

**L1249 (m/z=800.508321; rt=7.07151)**  
T/S Cluster: L-7.1-3

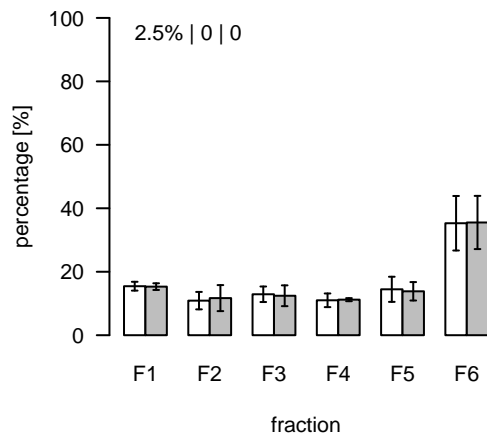

**L1250 (m/z=728.525673; rt=7.09921)**  
T/S Cluster: L-7.1-4

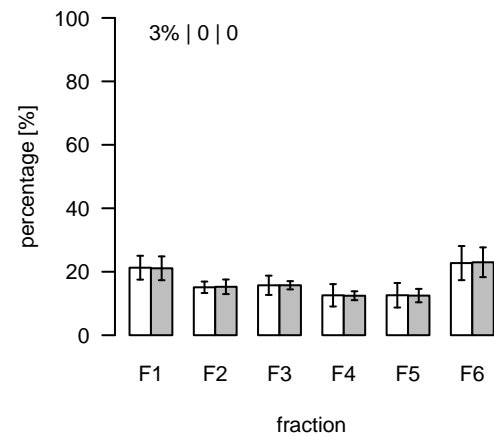

**L1254 (m/z=802.600881; rt=7.1232)**  
T/S Cluster: L-7.1-5

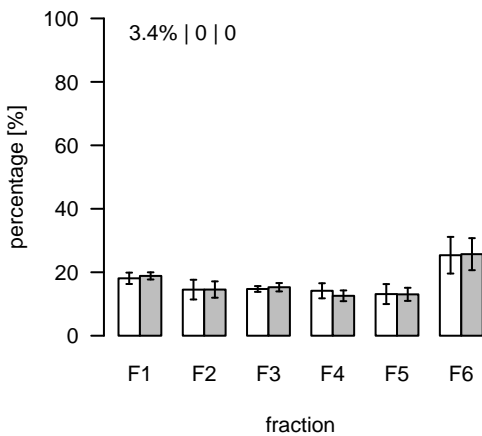

**L1251 (m/z=802.571392; rt=7.11509)**  
T/S Cluster: L-7.1-5

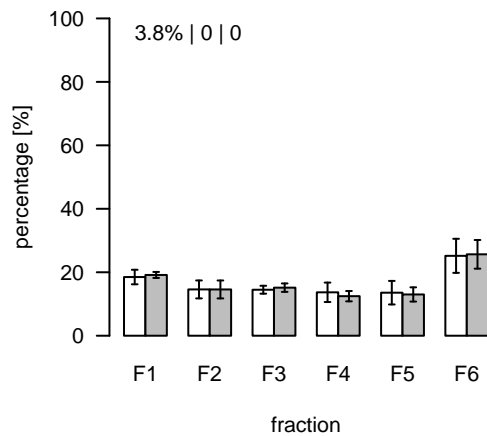

**L1255 (m/z=803.603809; rt=7.12631)**  
T/S Cluster: L-7.1-6

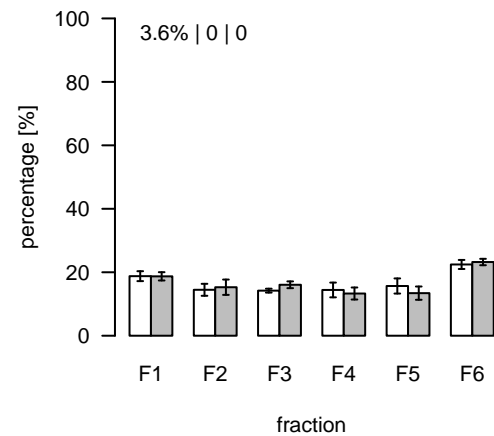

**L1265 (m/z=732.565721; rt=7.16426)**  
T/S Cluster: L-7.2-1

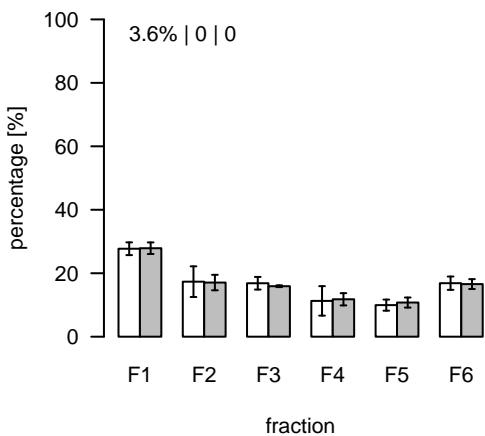

**L1264 (m/z=732.539379; rt=7.16414)**  
T/S Cluster: L-7.2-1

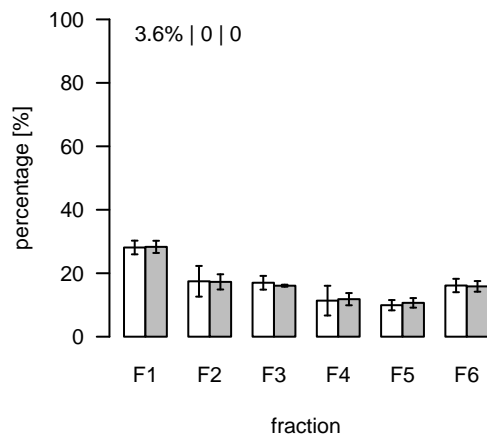

**L1262 (m/z=733.569331; rt=7.16409)**  
T/S Cluster: L-7.2-1

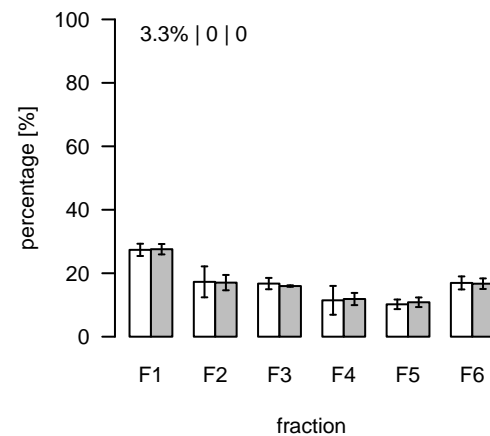

**L1257 (m/z=733.542083; rt=7.16388)**  
T/S Cluster: L-7.2-1

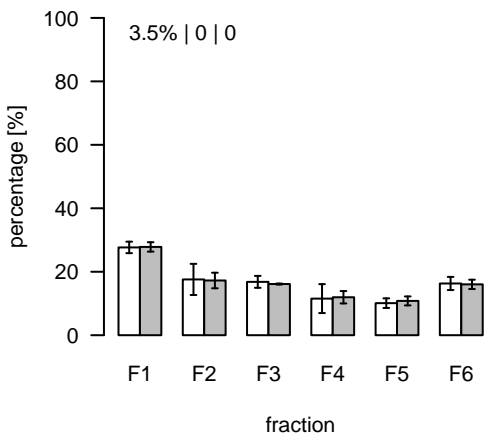

**L1266 (m/z=366.281817; rt=7.16428)**  
T/S Cluster: L-7.2-1

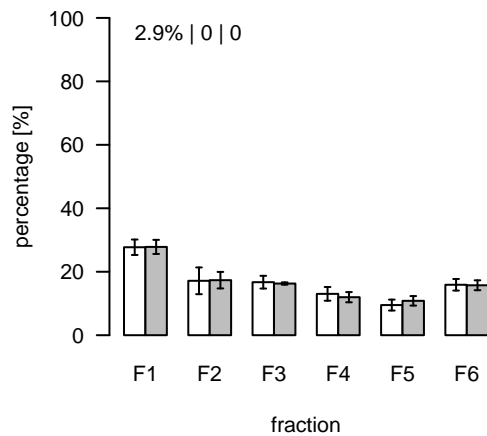

**L1267 (m/z=366.287217; rt=7.16443)**  
T/S Cluster: L-7.2-1

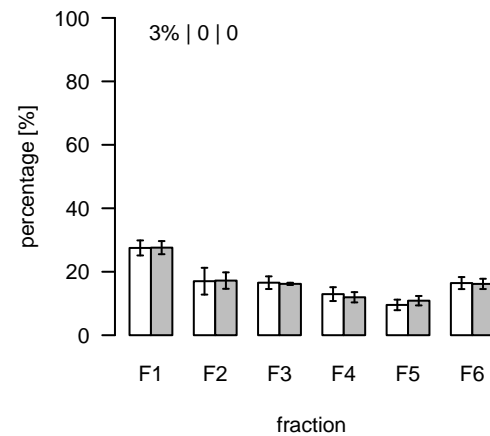

**L1261 (m/z=734.571623; rt=7.16406)**  
T/S Cluster: L-7.2-1

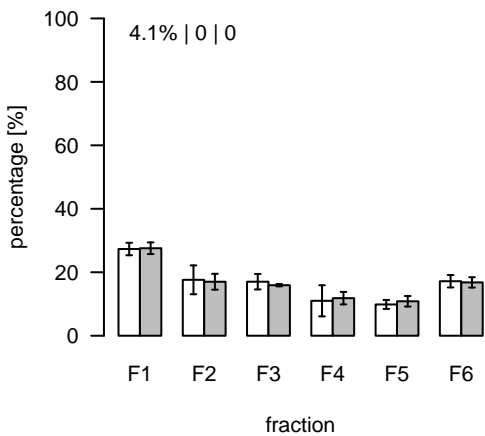

**L1288 (m/z=858.670239; rt=7.23033)**  
T/S Cluster: L-7.2-1

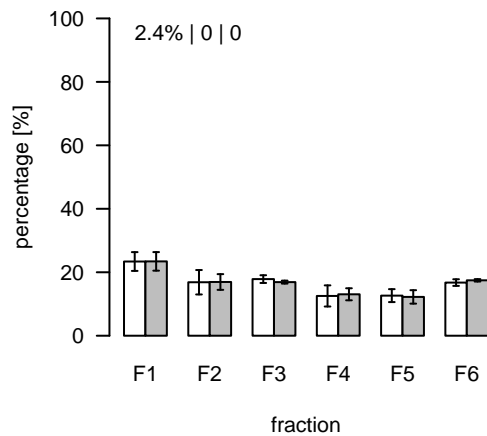

**L1259 (m/z=734.558029; rt=7.16398)**  
T/S Cluster: L-7.2-1

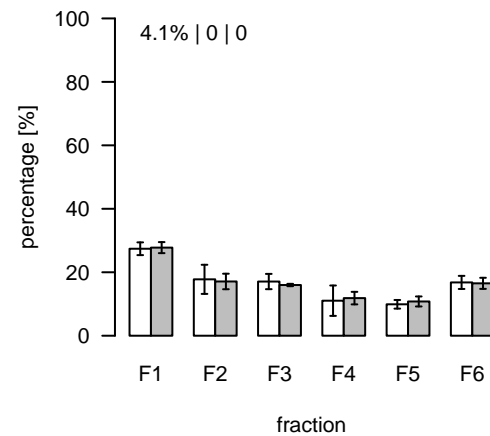

**L1263 (m/z=366.78838; rt=7.16412)**  
T/S Cluster: L-7.2-1

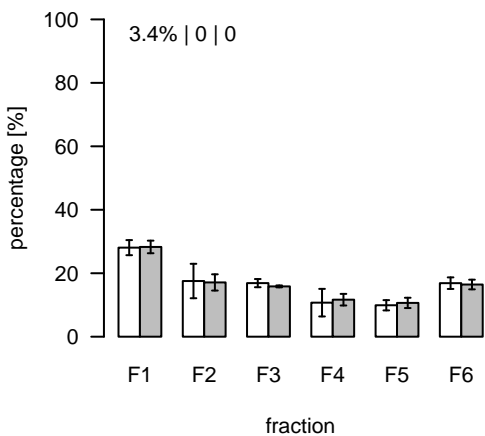

**L1256 (m/z=749.592436; rt=7.16143)**  
T/S Cluster: L-7.2-1

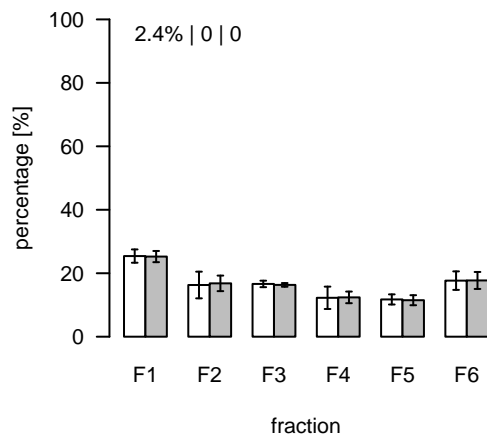

**L1260 (m/z=366.78349; rt=7.16401)**  
T/S Cluster: L-7.2-1

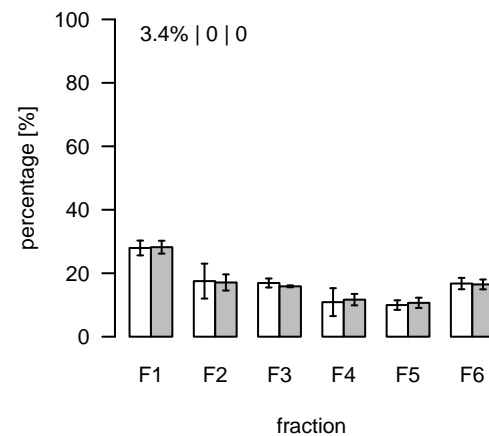

**L1286 (m/z=859.673817; rt=7.22245)**  
T/S Cluster: L-7.2-1

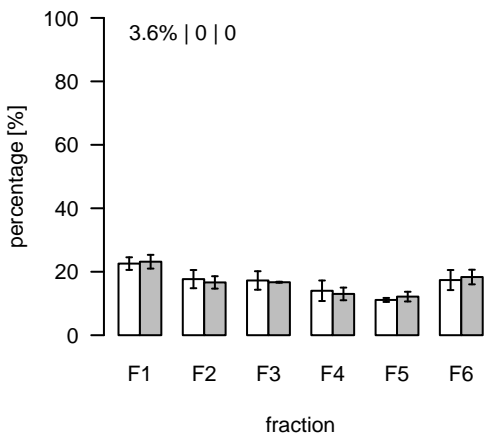

**L1258 (m/z=244.191717; rt=7.16393)**  
T/S Cluster: L-7.2-1

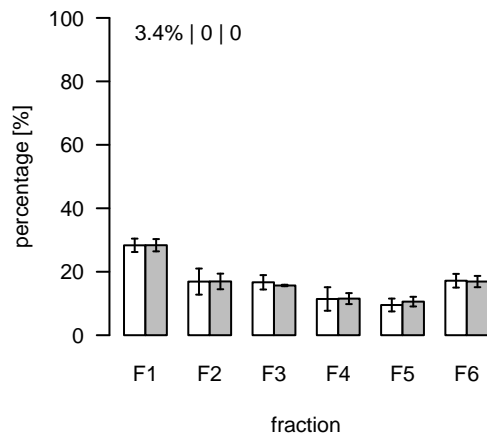

**L1268 (m/z=570.511571; rt=7.16476)**  
T/S Cluster: L-7.2-1

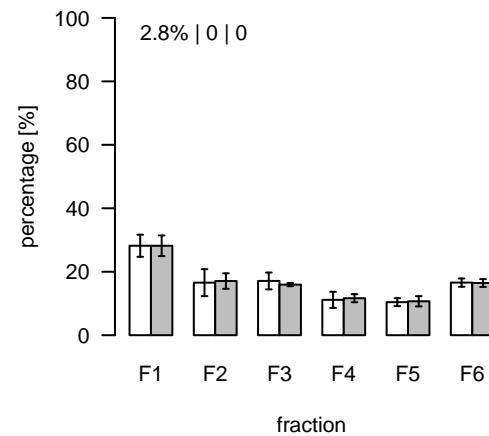

**L1270 (m/z=754.546397; rt=7.18767)**  
T/S Cluster: L-7.2-2

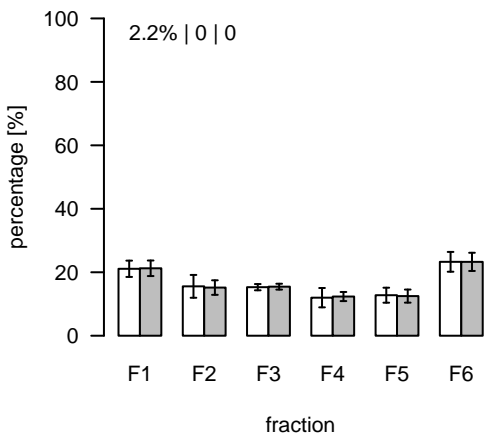

**L1282 (m/z=754.524979; rt=7.19011)**  
T/S Cluster: L-7.2-2

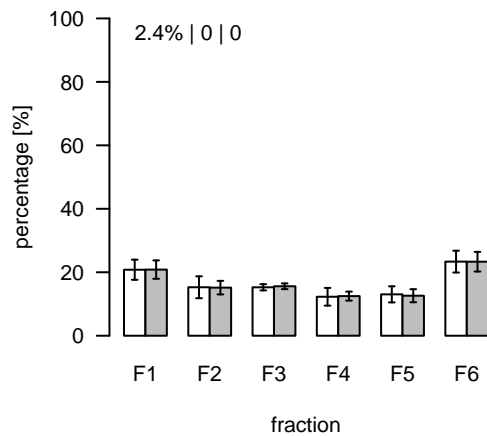

**L1269 (m/z=755.551654; rt=7.1874)**  
T/S Cluster: L-7.2-2

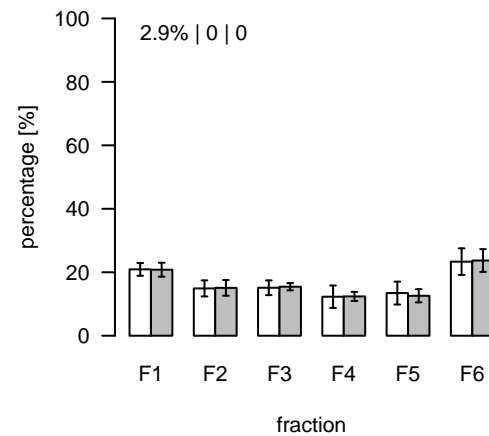

**L1278 (m/z=755.53193; rt=7.1899)**  
T/S Cluster: L-7.2-2

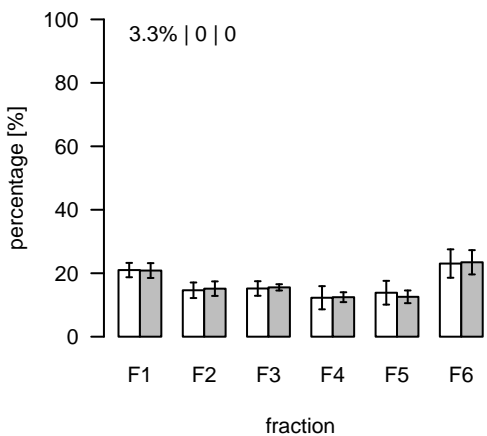

**L1274 (m/z=766.549827; rt=7.18897)**  
T/S Cluster: L-7.2-3

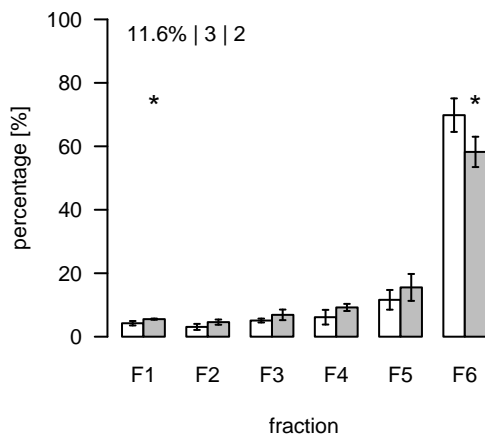

**L1271 (m/z=767.553517; rt=7.18875)**  
T/S Cluster: L-7.2-3

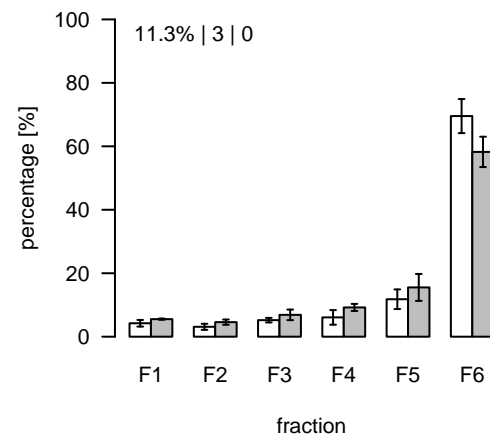

**L1279 (m/z=771.509089; rt=7.18994)**  
T/S Cluster: L-7.2-3

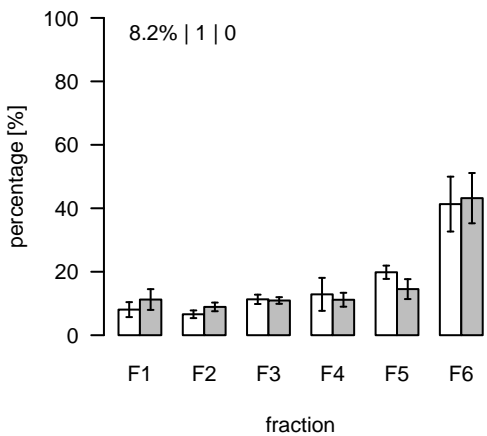

**L1277 (m/z=771.489636; rt=7.18987)**  
T/S Cluster: L-7.2-3

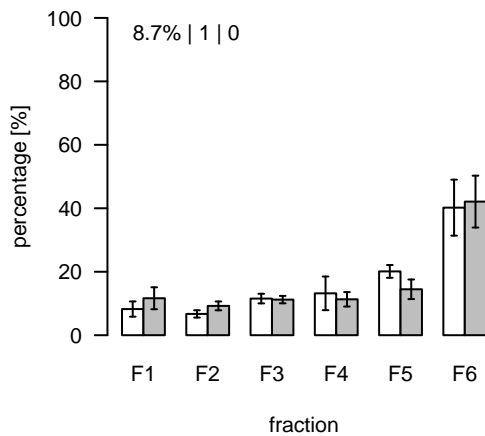

**L1272 (m/z=767.517969; rt=7.18886)**  
T/S Cluster: L-7.2-3

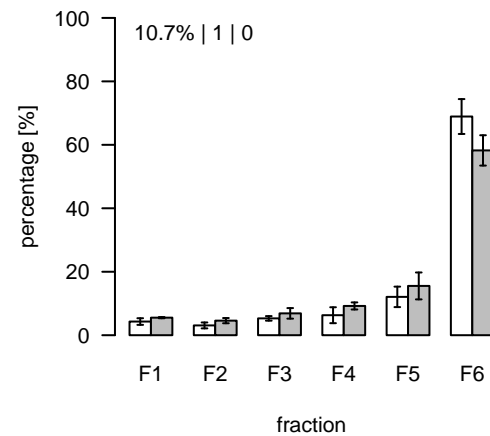

**L1275 (m/z=766.503555; rt=7.18897)**  
T/S Cluster: L-7.2-3

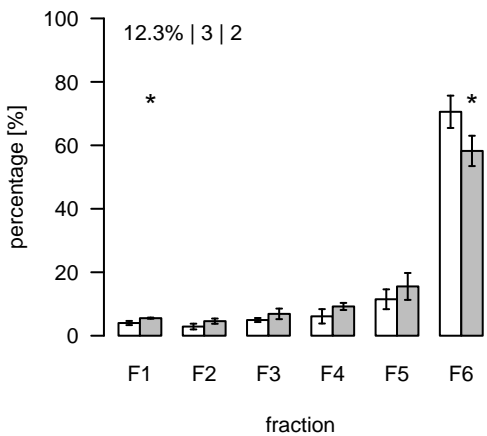

**L1281 (m/z=772.515773; rt=7.19008)**  
T/S Cluster: L-7.2-3

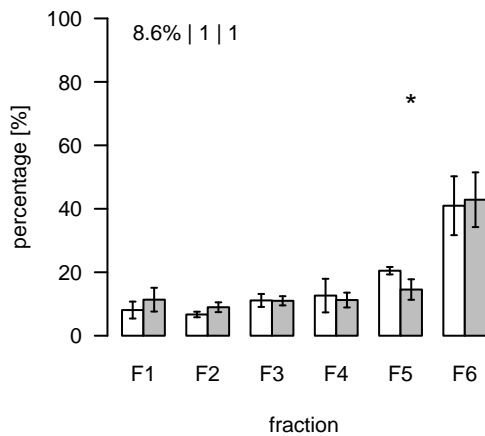

**L1283 (m/z=772.508637; rt=7.19016)**  
T/S Cluster: L-7.2-3

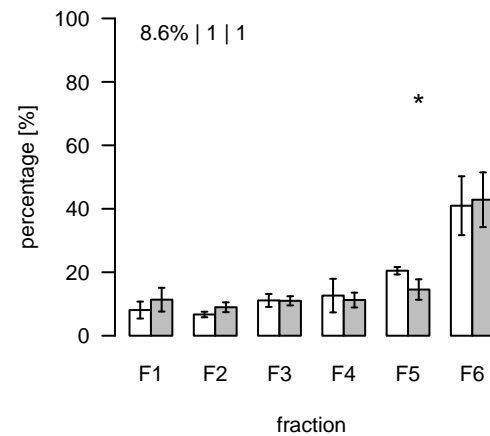

**L1276 (m/z=383.276107; rt=7.18909)**  
T/S Cluster: L-7.2-3

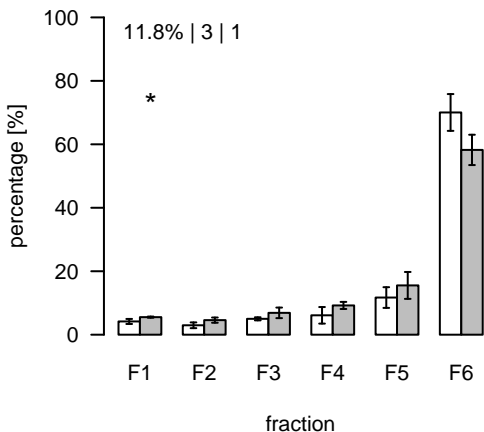

**L1280 (m/z=772.535736; rt=7.18995)**  
T/S Cluster: L-7.2-3

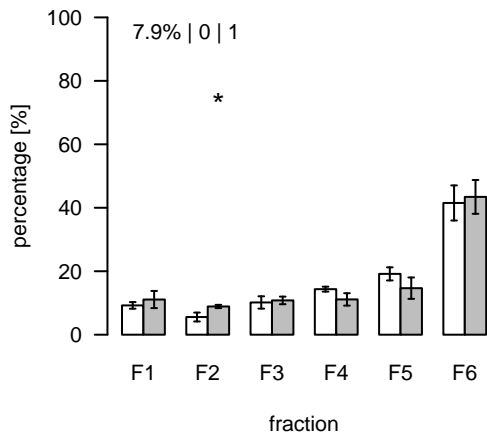

**L1273 (m/z=768.557056; rt=7.18896)**  
T/S Cluster: L-7.2-3

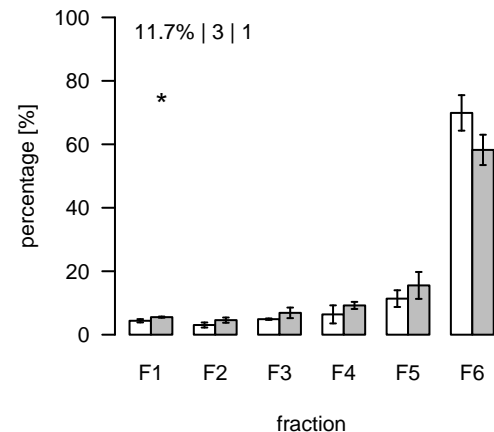

**L1285 (m/z=923.522459; rt=7.2006)**  
T/S Cluster: L-7.2-4

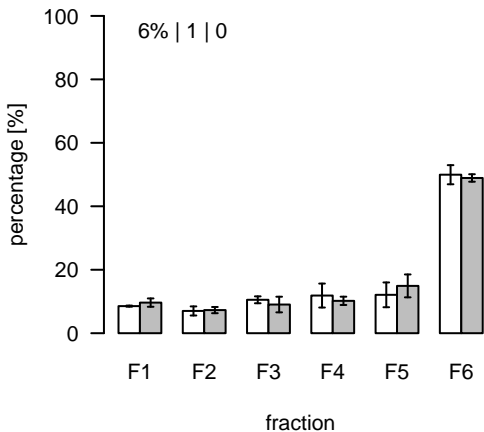

**L1284 (m/z=923.502181; rt=7.19938)**  
T/S Cluster: L-7.2-4

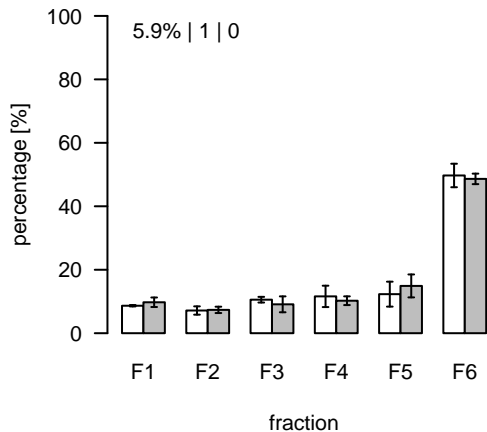

**L1287 (m/z=774.509552; rt=7.22525)**  
T/S Cluster: L-7.2-5

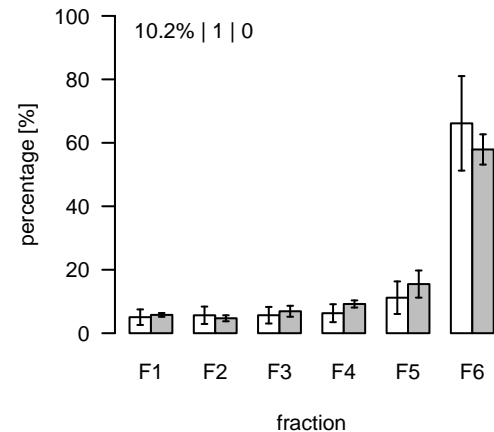

**L1289 (m/z=774.542927; rt=7.24356)**  
T/S Cluster: L-7.2-6

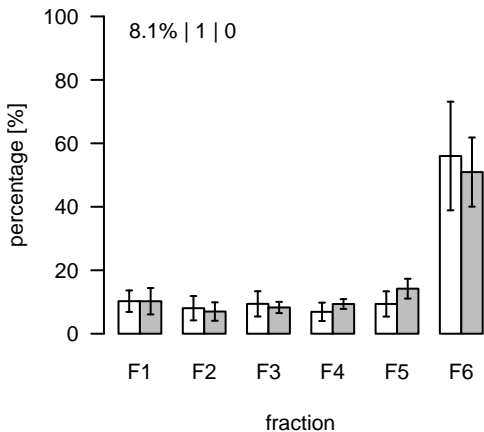

**L1290 (m/z=856.654898; rt=7.27635)**  
T/S Cluster: L-7.3-1

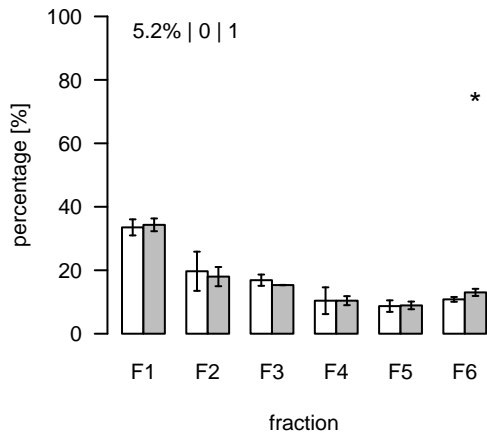

**L1291 (m/z=857.657742; rt=7.27637)**  
T/S Cluster: L-7.3-1

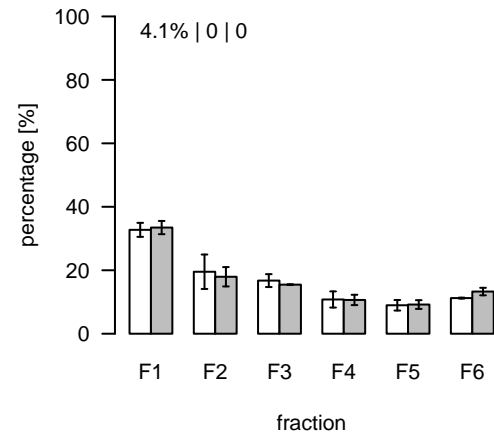

**L1292 (m/z=836.55925; rt=7.27801)**  
T/S Cluster: L-7.3-2

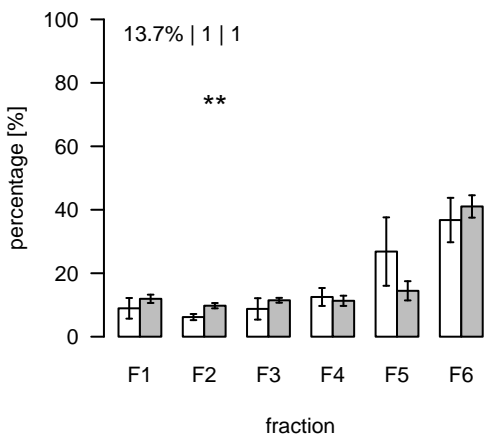

**L1344 (m/z=792.565615; rt=7.34734)**  
T/S Cluster: L-7.3-3

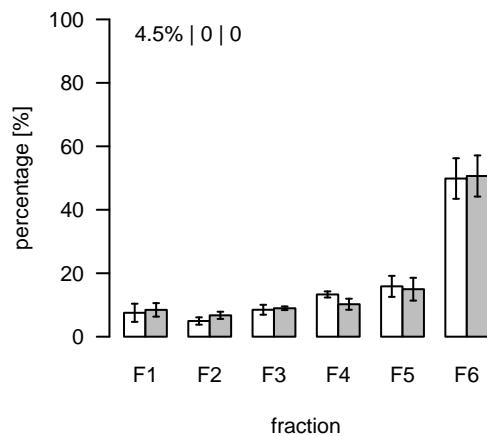

**L1338 (m/z=793.569408; rt=7.34708)**  
T/S Cluster: L-7.3-3

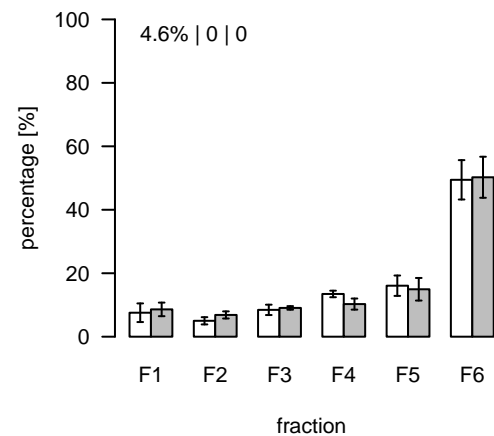

**L1336 (m/z=794.573786; rt=7.34701)**  
T/S Cluster: L-7.3-3

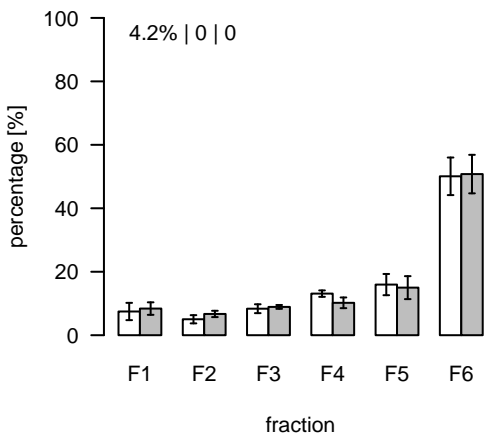

**L1342 (m/z=396.28403; rt=7.34733)**  
T/S Cluster: L-7.3-3

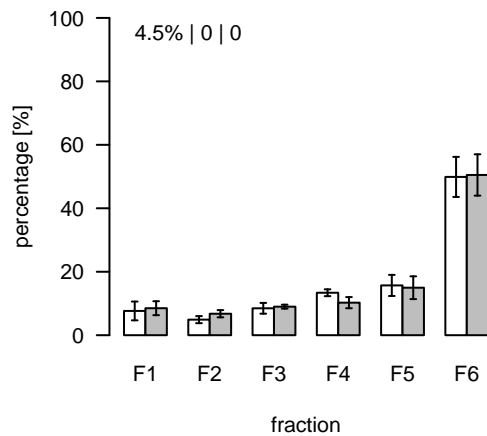

**L1300 (m/z=956.637584; rt=7.30049)**  
T/S Cluster: L-7.3-3

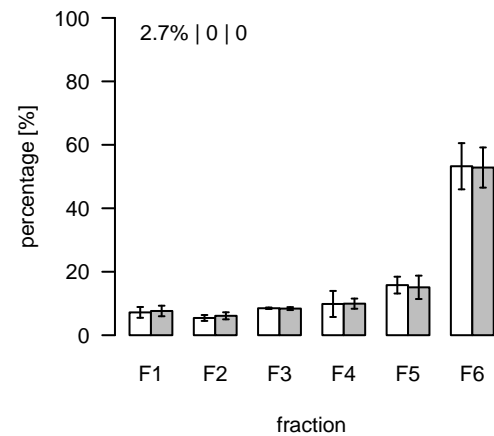

**L1343 (m/z=794.538988; rt=7.34733)**  
T/S Cluster: L-7.3-3

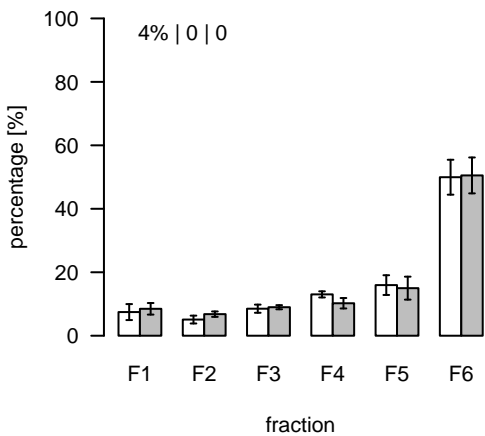

**L1340 (m/z=396.786079; rt=7.34725)**  
T/S Cluster: L-7.3-3

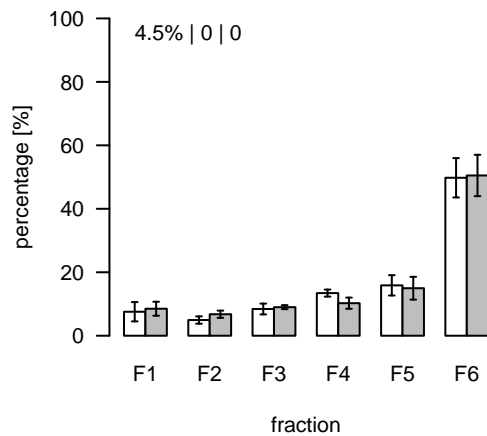

**L1293 (m/z=956.636399; rt=7.28354)**  
T/S Cluster: L-7.3-3

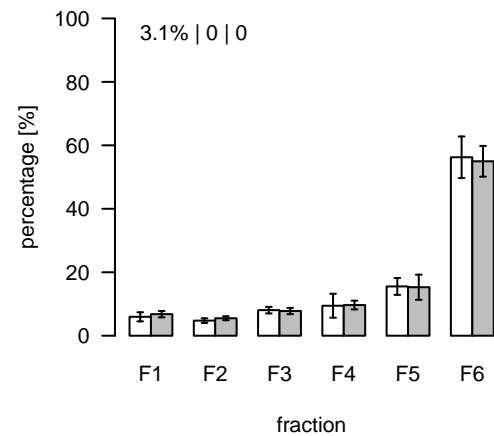

**L1341 (m/z=264.192636; rt=7.34732)**  
T/S Cluster: L-7.3-3

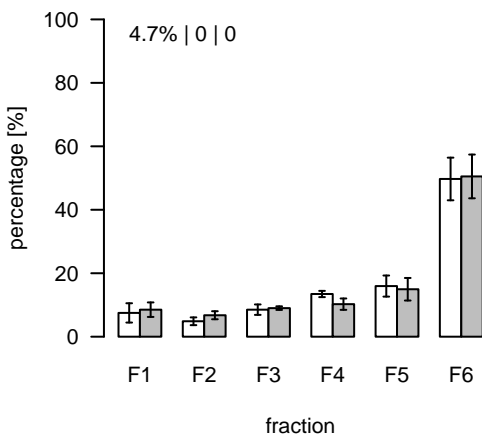

**L1301 (m/z=957.640988; rt=7.30054)**  
T/S Cluster: L-7.3-3

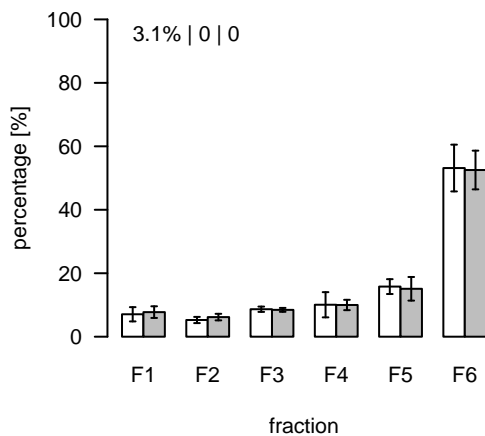

**L1347 (m/z=613.486802; rt=7.34761)**  
T/S Cluster: L-7.3-3

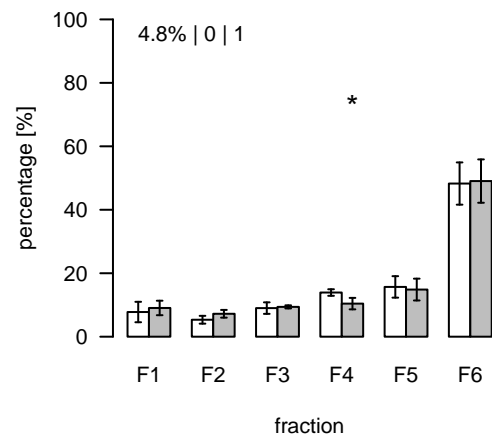

**L1335 (m/z=795.577133; rt=7.34697)**  
T/S Cluster: L-7.3-3

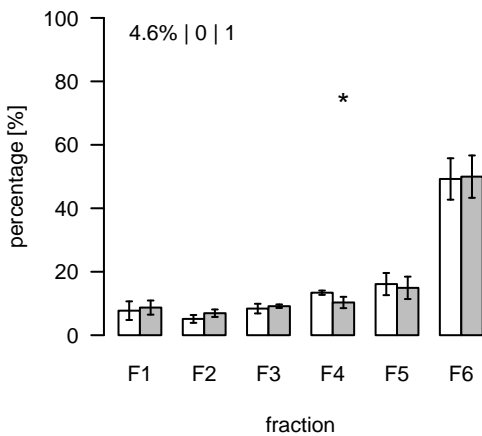

**L1348 (m/z=335.259619; rt=7.34793)**  
T/S Cluster: L-7.3-3

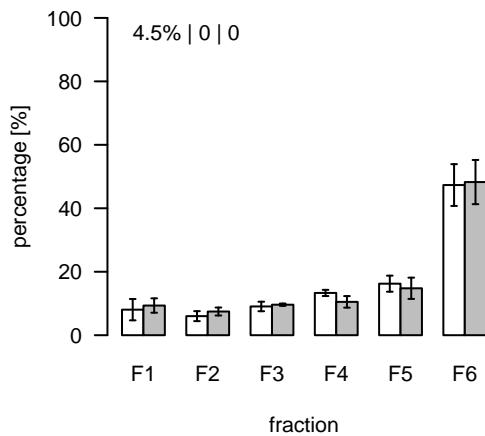

**L1334 (m/z=264.527419; rt=7.34693)**  
T/S Cluster: L-7.3-3

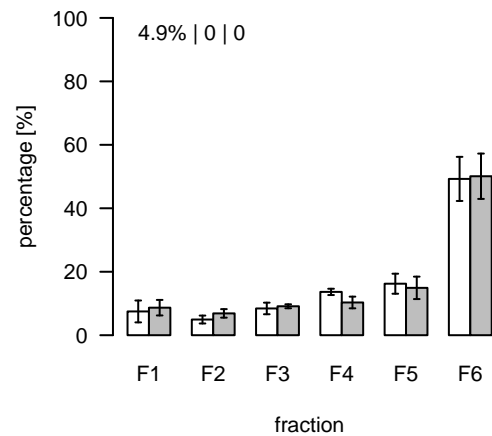

**L1298 (m/z=957.593846; rt=7.29922)**  
T/S Cluster: L-7.3-3

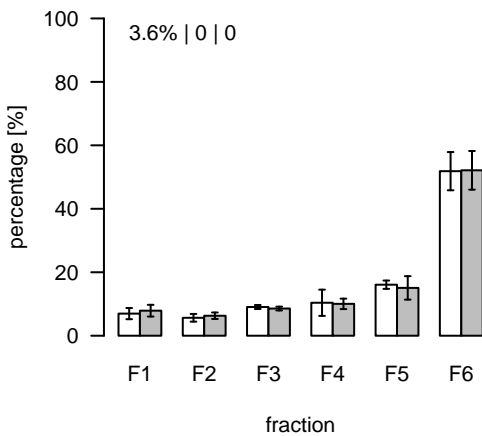

**L1349 (m/z=613.468058; rt=7.34797)**  
T/S Cluster: L-7.3-3

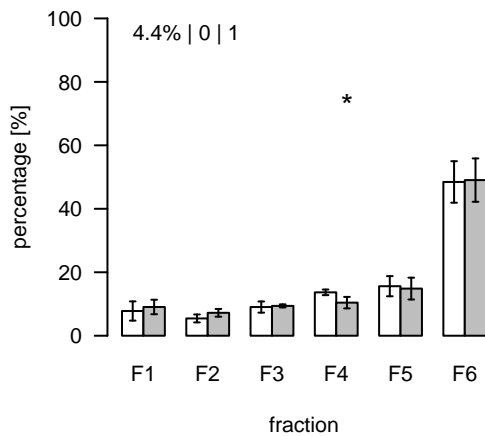

**L1350 (m/z=335.255486; rt=7.34817)**  
T/S Cluster: L-7.3-3

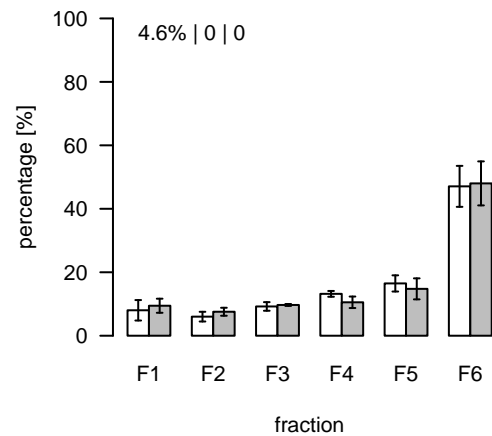



**L1337 (m/z=795.549903; rt=7.34705)**  
T/S Cluster: L-7.3-3

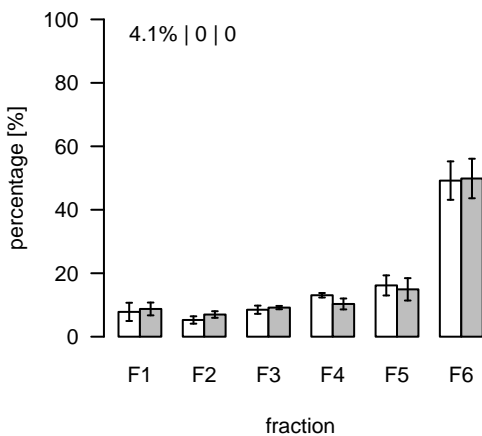

**L1297 (m/z=956.569608; rt=7.29869)**  
T/S Cluster: L-7.3-3

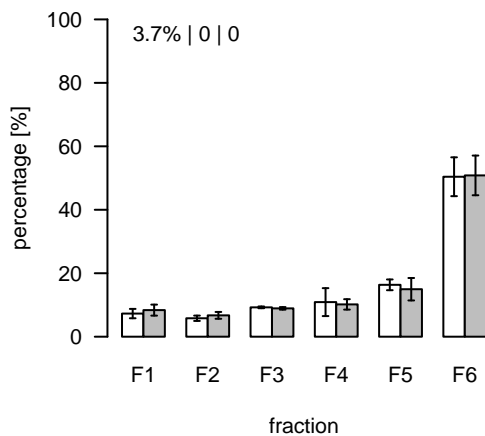

**L1339 (m/z=397.287806; rt=7.34716)**  
T/S Cluster: L-7.3-3

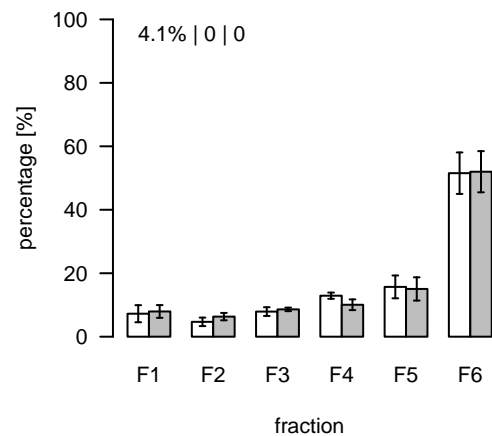

**L1299 (m/z=958.643937; rt=7.30007)**  
T/S Cluster: L-7.3-3

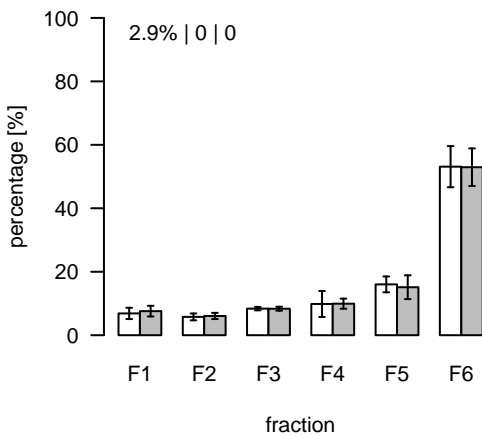

**L1332 (m/z=264.198037; rt=7.34536)**  
T/S Cluster: L-7.3-3

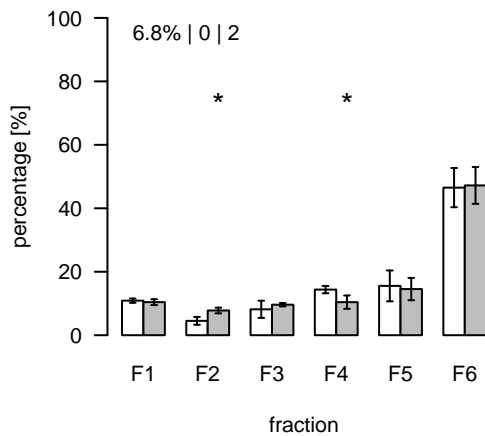

**L1351 (m/z=264.522143; rt=7.34836)**  
T/S Cluster: L-7.3-3

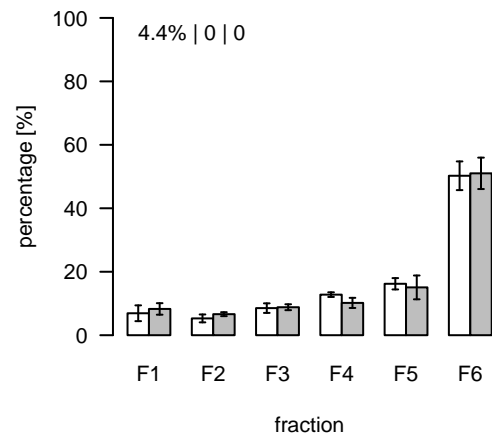

**L1333 (m/z=264.531701; rt=7.34551)**  
T/S Cluster: L-7.3-3

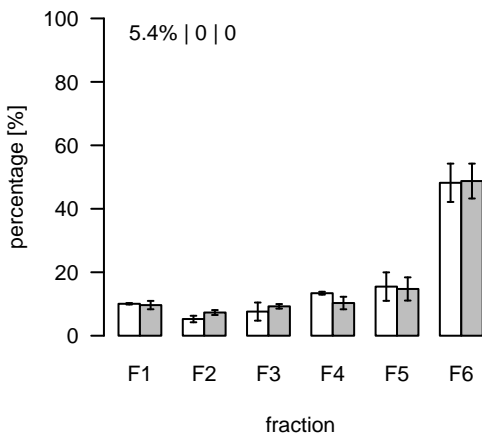

**L1345 (m/z=614.49009; rt=7.34738)**  
T/S Cluster: L-7.3-3

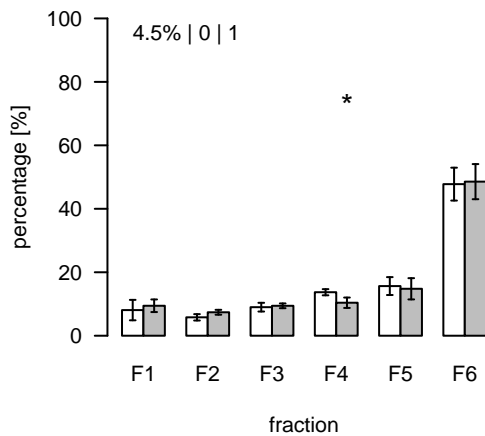

**L1346 (m/z=614.48004; rt=7.34755)**  
T/S Cluster: L-7.3-3

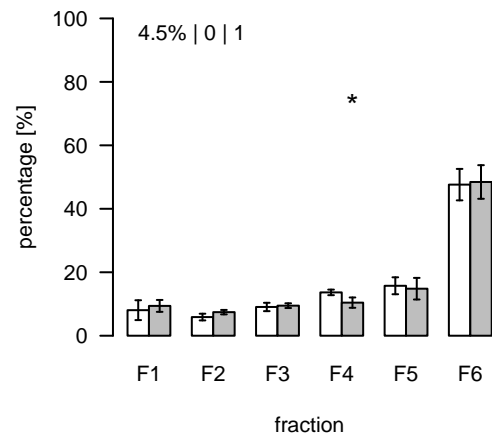

**L1330 (m/z=788.592872; rt=7.34077)**  
T/S Cluster: L-7.3-3

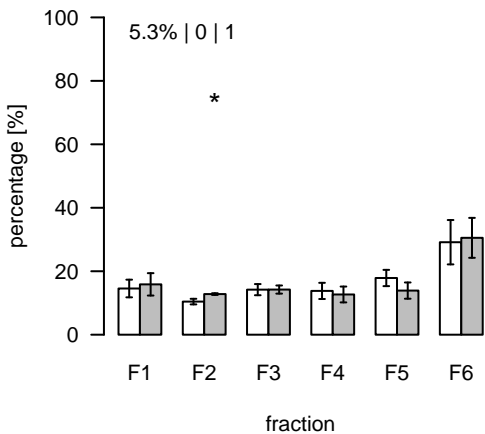

**L1296 (m/z=790.608578; rt=7.29597)**  
T/S Cluster: L-7.3-3

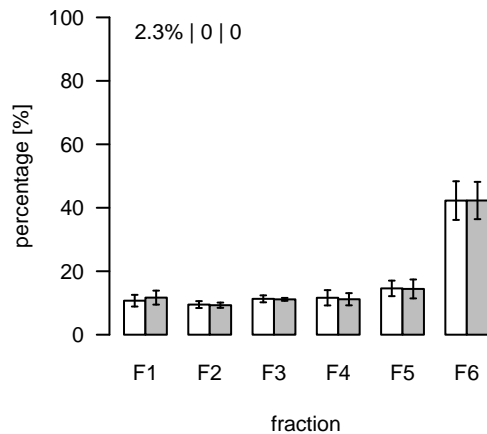

**L1294 (m/z=800.550555; rt=7.28624)**  
T/S Cluster: L-7.3-4

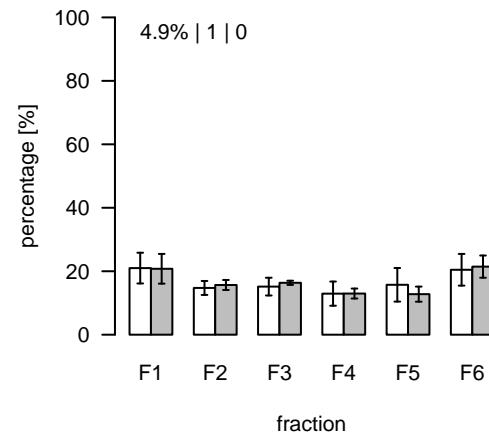

**L1321 (m/z=780.557124; rt=7.32863)**  
T/S Cluster: L-7.3-5

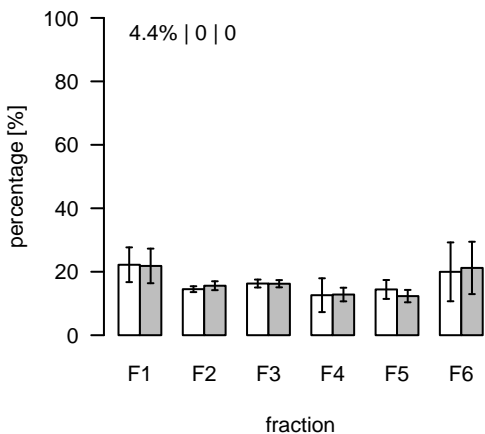

**L1319 (m/z=781.561556; rt=7.32848)**  
T/S Cluster: L-7.3-5

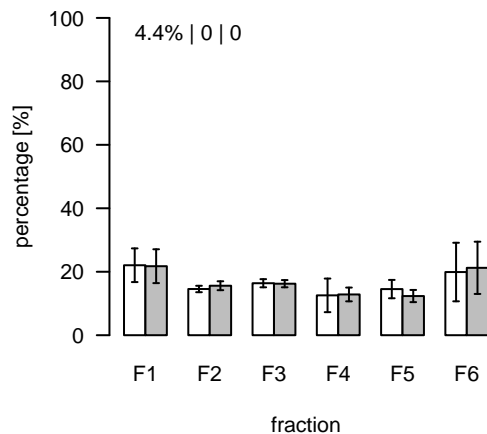

**L1325 (m/z=390.280195; rt=7.32899)**  
T/S Cluster: L-7.3-5

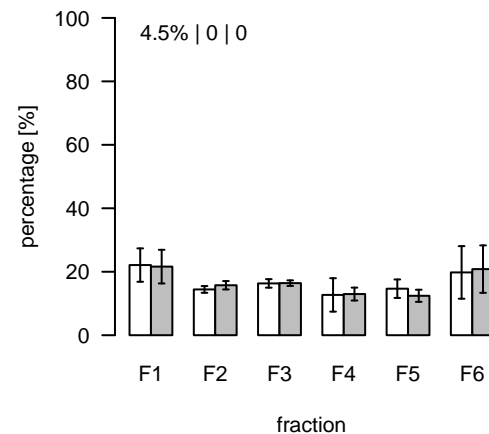

**L1317 (m/z=782.565799; rt=7.32841)**  
T/S Cluster: L-7.3-5

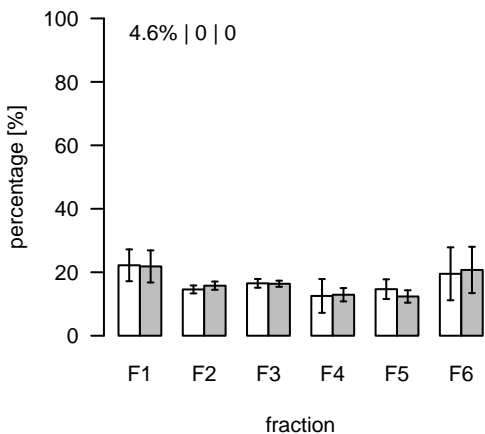

**L1314 (m/z=782.53386; rt=7.32823)**  
T/S Cluster: L-7.3-5

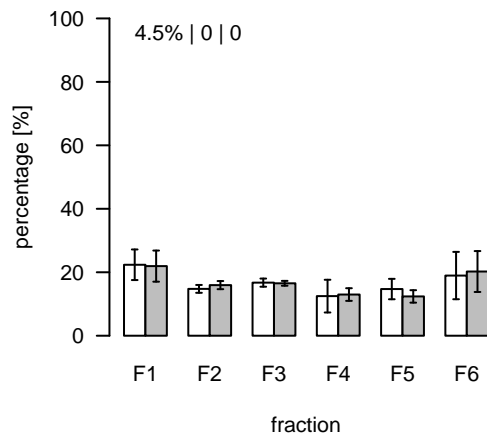

**L1323 (m/z=390.782055; rt=7.32868)**  
T/S Cluster: L-7.3-5

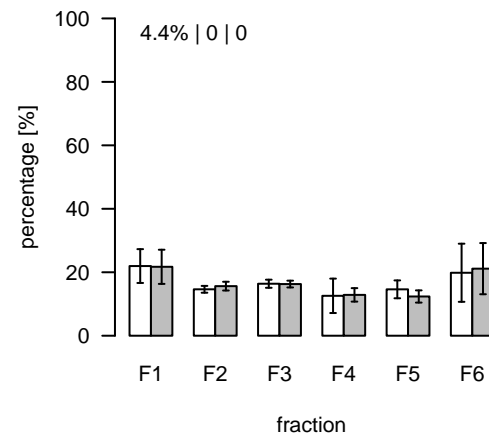

**L1320 (m/z=781.506144; rt=7.3285)**  
T/S Cluster: L-7.3-5

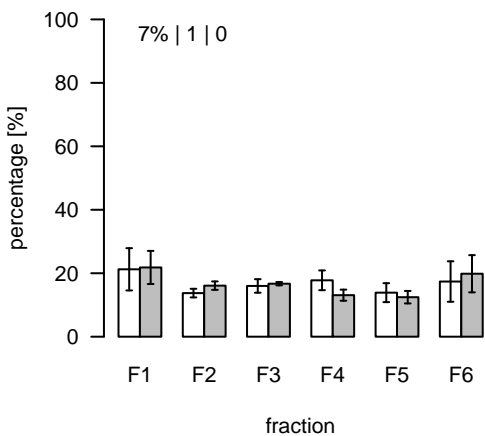

**L1322 (m/z=260.189803; rt=7.32865)**  
T/S Cluster: L-7.3-5

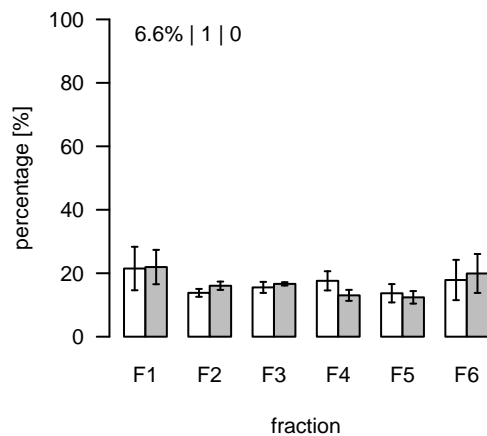

**L1295 (m/z=780.501717; rt=7.29025)**  
T/S Cluster: L-7.3-5

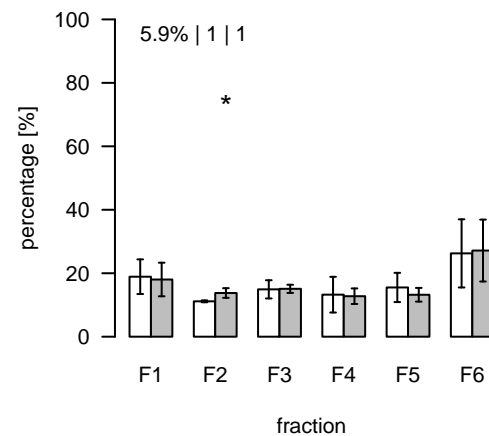

**L1324 (m/z=783.568412; rt=7.32875)**  
T/S Cluster: L-7.3-5

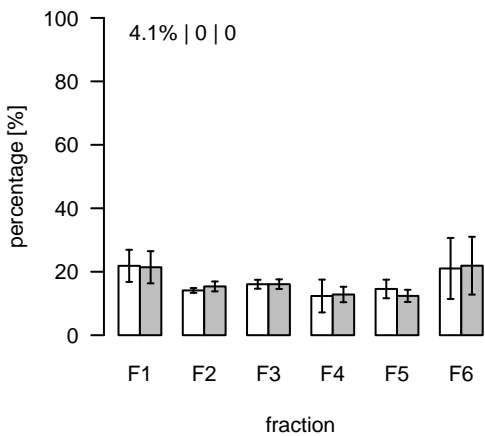

**L1318 (m/z=260.524438; rt=7.32843)**  
T/S Cluster: L-7.3-5

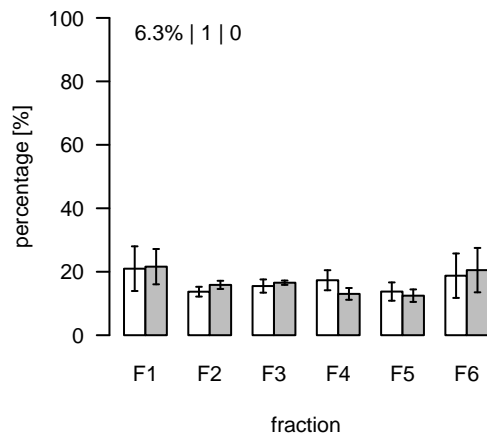

**L1326 (m/z=391.281617; rt=7.33026)**  
T/S Cluster: L-7.3-5

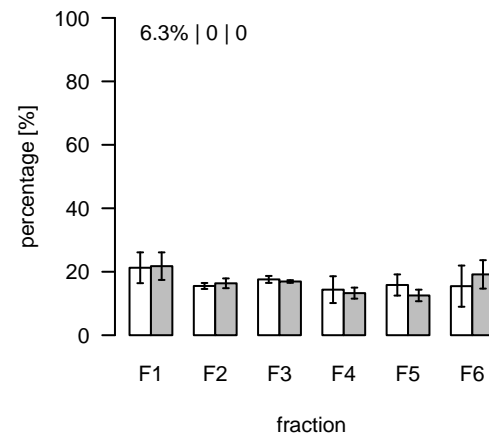

**L1327 (m/z=391.287516; rt=7.33094)**  
T/S Cluster: L-7.3-5

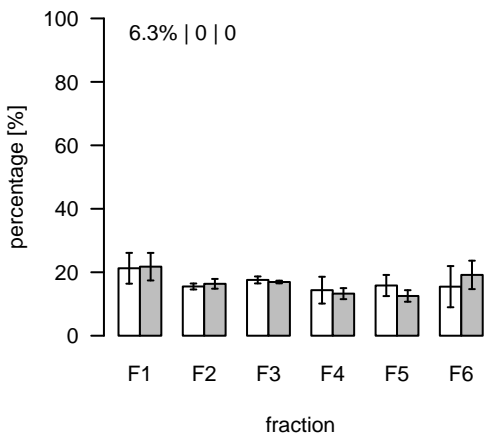

**L1311 (m/z=390.76957; rt=7.32757)**  
T/S Cluster: L-7.3-5

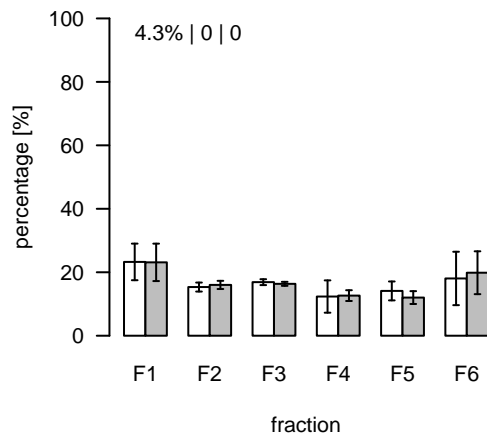

**L1310 (m/z=260.520444; rt=7.32736)**  
T/S Cluster: L-7.3-5

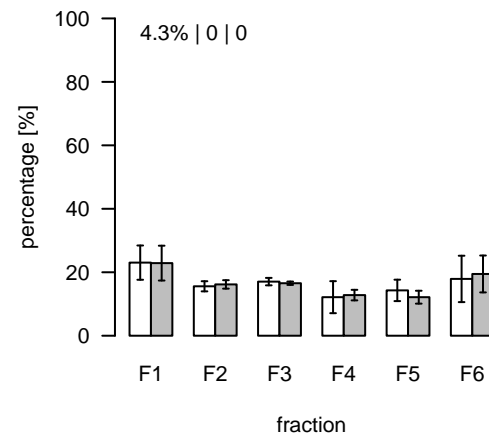

**L1312 (m/z=260.183004; rt=7.32795)**  
T/S Cluster: L-7.3-5

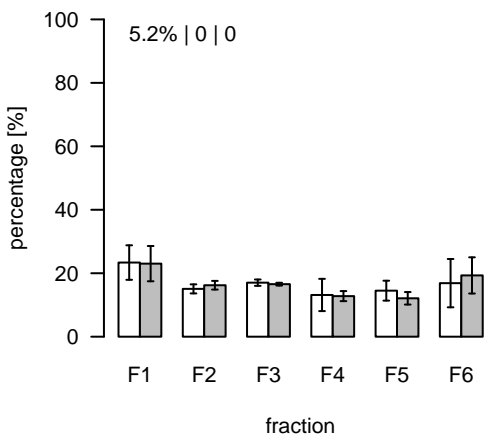

**L1316 (m/z=781.636824; rt=7.32833)**  
T/S Cluster: L-7.3-5

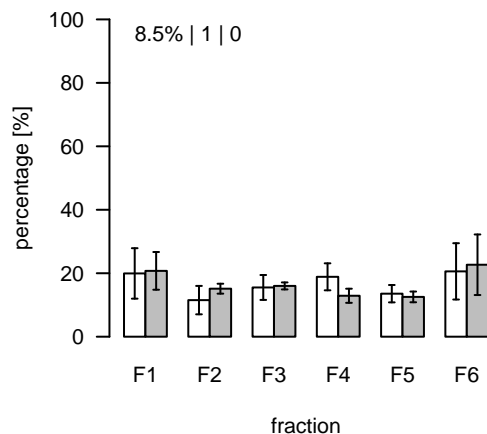

**L1313 (m/z=390.261971; rt=7.32797)**  
T/S Cluster: L-7.3-5

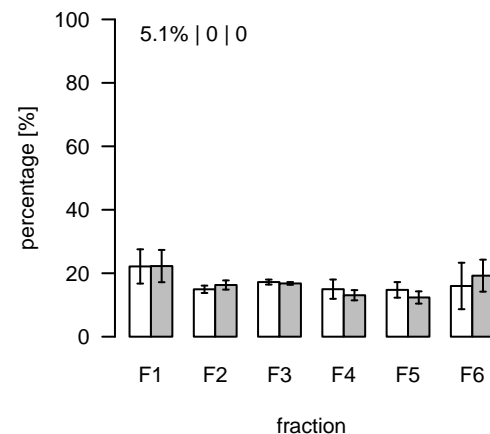

**L1315 (m/z=195.139623; rt=7.32825)**  
T/S Cluster: L-7.3-5

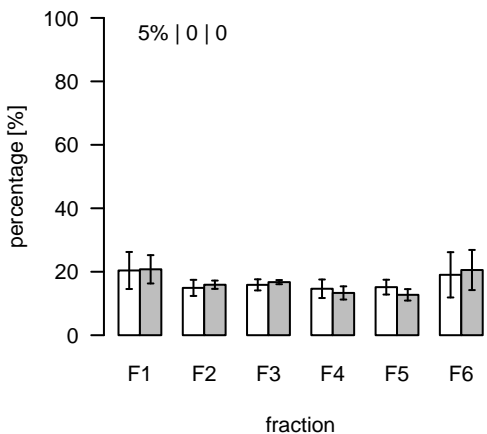

**L1309 (m/z=195.142814; rt=7.32632)**  
T/S Cluster: L-7.3-5

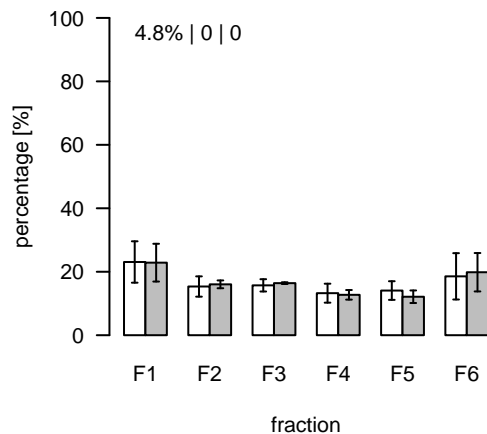

**L1303 (m/z=800.557122; rt=7.31975)**  
T/S Cluster: L-7.3-6

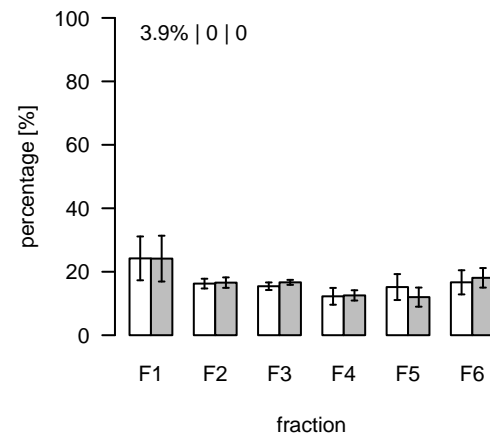

**L1302 (m/z=800.581944; rt=7.30654)**  
T/S Cluster: L-7.3-6

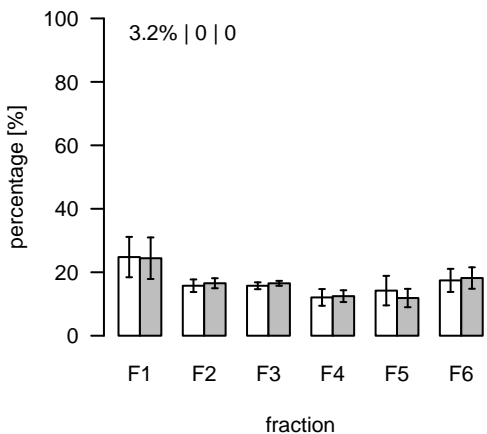

**L1308 (m/z=802.539717; rt=7.32574)**  
T/S Cluster: L-7.3-7

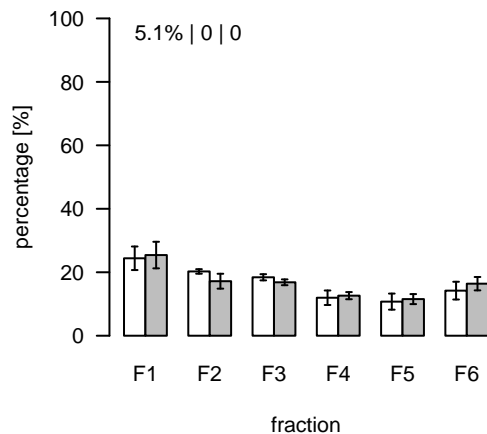

**L1306 (m/z=802.563088; rt=7.3247)**  
T/S Cluster: L-7.3-7

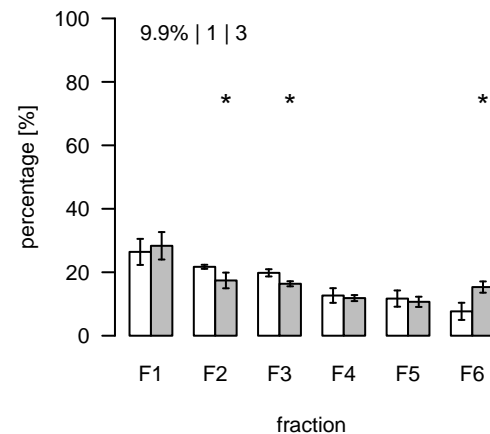

**L1305 (m/z=803.544363; rt=7.32283)**  
T/S Cluster: L-7.3-7

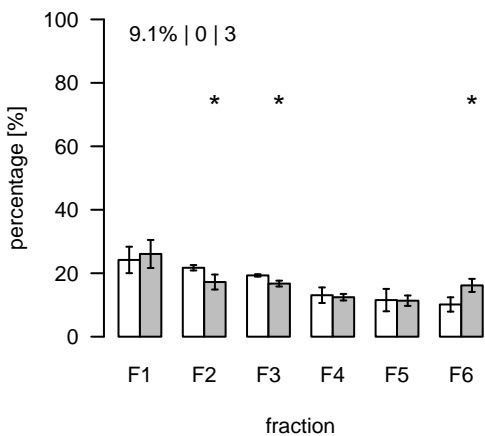

**L1304 (m/z=803.564073; rt=7.32251)**  
T/S Cluster: L-7.3-7

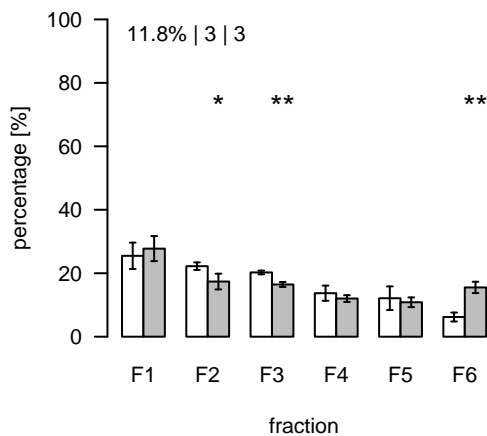

**L1307 (m/z=818.517794; rt=7.32492)**  
T/S Cluster: L-7.3-7

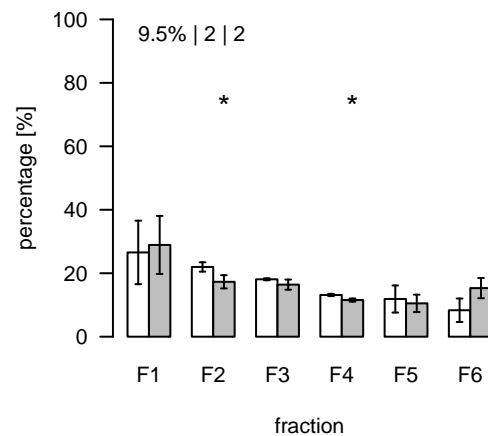

**L1328 (m/z=820.558393; rt=7.33635)**  
T/S Cluster: L-7.3-8

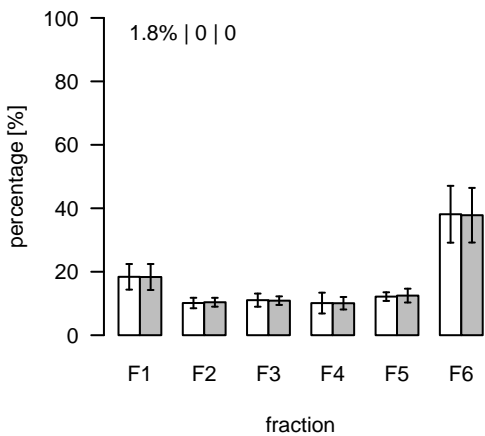

**L1329 (m/z=818.550331; rt=7.33766)**  
T/S Cluster: L-7.3-9

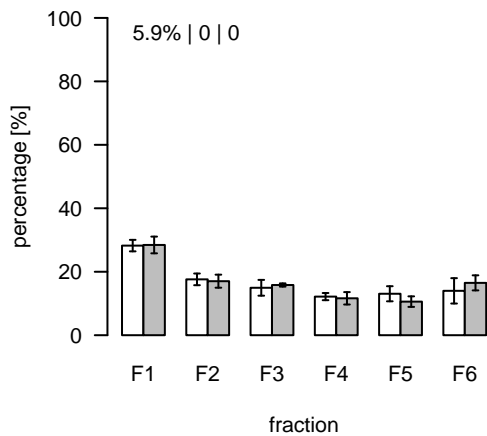

**L1331 (m/z=801.570196; rt=7.34301)**  
T/S Cluster: L-7.3-10

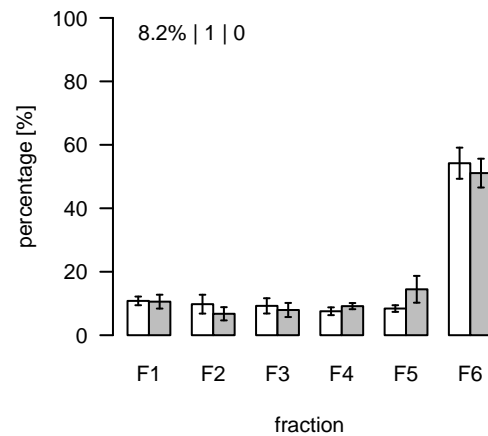

**L1355 (m/z=813.49638; rt=7.34966)**  
T/S Cluster: L-7.3-11

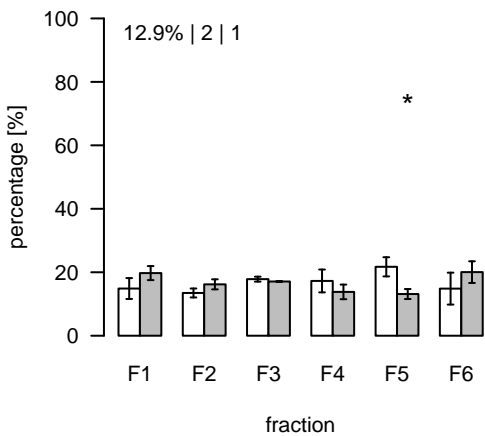

**L1352 (m/z=813.523604; rt=7.3489)**  
T/S Cluster: L-7.3-11

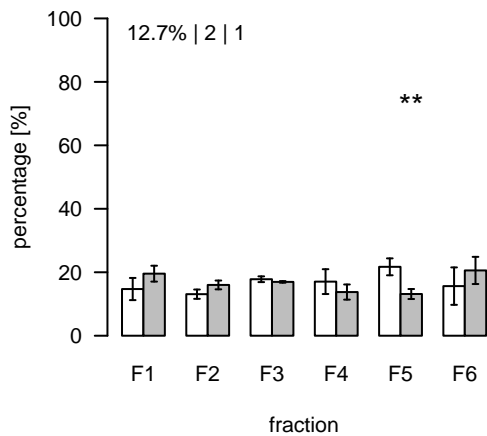

**L1354 (m/z=814.50052; rt=7.34943)**  
T/S Cluster: L-7.3-11

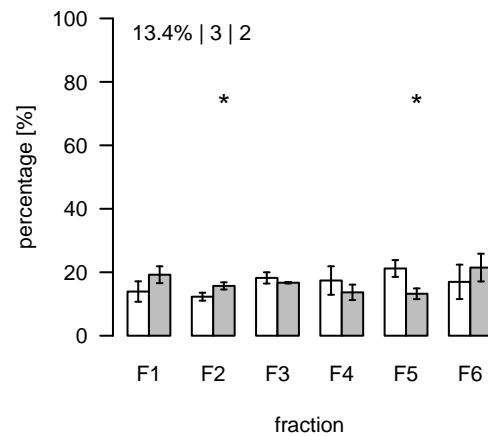

**L1353 (m/z=388.343638; rt=7.34921)**  
T/S Cluster: L-7.3-12

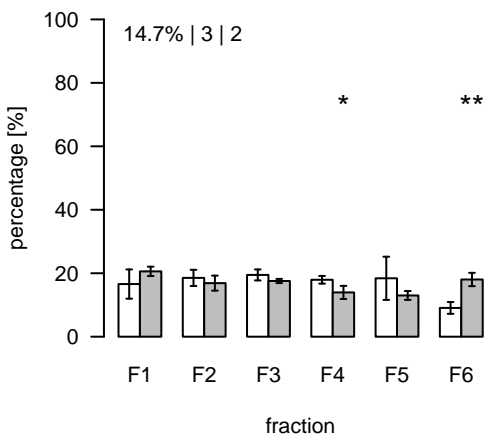

**L1358 (m/z=797.531178; rt=7.35179)**  
T/S Cluster: L-7.4-1

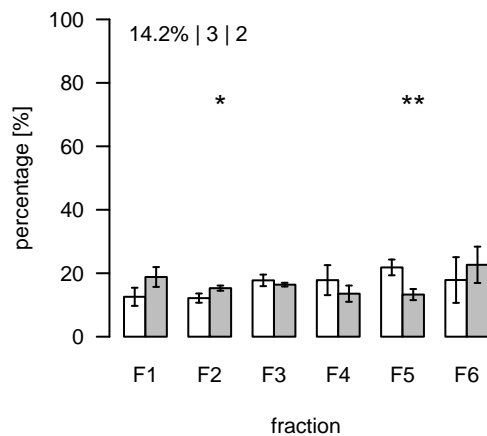

**L1364 (m/z=797.511261; rt=7.35243)**  
T/S Cluster: L-7.4-1

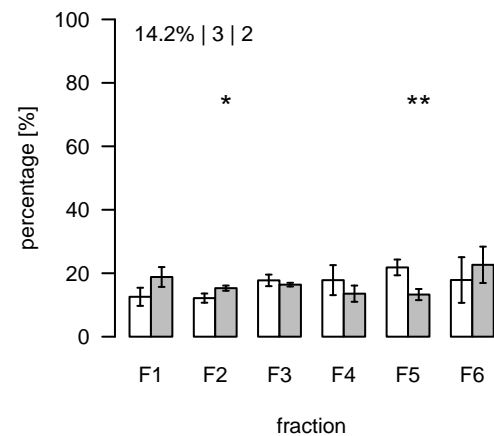

**L1360 (m/z=798.52806; rt=7.35186)**  
T/S Cluster: L-7.4-1

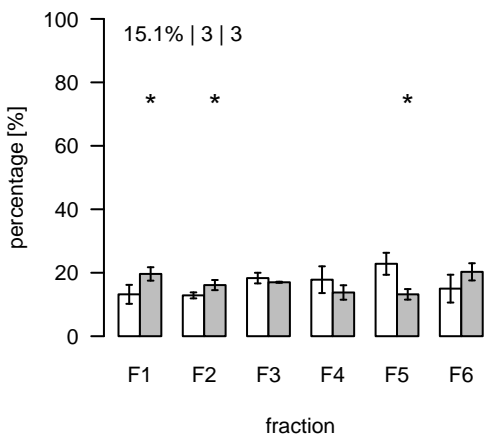

**L1365 (m/z=798.503317; rt=7.35248)**  
T/S Cluster: L-7.4-1

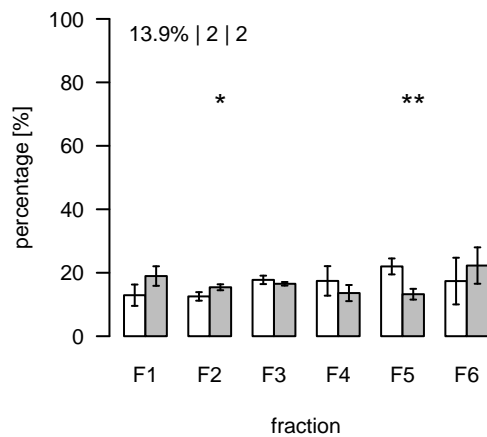

**L1362 (m/z=398.761075; rt=7.35216)**  
T/S Cluster: L-7.4-1

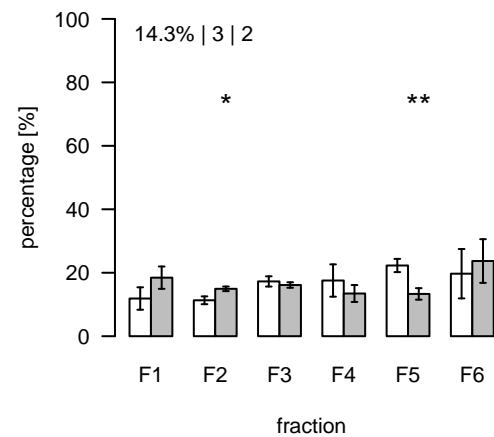

**L1359 (m/z=799.528547; rt=7.35181)**  
T/S Cluster: L-7.4-1

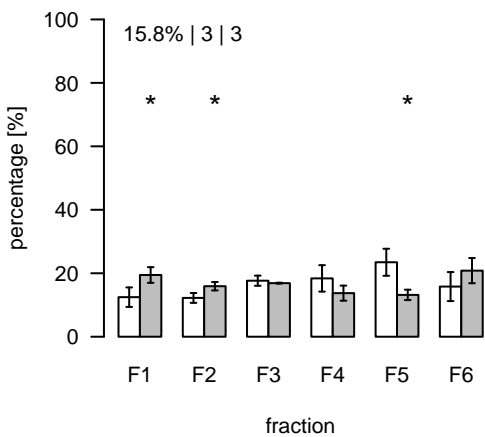

**L1356 (m/z=398.767268; rt=7.35103)**  
T/S Cluster: L-7.4-1

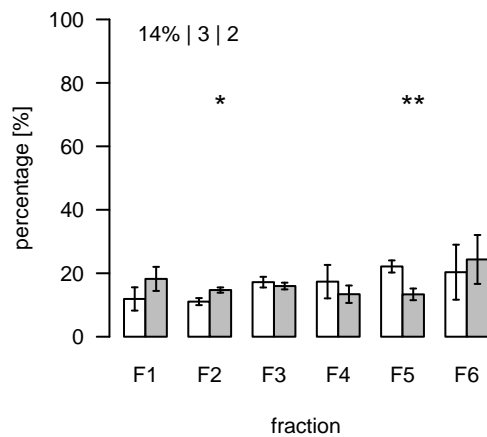

**L1363 (m/z=399.263681; rt=7.35219)**  
T/S Cluster: L-7.4-1

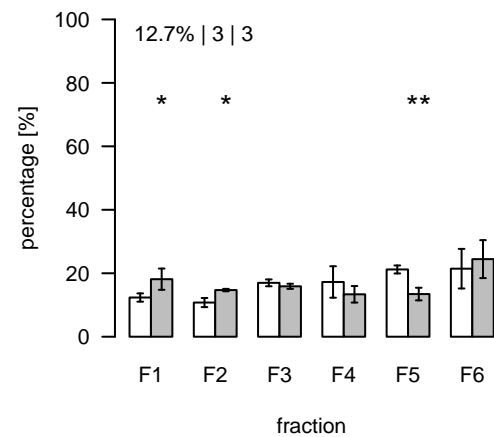

**L1361 (m/z=820.602716; rt=7.35213)**  
T/S Cluster: L-7.4-2

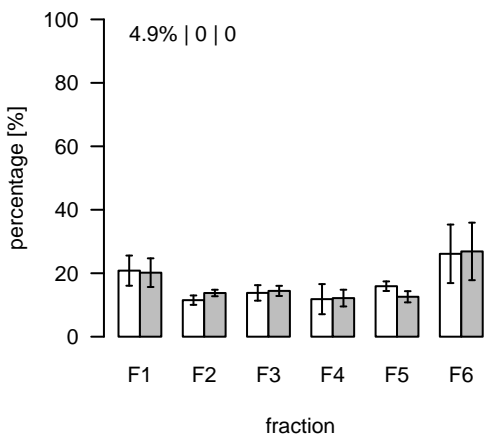

**L1368 (m/z=742.541789; rt=7.41348)**  
T/S Cluster: L-7.4-2

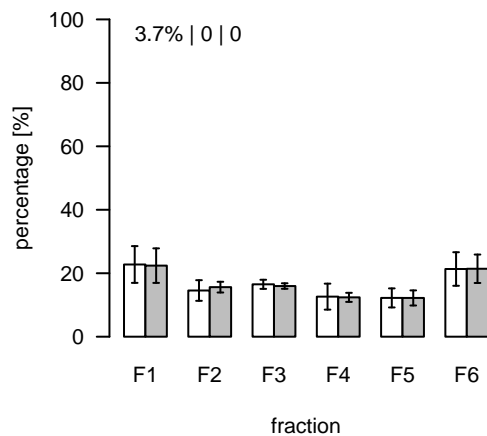

**L1357 (m/z=821.604608; rt=7.35127)**  
T/S Cluster: L-7.4-2

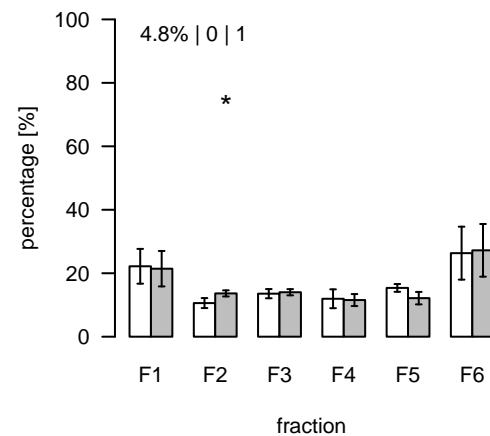

**L1366 (m/z=801.521976; rt=7.39025)**  
T/S Cluster: L-7.4-3

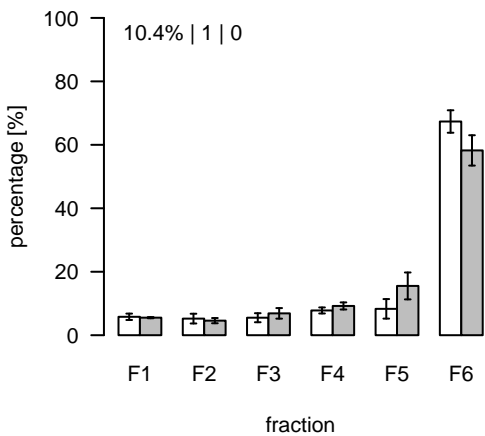

**L1367 (m/z=716.570944; rt=7.40866)**  
T/S Cluster: L-7.4-4

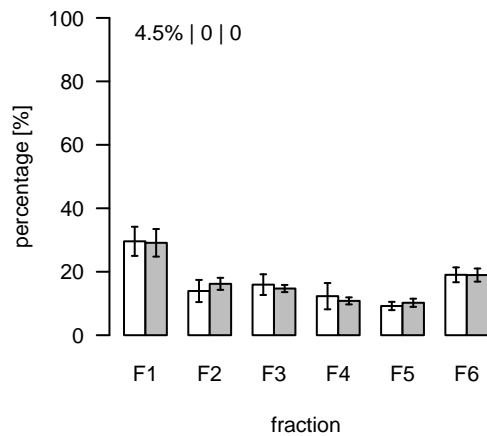

**L1369 (m/z=776.583101; rt=7.47511)**  
T/S Cluster: L-7.5-1

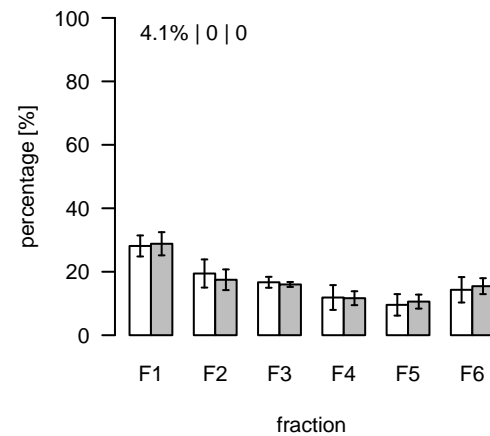

**L1370 (m/z=776.56853; rt=7.47593)**  
T/S Cluster: L-7.5-1

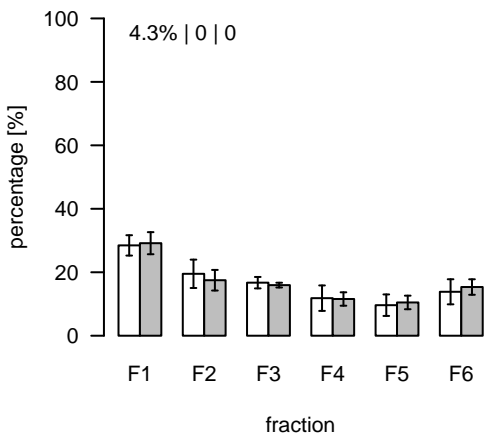

**L1372 (m/z=777.587013; rt=7.47703)**  
T/S Cluster: L-7.5-1

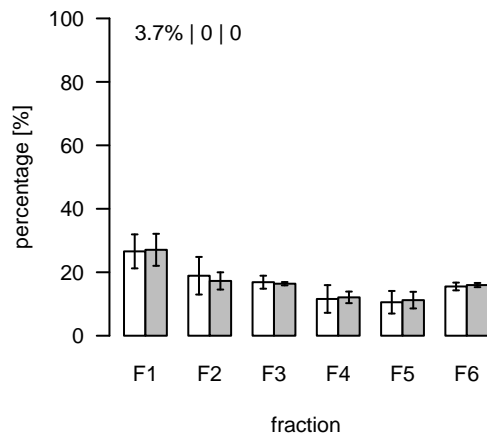

**L1373 (m/z=777.587013; rt=7.47703)**  
T/S Cluster: L-7.5-1

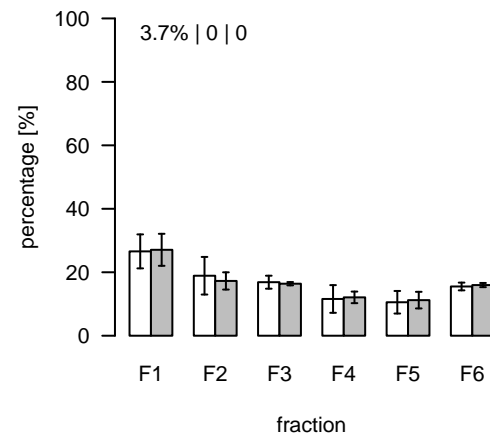

**L1371 (m/z=776.544716; rt=7.47644)**  
T/S Cluster: L-7.5-2

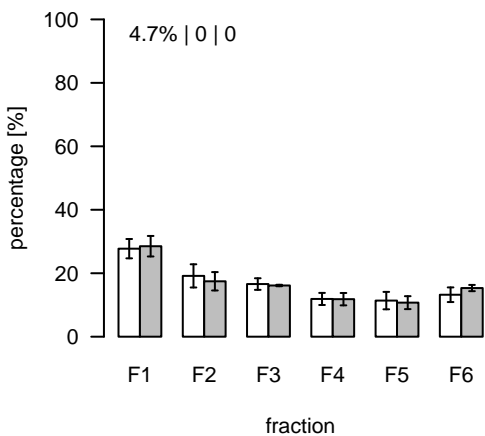

**L1381 (m/z=911.515006; rt=7.53212)**  
T/S Cluster: L-7.5-3

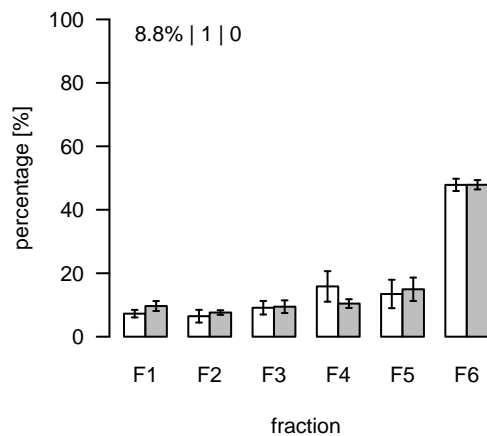

**L1374 (m/z=912.528637; rt=7.49704)**  
T/S Cluster: L-7.5-3

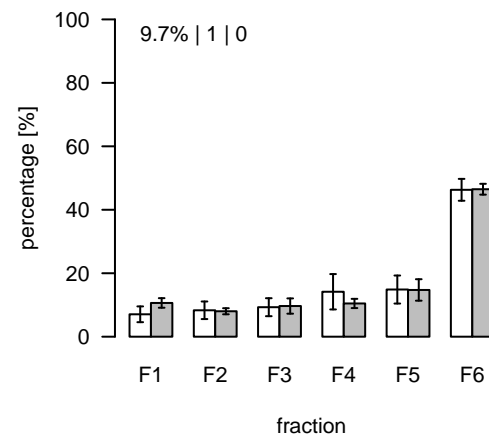

**L1378 (m/z=912.49985; rt=7.50503)**  
T/S Cluster: L-7.5-3

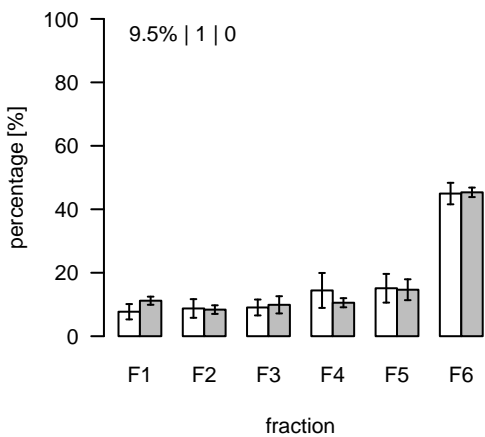

**L1376 (m/z=738.511213; rt=7.50026)**  
T/S Cluster: L-7.5-4

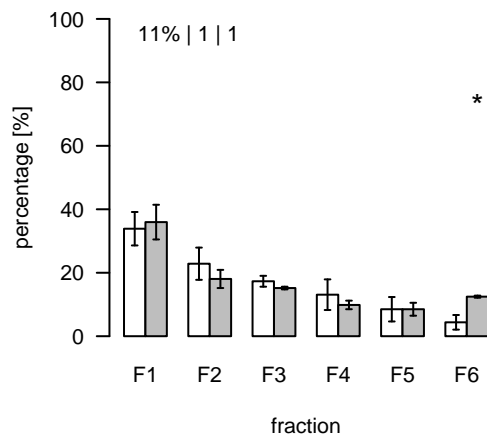

**L1377 (m/z=738.509431; rt=7.50027)**  
T/S Cluster: L-7.5-4

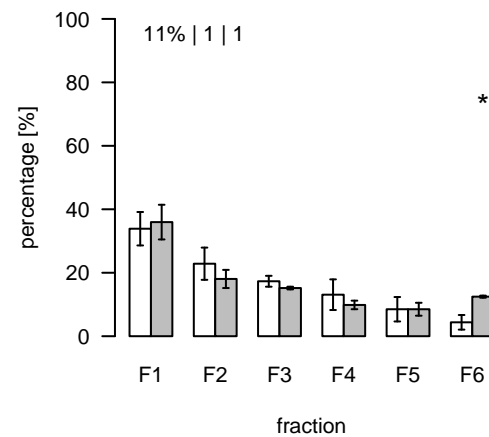

**L1375 (m/z=738.533541; rt=7.49993)**  
T/S Cluster: L-7.5-4

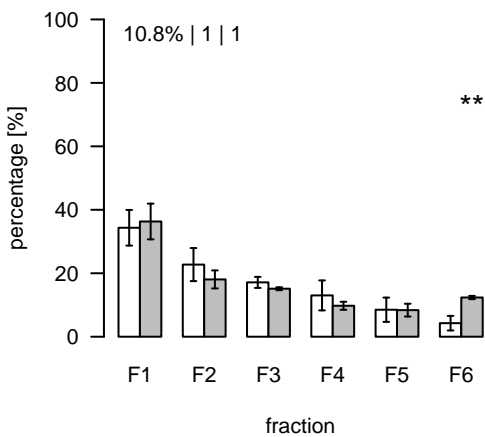

**L1380 (m/z=982.654389; rt=7.52368)**  
T/S Cluster: L-7.5-5

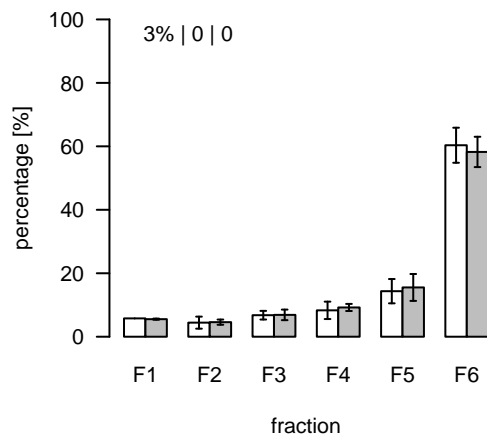

**L1379 (m/z=982.62027; rt=7.52362)**  
T/S Cluster: L-7.5-5

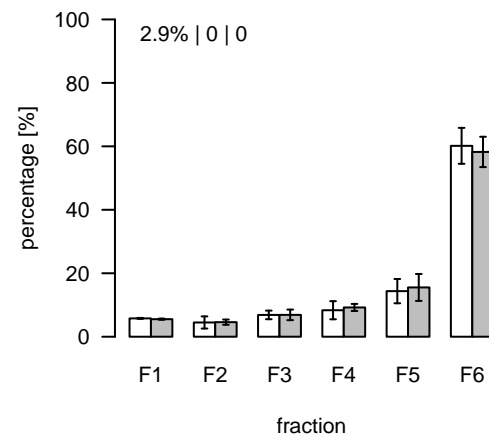



**L1392 (m/z=909.499309; rt=7.58873)**  
T/S Cluster: L-7.6-1

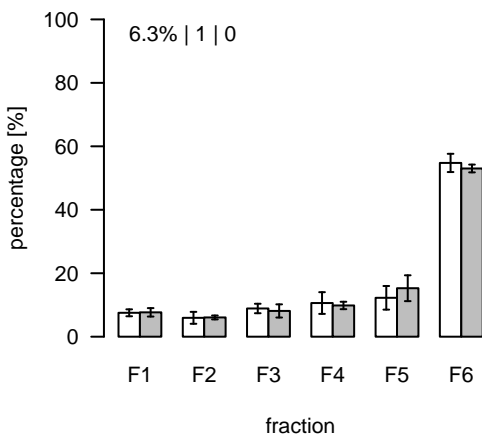

**L1393 (m/z=909.506812; rt=7.5888)**  
T/S Cluster: L-7.6-1

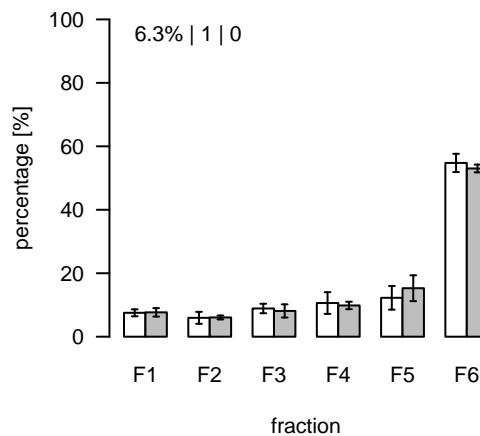

**L1390 (m/z=910.510148; rt=7.58828)**  
T/S Cluster: L-7.6-1

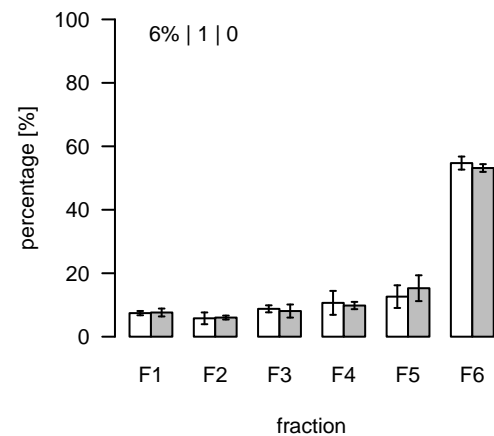

**L1391 (m/z=910.502746; rt=7.58828)**  
T/S Cluster: L-7.6-1

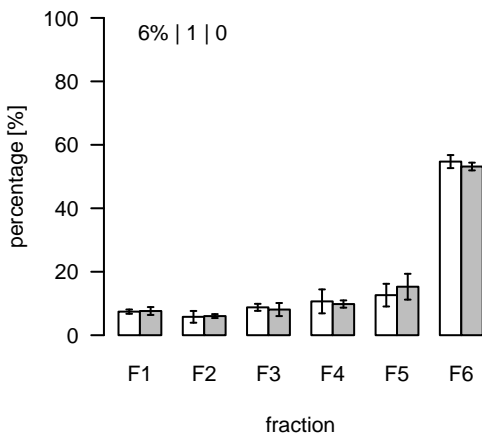

**L1388 (m/z=926.535473; rt=7.58533)**  
T/S Cluster: L-7.6-1

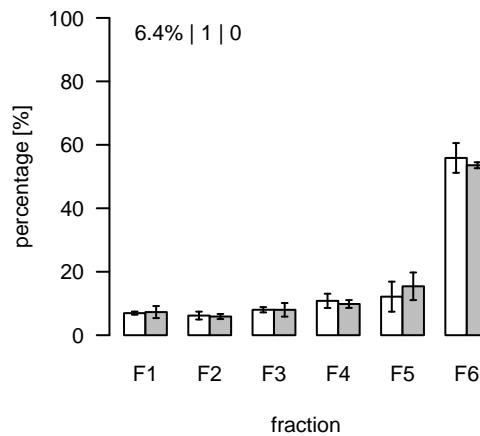

**L1389 (m/z=926.507982; rt=7.58547)**  
T/S Cluster: L-7.6-1

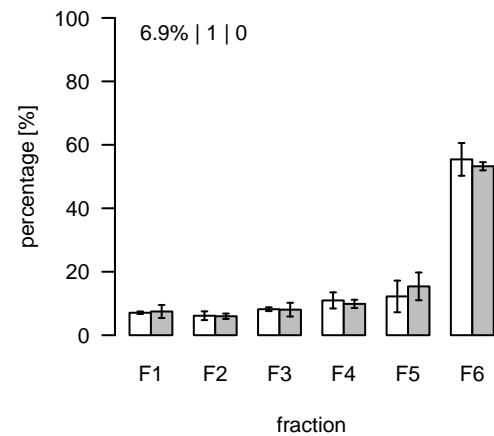

**L1384 (m/z=923.522057; rt=7.57347)**  
T/S Cluster: L-7.6-1

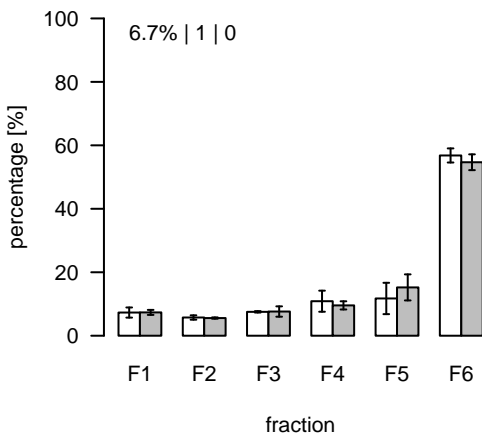

**L1394 (m/z=927.539542; rt=7.59798)**  
T/S Cluster: L-7.6-1

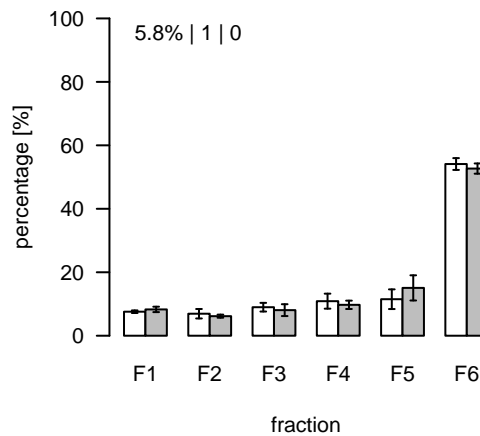

**L1382 (m/z=911.474589; rt=7.56848)**  
T/S Cluster: L-7.6-1

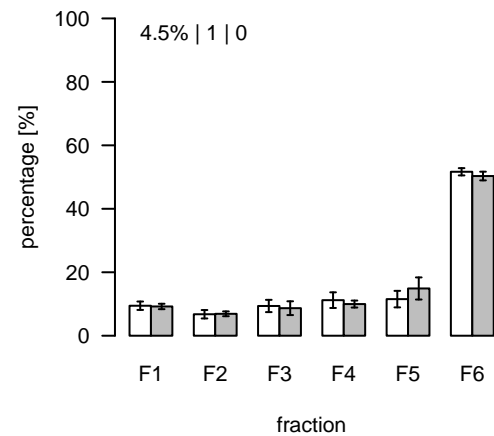

**L1383 (m/z=923.485697; rt=7.57336)**  
T/S Cluster: L-7.6-1

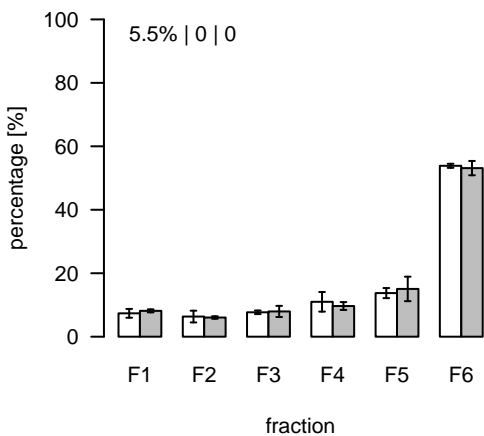

**L1386 (m/z=924.52711; rt=7.57369)**  
T/S Cluster: L-7.6-1

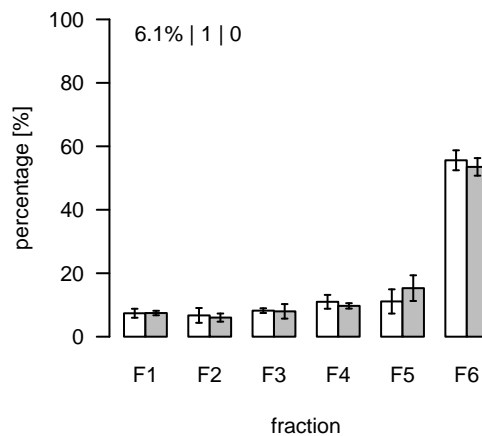

**L1385 (m/z=924.497716; rt=7.57355)**  
T/S Cluster: L-7.6-1

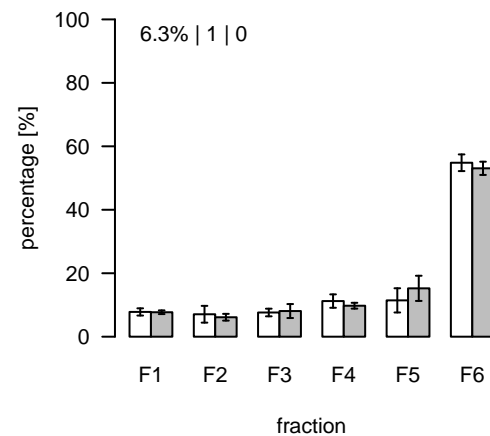

**L1387 (m/z=927.509668; rt=7.58444)**  
T/S Cluster: L-7.6-1

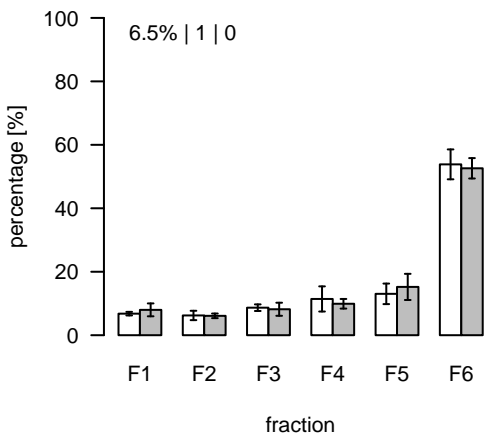

**L1395 (m/z=780.557237; rt=7.61583)**  
T/S Cluster: L-7.6-2

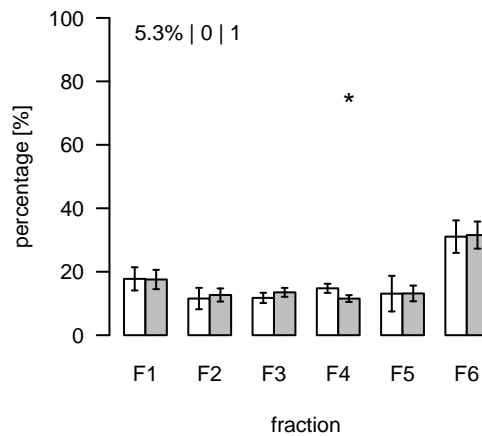

**L1396 (m/z=781.56125; rt=7.61712)**  
T/S Cluster: L-7.6-2

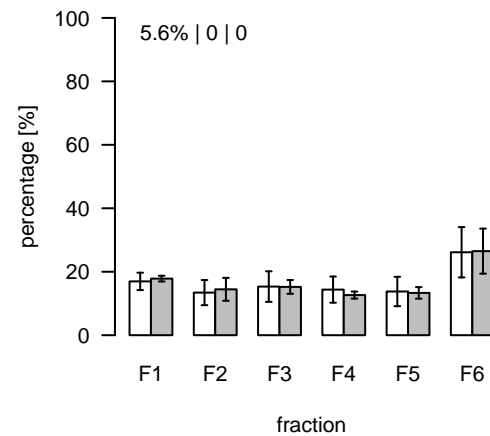

**L1397 (m/z=730.540982; rt=7.62448)**  
T/S Cluster: L-7.6-2

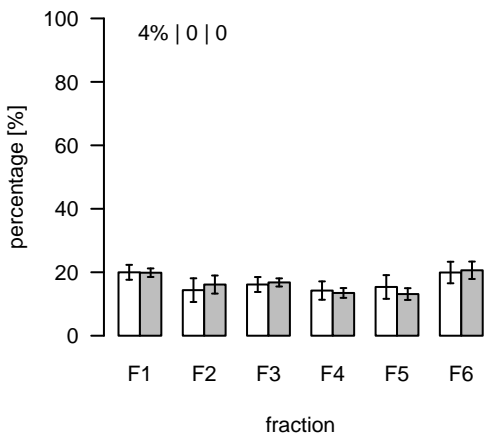

**L1401 (m/z=764.54776; rt=7.6285)**  
T/S Cluster: L-7.6-3

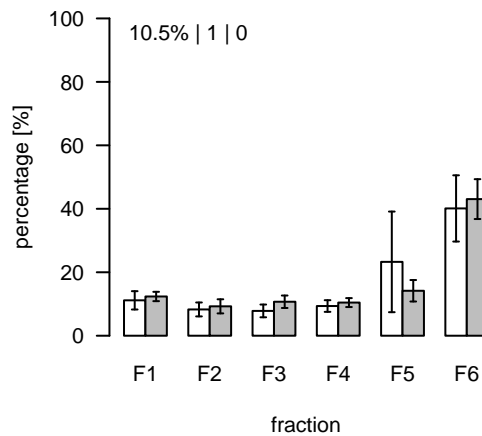

**L1400 (m/z=764.519979; rt=7.62849)**  
T/S Cluster: L-7.6-3

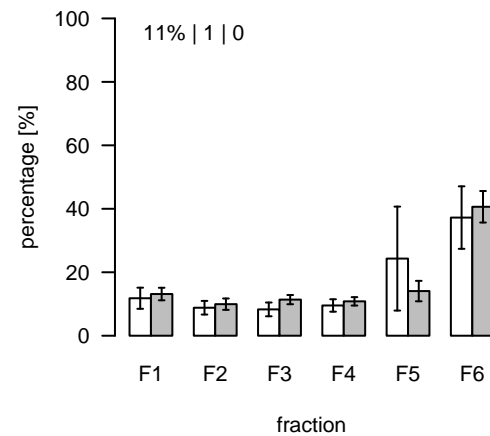

**L1399 (m/z=765.551613; rt=7.62804)**  
T/S Cluster: L-7.6-3

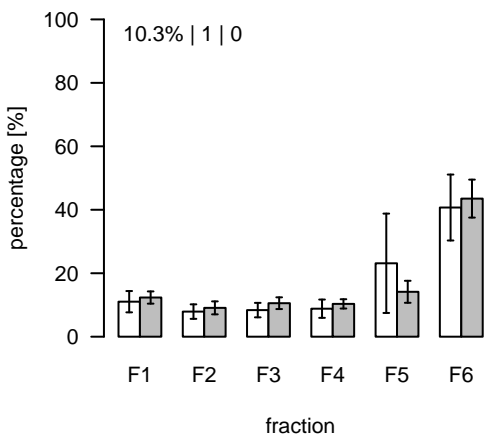

**L1398 (m/z=765.526724; rt=7.62768)**  
T/S Cluster: L-7.6-3

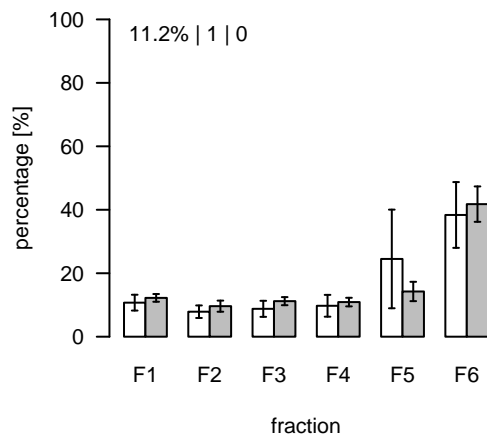

**L1402 (m/z=792.565983; rt=7.63018)**  
T/S Cluster: L-7.6-4

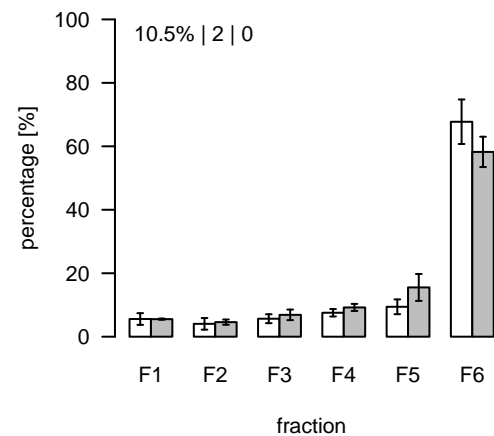

**L1403 (m/z=792.540315; rt=7.64521)**  
T/S Cluster: L-7.6-4

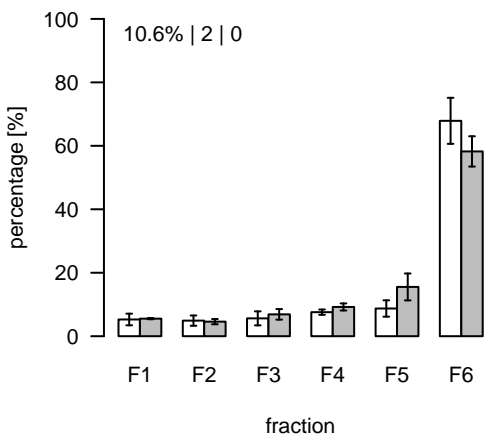

**L1409 (m/z=905.583088; rt=7.65526)**  
T/S Cluster: L-7.7-1

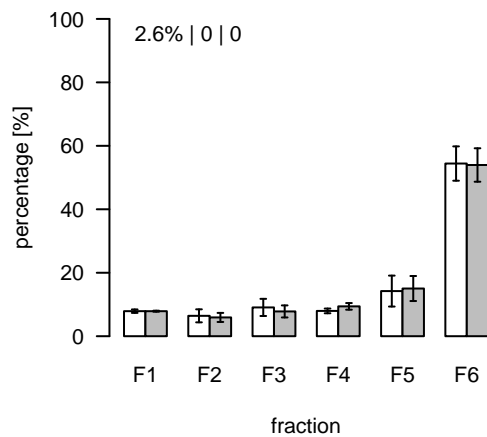

**L1411 (m/z=905.554105; rt=7.65544)**  
T/S Cluster: L-7.7-1

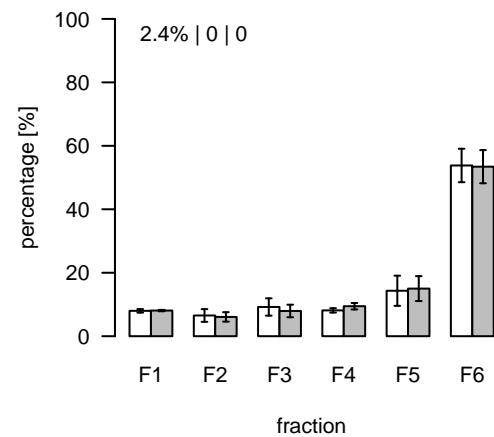

**L1407 (m/z=906.587279; rt=7.65516)**  
T/S Cluster: L-7.7-1

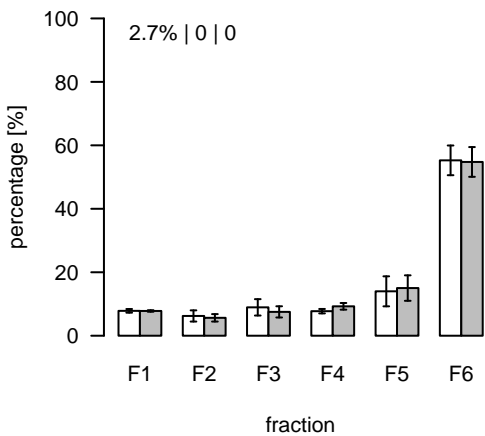

**L1413 (m/z=905.536727; rt=7.65685)**  
T/S Cluster: L-7.7-1

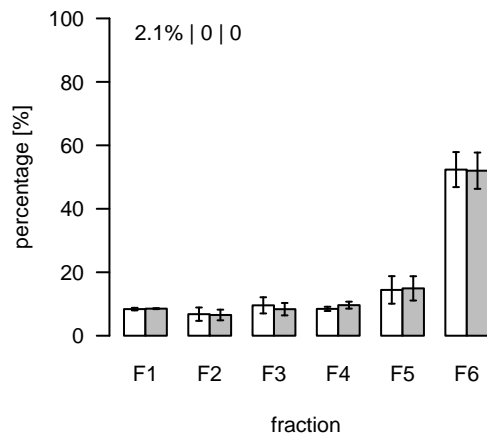

**L1410 (m/z=906.550328; rt=7.65543)**  
T/S Cluster: L-7.7-1

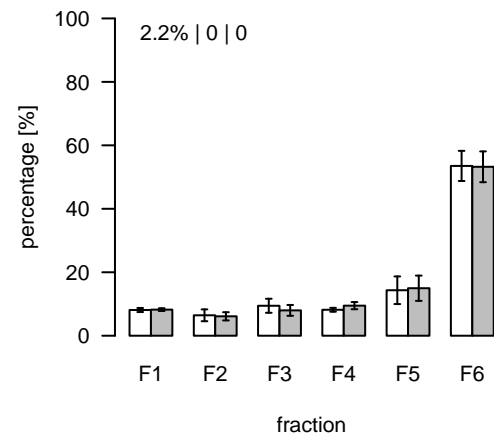

**L1404 (m/z=907.589541; rt=7.65495)**  
T/S Cluster: L-7.7-1

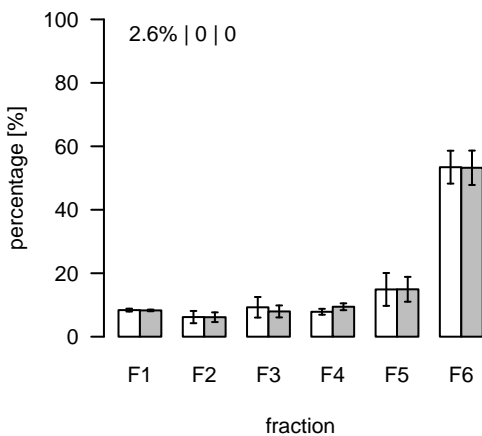

**L1406 (m/z=452.791083; rt=7.65511)**  
T/S Cluster: L-7.7-1

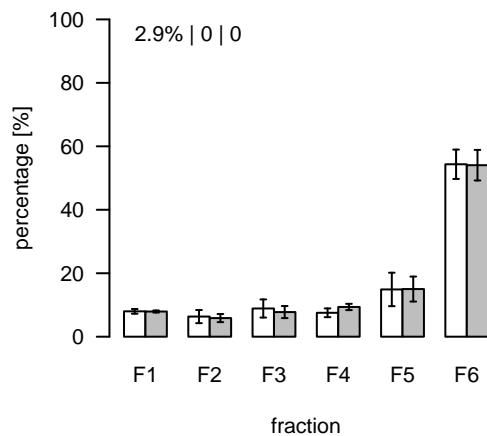

**L1408 (m/z=452.795849; rt=7.65519)**  
T/S Cluster: L-7.7-1

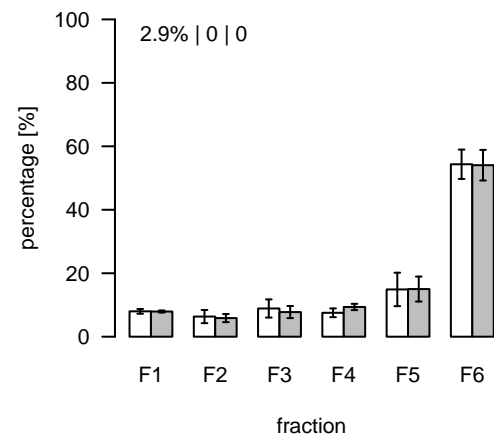

**L1412 (m/z=452.792708; rt=7.65613)**  
T/S Cluster: L-7.7-1

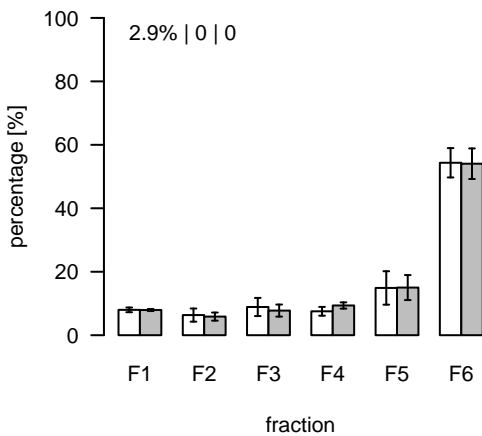

**L1405 (m/z=907.548946; rt=7.6551)**  
T/S Cluster: L-7.7-1

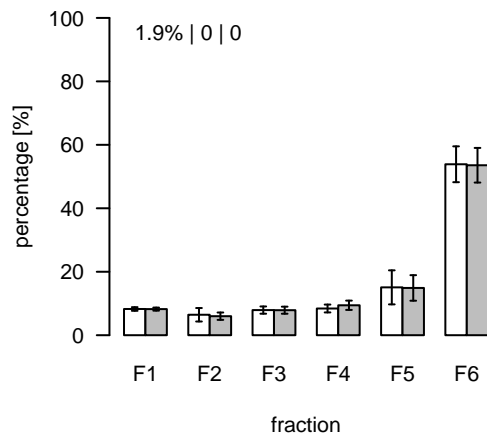

**L1414 (m/z=925.539658; rt=7.70764)**  
T/S Cluster: L-7.7-2

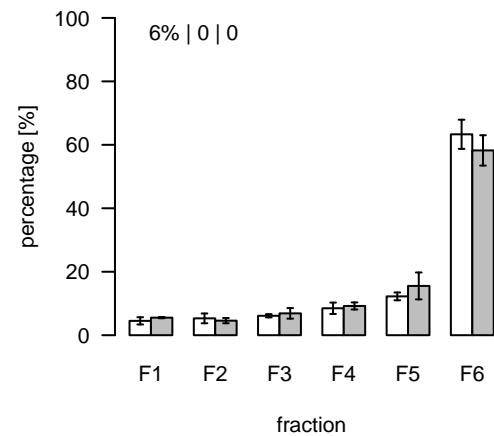

**L1415 (m/z=925.512652; rt=7.70774)**  
T/S Cluster: L-7.7-2

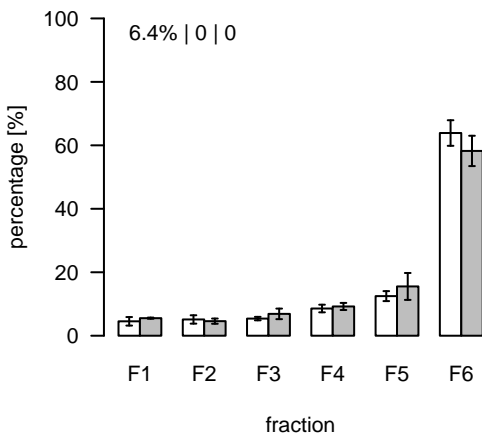

**L1418 (m/z=889.556965; rt=7.82273)**  
T/S Cluster: L-7.8-1

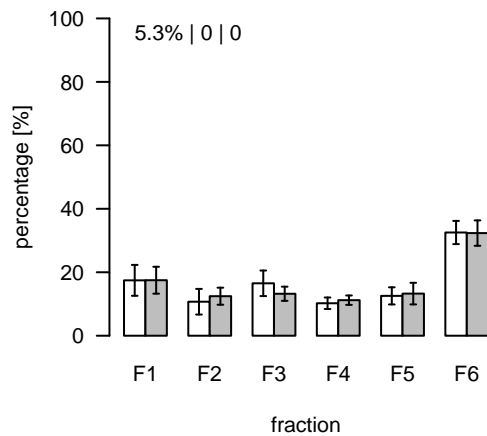

**L1417 (m/z=889.541442; rt=7.82154)**  
T/S Cluster: L-7.8-1

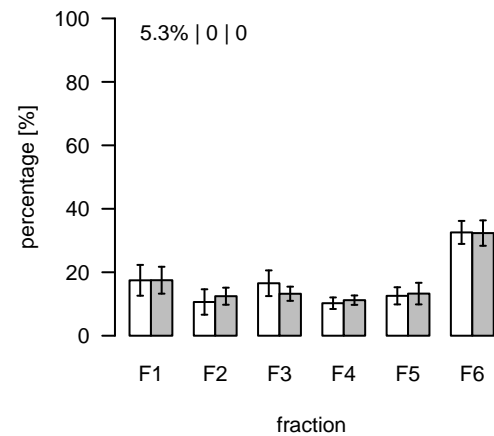

**L1419 (m/z=890.567468; rt=7.82308)**  
T/S Cluster: L-7.8-1

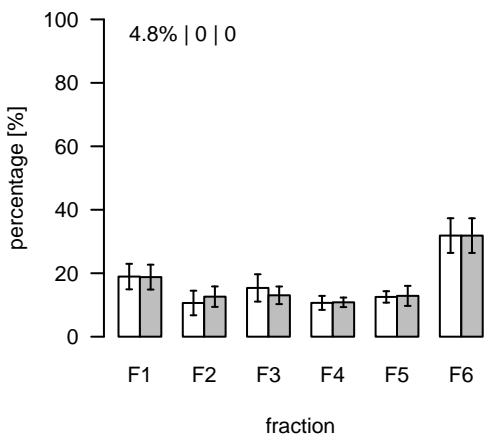

**L1416 (m/z=890.542543; rt=7.82128)**  
T/S Cluster: L-7.8-1

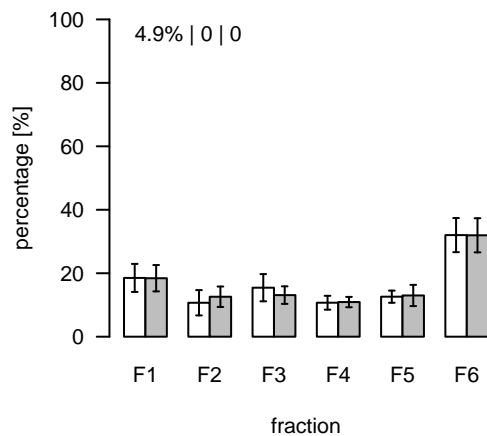

**L1420 (m/z=812.559586; rt=7.8668)**  
T/S Cluster: L-7.9-1

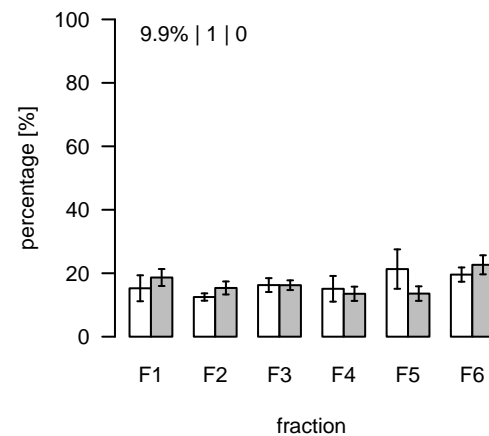

**L1422 (m/z=885.558396; rt=7.87876)**  
T/S Cluster: L-7.9-2

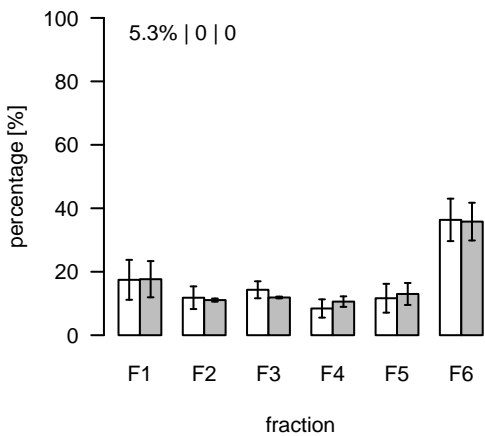

**L1423 (m/z=885.558865; rt=7.87877)**  
T/S Cluster: L-7.9-2

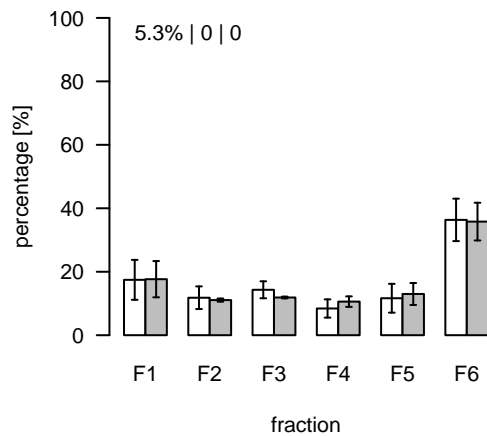

**L1421 (m/z=885.528757; rt=7.87705)**  
T/S Cluster: L-7.9-2

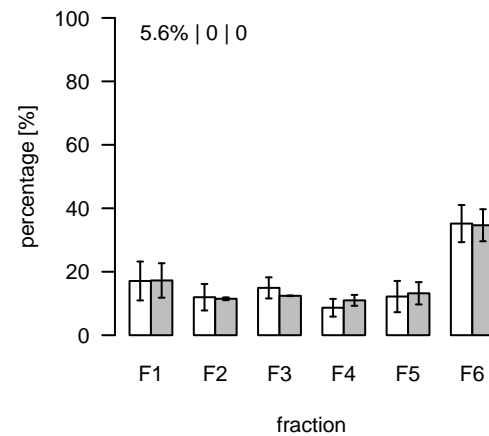

**L1424 (m/z=953.541784; rt=7.8852)**  
T/S Cluster: L-7.9-3

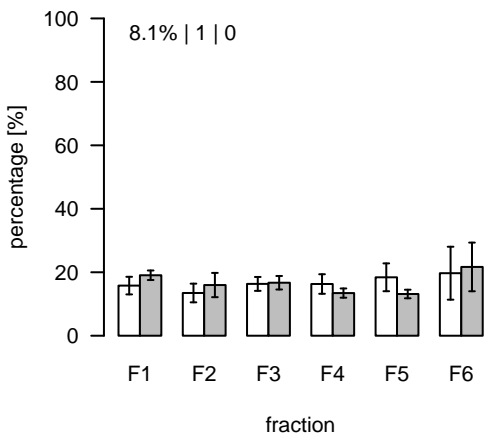

**L1430 (m/z=937.592552; rt=7.88914)**  
T/S Cluster: L-7.9-4

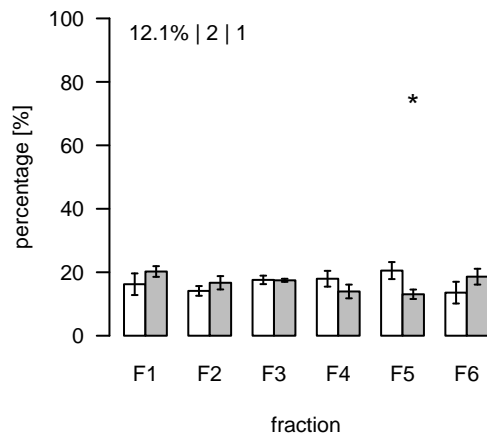

**L1429 (m/z=938.595778; rt=7.88877)**  
T/S Cluster: L-7.9-4

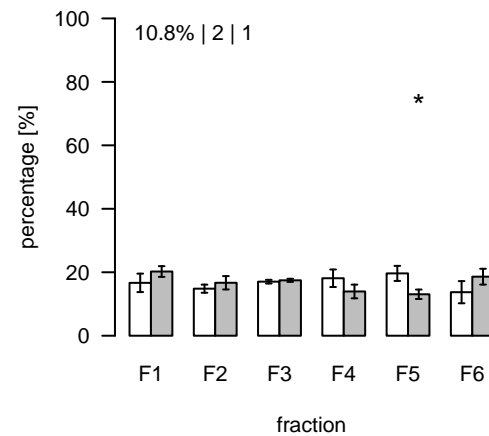

**L1427 (m/z=938.562162; rt=7.88639)**  
T/S Cluster: L-7.9-4

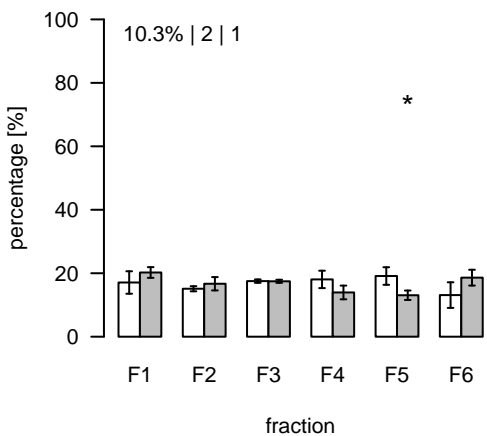

**L1425 (m/z=937.541131; rt=7.88552)**  
T/S Cluster: L-7.9-4

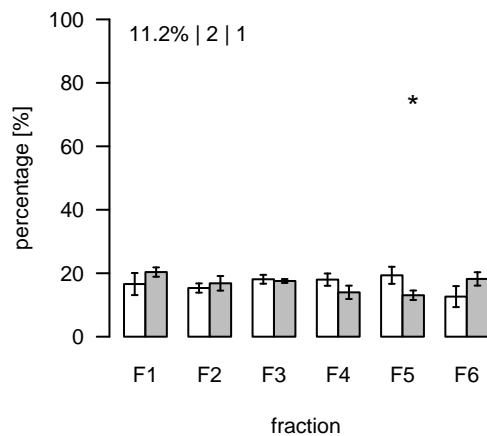

**L1428 (m/z=939.599988; rt=7.88726)**  
T/S Cluster: L-7.9-4

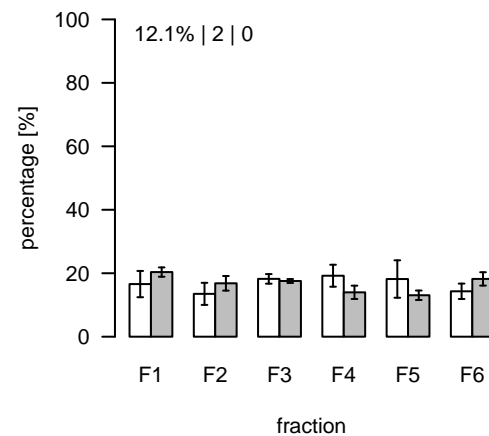

**L1426 (m/z=468.797405; rt=7.88604)**  
T/S Cluster: L-7.9-5

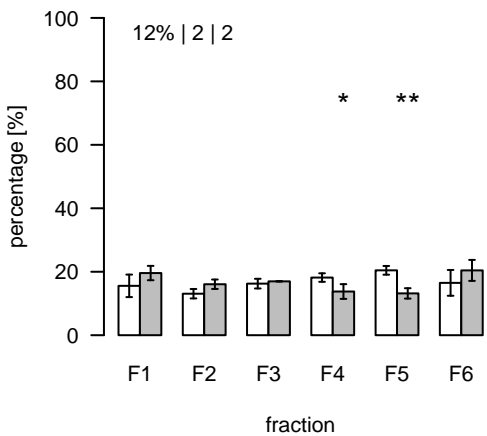

**L1431 (m/z=953.568179; rt=7.88953)**  
T/S Cluster: L-7.9-6

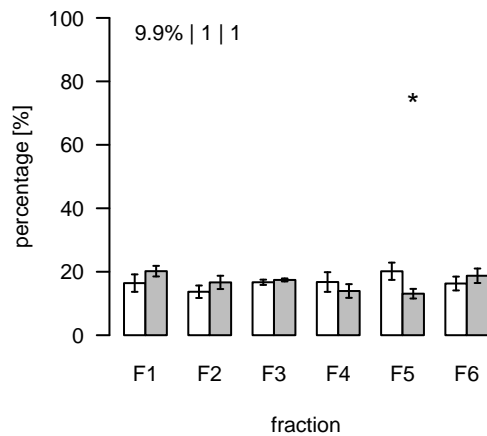

**L1432 (m/z=953.614044; rt=7.89403)**  
T/S Cluster: L-7.9-7

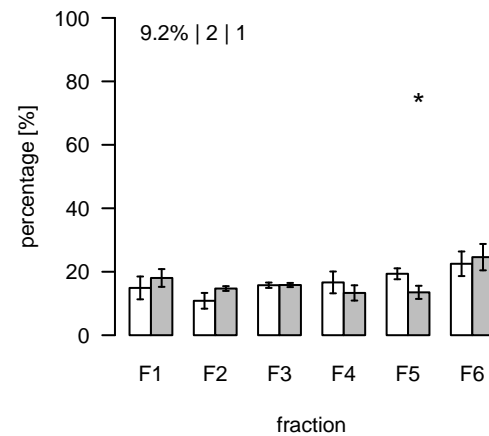

**L1434 (m/z=391.286679; rt=7.8975)**  
T/S Cluster: L-7.9-8

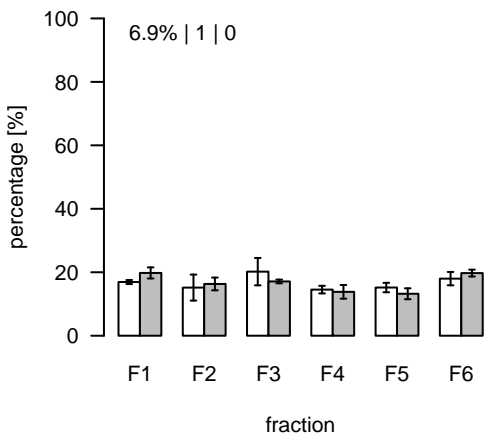

**L1433 (m/z=391.283354; rt=7.89661)**  
T/S Cluster: L-7.9-8

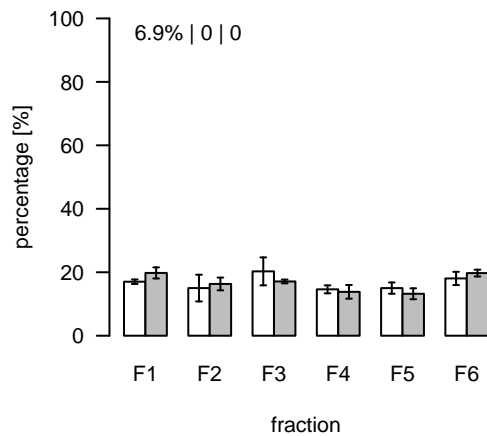

**L1447 (m/z=932.636174; rt=7.90407)**  
T/S Cluster: L-7.9-9

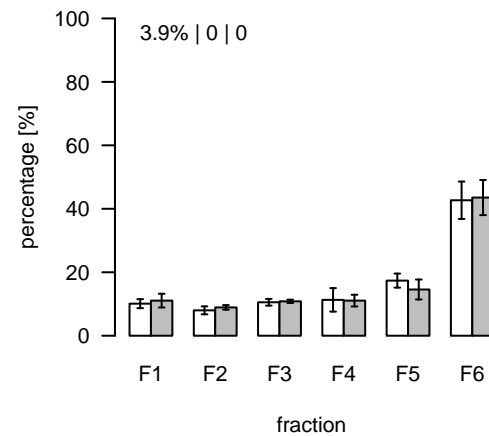

**L1446 (m/z=933.64108; rt=7.90392)**  
T/S Cluster: L-7.9-9

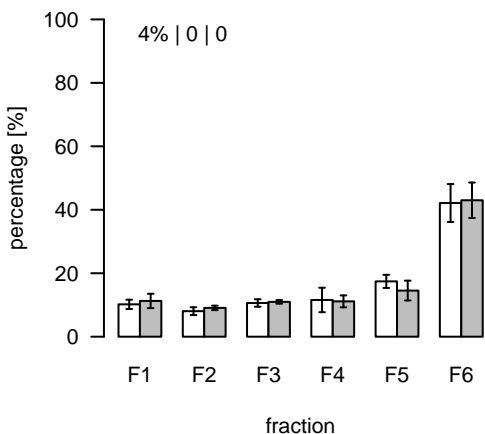

**L1439 (m/z=933.594705; rt=7.90185)**  
T/S Cluster: L-7.9-9

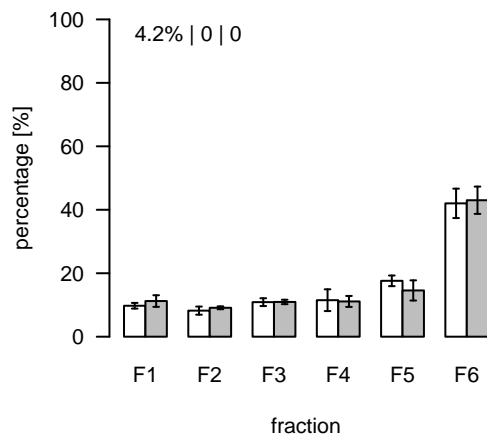

**L1444 (m/z=934.644324; rt=7.90383)**  
T/S Cluster: L-7.9-9

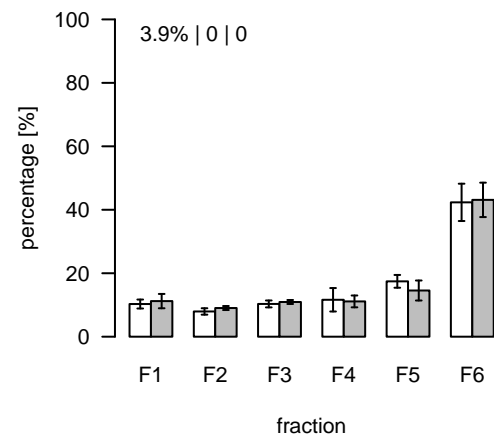

**L1440 (m/z=934.608819; rt=7.90233)**  
T/S Cluster: L-7.9-9

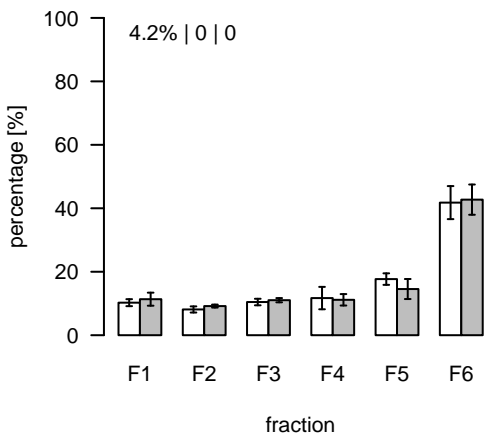

**L1445 (m/z=466.320014; rt=7.90391)**  
T/S Cluster: L-7.9-9

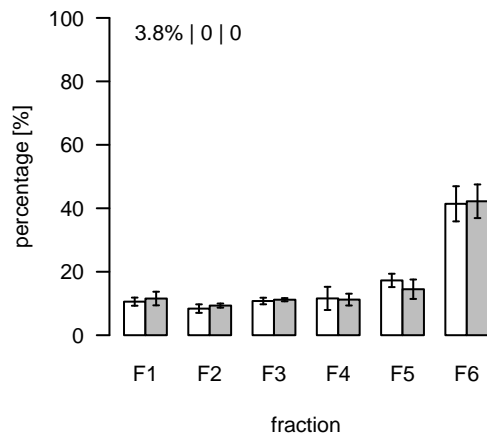

**L1462 (m/z=768.567682; rt=7.9182)**  
T/S Cluster: L-7.9-9

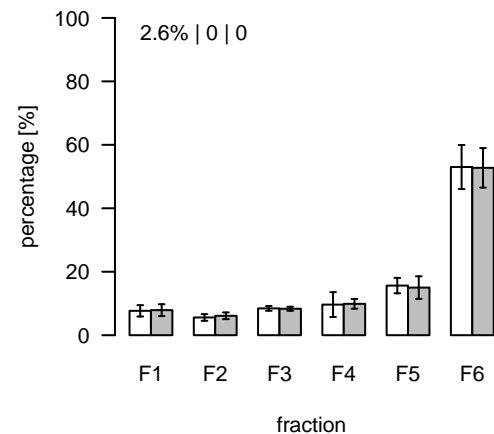

**L1441 (m/z=466.817917; rt=7.90291)**  
T/S Cluster: L-7.9-9

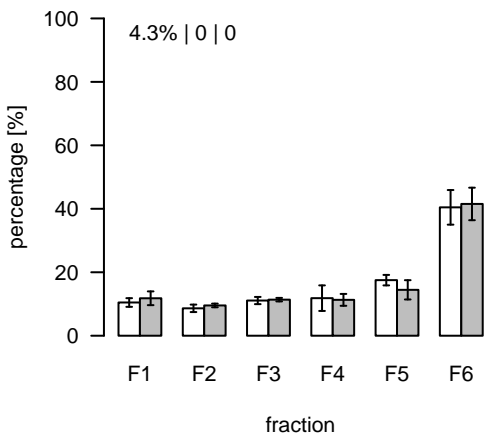

**L1451 (m/z=466.826657; rt=7.9051)**  
T/S Cluster: L-7.9-9

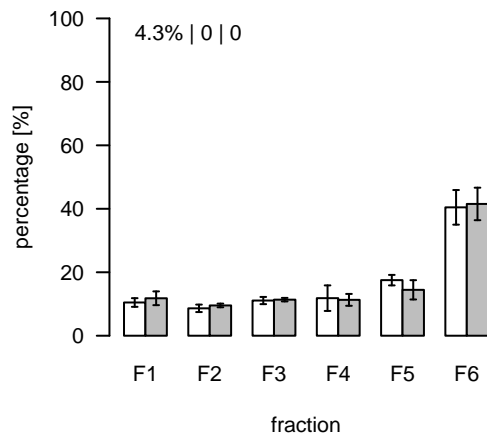

**L1464 (m/z=769.571439; rt=7.91871)**  
T/S Cluster: L-7.9-9

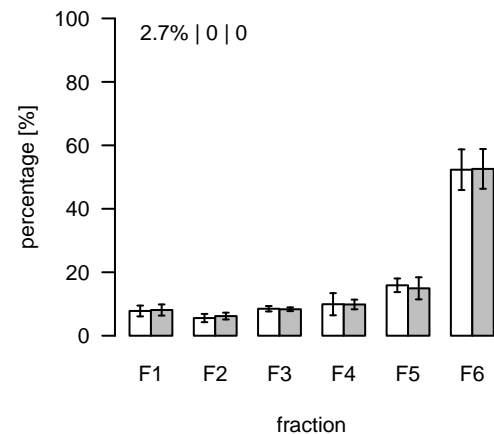

**L1448 (m/z=310.884288; rt=7.90426)**  
T/S Cluster: L-7.9-9

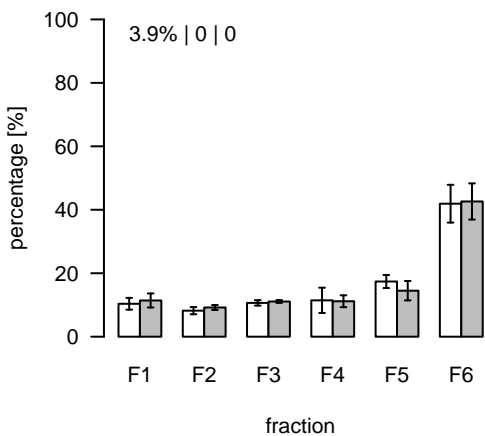

**L1443 (m/z=935.647551; rt=7.90353)**  
T/S Cluster: L-7.9-9

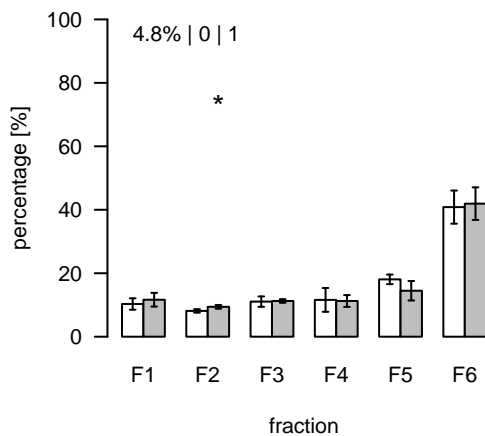

**L1437 (m/z=466.300225; rt=7.89864)**  
T/S Cluster: L-7.9-9

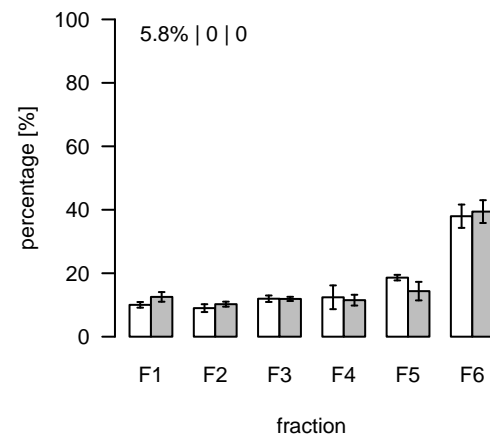

**L1435 (m/z=310.877356; rt=7.89853)**  
T/S Cluster: L-7.9-9

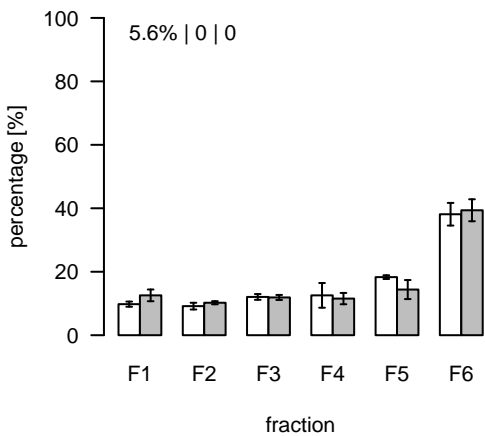

**L1449 (m/z=311.218901; rt=7.90432)**  
T/S Cluster: L-7.9-9

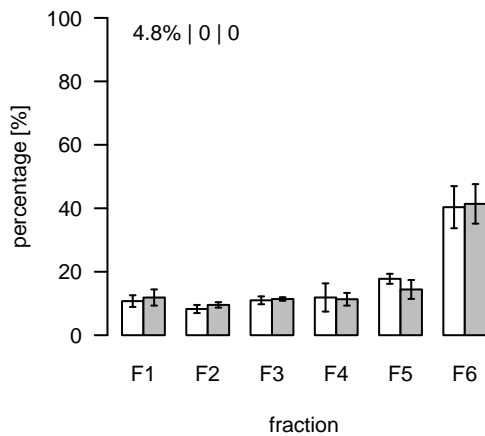

**L1461 (m/z=769.53583; rt=7.91783)**  
T/S Cluster: L-7.9-9

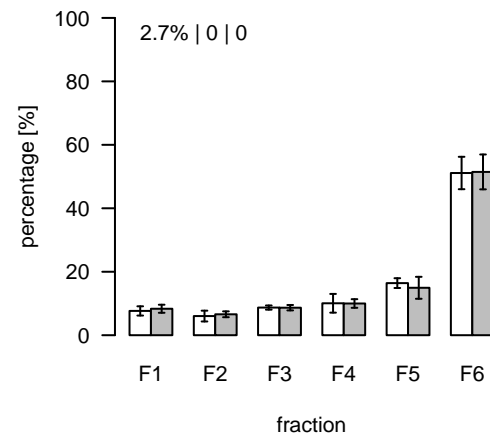

**L1453 (m/z=591.503149; rt=7.90711)**  
T/S Cluster: L-7.9-9

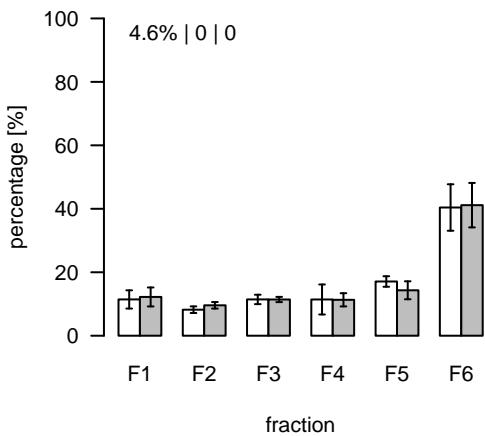

**L1452 (m/z=591.490911; rt=7.90631)**  
T/S Cluster: L-7.9-9

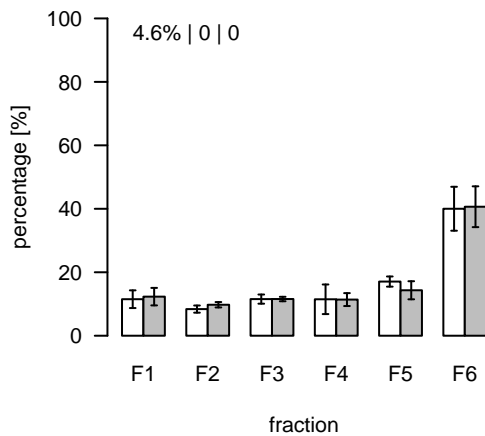

**L1442 (m/z=467.322202; rt=7.90338)**  
T/S Cluster: L-7.9-9

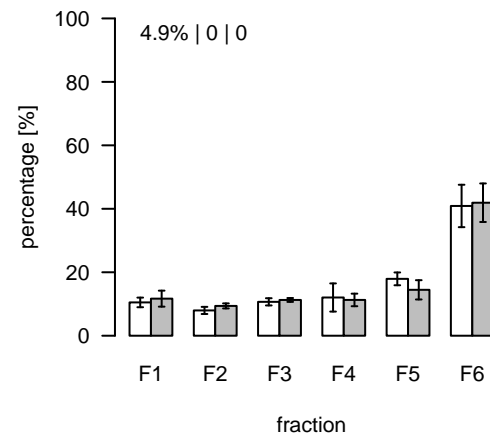



**L1450 (m/z=467.327978; rt=7.90476)**  
T/S Cluster: L-7.9-9

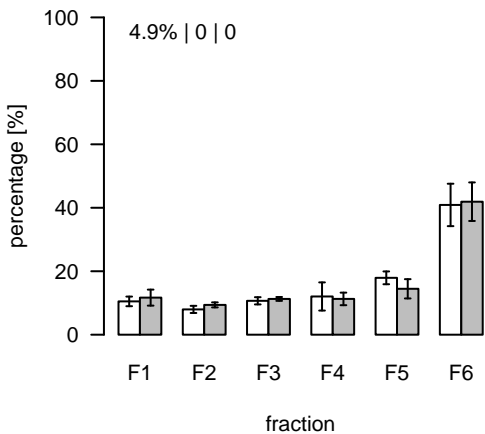

**L1460 (m/z=770.574336; rt=7.91782)**  
T/S Cluster: L-7.9-9

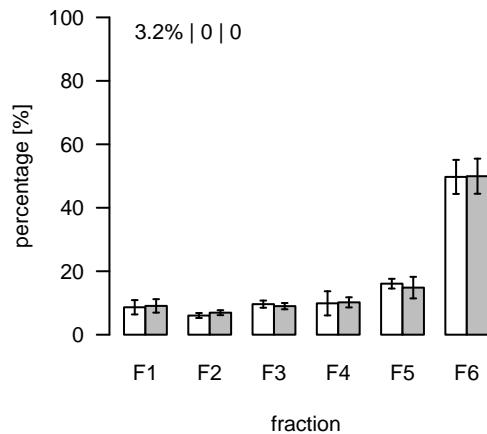

**L1458 (m/z=768.514125; rt=7.91597)**  
T/S Cluster: L-7.9-9

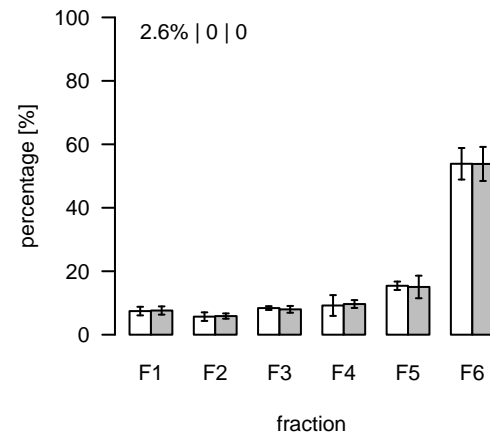

**L1463 (m/z=384.283293; rt=7.91847)**  
T/S Cluster: L-7.9-9

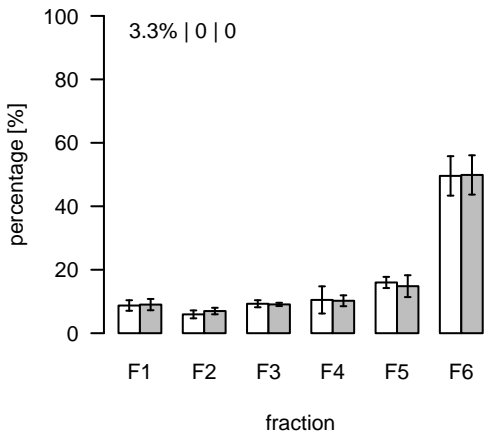

**L1465 (m/z=384.286823; rt=7.91898)**  
T/S Cluster: L-7.9-9

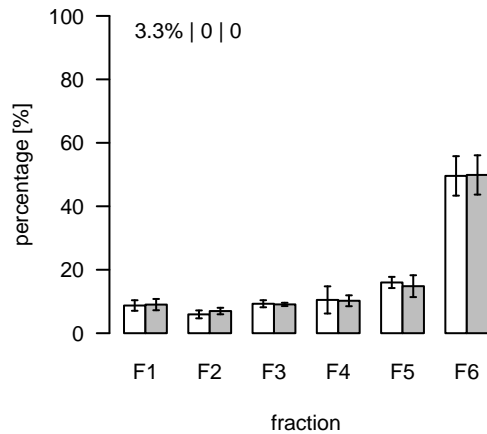

**L1436 (m/z=311.212947; rt=7.8986)**  
T/S Cluster: L-7.9-9

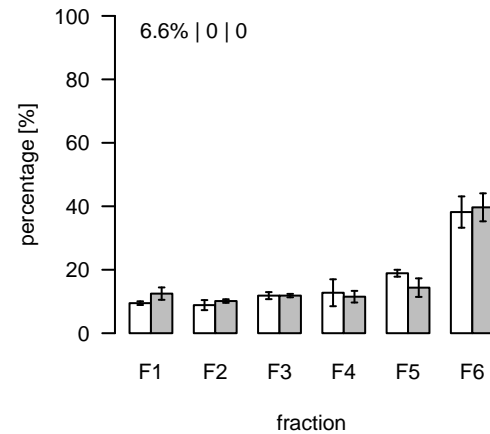

**L1438 (m/z=935.587552; rt=7.89946)**  
T/S Cluster: L-7.9-9

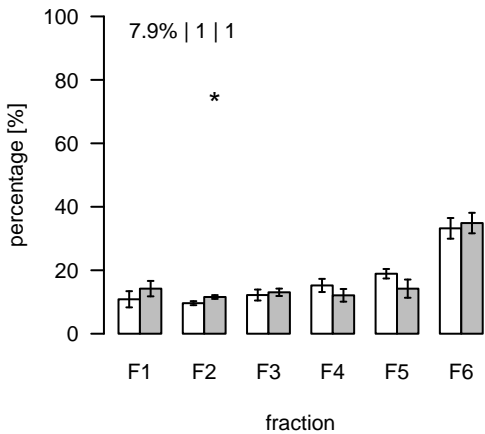

**L1459 (m/z=770.542739; rt=7.91704)**  
T/S Cluster: L-7.9-9

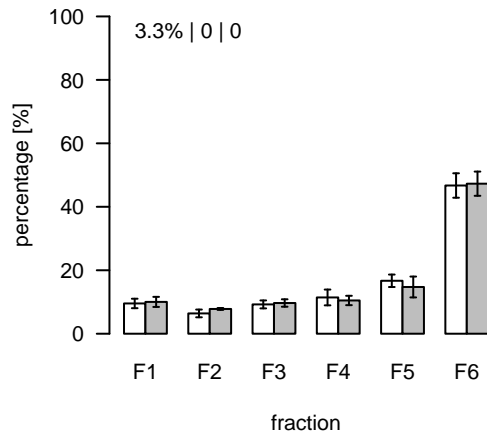

**L1456 (m/z=773.523228; rt=7.90914)**  
T/S Cluster: L-7.9-10

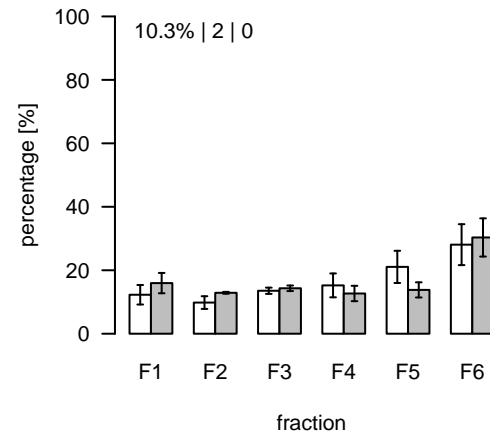

**L1454 (m/z=774.527507; rt=7.90734)**  
T/S Cluster: L-7.9-10

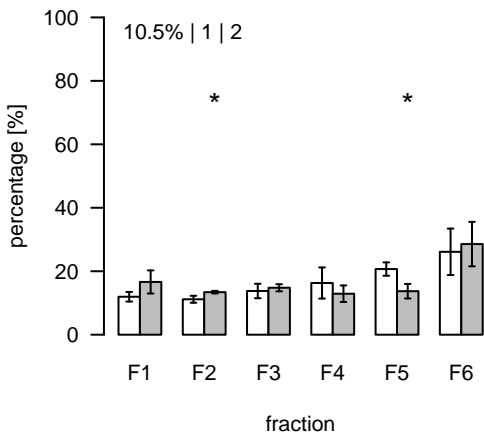

**L1455 (m/z=774.550754; rt=7.90738)**  
T/S Cluster: L-7.9-10

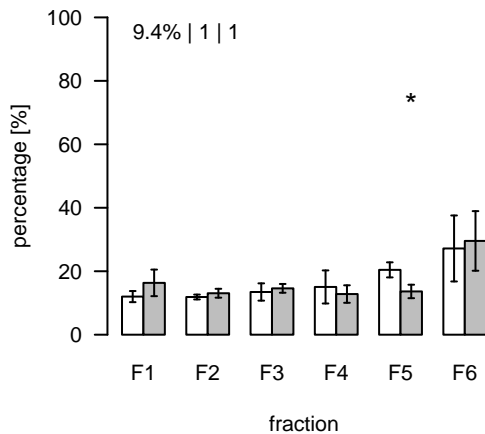

**L1457 (m/z=388.343832; rt=7.91226)**  
T/S Cluster: L-7.9-11

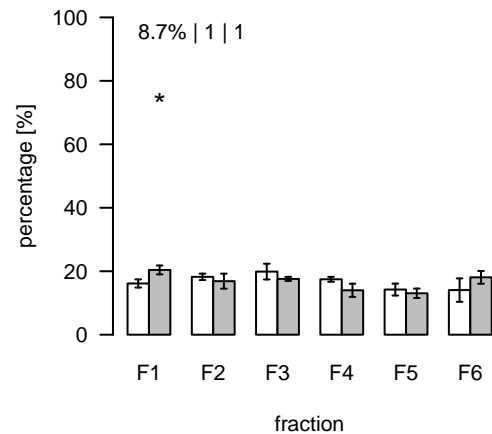

**L1466 (m/z=738.537995; rt=7.9195)**  
T/S Cluster: L-7.9-12

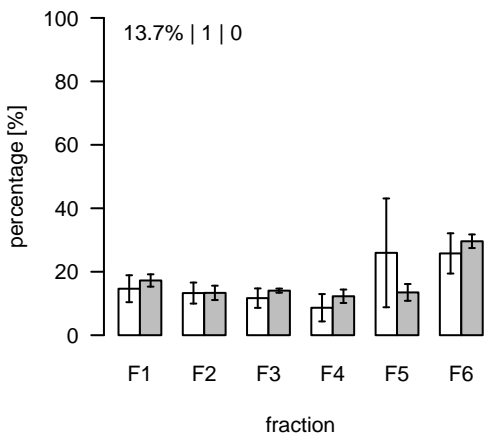

**L1483 (m/z=716.571836; rt=7.93894)**  
T/S Cluster: L-7.9-13

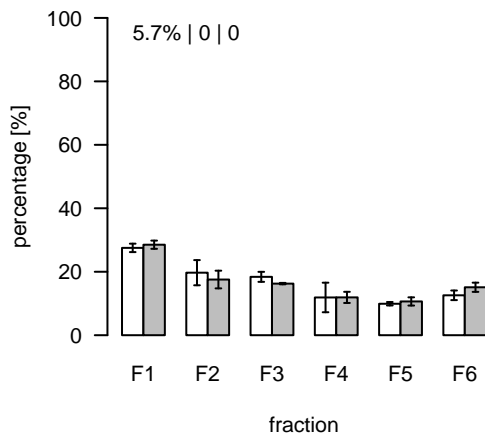

**L1467 (m/z=716.541497; rt=7.93134)**  
T/S Cluster: L-7.9-13

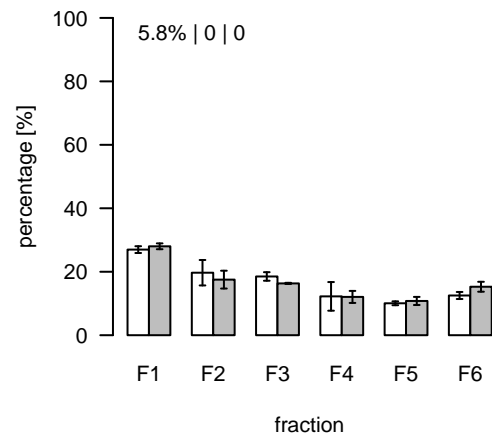

**L1473 (m/z=717.576433; rt=7.93871)**  
T/S Cluster: L-7.9-13

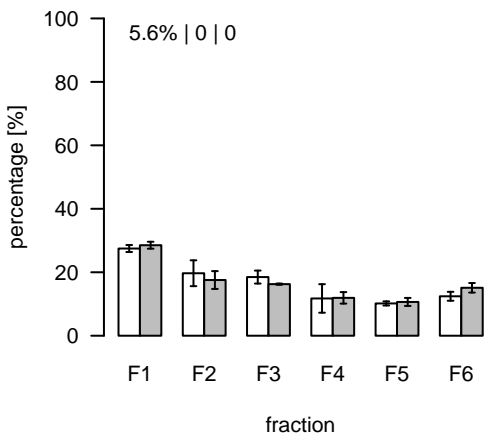

**L1474 (m/z=717.55087; rt=7.93873)**  
T/S Cluster: L-7.9-13

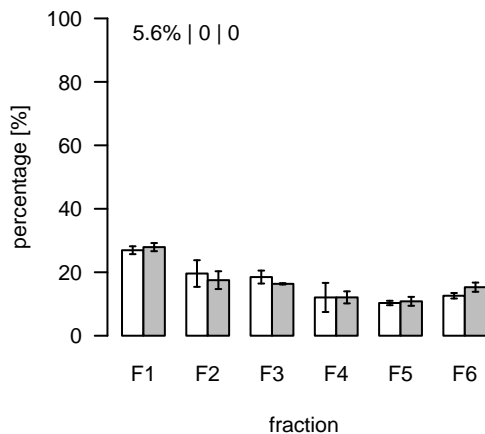

**L1468 (m/z=716.525973; rt=7.93437)**  
T/S Cluster: L-7.9-13

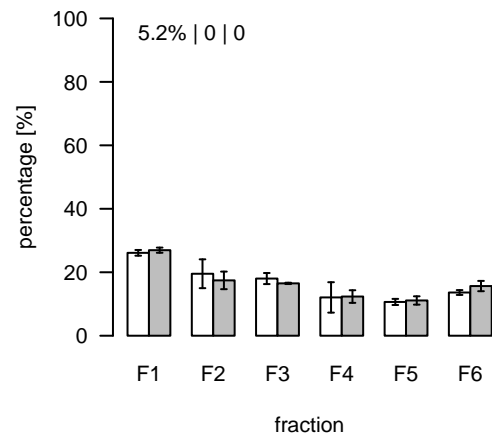

**L1492 (m/z=358.288817; rt=7.93915)**  
T/S Cluster: L-7.9-13

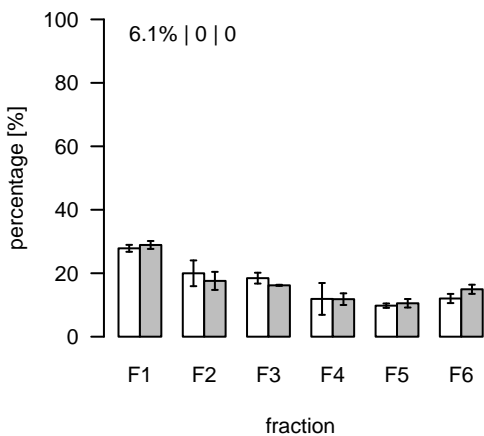

**L1500 (m/z=358.284075; rt=7.93941)**  
T/S Cluster: L-7.9-13

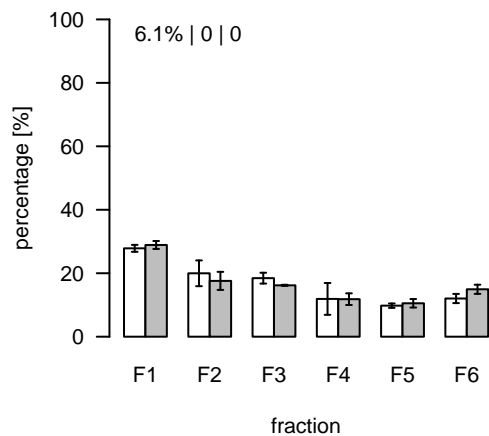

**L1479 (m/z=718.580796; rt=7.93884)**  
T/S Cluster: L-7.9-13

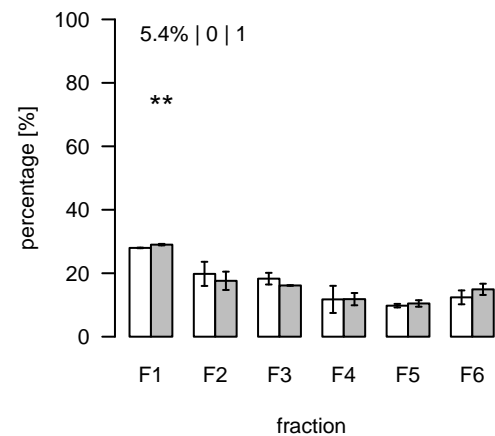

**L1478 (m/z=718.562552; rt=7.93883)**  
T/S Cluster: L-7.9-13

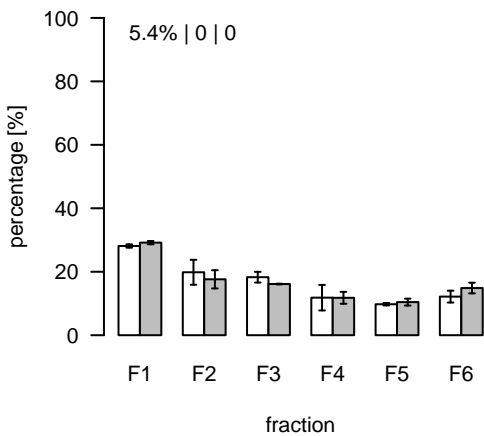

**L1485 (m/z=358.792133; rt=7.93903)**  
T/S Cluster: L-7.9-13

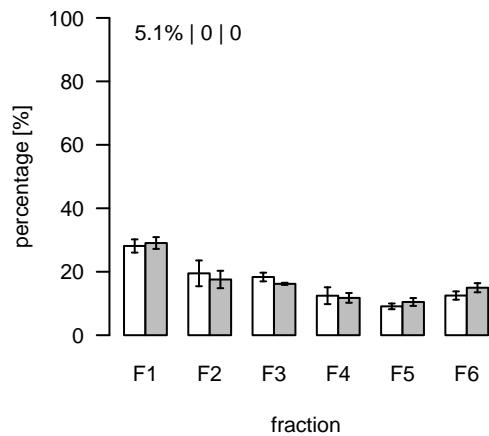

**L1499 (m/z=358.787461; rt=7.93931)**  
T/S Cluster: L-7.9-13

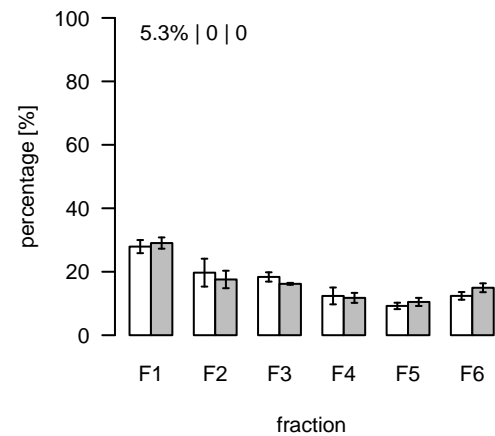

**L1497 (m/z=238.861499; rt=7.93927)**  
T/S Cluster: L-7.9-13

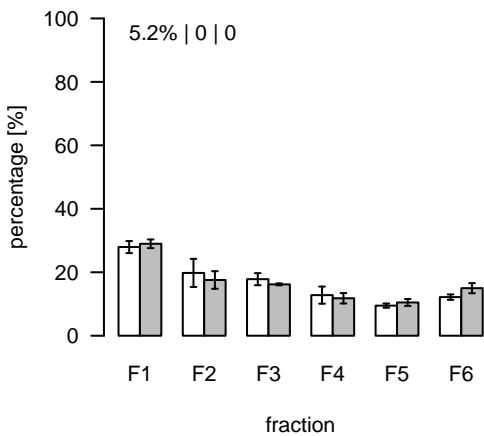

**L1502 (m/z=238.859561; rt=7.93954)**  
T/S Cluster: L-7.9-13

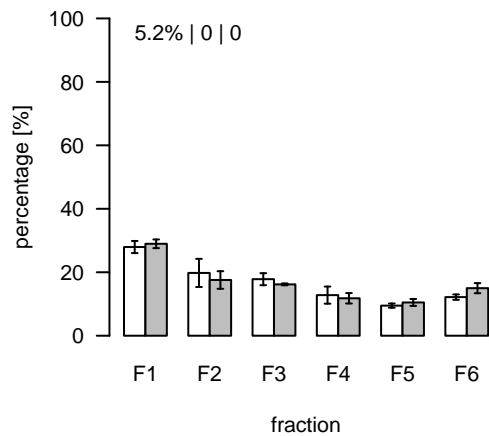

**L1508 (m/z=554.517178; rt=7.94051)**  
T/S Cluster: L-7.9-13

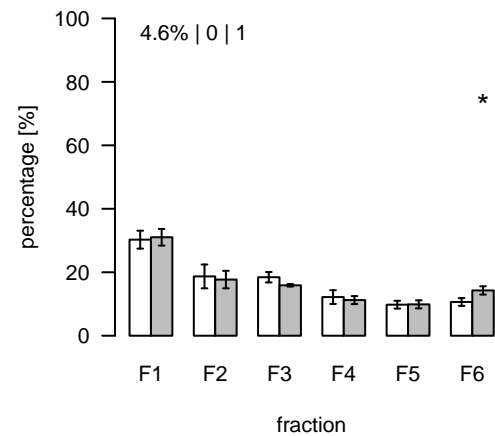

**L1486 (m/z=756.556924; rt=7.93904)**  
T/S Cluster: L-7.9-14

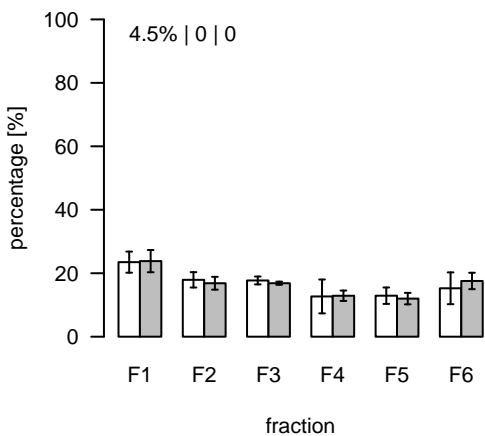

**L1482 (m/z=757.560639; rt=7.93892)**  
T/S Cluster: L-7.9-14

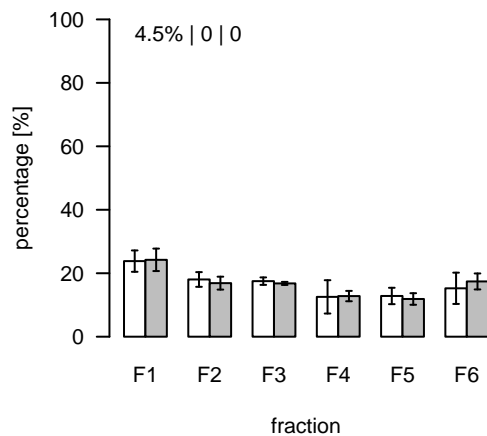

**L1498 (m/z=378.279673; rt=7.9393)**  
T/S Cluster: L-7.9-14

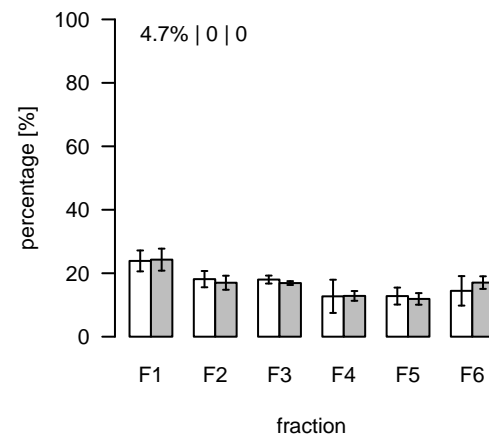

**L1475 (m/z=758.567863; rt=7.93877)**  
T/S Cluster: L-7.9-14

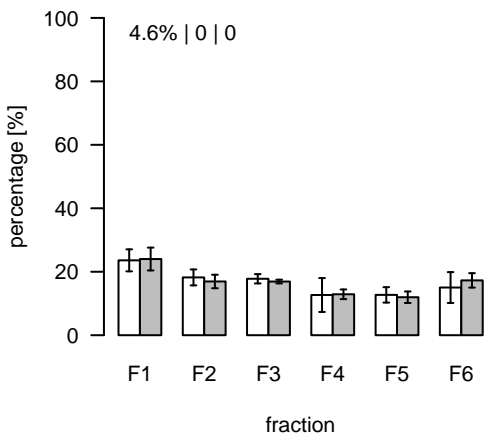

**L1490 (m/z=378.781595; rt=7.93914)**  
T/S Cluster: L-7.9-14

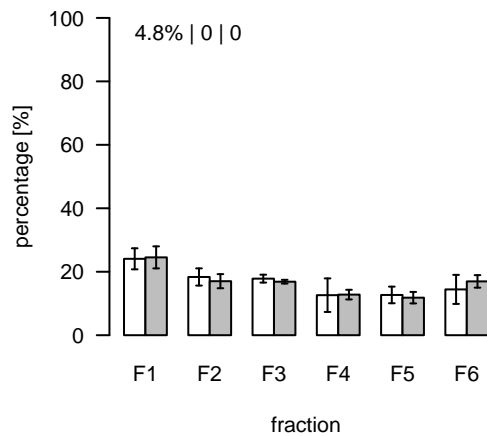

**L1489 (m/z=758.533162; rt=7.93908)**  
T/S Cluster: L-7.9-14

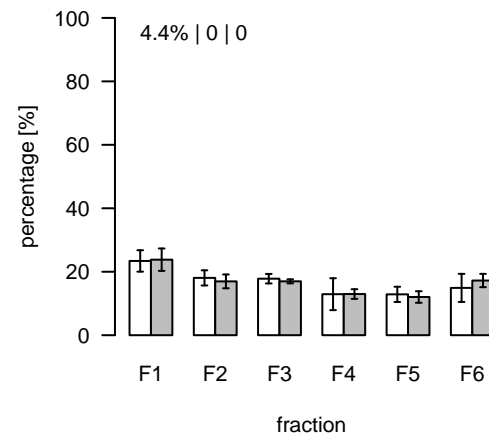

**L1494 (m/z=252.189377; rt=7.93917)**  
T/S Cluster: L-7.9-14

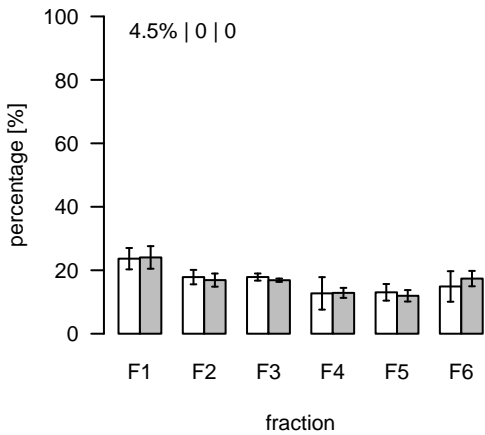

**L1470 (m/z=758.606611; rt=7.93839)**  
T/S Cluster: L-7.9-14

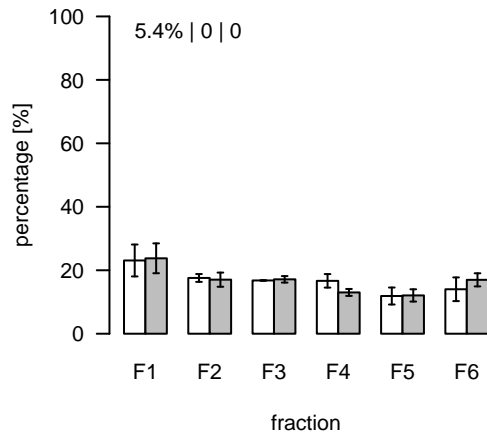

**L1477 (m/z=759.568946; rt=7.9388)**  
T/S Cluster: L-7.9-14

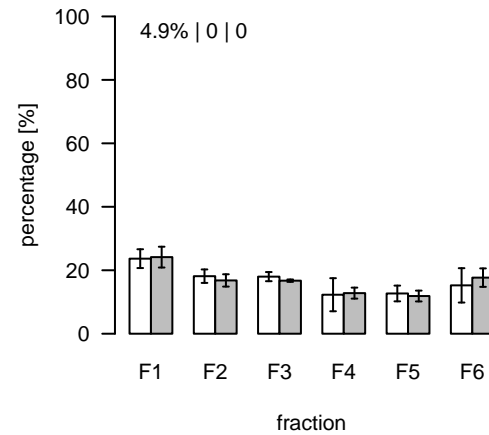

**L1487 (m/z=252.523965; rt=7.93904)**  
T/S Cluster: L-7.9-14

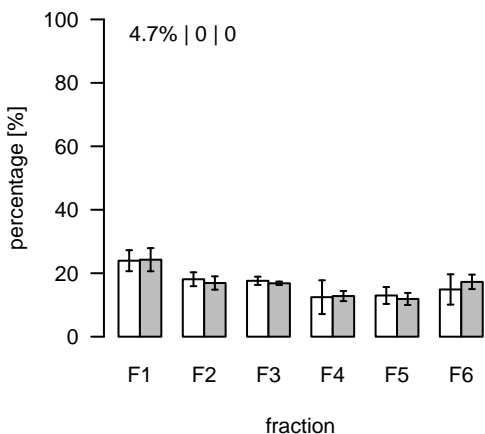

**L1480 (m/z=379.28644; rt=7.93884)**  
T/S Cluster: L-7.9-14

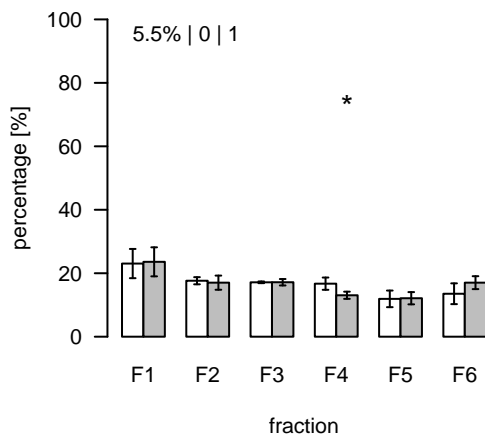

**L1491 (m/z=379.280692; rt=7.93915)**  
T/S Cluster: L-7.9-14

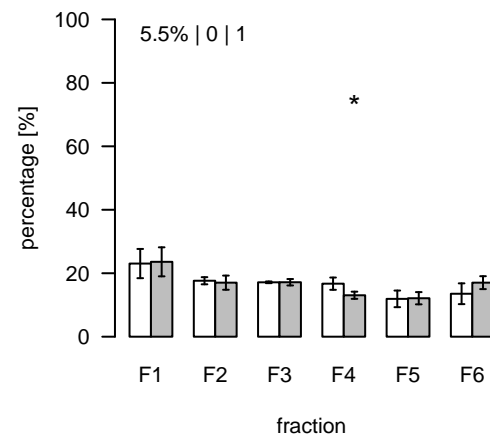

**L1493 (m/z=759.538736; rt=7.93916)**  
T/S Cluster: L-7.9-14

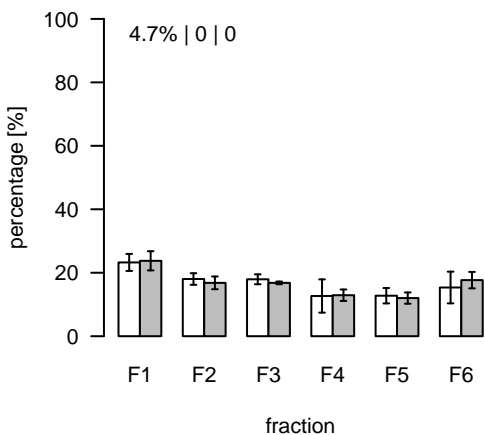

**L1509 (m/z=378.264178; rt=7.94069)**  
T/S Cluster: L-7.9-14

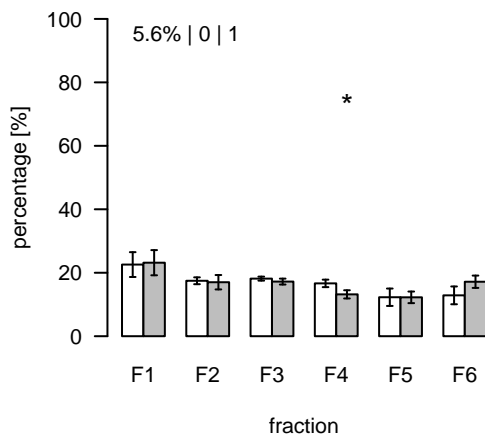

**L1503 (m/z=252.519585; rt=7.93977)**  
T/S Cluster: L-7.9-14

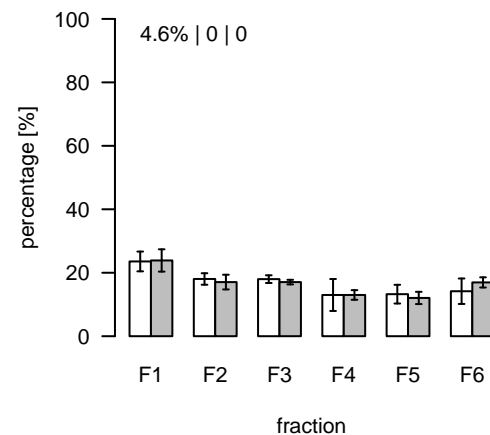

**L1506 (m/z=252.182656; rt=7.94018)**  
T/S Cluster: L-7.9-14

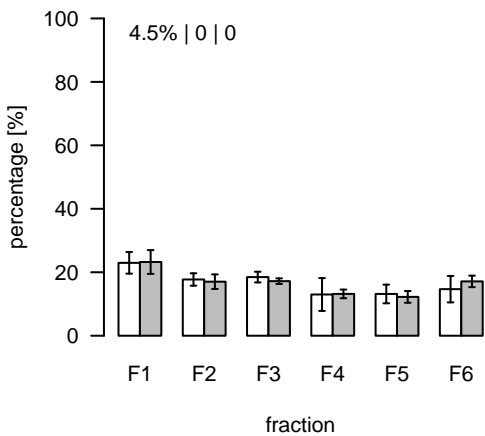

**L1504 (m/z=378.767913; rt=7.93996)**  
T/S Cluster: L-7.9-14

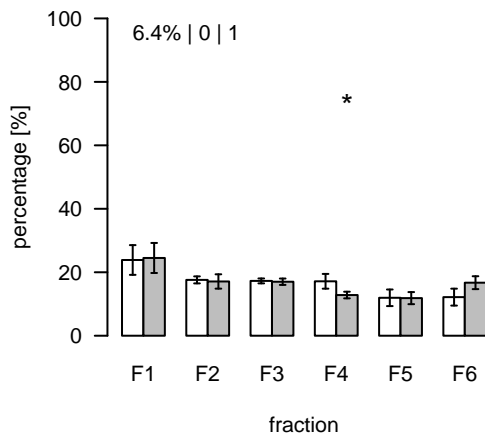

**L1501 (m/z=189.139591; rt=7.93951)**  
T/S Cluster: L-7.9-14

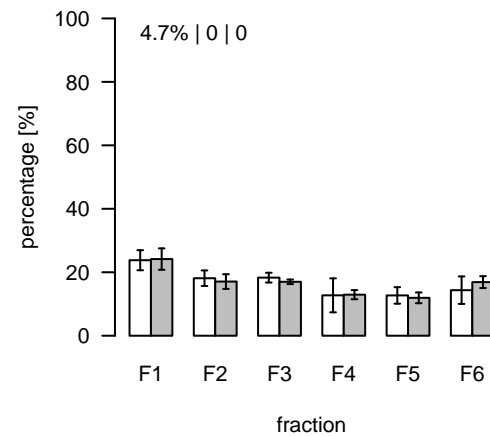

**L1472 (m/z=252.858794; rt=7.93866)**  
T/S Cluster: L-7.9-14

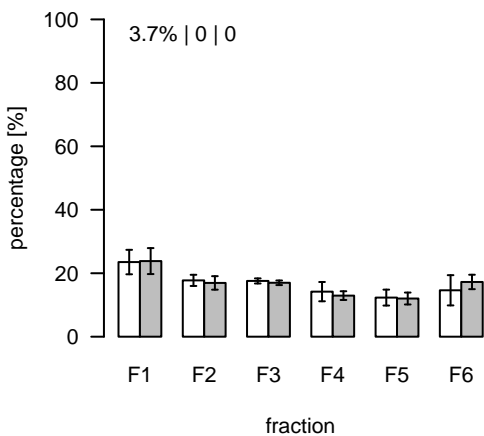

**L1471 (m/z=189.142879; rt=7.93847)**  
T/S Cluster: L-7.9-14

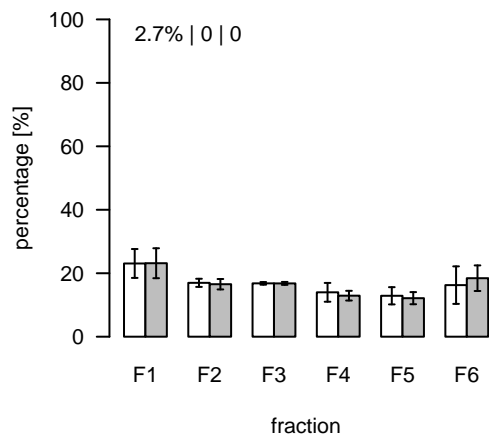

**L1496 (m/z=252.855676; rt=7.93923)**  
T/S Cluster: L-7.9-14

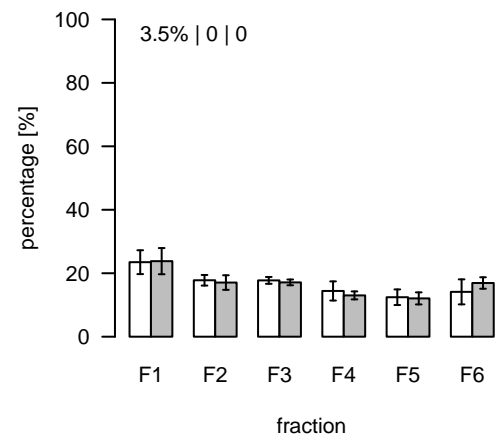

**L1495 (m/z=151.313088; rt=7.93923)**  
T/S Cluster: L-7.9-14

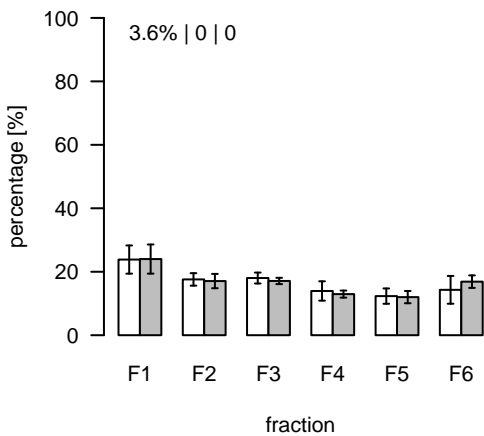

**L1484 (m/z=760.571578; rt=7.93895)**  
T/S Cluster: L-7.9-14

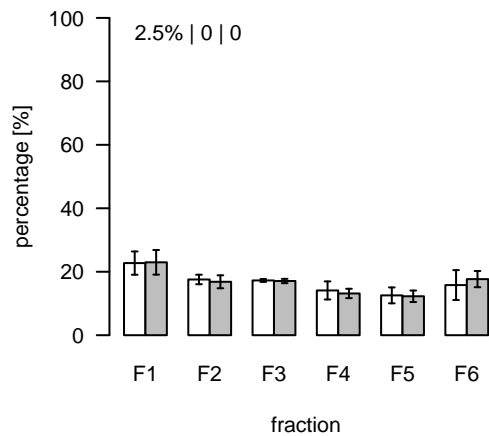

**L1481 (m/z=379.784437; rt=7.93891)**  
T/S Cluster: L-7.9-14

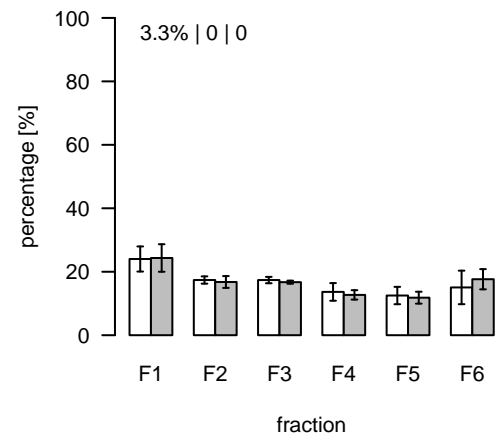

**L1476 (m/z=379.788124; rt=7.93878)**  
T/S Cluster: L-7.9-14

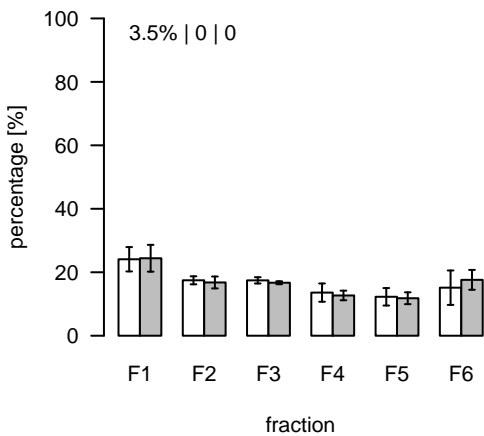

**L1488 (m/z=189.390513; rt=7.93905)**  
T/S Cluster: L-7.9-14

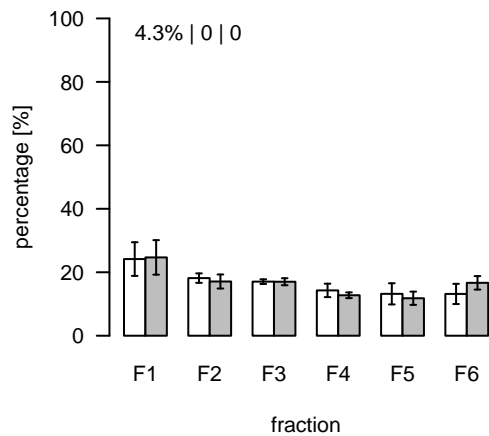

**L1469 (m/z=189.393535; rt=7.93775)**  
T/S Cluster: L-7.9-14

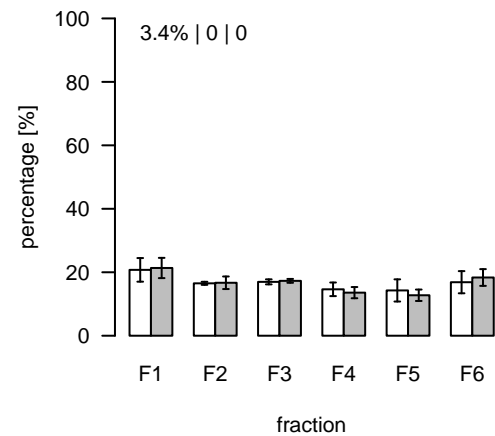

**L1507 (m/z=151.311605; rt=7.94023)**  
T/S Cluster: L-7.9-14

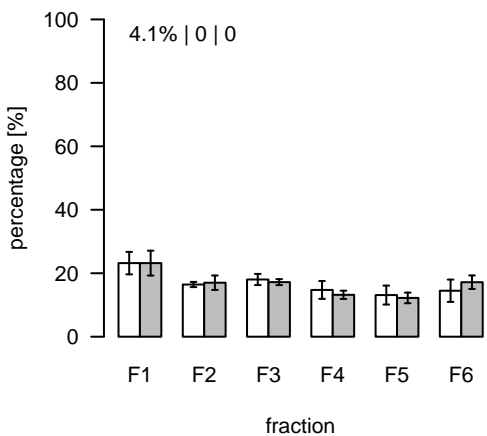

**L1505 (m/z=184.073559; rt=7.94015)**  
T/S Cluster: L-7.9-14

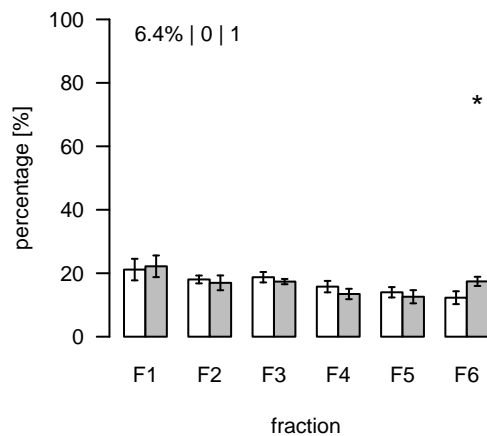

**L1511 (m/z=778.543122; rt=7.94479)**  
T/S Cluster: L-7.9-15

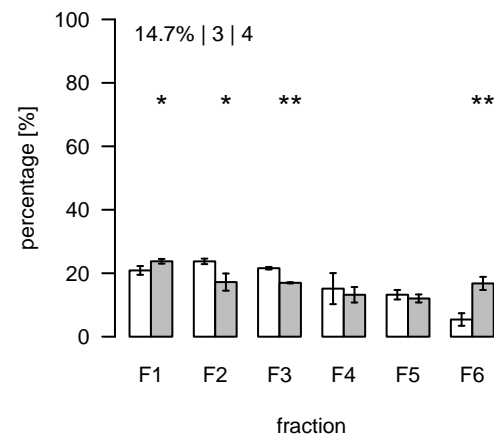

**L1513 (m/z=778.529461; rt=7.94509)**  
T/S Cluster: L-7.9-15

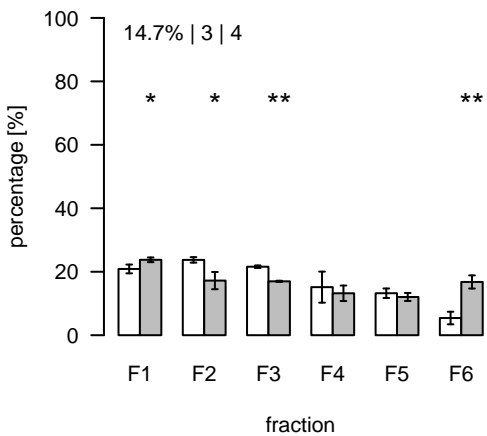

**L1512 (m/z=779.530473; rt=7.94503)**  
T/S Cluster: L-7.9-15

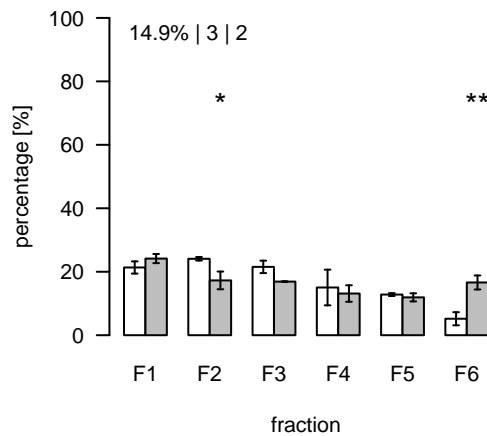

**L1510 (m/z=779.550194; rt=7.94464)**  
T/S Cluster: L-7.9-15

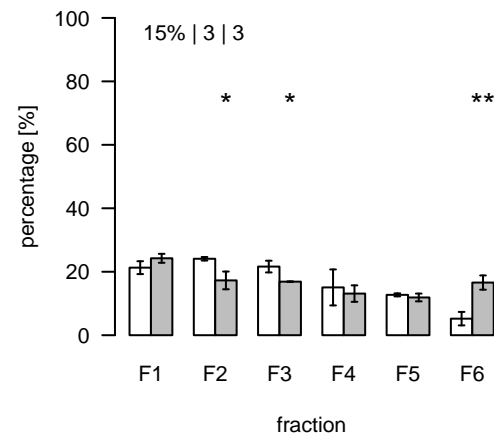

**L1521 (m/z=758.564651; rt=7.96812)**  
T/S Cluster: L-8-1

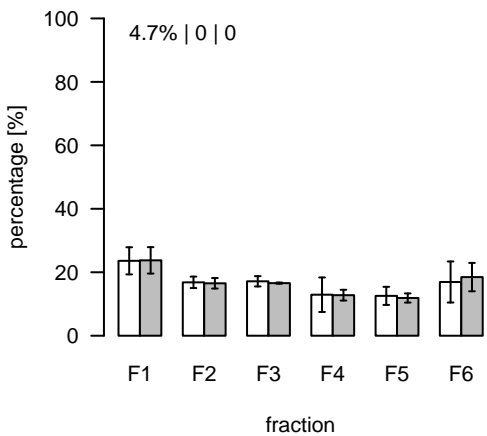

**L1517 (m/z=252.858566; rt=7.96726)**  
T/S Cluster: L-8-1

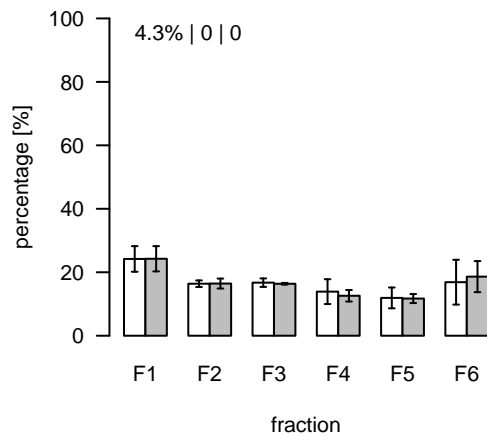

**L1515 (m/z=756.688772; rt=7.96601)**  
T/S Cluster: L-8-1

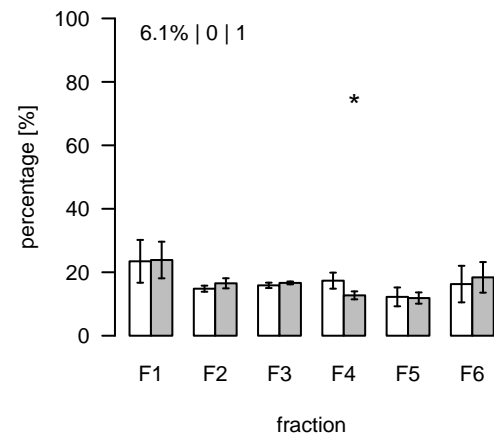

**L1514 (m/z=379.790352; rt=7.965)**  
T/S Cluster: L-8-1

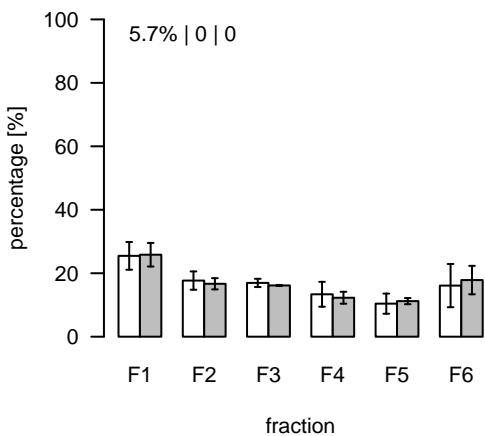

**L1522 (m/z=718.578182; rt=7.96899)**  
T/S Cluster: L-8-2

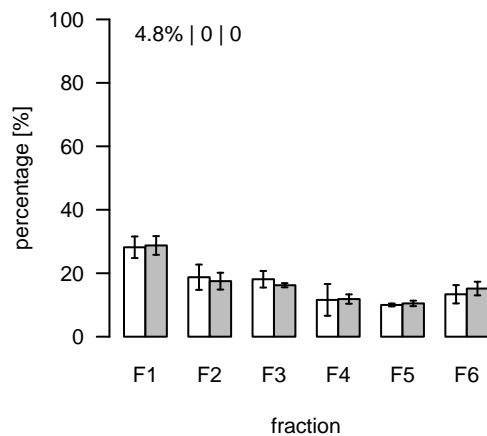

**L1516 (m/z=238.860426; rt=7.96641)**  
T/S Cluster: L-8-2

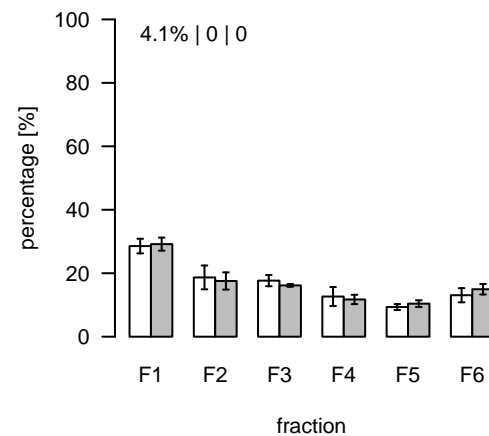

**L1518 (m/z=358.788451; rt=7.96737)**  
T/S Cluster: L-8-2

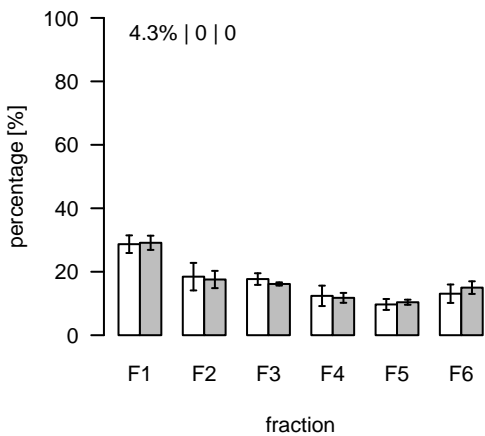

**L1519 (m/z=768.532674; rt=7.96769)**  
T/S Cluster: L-8-3

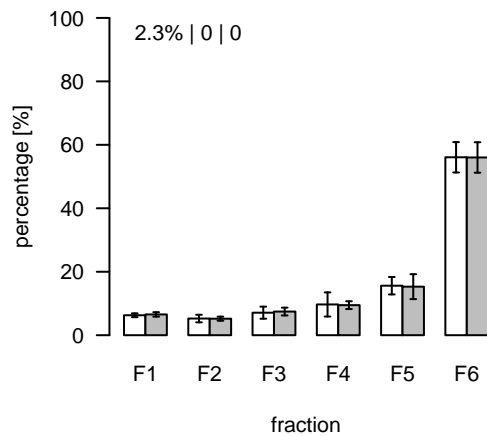

**L1532 (m/z=795.546569; rt=8.04416)**  
T/S Cluster: L-8-3

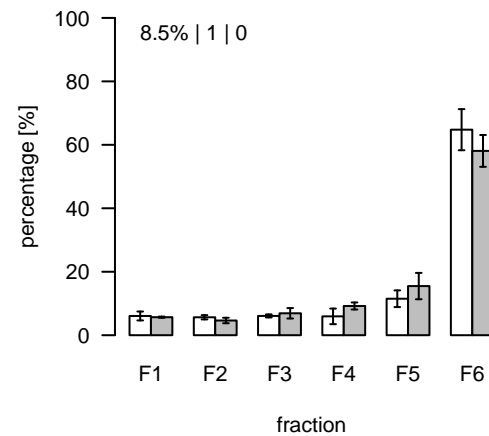

**L1520 (m/z=769.549082; rt=7.96786)**  
T/S Cluster: L-8-3

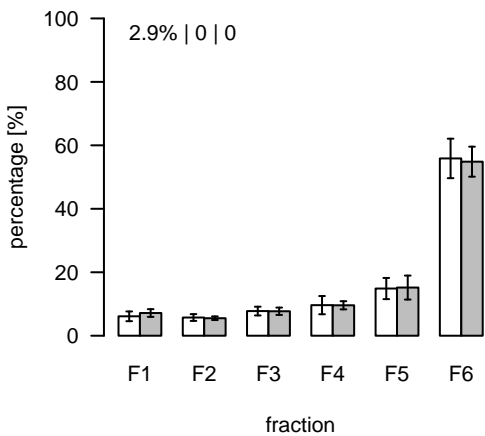

**L1528 (m/z=923.524171; rt=7.99629)**  
T/S Cluster: L-8-4

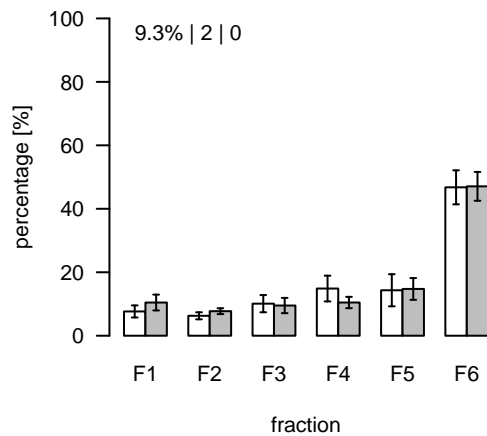

**L1530 (m/z=923.485324; rt=7.99685)**  
T/S Cluster: L-8-4

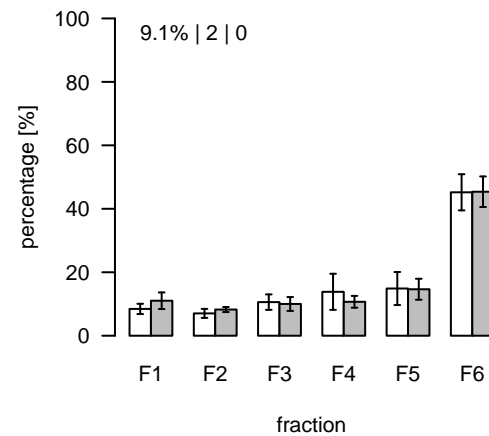



**L1527 (m/z=924.52559; rt=7.99616)**  
T/S Cluster: L-8-4

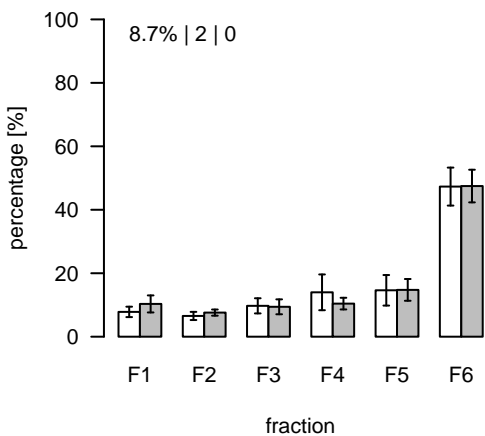

**L1529 (m/z=924.496896; rt=7.99679)**  
T/S Cluster: L-8-4

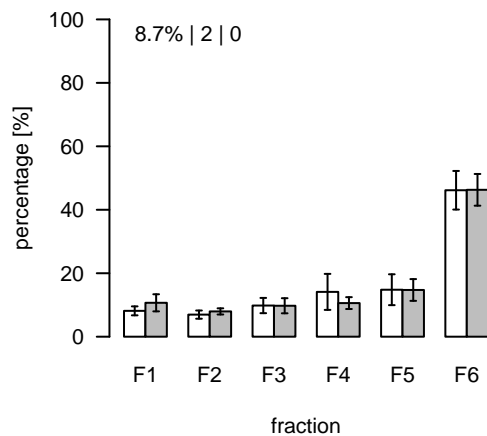

**L1525 (m/z=925.527831; rt=7.99541)**  
T/S Cluster: L-8-4

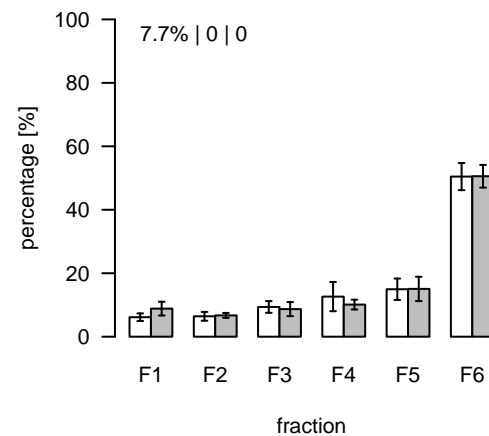

**L1526 (m/z=925.507558; rt=7.99564)**  
T/S Cluster: L-8-4

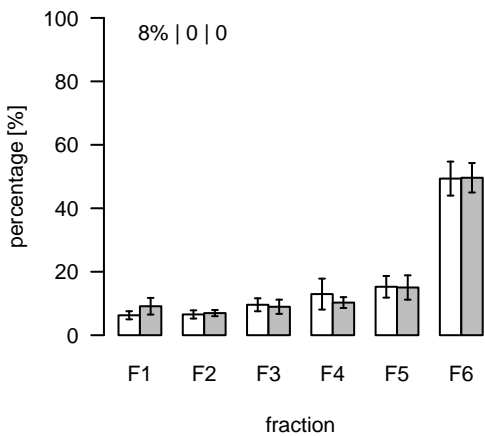

**L1524 (m/z=926.508072; rt=7.9954)**  
T/S Cluster: L-8-4

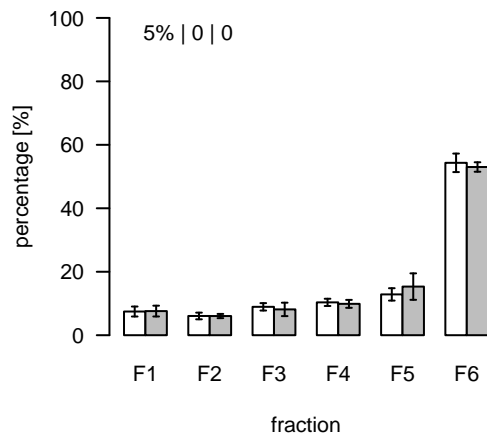

**L1523 (m/z=926.535366; rt=7.99465)**  
T/S Cluster: L-8-4

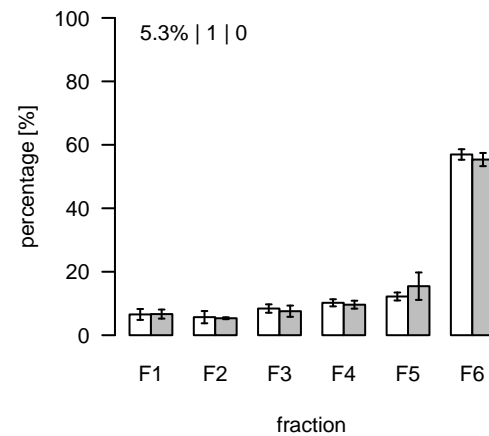

**L1531 (m/z=794.530419; rt=8.02115)**  
T/S Cluster: L-8-5

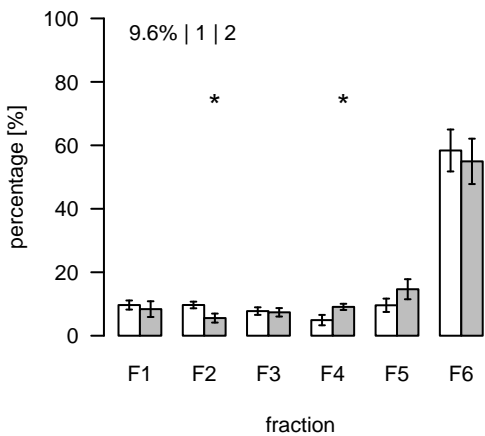

**L1558 (m/z=794.582634; rt=8.05743)**  
T/S Cluster: L-8.1-1

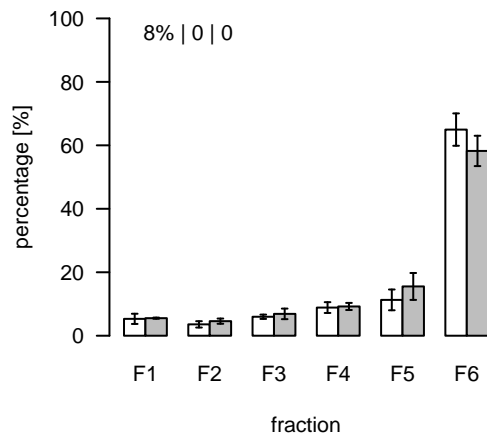

**L1533 (m/z=958.652059; rt=8.05091)**  
T/S Cluster: L-8.1-1

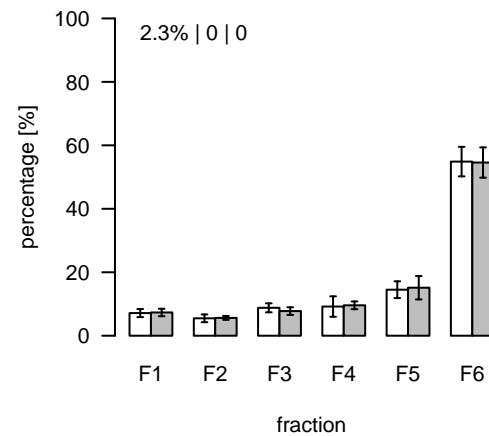

**L1560 (m/z=795.586014; rt=8.05749)**  
T/S Cluster: L-8.1-1

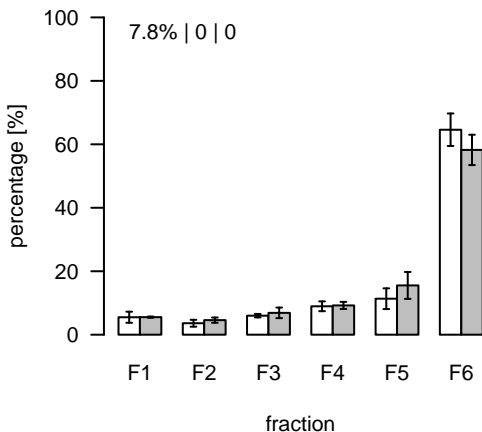

**L1536 (m/z=958.614693; rt=8.05113)**  
T/S Cluster: L-8.1-1

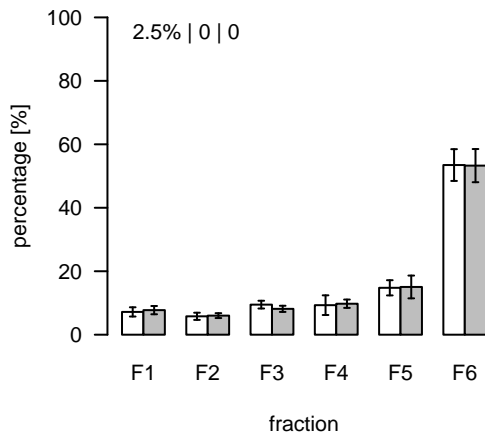

**L1534 (m/z=959.657687; rt=8.05104)**  
T/S Cluster: L-8.1-1

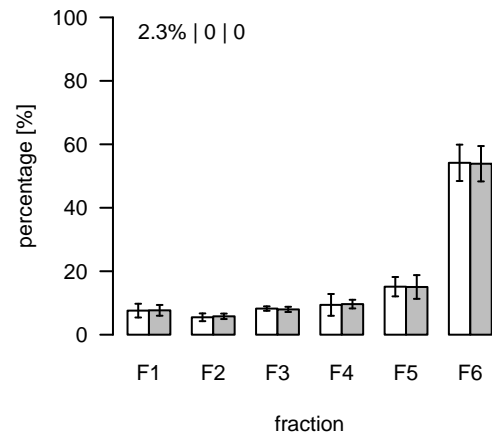

**L1535 (m/z=959.618261; rt=8.05107)**  
T/S Cluster: L-8.1-1

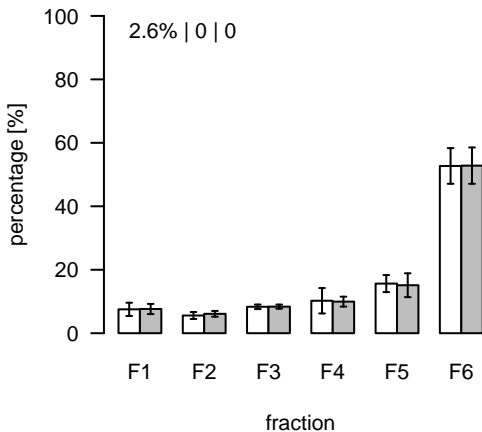

**L1564 (m/z=799.522707; rt=8.05962)**  
T/S Cluster: L-8.1-1

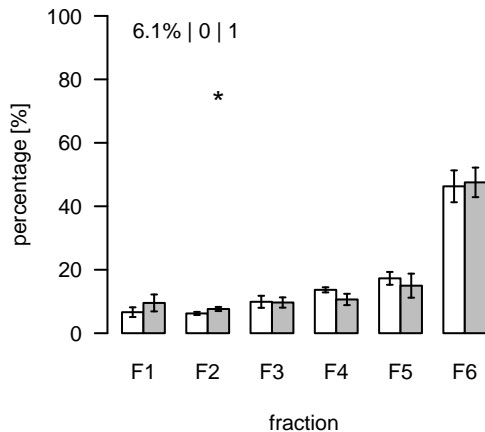

**L1562 (m/z=799.541949; rt=8.05942)**  
T/S Cluster: L-8.1-1

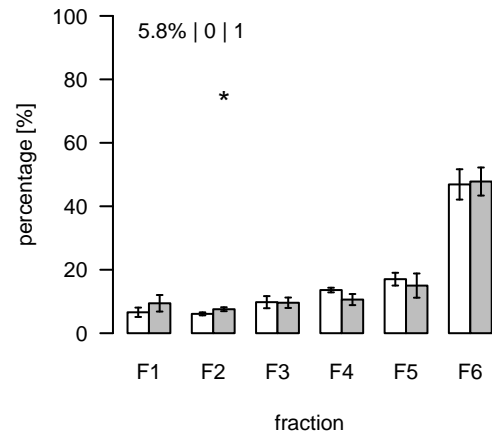

**L1548 (m/z=782.572339; rt=8.05672)**  
T/S Cluster: L-8.1-2

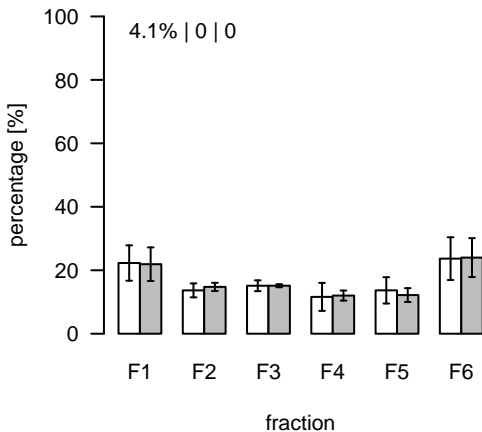

**L1546 (m/z=783.576718; rt=8.05664)**  
T/S Cluster: L-8.1-2

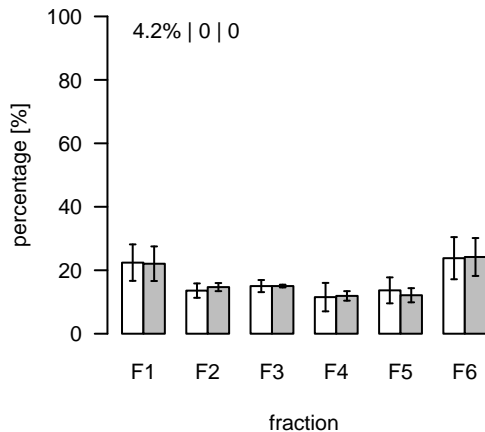

**L1544 (m/z=784.580576; rt=8.0566)**  
T/S Cluster: L-8.1-2

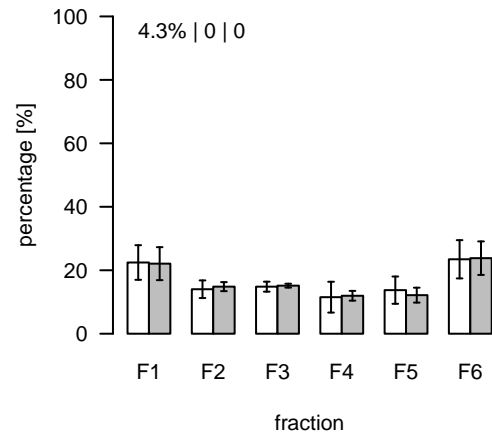

**L1552 (m/z=391.287414; rt=8.05684)**  
T/S Cluster: L-8.1-2

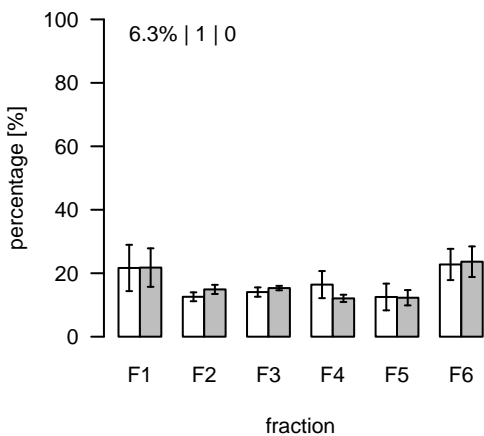

**L1555 (m/z=784.556155; rt=8.05695)**  
T/S Cluster: L-8.1-2

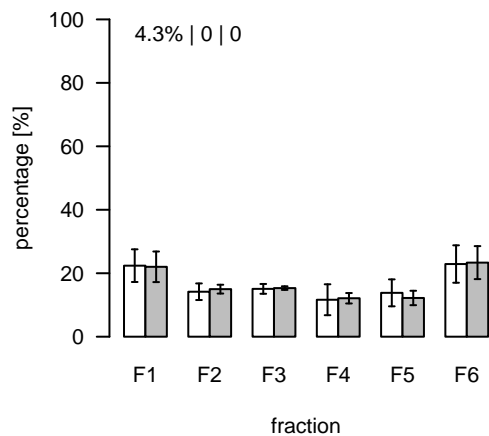

**L1551 (m/z=782.513908; rt=8.05675)**  
T/S Cluster: L-8.1-2

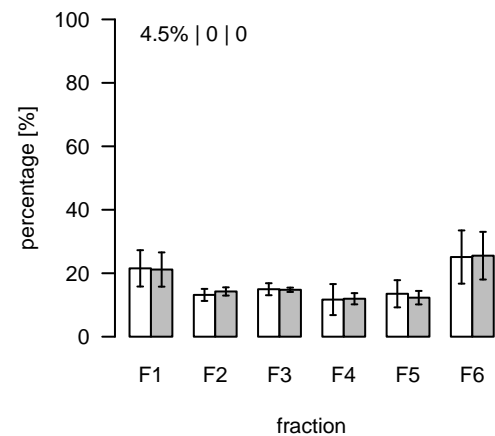

**L1547 (m/z=783.525166; rt=8.05667)**  
T/S Cluster: L-8.1-2

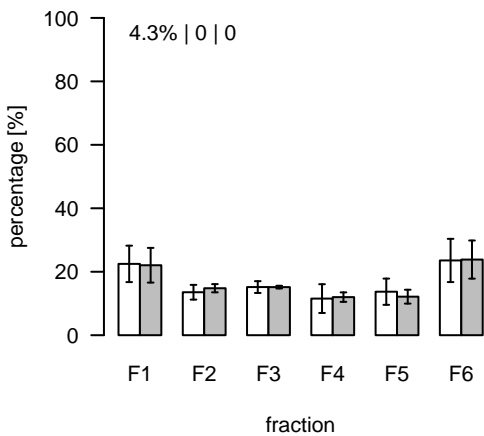

**L1543 (m/z=391.792694; rt=8.05649)**  
T/S Cluster: L-8.1-2

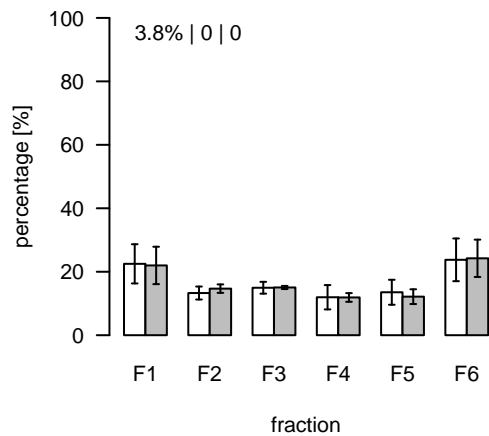

**L1554 (m/z=391.786568; rt=8.05694)**  
T/S Cluster: L-8.1-2

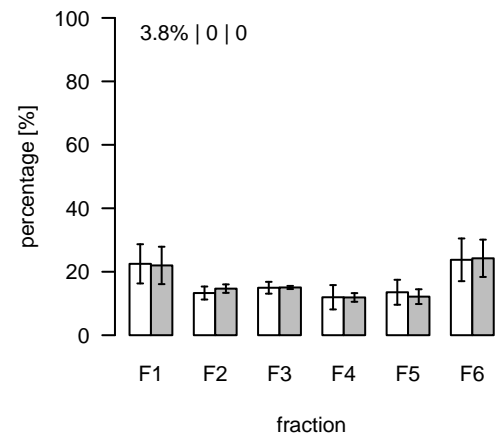

**L1549 (m/z=260.861434; rt=8.05672)**  
T/S Cluster: L-8.1-2

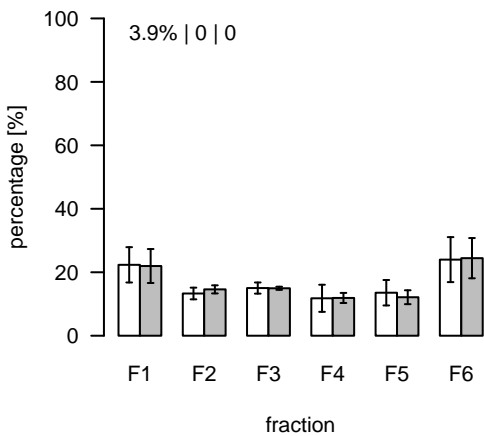

**L1556 (m/z=785.568468; rt=8.05716)**  
T/S Cluster: L-8.1-2

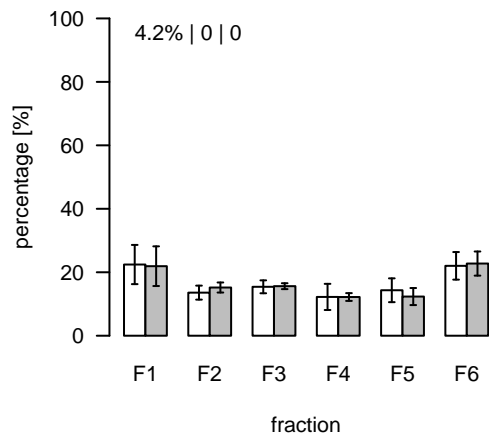

**L1553 (m/z=785.583208; rt=8.05686)**  
T/S Cluster: L-8.1-2

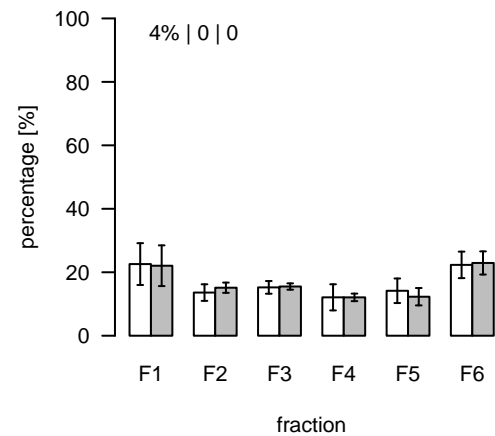

**L1545 (m/z=261.19637; rt=8.05663)**  
T/S Cluster: L-8.1-2

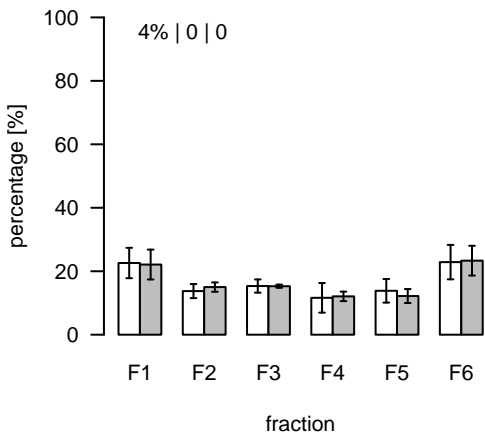

**L1561 (m/z=261.193075; rt=8.05762)**  
T/S Cluster: L-8.1-2

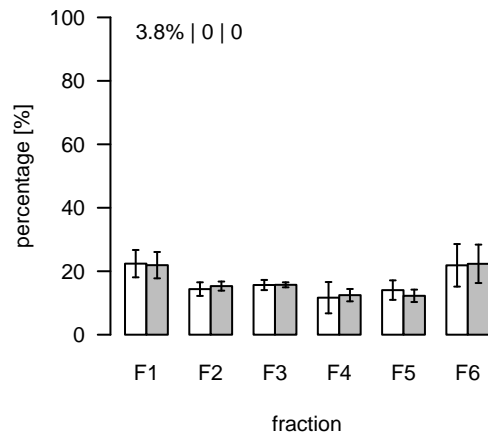

**L1559 (m/z=260.855947; rt=8.05743)**  
T/S Cluster: L-8.1-2

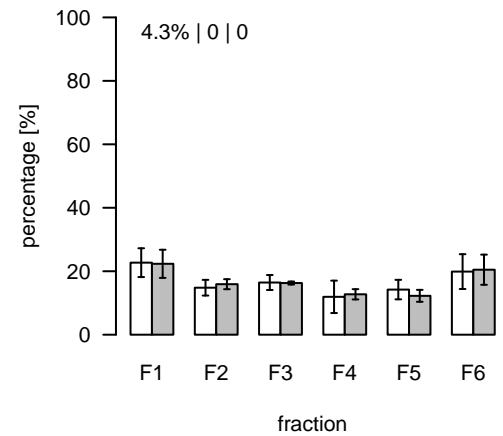

**L1550 (m/z=391.273037; rt=8.05672)**  
T/S Cluster: L-8.1-2

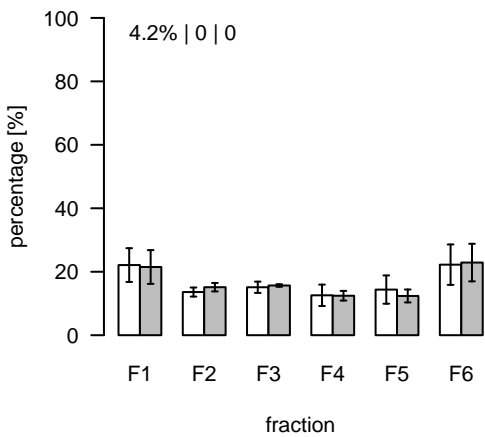

**L1538 (m/z=392.295469; rt=8.05554)**  
T/S Cluster: L-8.1-2

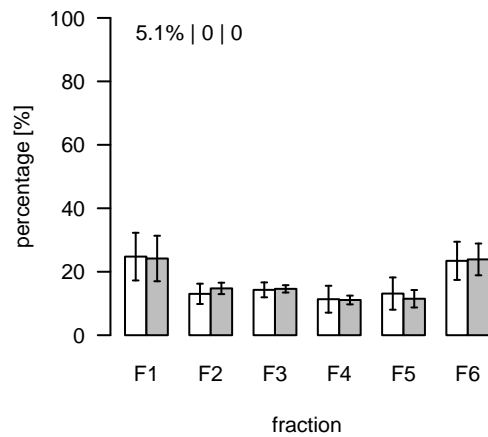

**L1537 (m/z=392.289323; rt=8.05544)**  
T/S Cluster: L-8.1-2

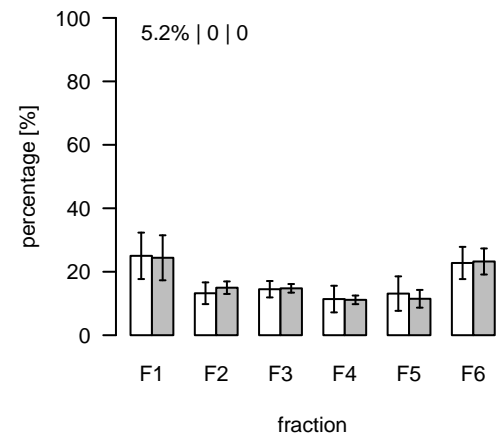

**L1557 (m/z=785.544287; rt=8.05741)**  
T/S Cluster: L-8.1-2

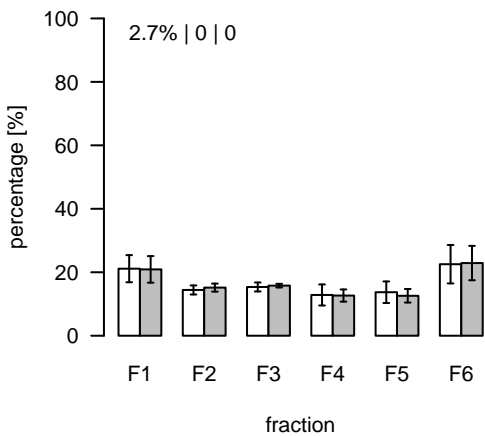

**L1572 (m/z=714.510935; rt=8.1307)**  
T/S Cluster: L-8.1-3

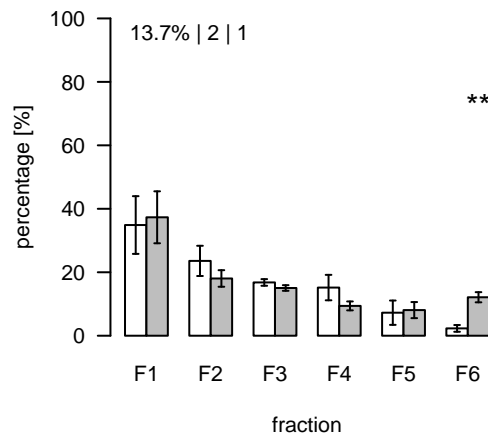

**L1574 (m/z=714.48344; rt=8.13094)**  
T/S Cluster: L-8.1-3

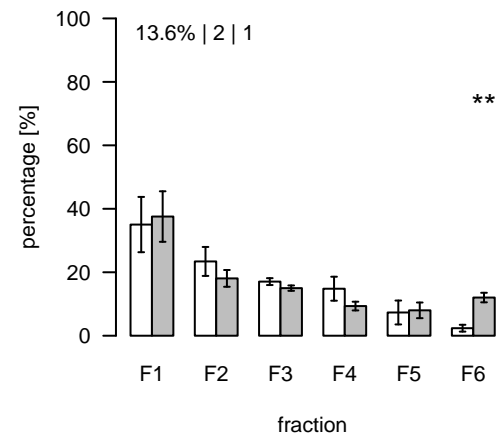

**L1571 (m/z=715.516197; rt=8.13069)**  
T/S Cluster: L-8.1-3

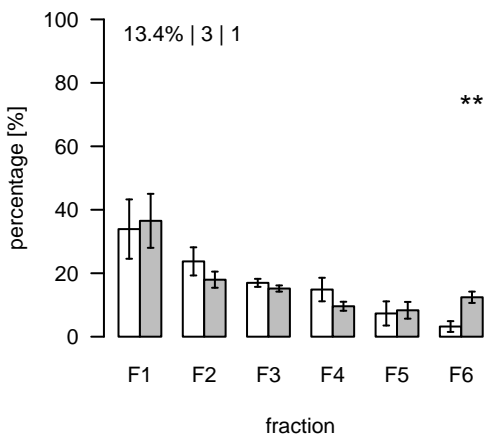

**L1573 (m/z=715.497715; rt=8.13092)**  
T/S Cluster: L-8.1-3

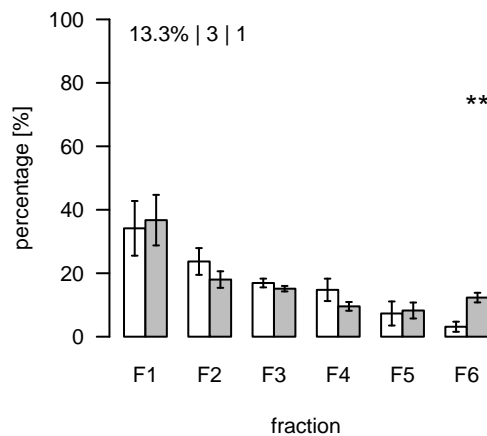

**L1540 (m/z=804.561193; rt=8.05621)**  
T/S Cluster: L-8.1-3

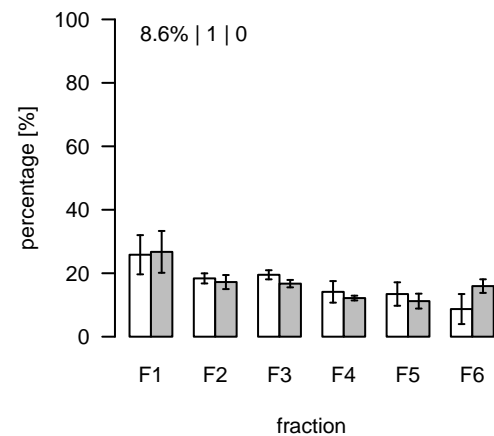

**L1541 (m/z=804.553813; rt=8.05645)**  
T/S Cluster: L-8.1-3

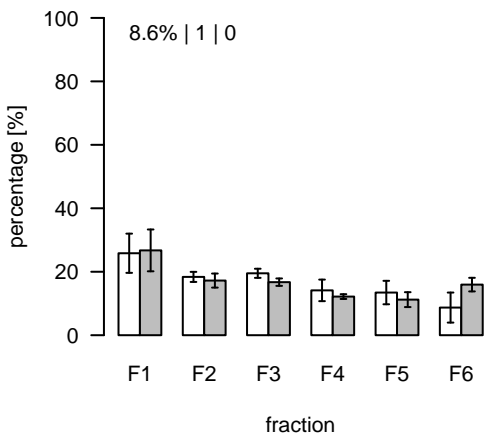

**L1539 (m/z=804.58087; rt=8.05584)**  
T/S Cluster: L-8.1-3

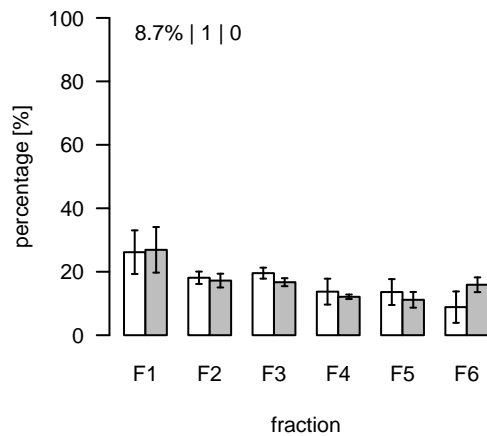

**L1542 (m/z=805.559321; rt=8.05647)**  
T/S Cluster: L-8.1-3

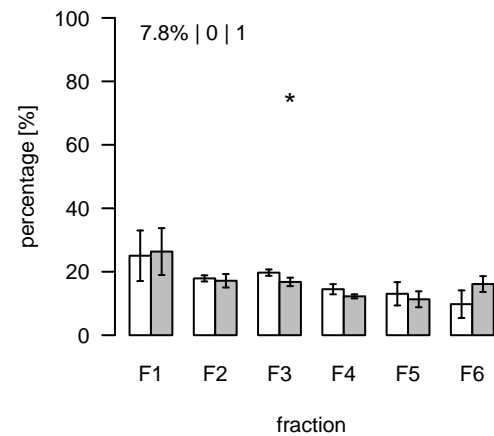

**L1563 (m/z=838.575498; rt=8.05947)**  
T/S Cluster: L-8.1-4

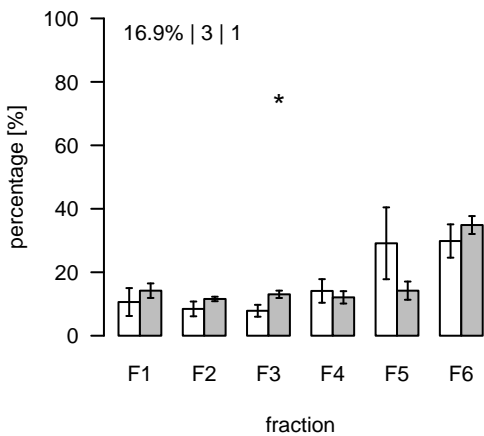

**L1565 (m/z=926.54402; rt=8.11231)**  
T/S Cluster: L-8.1-5

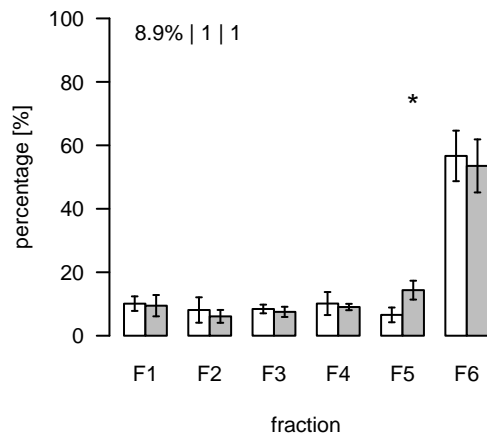

**L1567 (m/z=926.511963; rt=8.11459)**  
T/S Cluster: L-8.1-5

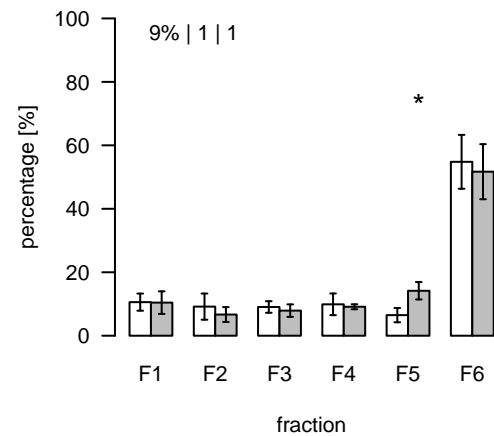

**L1566 (m/z=925.542262; rt=8.11256)**  
T/S Cluster: L-8.1-5

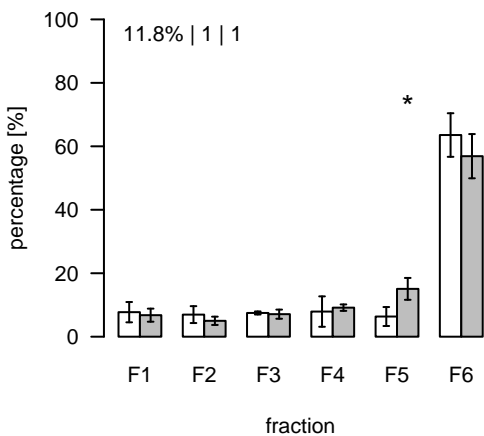

**L1568 (m/z=925.495717; rt=8.11728)**  
T/S Cluster: L-8.1-5

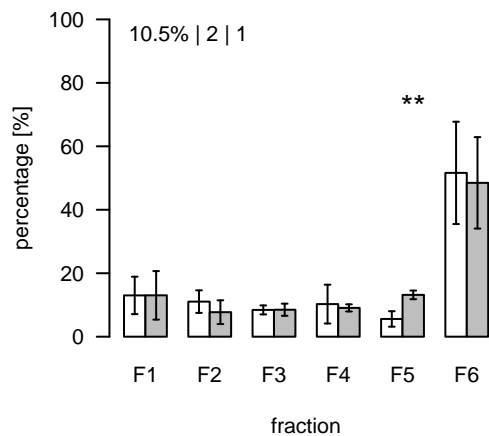

**L1569 (m/z=858.671067; rt=8.12381)**  
T/S Cluster: L-8.1-6

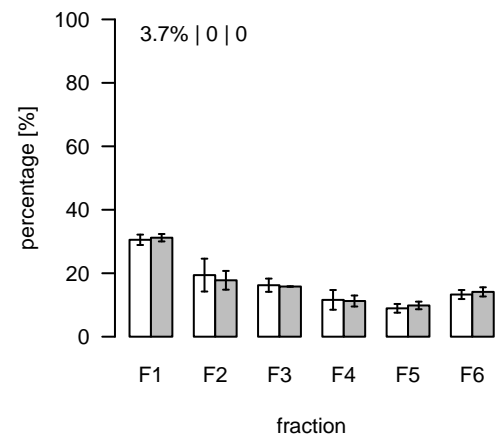

**L1570 (m/z=859.674689; rt=8.12564)**  
T/S Cluster: L-8.1-6

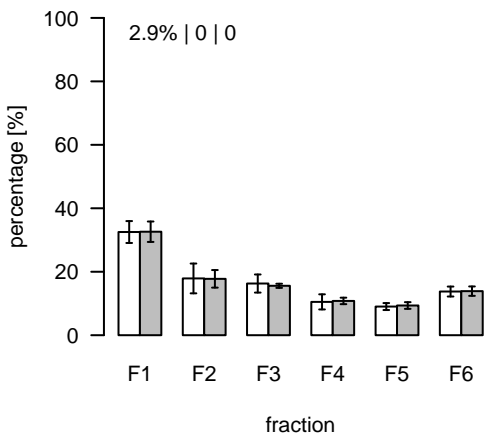

**L1575 (m/z=744.557123; rt=8.15523)**  
T/S Cluster: L-8.2-1

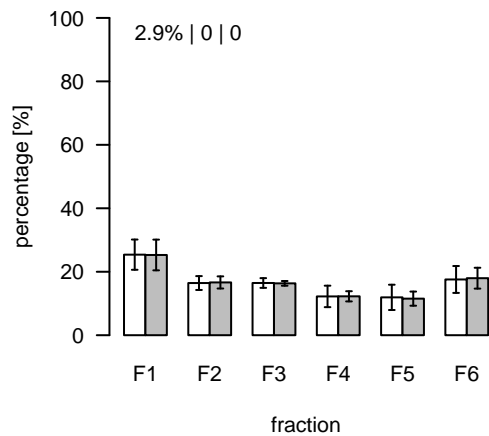

**L1576 (m/z=745.561096; rt=8.15532)**  
T/S Cluster: L-8.2-1

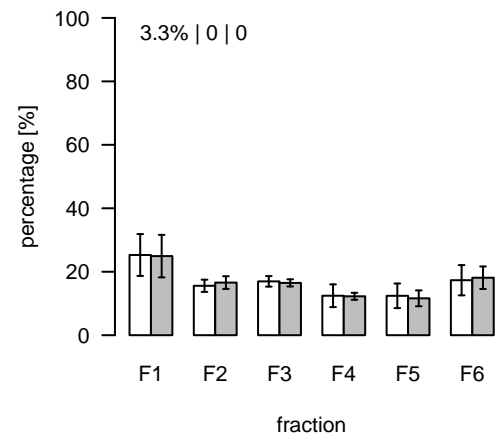

**L1583 (m/z=891.56871; rt=8.18422)**  
T/S Cluster: L-8.2-2

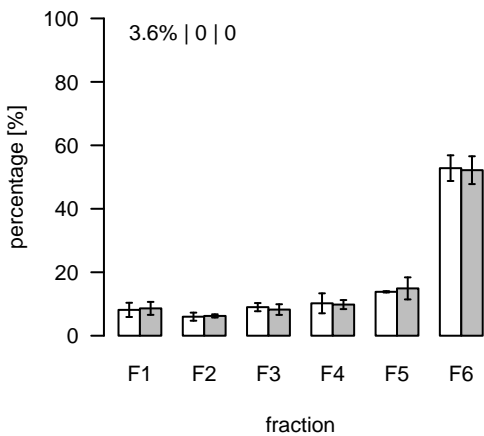

**L1584 (m/z=891.532147; rt=8.18435)**  
T/S Cluster: L-8.2-2

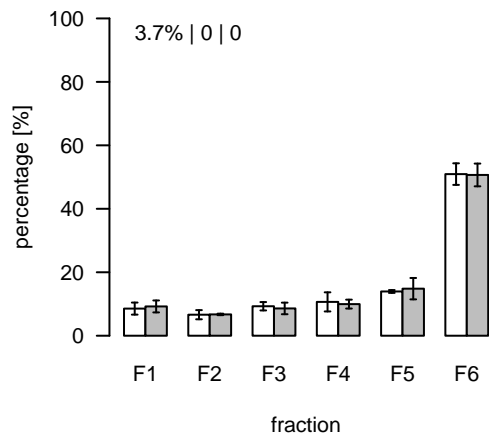

**L1581 (m/z=892.571884; rt=8.18367)**  
T/S Cluster: L-8.2-2

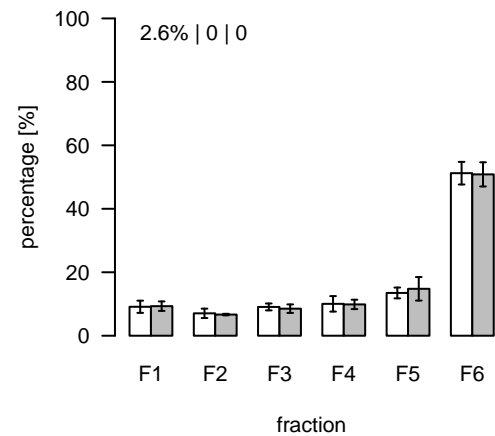

**L1577 (m/z=887.572691; rt=8.16434)**  
T/S Cluster: L-8.2-2

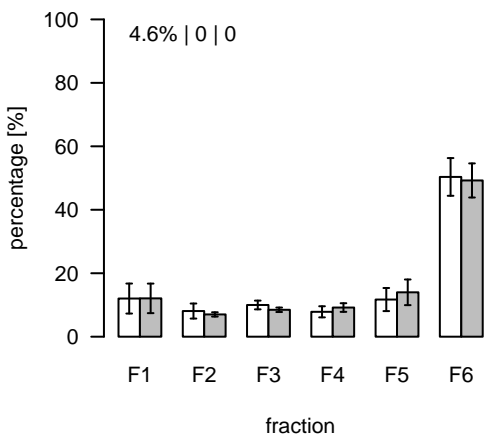

**L1582 (m/z=892.535418; rt=8.18371)**  
T/S Cluster: L-8.2-2

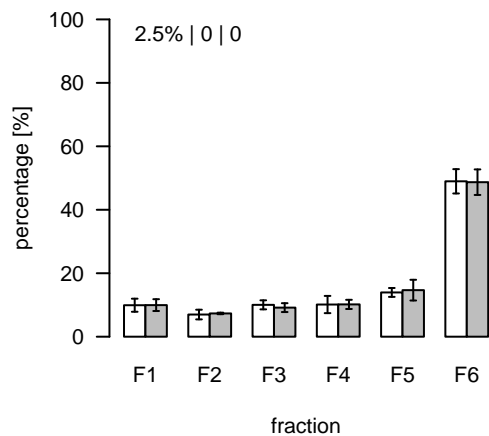

**L1578 (m/z=887.54487; rt=8.16476)**  
T/S Cluster: L-8.2-2

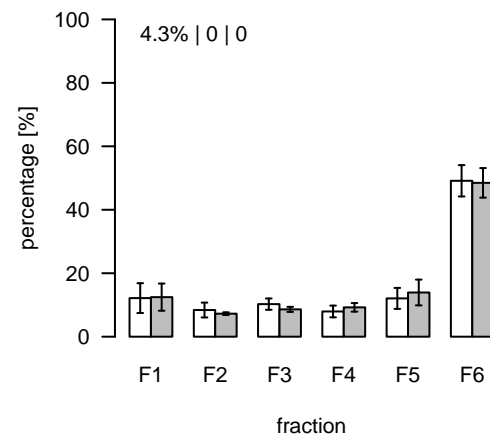

**L1579 (m/z=888.576241; rt=8.16525)**  
T/S Cluster: L-8.2-2

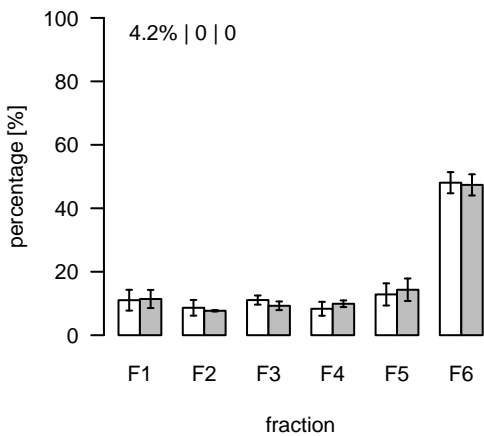

**L1580 (m/z=888.55572; rt=8.1654)**  
T/S Cluster: L-8.2-2

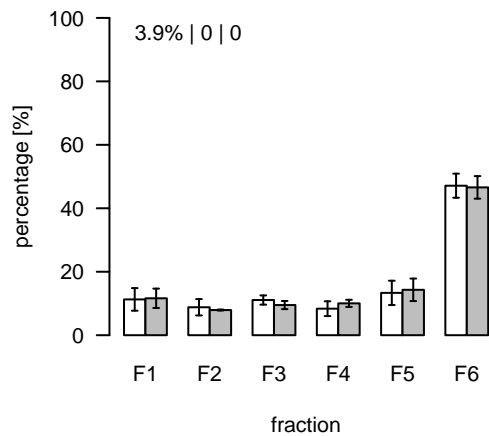

**L1593 (m/z=932.633439; rt=8.24392)**  
T/S Cluster: L-8.2-2

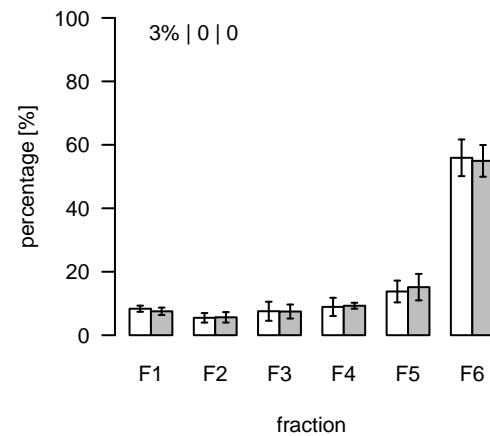

**L1594 (m/z=932.633945; rt=8.24532)**  
T/S Cluster: L-8.2-2

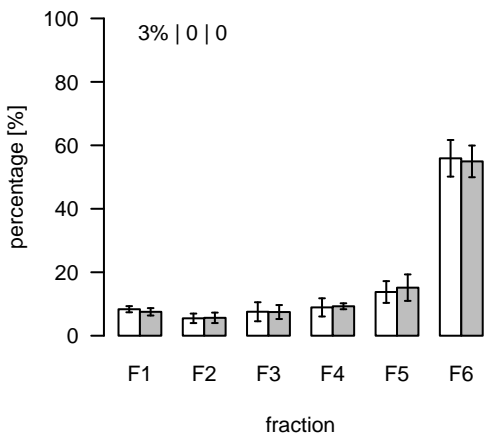

**L1590 (m/z=909.542215; rt=8.2406)**  
T/S Cluster: L-8.2-2

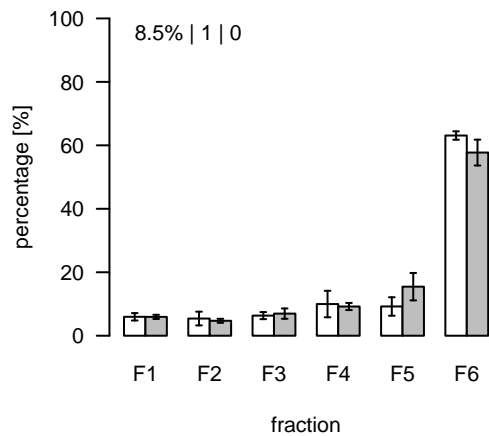

**L1592 (m/z=909.508331; rt=8.24162)**  
T/S Cluster: L-8.2-2

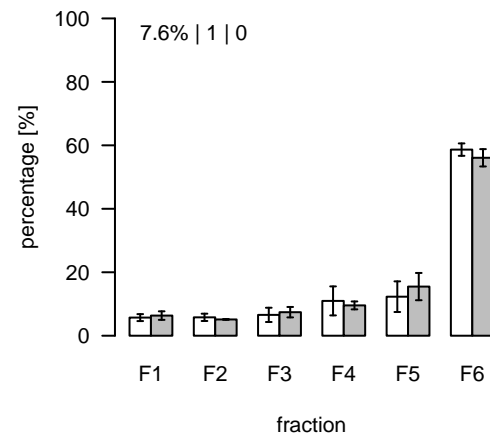

**L1589 (m/z=923.524473; rt=8.2182)**  
T/S Cluster: L-8.2-3

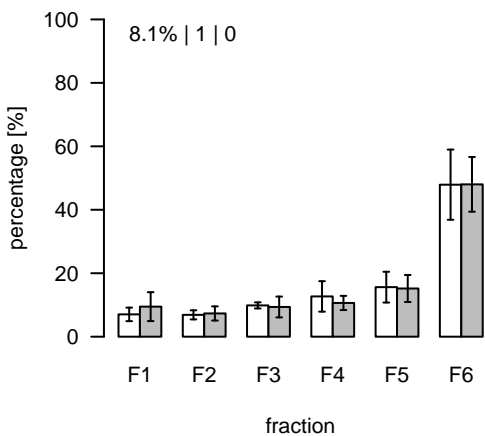

**L1586 (m/z=924.498092; rt=8.19986)**  
T/S Cluster: L-8.2-3

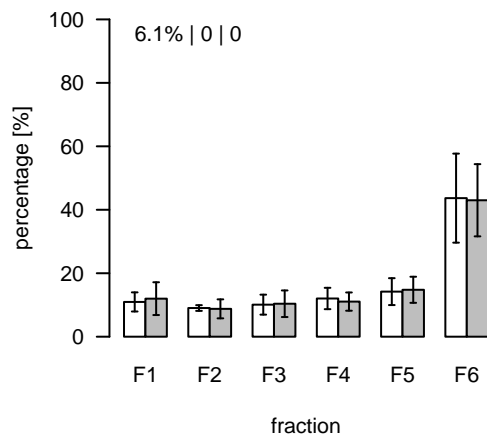

**L1585 (m/z=924.524549; rt=8.19978)**  
T/S Cluster: L-8.2-3

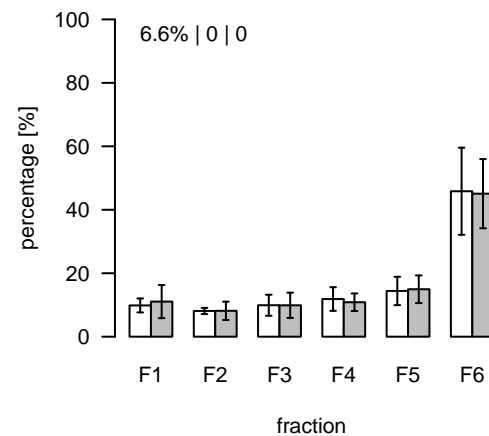

**L1587 (m/z=923.486904; rt=8.20007)**  
T/S Cluster: L-8.2-3

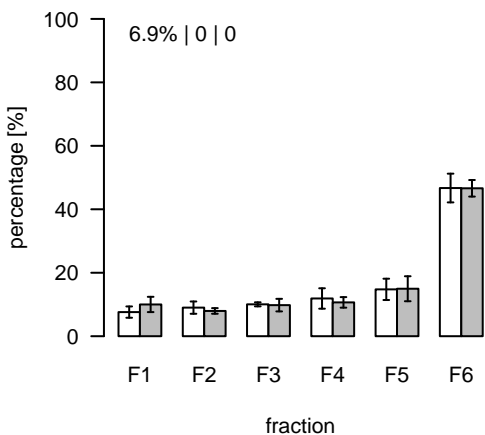

**L1588 (m/z=437.730534; rt=8.21713)**  
T/S Cluster: L-8.2-4

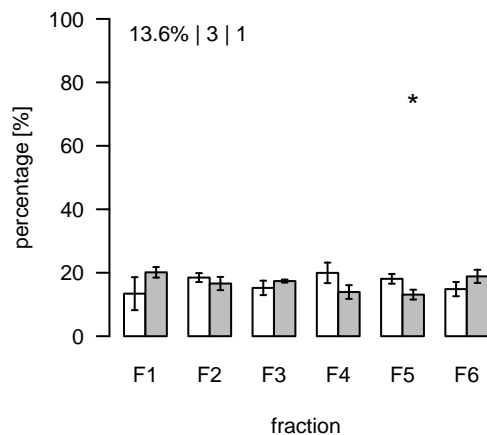

**L1595 (m/z=740.542361; rt=8.24757)**  
T/S Cluster: L-8.2-5

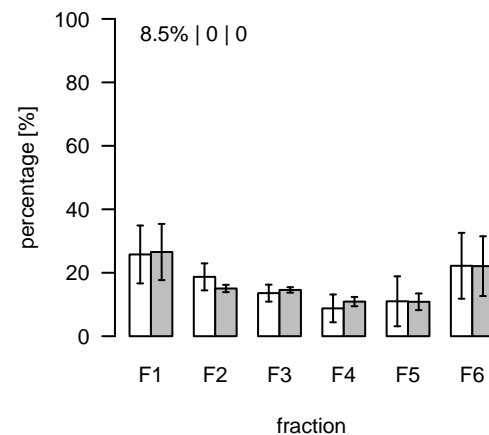

**L1591 (m/z=740.520903; rt=8.2415)**  
T/S Cluster: L-8.2-5

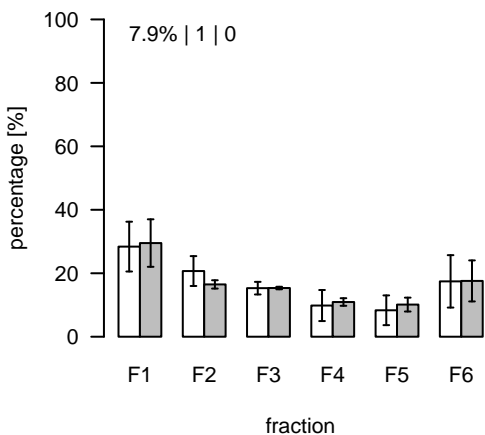

**L1600 (m/z=756.556074; rt=8.28772)**  
T/S Cluster: L-8.3-1

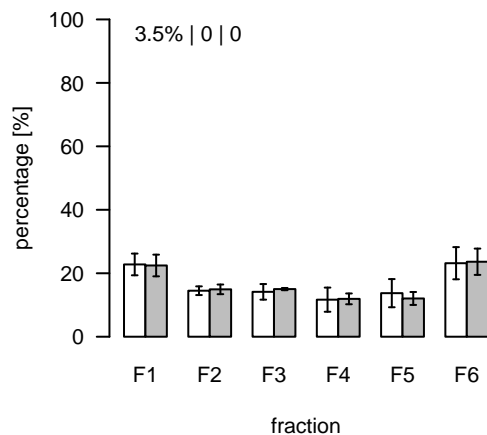

**L1601 (m/z=757.559572; rt=8.28782)**  
T/S Cluster: L-8.3-1

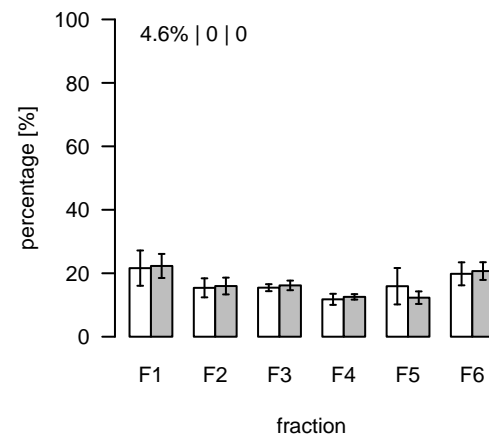



**L1597 (m/z=757.559344; rt=8.2746)**  
T/S Cluster: L-8.3-1

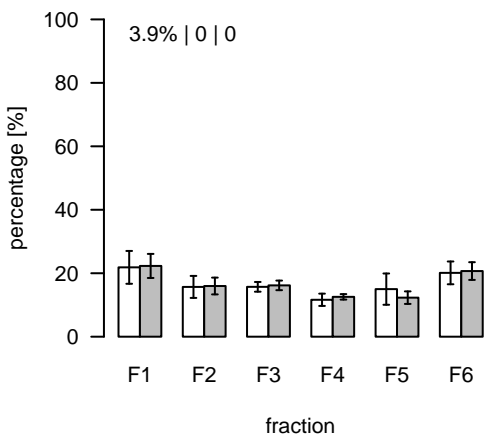

**L1596 (m/z=808.588552; rt=8.27076)**  
T/S Cluster: L-8.3-1

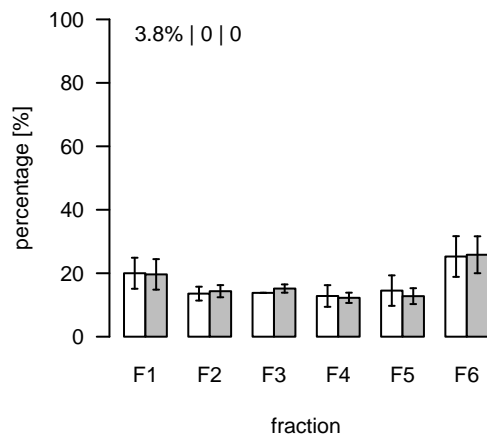

**L1599 (m/z=903.568455; rt=8.27632)**  
T/S Cluster: L-8.3-2

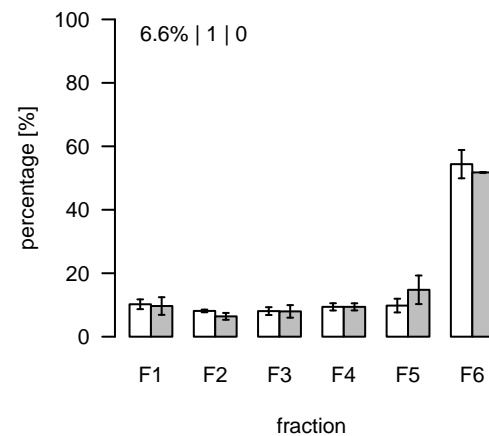

**L1598 (m/z=903.548968; rt=8.2763)**  
T/S Cluster: L-8.3-2

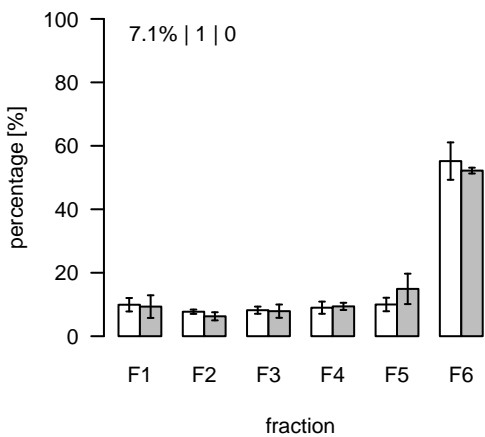

**L1603 (m/z=891.568964; rt=8.29586)**  
T/S Cluster: L-8.3-3

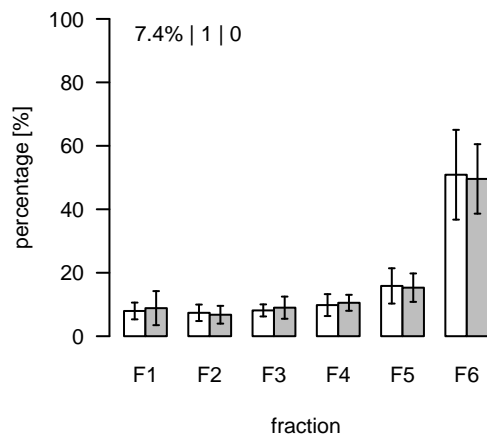

**L1602 (m/z=891.532837; rt=8.29577)**  
T/S Cluster: L-8.3-3

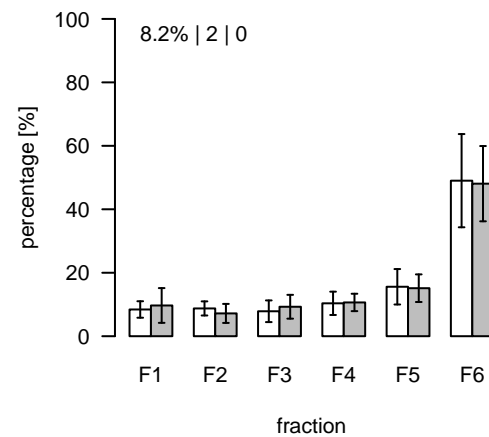

**L1606 (m/z=934.569132; rt=8.3706)**  
T/S Cluster: L-8.4-1

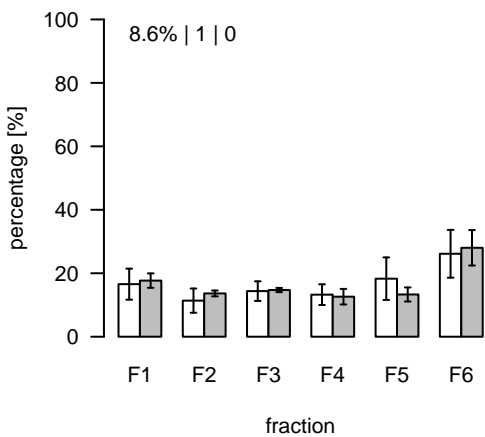

**L1604 (m/z=934.597963; rt=8.35743)**  
T/S Cluster: L-8.4-1

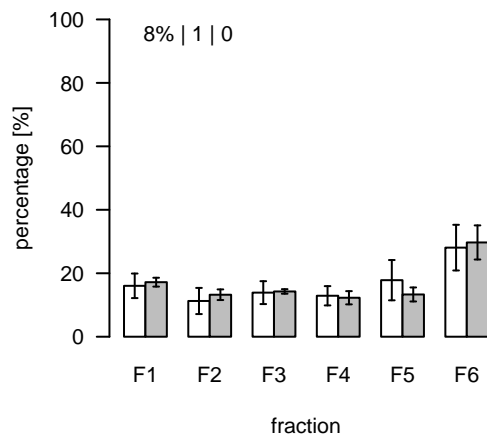

**L1605 (m/z=887.567789; rt=8.36938)**  
T/S Cluster: L-8.4-2

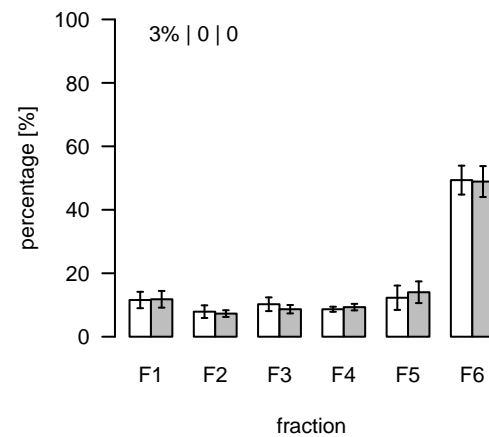

**L1607 (m/z=437.752312; rt=8.39698)**  
T/S Cluster: L-8.4-3

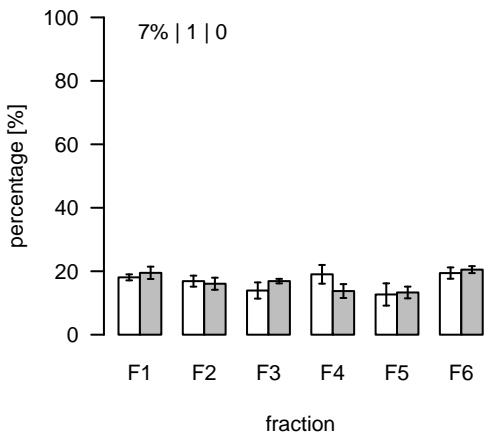

**L1610 (m/z=939.515233; rt=8.42451)**  
T/S Cluster: L-8.4-4

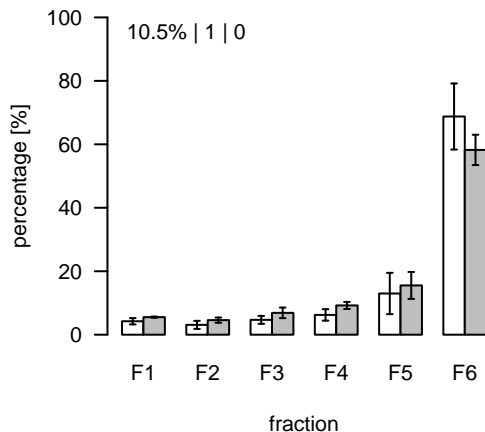

**L1612 (m/z=940.518515; rt=8.42462)**  
T/S Cluster: L-8.4-4

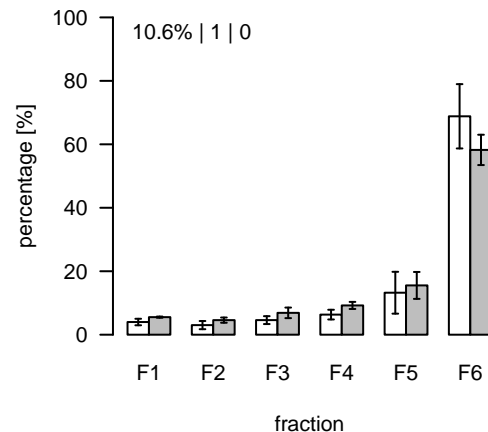

**L1613 (m/z=941.518156; rt=8.42505)**  
T/S Cluster: L-8.4-4

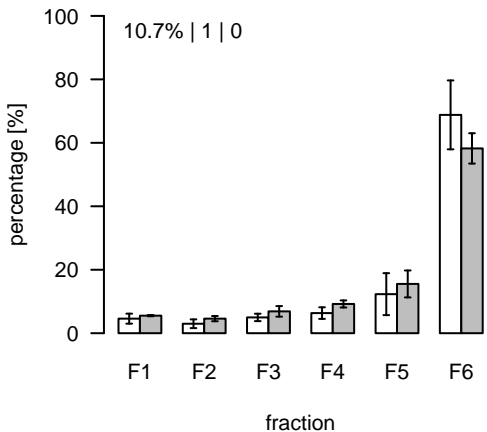

**L1608 (m/z=939.570927; rt=8.42245)**  
T/S Cluster: L-8.4-4

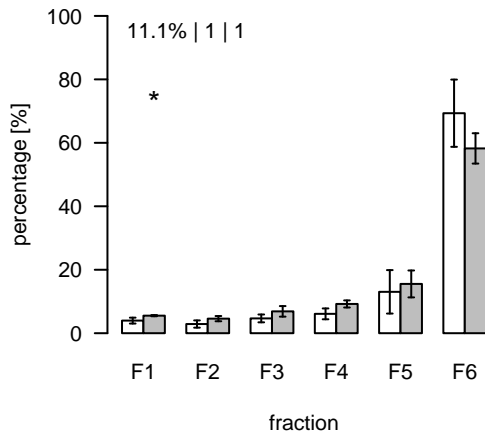

**L1611 (m/z=941.564783; rt=8.42457)**  
T/S Cluster: L-8.4-4

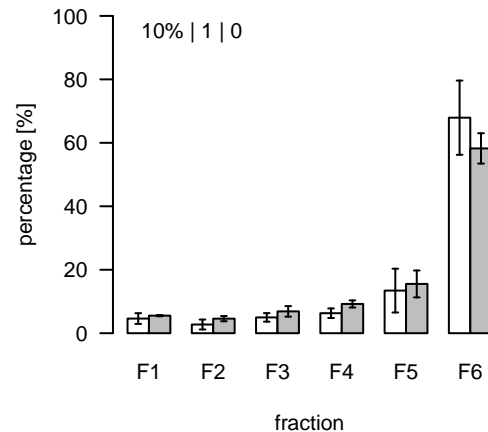

**L1609 (m/z=940.576795; rt=8.42258)**  
T/S Cluster: L-8.4-4

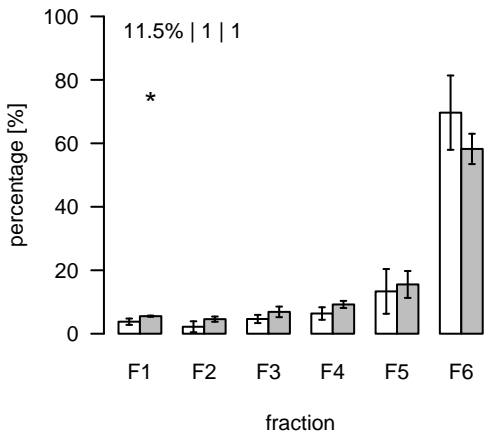

**L1616 (m/z=766.563327; rt=8.43323)**  
T/S Cluster: L-8.4-5

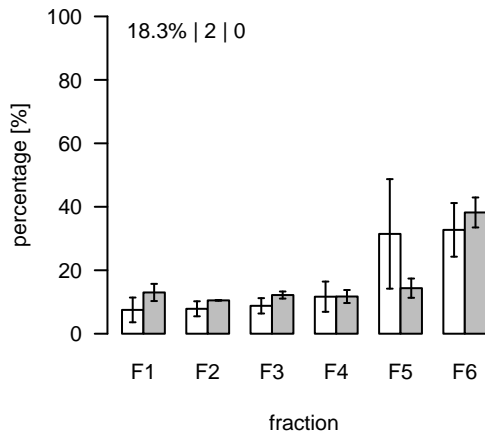

**L1614 (m/z=766.535652; rt=8.43285)**  
T/S Cluster: L-8.4-5

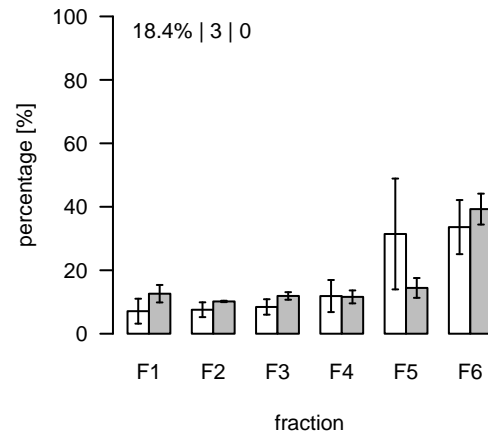

**L1617 (m/z=767.567724; rt=8.43336)**  
T/S Cluster: L-8.4-5

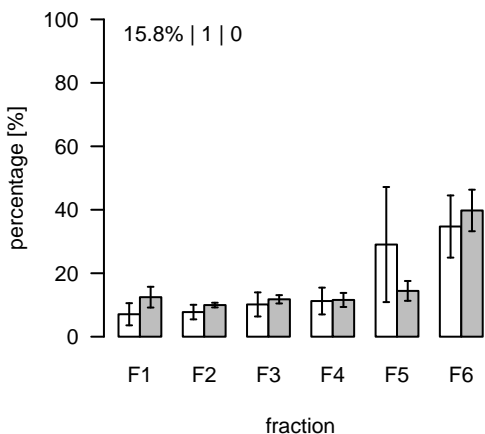

**L1615 (m/z=767.547125; rt=8.43303)**  
T/S Cluster: L-8.4-5

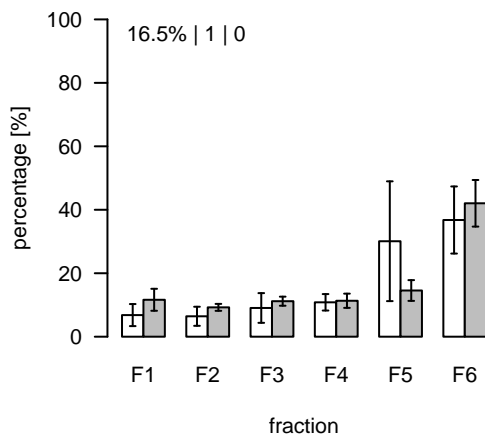

**L1619 (m/z=732.559317; rt=8.47383)**  
T/S Cluster: L-8.5-1

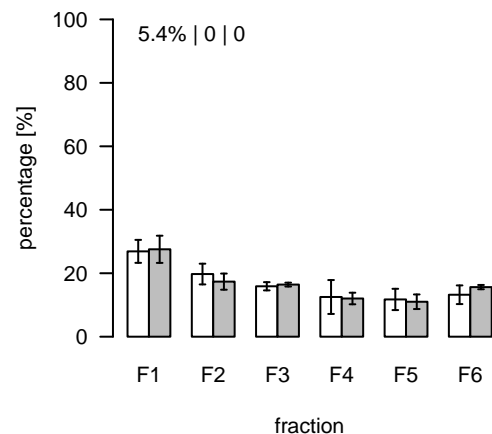

**L1620 (m/z=732.538311; rt=8.47433)**  
T/S Cluster: L-8.5-1

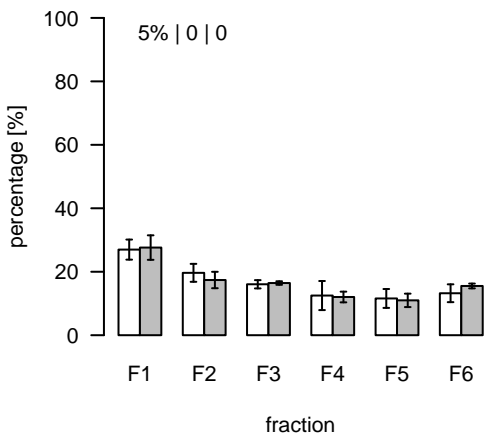

**L1618 (m/z=733.560851; rt=8.47337)**  
T/S Cluster: L-8.5-1

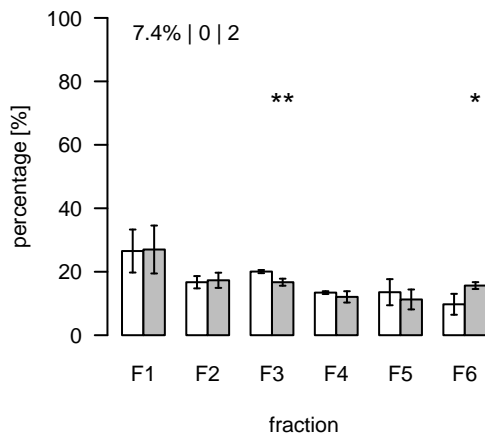

**L1621 (m/z=771.547333; rt=8.47575)**  
T/S Cluster: L-8.5-2

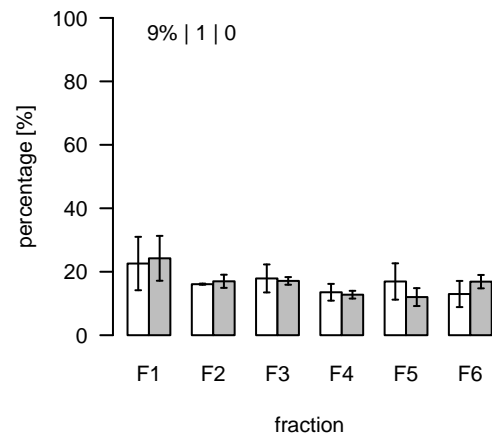

**L1622 (m/z=770.57505; rt=8.48277)**  
T/S Cluster: L-8.5-3

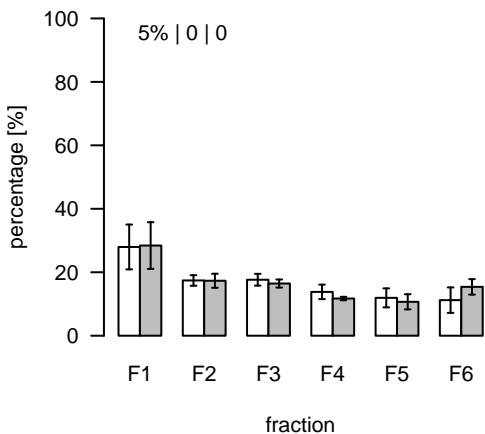

**L1623 (m/z=770.55412; rt=8.48315)**  
T/S Cluster: L-8.5-3

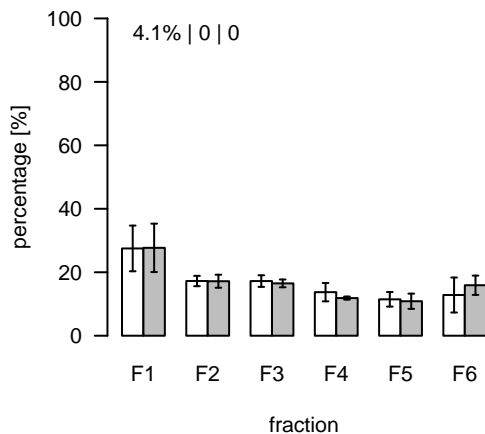

**L1624 (m/z=771.575135; rt=8.48323)**  
T/S Cluster: L-8.5-3

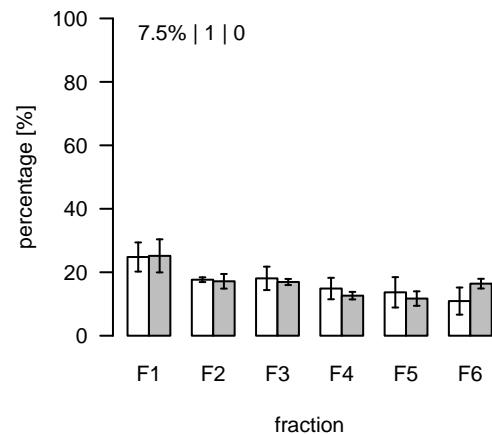

**L1625 (m/z=923.522508; rt=8.492)**  
T/S Cluster: L-8.5-4

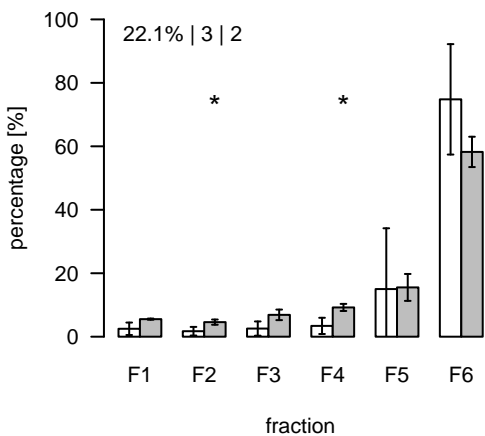

**L1626 (m/z=923.485406; rt=8.49256)**  
T/S Cluster: L-8.5-4

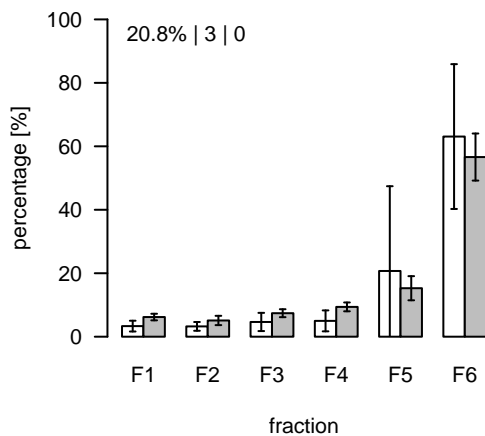

**L1628 (m/z=904.572552; rt=8.55178)**  
T/S Cluster: L-8.6-1

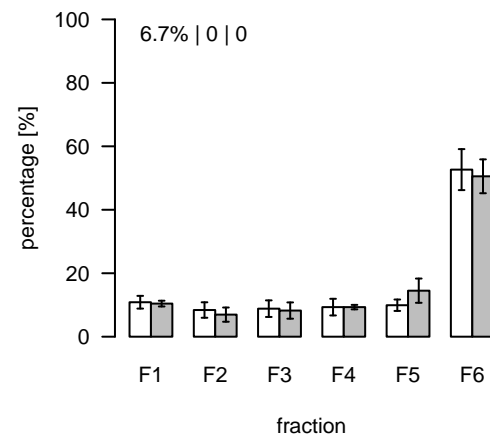

**L1627 (m/z=904.542929; rt=8.5506)**  
T/S Cluster: L-8.6-1

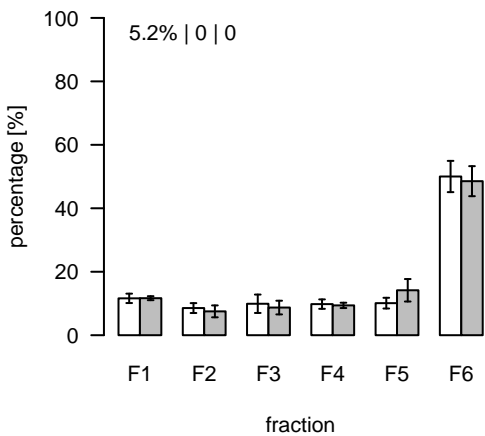

**L1630 (m/z=903.569045; rt=8.55883)**  
T/S Cluster: L-8.6-2

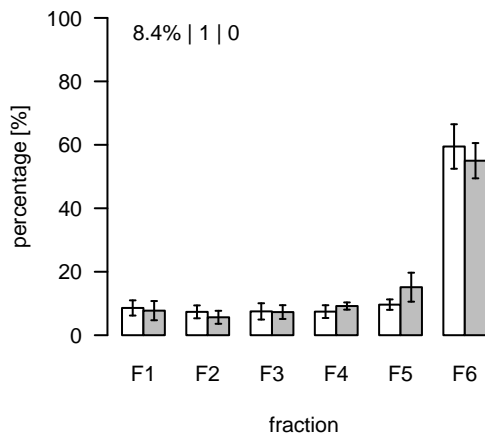

**L1629 (m/z=903.533415; rt=8.55735)**  
T/S Cluster: L-8.6-2

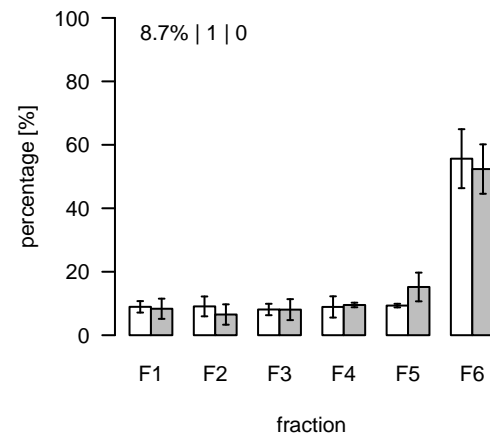

**L1631 (m/z=887.575428; rt=8.59518)**  
T/S Cluster: L-8.6-3

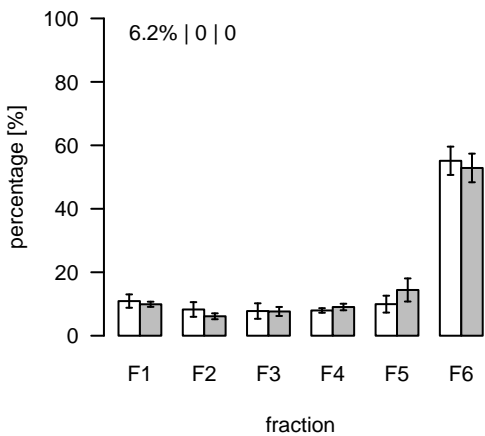

**L1632 (m/z=887.545378; rt=8.59721)**  
T/S Cluster: L-8.6-3

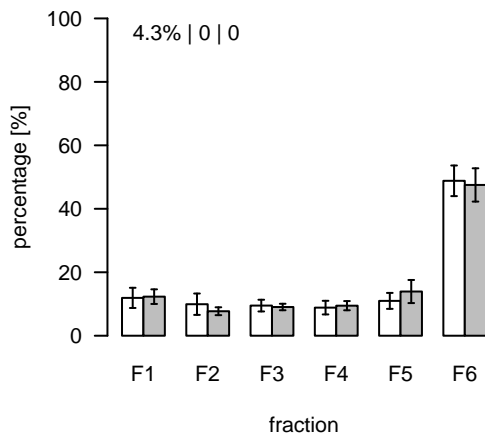

**L1633 (m/z=366.279522; rt=8.60107)**  
T/S Cluster: L-8.6-4

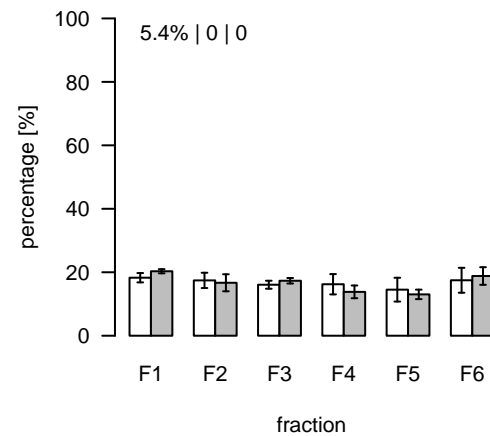

**L1636 (m/z=732.559326; rt=8.60172)**  
T/S Cluster: L-8.6-5

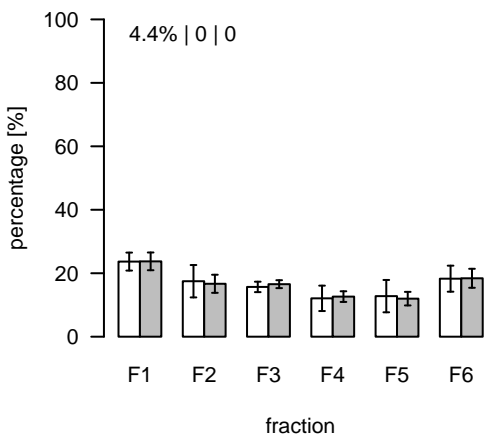

**L1634 (m/z=732.537958; rt=8.6011)**  
T/S Cluster: L-8.6-5

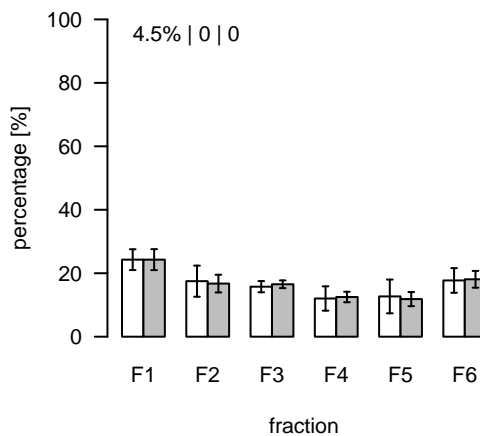

**L1635 (m/z=733.561099; rt=8.60162)**  
T/S Cluster: L-8.6-5

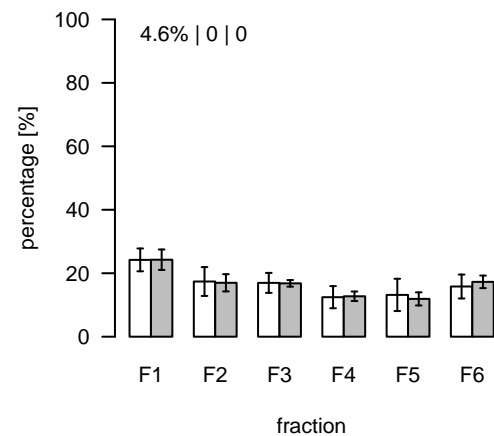

**L1658 (m/z=934.651585; rt=8.64277)**  
T/S Cluster: L-8.6-6

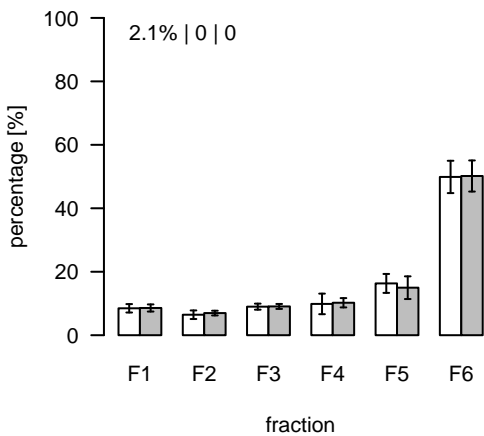

**L1652 (m/z=935.655344; rt=8.64246)**  
T/S Cluster: L-8.6-6

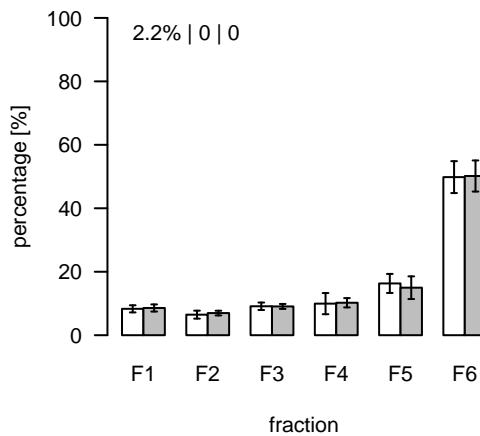

**L1657 (m/z=936.658946; rt=8.64271)**  
T/S Cluster: L-8.6-6

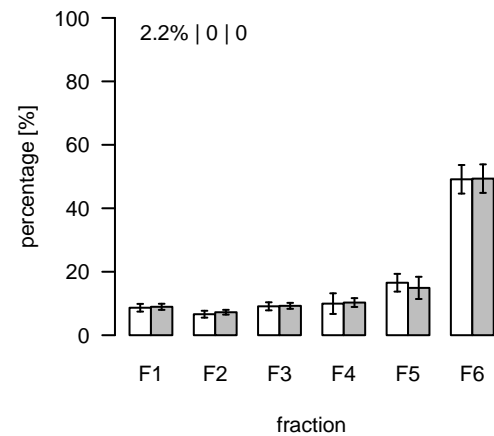

**L1650 (m/z=934.585655; rt=8.64118)**  
T/S Cluster: L-8.6-6

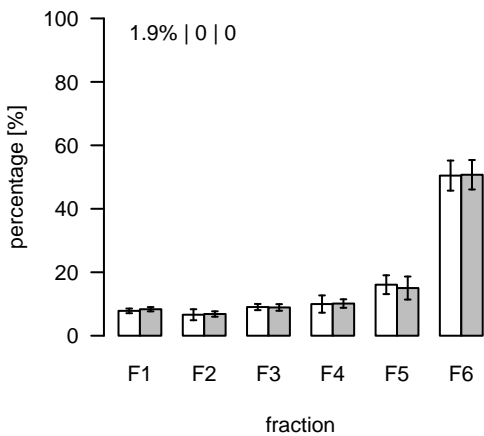

**L1651 (m/z=936.623615; rt=8.64135)**  
T/S Cluster: L-8.6-6

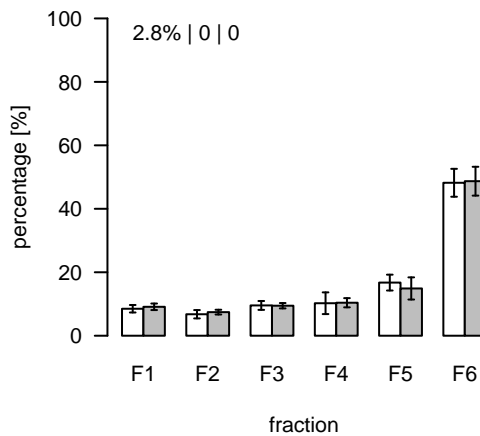

**L1654 (m/z=467.324512; rt=8.64248)**  
T/S Cluster: L-8.6-6

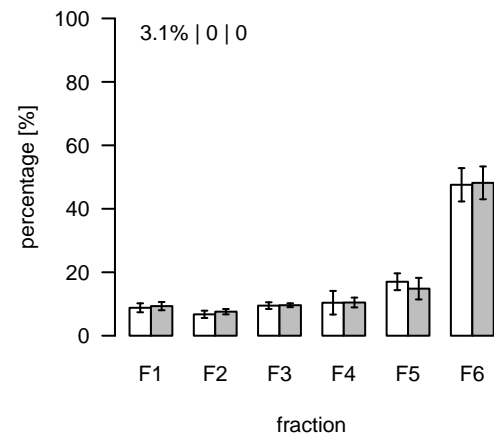

**L1660 (m/z=467.3301; rt=8.64386)**  
T/S Cluster: L-8.6-6

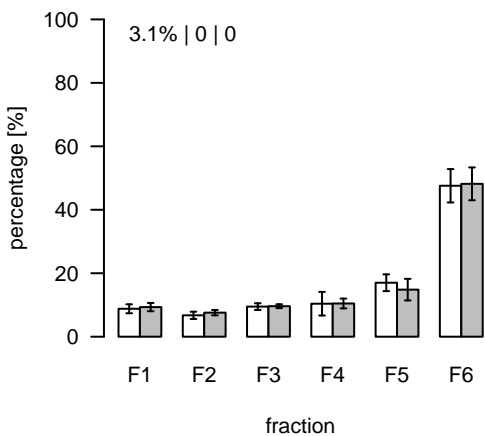

**L1653 (m/z=467.827005; rt=8.64247)**  
T/S Cluster: L-8.6-6

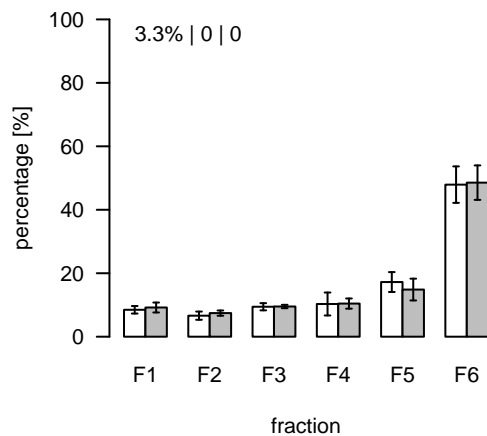

**L1655 (m/z=935.578986; rt=8.64251)**  
T/S Cluster: L-8.6-6

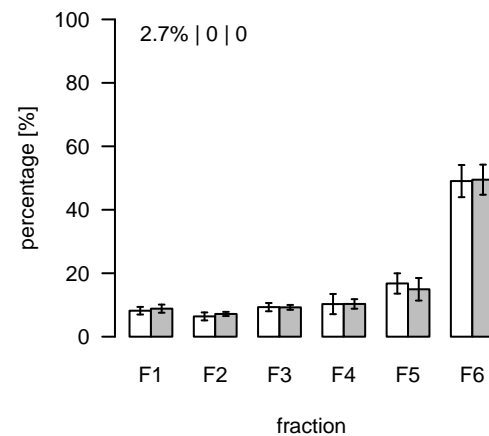

**L1661 (m/z=467.835784; rt=8.64445)**  
T/S Cluster: L-8.6-6

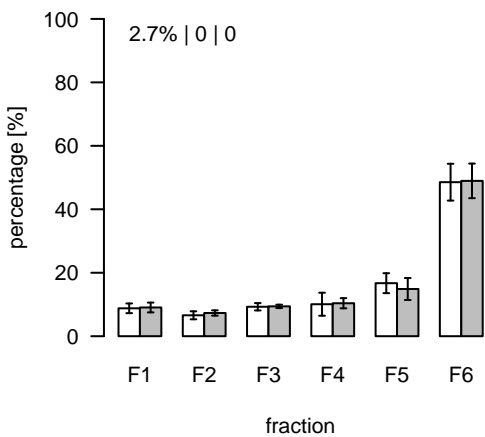

**L1656 (m/z=937.66167; rt=8.64251)**  
T/S Cluster: L-8.6-6

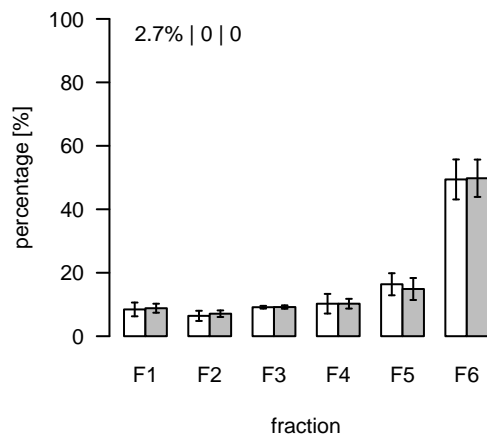

**L1639 (m/z=937.661198; rt=8.62079)**  
T/S Cluster: L-8.6-6

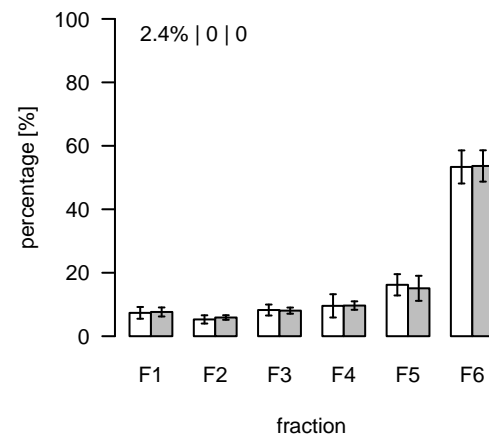

**L1659 (m/z=311.555899; rt=8.64356)**  
T/S Cluster: L-8.6-6

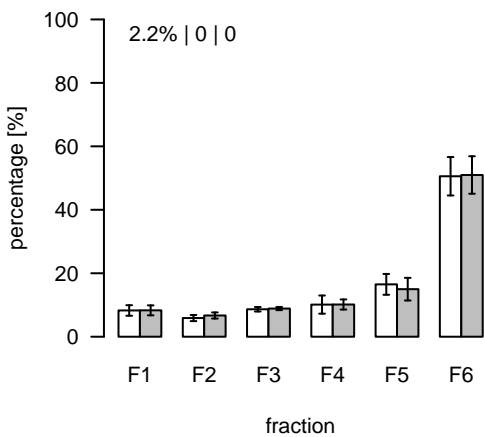

**L1648 (m/z=311.551099; rt=8.63872)**  
T/S Cluster: L-8.6-6

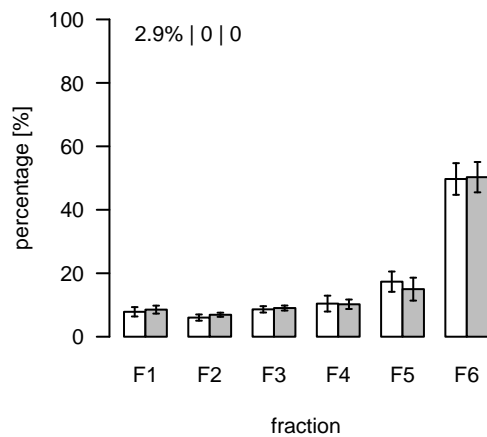

**L1637 (m/z=901.552226; rt=8.61471)**  
T/S Cluster: L-8.6-6

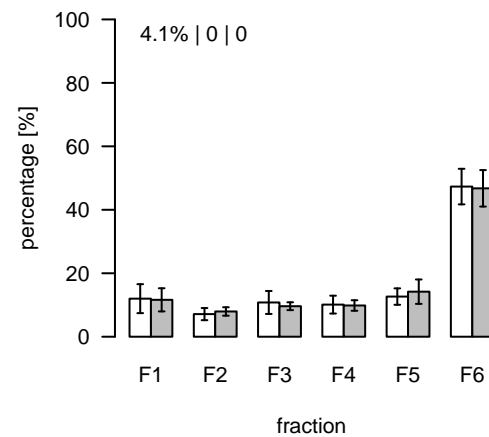

**L1641 (m/z=901.554022; rt=8.62948)**  
T/S Cluster: L-8.6-6

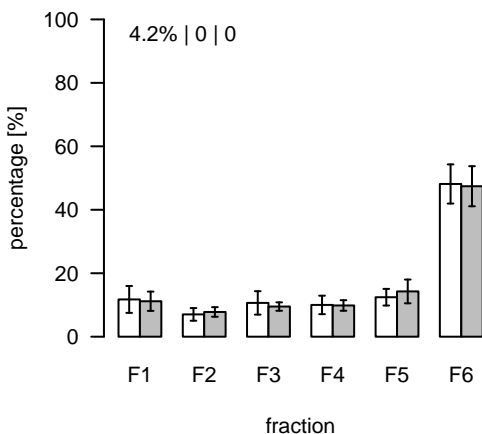

**L1640 (m/z=901.52216; rt=8.62753)**  
T/S Cluster: L-8.6-6

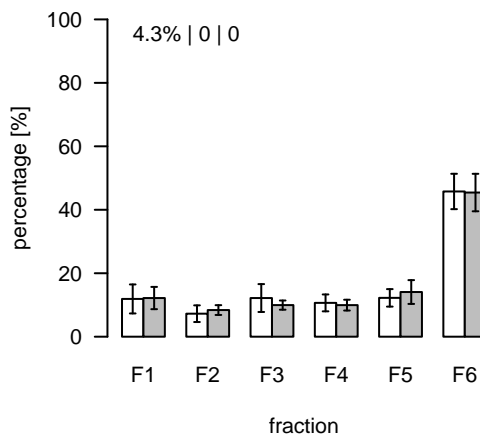

**L1638 (m/z=552.499971; rt=8.61582)**  
T/S Cluster: L-8.6-7

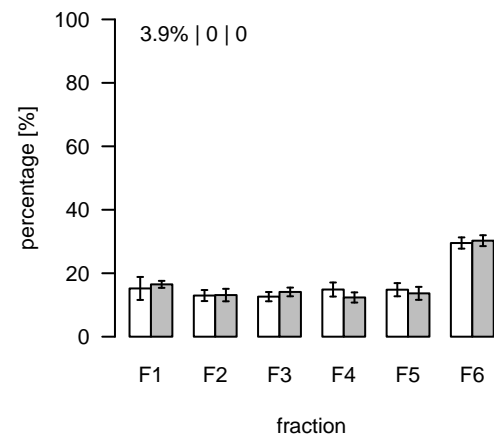

**L1645 (m/z=939.608755; rt=8.63608)**  
T/S Cluster: L-8.6-8

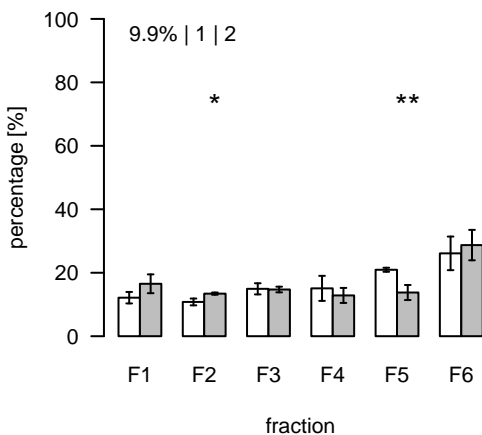

**L1646 (m/z=940.611341; rt=8.63636)**  
T/S Cluster: L-8.6-8

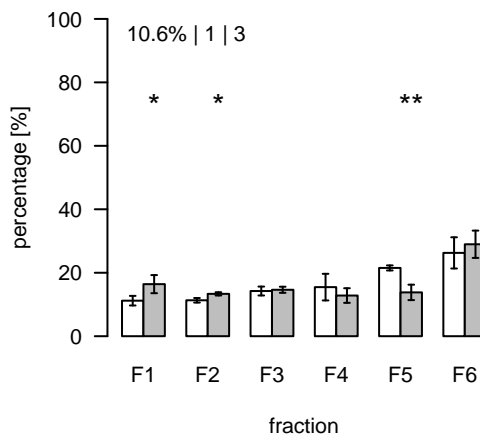

**L1649 (m/z=939.567561; rt=8.64015)**  
T/S Cluster: L-8.6-8

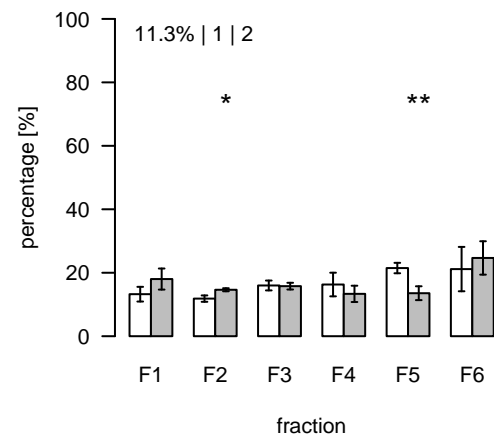

**L1647 (m/z=940.573869; rt=8.63783)**  
T/S Cluster: L-8.6-8

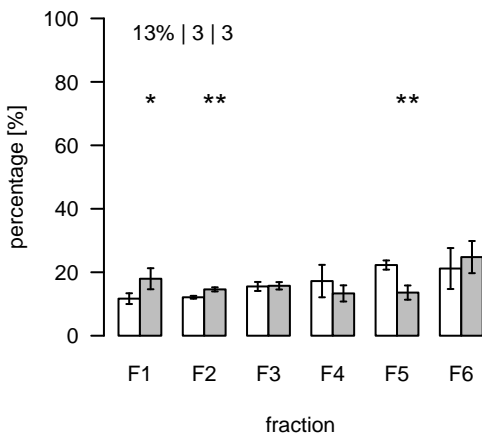

**L1644 (m/z=941.606412; rt=8.63345)**  
T/S Cluster: L-8.6-8

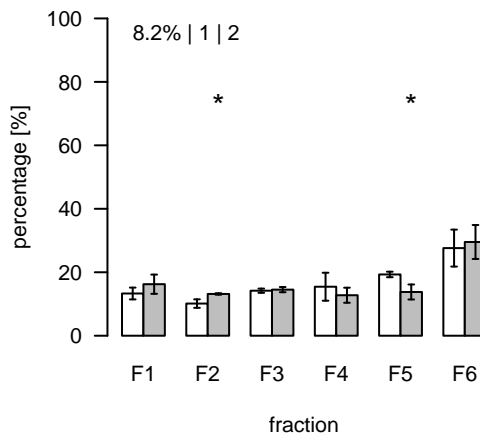

**L1642 (m/z=941.573692; rt=8.63025)**  
T/S Cluster: L-8.6-8

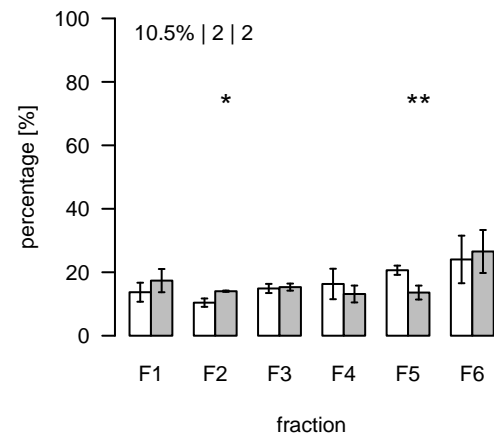

**L1643 (m/z=926.544395; rt=8.63322)**  
T/S Cluster: L-8.6-9

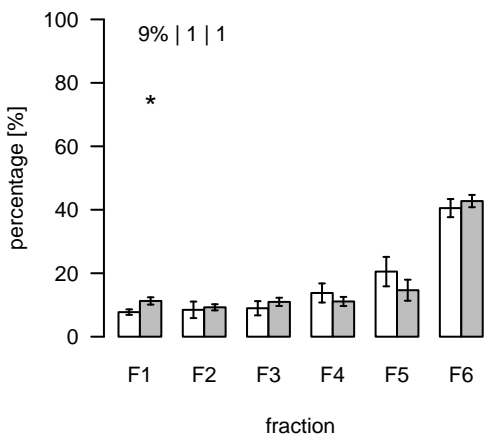

**L1663 (m/z=925.53108; rt=8.68542)**  
T/S Cluster: L-8.7-1

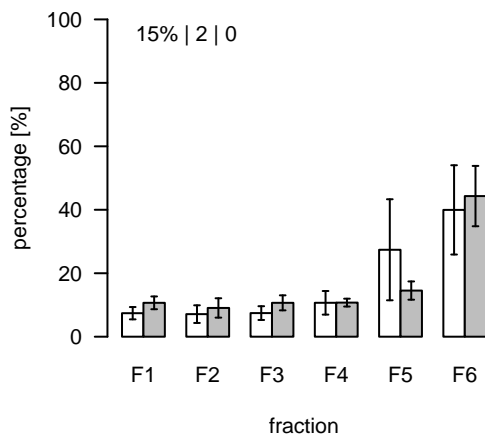

**L1662 (m/z=926.509583; rt=8.65451)**  
T/S Cluster: L-8.7-1

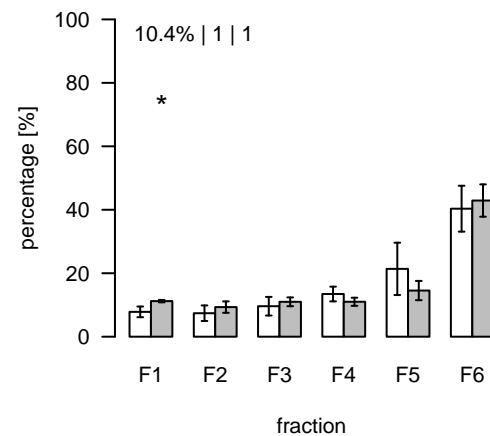

**L1670 (m/z=925.493128; rt=8.70484)**  
T/S Cluster: L-8.7-1

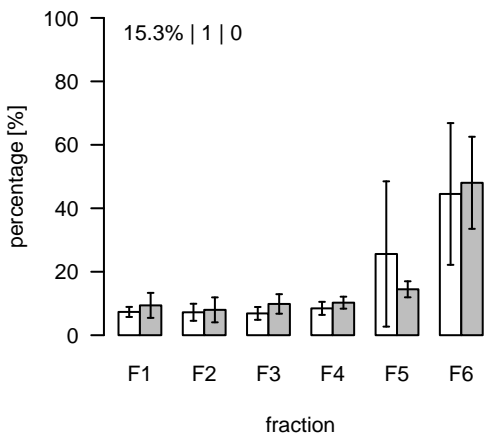

**L1664 (m/z=388.344284; rt=8.68742)**  
T/S Cluster: L-8.7-2

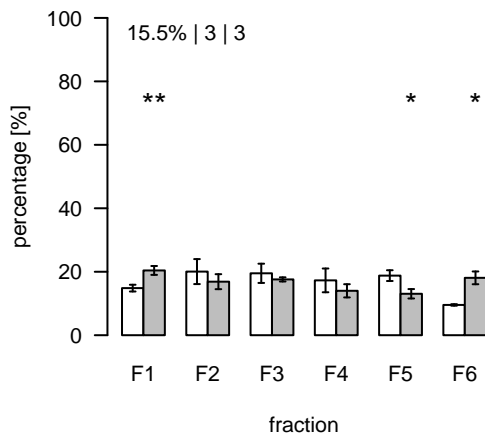

**L1665 (m/z=391.286526; rt=8.6978)**  
T/S Cluster: L-8.7-3

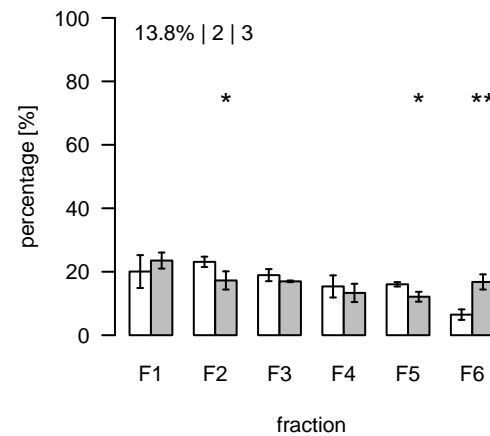

**L1669 (m/z=780.559092; rt=8.70482)**  
T/S Cluster: L-8.7-4

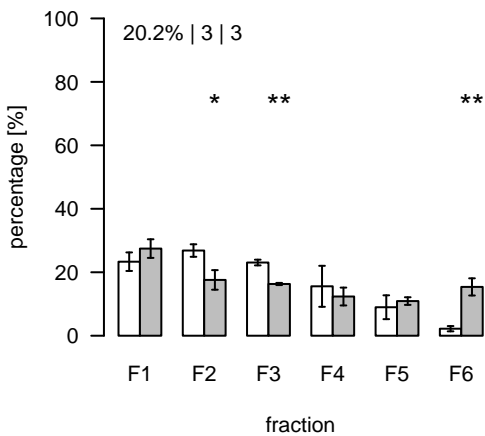

**L1671 (m/z=780.535129; rt=8.70509)**  
T/S Cluster: L-8.7-4

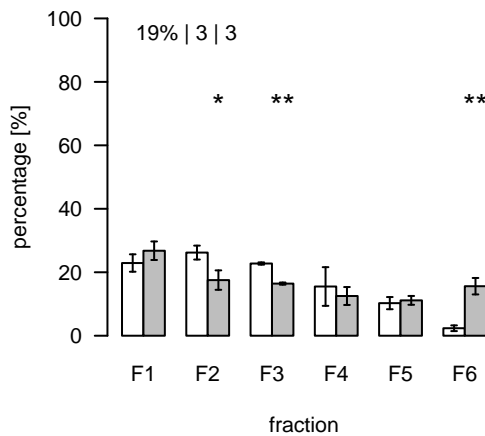

**L1667 (m/z=781.562978; rt=8.70439)**  
T/S Cluster: L-8.7-4

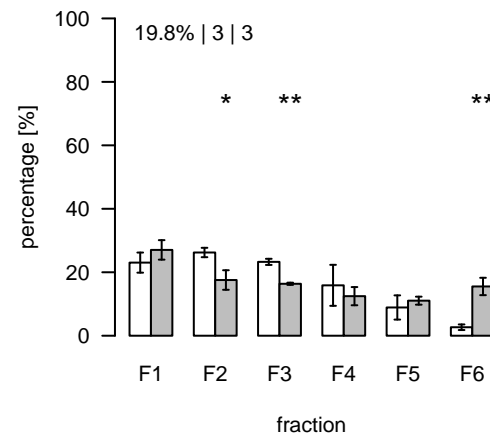



**L1668 (m/z=781.539966; rt=8.70457)**  
T/S Cluster: L-8.7-4

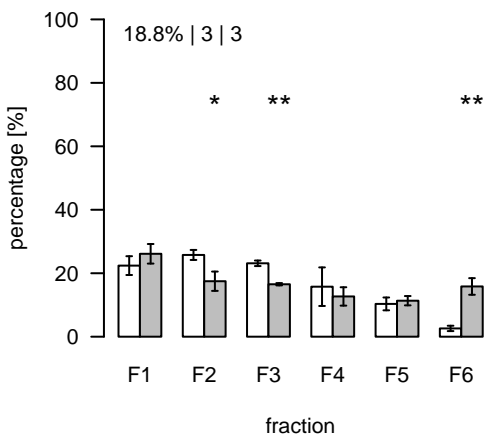

**L1666 (m/z=796.554206; rt=8.69979)**  
T/S Cluster: L-8.7-4

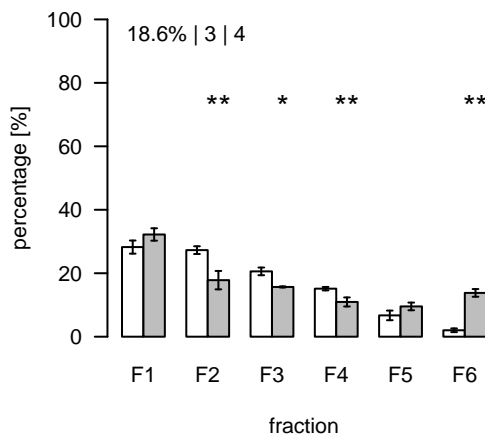

**L1690 (m/z=758.572754; rt=8.70703)**  
T/S Cluster: L-8.7-5

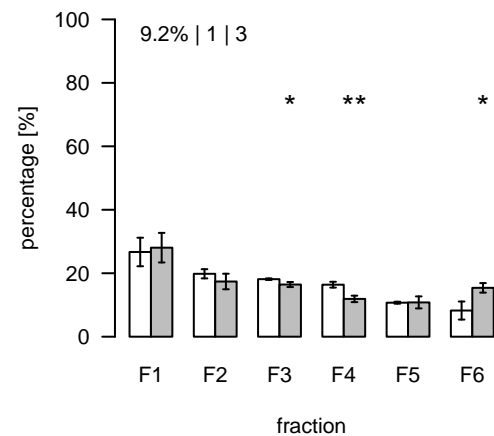

**L1685 (m/z=759.576558; rt=8.70689)**  
T/S Cluster: L-8.7-5

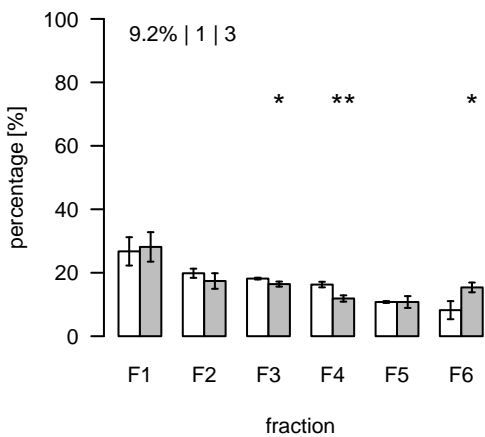

**L1695 (m/z=379.287508; rt=8.70714)**  
T/S Cluster: L-8.7-5

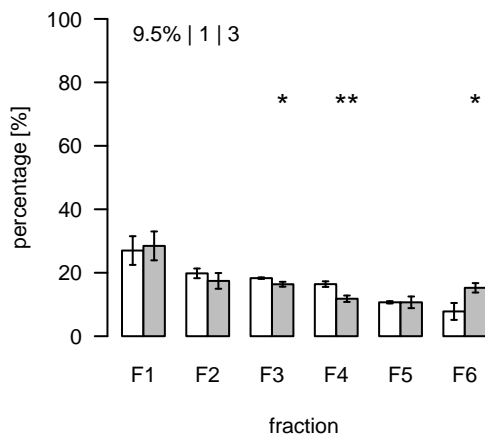

**L1691 (m/z=759.536817; rt=8.70704)**  
T/S Cluster: L-8.7-5

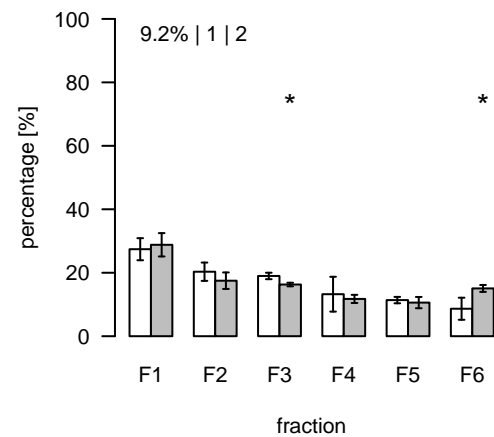

**L1684 (m/z=760.582838; rt=8.70685)**  
T/S Cluster: L-8.7-5

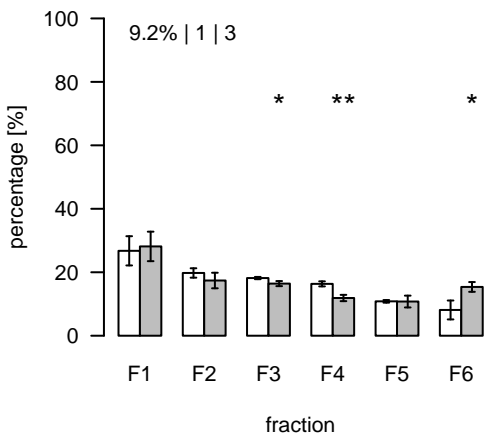

**L1686 (m/z=379.789476; rt=8.7069)**  
T/S Cluster: L-8.7-5

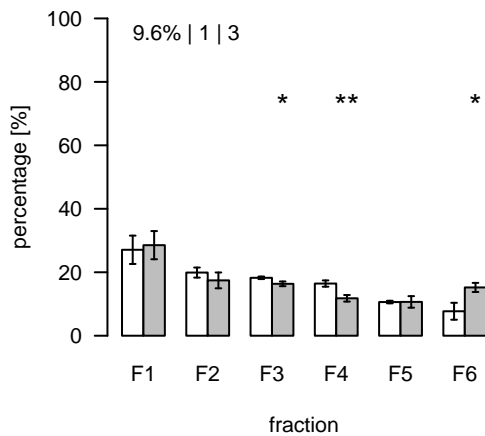

**L1694 (m/z=252.861237; rt=8.70709)**  
T/S Cluster: L-8.7-5

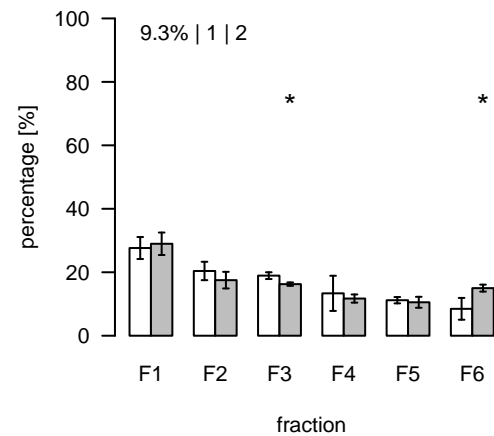

**L1693 (m/z=760.545029; rt=8.70707)**  
T/S Cluster: L-8.7-5

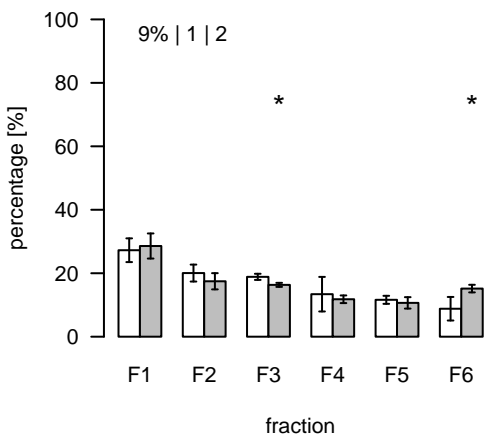

**L1677 (m/z=761.58482; rt=8.70664)**  
T/S Cluster: L-8.7-5

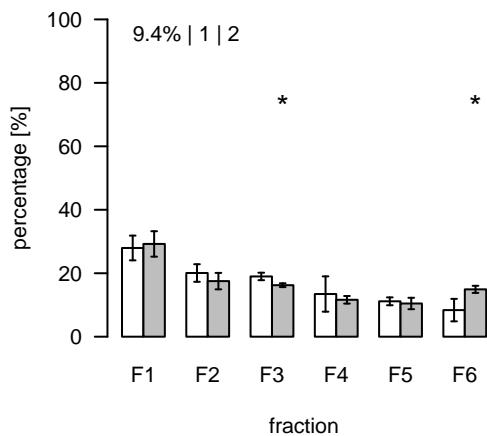

**L1688 (m/z=253.196352; rt=8.70695)**  
T/S Cluster: L-8.7-5

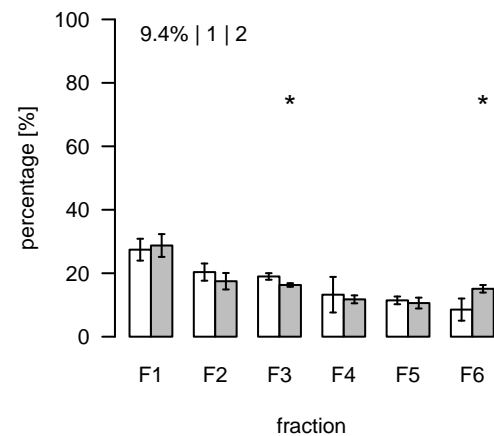

**L1682 (m/z=380.293379; rt=8.70679)**  
T/S Cluster: L-8.7-5

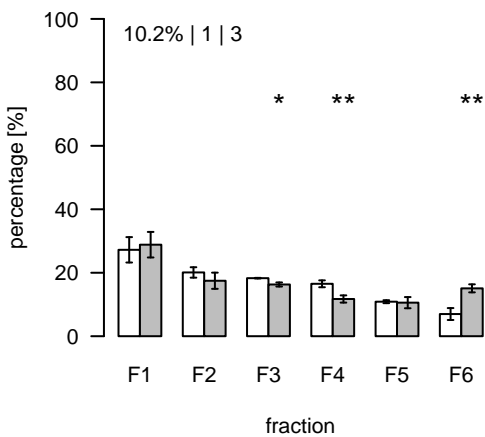

**L1692 (m/z=380.287553; rt=8.70704)**  
T/S Cluster: L-8.7-5

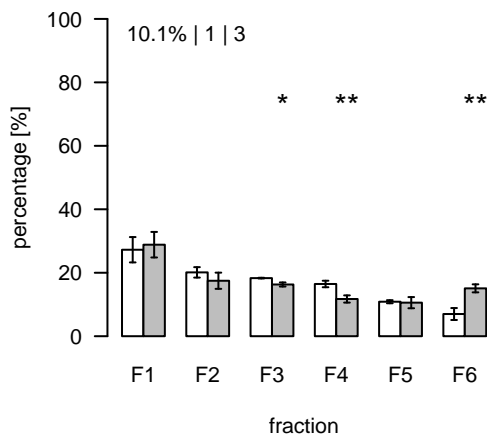

**L1687 (m/z=761.556019; rt=8.70695)**  
T/S Cluster: L-8.7-5

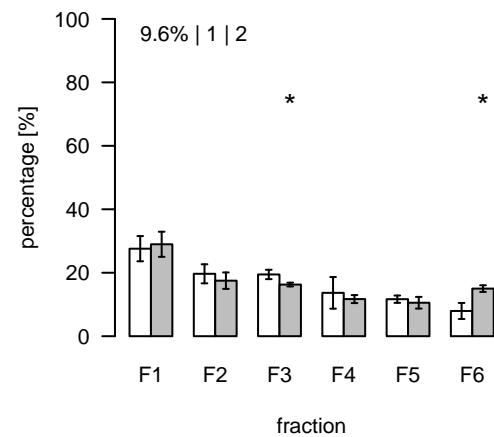

**L1702 (m/z=379.272252; rt=8.70804)**  
T/S Cluster: L-8.7-5

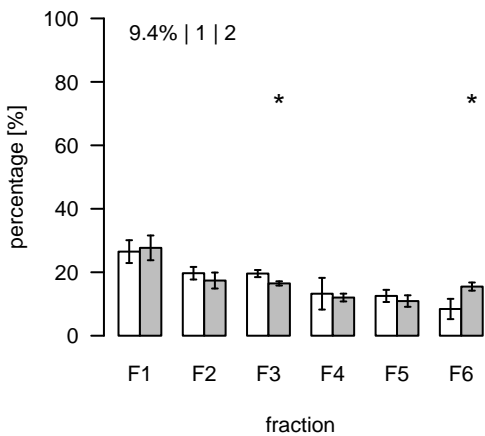

**L1701 (m/z=252.854767; rt=8.70788)**  
T/S Cluster: L-8.7-5

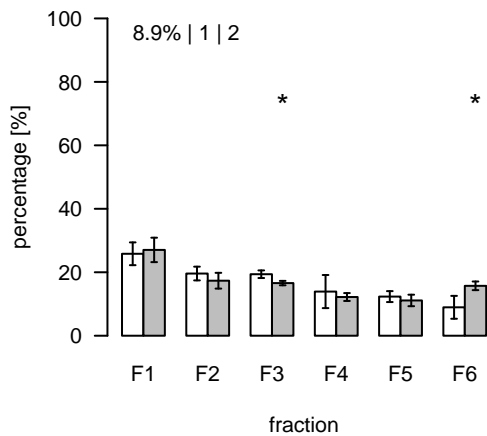

**L1675 (m/z=253.200643; rt=8.70638)**  
T/S Cluster: L-8.7-5

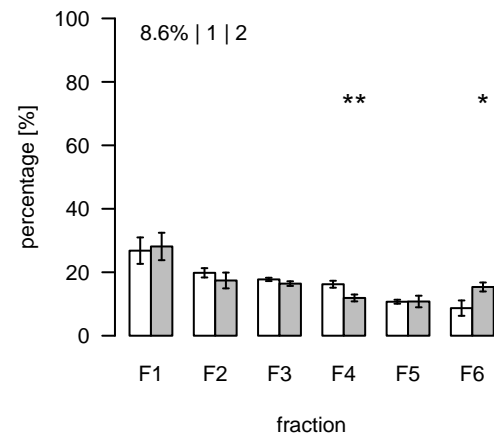

**L1689 (m/z=379.774712; rt=8.70702)**  
T/S Cluster: L-8.7-5

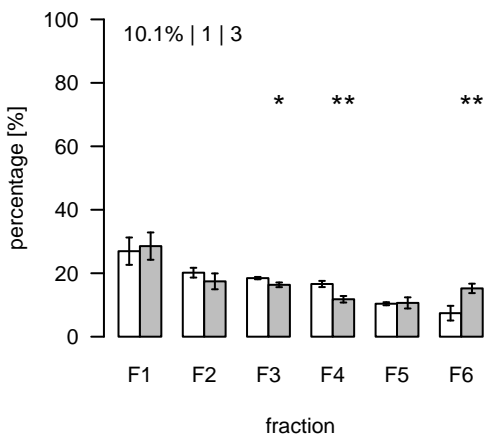

**L1699 (m/z=189.643296; rt=8.70758)**  
T/S Cluster: L-8.7-5

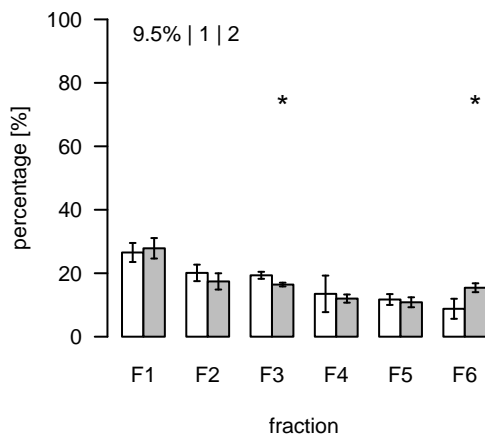

**L1676 (m/z=760.633521; rt=8.70643)**  
T/S Cluster: L-8.7-5

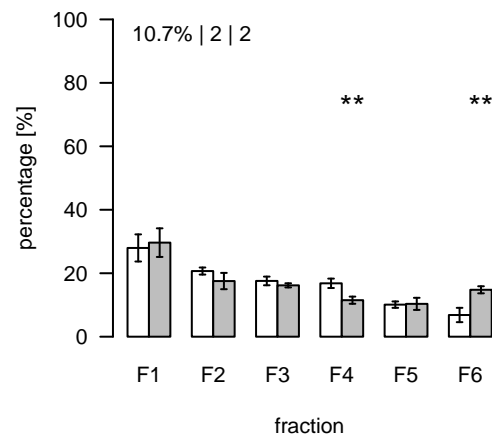

**L1697 (m/z=253.189613; rt=8.70724)**  
T/S Cluster: L-8.7-5

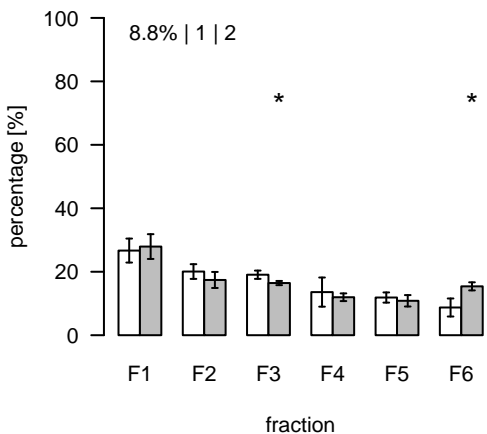

**L1681 (m/z=253.530561; rt=8.70678)**  
T/S Cluster: L-8.7-5

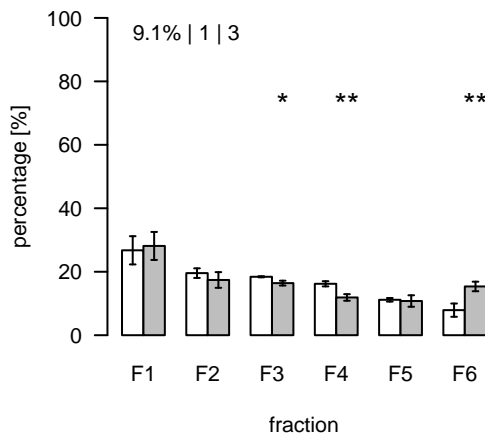

**L1678 (m/z=189.646397; rt=8.70672)**  
T/S Cluster: L-8.7-5

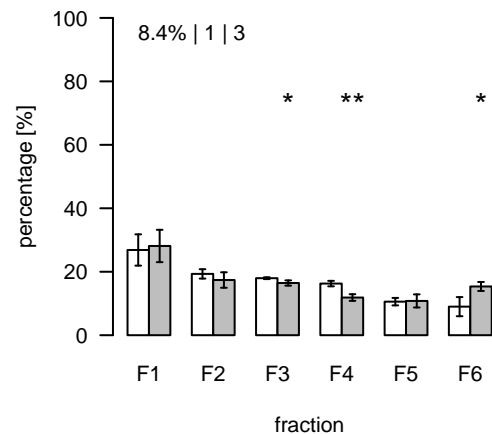

**L1673 (m/z=762.58699; rt=8.7062)**  
T/S Cluster: L-8.7-5

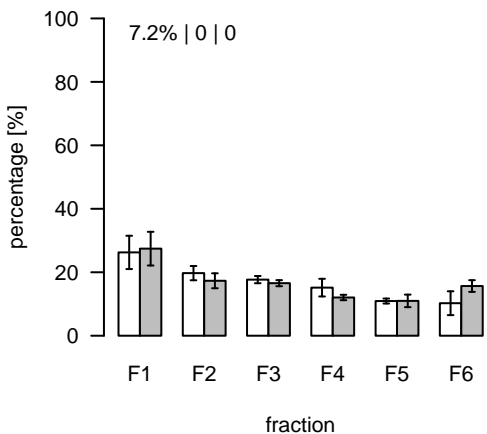

**L1698 (m/z=151.715705; rt=8.70729)**  
T/S Cluster: L-8.7-5

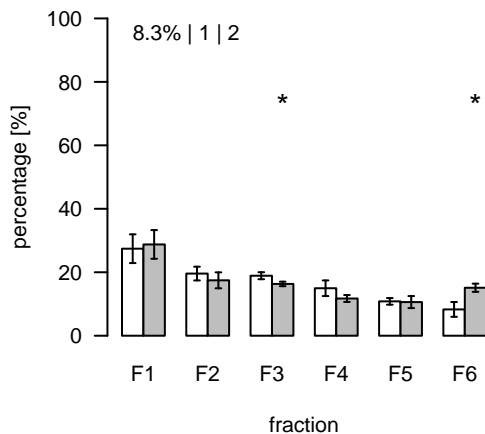

**L1680 (m/z=151.716539; rt=8.70678)**  
T/S Cluster: L-8.7-5

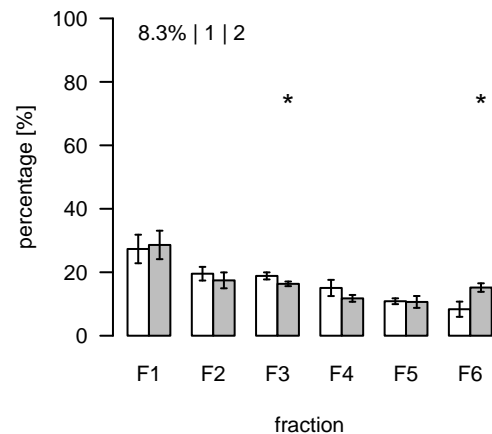

**L1679 (m/z=380.791609; rt=8.70676)**  
T/S Cluster: L-8.7-5

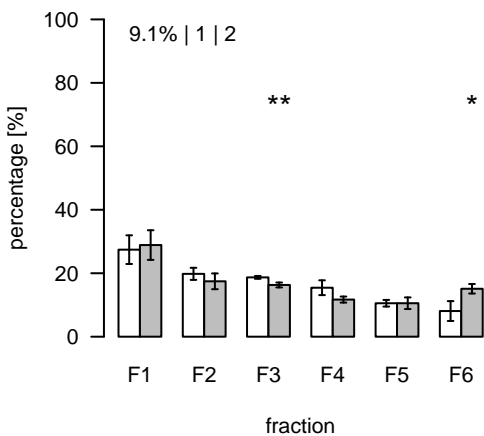

**L1672 (m/z=380.796789; rt=8.70611)**  
T/S Cluster: L-8.7-5

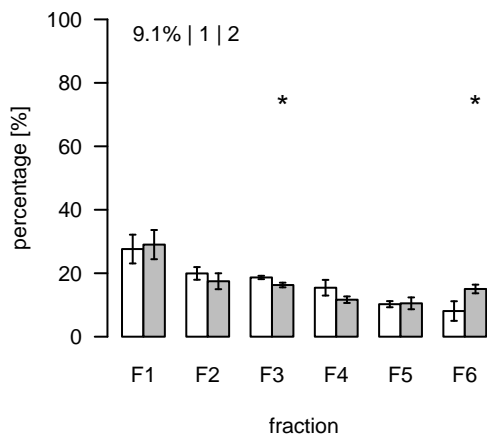

**L1696 (m/z=253.526672; rt=8.70714)**  
T/S Cluster: L-8.7-5

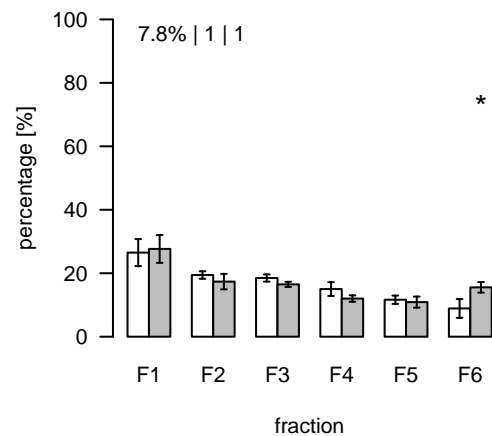

**L1683 (m/z=189.894143; rt=8.70683)**  
T/S Cluster: L-8.7-5

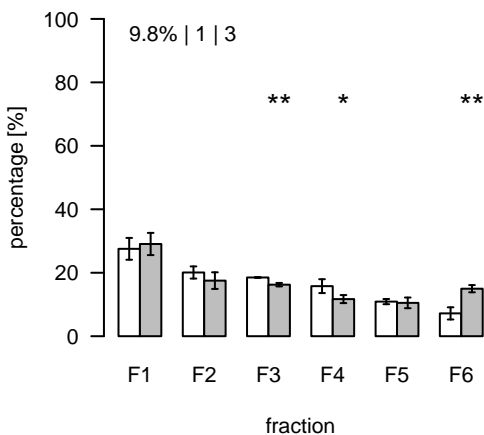

**L1674 (m/z=189.897278; rt=8.70635)**  
T/S Cluster: L-8.7-5

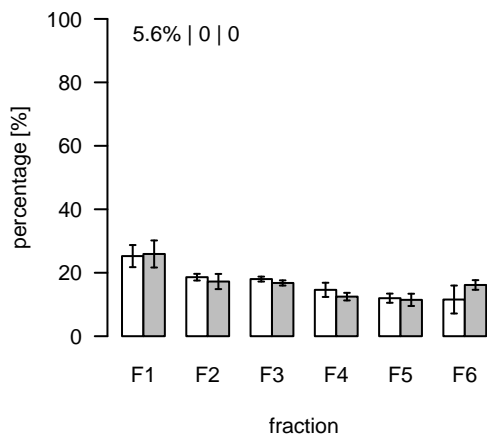

**L1713 (m/z=923.523967; rt=8.71078)**  
T/S Cluster: L-8.7-6

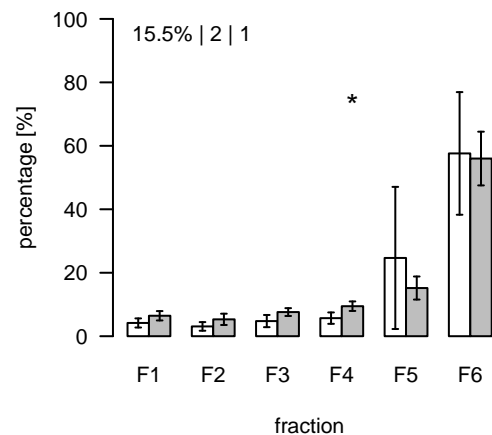

**L1719 (m/z=923.485054; rt=8.71613)**  
T/S Cluster: L-8.7-6

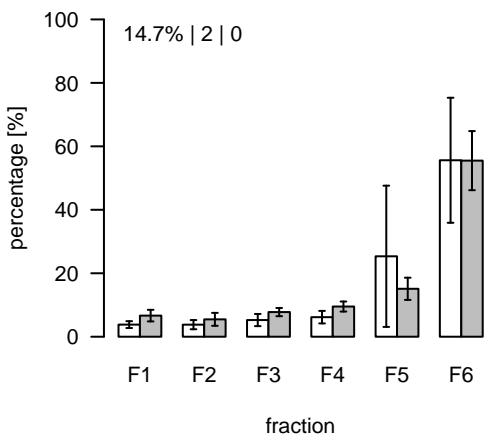

**L1712 (m/z=924.525468; rt=8.71036)**  
T/S Cluster: L-8.7-6

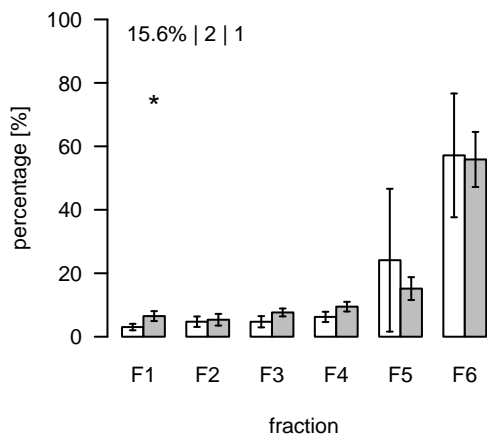

**L1718 (m/z=924.478593; rt=8.71531)**  
T/S Cluster: L-8.7-6

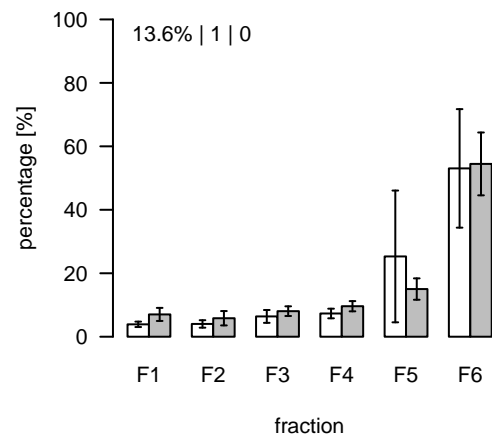

**L1700 (m/z=905.512129; rt=8.70763)**  
T/S Cluster: L-8.7-6

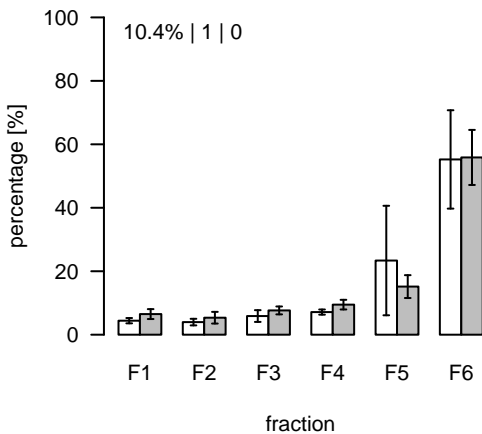

**L1707 (m/z=770.583683; rt=8.70883)**  
T/S Cluster: L-8.7-7

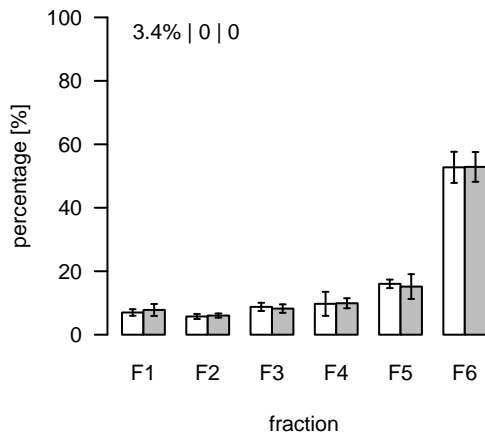

**L1710 (m/z=770.555341; rt=8.70951)**  
T/S Cluster: L-8.7-7

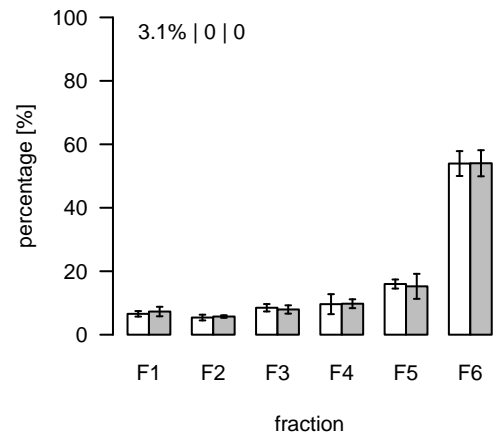

**L1706 (m/z=771.586395; rt=8.70873)**  
T/S Cluster: L-8.7-7

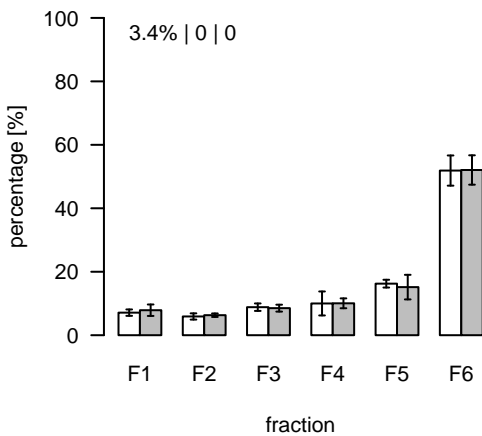

**L1709 (m/z=771.563063; rt=8.70932)**  
T/S Cluster: L-8.7-7

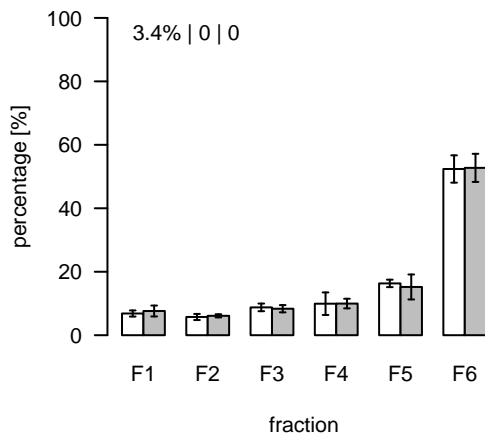

**L1711 (m/z=771.549723; rt=8.70982)**  
T/S Cluster: L-8.7-7

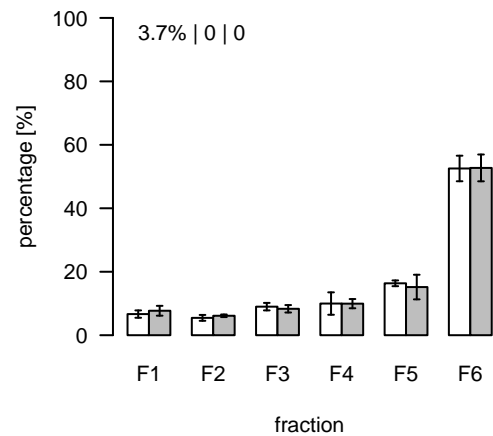

**L1703 (m/z=772.589842; rt=8.70818)**  
T/S Cluster: L-8.7-7

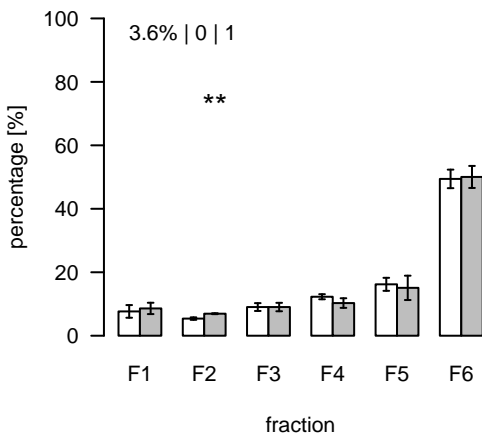

**L1704 (m/z=772.572635; rt=8.70843)**  
T/S Cluster: L-8.7-7

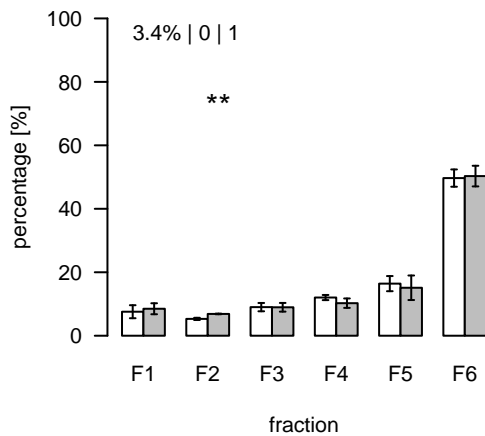

**L1705 (m/z=385.294627; rt=8.70872)**  
T/S Cluster: L-8.7-7

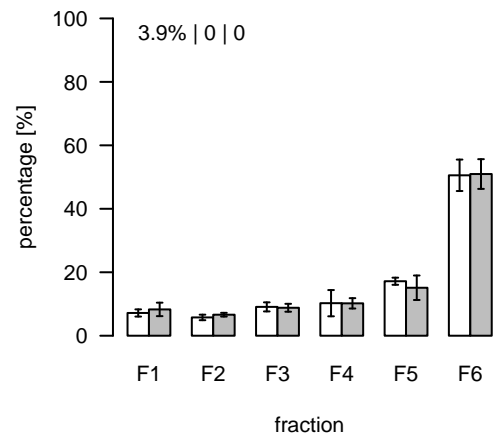

**L1708 (m/z=385.289243; rt=8.7093)**  
T/S Cluster: L-8.7-7

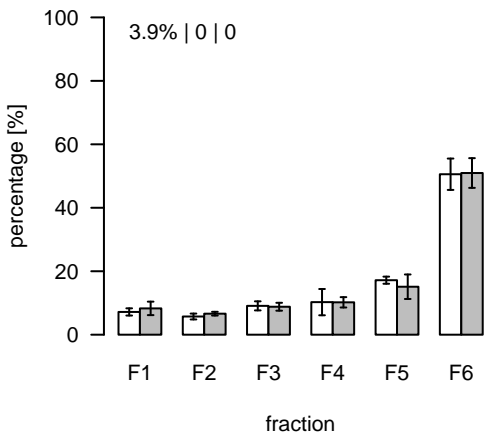

**L1730 (m/z=895.529644; rt=8.74288)**  
T/S Cluster: L-8.7-8

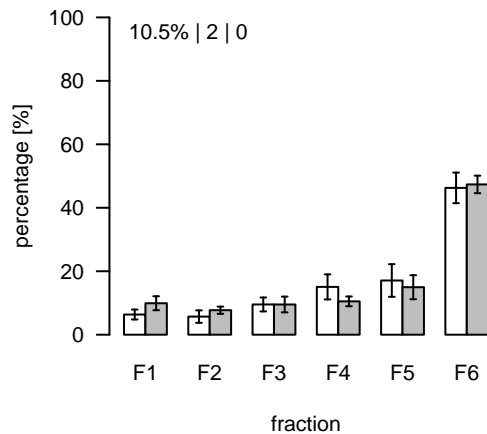

**L1729 (m/z=896.531541; rt=8.7428)**  
T/S Cluster: L-8.7-8

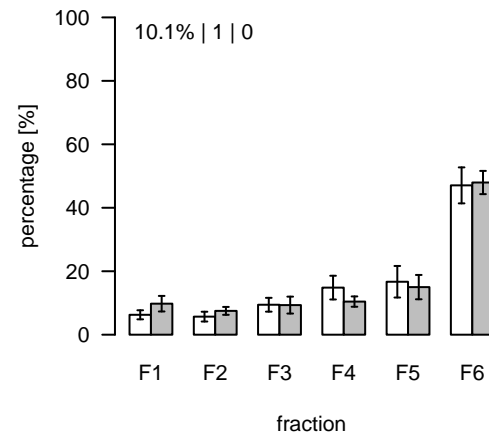

**L1734 (m/z=895.495819; rt=8.7439)**  
T/S Cluster: L-8.7-8

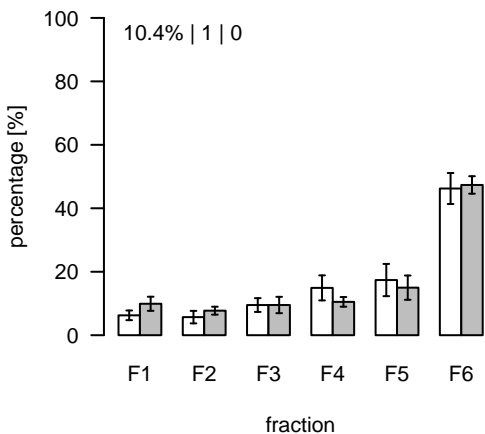

**L1728 (m/z=897.533331; rt=8.74272)**  
T/S Cluster: L-8.7-8

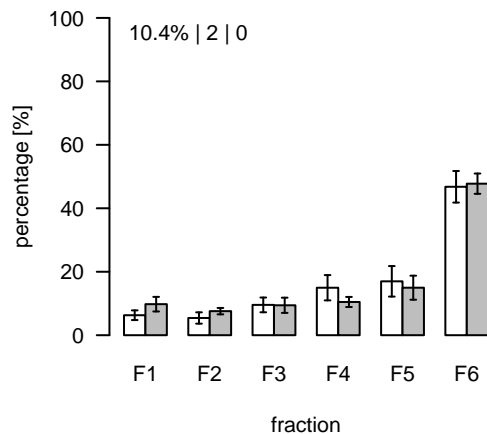

**L1736 (m/z=896.489246; rt=8.744)**  
T/S Cluster: L-8.7-8

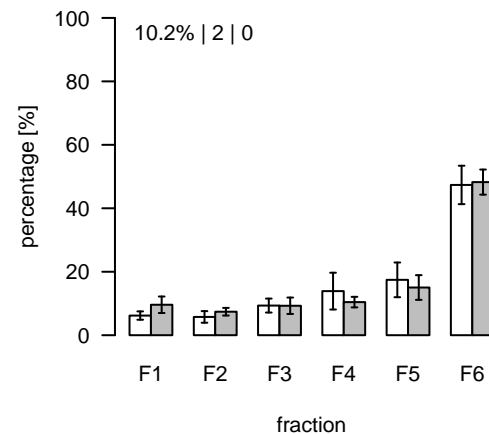

**L1732 (m/z=897.501775; rt=8.7436)**  
T/S Cluster: L-8.7-8

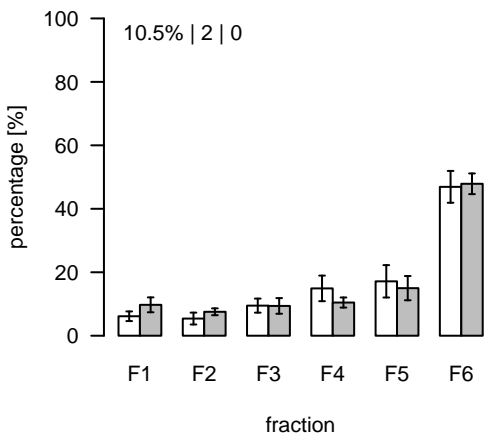

**L1715 (m/z=775.529536; rt=8.71203)**  
T/S Cluster: L-8.7-8

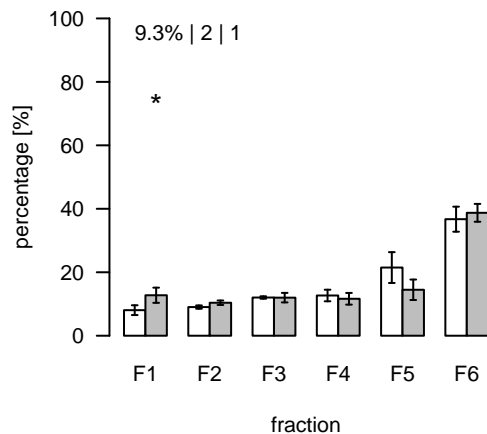

**L1714 (m/z=775.547152; rt=8.71132)**  
T/S Cluster: L-8.7-8

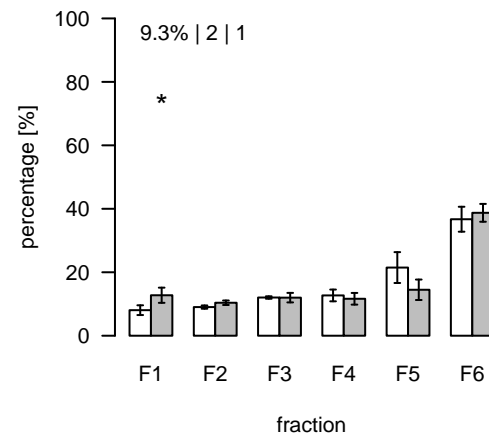

**L1731 (m/z=898.533268; rt=8.74315)**  
T/S Cluster: L-8.7-8

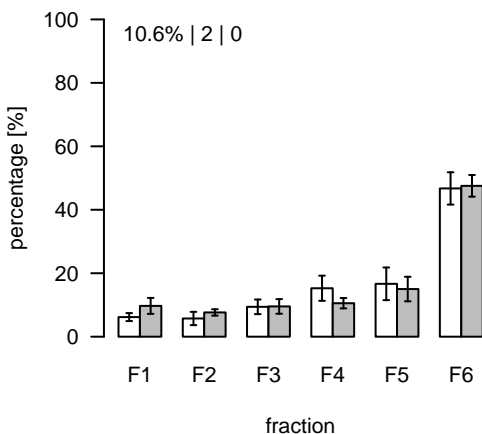

**L1720 (m/z=909.547727; rt=8.72448)**  
T/S Cluster: L-8.7-8

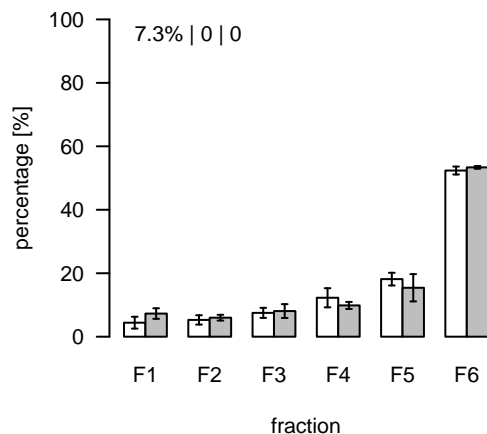

**L1727 (m/z=447.769963; rt=8.74258)**  
T/S Cluster: L-8.7-8

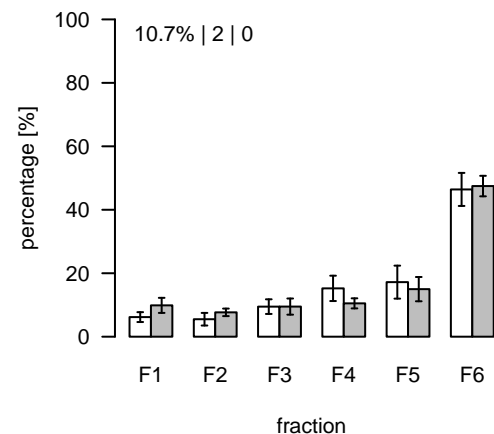

**L1735 (m/z=447.762473; rt=8.74397)**  
T/S Cluster: L-8.7-8

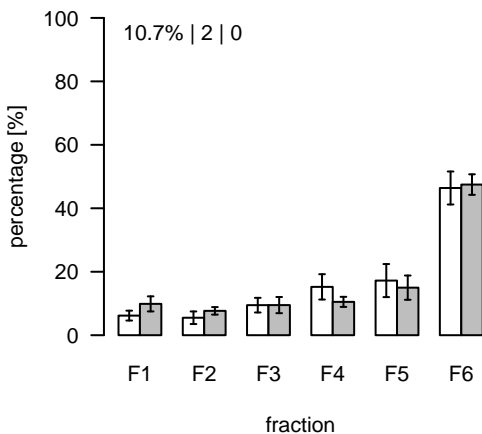

**L1721 (m/z=910.550989; rt=8.72509)**  
T/S Cluster: L-8.7-8

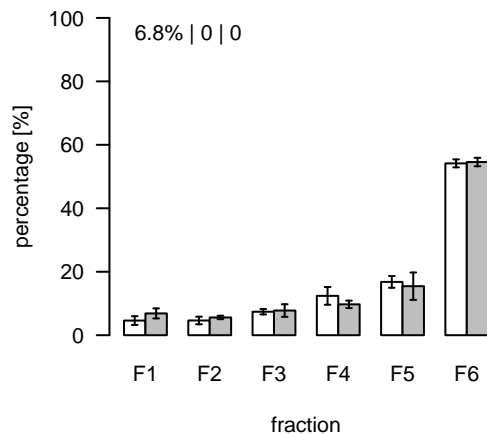

**L1722 (m/z=910.549806; rt=8.7251)**  
T/S Cluster: L-8.7-8

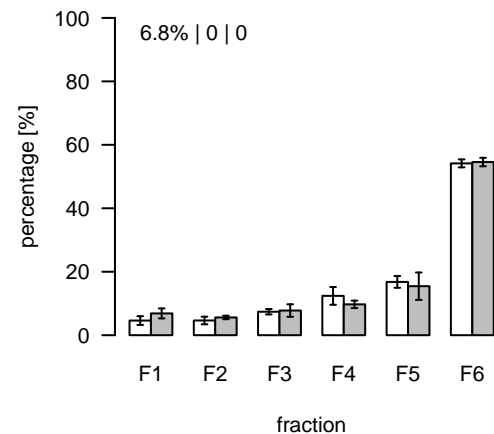

**L1726 (m/z=448.270796; rt=8.74256)**  
T/S Cluster: L-8.7-8

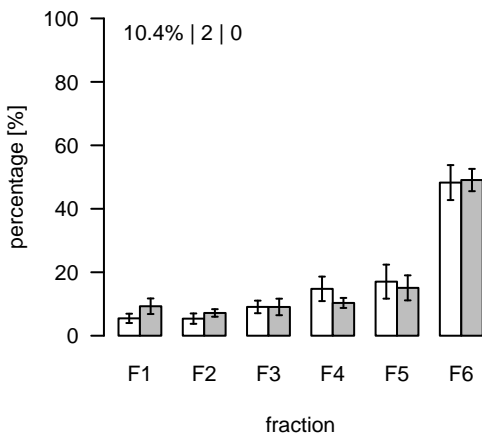

**L1733 (m/z=448.26375; rt=8.74374)**  
T/S Cluster: L-8.7-8

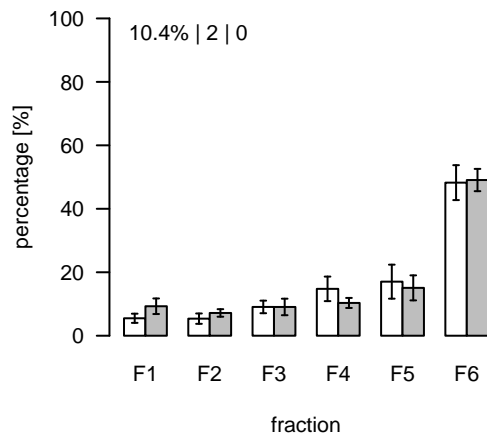

**L1737 (m/z=898.500387; rt=8.74419)**  
T/S Cluster: L-8.7-8

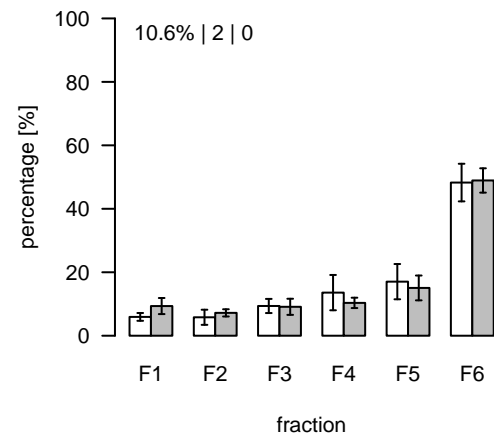

**L1724 (m/z=911.551682; rt=8.72635)**  
T/S Cluster: L-8.7-8

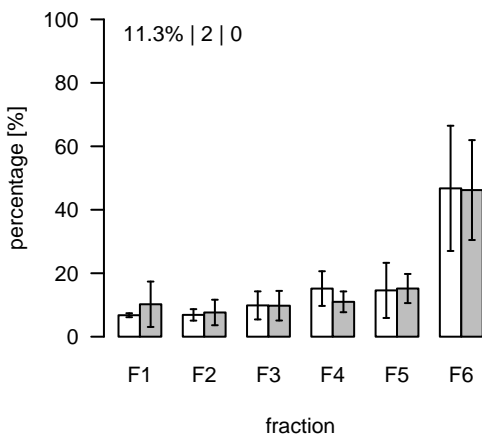

**L1725 (m/z=911.550475; rt=8.72636)**  
T/S Cluster: L-8.7-8

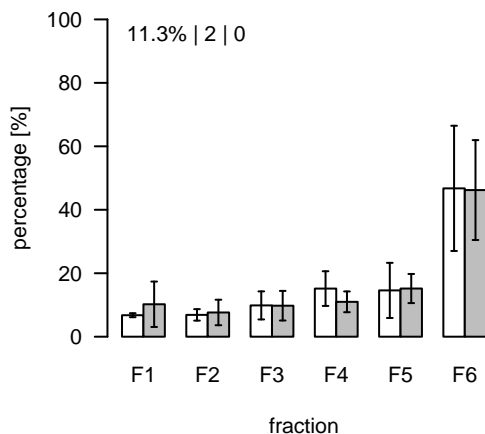

**L1723 (m/z=909.482986; rt=8.72532)**  
T/S Cluster: L-8.7-8

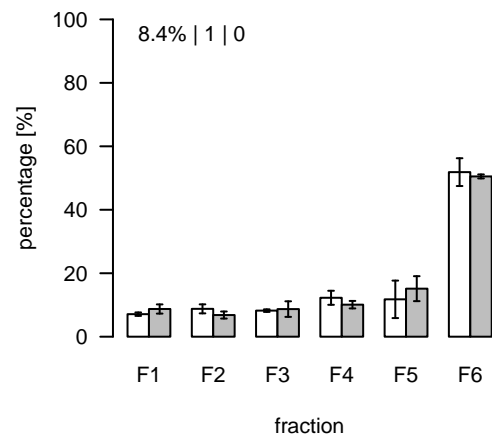

**L1717 (m/z=796.533432; rt=8.71487)**  
T/S Cluster: L-8.7-9

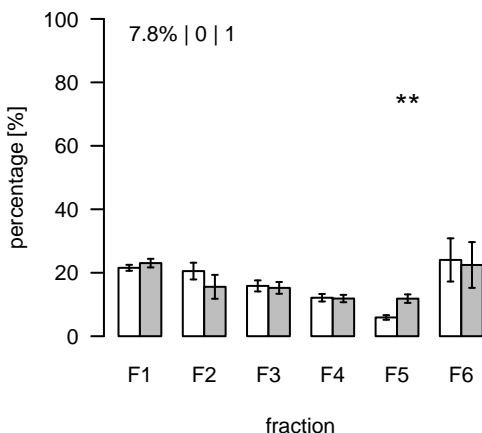

**L1716 (m/z=797.53683; rt=8.7134)**  
T/S Cluster: L-8.7-9

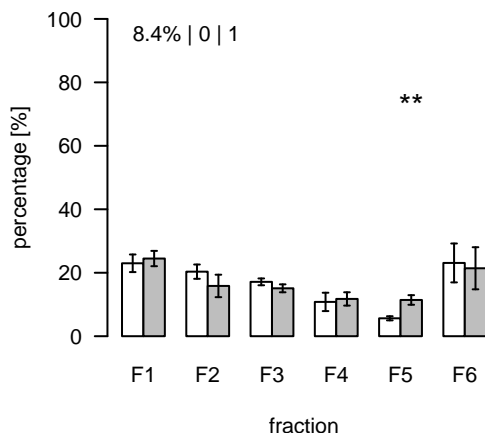

**L1738 (m/z=437.735177; rt=8.78422)**  
T/S Cluster: L-8.8-1

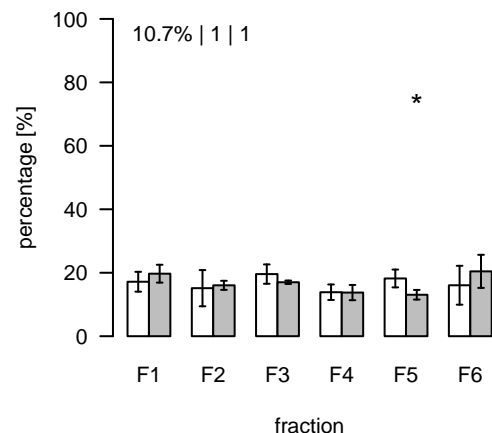

**L1741 (m/z=796.598695; rt=8.84689)**  
T/S Cluster: L-8.8-2

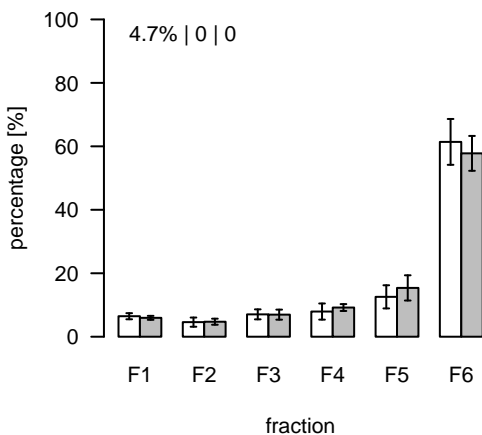

**L1740 (m/z=891.568987; rt=8.81159)**  
T/S Cluster: L-8.8-2

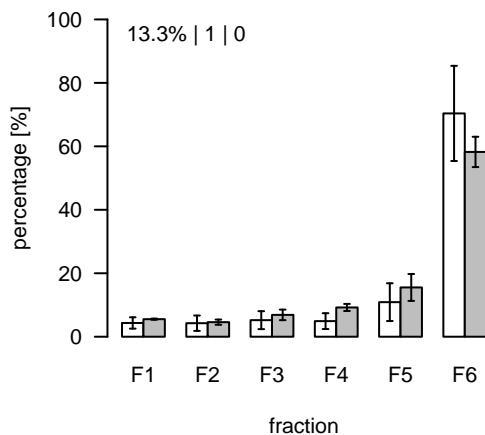

**L1739 (m/z=891.532698; rt=8.81155)**  
T/S Cluster: L-8.8-2

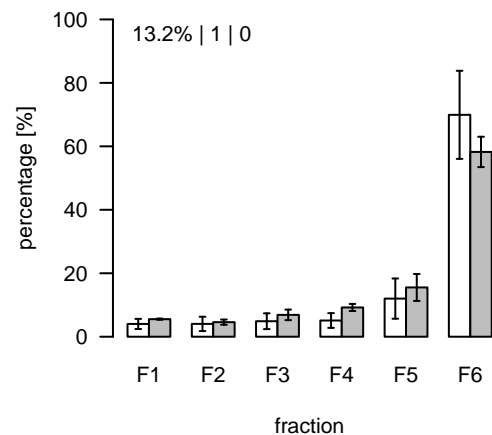



**L1742 (m/z=797.602325; rt=8.84813)**  
T/S Cluster: L-8.8-2

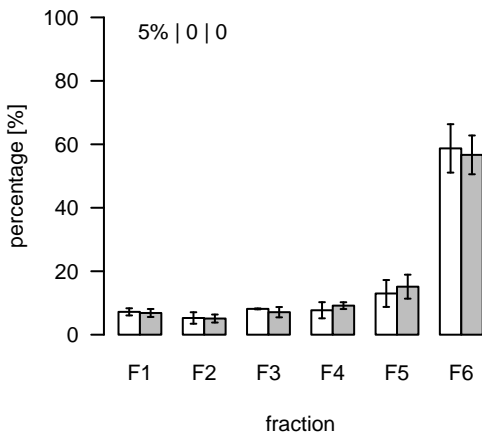

**L1750 (m/z=784.589414; rt=8.87984)**  
T/S Cluster: L-8.9-1

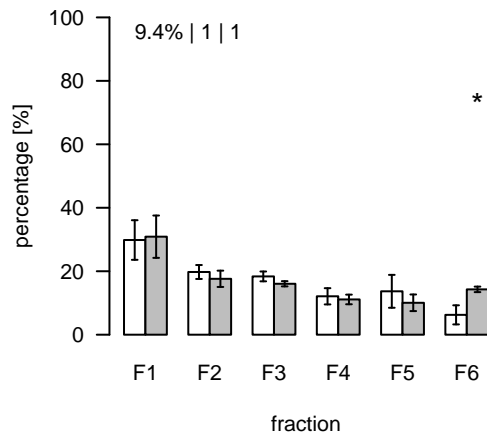

**L1746 (m/z=784.556693; rt=8.87911)**  
T/S Cluster: L-8.9-1

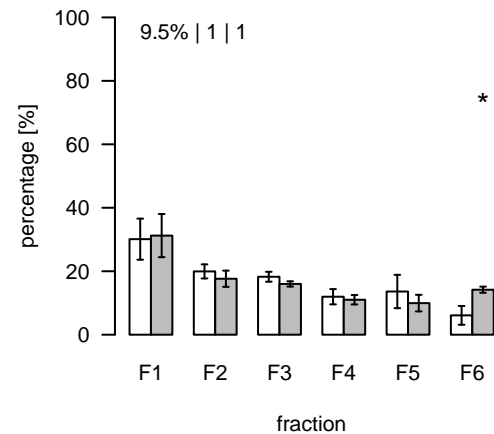

**L1749 (m/z=785.59314; rt=8.87981)**  
T/S Cluster: L-8.9-1

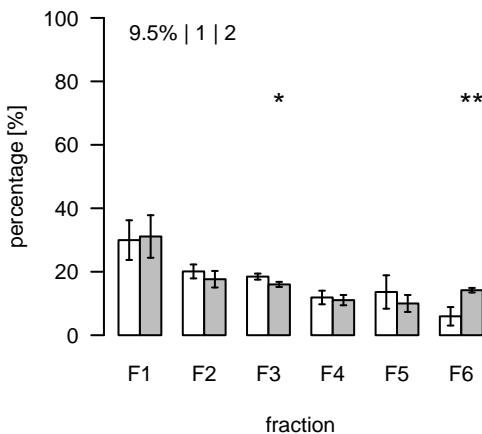

**L1786 (m/z=716.526954; rt=8.91709)**  
T/S Cluster: L-8.9-1

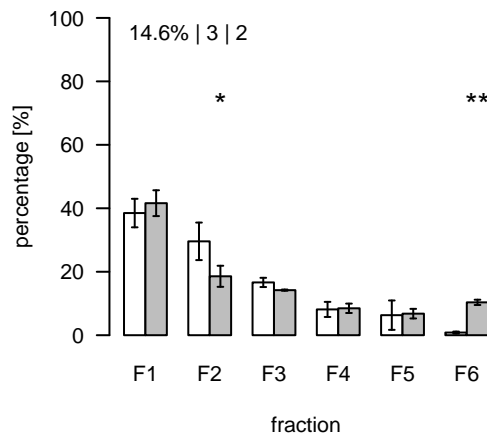

**L1747 (m/z=785.570953; rt=8.87923)**  
T/S Cluster: L-8.9-1

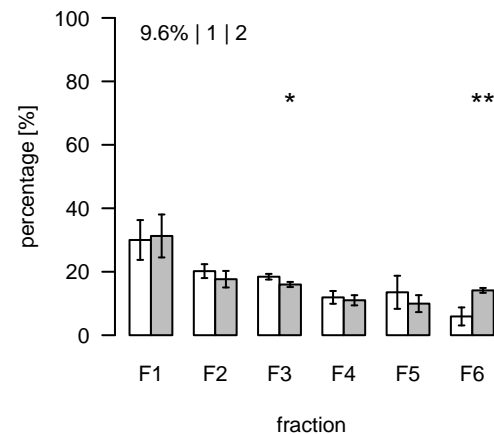

**L1787 (m/z=716.50476; rt=8.91733)**  
T/S Cluster: L-8.9-1

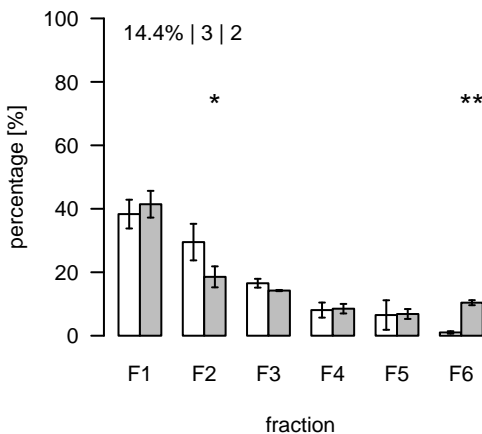

**L1748 (m/z=786.598216; rt=8.87933)**  
T/S Cluster: L-8.9-1

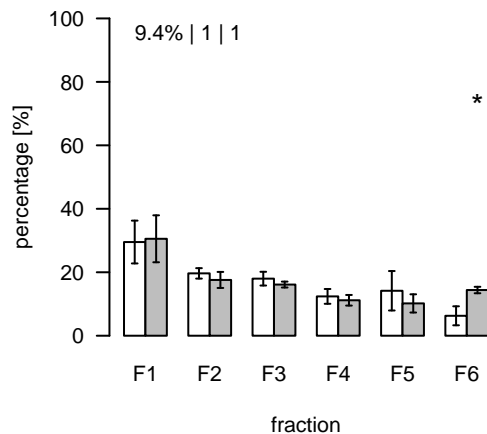

**L1744 (m/z=786.574017; rt=8.87884)**  
T/S Cluster: L-8.9-1

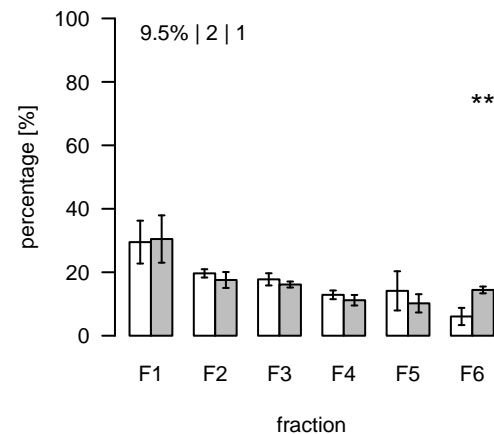

**L1752 (m/z=392.292908; rt=8.88001)**  
T/S Cluster: L-8.9-1

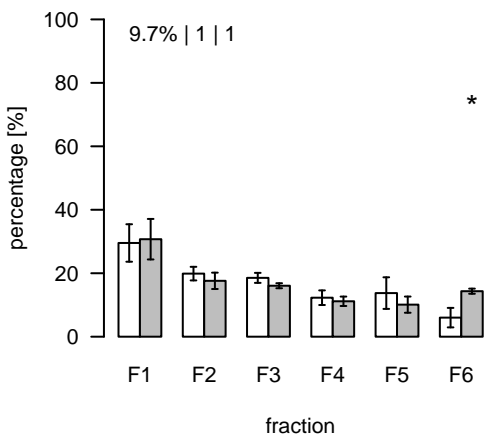

**L1755 (m/z=392.298973; rt=8.8805)**  
T/S Cluster: L-8.9-1

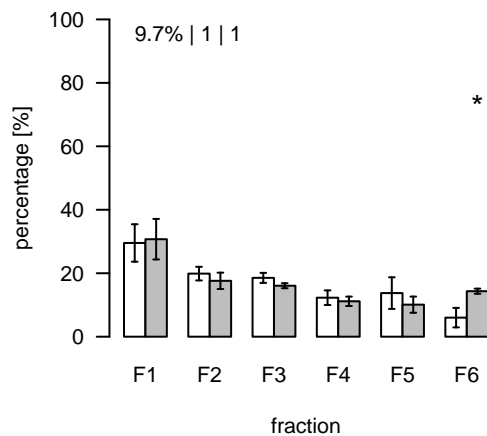

**L1751 (m/z=392.800056; rt=8.87991)**  
T/S Cluster: L-8.9-1

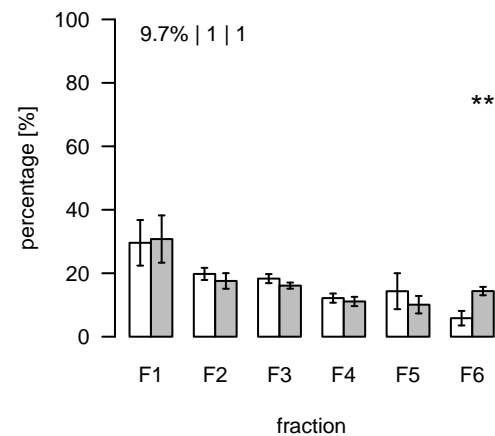

**L1745 (m/z=392.795674; rt=8.87911)**  
T/S Cluster: L-8.9-1

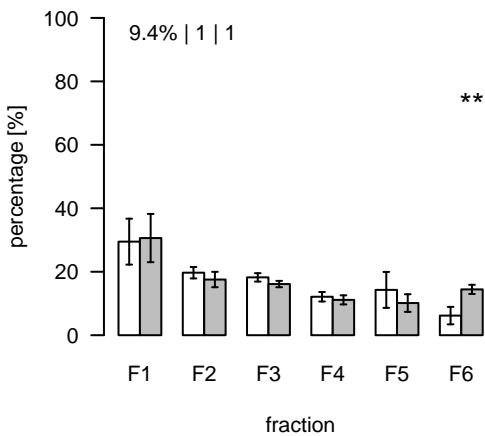

**L1753 (m/z=261.5334; rt=8.8801)**  
T/S Cluster: L-8.9-1

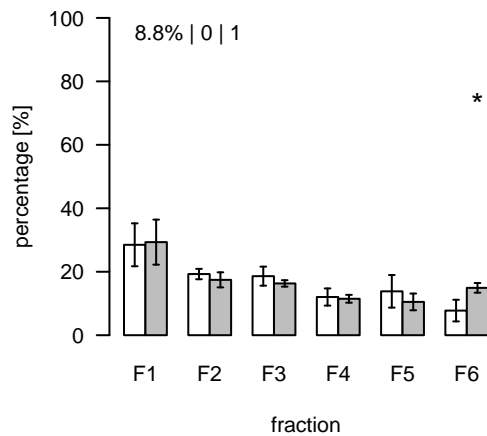

**L1754 (m/z=787.598693; rt=8.88016)**  
T/S Cluster: L-8.9-1

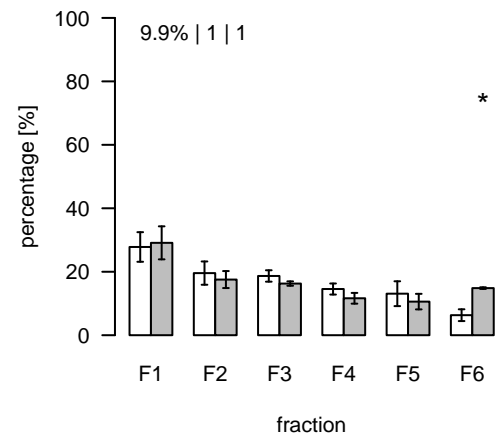

**L1743 (m/z=261.529498; rt=8.87753)**  
T/S Cluster: L-8.9-1

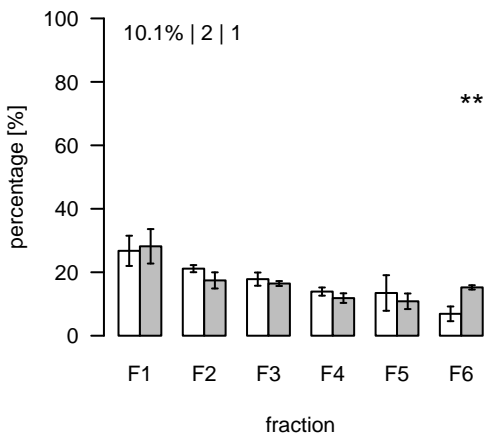

**L1756 (m/z=903.536891; rt=8.90188)**  
T/S Cluster: L-8.9-2

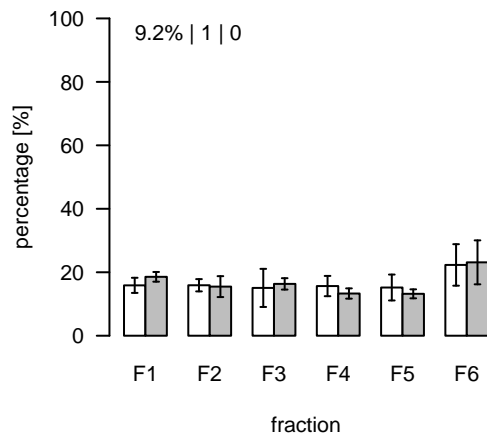

**L1757 (m/z=903.569061; rt=8.9024)**  
T/S Cluster: L-8.9-3

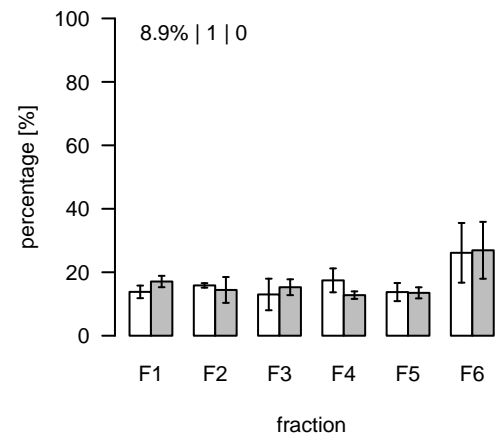

**L1759 (m/z=887.573742; rt=8.91291)**  
T/S Cluster: L-8.9-4

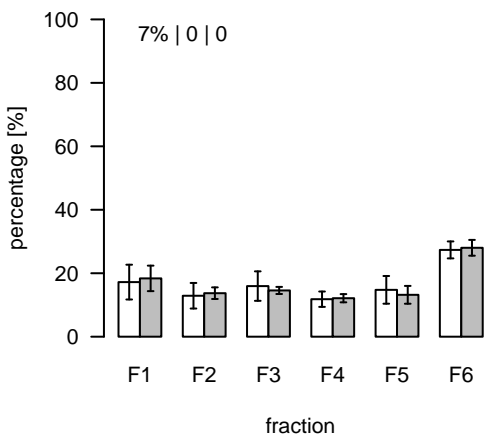

**L1758 (m/z=887.544901; rt=8.91255)**  
T/S Cluster: L-8.9-4

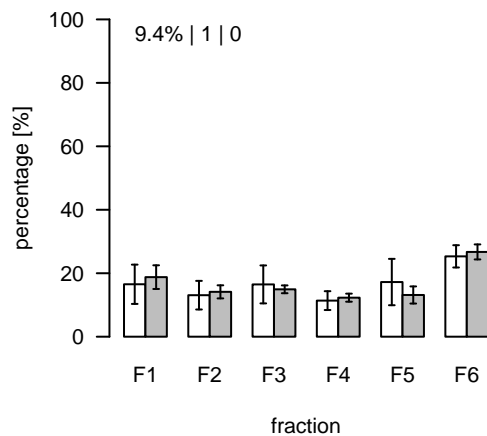

**L1760 (m/z=888.577083; rt=8.91329)**  
T/S Cluster: L-8.9-4

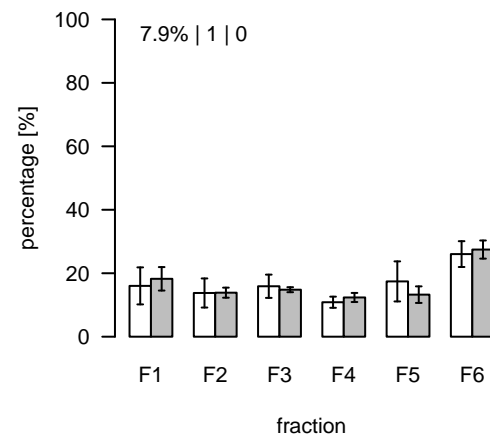

**L1788 (m/z=888.54002; rt=8.91741)**  
T/S Cluster: L-8.9-4

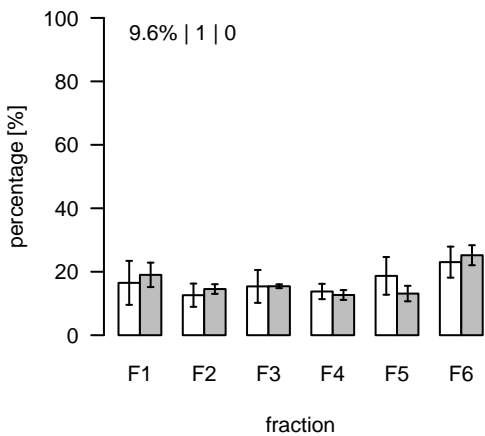

**L1777 (m/z=907.526048; rt=8.91505)**  
T/S Cluster: L-8.9-5

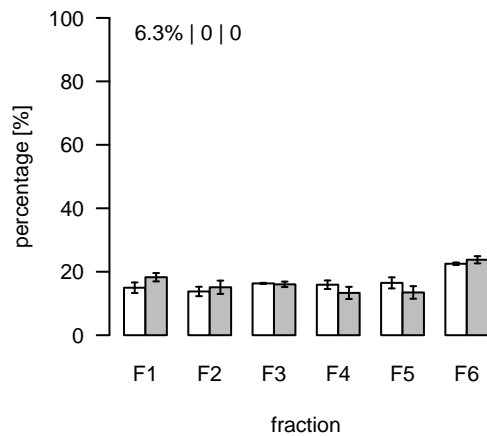

**L1768 (m/z=908.52917; rt=8.9148)**  
T/S Cluster: L-8.9-5

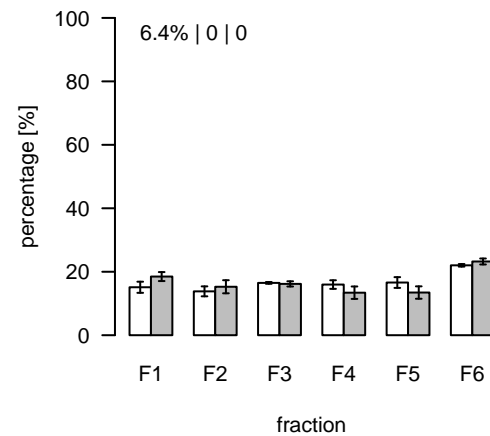

**L1783 (m/z=909.528911; rt=8.91609)**  
T/S Cluster: L-8.9-5

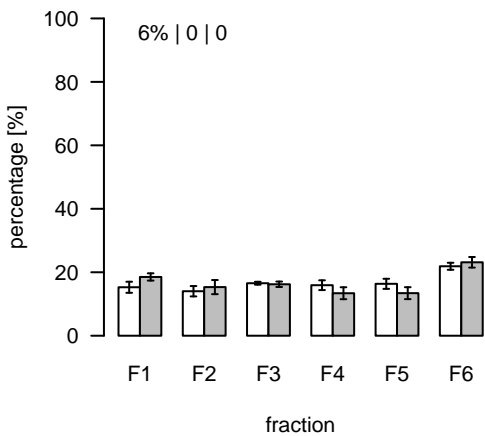

**L1779 (m/z=909.503706; rt=8.91523)**  
T/S Cluster: L-8.9-5

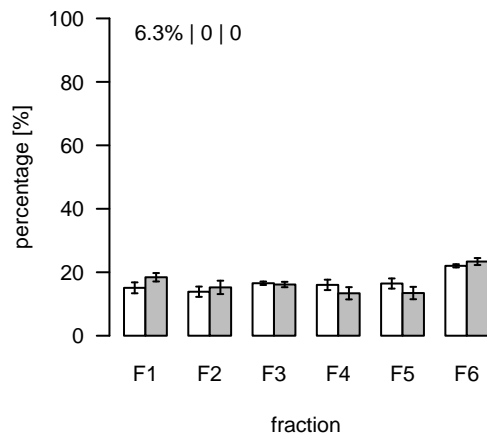

**L1780 (m/z=907.464676; rt=8.91527)**  
T/S Cluster: L-8.9-5

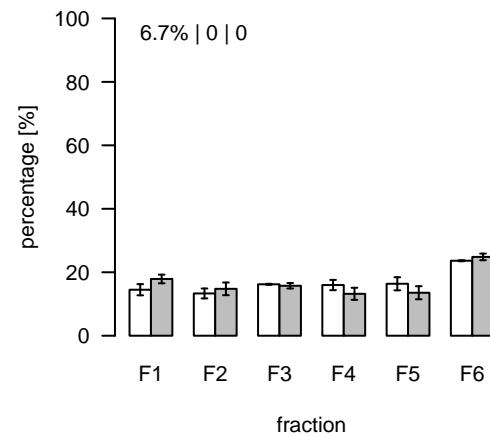

**L1778 (m/z=453.761839; rt=8.91517)**  
T/S Cluster: L-8.9-5

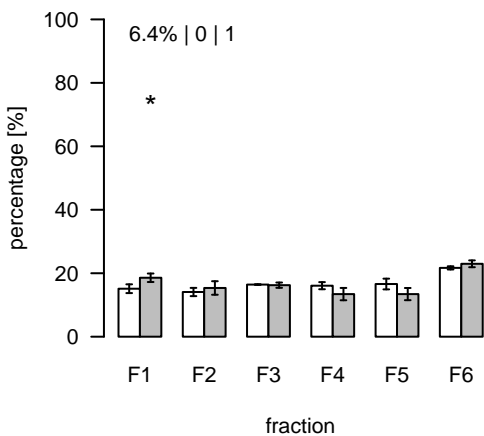

**L1773 (m/z=453.770355; rt=8.91495)**  
T/S Cluster: L-8.9-5

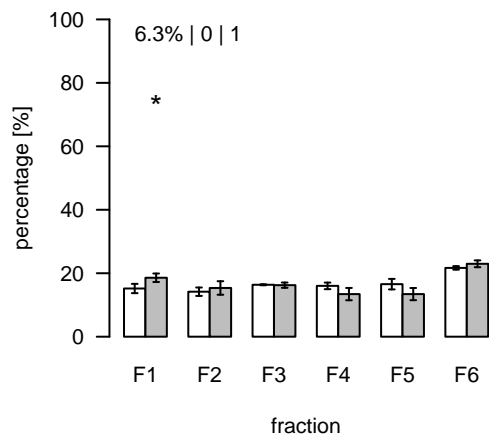

**L1771 (m/z=908.461527; rt=8.91494)**  
T/S Cluster: L-8.9-5

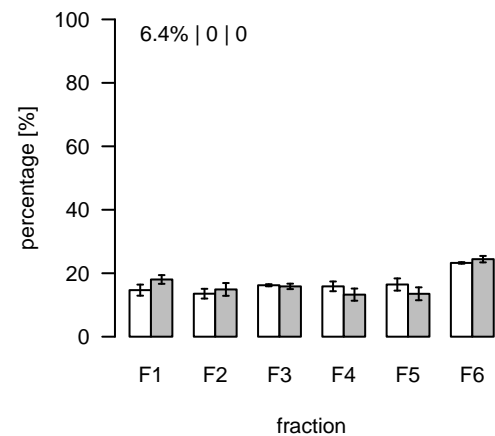

**L1764 (m/z=454.265875; rt=8.91431)**  
T/S Cluster: L-8.9-5

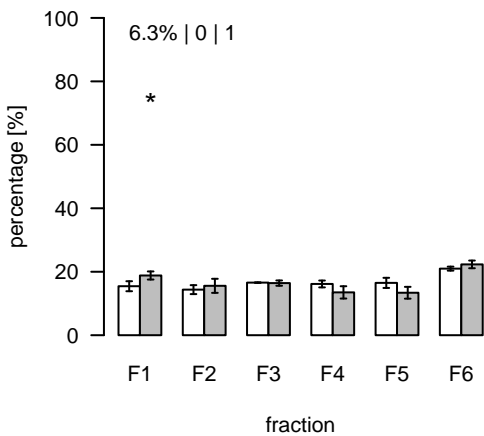

**L1769 (m/z=454.270404; rt=8.91482)**  
T/S Cluster: L-8.9-5

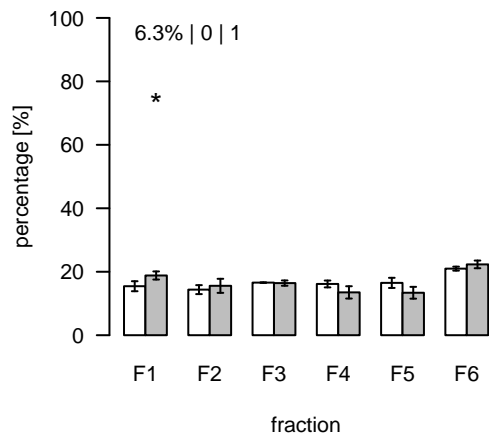

**L1775 (m/z=454.262416; rt=8.91496)**  
T/S Cluster: L-8.9-5

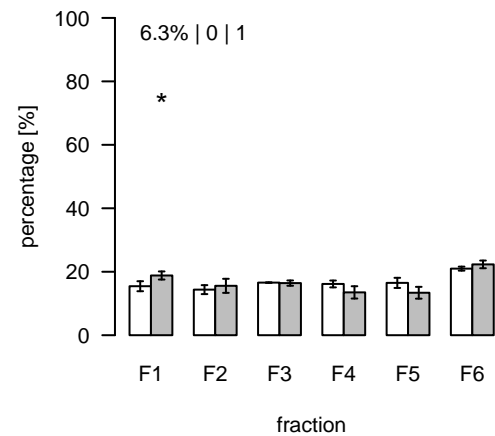

**L1774 (m/z=302.513781; rt=8.91496)**  
T/S Cluster: L-8.9-5

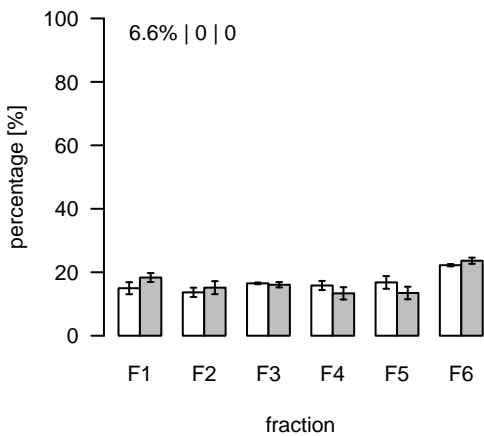

**L1782 (m/z=454.763947; rt=8.91593)**  
T/S Cluster: L-8.9-5

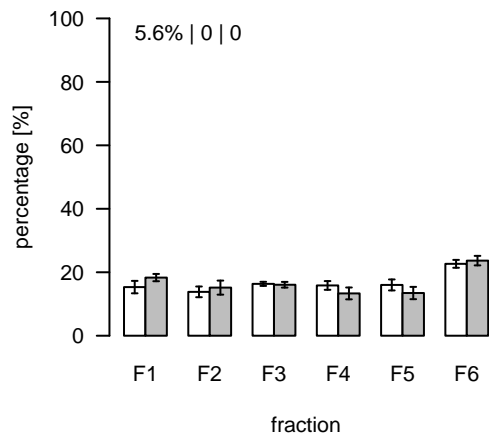

**L1767 (m/z=302.848415; rt=8.91475)**  
T/S Cluster: L-8.9-5

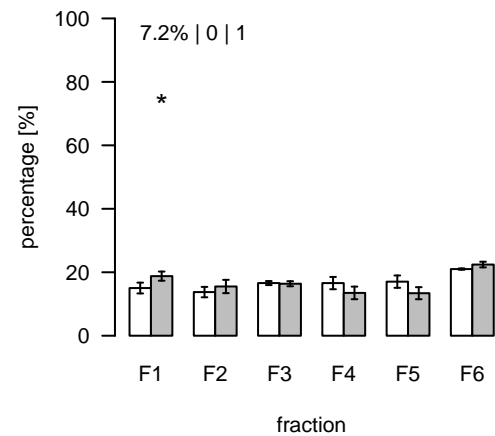

**L1791 (m/z=454.773921; rt=8.91767)**  
T/S Cluster: L-8.9-5

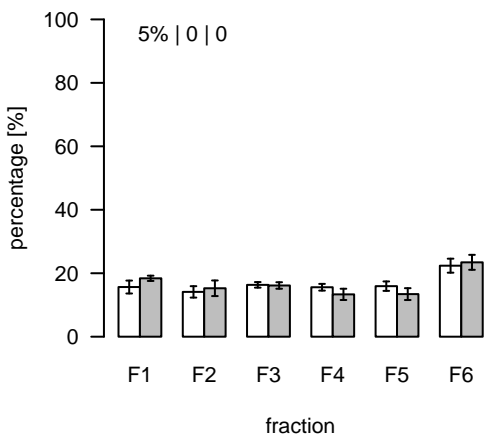

**L1781 (m/z=302.50903; rt=8.91532)**  
T/S Cluster: L-8.9-5

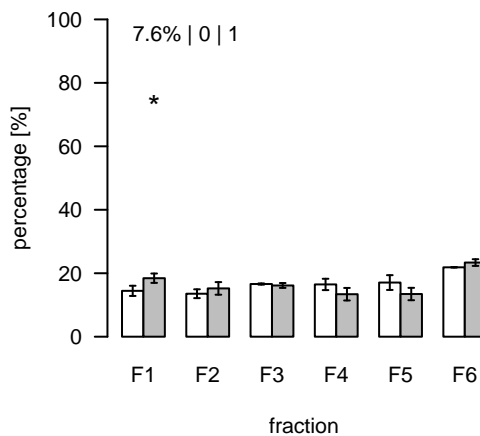

**L1776 (m/z=302.844169; rt=8.91505)**  
T/S Cluster: L-8.9-5

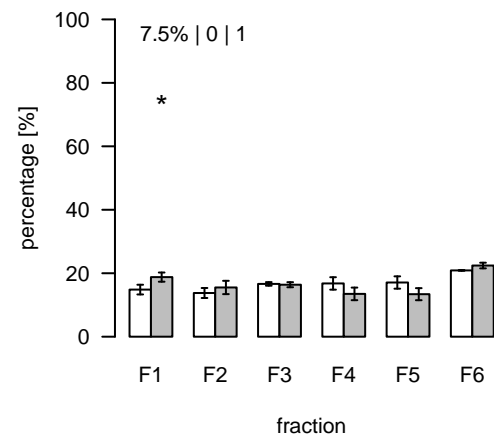

**L1765 (m/z=303.180378; rt=8.91452)**  
T/S Cluster: L-8.9-5

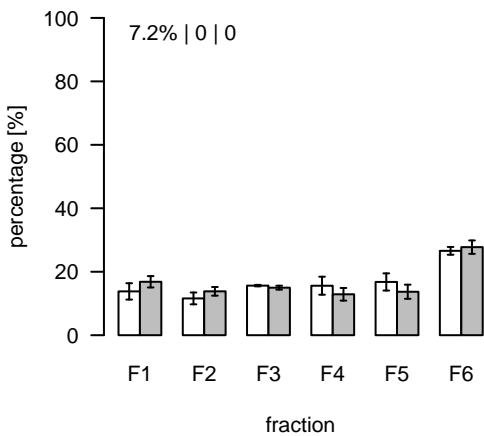

**L1785 (m/z=455.265168; rt=8.91706)**  
T/S Cluster: L-8.9-5

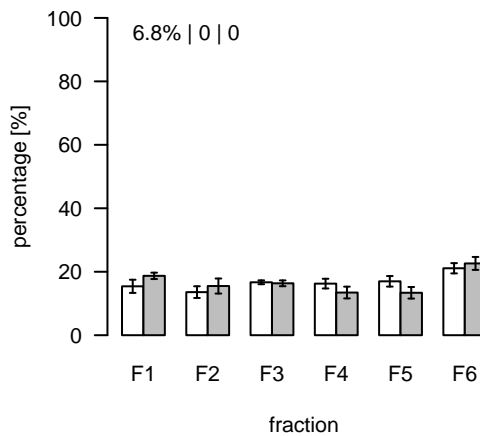

**L1770 (m/z=303.183901; rt=8.91483)**  
T/S Cluster: L-8.9-5

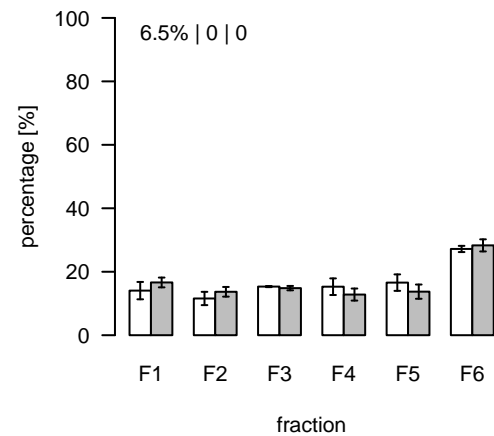

**L1802 (m/z=906.52167; rt=8.91967)**  
T/S Cluster: L-8.9-5

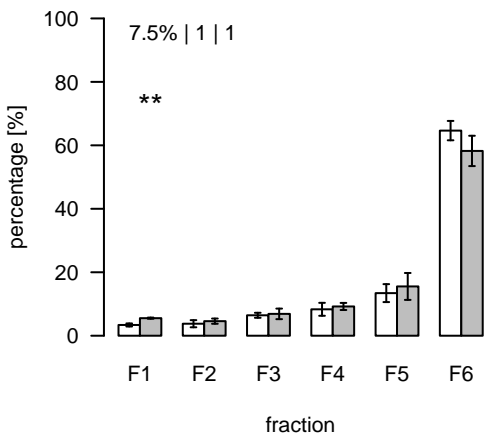

**L1806 (m/z=906.558238; rt=8.9209)**  
T/S Cluster: L-8.9-5

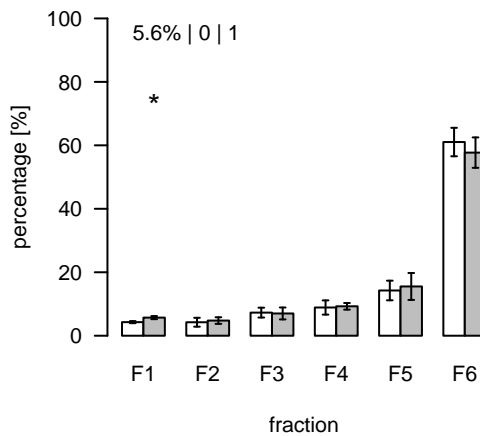

**L1762 (m/z=226.885934; rt=8.91424)**  
T/S Cluster: L-8.9-5

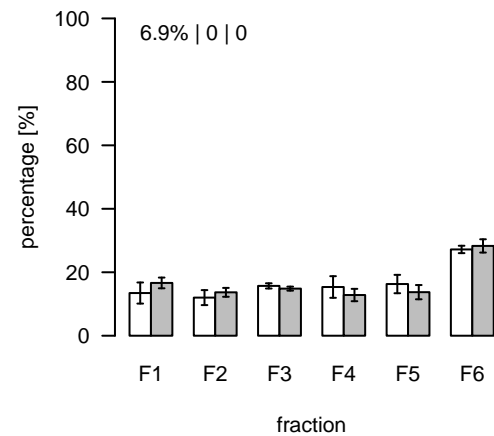

**L1763 (m/z=226.882113; rt=8.91428)**  
T/S Cluster: L-8.9-5

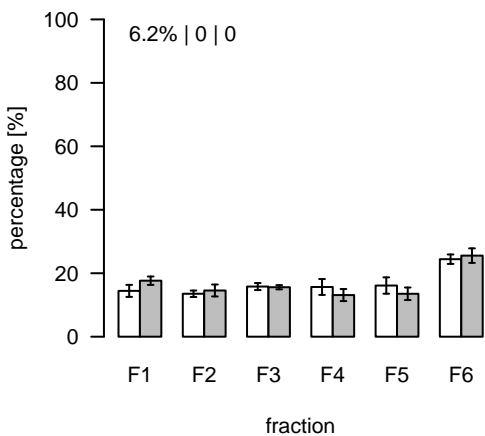

**L1761 (m/z=629.227653; rt=8.91403)**  
T/S Cluster: L-8.9-5

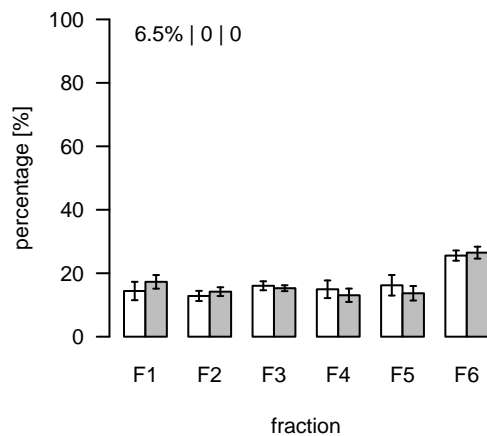

**L1766 (m/z=967.586874; rt=8.91462)**  
T/S Cluster: L-8.9-6

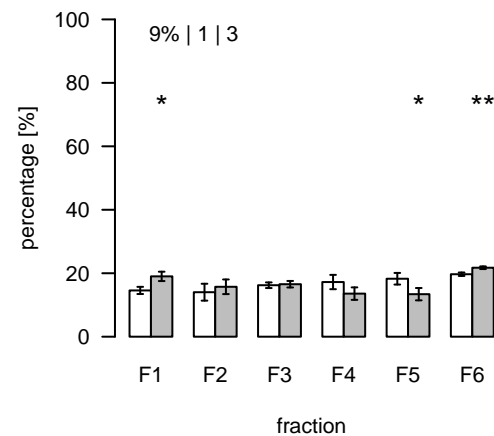

**L1772 (m/z=908.611069; rt=8.91495)**  
T/S Cluster: L-8.9-7

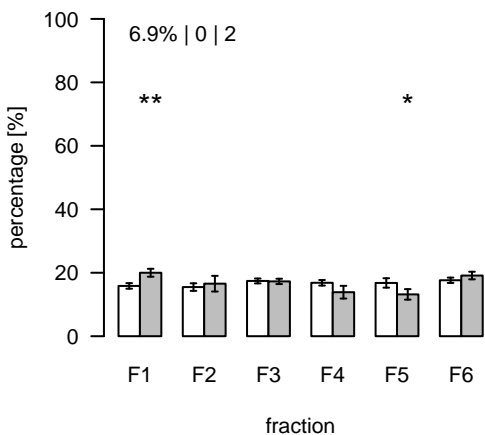

**L1784 (m/z=302.523112; rt=8.91701)**  
T/S Cluster: L-8.9-8

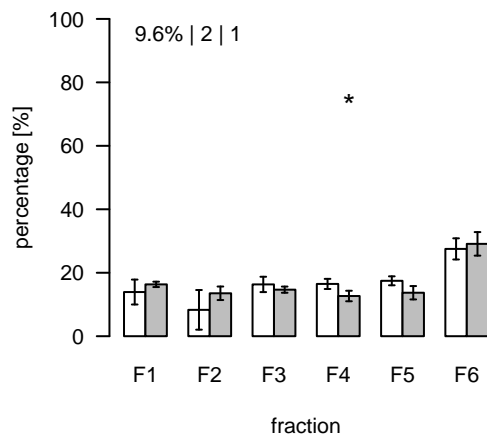

**L1790 (m/z=929.508663; rt=8.91756)**  
T/S Cluster: L-8.9-9

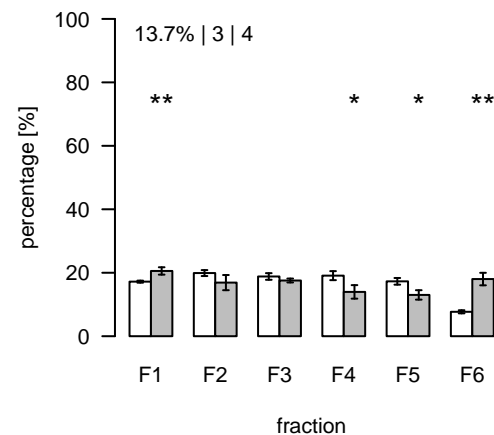

**L1789 (m/z=930.511793; rt=8.91748)**  
T/S Cluster: L-8.9-9

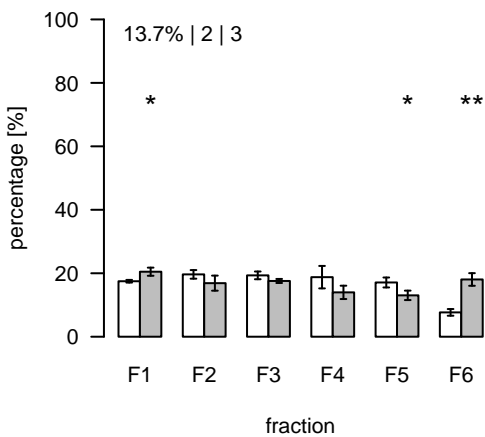

**L1792 (m/z=1104.707162; rt=8.91773)**  
T/S Cluster: L-8.9-10

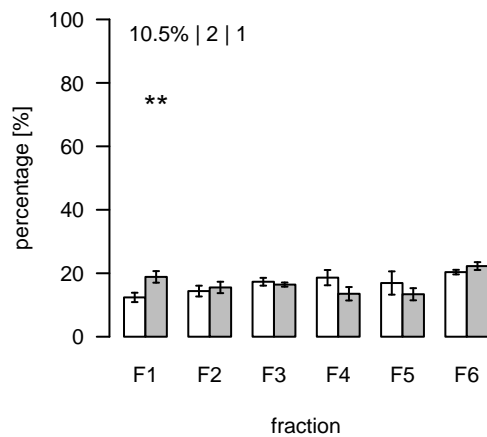

**L1796 (m/z=1104.707104; rt=8.91793)**  
T/S Cluster: L-8.9-10

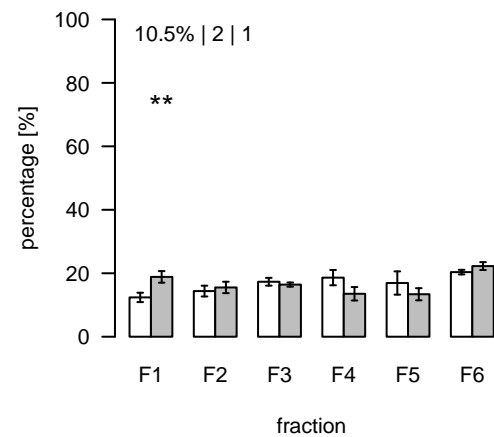

**L1793 (m/z=910.533879; rt=8.91775)**  
T/S Cluster: L-8.9-11

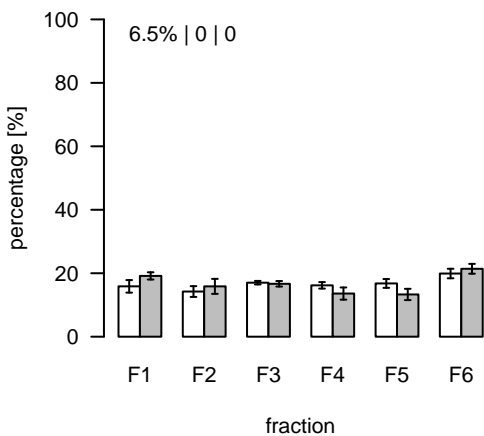

**L1794 (m/z=910.52842; rt=8.91787)**  
T/S Cluster: L-8.9-11

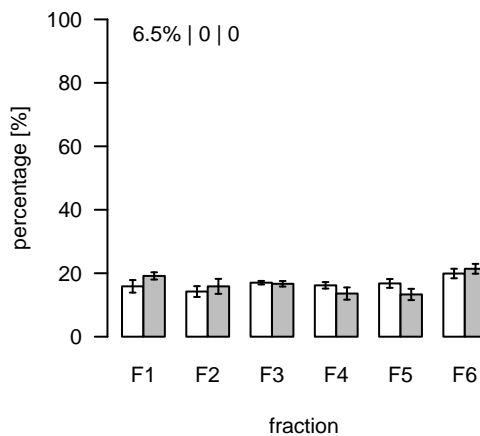

**L1798 (m/z=455.275245; rt=8.91855)**  
T/S Cluster: L-8.9-11

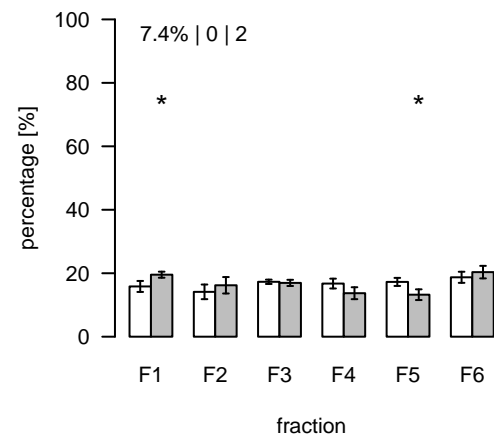

**L1795 (m/z=968.587427; rt=8.91788)**  
T/S Cluster: L-8.9-12

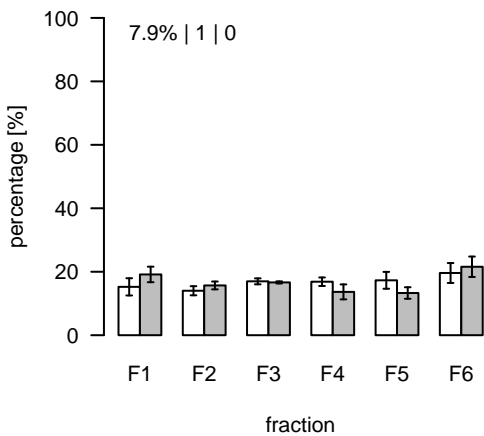

**L1797 (m/z=968.587407; rt=8.91804)**  
T/S Cluster: L-8.9-12

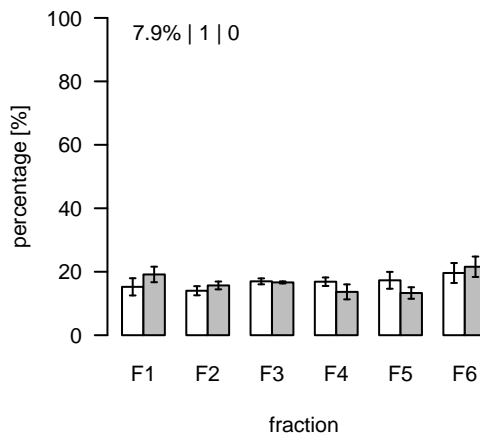

**L1799 (m/z=912.534298; rt=8.91921)**  
T/S Cluster: L-8.9-13

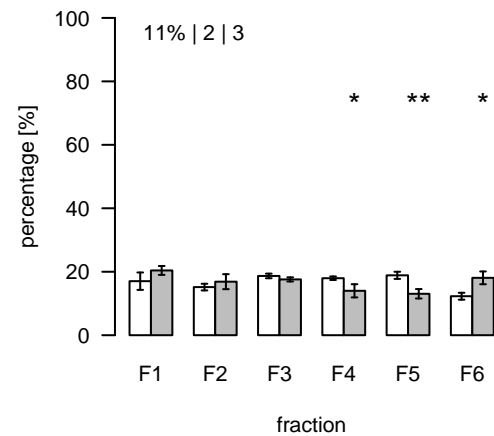

**L1800 (m/z=931.510636; rt=8.91929)**  
T/S Cluster: L-8.9-14

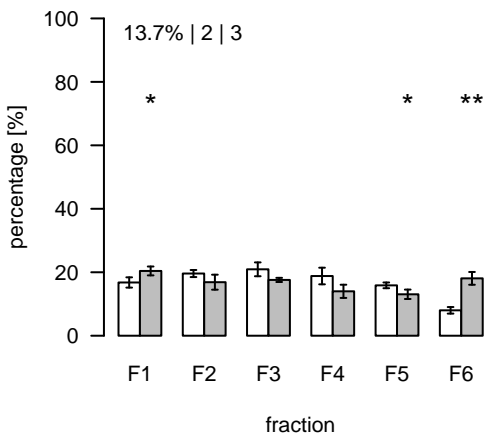

**L1801 (m/z=437.748343; rt=8.91949)**  
T/S Cluster: L-8.9-15

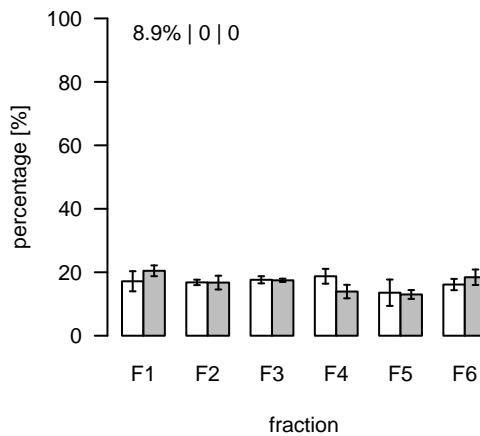

**L1803 (m/z=391.285884; rt=8.91988)**  
T/S Cluster: L-8.9-16

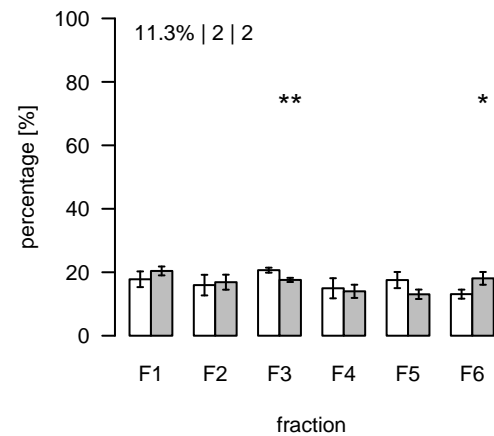

**L1804 (m/z=911.530407; rt=8.92028)**  
T/S Cluster: L-8.9-17

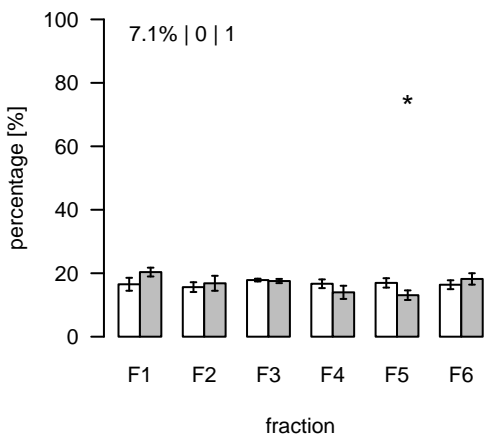

**L1805 (m/z=911.537429; rt=8.92037)**  
T/S Cluster: L-8.9-17

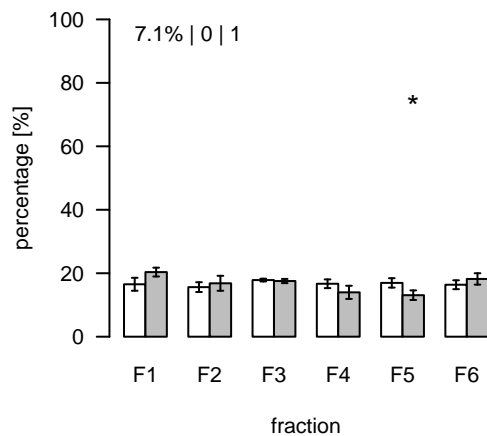

**L1807 (m/z=388.343263; rt=8.92296)**  
T/S Cluster: L-8.9-18

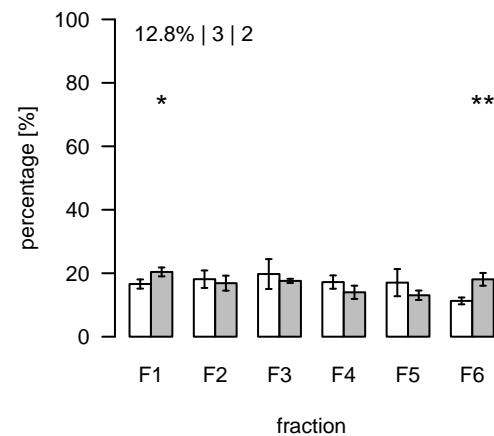

**L1808 (m/z=924.525286; rt=8.94877)**  
T/S Cluster: L-8.9-19

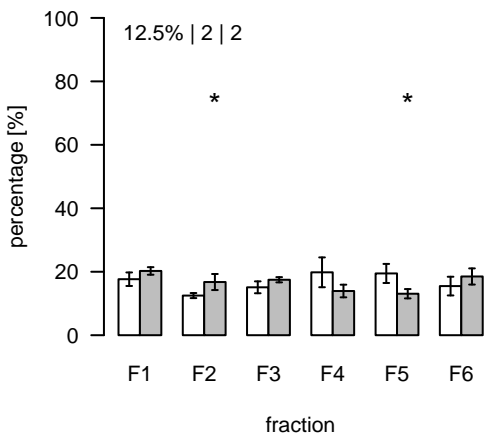

**L1809 (m/z=923.522363; rt=8.9506)**  
T/S Cluster: L-9-1

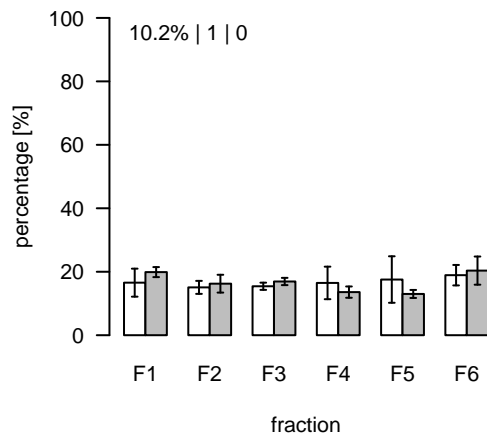

**L1810 (m/z=923.488899; rt=8.95227)**  
T/S Cluster: L-9-1

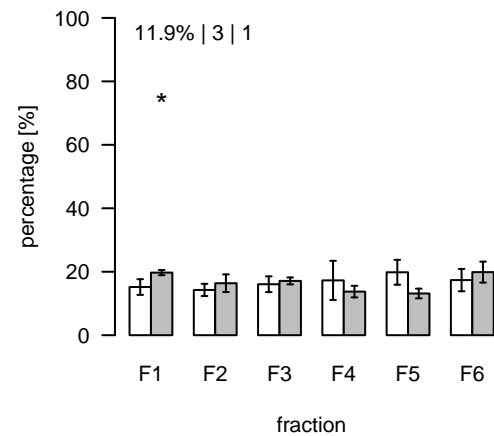

**L1812 (m/z=960.666113; rt=9.01061)**  
T/S Cluster: L-9-2

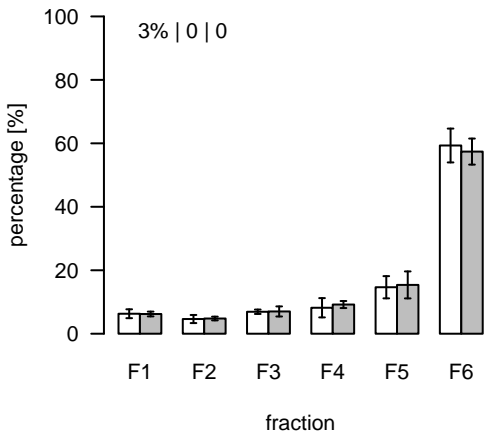

**L1813 (m/z=961.671571; rt=9.01103)**  
T/S Cluster: L-9-2

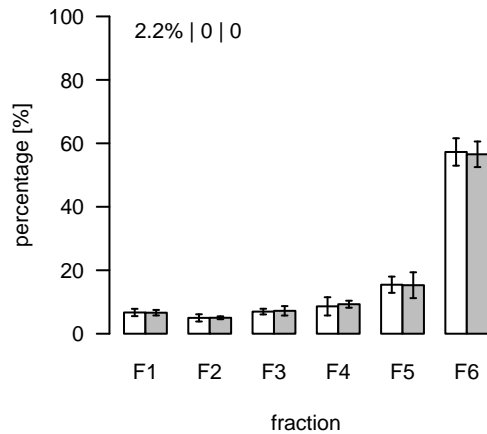

**L1814 (m/z=961.631969; rt=9.01205)**  
T/S Cluster: L-9-2

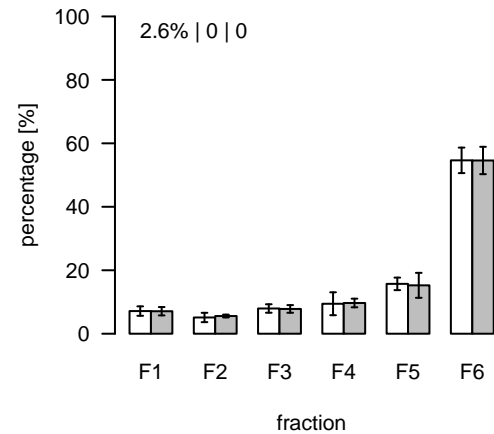



**L1811 (m/z=961.672488; rt=8.96542)**  
T/S Cluster: L-9-2

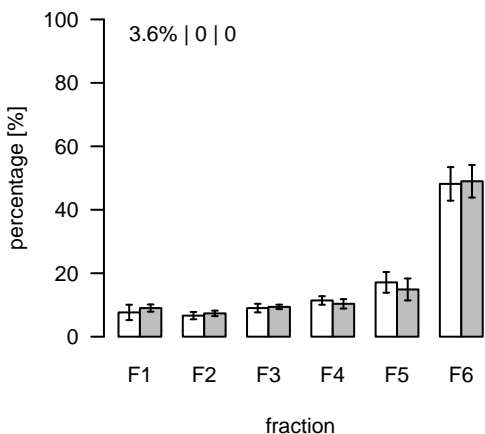

**L1815 (m/z=746.57283; rt=9.0371)**  
T/S Cluster: L-9-3

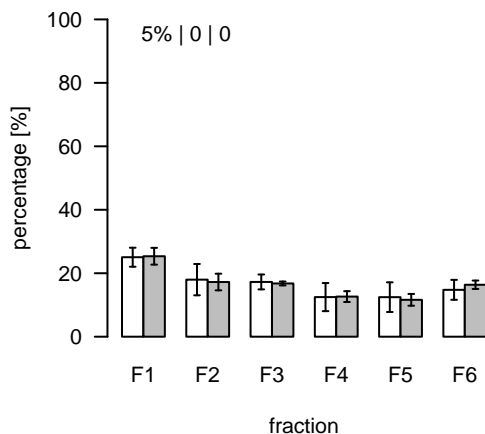

**L1816 (m/z=747.576029; rt=9.03767)**  
T/S Cluster: L-9-3

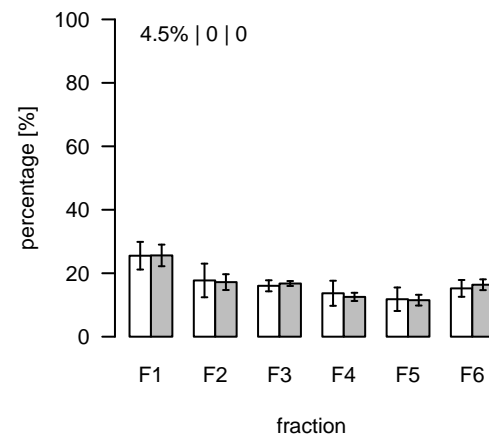

**L1823 (m/z=784.588466; rt=9.06083)**  
T/S Cluster: L-9.1-1

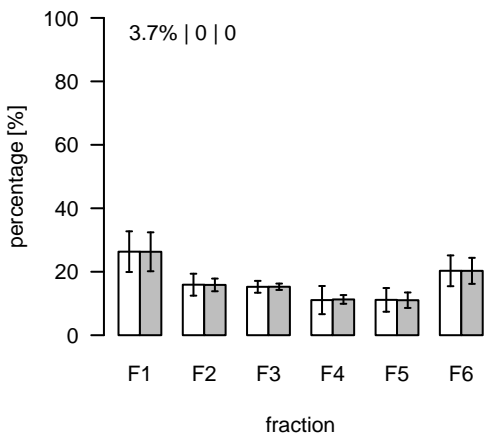

**L1821 (m/z=785.594111; rt=9.06051)**  
T/S Cluster: L-9.1-1

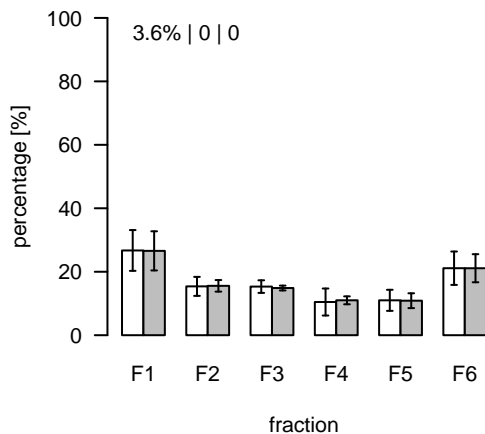

**L1822 (m/z=784.556825; rt=9.06078)**  
T/S Cluster: L-9.1-1

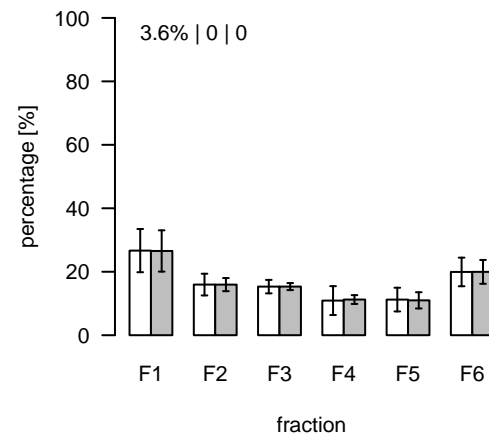

**L1820 (m/z=785.570877; rt=9.06048)**  
T/S Cluster: L-9.1-1

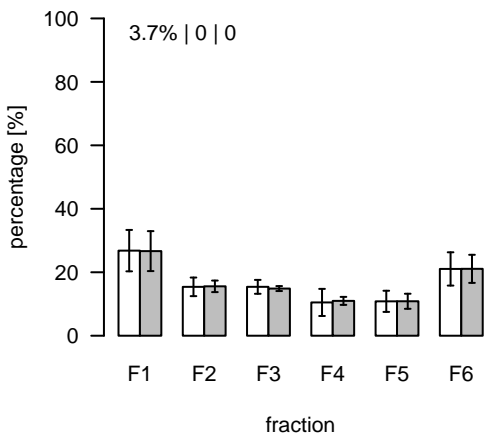

**L1829 (m/z=758.572127; rt=9.09258)**  
T/S Cluster: L-9.1-1

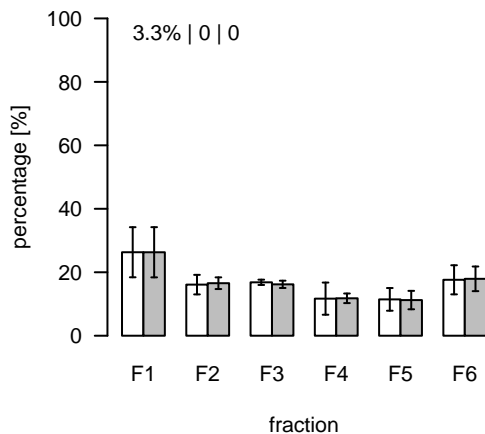

**L1819 (m/z=786.598008; rt=9.05923)**  
T/S Cluster: L-9.1-1

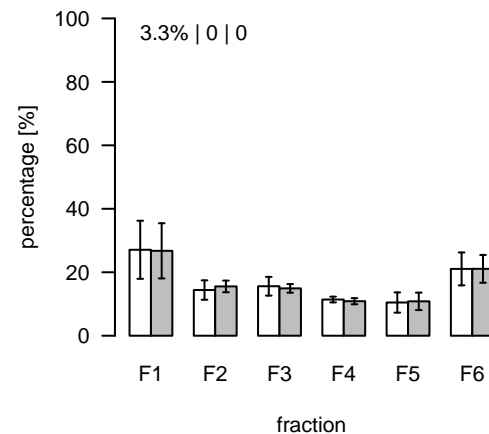

**L1824 (m/z=392.298975; rt=9.06084)**  
T/S Cluster: L-9.1-1

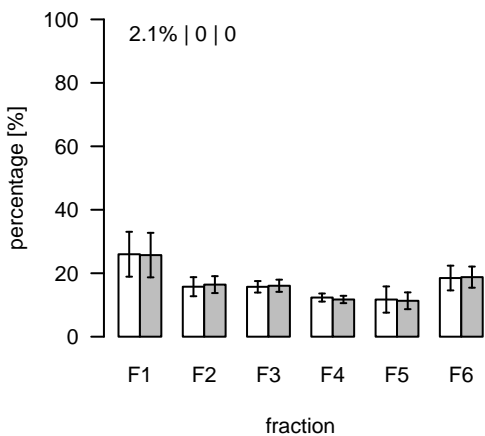

**L1825 (m/z=392.292751; rt=9.06091)**  
T/S Cluster: L-9.1-1

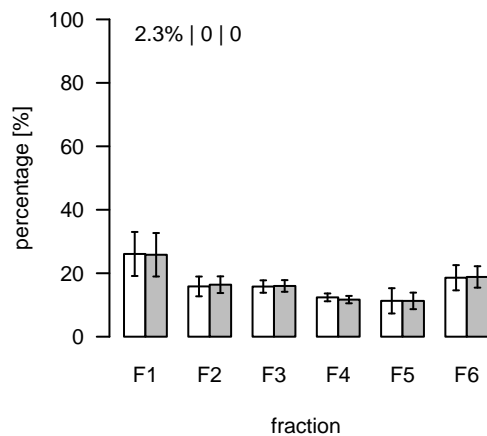

**L1817 (m/z=786.574369; rt=9.05738)**  
T/S Cluster: L-9.1-1

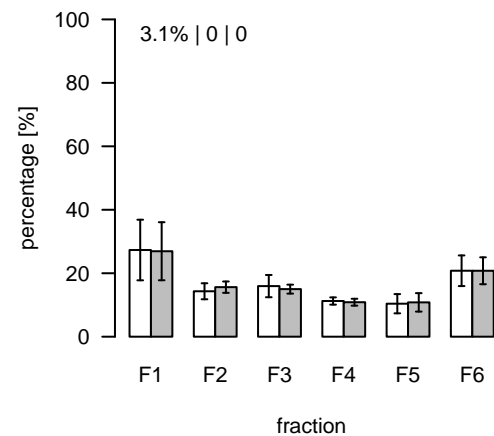

**L1828 (m/z=759.576187; rt=9.09158)**  
T/S Cluster: L-9.1-1

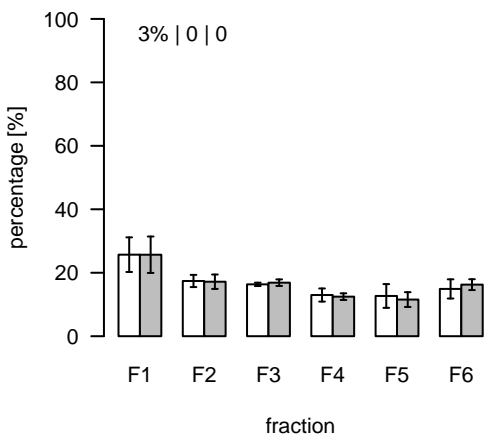

**L1826 (m/z=392.796745; rt=9.06093)**  
T/S Cluster: L-9.1-1

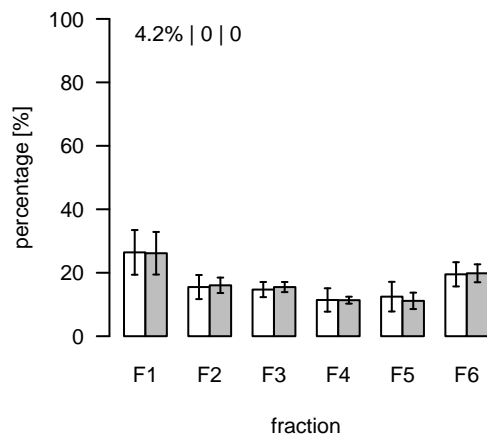

**L1818 (m/z=806.57071; rt=9.05795)**  
T/S Cluster: L-9.1-1

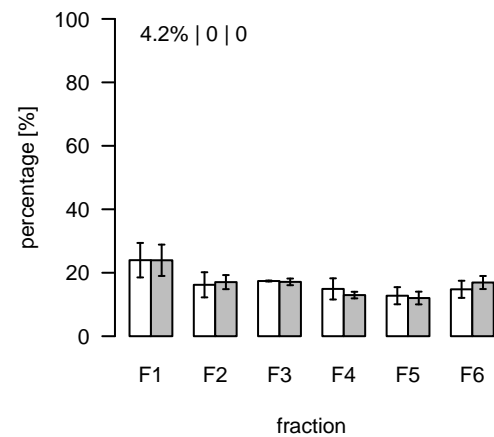

**L1827 (m/z=810.603538; rt=9.0693)**  
T/S Cluster: L-9.1-2

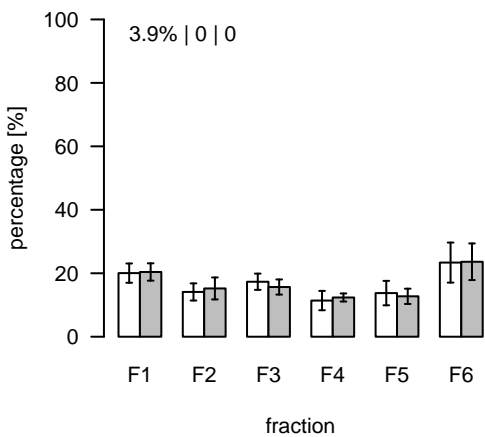

**L1831 (m/z=887.572046; rt=9.16)**  
T/S Cluster: L-9.2-1

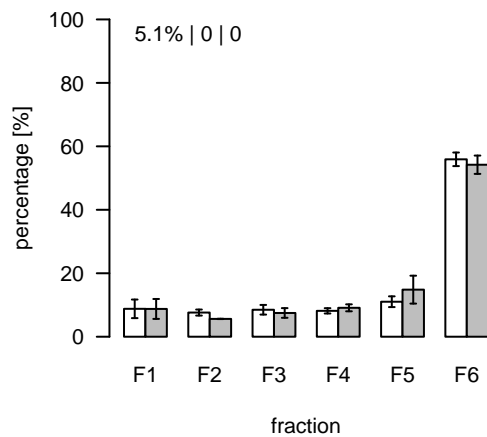

**L1832 (m/z=887.5441; rt=9.16028)**  
T/S Cluster: L-9.2-1

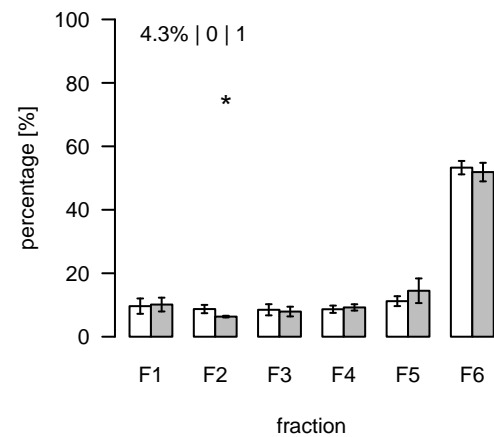

**L1830 (m/z=888.576609; rt=9.15903)**  
T/S Cluster: L-9.2-1

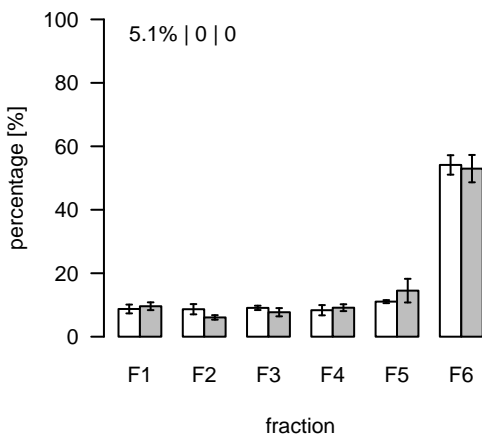

**L1835 (m/z=909.545507; rt=9.18953)**  
T/S Cluster: L-9.2-2

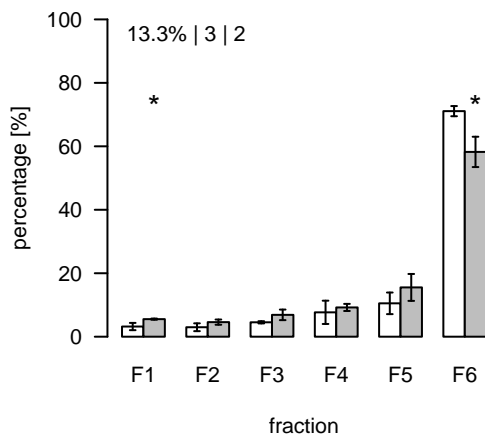

**L1834 (m/z=910.545805; rt=9.18792)**  
T/S Cluster: L-9.2-2

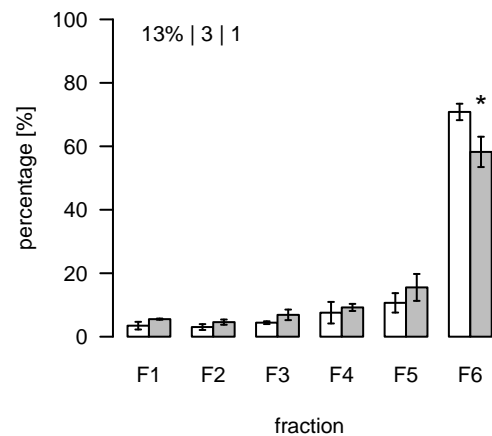

**L1836 (m/z=909.507492; rt=9.19053)**  
T/S Cluster: L-9.2-2

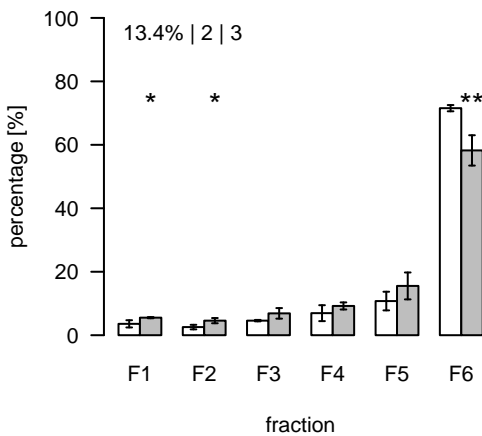

**L1833 (m/z=911.544974; rt=9.18787)**  
T/S Cluster: L-9.2-2

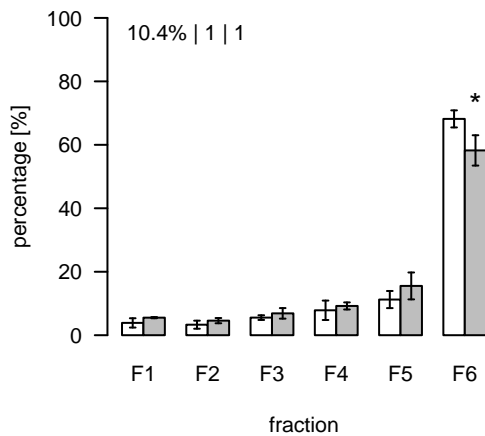

**L1837 (m/z=904.571559; rt=9.22311)**  
T/S Cluster: L-9.2-3

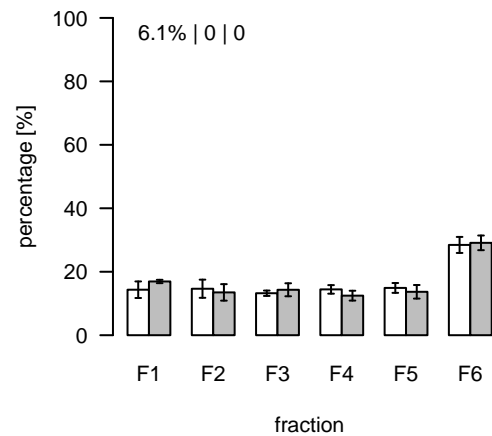

**L1839 (m/z=919.561883; rt=9.25867)**  
T/S Cluster: L-9.3-1

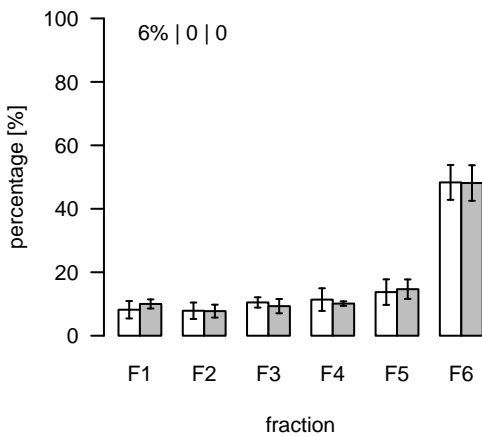

**L1838 (m/z=919.585503; rt=9.25835)**  
T/S Cluster: L-9.3-1

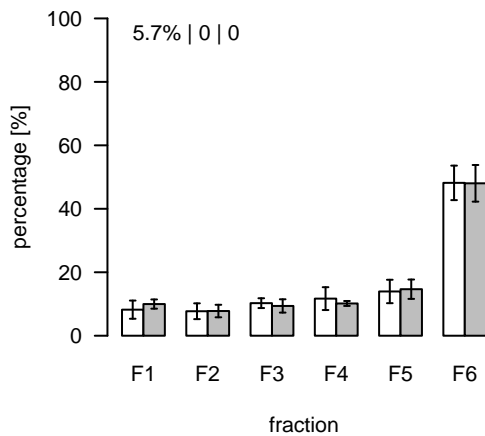

**L1846 (m/z=907.524909; rt=9.27432)**  
T/S Cluster: L-9.3-1

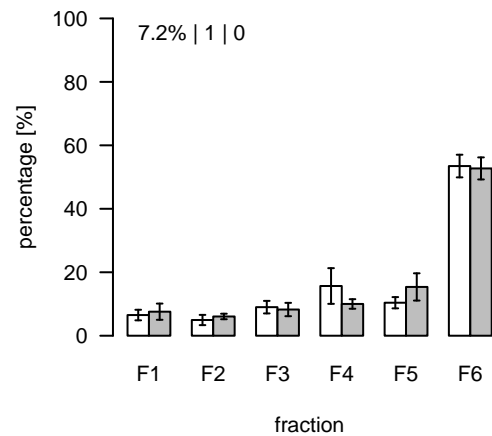

**L1842 (m/z=908.528451; rt=9.27001)**  
T/S Cluster: L-9.3-1

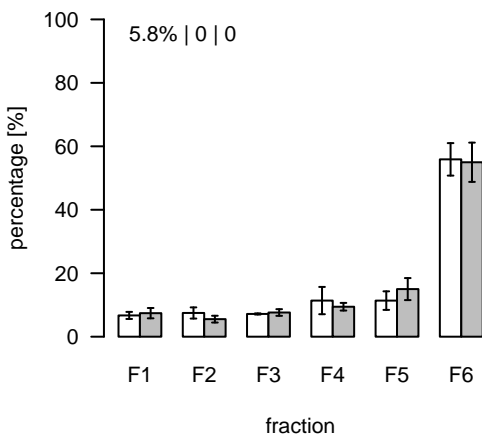

**L1840 (m/z=772.588088; rt=9.26938)**  
T/S Cluster: L-9.3-2

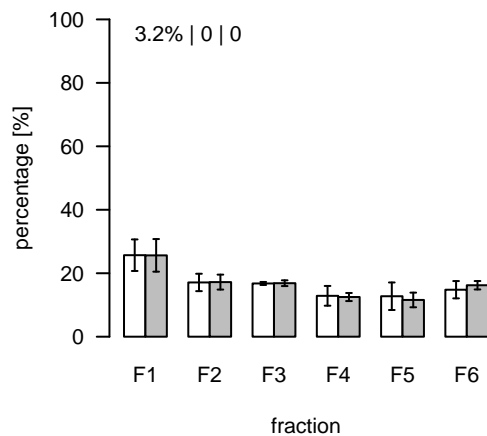

**L1841 (m/z=772.572164; rt=9.2695)**  
T/S Cluster: L-9.3-2

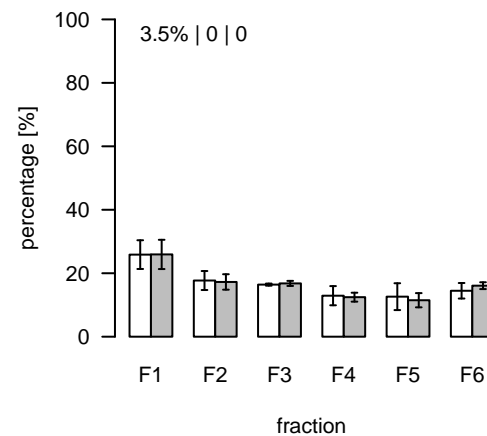

**L1843 (m/z=772.561838; rt=9.27177)**  
T/S Cluster: L-9.3-2

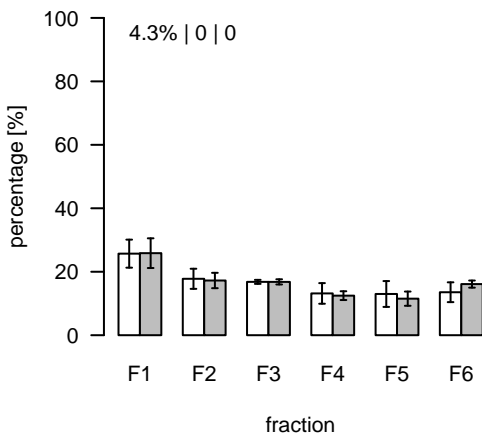

**L1844 (m/z=773.591368; rt=9.27293)**  
T/S Cluster: L-9.3-2

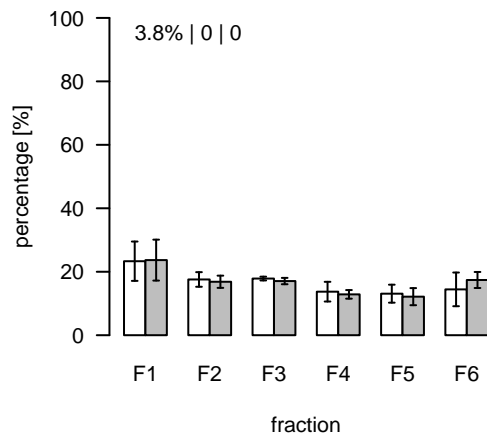

**L1845 (m/z=773.593024; rt=9.27325)**  
T/S Cluster: L-9.3-2

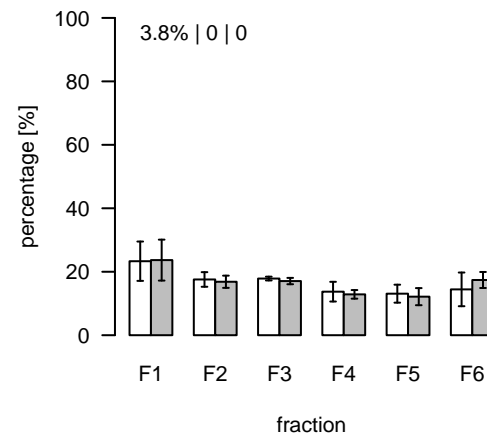

**L1847 (m/z=773.574274; rt=9.27454)**  
T/S Cluster: L-9.3-2

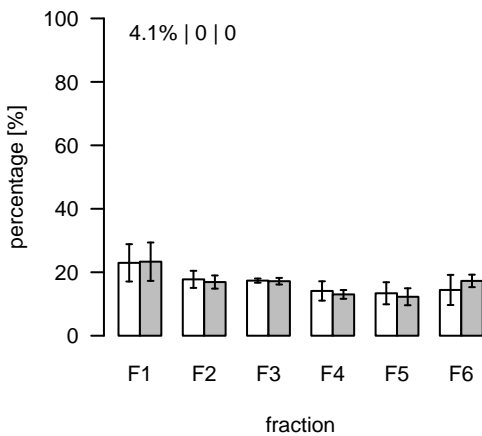

**L1852 (m/z=923.501657; rt=9.3087)**  
T/S Cluster: L-9.3-3

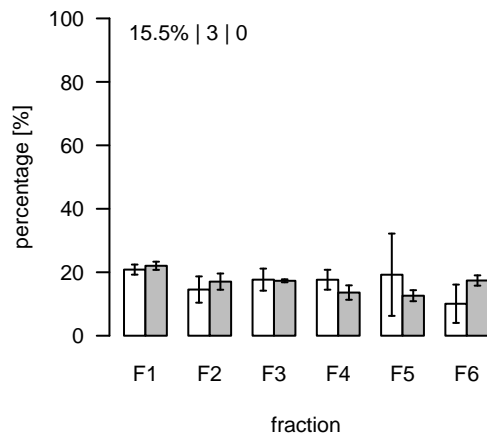

**L1849 (m/z=923.487896; rt=9.28837)**  
T/S Cluster: L-9.3-3

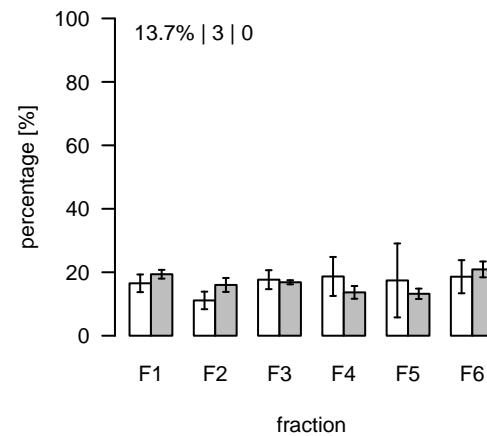

**L1851 (m/z=924.523207; rt=9.30547)**  
T/S Cluster: L-9.3-3

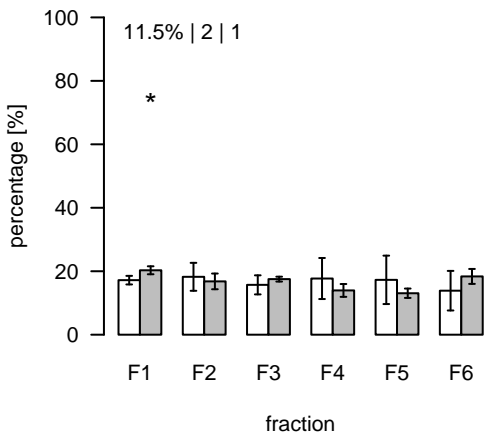

**L1848 (m/z=924.524139; rt=9.28297)**  
T/S Cluster: L-9.3-3

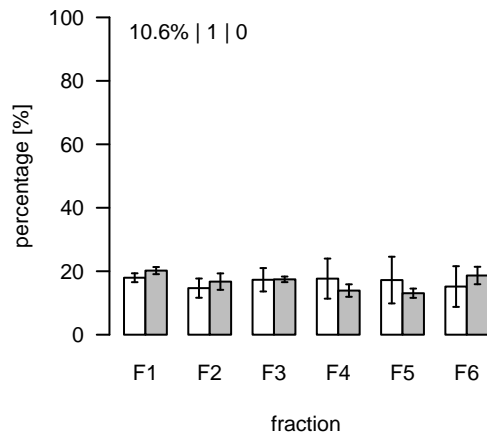

**L1850 (m/z=923.521401; rt=9.30183)**  
T/S Cluster: L-9.3-4

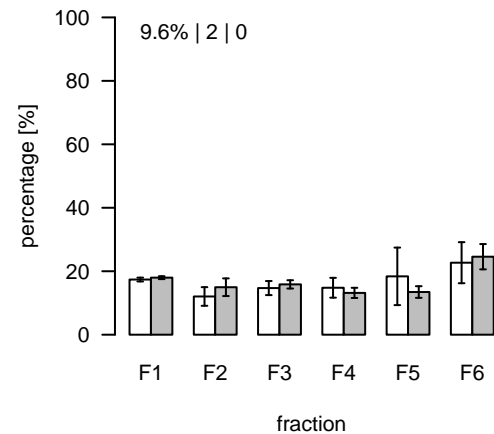

**L1853 (m/z=923.517866; rt=9.3292)**  
T/S Cluster: L-9.3-5

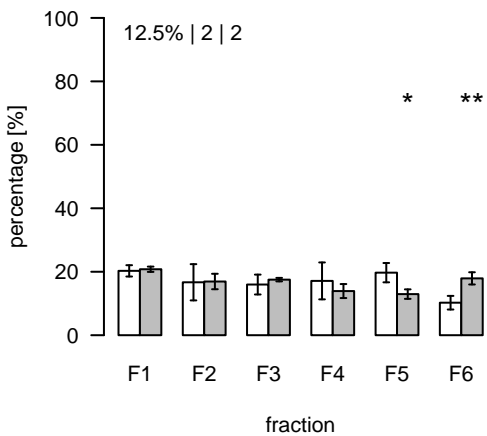

**L1854 (m/z=910.651152; rt=9.3444)**  
T/S Cluster: L-9.3-6

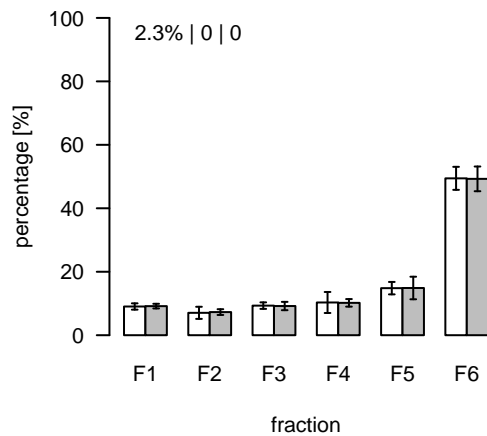

**L1855 (m/z=911.654746; rt=9.34441)**  
T/S Cluster: L-9.3-6

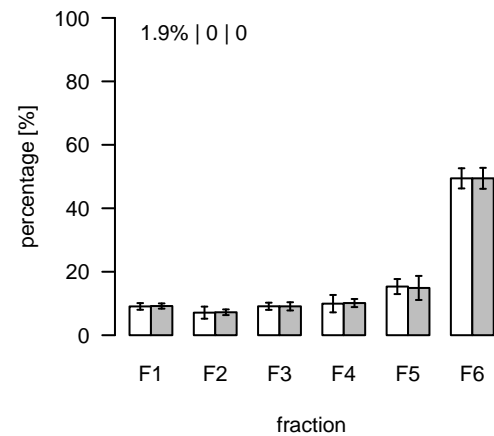

**L1856 (m/z=915.606045; rt=9.34536)**  
T/S Cluster: L-9.3-6

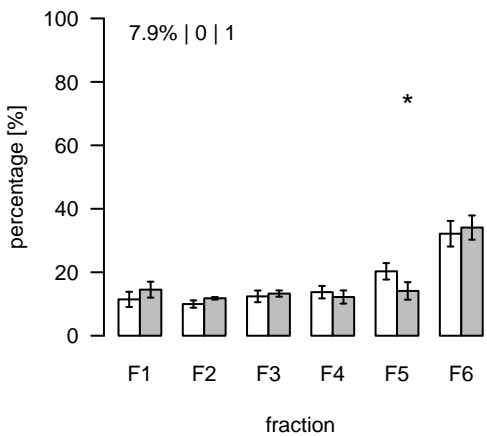

**L1861 (m/z=907.52572; rt=9.4348)**  
T/S Cluster: L-9.4-1

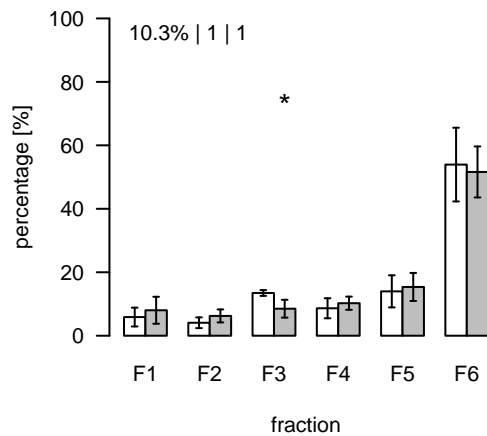

**L1859 (m/z=908.528466; rt=9.43462)**  
T/S Cluster: L-9.4-1

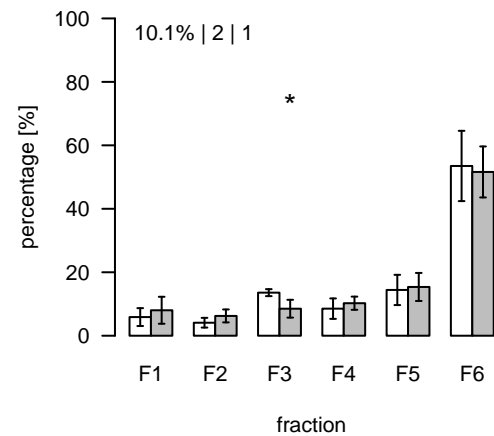

**L1869 (m/z=909.503828; rt=9.43847)**  
T/S Cluster: L-9.4-1

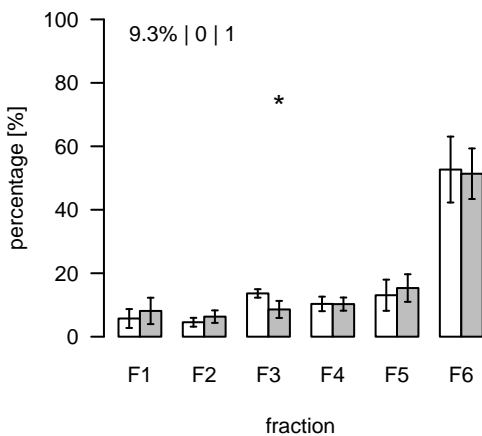

**L1858 (m/z=907.466113; rt=9.43455)**  
T/S Cluster: L-9.4-1

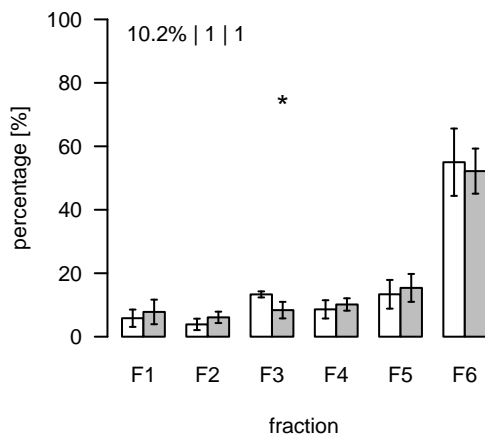

**L1866 (m/z=908.589221; rt=9.43549)**  
T/S Cluster: L-9.4-1

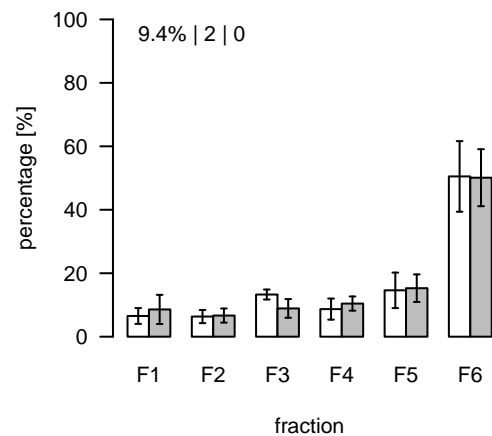

**L1860 (m/z=453.761788; rt=9.43474)**  
T/S Cluster: L-9.4-1

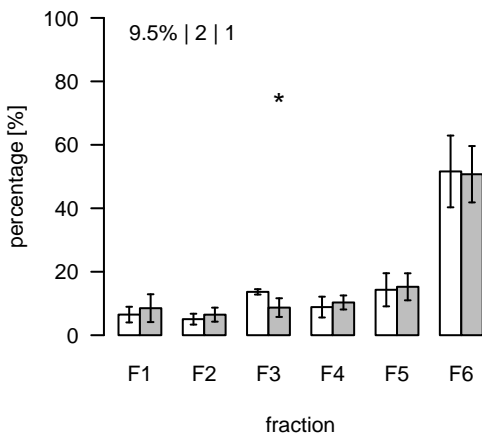

**L1862 (m/z=908.46245; rt=9.43485)**  
T/S Cluster: L-9.4-1

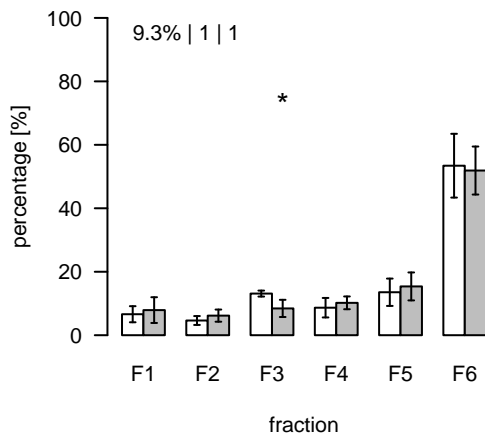

**L1865 (m/z=453.770089; rt=9.43512)**  
T/S Cluster: L-9.4-1

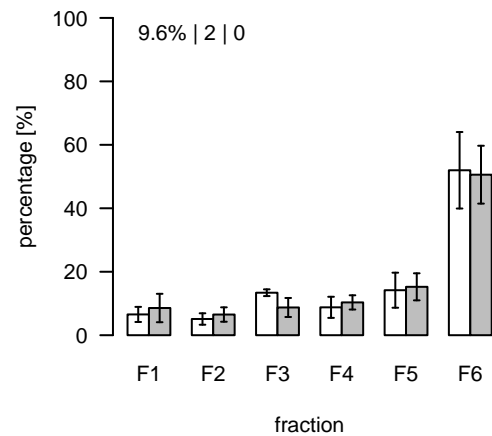

**L1857 (m/z=910.52687; rt=9.43096)**  
T/S Cluster: L-9.4-1

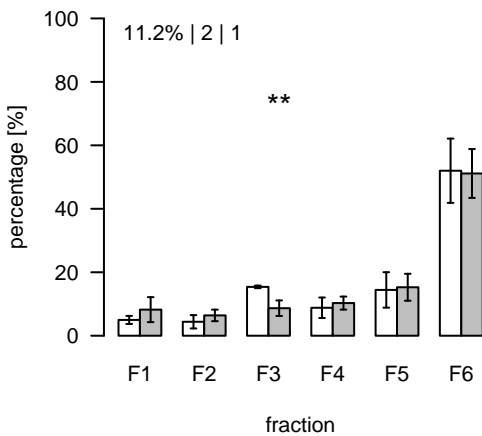

**L1863 (m/z=454.262123; rt=9.43492)**  
T/S Cluster: L-9.4-1

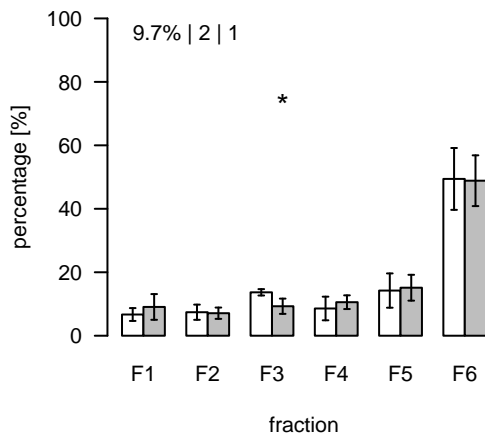

**L1864 (m/z=454.270222; rt=9.43511)**  
T/S Cluster: L-9.4-1

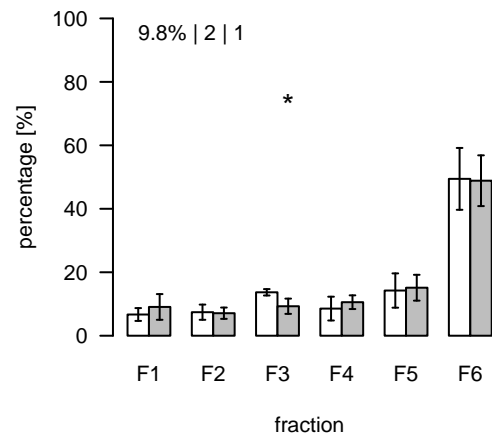

**L1867 (m/z=929.50821; rt=9.43715)**  
T/S Cluster: L-9.4-2

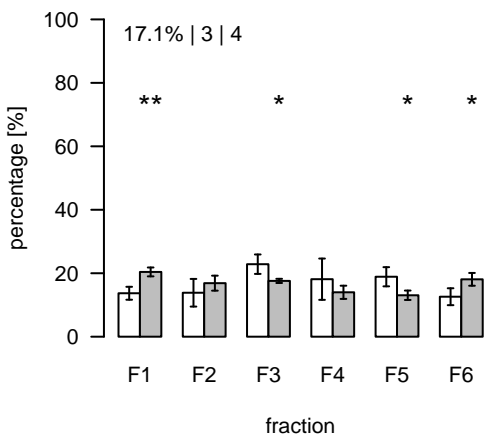

**L1868 (m/z=930.51098; rt=9.43749)**  
T/S Cluster: L-9.4-2

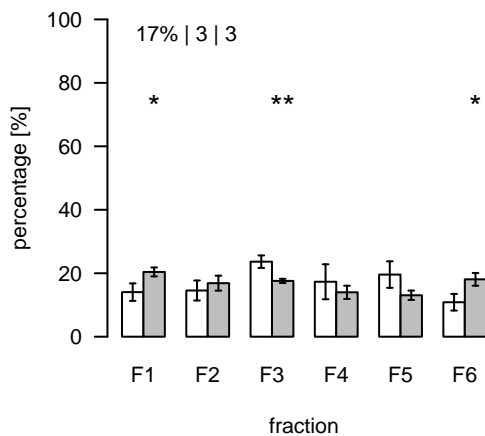

**L1870 (m/z=903.532884; rt=9.46252)**  
T/S Cluster: L-9.5-1

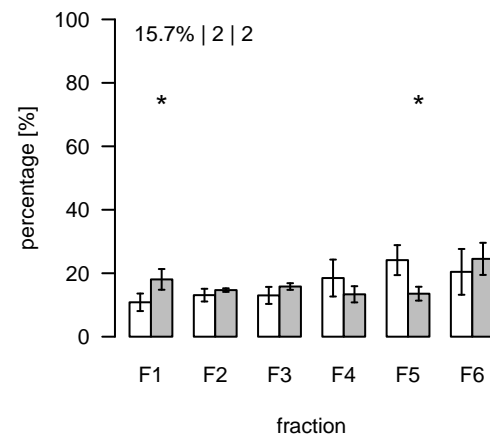

**L1871 (m/z=909.531657; rt=9.46389)**  
T/S Cluster: L-9.5-2

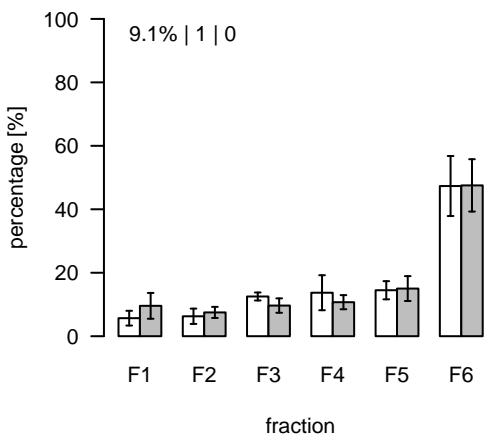

**L1872 (m/z=942.556562; rt=9.49054)**  
T/S Cluster: L-9.5-3

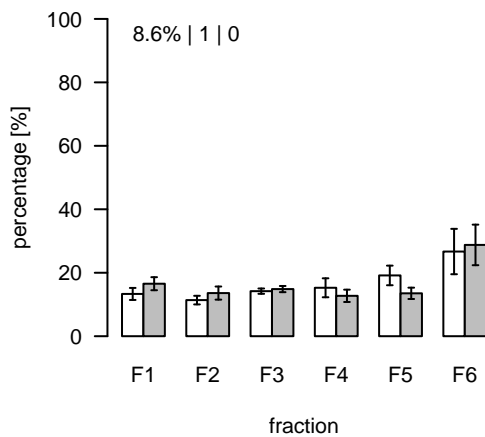

**L1882 (m/z=941.622535; rt=9.52911)**  
T/S Cluster: L-9.5-4

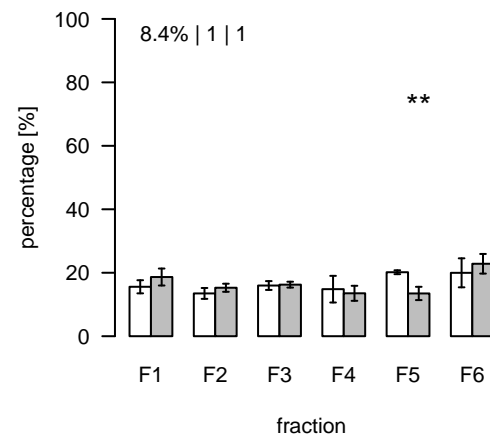

**L1873 (m/z=941.575212; rt=9.51523)**  
T/S Cluster: L-9.5-4

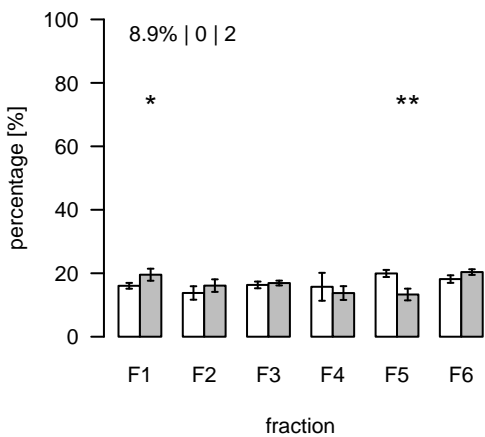

**L1881 (m/z=942.625261; rt=9.52889)**  
T/S Cluster: L-9.5-4

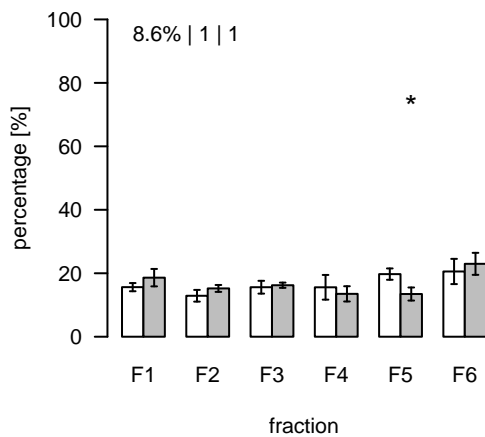

**L1880 (m/z=936.667541; rt=9.52887)**  
T/S Cluster: L-9.5-5

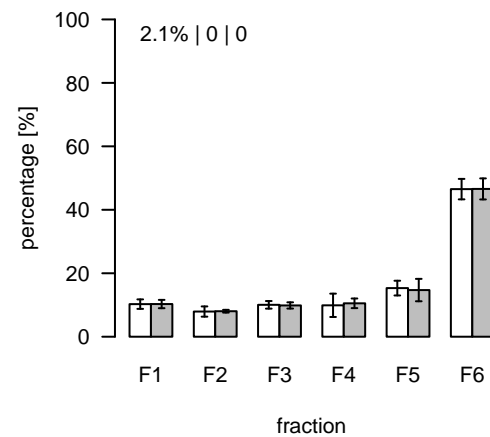

**L1878 (m/z=937.670268; rt=9.52877)**  
T/S Cluster: L-9.5-5

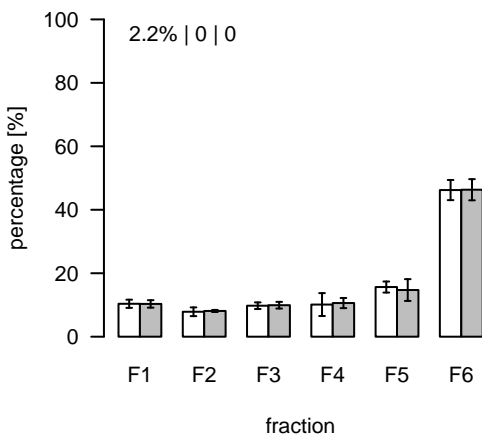

**L1875 (m/z=936.624374; rt=9.52824)**  
T/S Cluster: L-9.5-5

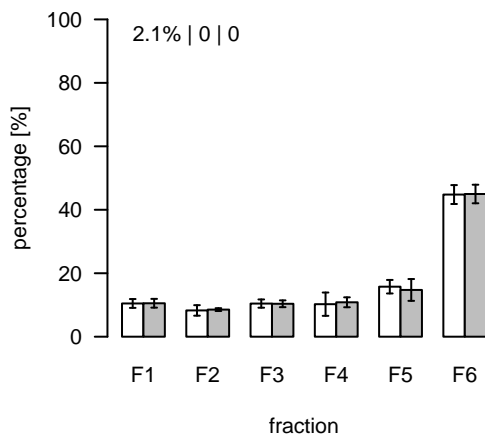

**L1874 (m/z=937.624987; rt=9.52824)**  
T/S Cluster: L-9.5-5

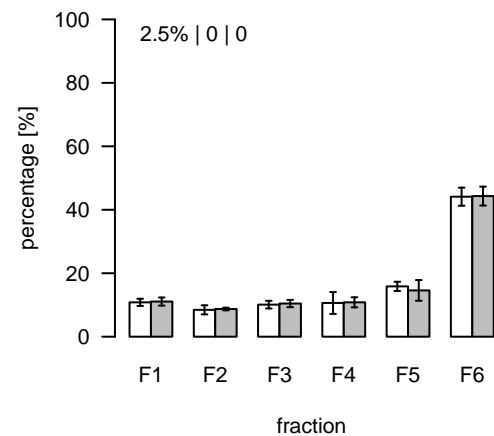

**L1879 (m/z=938.673722; rt=9.5288)**  
T/S Cluster: L-9.5-5

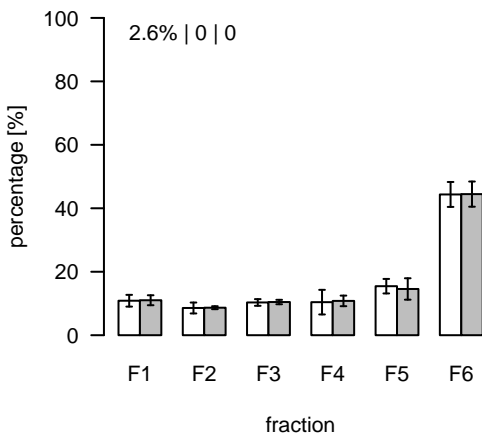

**L1883 (m/z=468.332228; rt=9.52928)**  
T/S Cluster: L-9.5-5

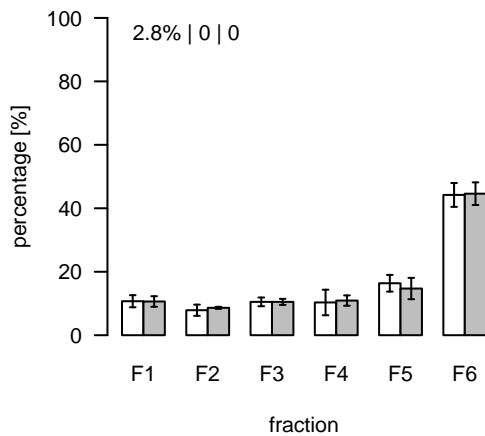

**L1884 (m/z=468.334823; rt=9.5295)**  
T/S Cluster: L-9.5-5

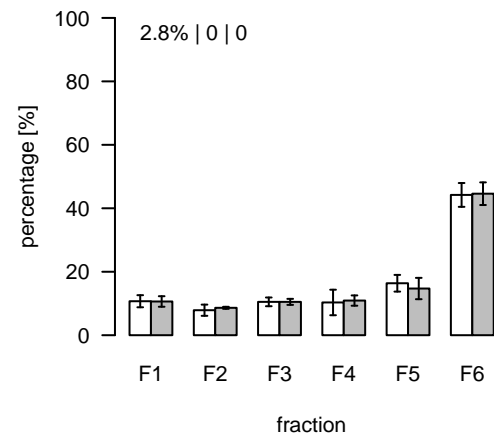

**L1876 (m/z=938.628773; rt=9.52831)**  
T/S Cluster: L-9.5-5

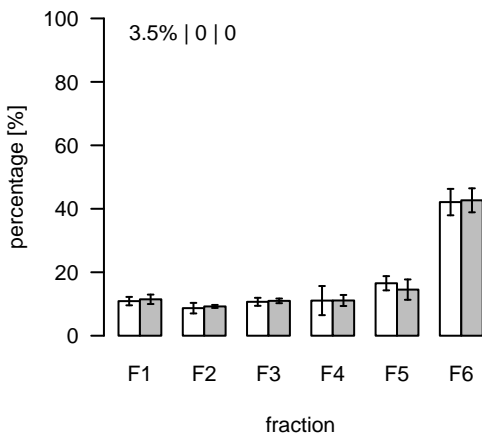

**L1886 (m/z=468.833211; rt=9.52973)**  
T/S Cluster: L-9.5-5

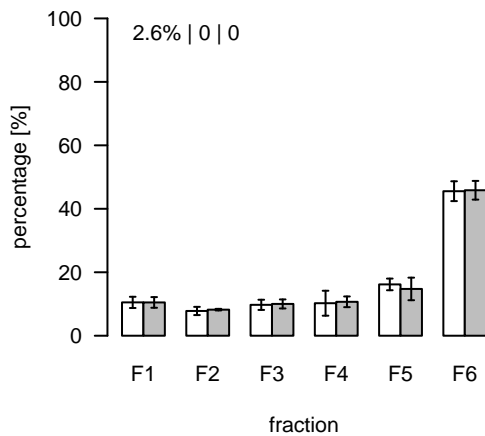

**L1887 (m/z=468.840823; rt=9.53025)**  
T/S Cluster: L-9.5-5

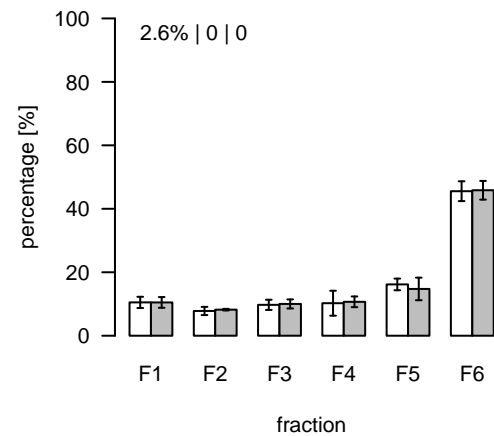



**L1877 (m/z=939.676381; rt=9.52855)**  
T/S Cluster: L-9.5-5

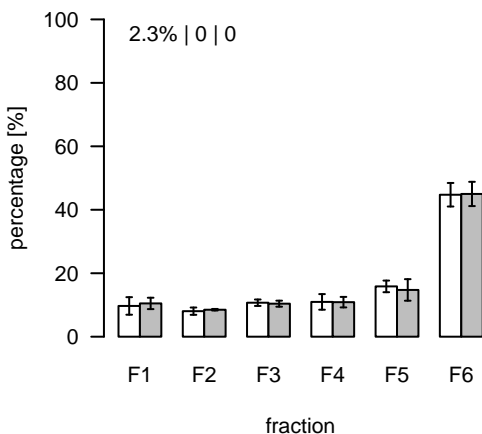

**L1885 (m/z=312.226282; rt=9.52963)**  
T/S Cluster: L-9.5-5

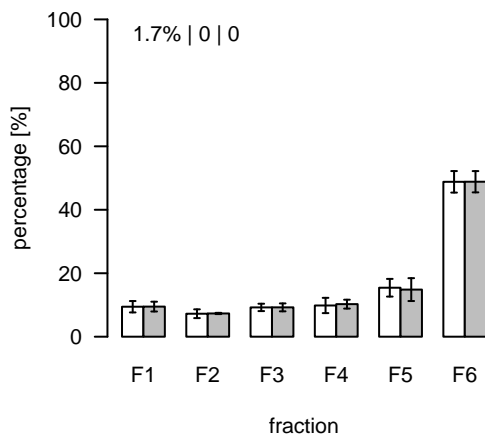

**L1888 (m/z=312.229203; rt=9.53035)**  
T/S Cluster: L-9.5-5

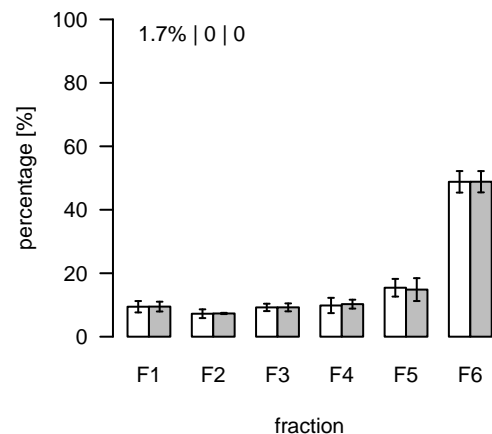

**L1889 (m/z=937.577788; rt=9.53299)**  
T/S Cluster: L-9.5-5

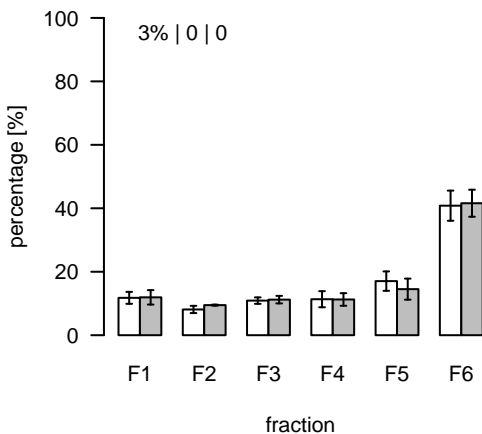

**L1896 (m/z=772.597402; rt=9.5609)**  
T/S Cluster: L-9.6-1

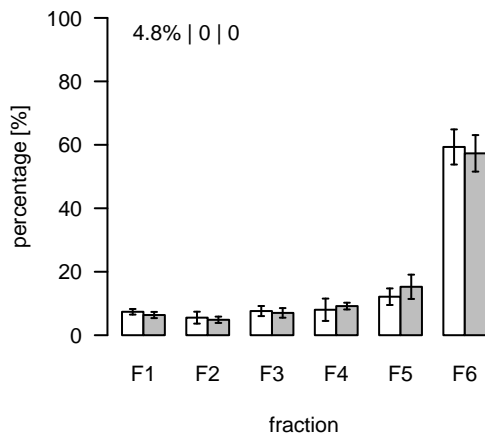

**L1897 (m/z=773.601941; rt=9.56104)**  
T/S Cluster: L-9.6-1

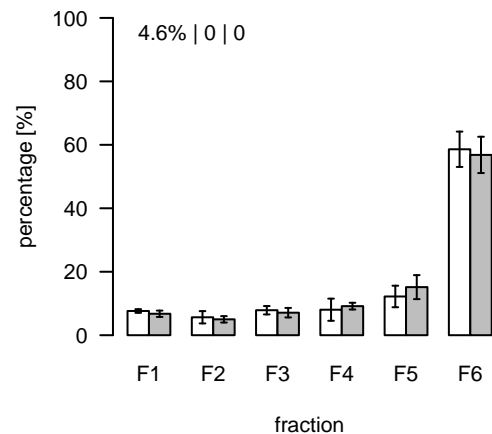

**L1891 (m/z=772.559599; rt=9.56004)**  
T/S Cluster: L-9.6-1

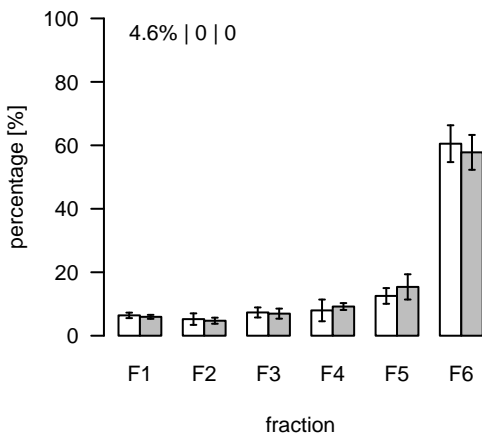

**L1892 (m/z=777.556634; rt=9.56032)**  
T/S Cluster: L-9.6-1

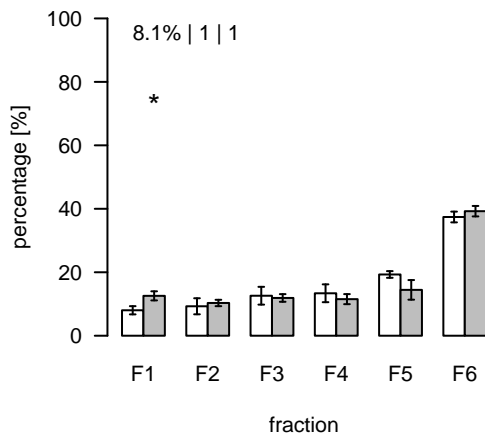

**L1894 (m/z=773.573388; rt=9.56065)**  
T/S Cluster: L-9.6-1

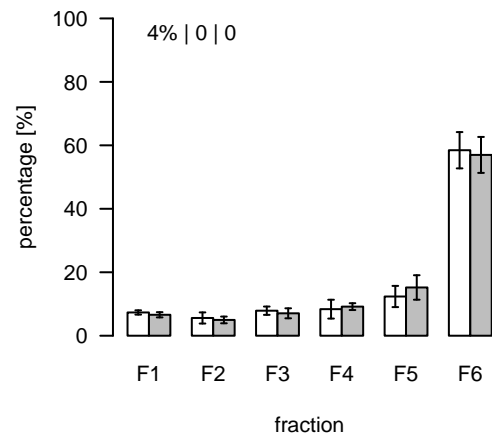

**L1890 (m/z=777.53499; rt=9.55914)**  
T/S Cluster: L-9.6-1

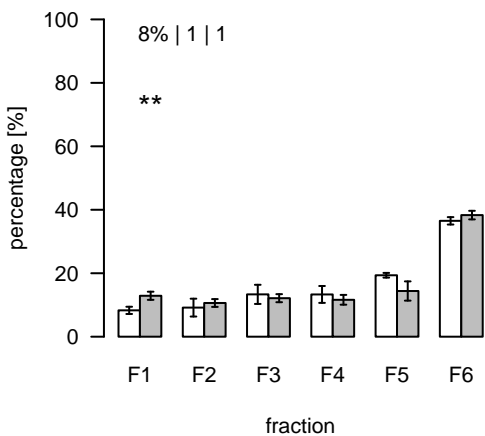

**L1942 (m/z=891.531148; rt=9.64419)**  
T/S Cluster: L-9.6-1

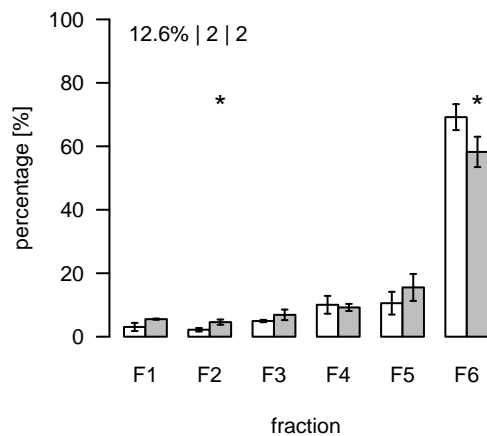

**L1898 (m/z=774.6045; rt=9.56115)**  
T/S Cluster: L-9.6-1

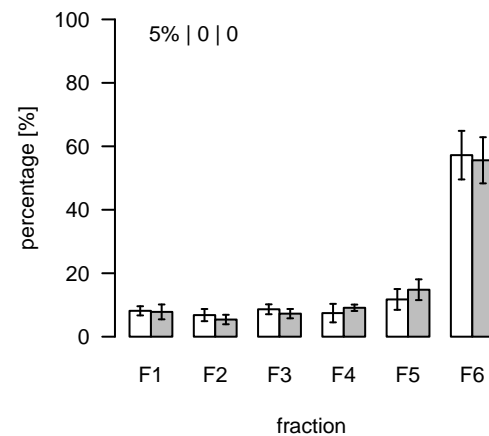

**L1900 (m/z=386.303392; rt=9.56233)**  
T/S Cluster: L-9.6-1

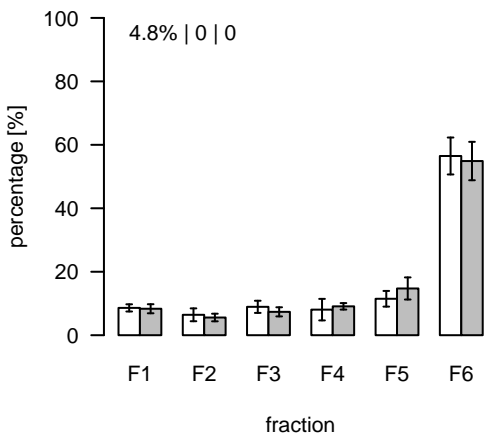

**L1899 (m/z=386.297588; rt=9.56175)**  
T/S Cluster: L-9.6-1

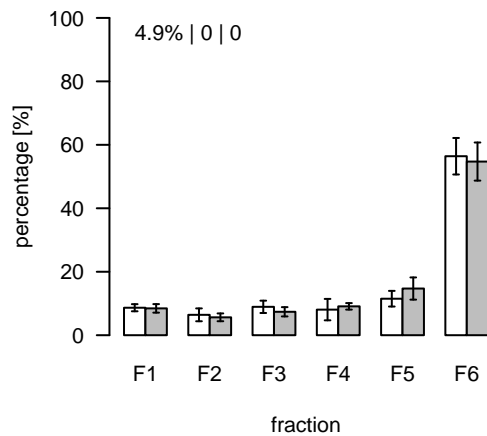

**L1943 (m/z=891.494307; rt=9.64525)**  
T/S Cluster: L-9.6-1

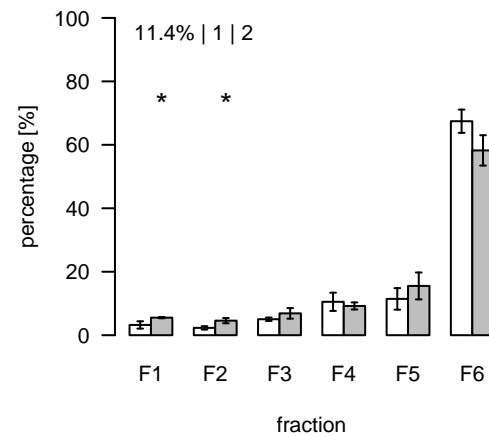

**L1893 (m/z=778.55665; rt=9.56058)**  
T/S Cluster: L-9.6-1

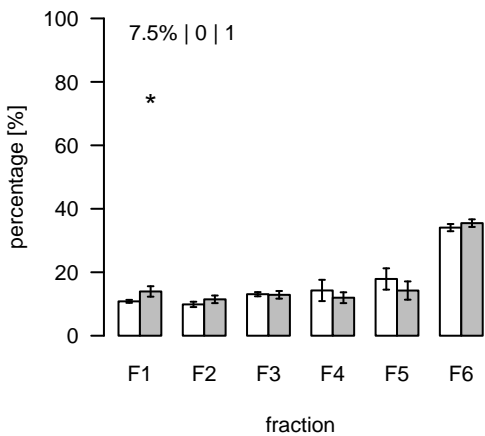

**L1895 (m/z=774.576317; rt=9.56067)**  
T/S Cluster: L-9.6-1

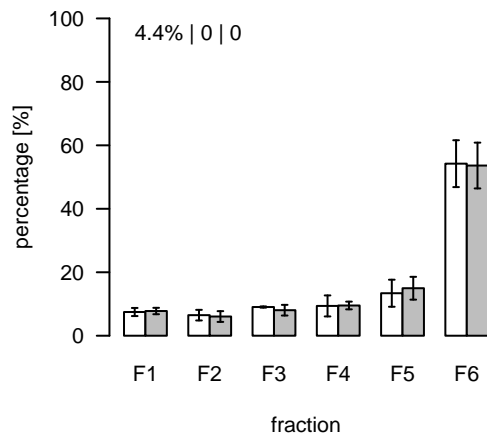

**L1941 (m/z=892.534491; rt=9.64409)**  
T/S Cluster: L-9.6-1

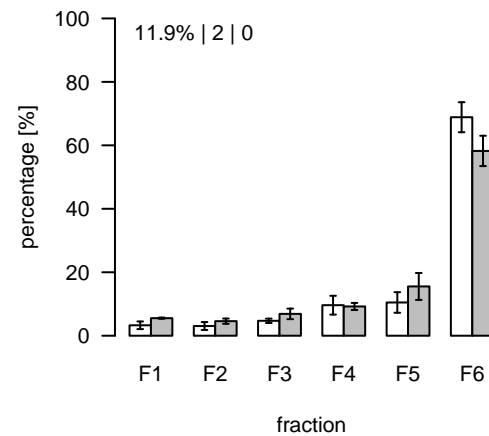

**L1902 (m/z=885.559572; rt=9.5775)**  
T/S Cluster: L-9.6-2

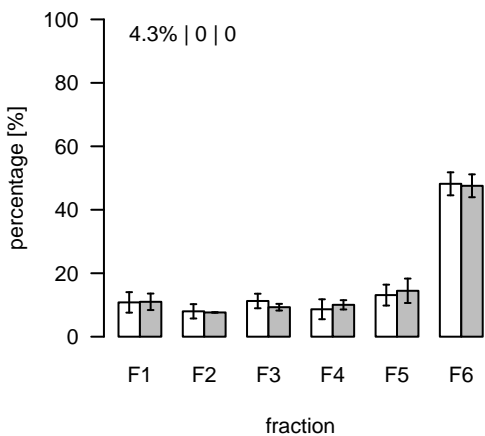

**L1905 (m/z=887.573856; rt=9.58475)**  
T/S Cluster: L-9.6-2

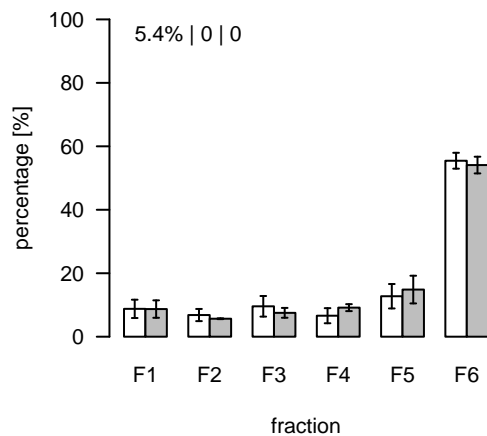

**L1904 (m/z=887.543931; rt=9.58448)**  
T/S Cluster: L-9.6-2

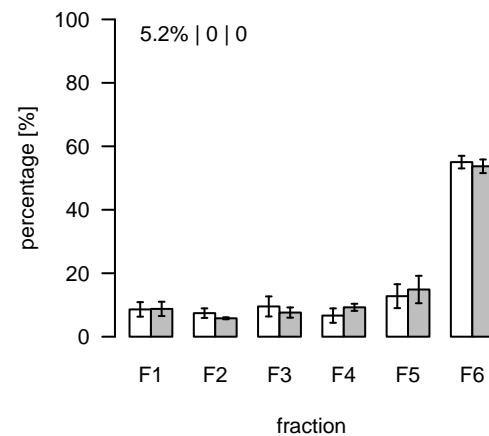

**L1906 (m/z=888.577914; rt=9.58491)**  
T/S Cluster: L-9.6-2

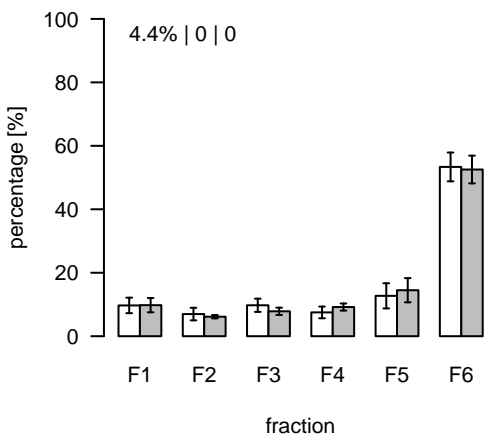

**L1901 (m/z=885.527552; rt=9.57692)**  
T/S Cluster: L-9.6-2

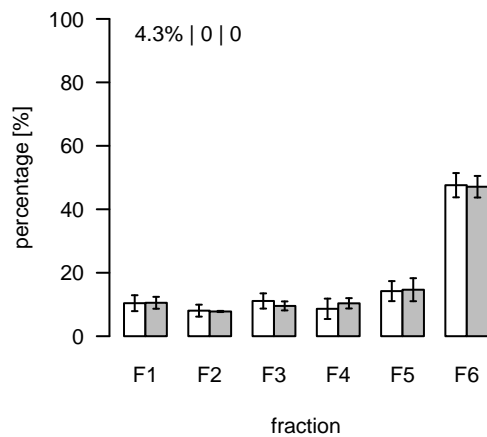

**L1907 (m/z=888.555099; rt=9.58502)**  
T/S Cluster: L-9.6-2

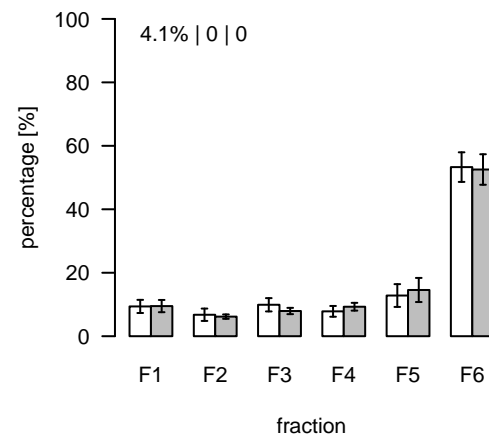

**L1903 (m/z=886.561762; rt=9.57775)**  
T/S Cluster: L-9.6-2

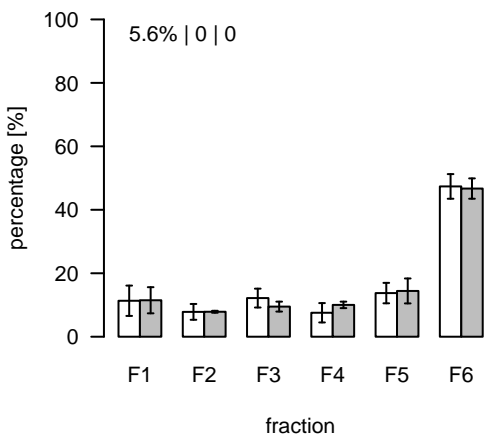

**L1922 (m/z=760.587735; rt=9.59716)**  
T/S Cluster: L-9.6-3

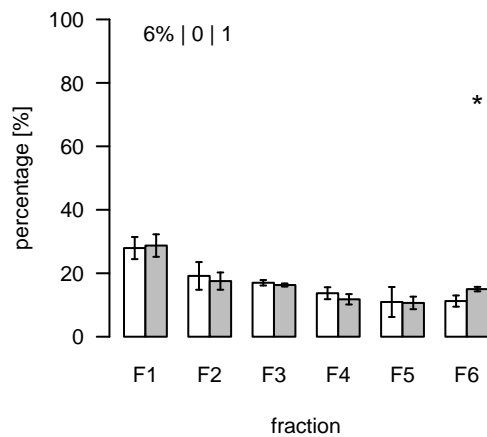

**L1918 (m/z=761.592184; rt=9.59703)**  
T/S Cluster: L-9.6-3

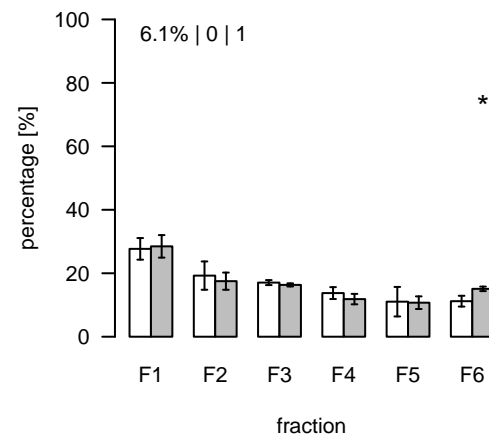

**L1925 (m/z=380.295113; rt=9.5972)**  
T/S Cluster: L-9.6-3

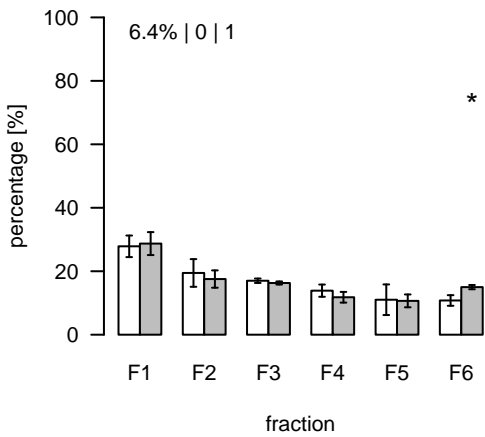

**L1913 (m/z=762.596653; rt=9.59694)**  
T/S Cluster: L-9.6-3

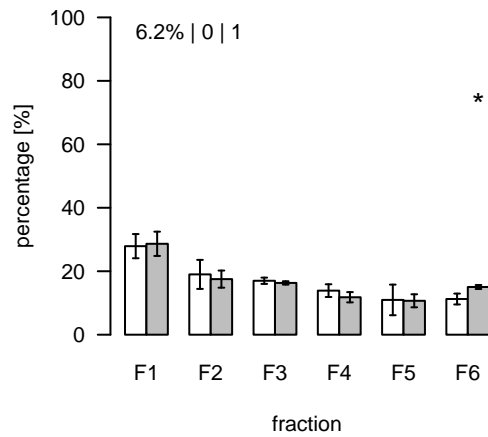

**L1921 (m/z=762.568967; rt=9.59713)**  
T/S Cluster: L-9.6-3

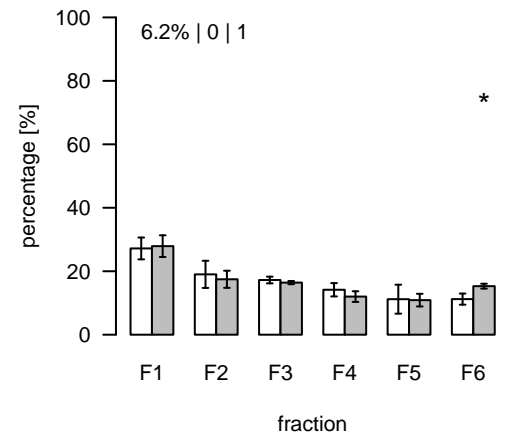

**L1932 (m/z=782.573348; rt=9.59834)**  
T/S Cluster: L-9.6-3

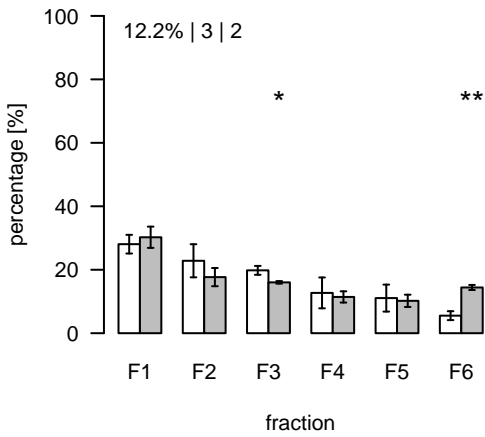

**L1915 (m/z=380.797058; rt=9.59703)**  
T/S Cluster: L-9.6-3

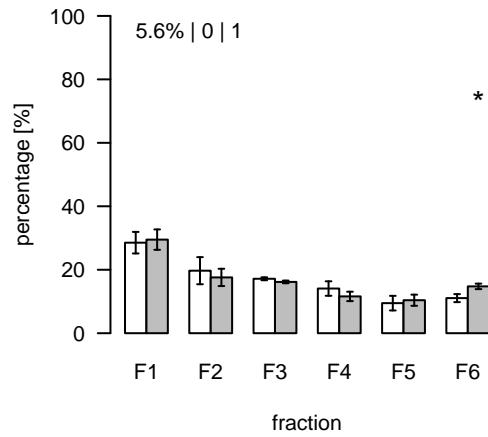

**L1912 (m/z=761.536621; rt=9.59688)**  
T/S Cluster: L-9.6-3

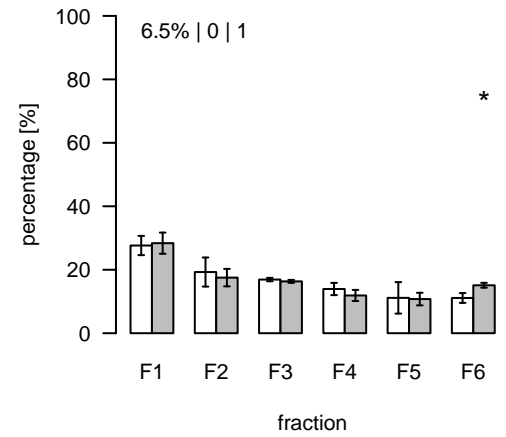

**L1923 (m/z=253.532878; rt=9.59718)**  
T/S Cluster: L-9.6-3

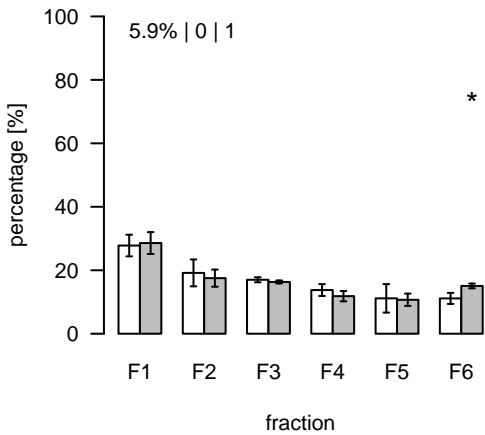

**L1933 (m/z=782.548166; rt=9.59856)**  
T/S Cluster: L-9.6-3

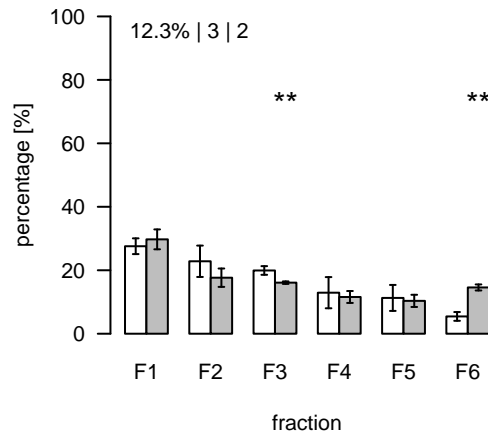

**L1934 (m/z=783.578303; rt=9.5986)**  
T/S Cluster: L-9.6-3

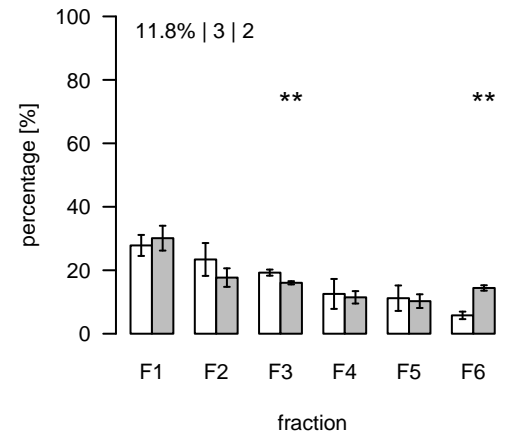

**L1935 (m/z=783.557531; rt=9.59878)**  
T/S Cluster: L-9.6-3

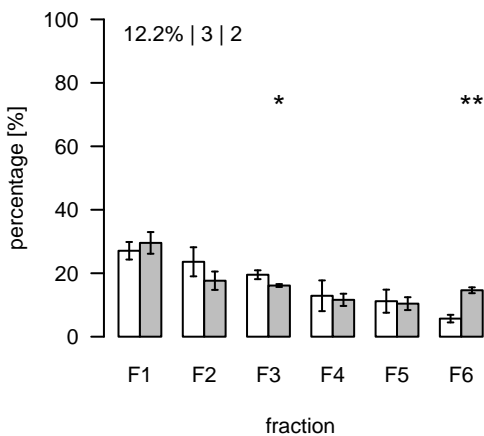

**L1920 (m/z=763.602595; rt=9.59713)**  
T/S Cluster: L-9.6-3

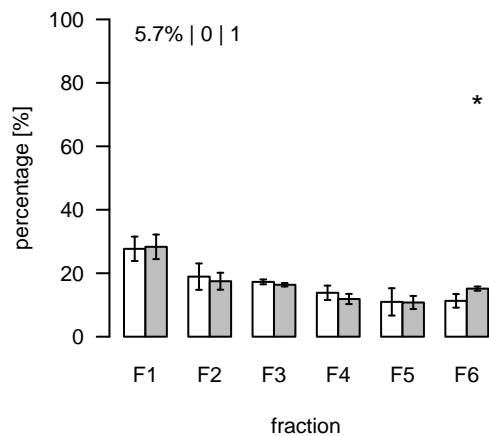

**L1929 (m/z=763.583046; rt=9.5974)**  
T/S Cluster: L-9.6-3

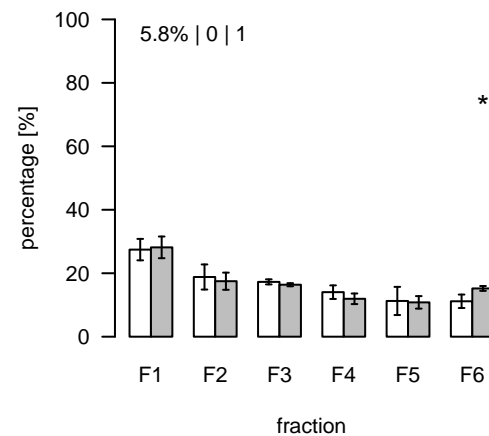

**L1919 (m/z=253.867624; rt=9.59705)**  
T/S Cluster: L-9.6-3

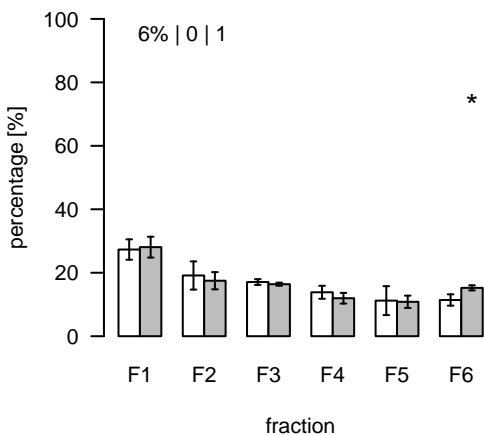

**L1930 (m/z=253.527468; rt=9.59754)**  
T/S Cluster: L-9.6-3

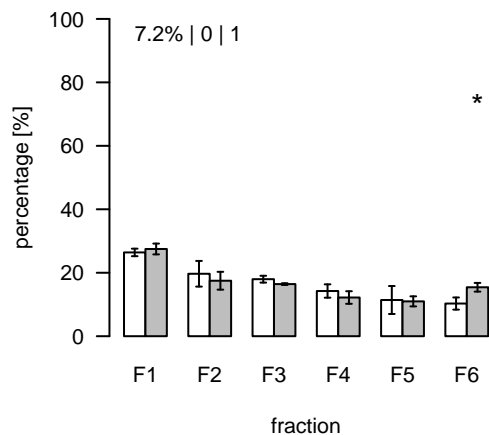

**L1917 (m/z=381.297441; rt=9.59703)**  
T/S Cluster: L-9.6-3

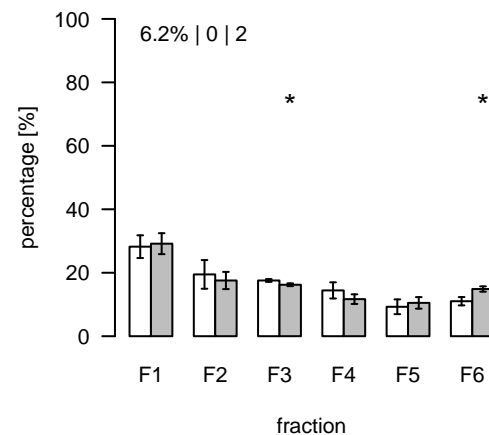

**L1911 (m/z=381.303335; rt=9.59667)**  
T/S Cluster: L-9.6-3

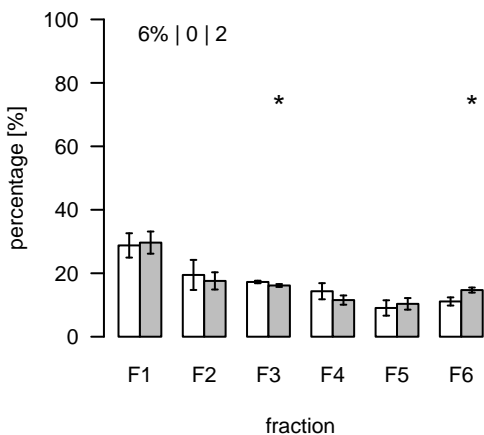

**L1928 (m/z=380.7844; rt=9.59738)**  
T/S Cluster: L-9.6-3

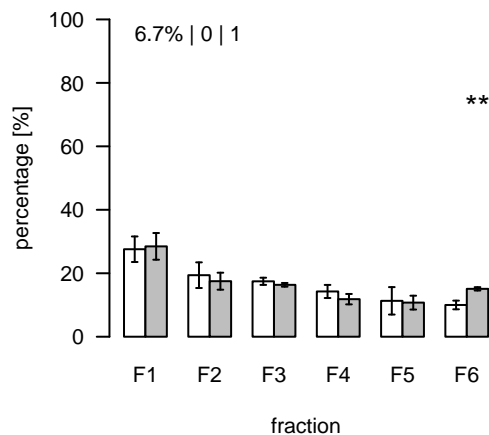

**L1926 (m/z=253.863236; rt=9.59725)**  
T/S Cluster: L-9.6-3

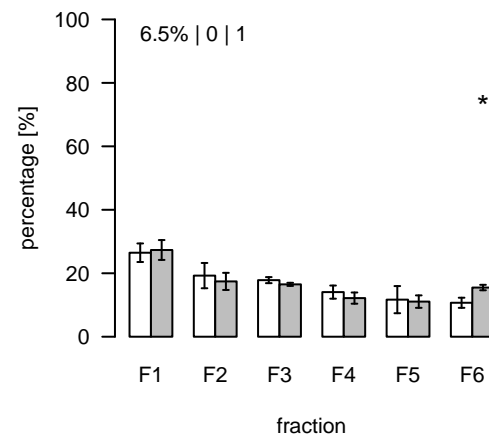

**L1908 (m/z=391.283613; rt=9.59492)**  
T/S Cluster: L-9.6-3

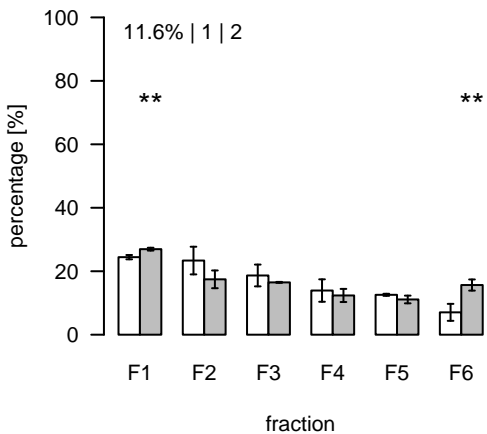

**L1909 (m/z=391.290706; rt=9.59551)**  
T/S Cluster: L-9.6-3

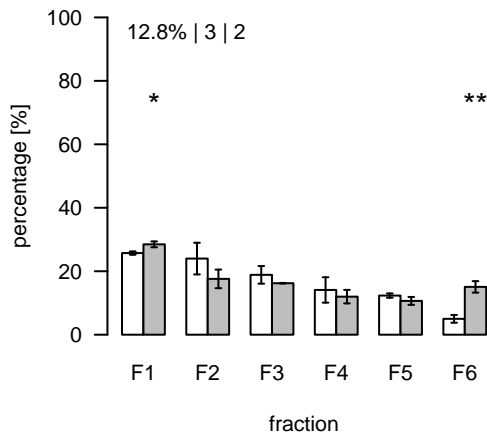

**L1914 (m/z=380.278221; rt=9.59695)**  
T/S Cluster: L-9.6-3

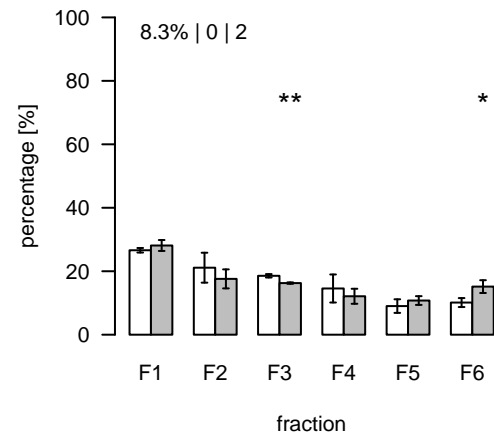

**L1931 (m/z=798.546837; rt=9.59775)**  
T/S Cluster: L-9.6-3

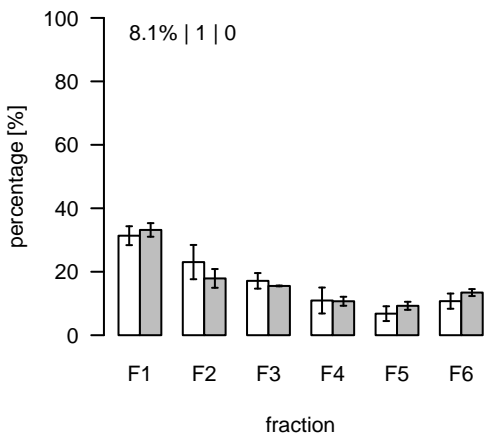

**L1916 (m/z=190.147171; rt=9.59703)**  
T/S Cluster: L-9.6-3

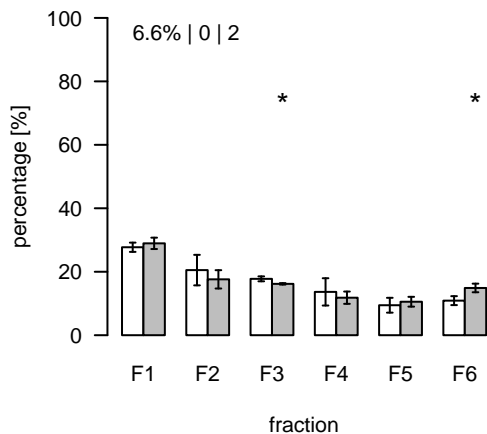

**L1924 (m/z=190.150132; rt=9.59718)**  
T/S Cluster: L-9.6-3

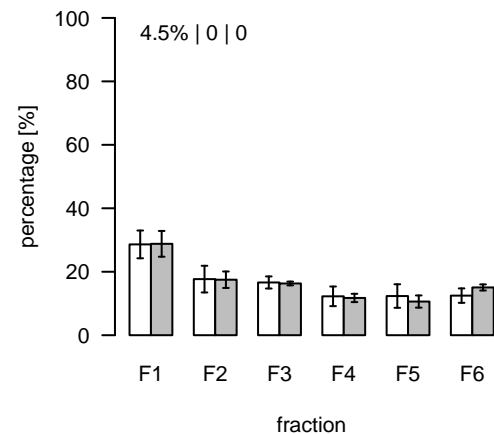

**L1910 (m/z=254.202164; rt=9.59662)**  
T/S Cluster: L-9.6-3

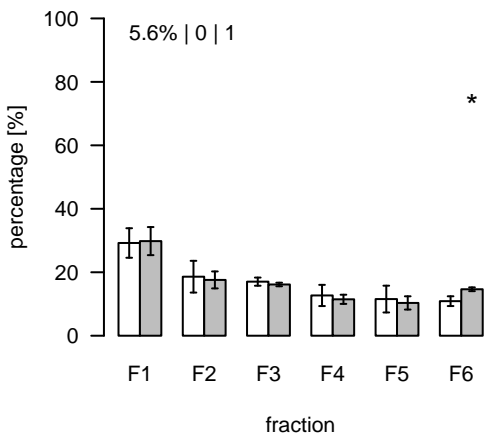

**L1927 (m/z=761.673501; rt=9.59737)**  
T/S Cluster: L-9.6-3

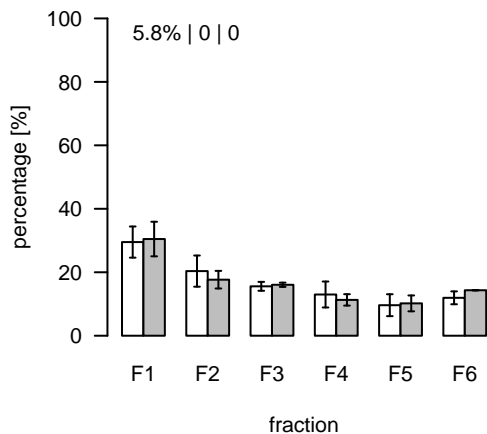

**L1936 (m/z=798.582547; rt=9.61291)**  
T/S Cluster: L-9.6-4

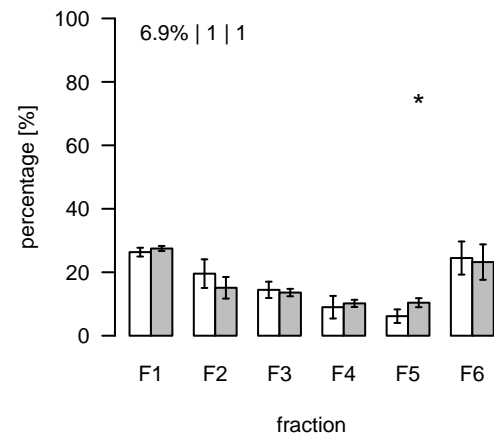

**L1938 (m/z=910.550883; rt=9.61903)**  
T/S Cluster: L-9.6-5

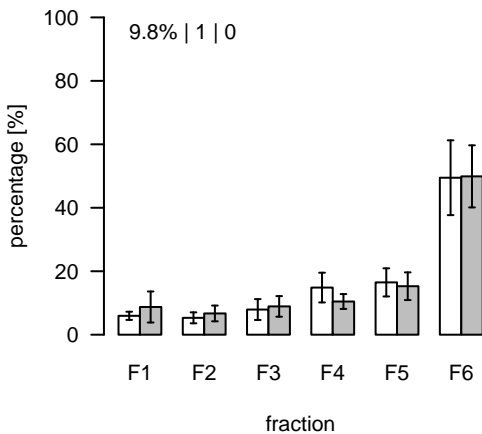

**L1940 (m/z=911.54772; rt=9.62003)**  
T/S Cluster: L-9.6-5

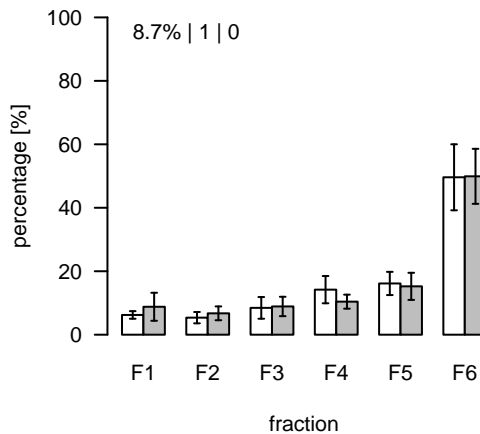

**L1937 (m/z=910.613536; rt=9.61509)**  
T/S Cluster: L-9.6-5

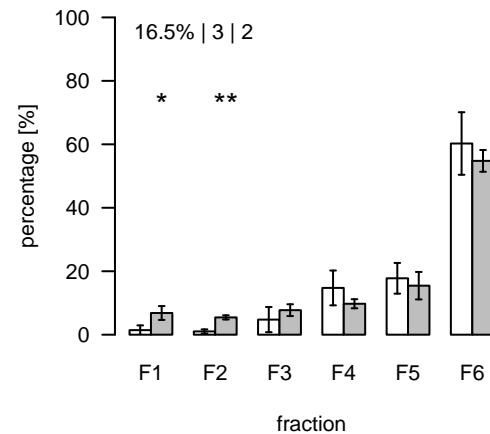

**L1939 (m/z=912.547638; rt=9.61986)**  
T/S Cluster: L-9.6-5

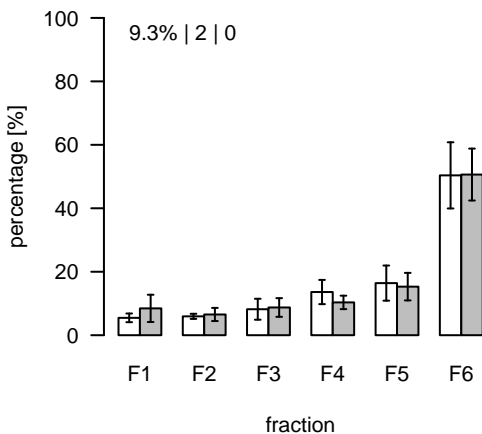

**L1944 (m/z=903.569014; rt=9.64593)**  
T/S Cluster: L-9.6-6

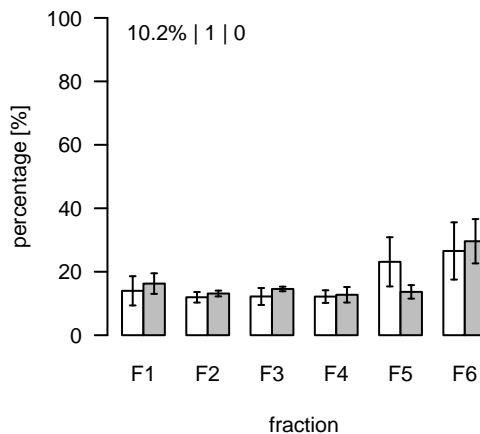

**L1948 (m/z=760.588111; rt=9.65137)**  
T/S Cluster: L-9.7-1

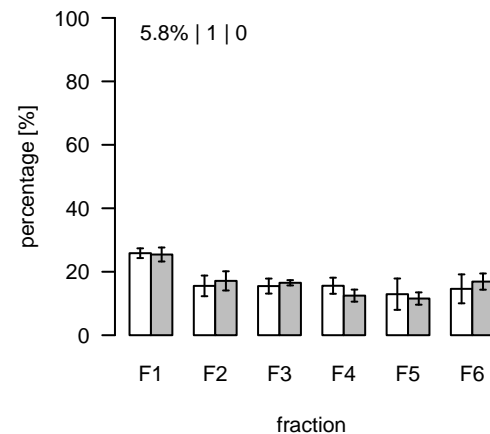

**L1950 (m/z=761.555907; rt=9.65146)**  
T/S Cluster: L-9.7-1

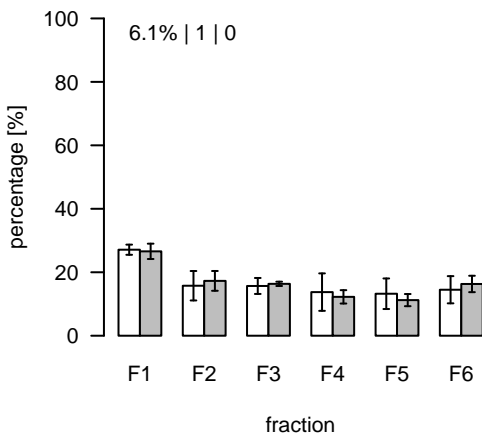

**L1949 (m/z=380.794792; rt=9.65142)**  
T/S Cluster: L-9.7-1

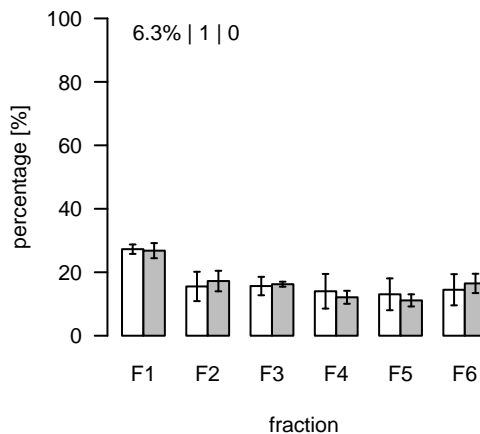

**L1952 (m/z=763.598407; rt=9.65231)**  
T/S Cluster: L-9.7-1

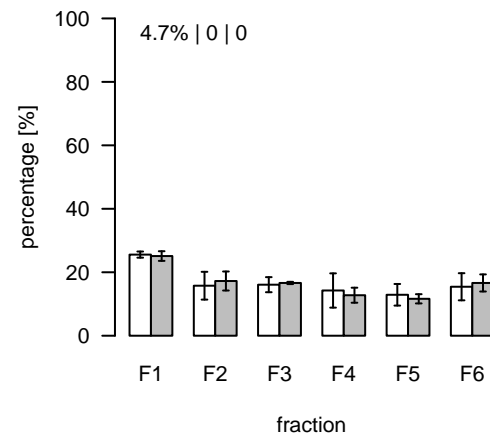

**L1946 (m/z=253.867435; rt=9.65112)**  
T/S Cluster: L-9.7-1

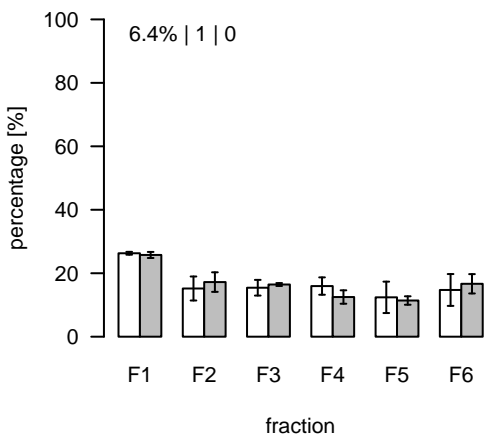

**L1945 (m/z=381.298183; rt=9.6509)**  
T/S Cluster: L-9.7-1

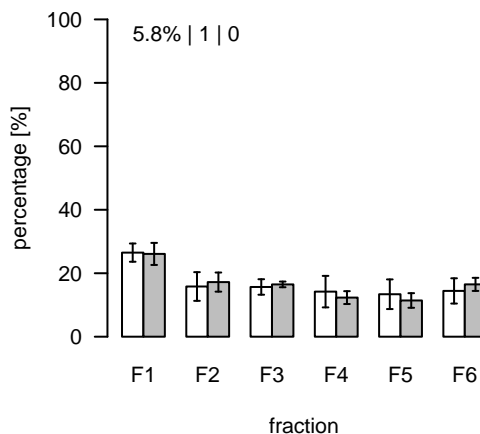

**L1947 (m/z=910.552817; rt=9.65113)**  
T/S Cluster: L-9.7-2

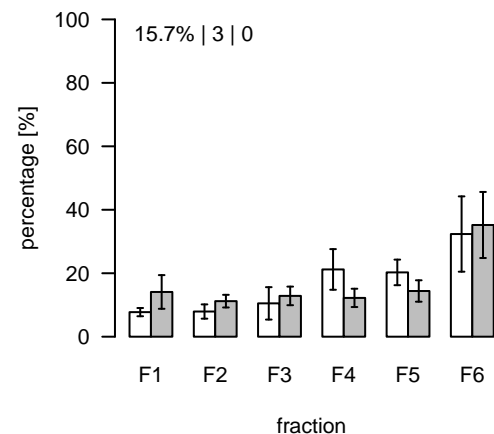

**L1954 (m/z=911.547549; rt=9.65304)**  
T/S Cluster: L-9.7-2

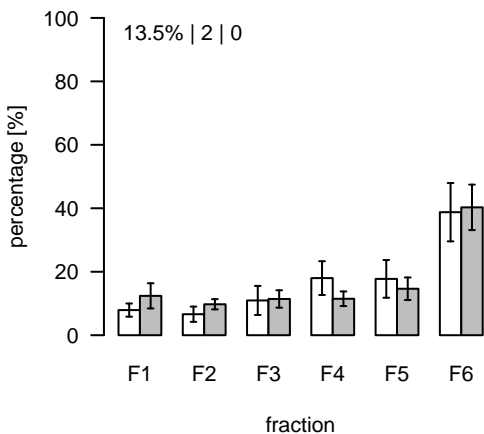

**L1951 (m/z=782.570671; rt=9.65186)**  
T/S Cluster: L-9.7-3

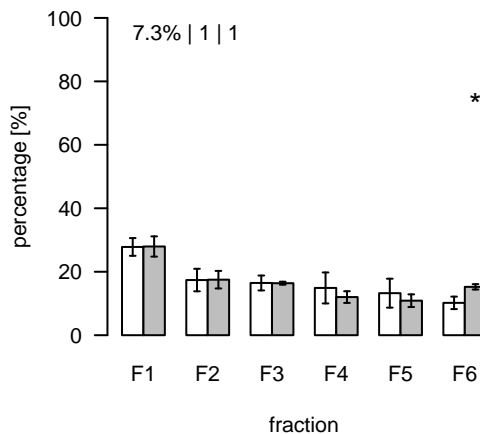

**L1953 (m/z=783.57385; rt=9.65267)**  
T/S Cluster: L-9.7-3

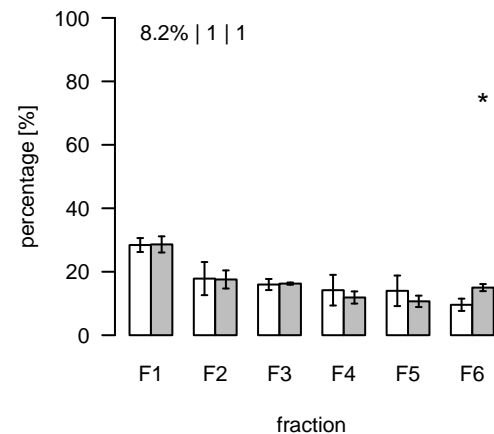

**L1962 (m/z=786.604757; rt=9.82717)**  
T/S Cluster: L-9.8-1

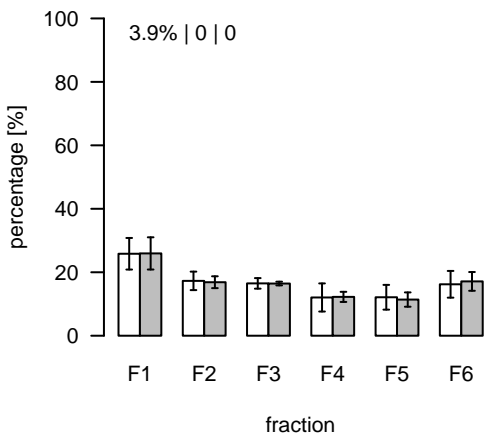

**L1960 (m/z=786.574916; rt=9.8271)**  
T/S Cluster: L-9.8-1

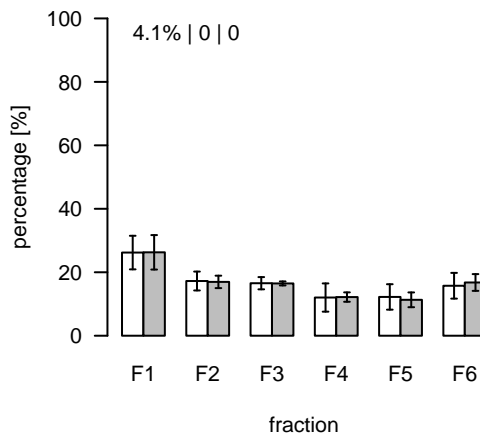

**L1959 (m/z=787.608399; rt=9.82709)**  
T/S Cluster: L-9.8-1

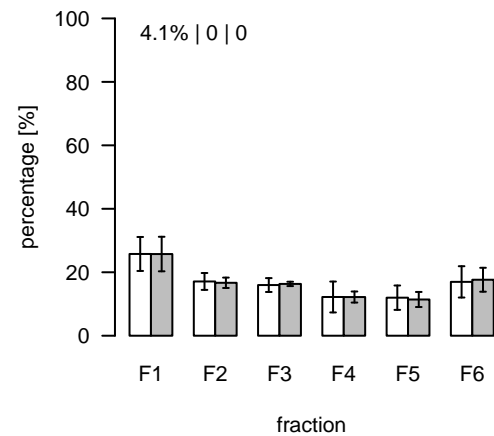



**L1958 (m/z=787.580218; rt=9.82704)**  
T/S Cluster: L-9.8-1

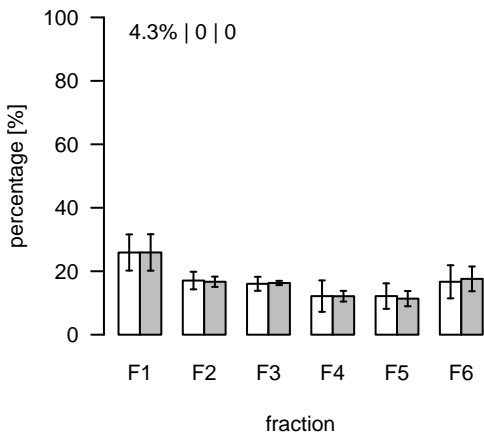

**L1965 (m/z=393.301447; rt=9.82739)**  
T/S Cluster: L-9.8-1

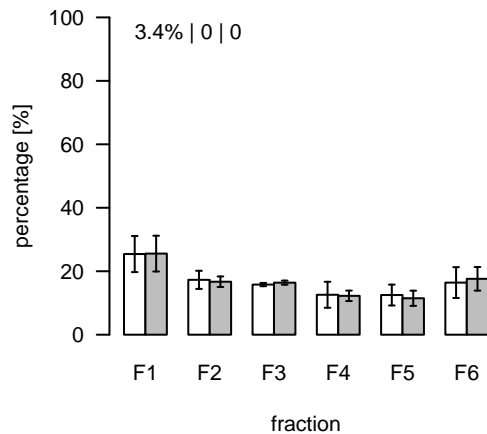

**L1957 (m/z=788.61287; rt=9.82703)**  
T/S Cluster: L-9.8-1

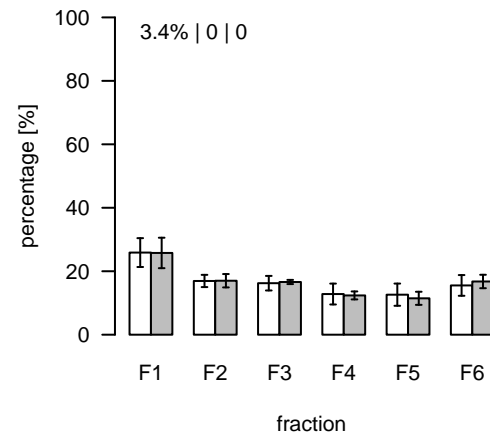

**L1963 (m/z=393.307643; rt=9.82728)**  
T/S Cluster: L-9.8-1

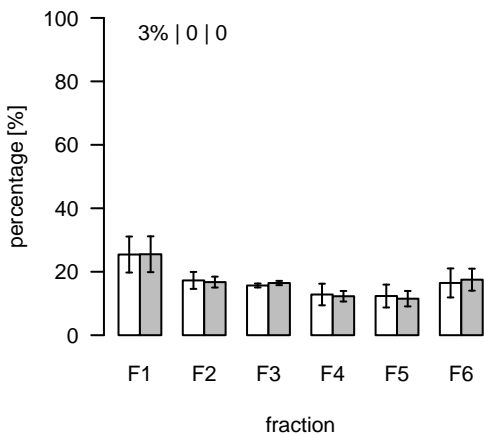

**L1956 (m/z=788.588492; rt=9.82699)**  
T/S Cluster: L-9.8-1

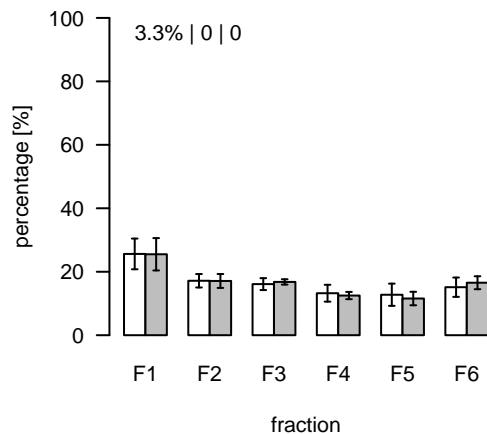

**L1966 (m/z=808.587079; rt=9.82783)**  
T/S Cluster: L-9.8-1

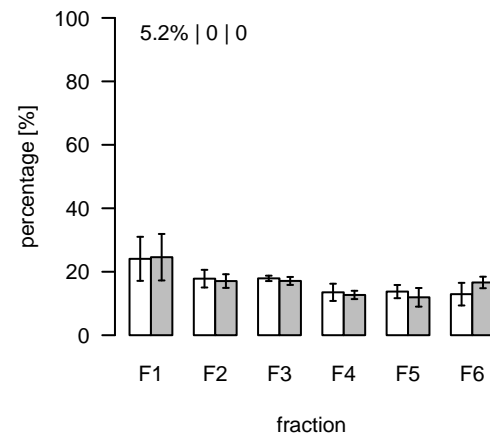

**L1964 (m/z=262.204931; rt=9.82735)**  
T/S Cluster: L-9.8-1

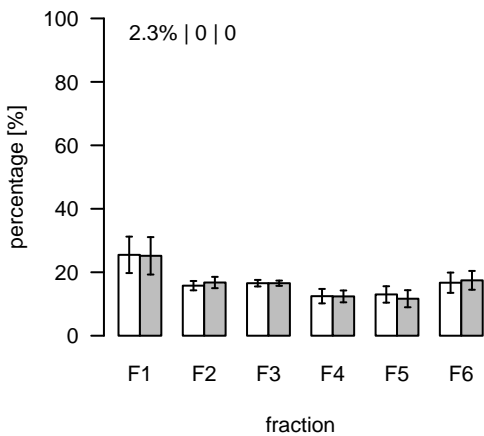

**L1961 (m/z=393.807938; rt=9.82711)**  
T/S Cluster: L-9.8-1

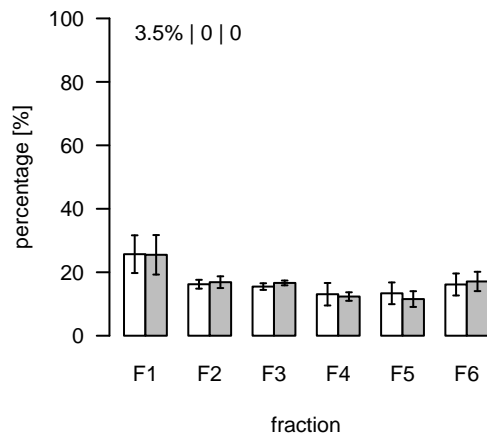

**L1955 (m/z=393.801359; rt=9.82689)**  
T/S Cluster: L-9.8-1

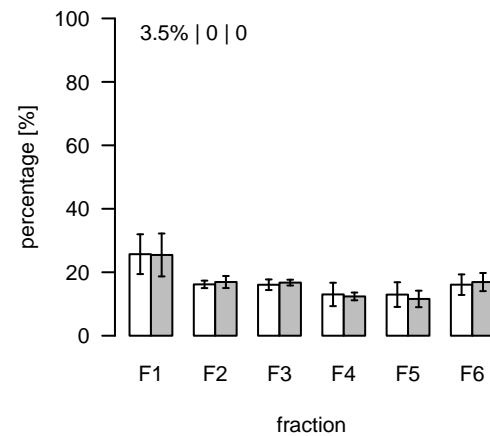

**L1968 (m/z=887.575383; rt=9.87596)**  
T/S Cluster: L-9.9-1

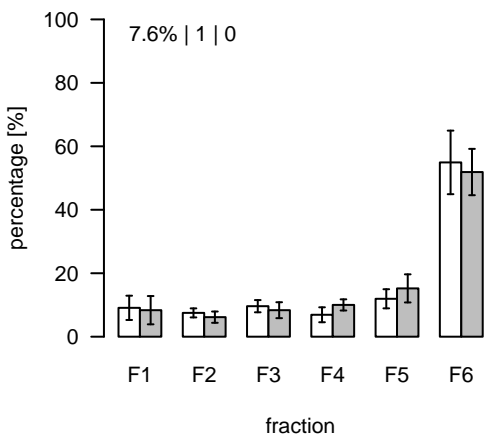

**L1967 (m/z=887.543872; rt=9.87559)**  
T/S Cluster: L-9.9-1

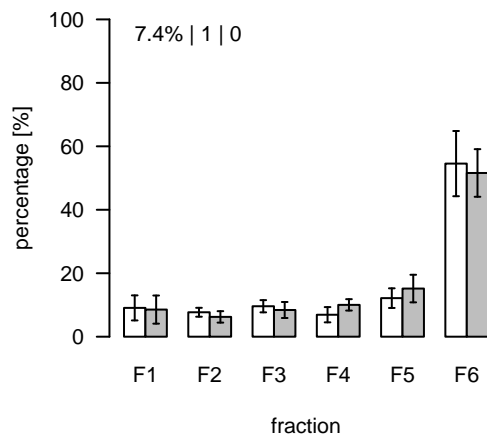

**L1969 (m/z=888.576991; rt=9.87694)**  
T/S Cluster: L-9.9-1

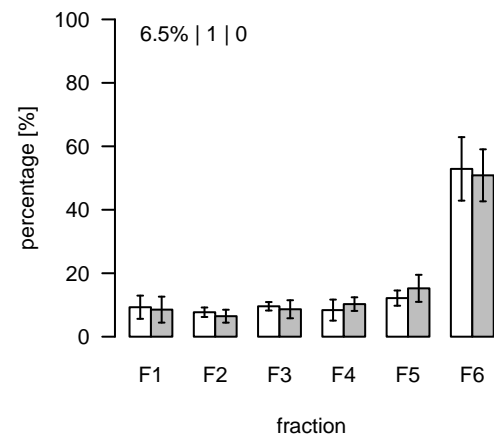

**L1970 (m/z=888.554108; rt=9.87704)**  
T/S Cluster: L-9.9-1

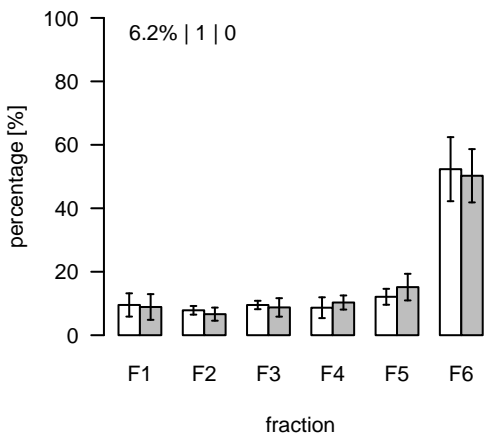

**L1971 (m/z=889.587129; rt=9.87945)**  
T/S Cluster: L-9.9-1

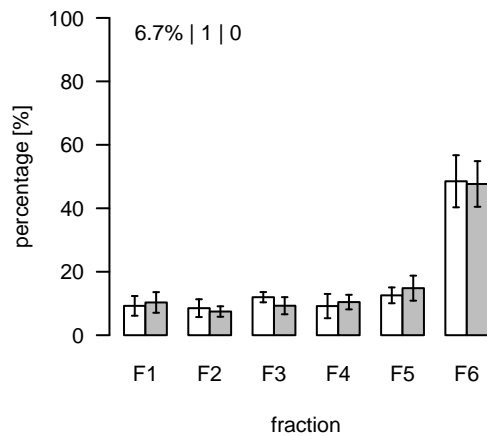

**L1972 (m/z=889.566901; rt=9.87983)**  
T/S Cluster: L-9.9-1

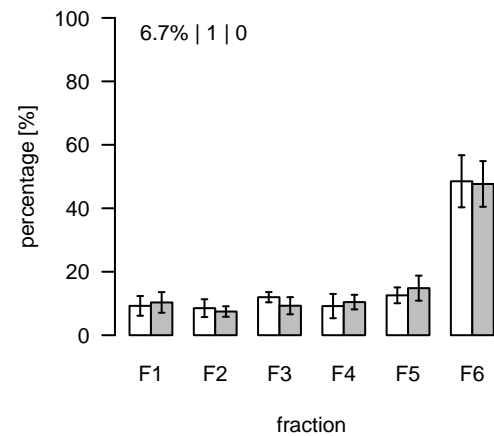

**L1974 (m/z=907.525651; rt=9.87991)**  
T/S Cluster: L-9.9-2

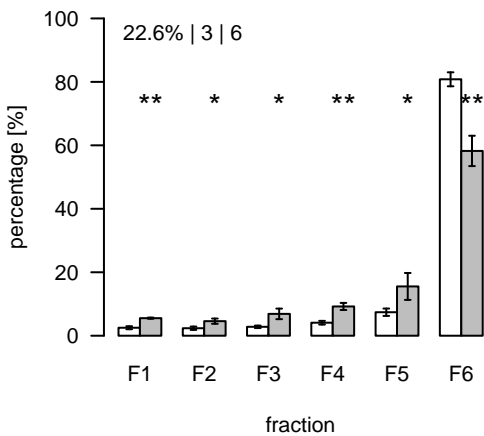

**L1977 (m/z=907.487693; rt=9.88116)**  
T/S Cluster: L-9.9-2

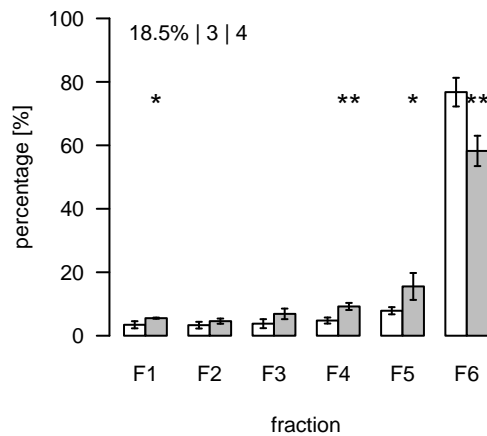

**L1976 (m/z=908.503173; rt=9.88073)**  
T/S Cluster: L-9.9-2

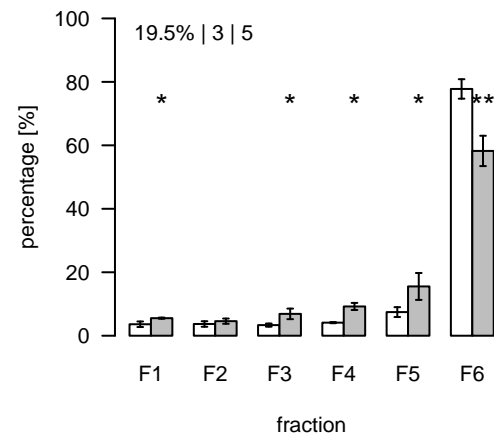

**L1973 (m/z=908.532285; rt=9.87985)**  
T/S Cluster: L-9.9-2

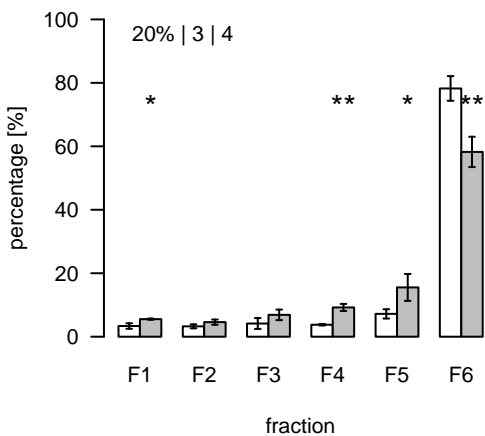

**L1975 (m/z=908.528529; rt=9.87999)**  
T/S Cluster: L-9.9-2

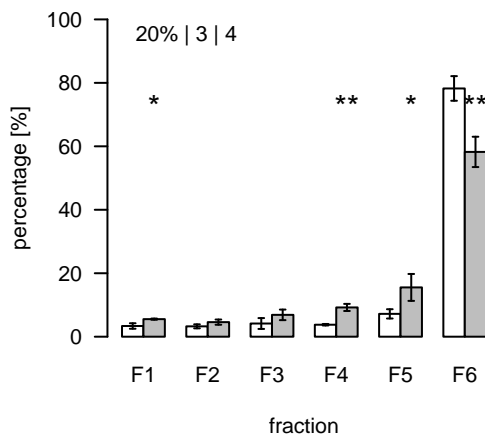

**L1979 (m/z=909.532741; rt=9.89855)**  
T/S Cluster: L-9.9-2

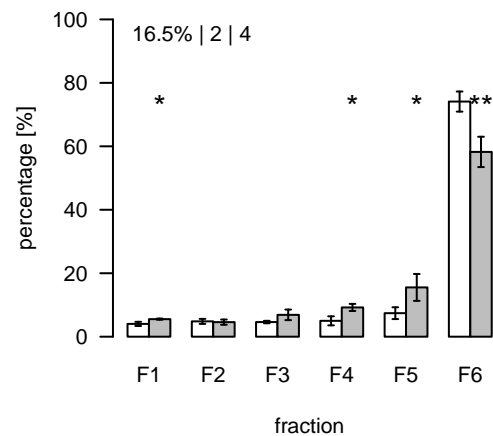

**L1978 (m/z=909.504533; rt=9.89117)**  
T/S Cluster: L-9.9-2

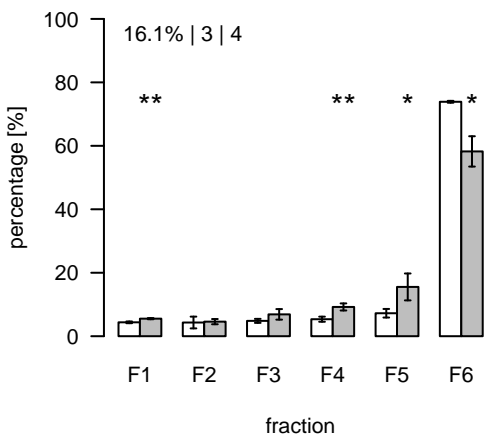

**L1980 (m/z=812.620139; rt=9.9512)**  
T/S Cluster: L-10-1

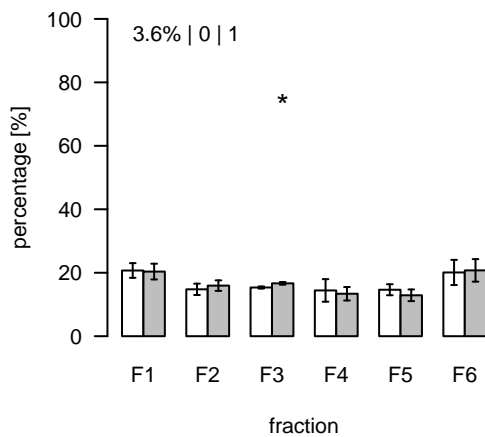

**L1986 (m/z=903.568857; rt=10.00218)**  
T/S Cluster: L-10-2

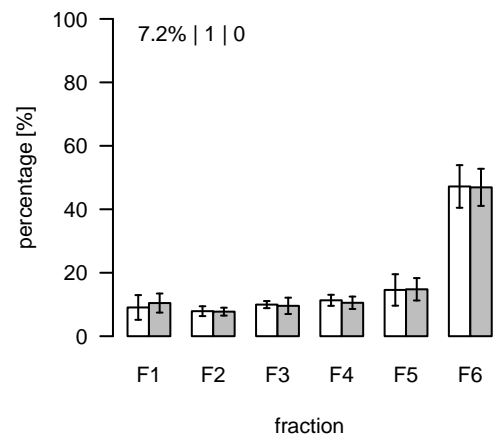

**L1985 (m/z=903.533548; rt=10.0018)**  
T/S Cluster: L-10-2

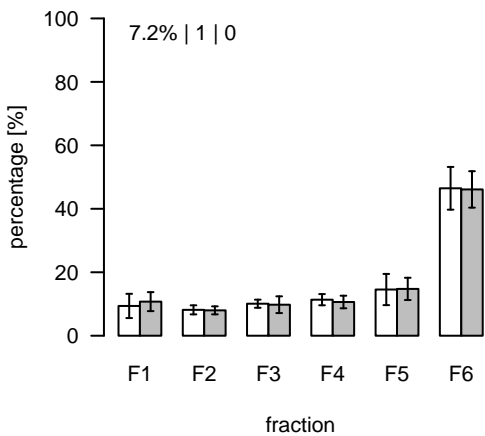

**L1984 (m/z=904.574378; rt=10.00139)**  
T/S Cluster: L-10-2

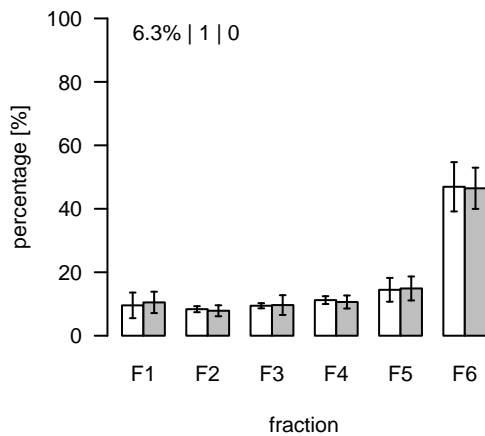

**L1983 (m/z=904.542294; rt=10.00108)**  
T/S Cluster: L-10-2

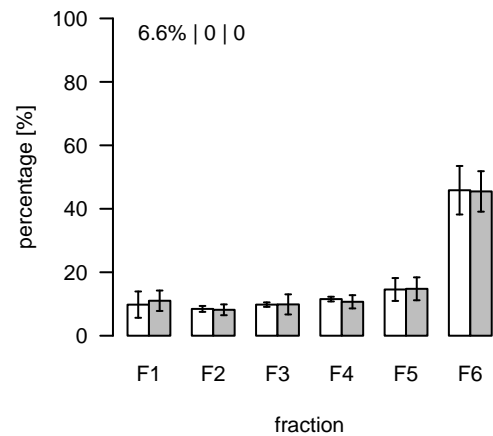

**L1981 (m/z=904.570303; rt=9.97411)**  
T/S Cluster: L-10-2

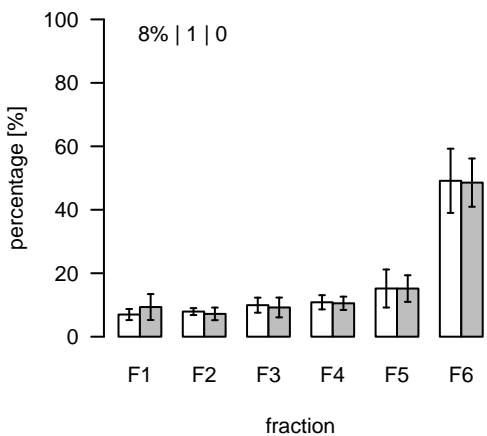

**L1982 (m/z=437.735352; rt=9.99595)**  
T/S Cluster: L-10-3

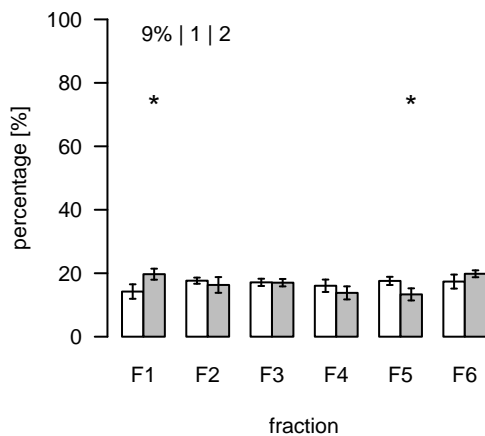

**L1987 (m/z=923.554724; rt=10.03938)**  
T/S Cluster: L-10-4

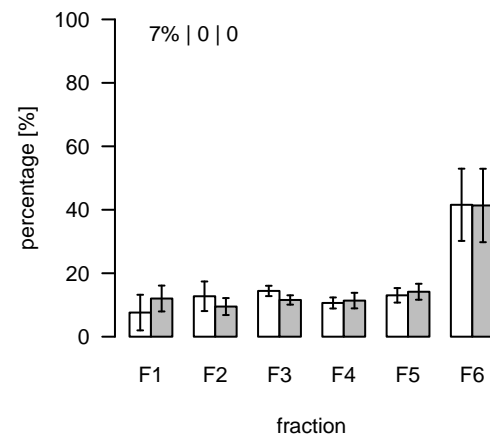

**L1988 (m/z=761.595349; rt=10.05301)**  
T/S Cluster: L-10.1-1

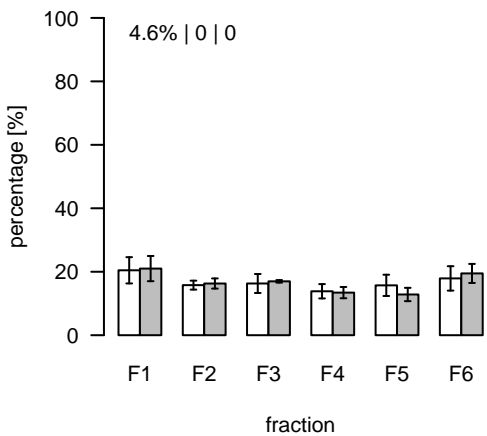

**L1989 (m/z=760.589011; rt=10.05333)**  
T/S Cluster: L-10.1-2

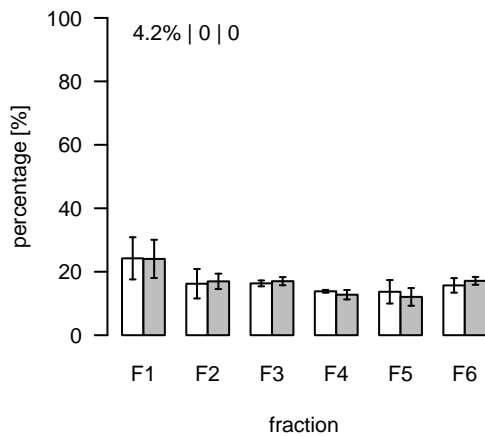

**L1990 (m/z=760.588967; rt=10.05401)**  
T/S Cluster: L-10.1-2

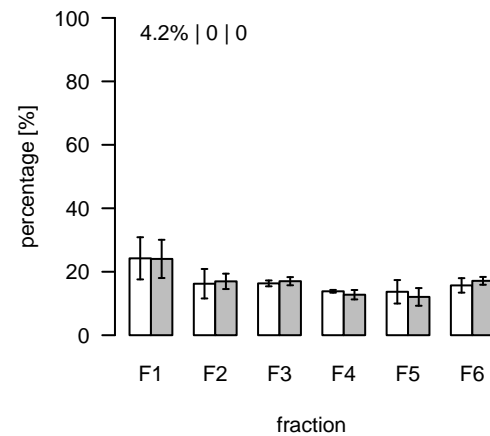

**L1991 (m/z=828.659377; rt=10.05891)**  
T/S Cluster: L-10.1-3

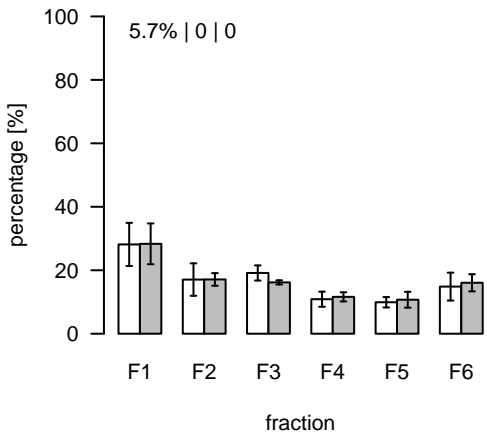

**L1992 (m/z=923.515314; rt=10.0838)**  
T/S Cluster: L-10.1-4

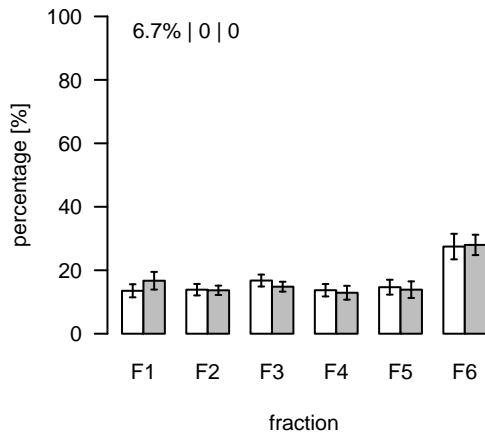

**L1995 (m/z=907.542163; rt=10.08764)**  
T/S Cluster: L-10.1-5

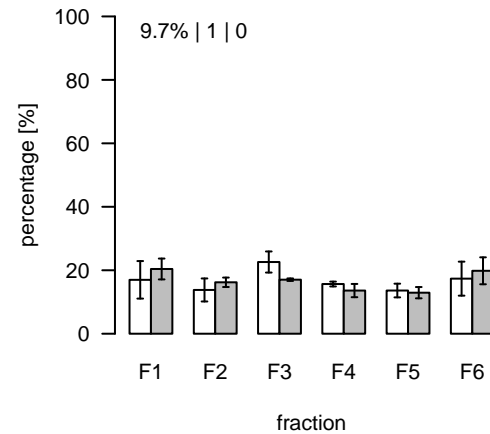

**L1994** (m/z=907.53998; rt=10.08696)  
T/S Cluster: L-10.1-5

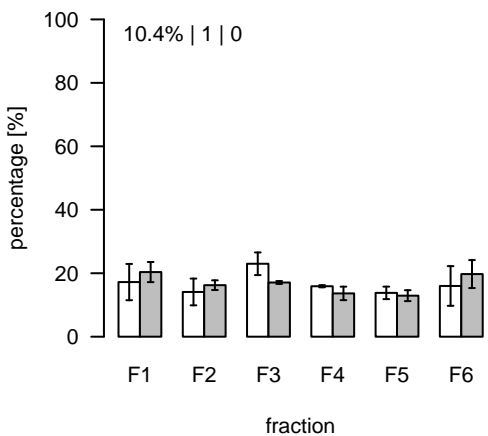

**L1993** (m/z=907.574614; rt=10.08396)  
T/S Cluster: L-10.1-5

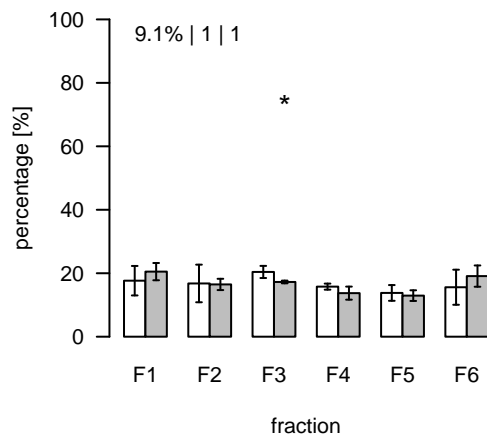

**L2004** (m/z=885.556269; rt=10.09039)  
T/S Cluster: L-10.1-6

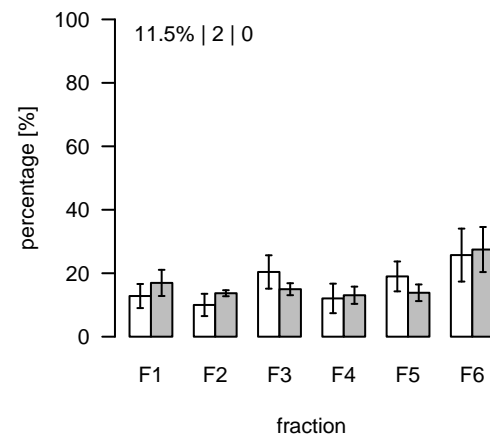

**L2000** (m/z=886.559732; rt=10.09015)  
T/S Cluster: L-10.1-6

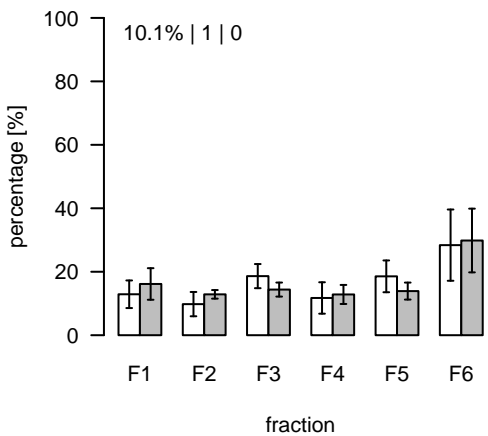

**L1997** (m/z=886.533003; rt=10.08991)  
T/S Cluster: L-10.1-6

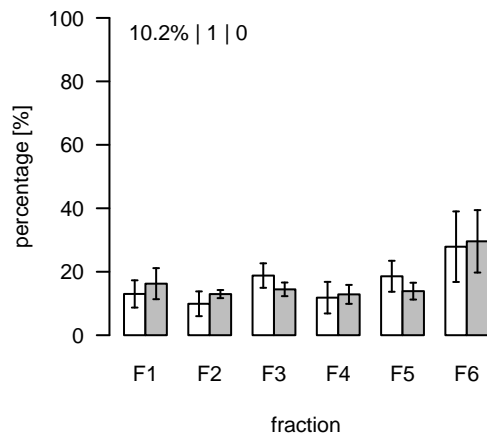

**L2022** (m/z=873.559632; rt=10.11943)  
T/S Cluster: L-10.1-6

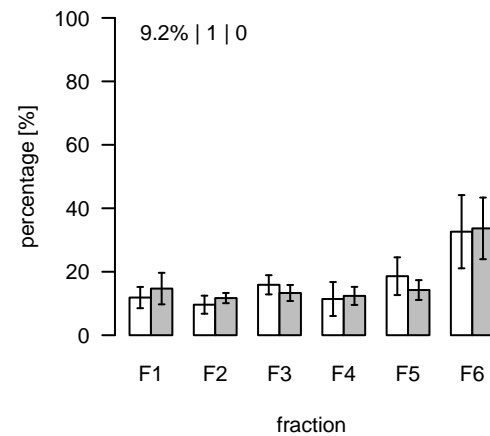

**L2021** (m/z=873.531053; rt=10.11938)  
T/S Cluster: L-10.1-6

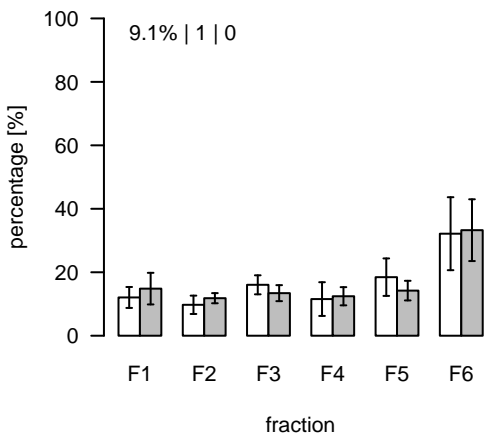

**L1999** (m/z=885.507446; rt=10.09008)  
T/S Cluster: L-10.1-6

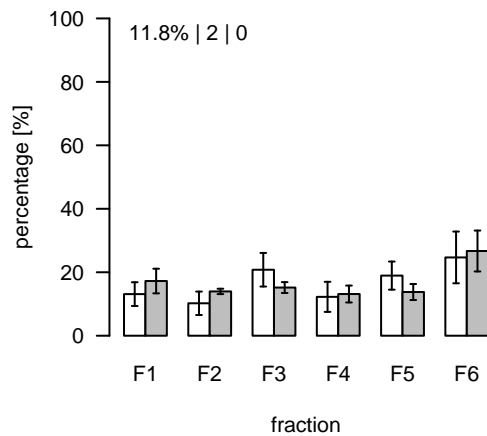

**L2020** (m/z=874.562071; rt=10.11935)  
T/S Cluster: L-10.1-6

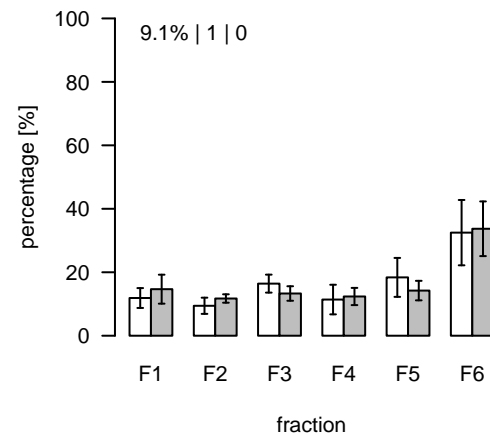

**L2013 (m/z=887.570251; rt=10.10608)**  
T/S Cluster: L-10.1-6

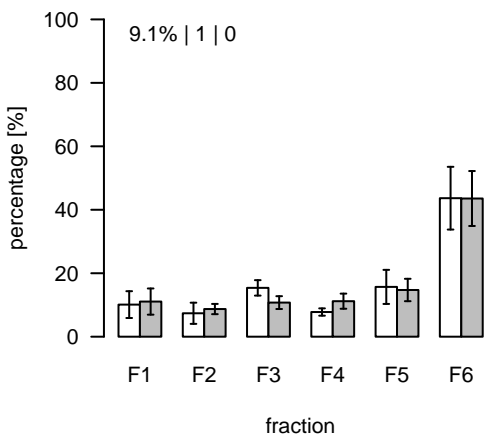

**L2019 (m/z=874.531562; rt=10.11931)**  
T/S Cluster: L-10.1-6

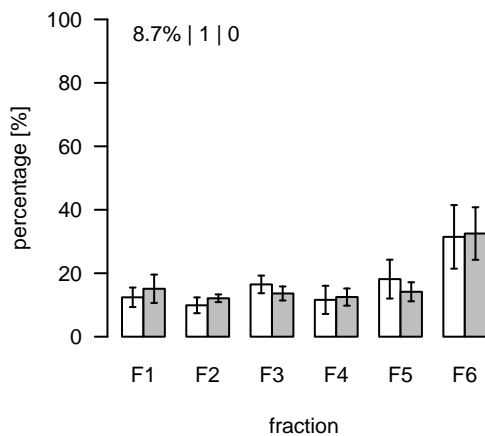

**L2012 (m/z=887.542742; rt=10.10314)**  
T/S Cluster: L-10.1-6

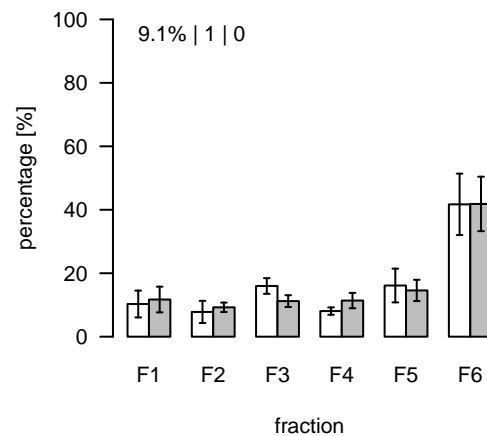

**L2002 (m/z=442.776742; rt=10.0903)**  
T/S Cluster: L-10.1-6

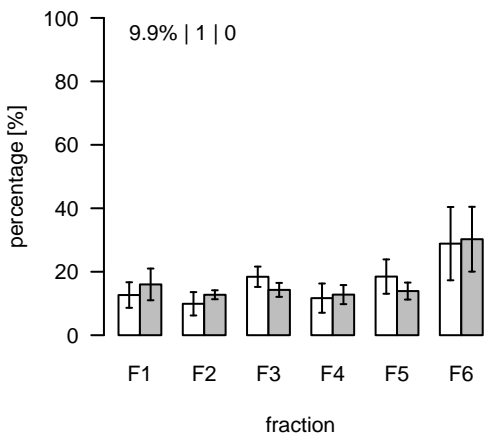

**L2006 (m/z=442.784409; rt=10.09076)**  
T/S Cluster: L-10.1-6

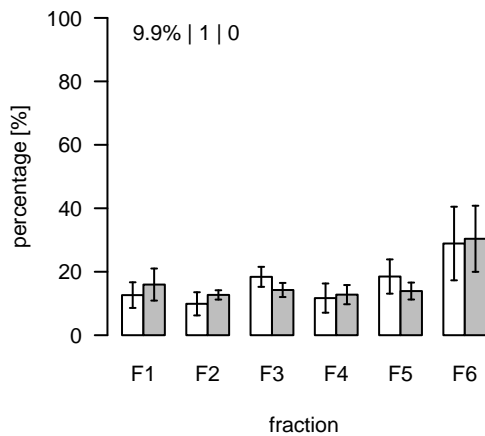

**L2017 (m/z=875.547845; rt=10.11855)**  
T/S Cluster: L-10.1-6

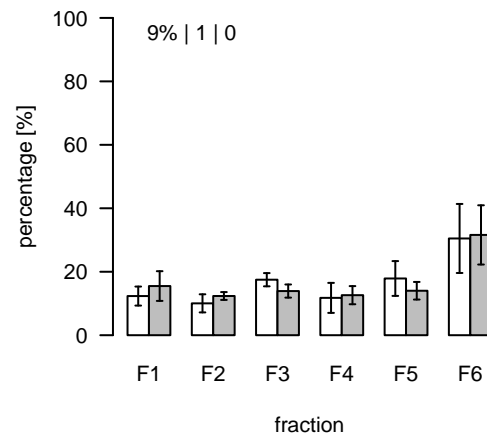

**L2018 (m/z=875.571023; rt=10.11859)**  
T/S Cluster: L-10.1-6

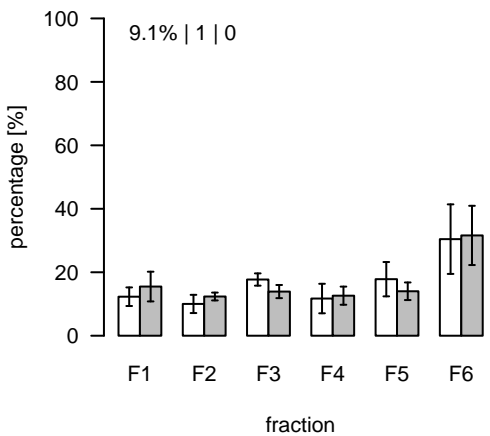

**L2015 (m/z=888.574551; rt=10.11546)**  
T/S Cluster: L-10.1-6

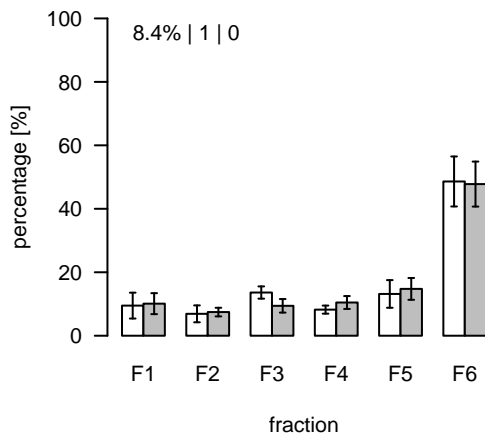

**L2014 (m/z=888.553119; rt=10.11389)**  
T/S Cluster: L-10.1-6

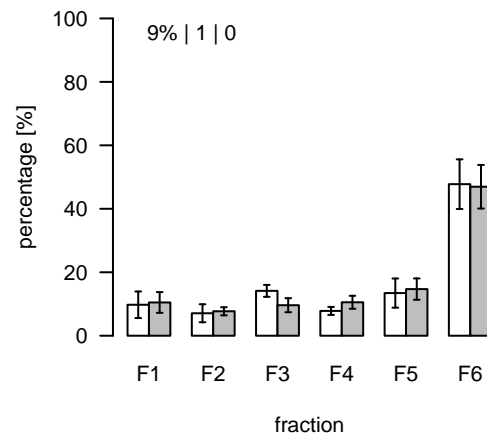

**L1996 (m/z=443.279509; rt=10.08991)**  
T/S Cluster: L-10.1-6

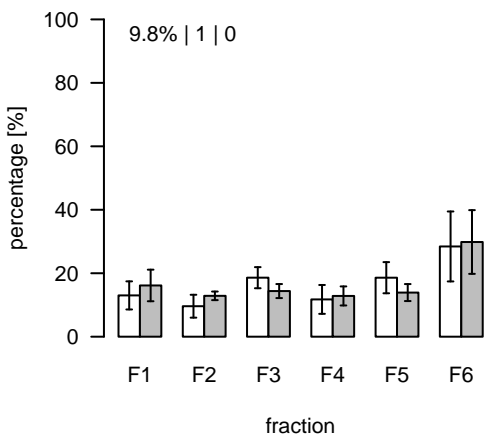

**L2001 (m/z=443.284526; rt=10.09023)**  
T/S Cluster: L-10.1-6

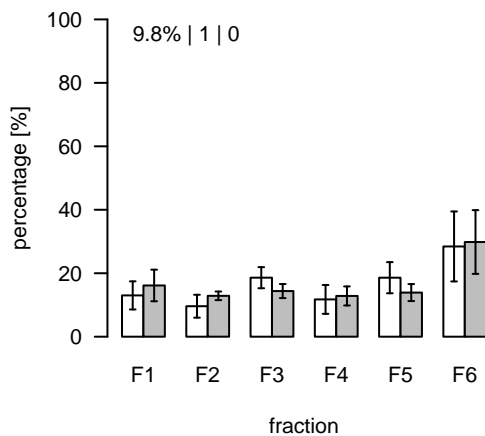

**L2016 (m/z=436.77956; rt=10.11851)**  
T/S Cluster: L-10.1-6

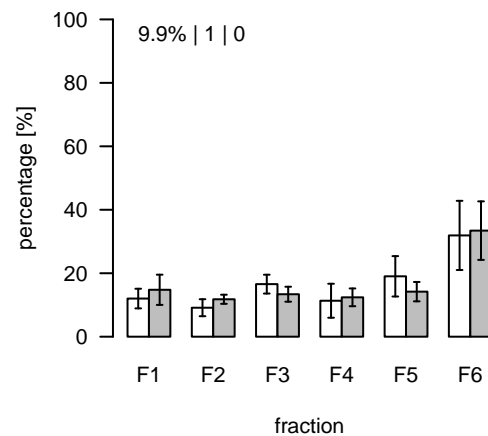

**L2005 (m/z=295.190323; rt=10.09039)**  
T/S Cluster: L-10.1-6

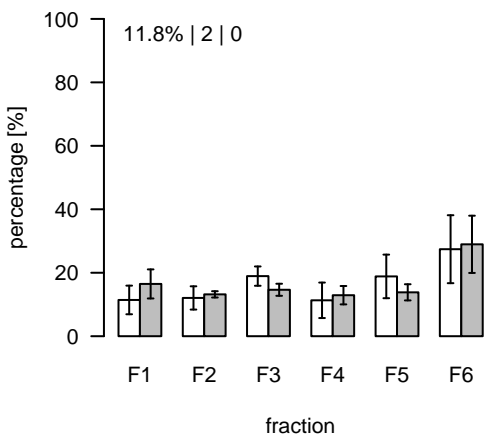

**L1998 (m/z=295.186385; rt=10.08998)**  
T/S Cluster: L-10.1-6

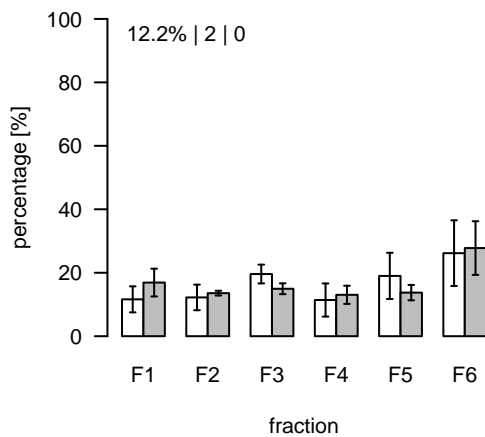

**L2003 (m/z=907.490336; rt=10.09036)**  
T/S Cluster: L-10.1-7

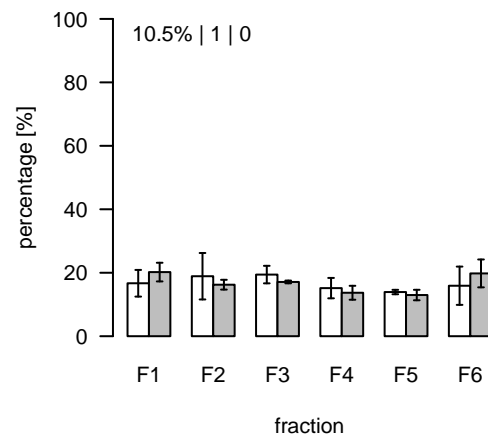

**L2007 (m/z=908.543622; rt=10.09159)**  
T/S Cluster: L-10.1-8

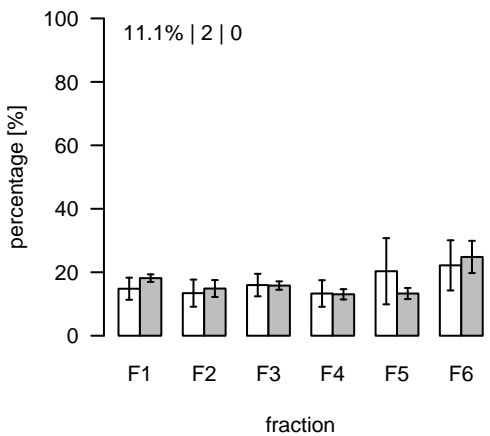

**L2010 (m/z=908.50611; rt=10.0946)**  
T/S Cluster: L-10.1-8

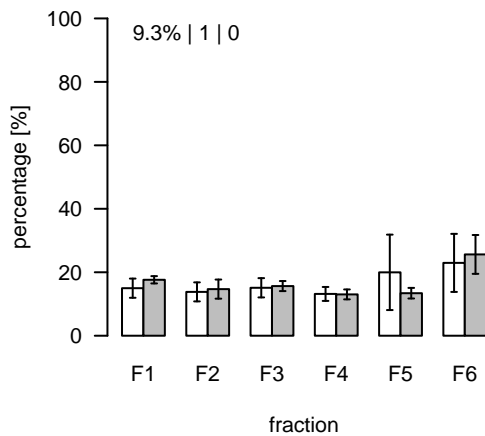

**L2009 (m/z=909.541936; rt=10.09429)**  
T/S Cluster: L-10.1-9

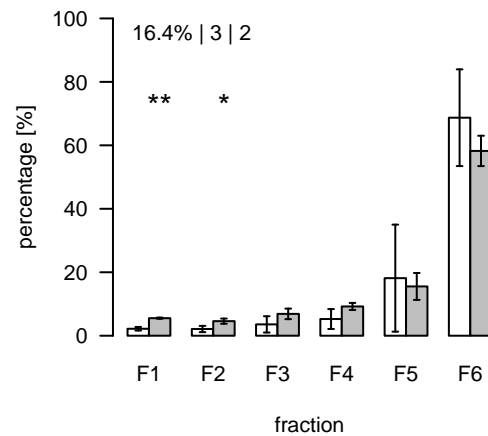

**L2008 (m/z=910.544409; rt=10.09393)**  
T/S Cluster: L-10.1-9

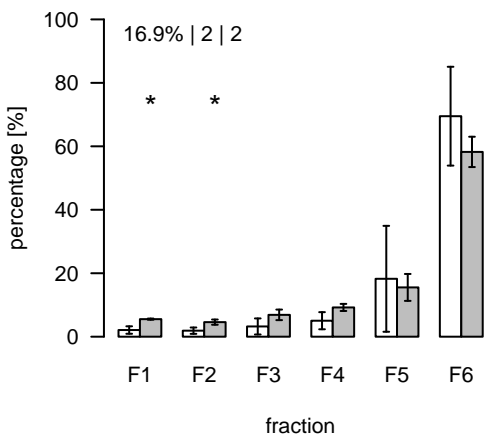

**L2011 (m/z=909.486693; rt=10.09542)**  
T/S Cluster: L-10.1-9

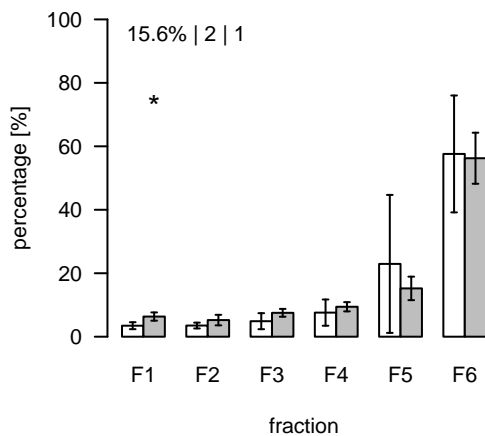

**L2023 (m/z=895.538016; rt=10.12149)**  
T/S Cluster: L-10.1-10

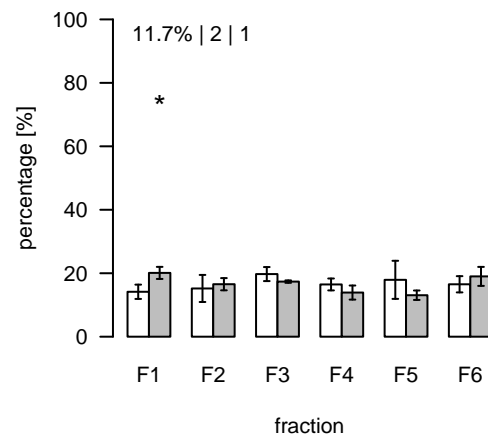

**L2024 (m/z=895.500684; rt=10.1223)**  
T/S Cluster: L-10.1-11

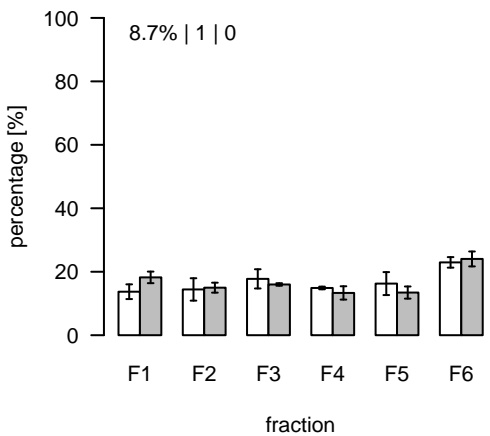

**L2026 (m/z=1194.827037; rt=10.1282)**  
T/S Cluster: L-10.1-12

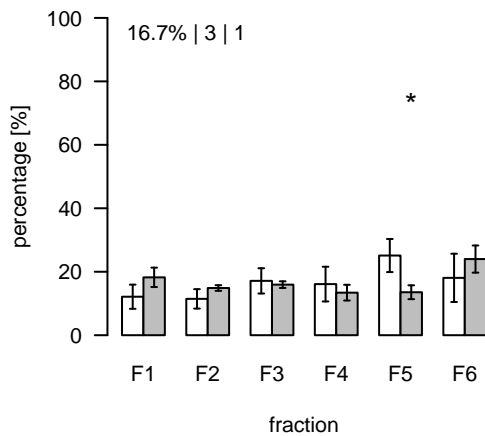

**L2025 (m/z=1195.831125; rt=10.12737)**  
T/S Cluster: L-10.1-12

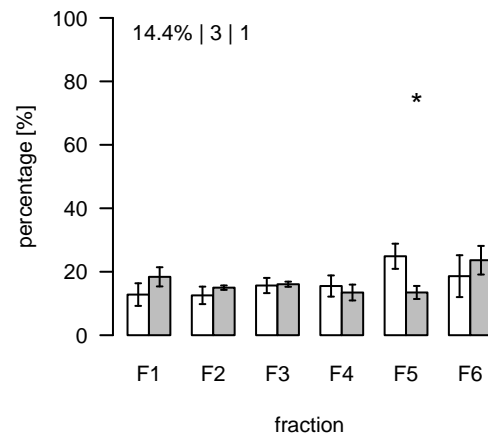

**L2027 (m/z=774.603625; rt=10.1583)**  
T/S Cluster: L-10.2-1

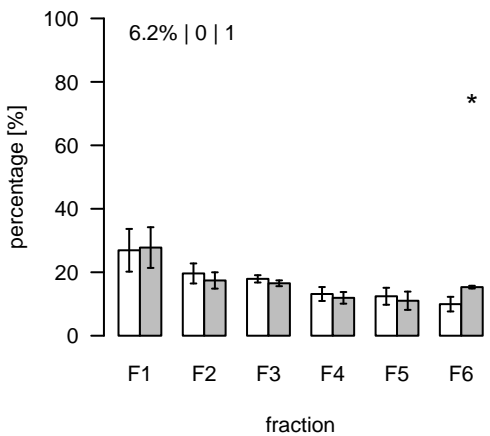

**L2028 (m/z=774.588261; rt=10.15939)**  
T/S Cluster: L-10.2-1

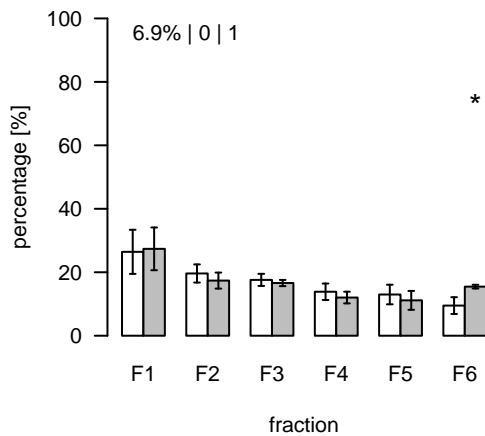

**L2035 (m/z=925.536904; rt=10.21263)**  
T/S Cluster: L-10.2-2

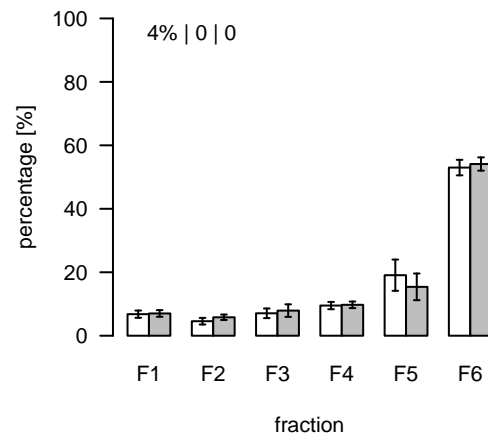



**L2034 (m/z=926.539111; rt=10.21262)**  
T/S Cluster: L-10.2-2

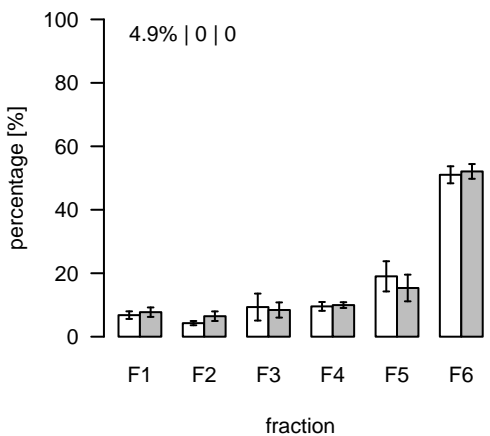

**L2036 (m/z=925.494526; rt=10.21264)**  
T/S Cluster: L-10.2-2

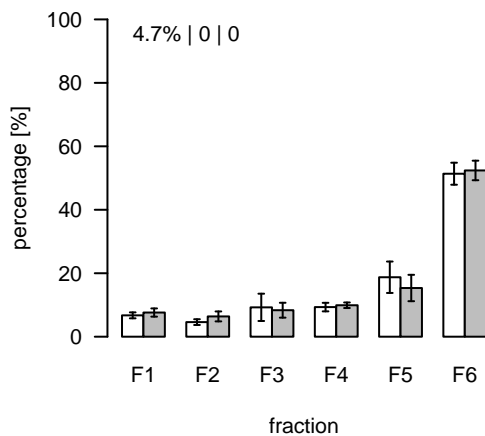

**L2031 (m/z=927.542139; rt=10.21243)**  
T/S Cluster: L-10.2-2

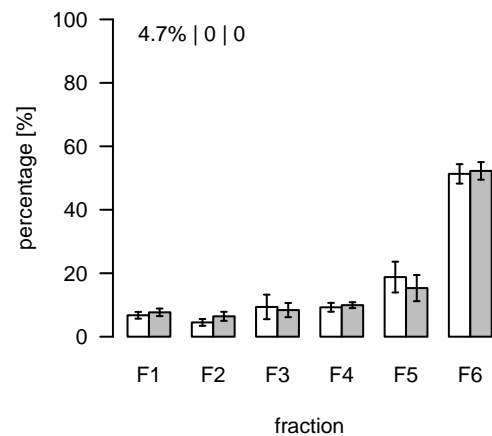

**L2038 (m/z=926.491978; rt=10.21265)**  
T/S Cluster: L-10.2-2

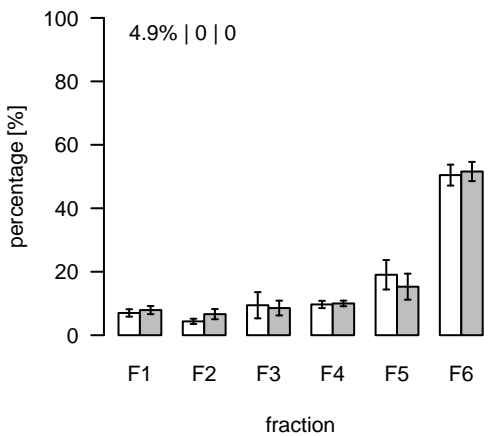

**L2032 (m/z=927.509817; rt=10.21243)**  
T/S Cluster: L-10.2-2

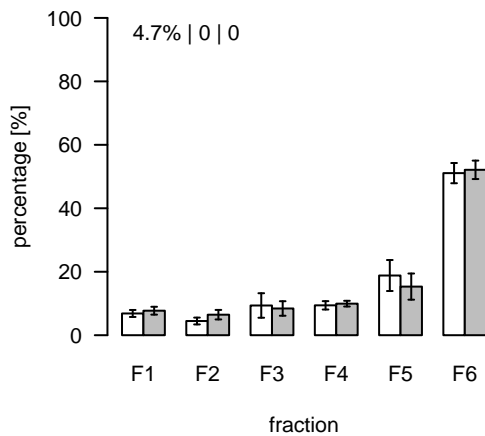

**L2043 (m/z=928.543872; rt=10.21377)**  
T/S Cluster: L-10.2-2

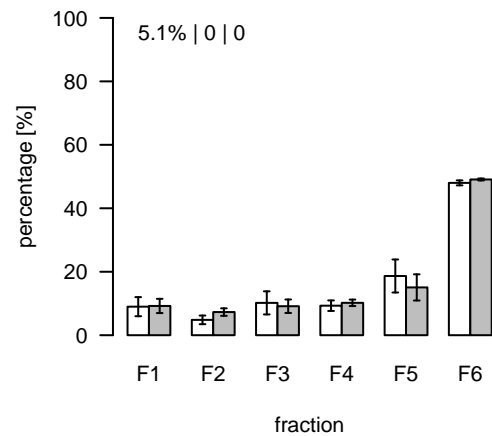

**L2037 (m/z=462.766652; rt=10.21265)**  
T/S Cluster: L-10.2-2

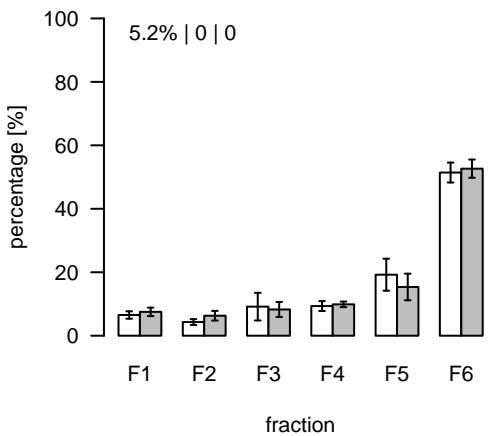

**L2039 (m/z=462.775013; rt=10.21267)**  
T/S Cluster: L-10.2-2

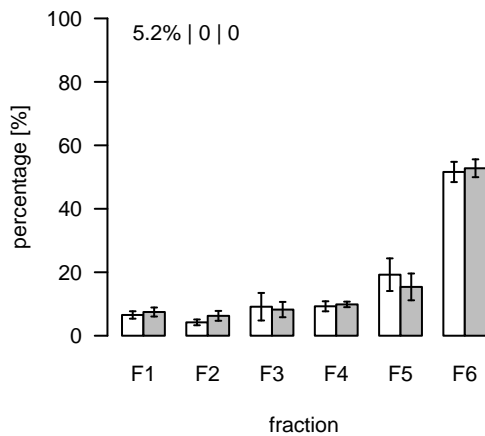

**L2042 (m/z=928.511794; rt=10.21371)**  
T/S Cluster: L-10.2-2

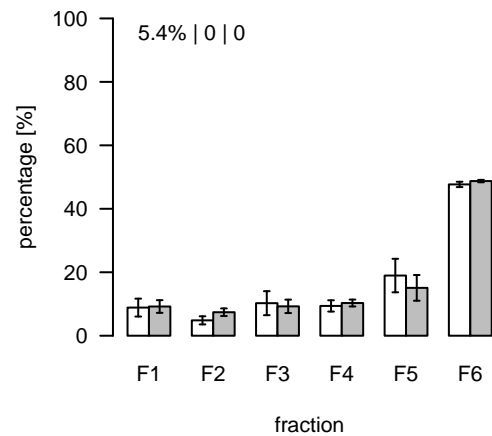

**L2040 (m/z=463.274594; rt=10.21282)**  
T/S Cluster: L-10.2-2

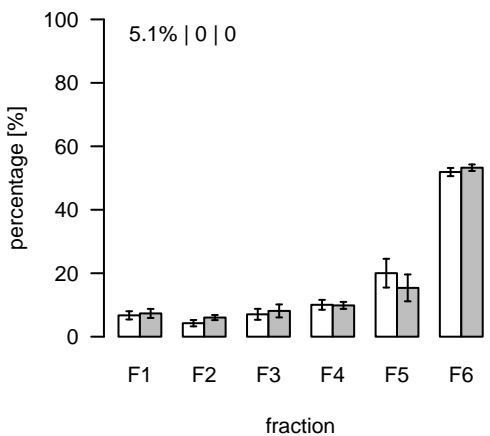

**L2041 (m/z=463.266892; rt=10.21295)**  
T/S Cluster: L-10.2-2

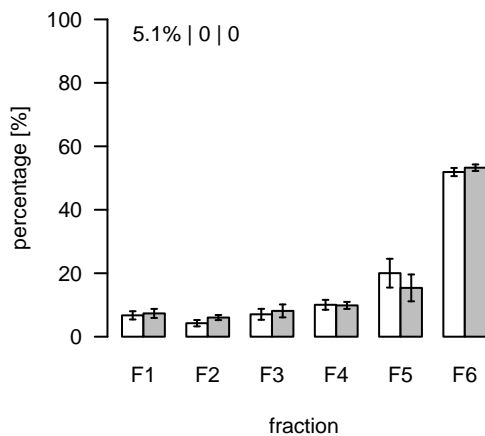

**L2029 (m/z=925.623075; rt=10.21071)**  
T/S Cluster: L-10.2-2

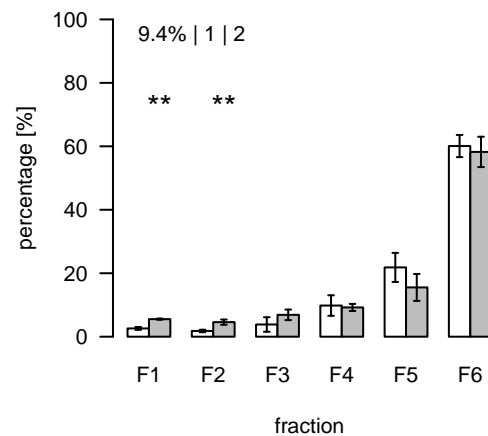

**L2030 (m/z=924.536234; rt=10.21243)**  
T/S Cluster: L-10.2-2

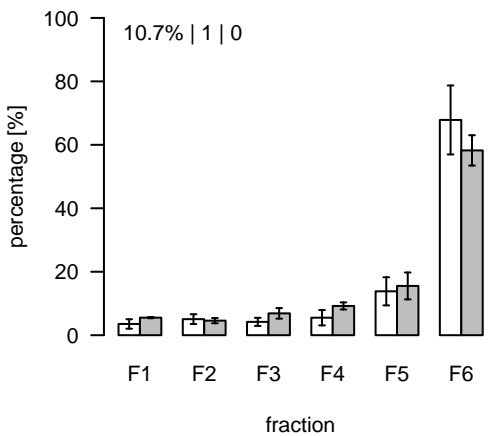

**L2033 (m/z=924.525996; rt=10.21248)**  
T/S Cluster: L-10.2-2

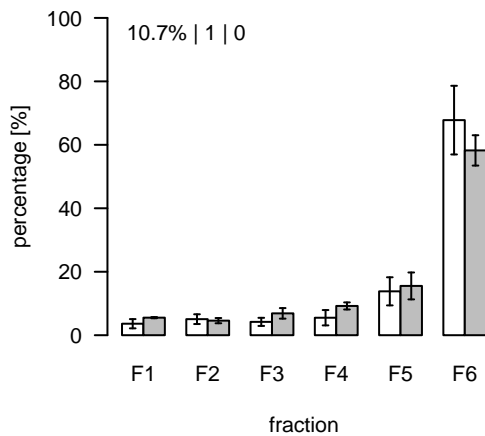

**L2044 (m/z=947.519935; rt=10.21451)**  
T/S Cluster: L-10.2-3

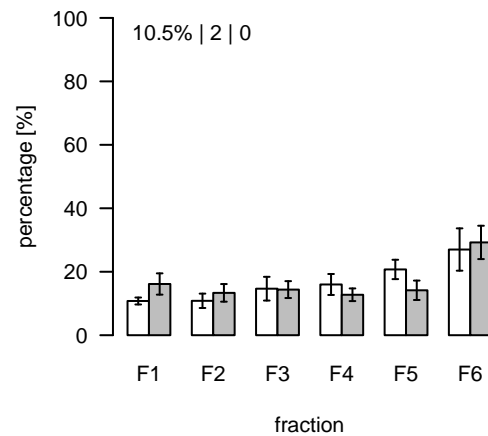

**L2045 (m/z=948.522734; rt=10.21488)**  
T/S Cluster: L-10.2-3

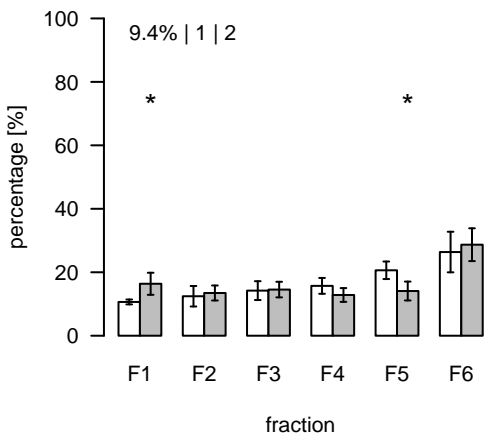

**L2046 (m/z=522.598985; rt=10.24513)**  
T/S Cluster: L-10.2-4

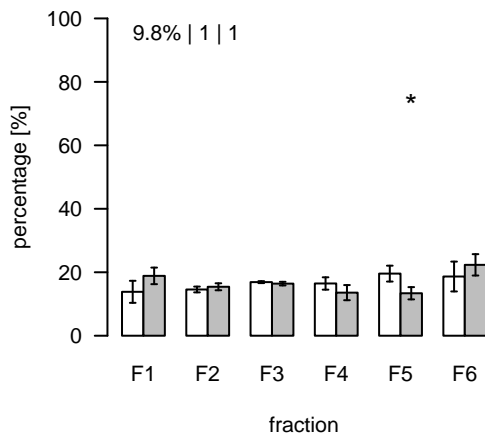

**L2051 (m/z=909.541249; rt=10.29466)**  
T/S Cluster: L-10.3-1

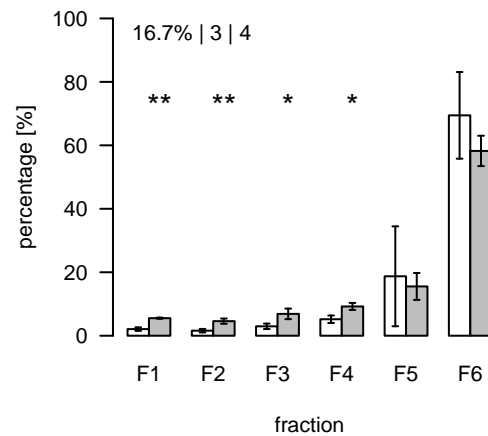

**L2050 (m/z=910.5442; rt=10.29464)**  
T/S Cluster: L-10.3-1

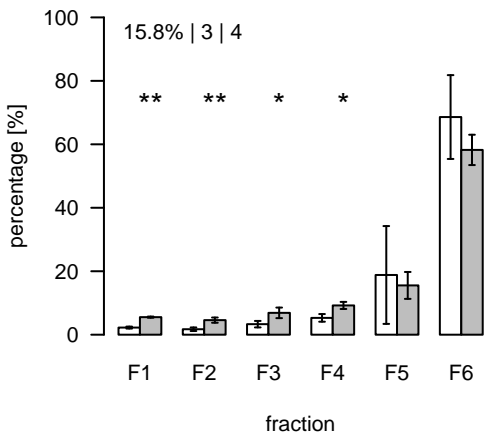

**L2047 (m/z=911.544359; rt=10.29426)**  
T/S Cluster: L-10.3-1

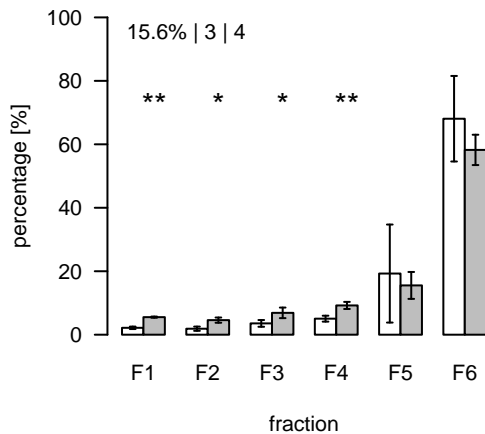

**L2049 (m/z=909.48678; rt=10.29443)**  
T/S Cluster: L-10.3-1

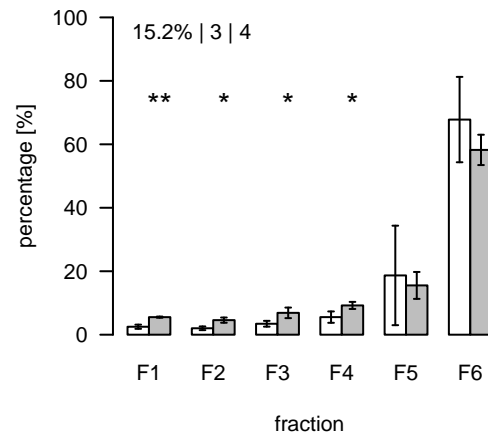

**L2048 (m/z=910.489948; rt=10.29432)**  
T/S Cluster: L-10.3-1

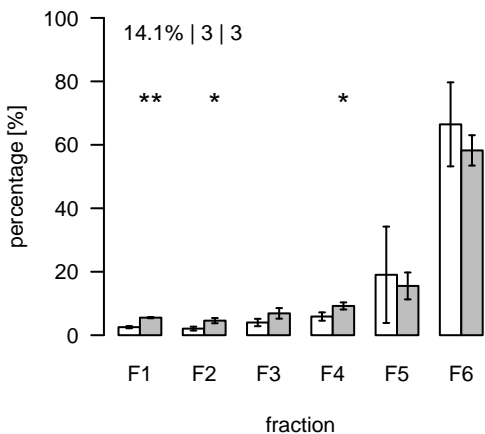

**L2053 (m/z=885.557761; rt=10.33861)**  
T/S Cluster: L-10.3-2

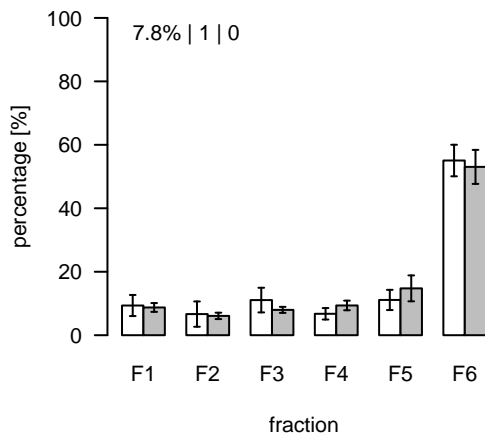

**L2052 (m/z=885.525658; rt=10.33784)**  
T/S Cluster: L-10.3-2

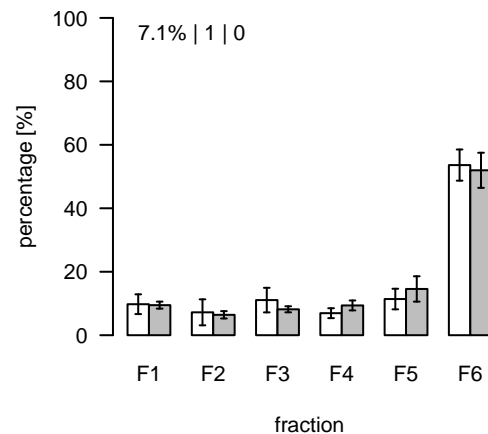

**L2056 (m/z=886.56175; rt=10.34315)**  
T/S Cluster: L-10.3-2

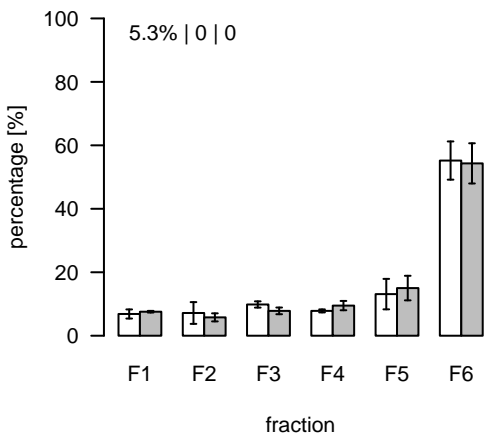

**L2055 (m/z=886.533141; rt=10.34109)**  
T/S Cluster: L-10.3-2

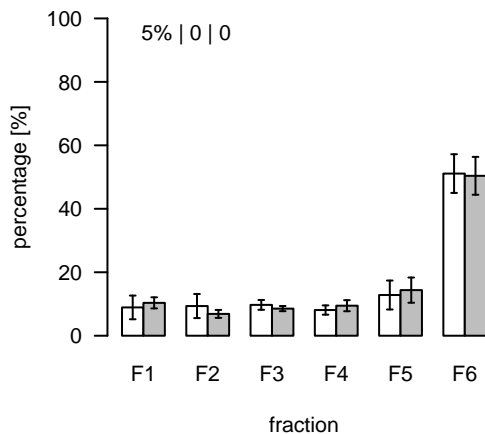

**L2054 (m/z=907.590279; rt=10.33947)**  
T/S Cluster: L-10.3-3

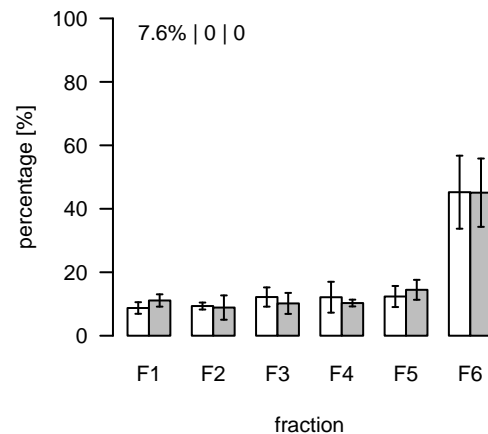

**L2065 (m/z=774.612968; rt=10.38645)**  
T/S Cluster: L-10.4-1

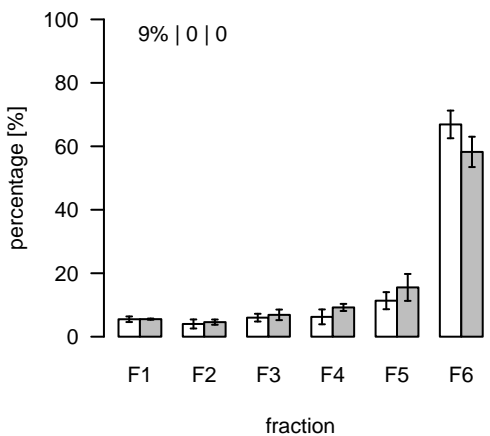

**L2066 (m/z=775.616301; rt=10.38649)**  
T/S Cluster: L-10.4-1

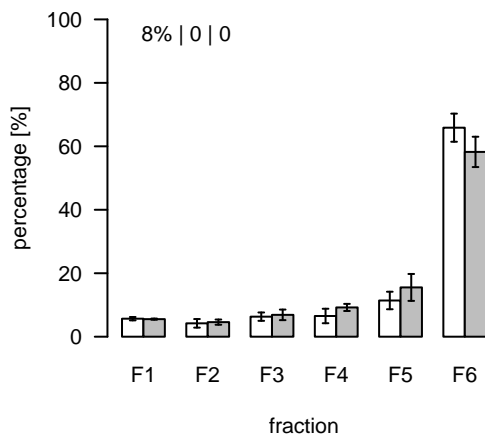

**L2058 (m/z=779.570103; rt=10.38536)**  
T/S Cluster: L-10.4-1

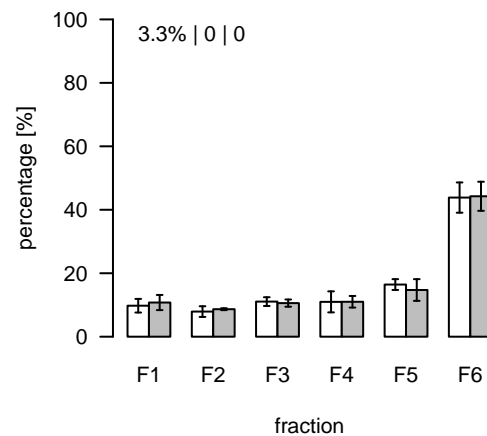

**L2057 (m/z=779.548463; rt=10.38528)**  
T/S Cluster: L-10.4-1

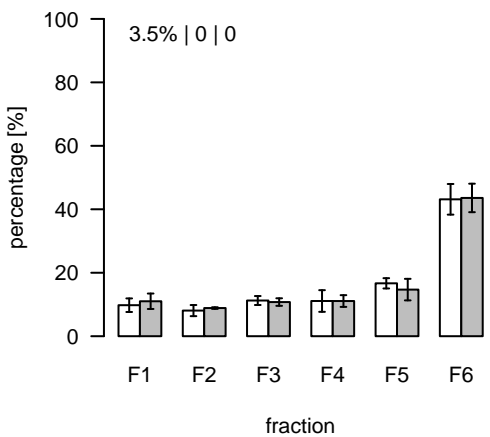

**L2070 (m/z=887.57486; rt=10.4282)**  
T/S Cluster: L-10.4-1

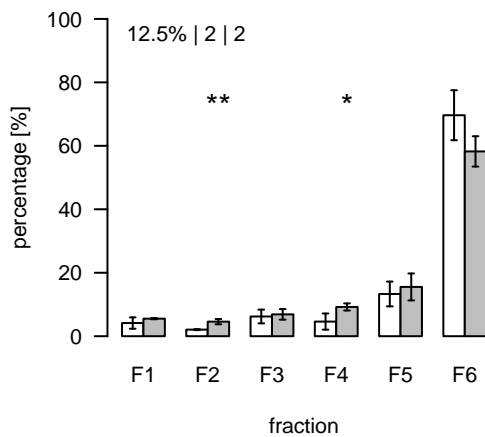

**L2063 (m/z=775.580226; rt=10.38633)**  
T/S Cluster: L-10.4-1

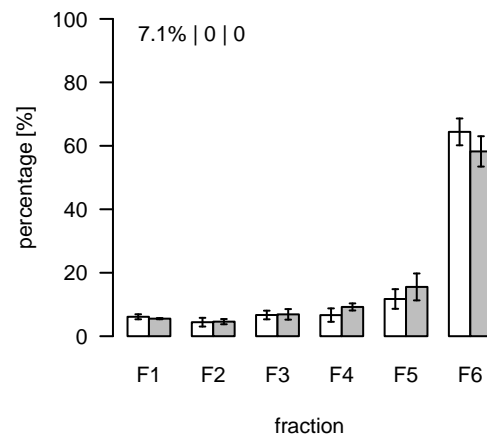

**L2073 (m/z=887.543484; rt=10.43113)**  
T/S Cluster: L-10.4-1

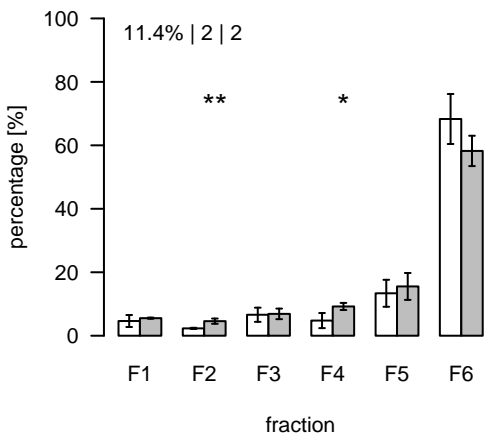

**L2059 (m/z=780.571324; rt=10.38554)**  
T/S Cluster: L-10.4-1

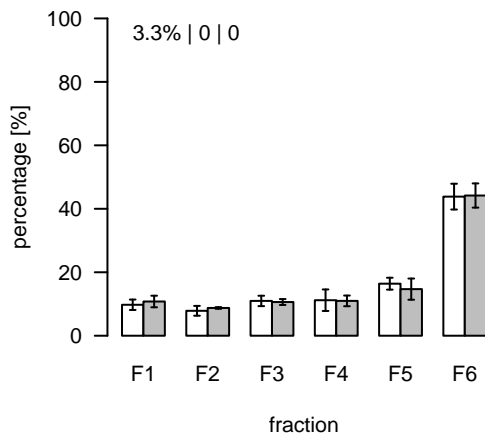

**L2064 (m/z=776.619687; rt=10.38643)**  
T/S Cluster: L-10.4-1

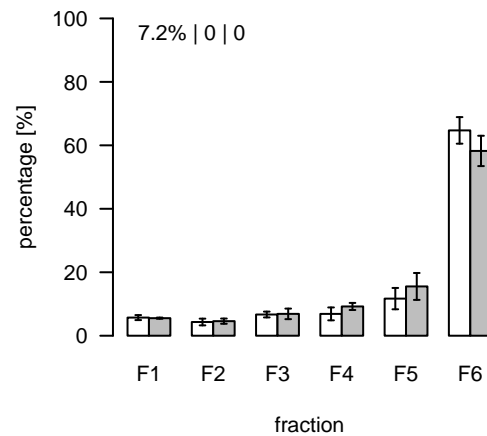

**L2062 (m/z=387.307343; rt=10.38628)**  
T/S Cluster: L-10.4-1

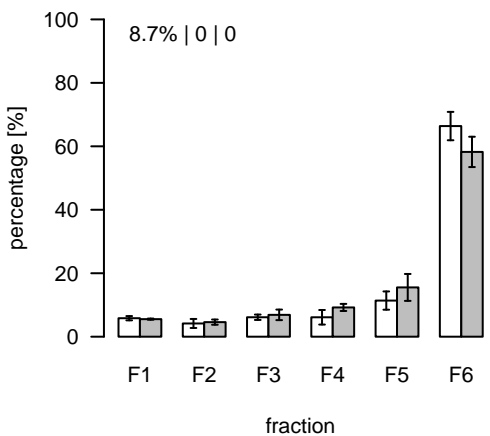

**L2069 (m/z=888.576589; rt=10.42726)**  
T/S Cluster: L-10.4-1

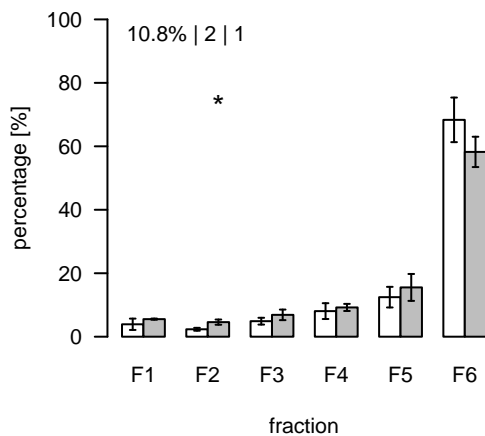

**L2071 (m/z=888.553802; rt=10.4285)**  
T/S Cluster: L-10.4-1

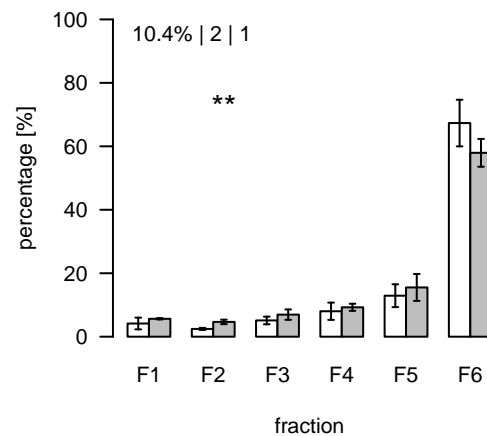

**L2060 (m/z=774.555909; rt=10.38586)**  
T/S Cluster: L-10.4-1

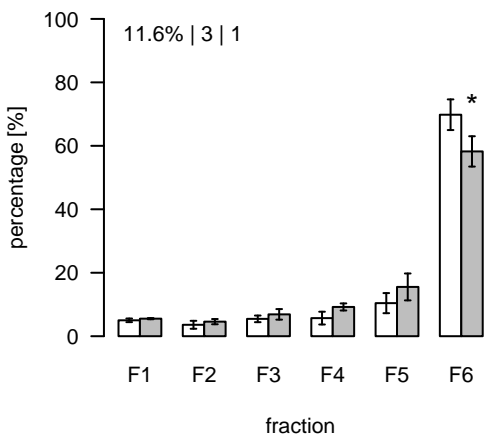

**L2067 (m/z=889.565099; rt=10.39685)**  
T/S Cluster: L-10.4-1

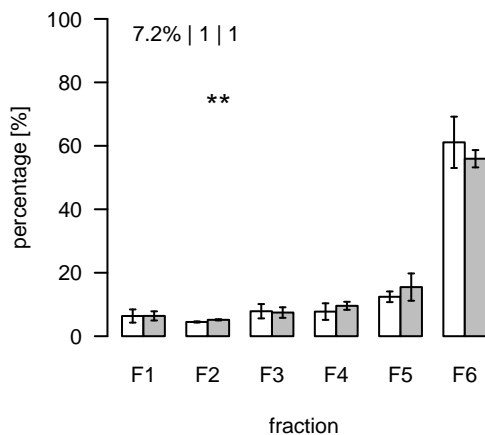

**L2068 (m/z=889.589677; rt=10.39718)**  
T/S Cluster: L-10.4-1

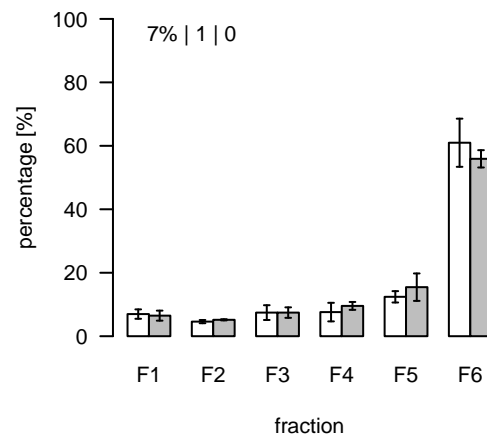

**L2061 (m/z=776.587669; rt=10.38603)**  
T/S Cluster: L-10.4-1

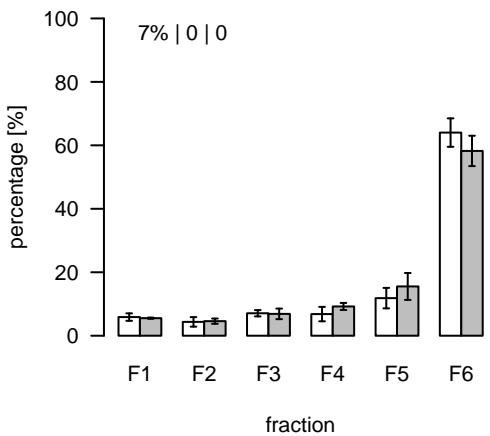

**L2072 (m/z=907.527807; rt=10.4285)**  
T/S Cluster: L-10.4-2

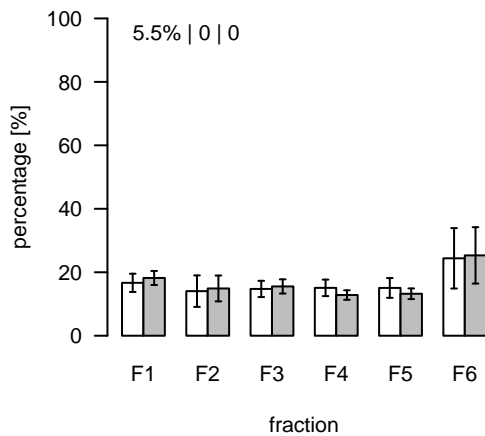

**L2074 (m/z=917.587465; rt=10.47163)**  
T/S Cluster: L-10.5-1

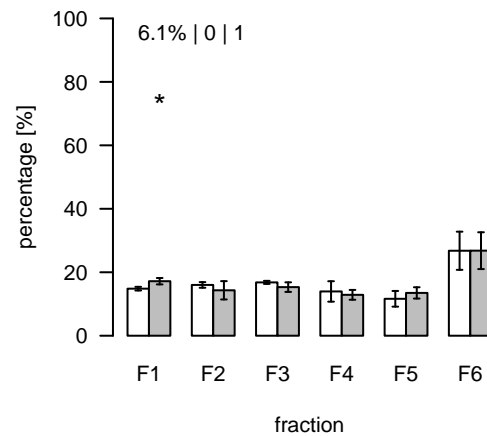

**L2076 (m/z=938.67907; rt=10.48399)**  
T/S Cluster: L-10.5-2

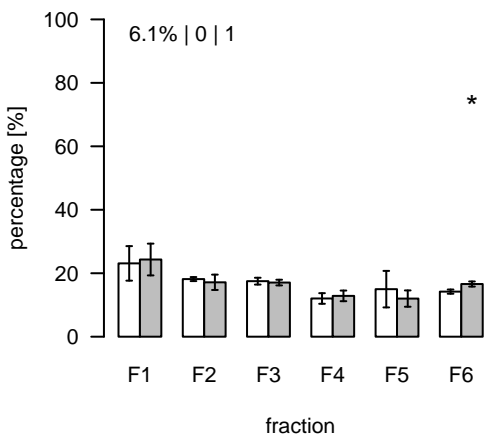

**L2075 (m/z=939.681812; rt=10.483)**  
T/S Cluster: L-10.5-2

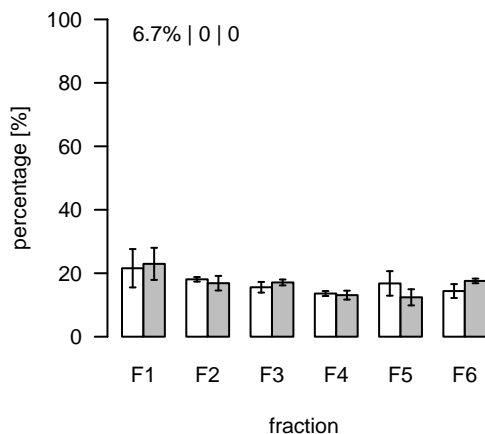

**L2077 (m/z=865.517332; rt=10.48891)**  
T/S Cluster: L-10.5-3

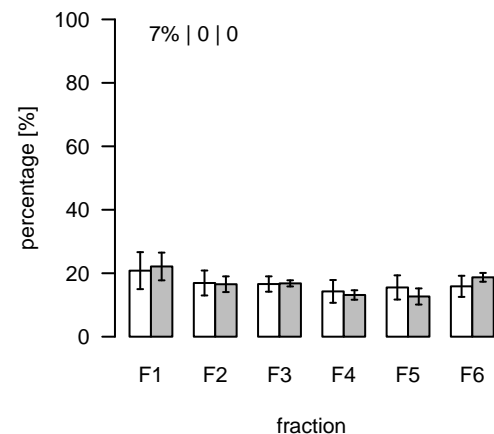

**L2092 (m/z=897.55662; rt=10.50423)**  
T/S Cluster: L-10.5-4

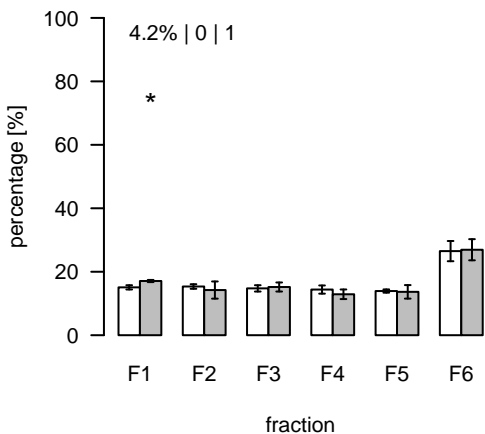

**L2097 (m/z=897.521981; rt=10.50437)**  
T/S Cluster: L-10.5-4

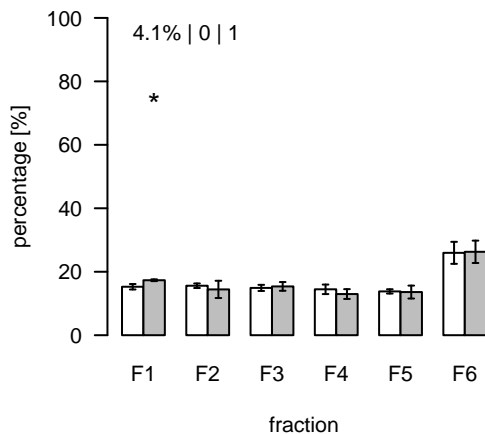

**L2079 (m/z=953.612228; rt=10.49444)**  
T/S Cluster: L-10.5-4

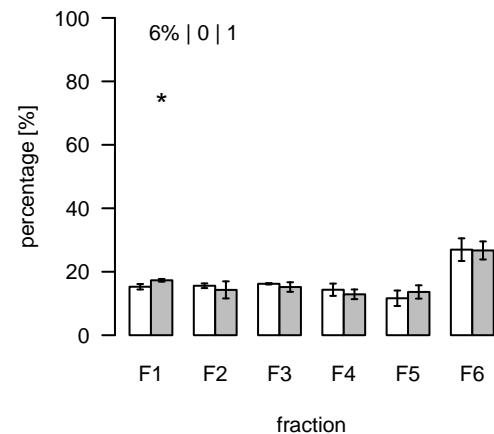

**L2078 (m/z=953.569522; rt=10.48921)**  
T/S Cluster: L-10.5-4

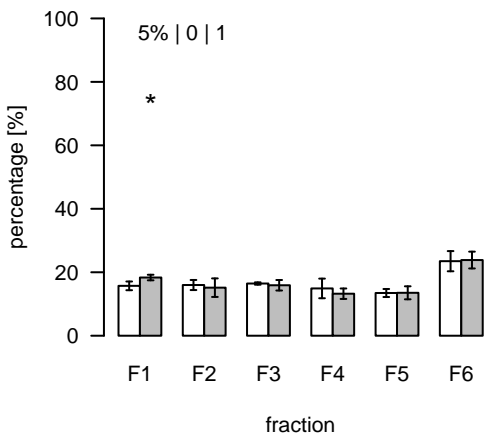

**L2080 (m/z=918.535582; rt=10.49587)**  
T/S Cluster: L-10.5-5

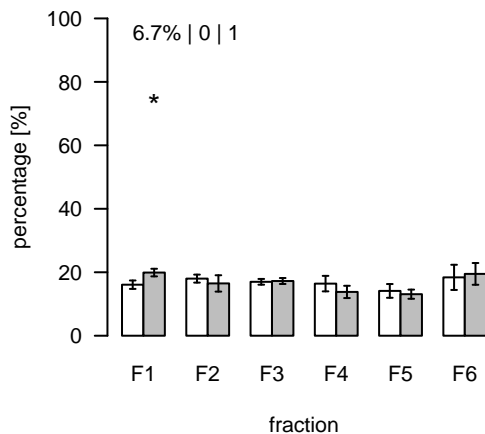

**L2081 (m/z=917.534669; rt=10.49756)**  
T/S Cluster: L-10.5-6

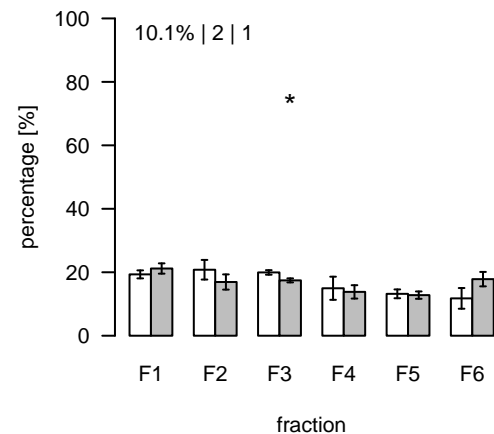

**L2082 (m/z=938.604633; rt=10.49881)**  
T/S Cluster: L-10.5-7

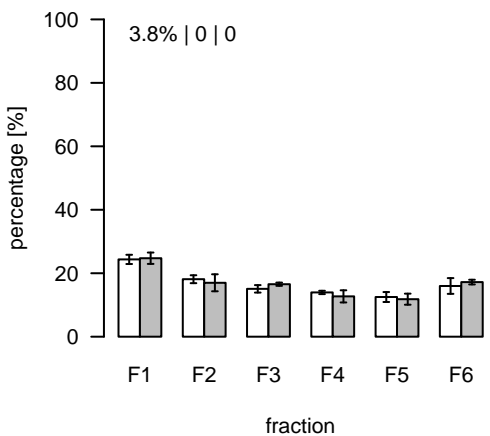

**L2087 (m/z=915.538751; rt=10.49972)**  
T/S Cluster: L-10.5-8

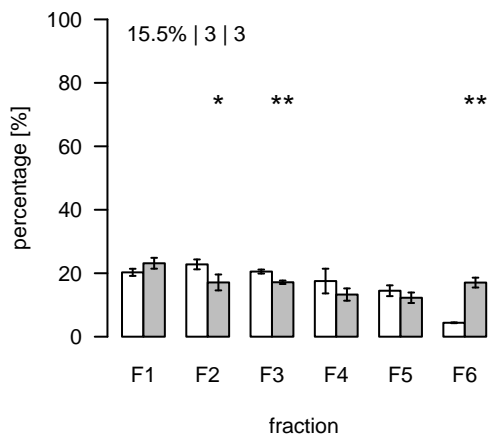

**L2084 (m/z=915.512351; rt=10.49928)**  
T/S Cluster: L-10.5-8

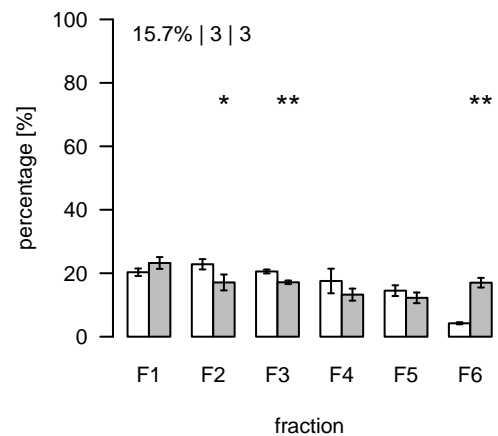

**L2083 (m/z=916.523061; rt=10.49901)**  
T/S Cluster: L-10.5-8

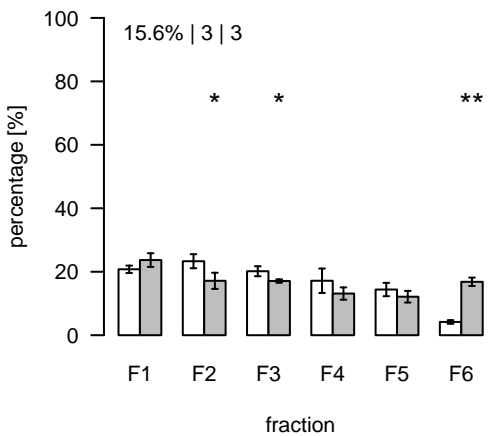

**L2085 (m/z=916.549127; rt=10.49953)**  
T/S Cluster: L-10.5-8

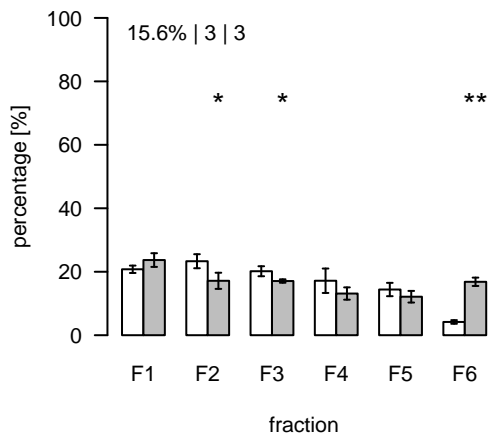

**L2126 (m/z=1092.732376; rt=10.5091)**  
T/S Cluster: L-10.5-8

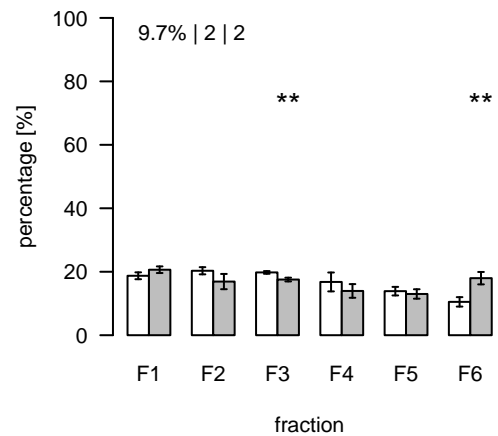

**L2127 (m/z=1091.731047; rt=10.5106)**  
T/S Cluster: L-10.5-8

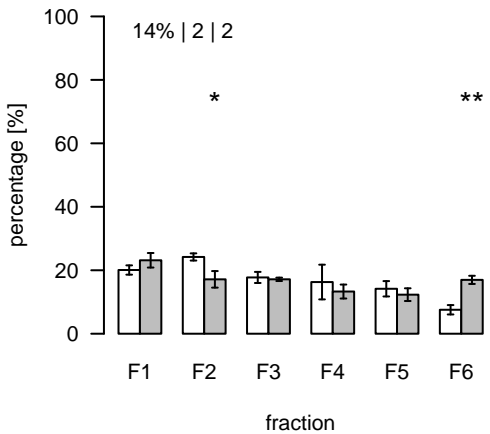

**L2128 (m/z=931.50367; rt=10.51219)**  
T/S Cluster: L-10.5-8

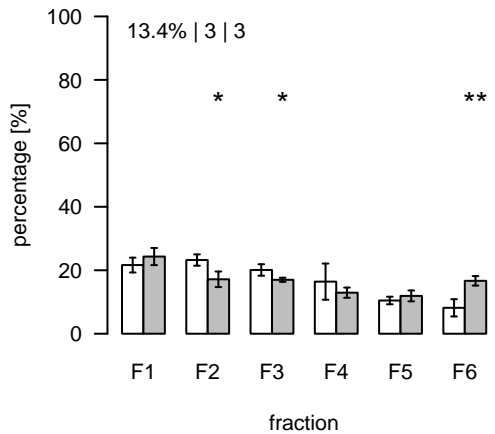

**L2130 (m/z=1090.728949; rt=10.51338)**  
T/S Cluster: L-10.5-8

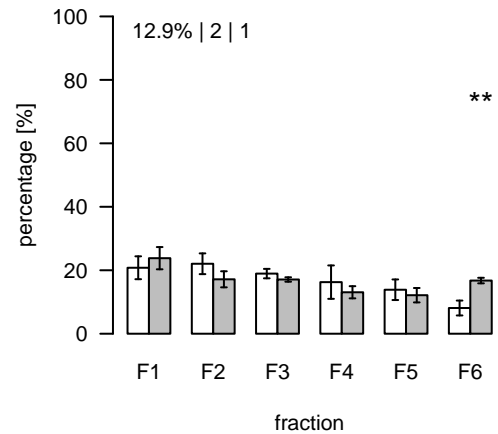

**L2086 (m/z=954.611767; rt=10.49968)**  
T/S Cluster: L-10.5-9

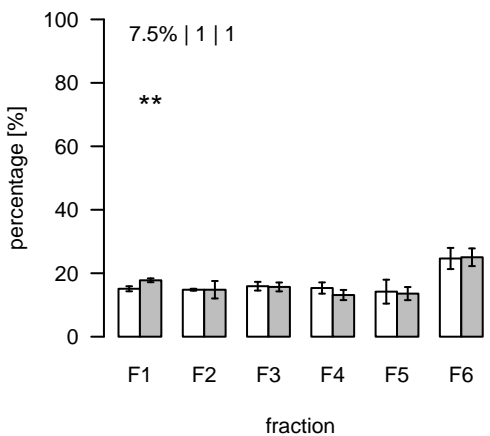

**L2088 (m/z=457.766456; rt=10.49974)**  
T/S Cluster: L-10.5-10

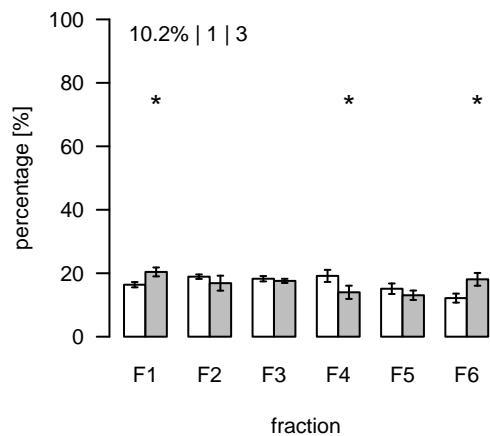

**L2124 (m/z=892.542061; rt=10.50782)**  
T/S Cluster: L-10.5-11

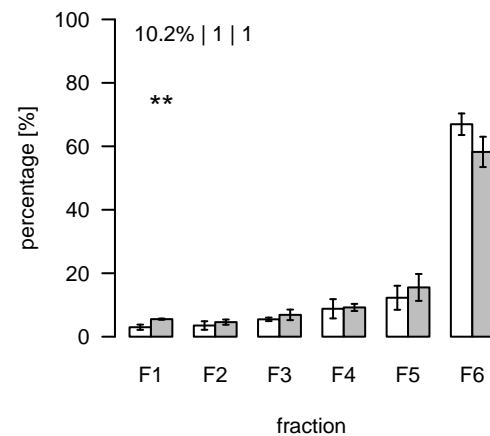

**L2116 (m/z=223.387113; rt=10.5052)**  
T/S Cluster: L-10.5-11

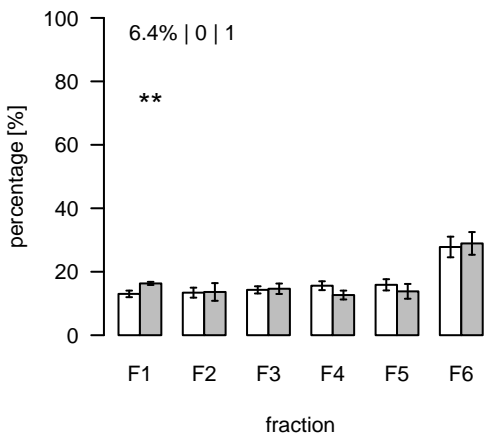

**L2118 (m/z=223.391281; rt=10.50523)**  
T/S Cluster: L-10.5-11

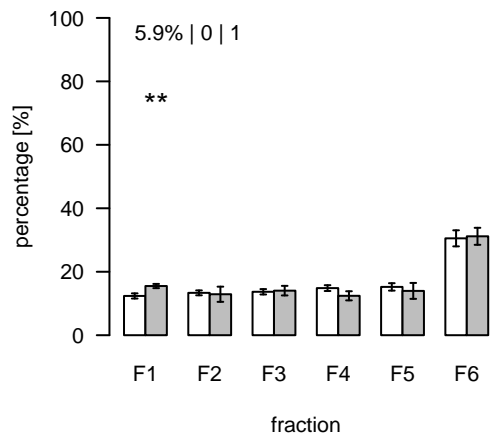

**L2089 (m/z=298.855194; rt=10.50392)**  
T/S Cluster: L-10.5-11

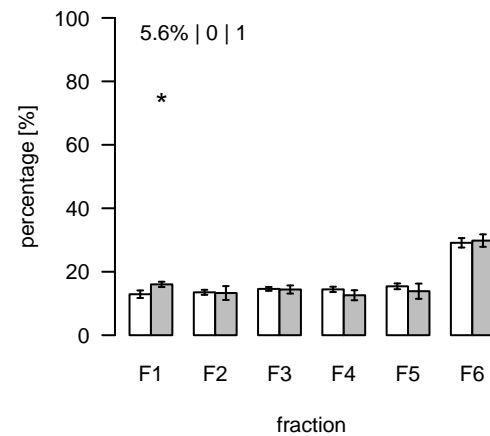

**L2095 (m/z=448.778494; rt=10.50426)**  
T/S Cluster: L-10.5-11

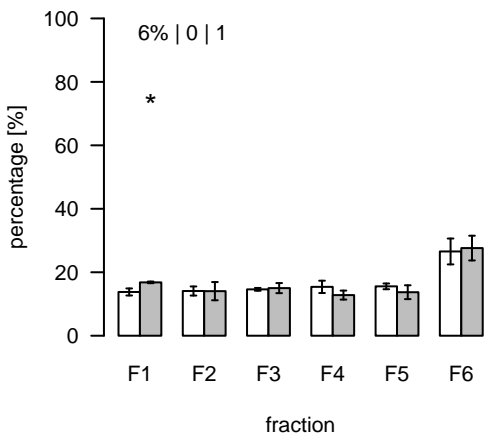

**L2093 (m/z=223.637987; rt=10.50425)**  
T/S Cluster: L-10.5-11

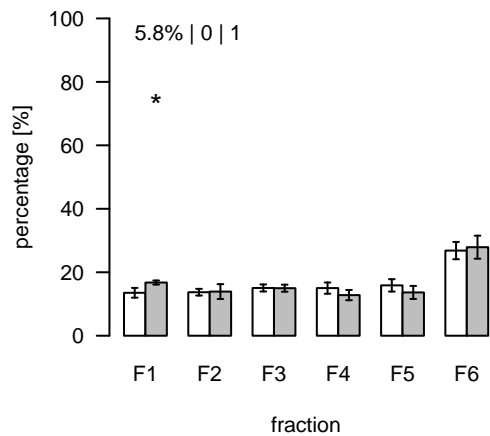

**L2120 (m/z=178.711611; rt=10.50535)**  
T/S Cluster: L-10.5-11

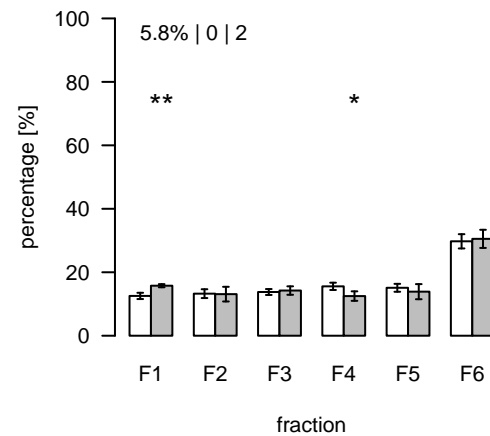



**L2091 (m/z=223.64201; rt=10.50419)**  
T/S Cluster: L-10.5-11

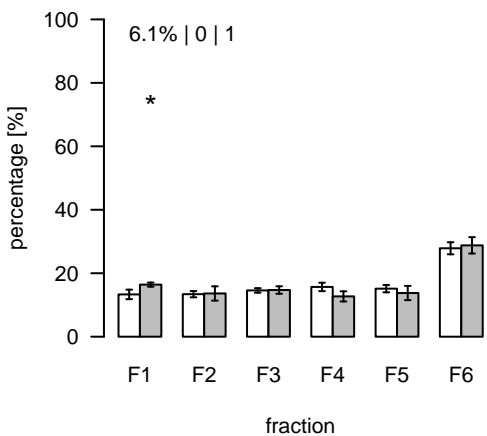

**L2122 (m/z=446.746174; rt=10.50593)**  
T/S Cluster: L-10.5-11

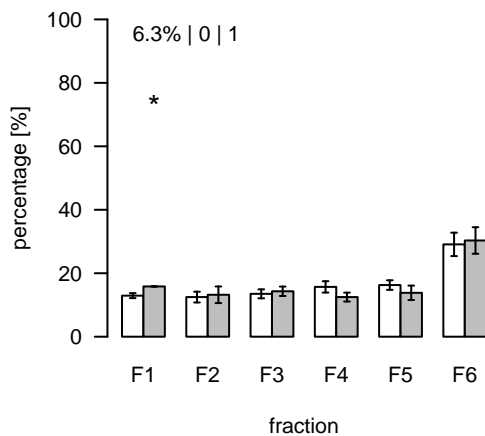

**L2123 (m/z=892.470607; rt=10.50758)**  
T/S Cluster: L-10.5-11

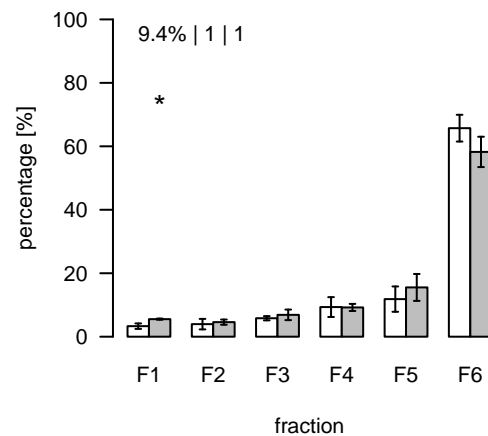

**L2125 (m/z=446.272203; rt=10.50817)**  
T/S Cluster: L-10.5-11

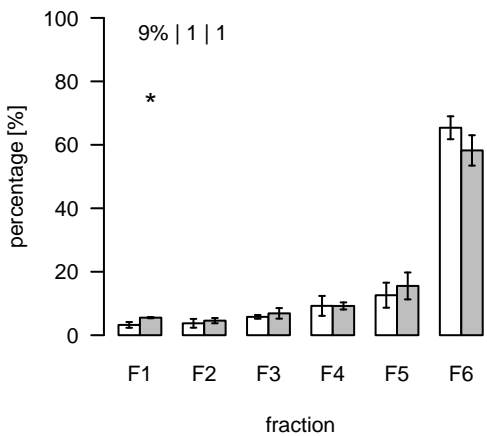

**L2090 (m/z=955.610966; rt=10.5041)**  
T/S Cluster: L-10.5-12

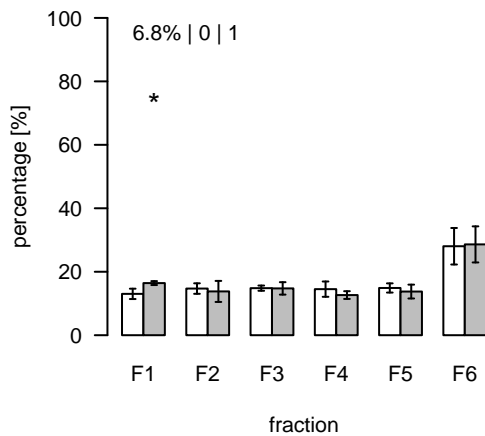

**L2114 (m/z=893.546107; rt=10.50511)**  
T/S Cluster: L-10.5-13

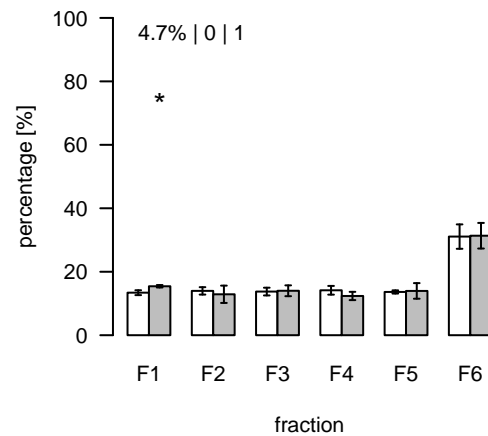

**L2110 (m/z=894.549312; rt=10.50491)**  
T/S Cluster: L-10.5-13

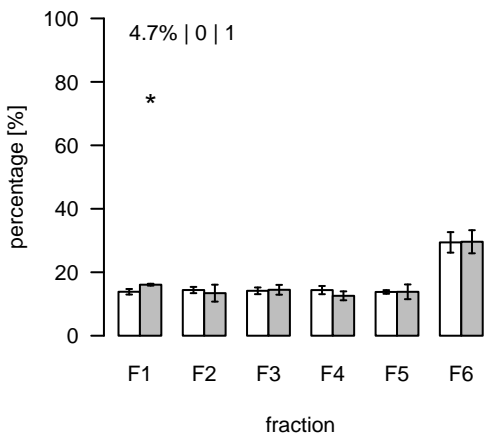

**L2105 (m/z=895.550026; rt=10.50472)**  
T/S Cluster: L-10.5-13

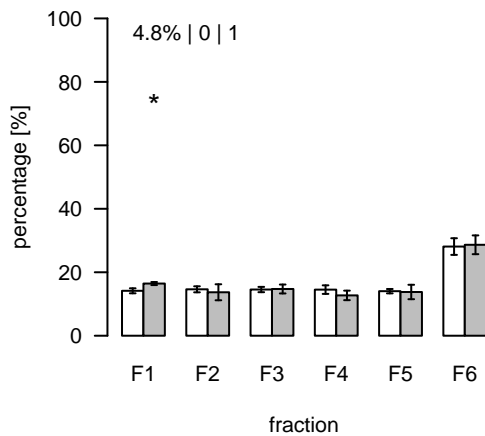

**L2115 (m/z=446.774522; rt=10.50511)**  
T/S Cluster: L-10.5-13

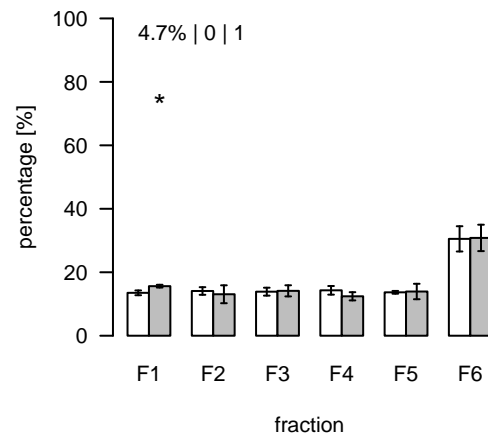

**L2098 (m/z=896.552351; rt=10.50448)**  
T/S Cluster: L-10.5-13

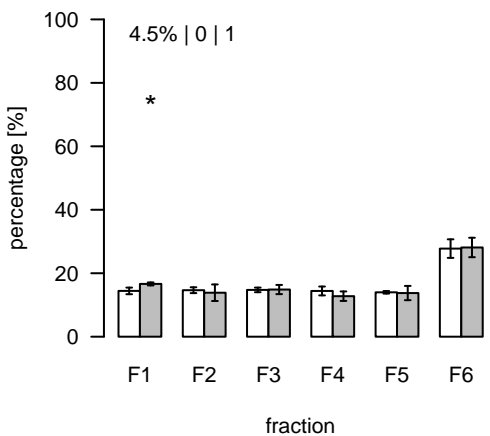

**L2112 (m/z=894.484266; rt=10.50504)**  
T/S Cluster: L-10.5-13

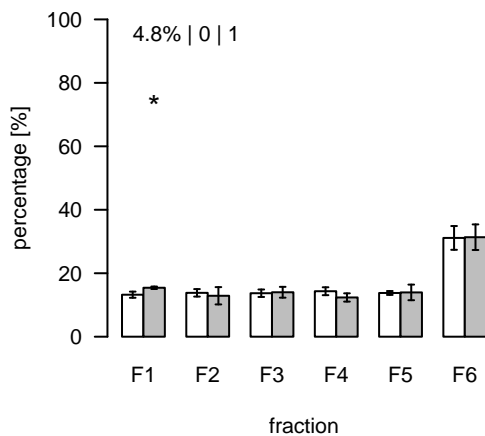

**L2111 (m/z=895.496217; rt=10.50494)**  
T/S Cluster: L-10.5-13

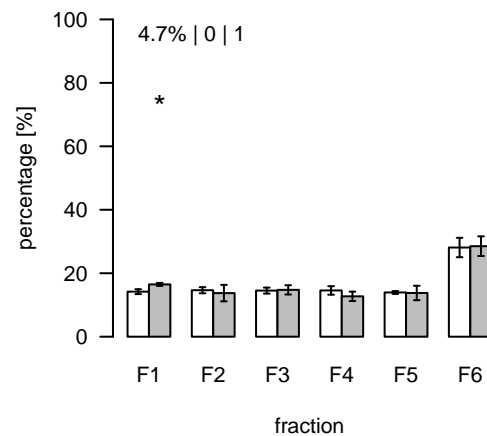

**L2108 (m/z=447.276261; rt=10.50486)**  
T/S Cluster: L-10.5-13

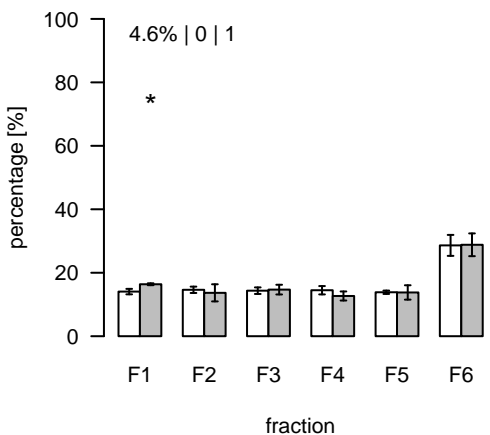

**L2103 (m/z=896.508779; rt=10.50464)**  
T/S Cluster: L-10.5-13

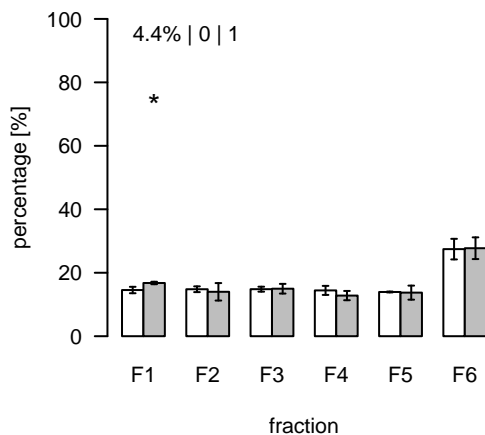

**L2113 (m/z=297.853952; rt=10.5051)**  
T/S Cluster: L-10.5-13

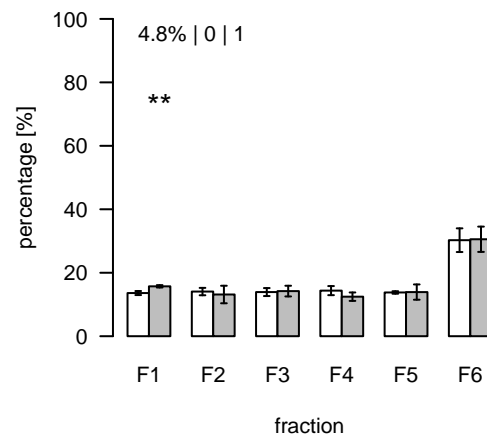

**L2102 (m/z=447.780464; rt=10.50462)**  
T/S Cluster: L-10.5-13

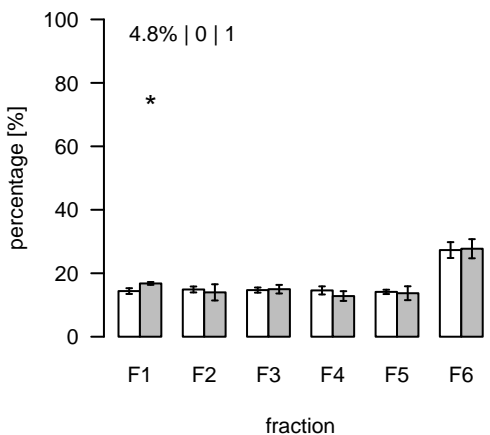

**L2107 (m/z=447.77271; rt=10.50484)**  
T/S Cluster: L-10.5-13

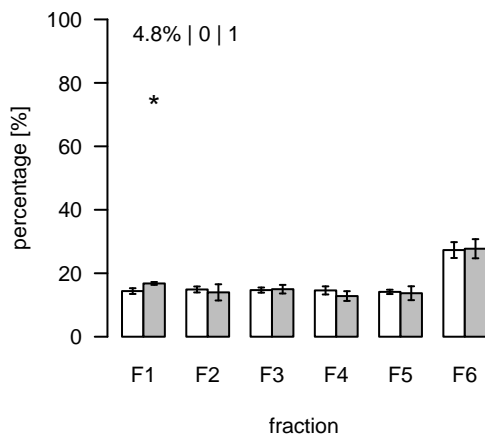

**L2106 (m/z=298.188105; rt=10.50476)**  
T/S Cluster: L-10.5-13

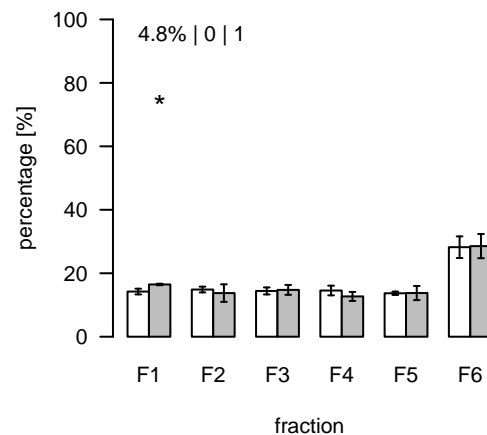

**L2096 (m/z=895.617787; rt=10.50434)**  
T/S Cluster: L-10.5-13

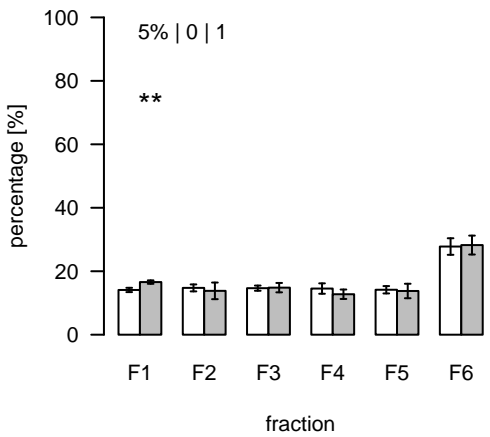

**L2104 (m/z=298.52156; rt=10.50465)**  
T/S Cluster: L-10.5-13

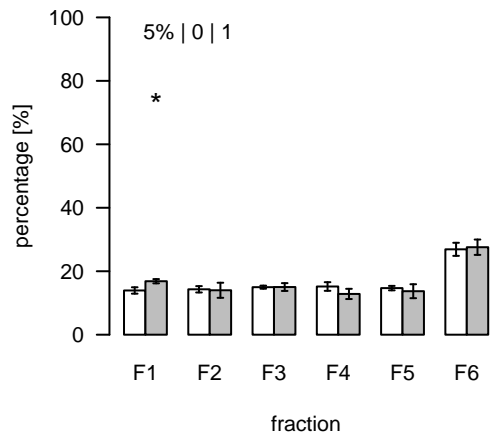

**L2109 (m/z=298.182171; rt=10.50491)**  
T/S Cluster: L-10.5-13

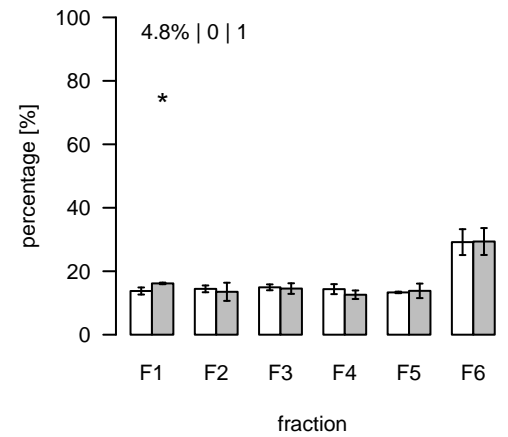

**L2121 (m/z=297.845926; rt=10.50542)**  
T/S Cluster: L-10.5-13

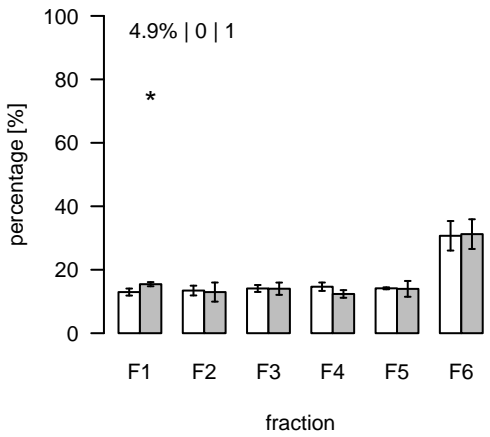

**L2094 (m/z=448.281258; rt=10.50425)**  
T/S Cluster: L-10.5-13

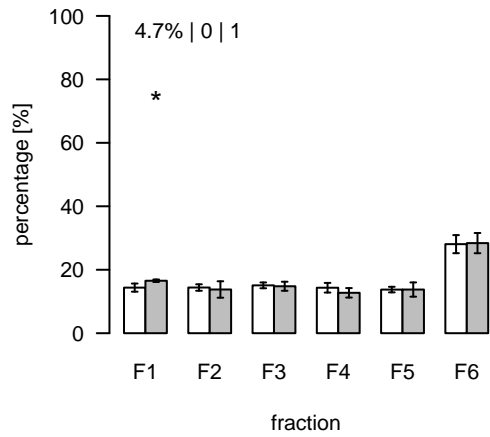

**L2100 (m/z=448.273661; rt=10.50451)**  
T/S Cluster: L-10.5-13

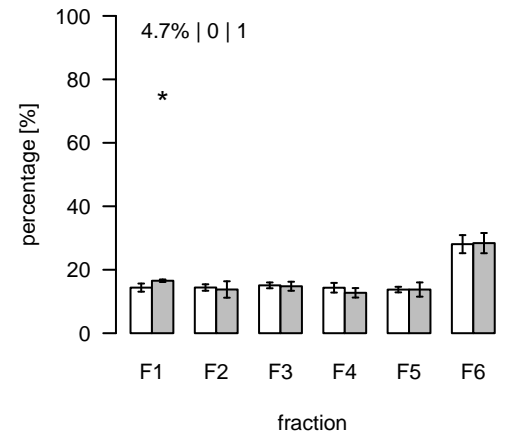

**L2117 (m/z=447.257197; rt=10.50521)**  
T/S Cluster: L-10.5-13

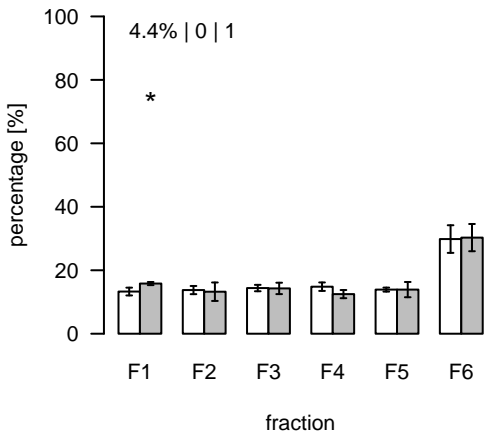

**L2099 (m/z=898.557654; rt=10.5045)**  
T/S Cluster: L-10.5-14

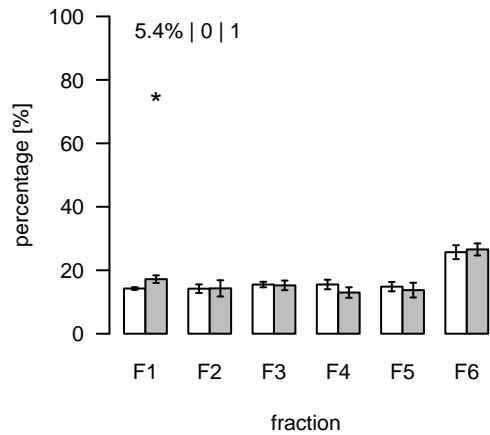

**L2119 (m/z=298.514964; rt=10.50528)**  
T/S Cluster: L-10.5-15

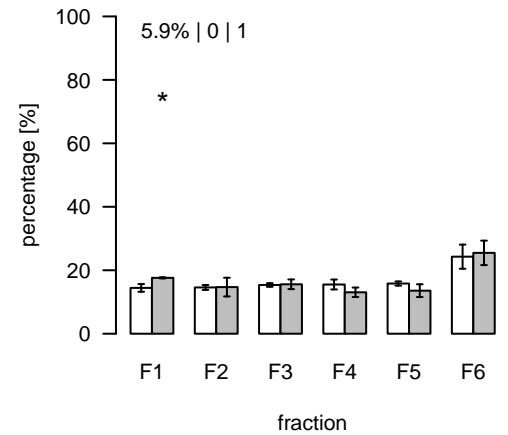

**L2101 (m/z=615.248141; rt=10.50455)**  
T/S Cluster: L-10.5-15

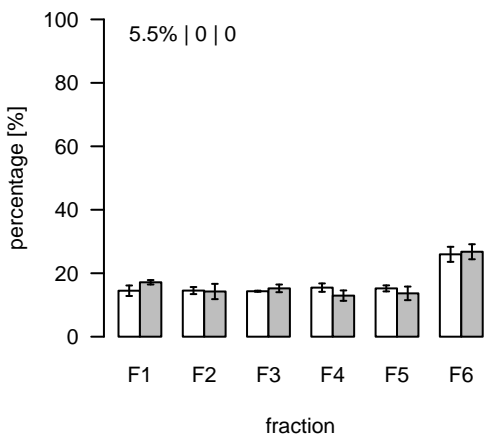

**L2129 (m/z=391.28623; rt=10.51221)**  
T/S Cluster: L-10.5-16

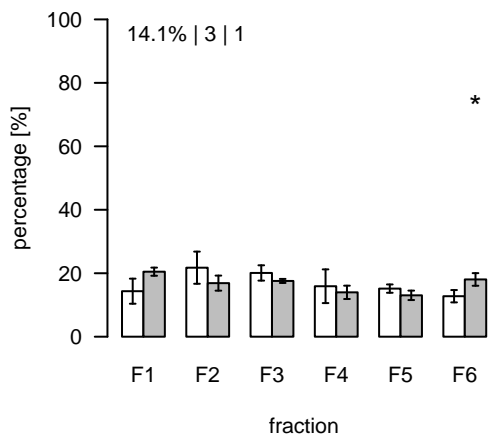

**L2131 (m/z=1089.722261; rt=10.52438)**  
T/S Cluster: L-10.5-17

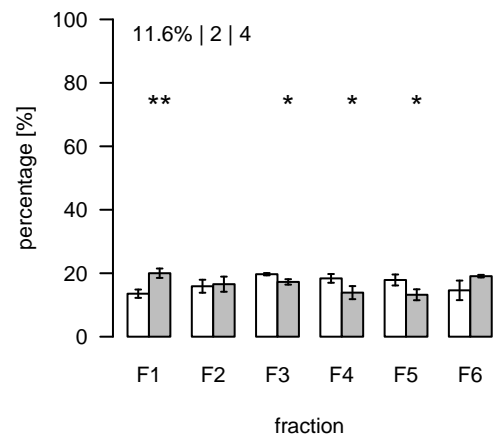

**L2132 (m/z=388.343887; rt=10.5259)**  
T/S Cluster: L-10.5-18

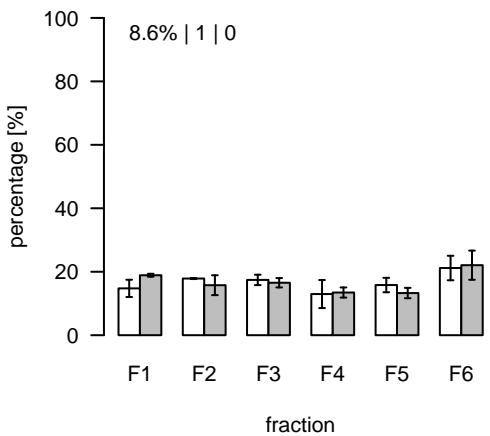

**L2133 (m/z=638.611689; rt=10.55631)**  
T/S Cluster: L-10.6-1

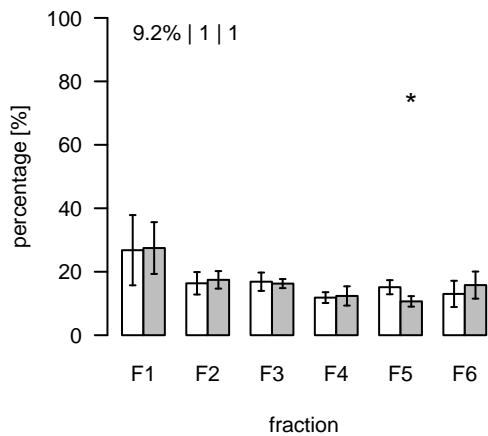

**L2136 (m/z=816.662962; rt=10.58508)**  
T/S Cluster: L-10.6-2

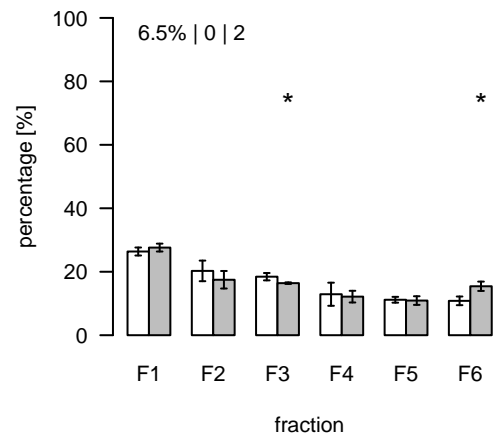

**L2139 (m/z=816.638622; rt=10.58577)**  
T/S Cluster: L-10.6-2

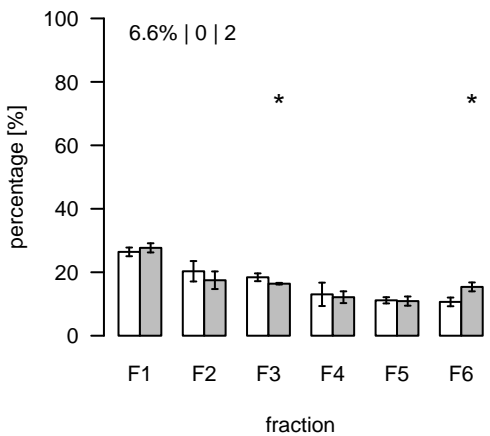

**L2135 (m/z=817.666837; rt=10.58493)**  
T/S Cluster: L-10.6-2

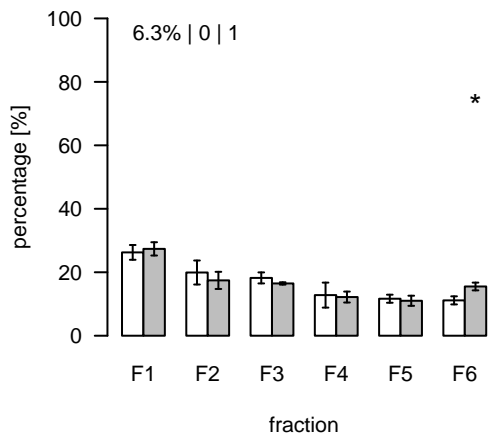

**L2138 (m/z=817.642509; rt=10.58553)**  
T/S Cluster: L-10.6-2

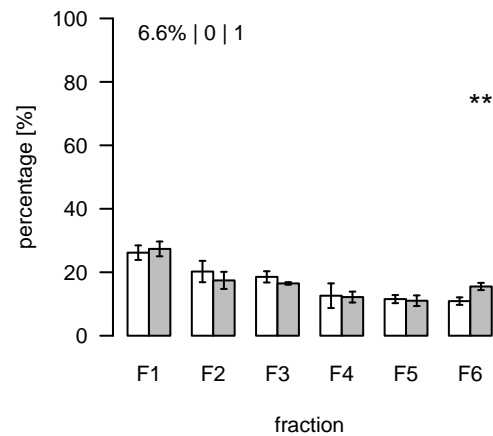

**L2134 (m/z=818.666694; rt=10.58444)**  
T/S Cluster: L-10.6-2

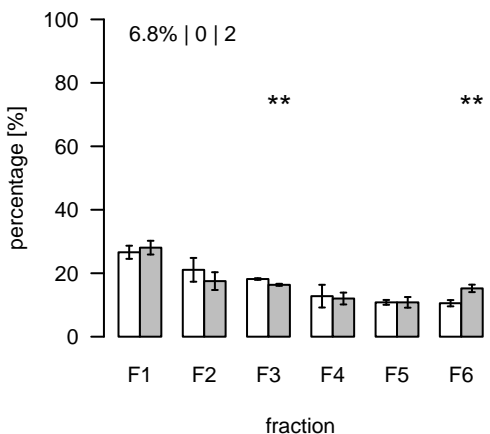

**L2137 (m/z=408.331242; rt=10.58535)**  
T/S Cluster: L-10.6-2

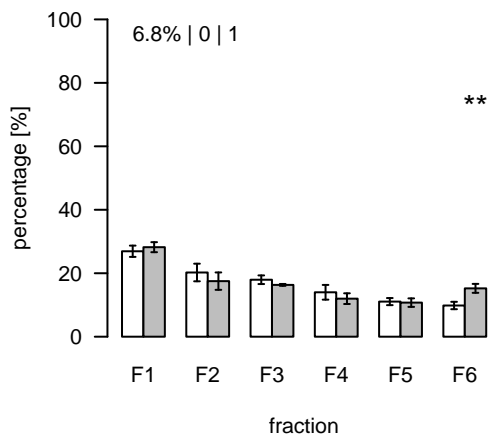

**L2140 (m/z=429.852138; rt=10.60934)**  
T/S Cluster: L-10.6-3

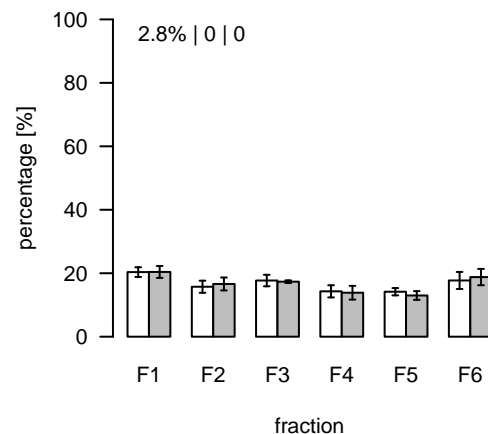

**L2156 (m/z=842.677186; rt=10.61318)**  
T/S Cluster: L-10.6-4

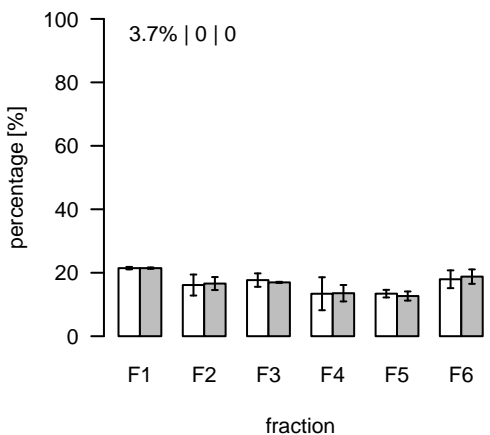

**L2160 (m/z=842.646601; rt=10.61369)**  
T/S Cluster: L-10.6-4

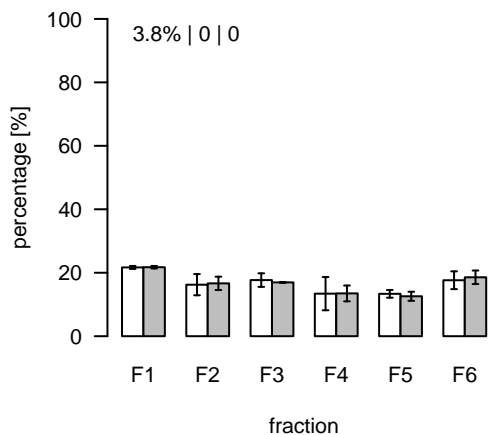

**L2155 (m/z=843.679461; rt=10.61315)**  
T/S Cluster: L-10.6-4

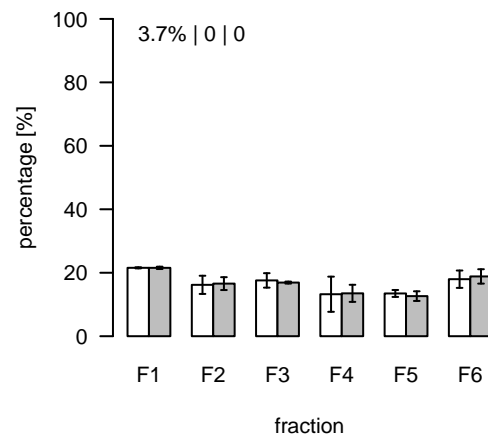

**L2161 (m/z=843.645948; rt=10.61375)**  
T/S Cluster: L-10.6-4

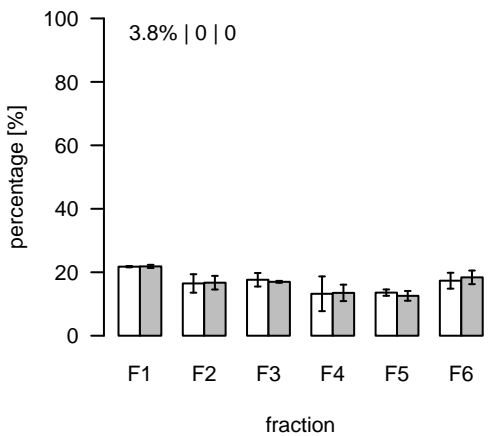

**L2154 (m/z=844.686747; rt=10.61311)**  
T/S Cluster: L-10.6-4

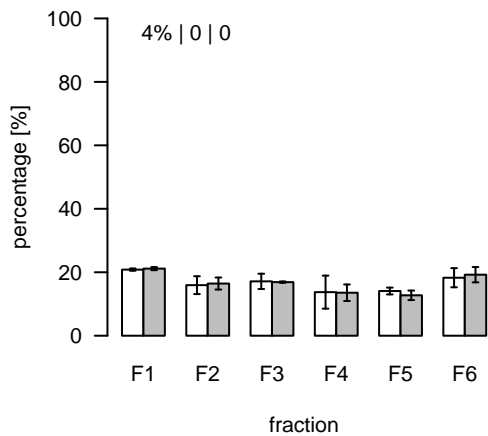

**L2144 (m/z=859.708215; rt=10.61191)**  
T/S Cluster: L-10.6-4

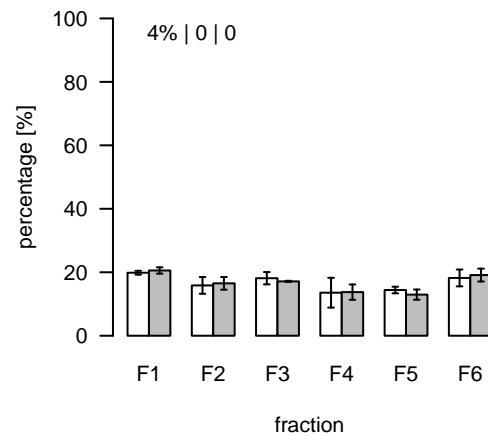

**L2159 (m/z=844.661909; rt=10.61359)**  
T/S Cluster: L-10.6-4

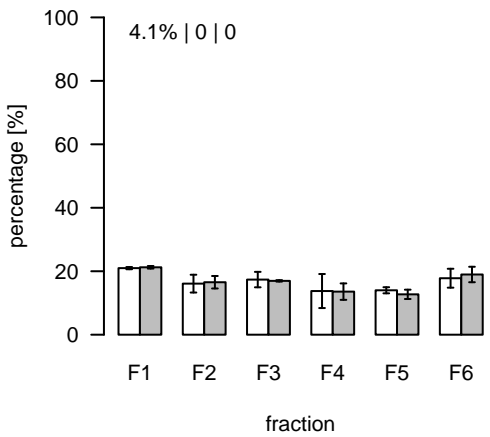

**L2149 (m/z=859.684547; rt=10.61244)**  
T/S Cluster: L-10.6-4

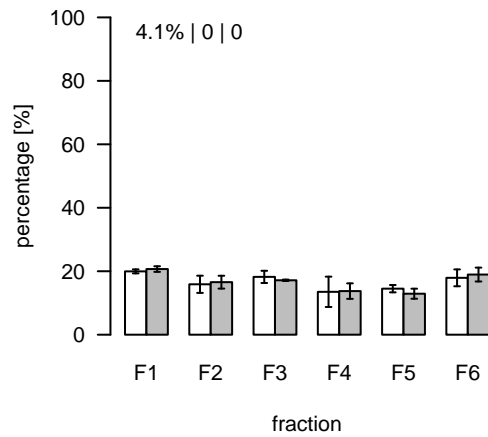

**L2151 (m/z=421.342985; rt=10.6127)**  
T/S Cluster: L-10.6-4

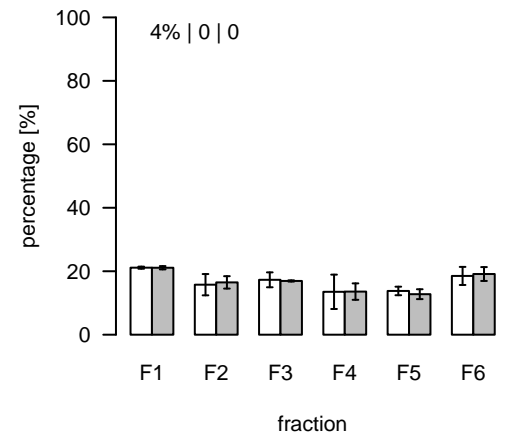

**L2158 (m/z=421.336095; rt=10.61354)**  
T/S Cluster: L-10.6-4

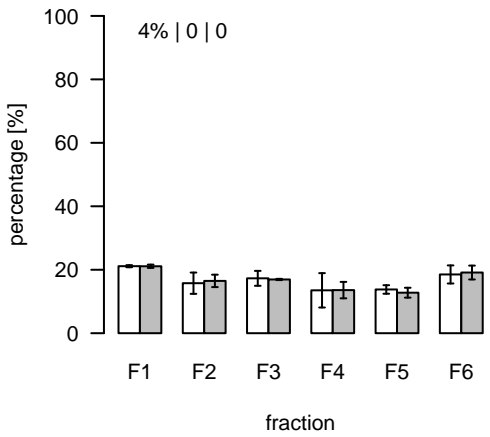

**L2147 (m/z=860.705754; rt=10.6122)**  
T/S Cluster: L-10.6-4

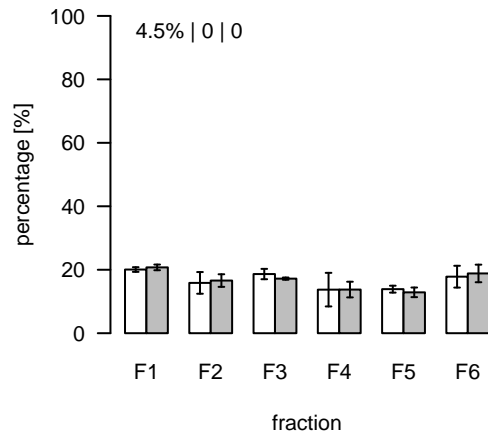

**L2157 (m/z=421.838724; rt=10.61345)**  
T/S Cluster: L-10.6-4

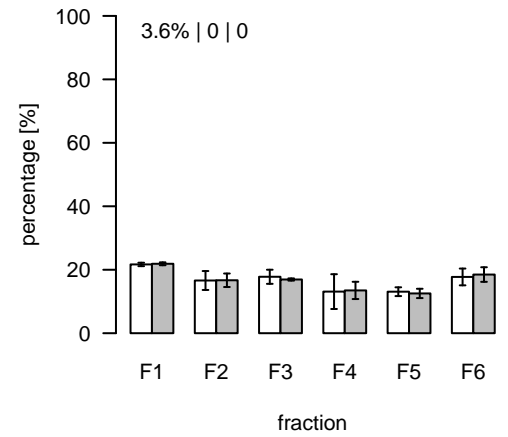

**L2150 (m/z=421.845743; rt=10.6126)**  
T/S Cluster: L-10.6-4

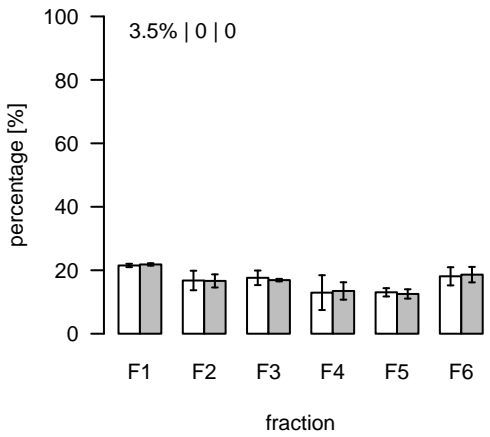

**L2145 (m/z=680.621903; rt=10.612)**  
T/S Cluster: L-10.6-4

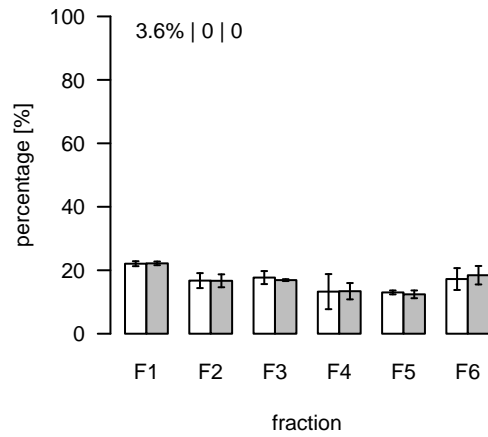

**L2153 (m/z=280.894936; rt=10.61293)**  
T/S Cluster: L-10.6-4

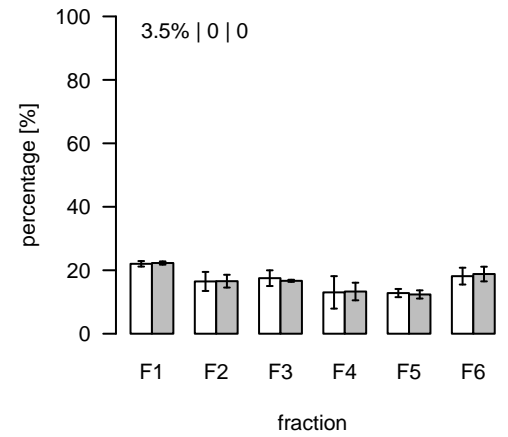

**L2143 (m/z=280.897606; rt=10.61167)**  
T/S Cluster: L-10.6-4

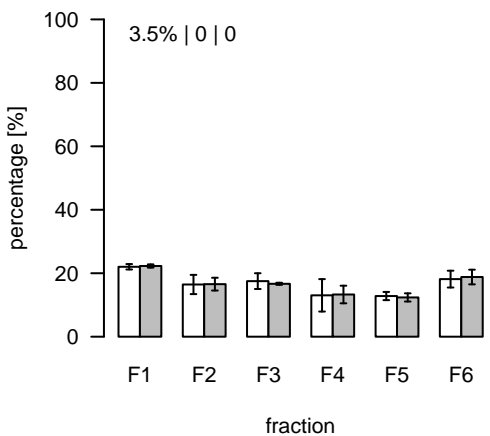

**L2152 (m/z=845.685354; rt=10.6128)**  
T/S Cluster: L-10.6-4

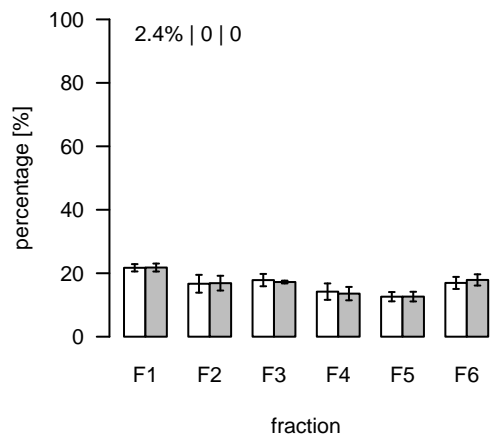

**L2146 (m/z=281.230489; rt=10.61202)**  
T/S Cluster: L-10.6-4

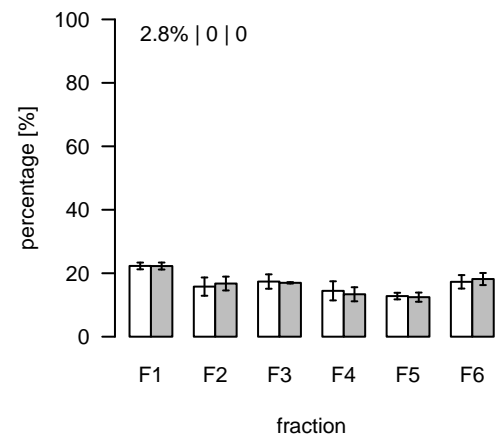

**L2141 (m/z=681.625376; rt=10.6102)**  
T/S Cluster: L-10.6-4

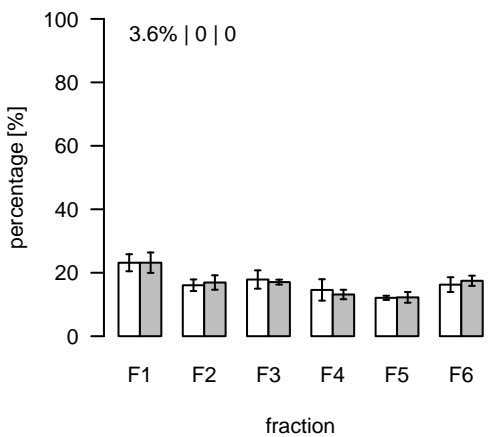

**L2148 (m/z=422.342082; rt=10.61227)**  
T/S Cluster: L-10.6-4

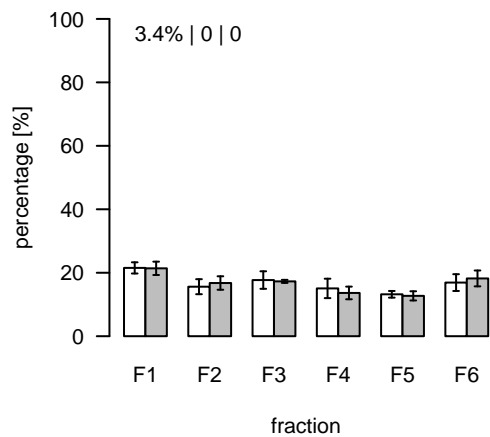

**L2142 (m/z=861.709267; rt=10.61043)**  
T/S Cluster: L-10.6-5

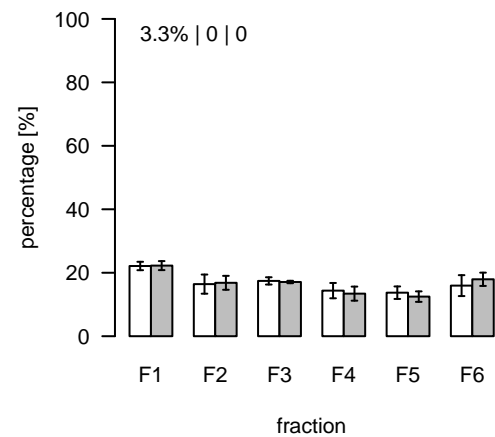

**L2162 (m/z=885.557587; rt=10.62392)**  
T/S Cluster: L-10.6-6

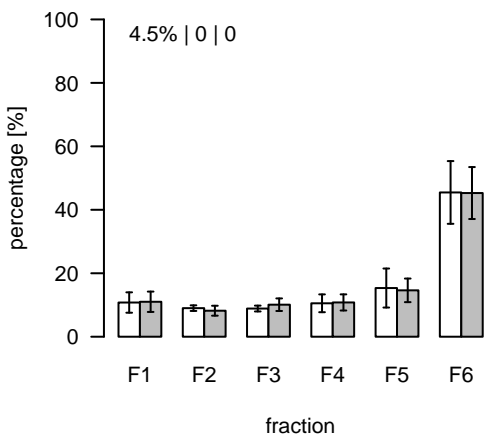

**L2166 (m/z=885.559112; rt=10.63502)**  
T/S Cluster: L-10.6-6

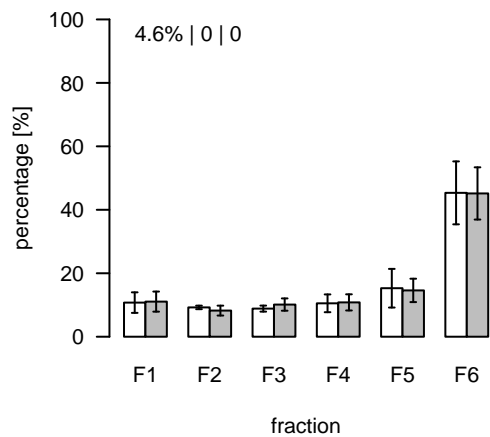

**L2165 (m/z=885.527409; rt=10.63452)**  
T/S Cluster: L-10.6-6

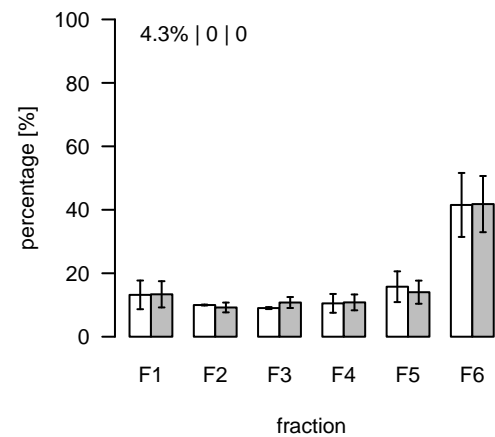

**L2164** (m/z=864.65724; rt=10.62534)  
T/S Cluster: L-10.6-7

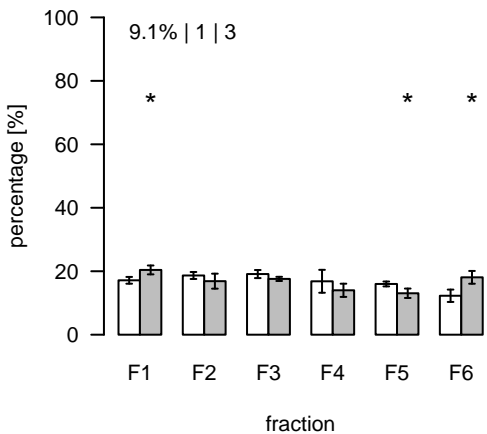

**L2163** (m/z=865.660386; rt=10.62507)  
T/S Cluster: L-10.6-7

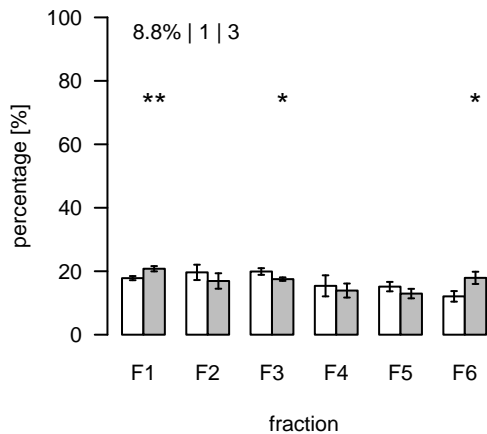

**L2167** (m/z=952.592657; rt=10.64721)  
T/S Cluster: L-10.6-8

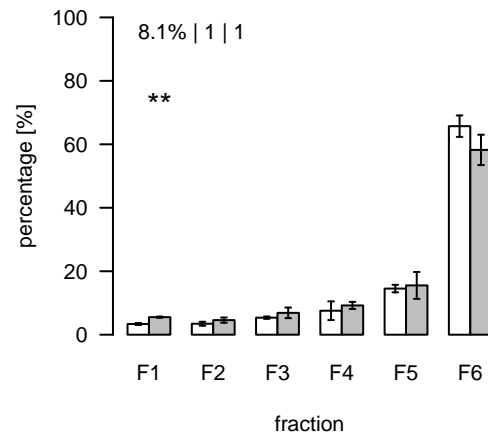

**L2172** (m/z=844.681612; rt=10.66243)  
T/S Cluster: L-10.7-1

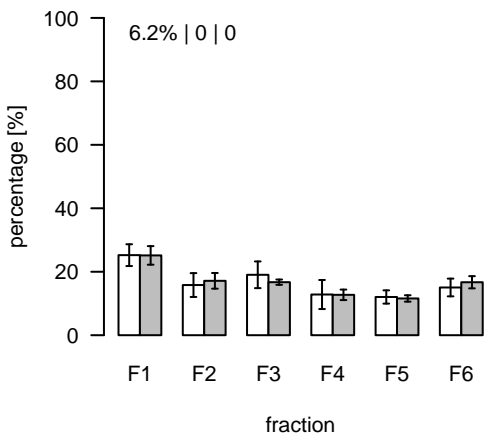

**L2170** (m/z=859.701981; rt=10.66193)  
T/S Cluster: L-10.7-1

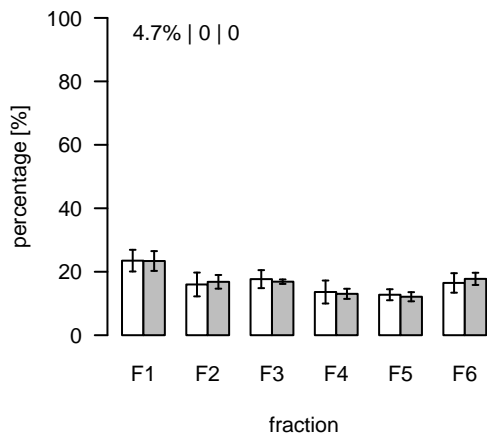

**L2171** (m/z=421.840377; rt=10.66197)  
T/S Cluster: L-10.7-1

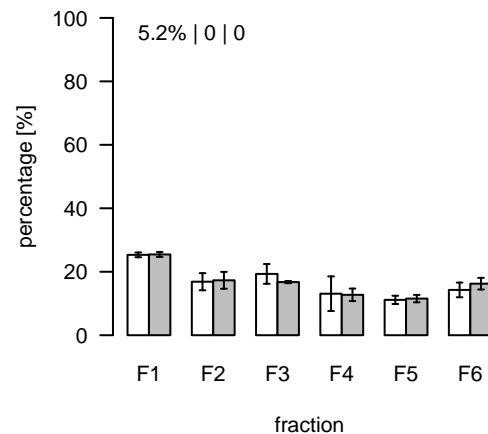

**L2169** (m/z=860.676182; rt=10.66104)  
T/S Cluster: L-10.7-1

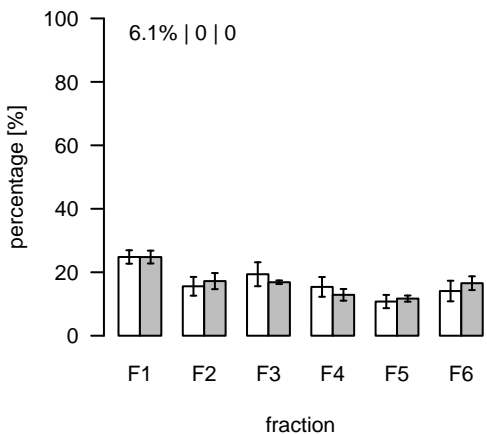

**L2168** (m/z=280.895821; rt=10.6605)  
T/S Cluster: L-10.7-1

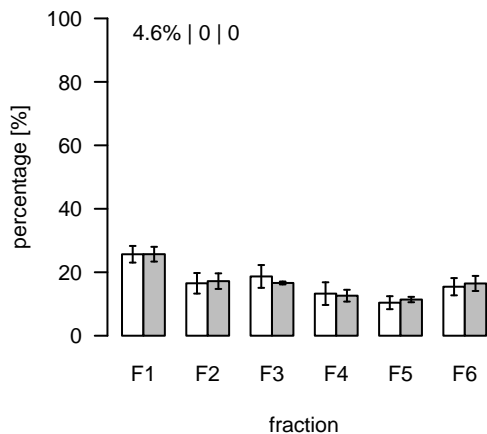

**L2174** (m/z=951.593786; rt=10.68369)  
T/S Cluster: L-10.7-2

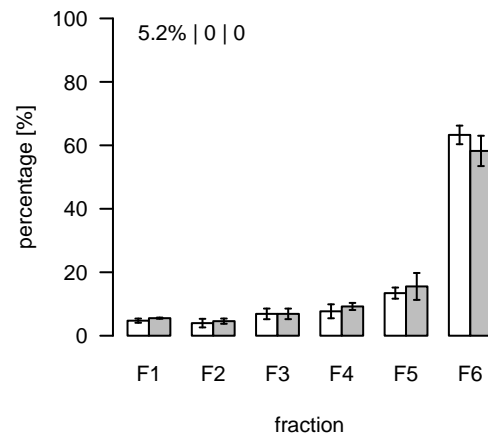



**L2178 (m/z=951.563823; rt=10.68433)**  
T/S Cluster: L-10.7-2

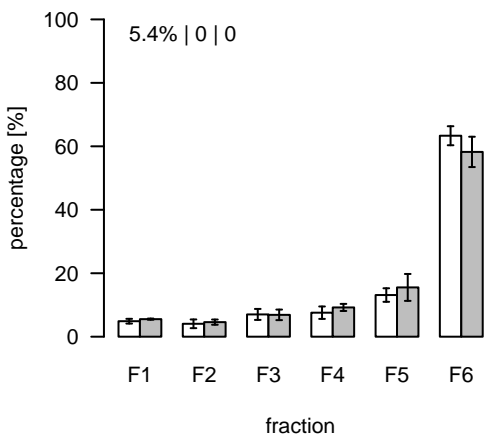

**L2173 (m/z=952.593166; rt=10.68356)**  
T/S Cluster: L-10.7-2

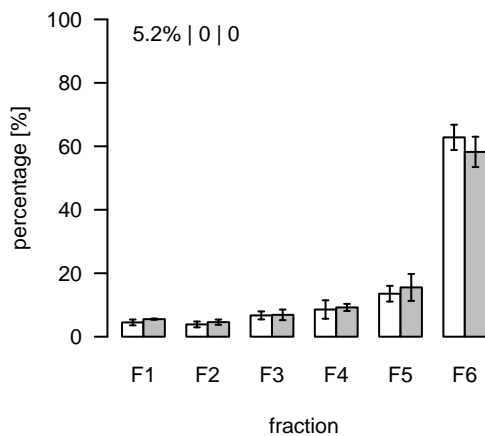

**L2176 (m/z=891.531517; rt=10.68383)**  
T/S Cluster: L-10.7-2

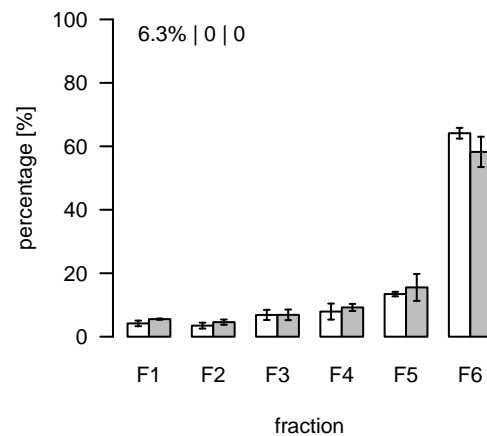

**L2175 (m/z=891.510183; rt=10.68379)**  
T/S Cluster: L-10.7-2

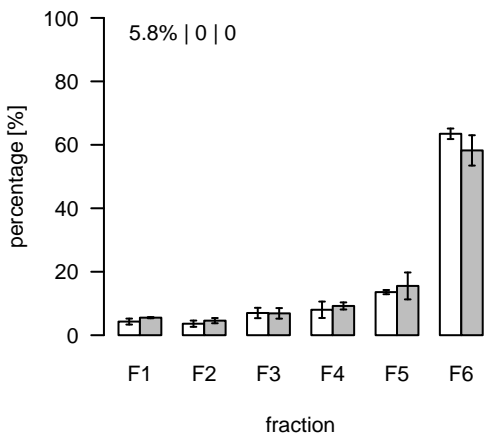

**L2177 (m/z=952.555255; rt=10.68411)**  
T/S Cluster: L-10.7-2

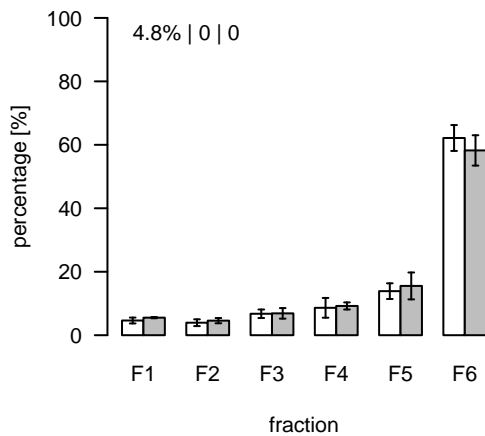

**L2179 (m/z=892.531985; rt=10.68473)**  
T/S Cluster: L-10.7-2

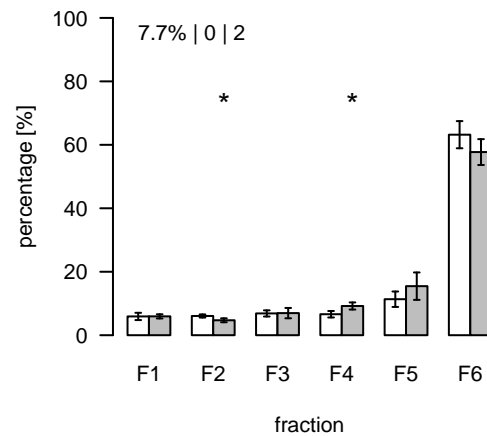

**L2181 (m/z=953.594068; rt=10.68831)**  
T/S Cluster: L-10.7-2

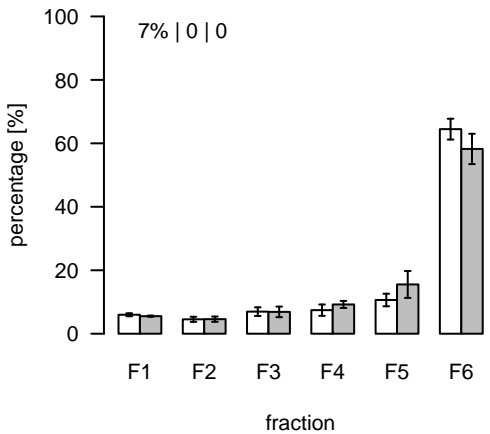

**L2180 (m/z=953.564452; rt=10.68731)**  
T/S Cluster: L-10.7-2

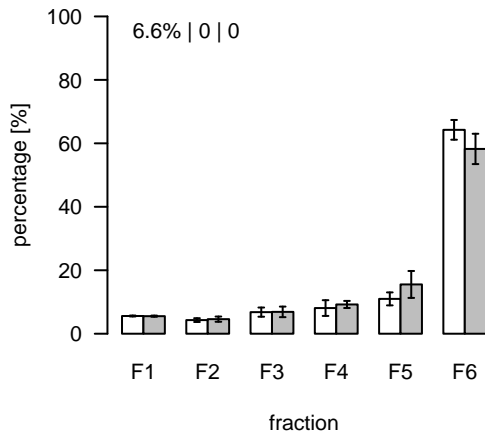

**L2183 (m/z=788.62321; rt=10.74725)**  
T/S Cluster: L-10.7-3

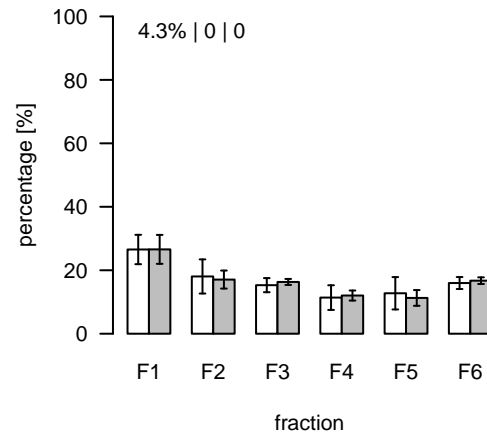

**L2182 (m/z=788.601513; rt=10.7472)**  
T/S Cluster: L-10.7-3

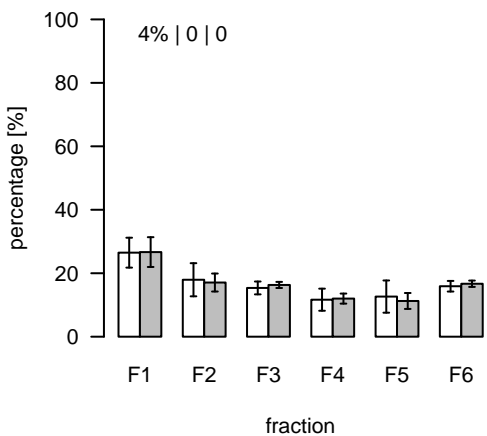

**L2184 (m/z=789.622576; rt=10.74727)**  
T/S Cluster: L-10.7-3

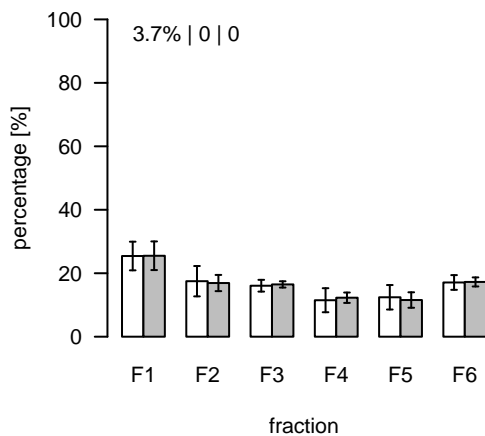

**L2186 (m/z=915.537338; rt=10.91521)**  
T/S Cluster: L-10.9-1

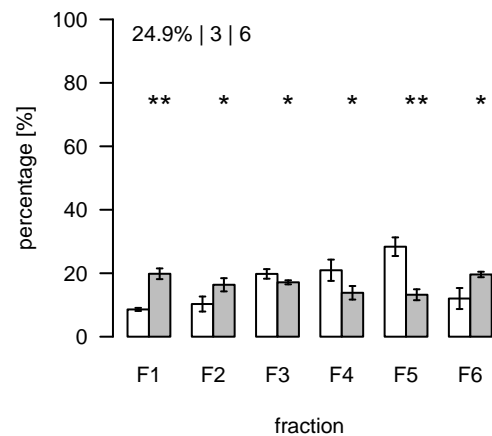

**L2187 (m/z=915.528375; rt=10.91526)**  
T/S Cluster: L-10.9-1

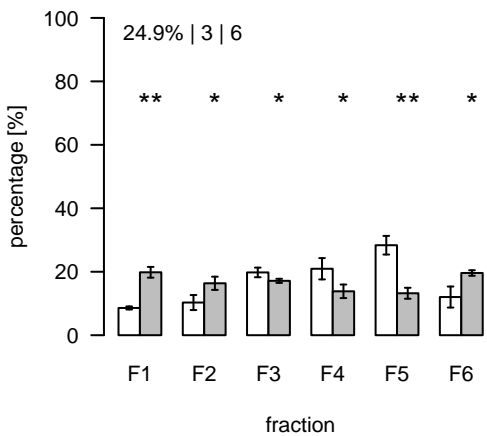

**L2189 (m/z=916.530999; rt=10.91551)**  
T/S Cluster: L-10.9-1

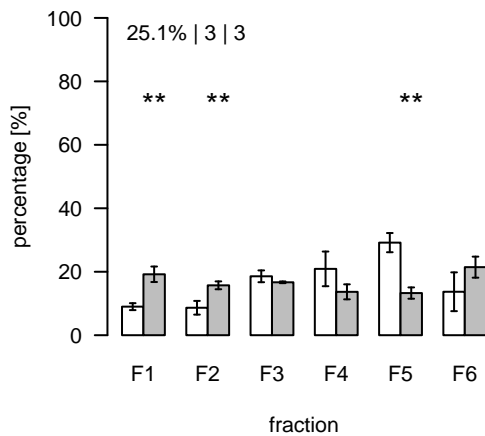

**L2190 (m/z=916.547825; rt=10.91556)**  
T/S Cluster: L-10.9-1

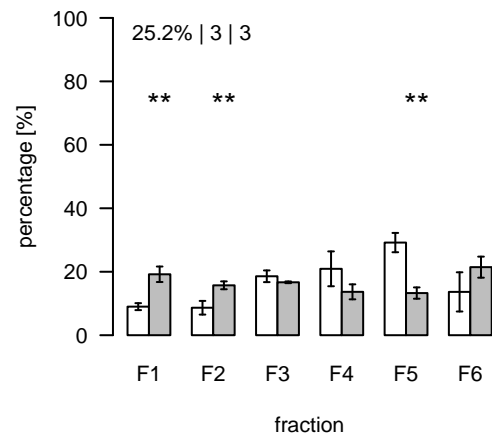

**L2188 (m/z=916.561872; rt=10.91533)**  
T/S Cluster: L-10.9-1

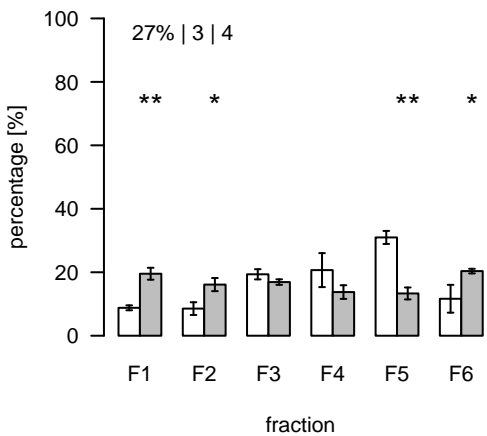

**L2185 (m/z=915.582435; rt=10.91437)**  
T/S Cluster: L-10.9-1

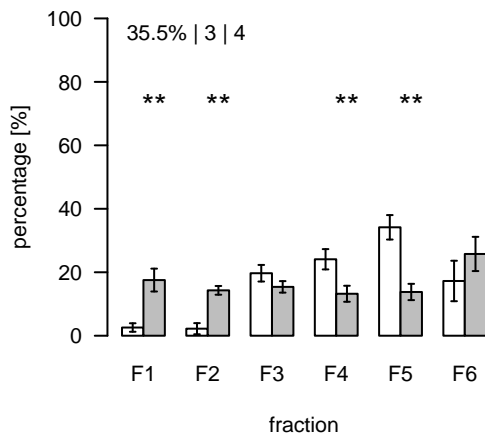

**L2202 (m/z=893.54611; rt=10.91704)**  
T/S Cluster: L-10.9-2

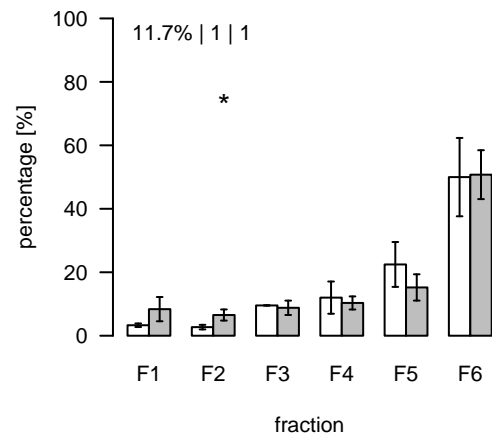

**L2199 (m/z=894.548975; rt=10.91685)**  
T/S Cluster: L-10.9-2

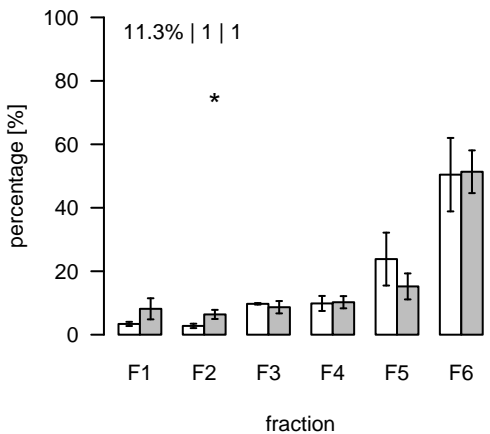

**L2194 (m/z=895.549818; rt=10.91662)**  
T/S Cluster: L-10.9-2

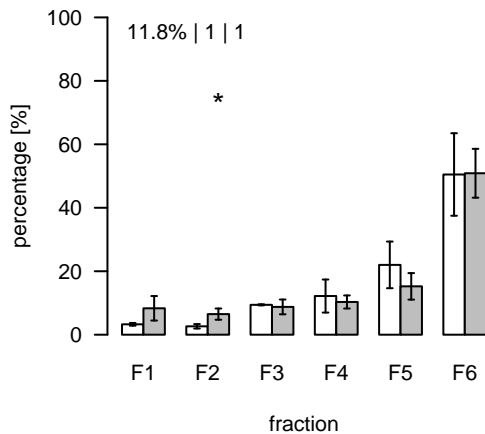

**L2193 (m/z=896.551648; rt=10.91644)**  
T/S Cluster: L-10.9-2

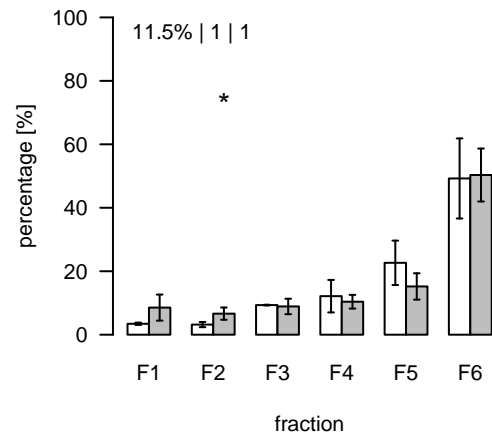

**L2200 (m/z=446.774484; rt=10.9169)**  
T/S Cluster: L-10.9-2

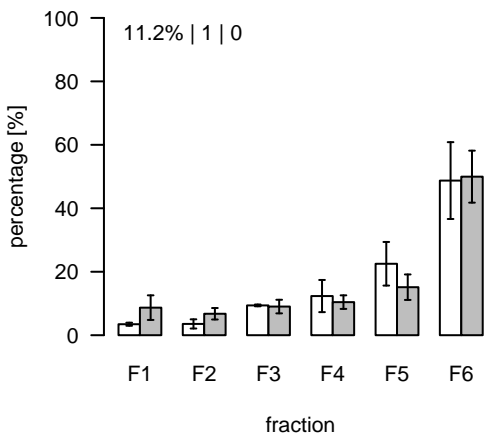

**L2196 (m/z=895.496725; rt=10.91665)**  
T/S Cluster: L-10.9-2

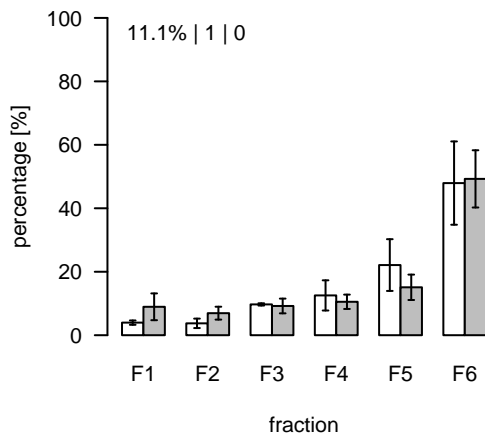

**L2192 (m/z=896.526116; rt=10.91643)**  
T/S Cluster: L-10.9-2

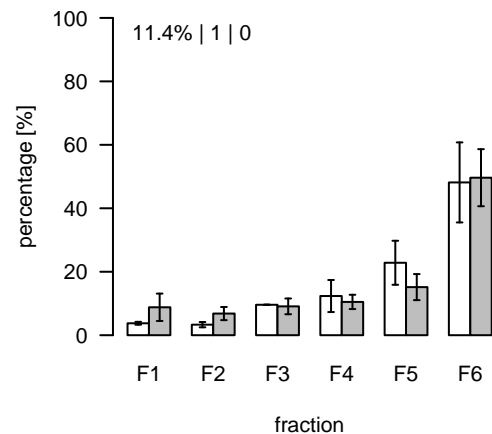

**L2203 (m/z=893.474686; rt=10.91718)**  
T/S Cluster: L-10.9-2

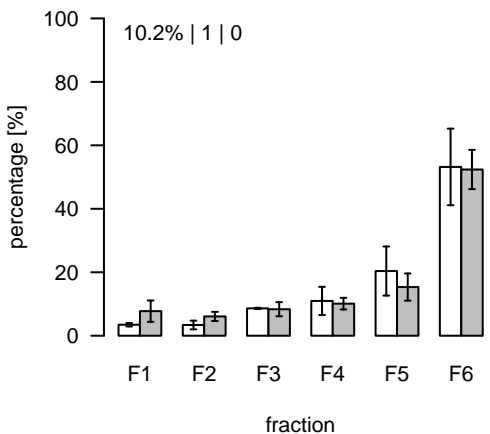

**L2201 (m/z=894.48373; rt=10.91697)**  
T/S Cluster: L-10.9-2

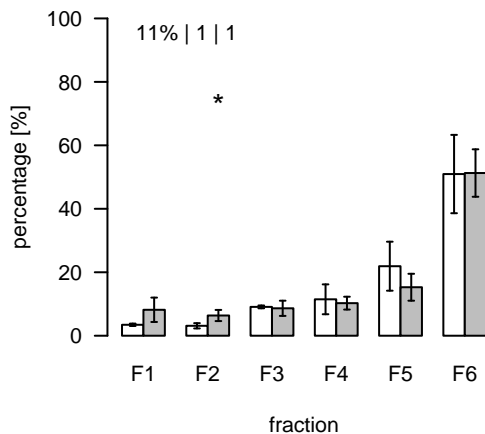

**L2195 (m/z=447.276219; rt=10.91665)**  
T/S Cluster: L-10.9-2

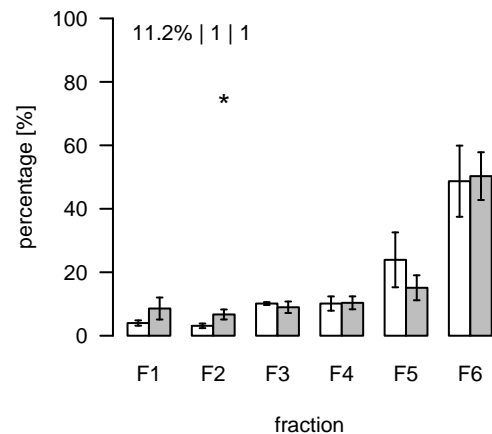

**L2197 (m/z=447.272859; rt=10.9167)**  
T/S Cluster: L-10.9-2

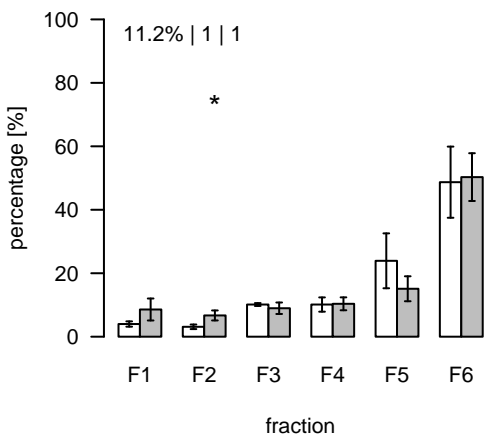

**L2198 (m/z=447.280443; rt=10.91674)**  
T/S Cluster: L-10.9-2

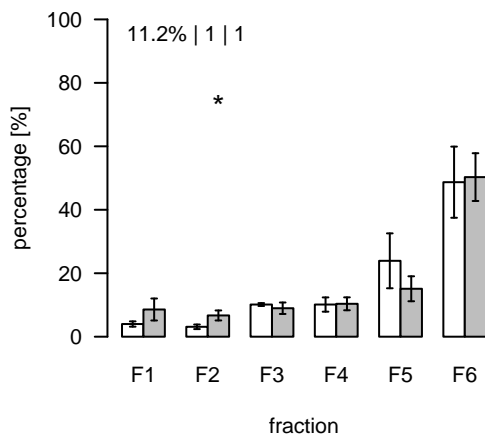

**L2204 (m/z=892.540787; rt=10.92287)**  
T/S Cluster: L-10.9-2

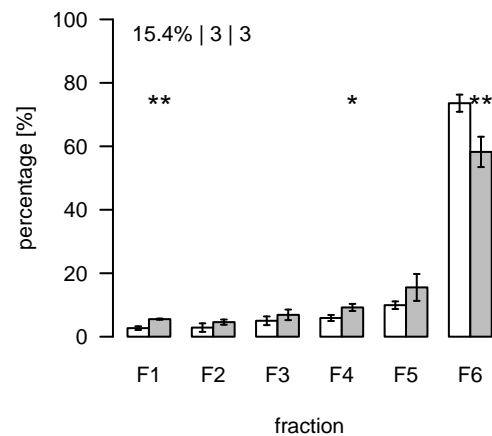

**L2191 (m/z=895.617553; rt=10.91627)**  
T/S Cluster: L-10.9-2

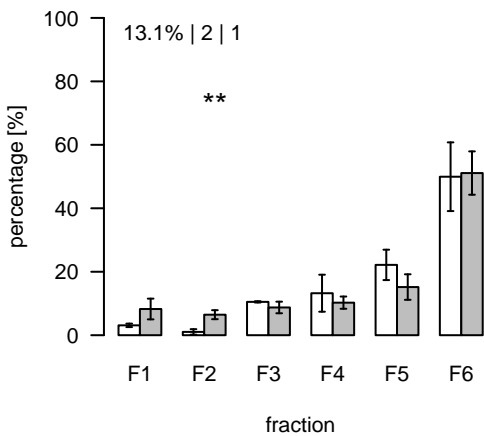

**L2205 (m/z=565.568501; rt=10.95051)**  
T/S Cluster: L-11-1

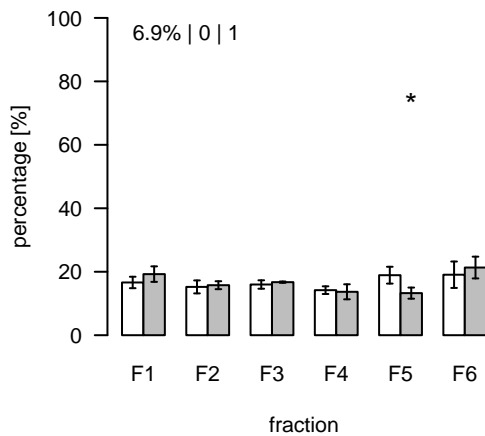

**L2209 (m/z=869.562042; rt=11.0044)**  
T/S Cluster: L-11-2

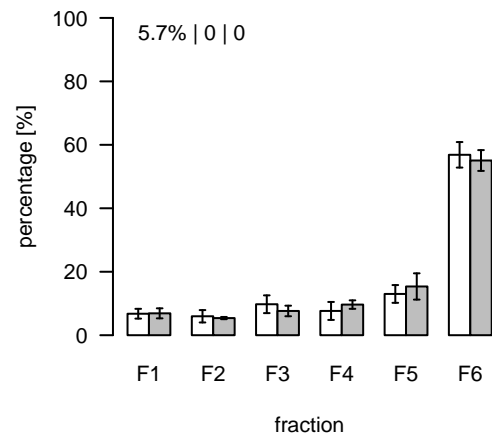

**L2218 (m/z=885.558613; rt=11.0276)**  
T/S Cluster: L-11-2

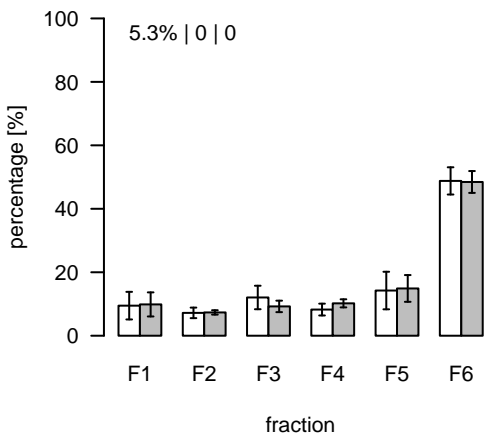

**L2210 (m/z=870.565836; rt=11.00451)**  
T/S Cluster: L-11-2

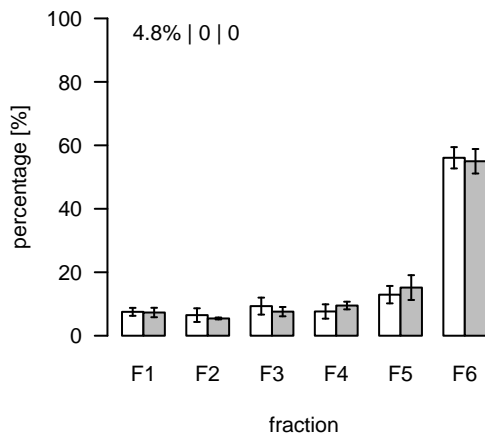

**L2219 (m/z=885.525981; rt=11.02765)**  
T/S Cluster: L-11-2

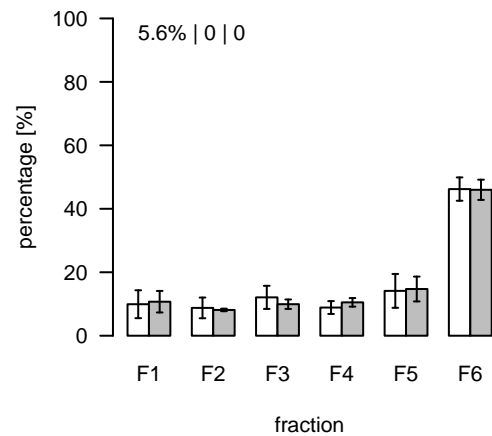

**L2212 (m/z=869.522576; rt=11.00475)**  
T/S Cluster: L-11-2

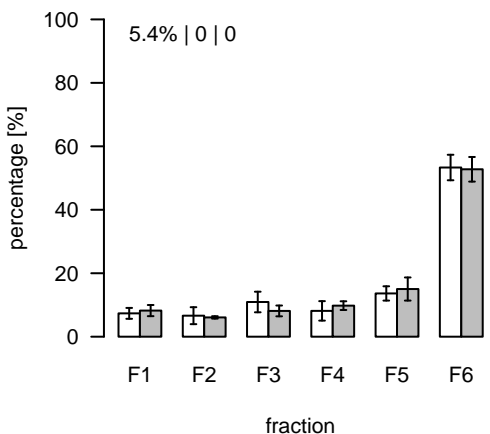

**L2217 (m/z=886.56205; rt=11.02721)**  
T/S Cluster: L-11-2

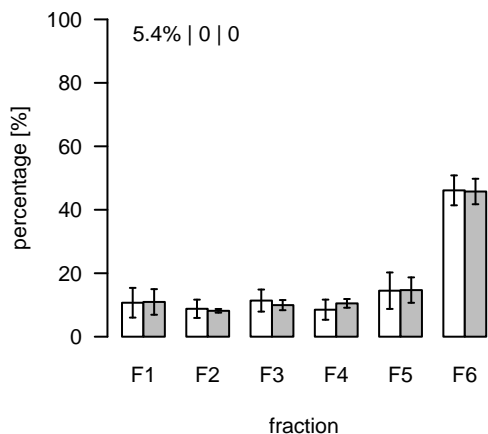

**L2211 (m/z=870.531041; rt=11.00461)**  
T/S Cluster: L-11-2

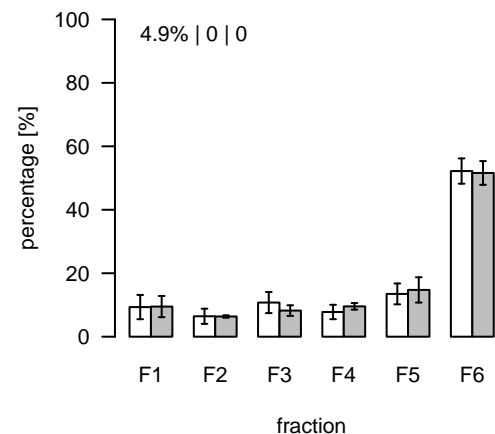

**L2216 (m/z=886.533728; rt=11.02704)**  
T/S Cluster: L-11-2

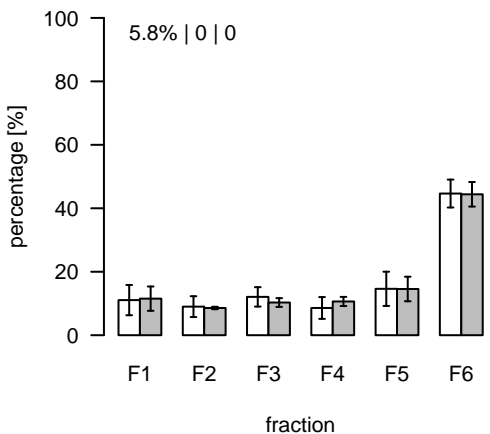

**L2215 (m/z=871.573544; rt=11.0261)**  
T/S Cluster: L-11-2

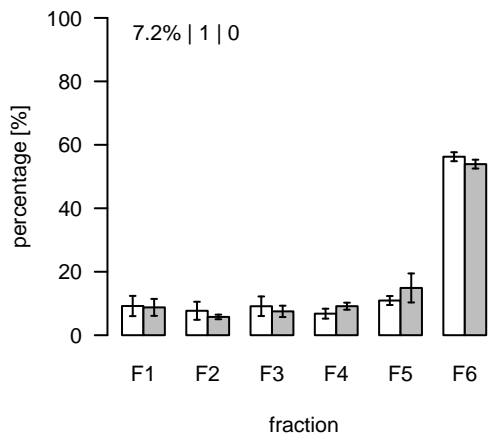

**L2214 (m/z=871.541898; rt=11.02125)**  
T/S Cluster: L-11-2

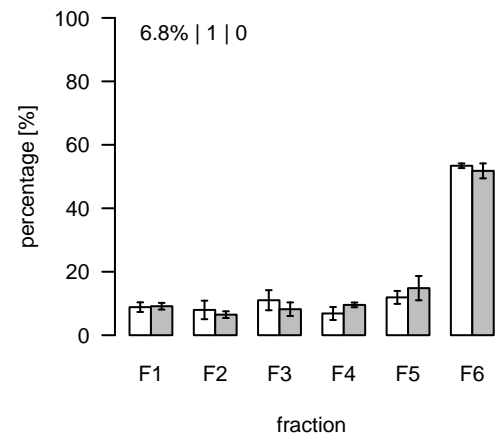

**L2206 (m/z=871.554102; rt=10.979)**  
T/S Cluster: L-11-2

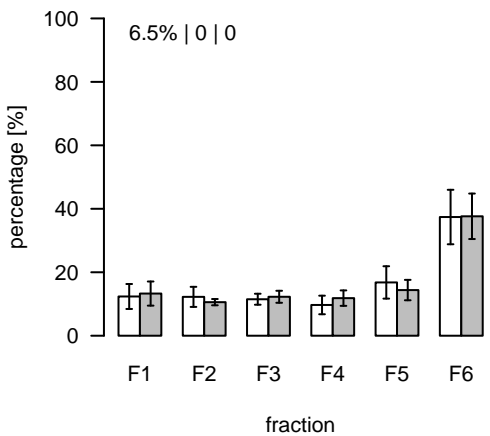

**L2207 (m/z=887.57153; rt=10.98277)**  
T/S Cluster: L-11-3

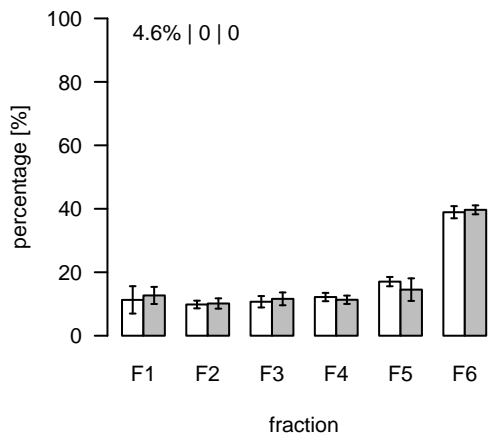

**L2208 (m/z=887.543936; rt=10.99707)**  
T/S Cluster: L-11-3

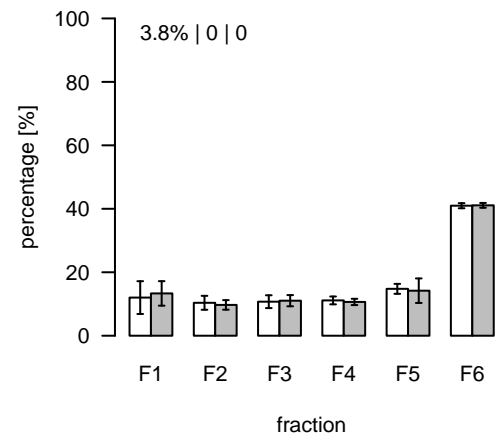

**L2213 (m/z=887.564262; rt=11.01662)**  
T/S Cluster: L-11-3

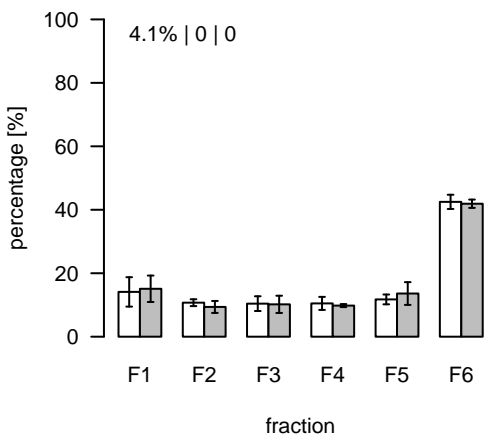

**L2222 (m/z=842.649935; rt=11.04041)**  
T/S Cluster: L-11-4

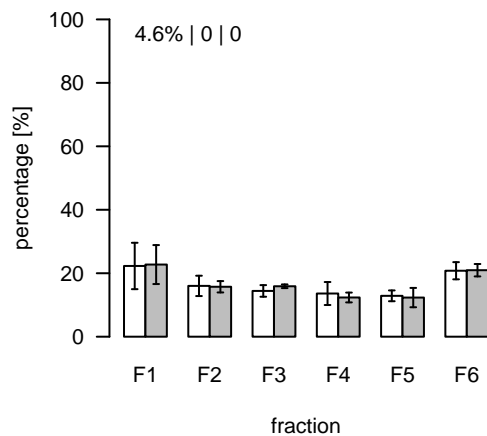

**L2220 (m/z=842.675239; rt=11.03921)**  
T/S Cluster: L-11-4

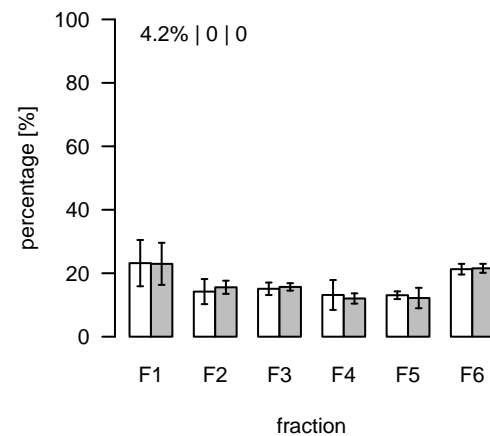

**L2221 (m/z=842.675114; rt=11.03968)**  
T/S Cluster: L-11-4

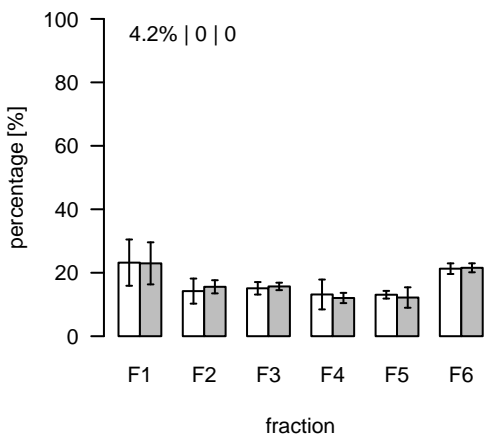

**L2223 (m/z=899.577397; rt=11.0758)**  
T/S Cluster: L-11.1-1

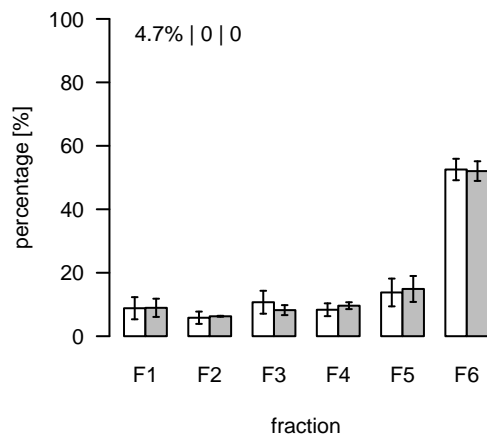

**L2224 (m/z=899.552683; rt=11.07588)**  
T/S Cluster: L-11.1-1

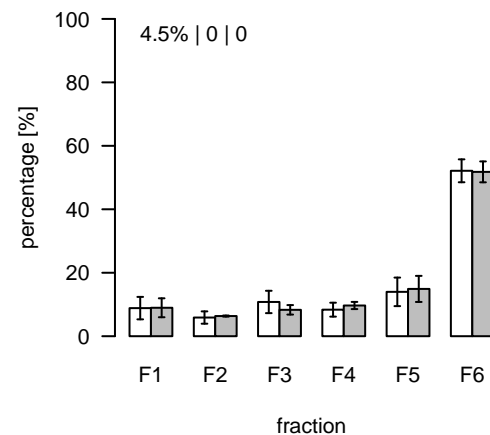

**L2227 (m/z=856.690885; rt=11.16117)**  
T/S Cluster: L-11.2-1

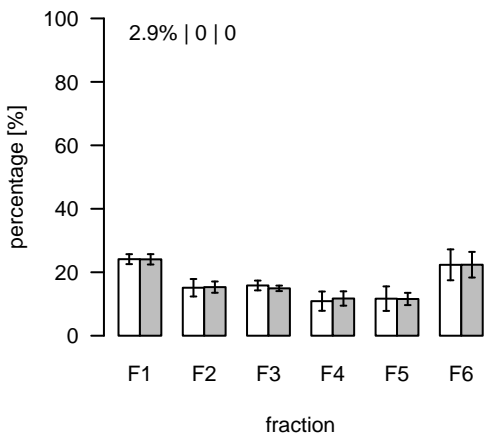

**L2226 (m/z=857.694074; rt=11.15873)**  
T/S Cluster: L-11.2-1

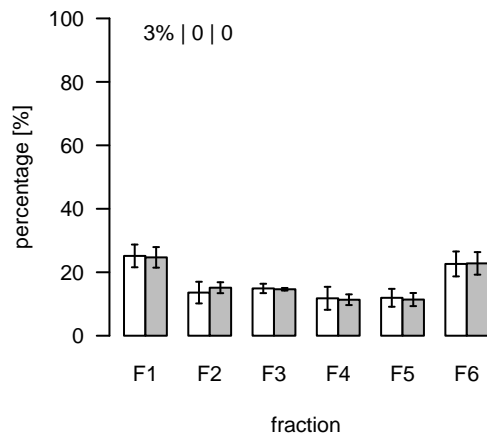

**L2225 (m/z=830.675648; rt=11.15537)**  
T/S Cluster: L-11.2-1

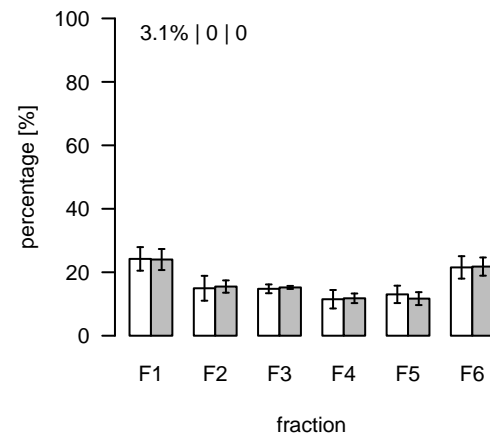

**L2229 (m/z=903.567442; rt=11.231)**  
T/S Cluster: L-11.2-2

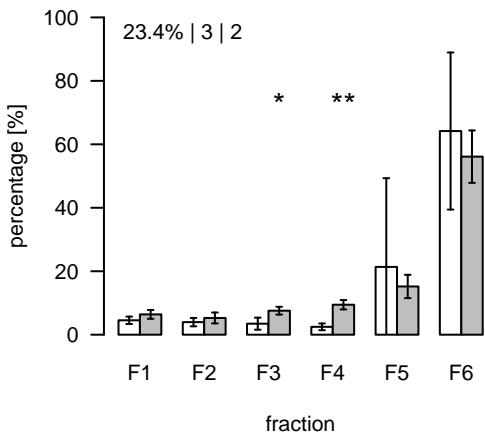

**L2228 (m/z=904.570561; rt=11.23078)**  
T/S Cluster: L-11.2-2

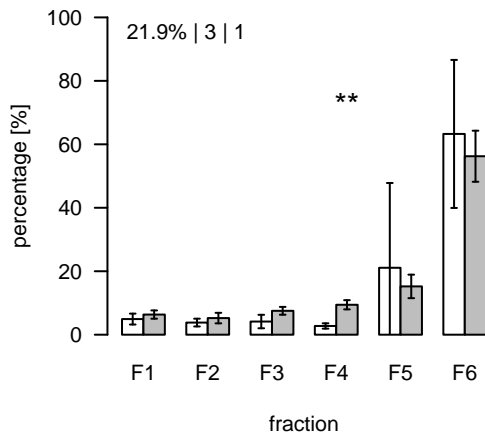

**L2230 (m/z=654.606529; rt=11.2856)**  
T/S Cluster: L-11.3-1

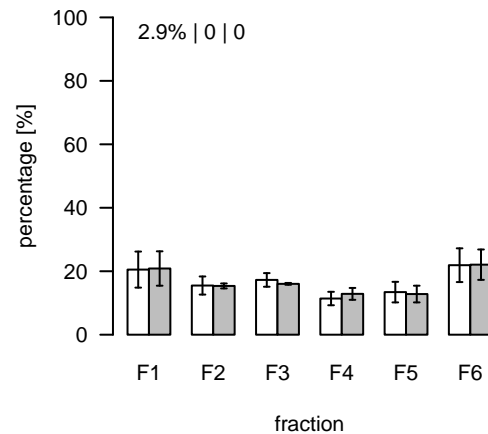

**L2383 (m/z=1348.900823; rt=11.32924)**  
T/S Cluster: L-11.3-2

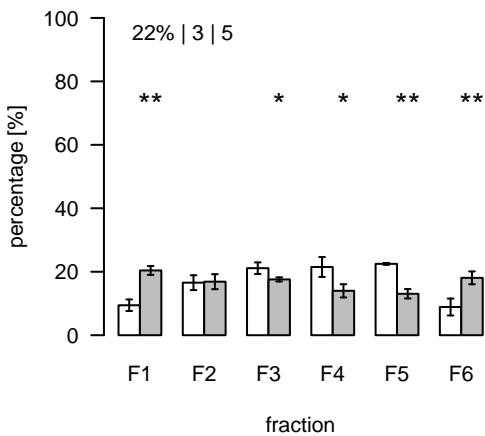

**L2381 (m/z=1347.899099; rt=11.32906)**  
T/S Cluster: L-11.3-2

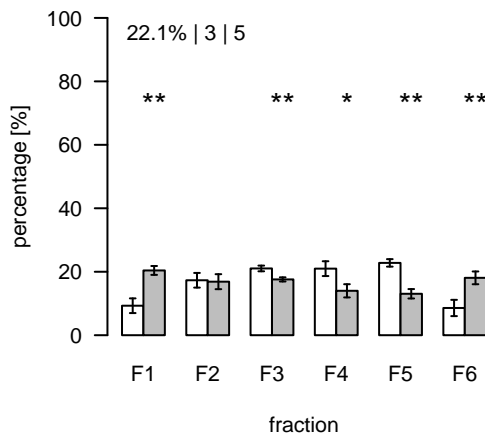

**L2378 (m/z=1347.810842; rt=11.32904)**  
T/S Cluster: L-11.3-2

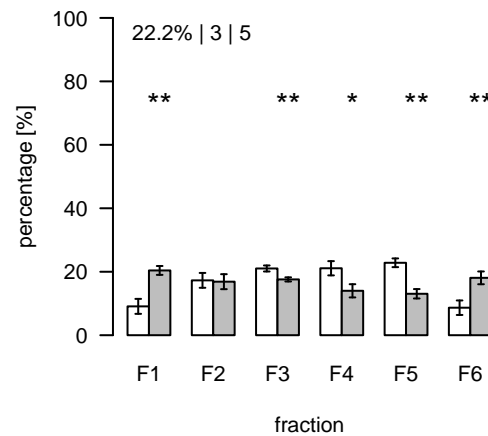

**L2350 (m/z=1349.909259; rt=11.32854)**  
T/S Cluster: L-11.3-2

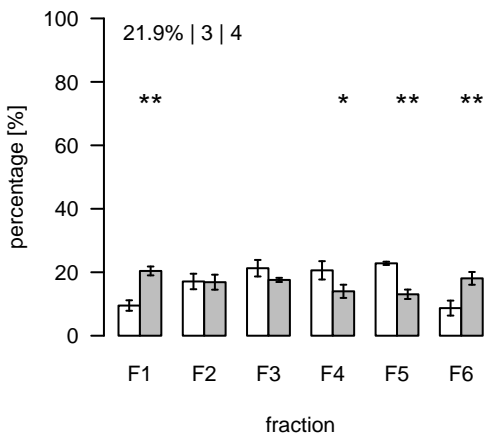

**L2360 (m/z=1364.8772; rt=11.3286)**  
T/S Cluster: L-11.3-2

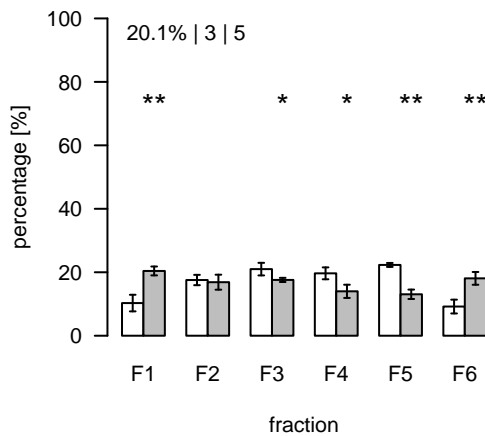

**L2339 (m/z=1349.838924; rt=11.32844)**  
T/S Cluster: L-11.3-2

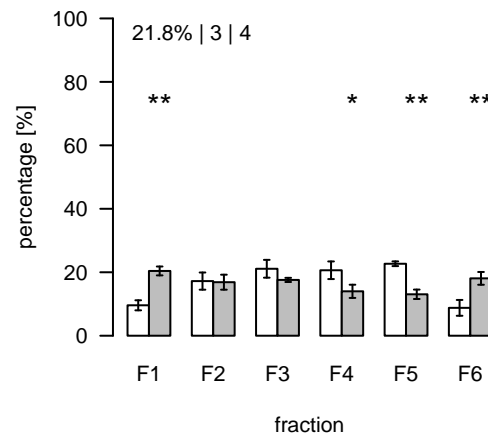

**L2366 (m/z=1363.871541; rt=11.32867)**  
T/S Cluster: L-11.3-2

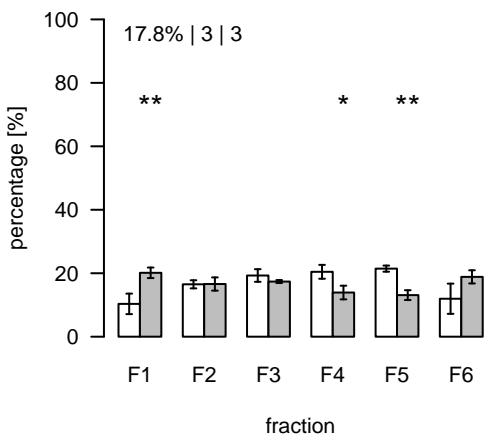

**L2382 (m/z=1348.772195; rt=11.32918)**  
T/S Cluster: L-11.3-2

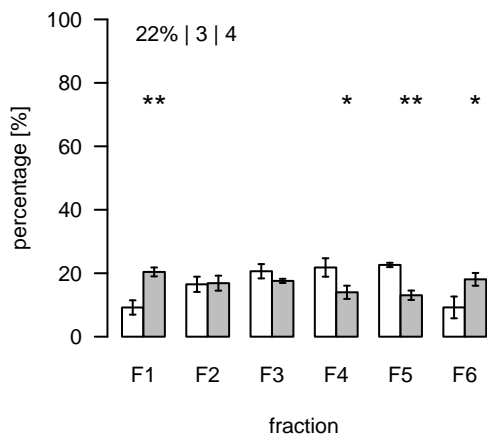

**L2231 (m/z=1364.876543; rt=11.30551)**  
T/S Cluster: L-11.3-2

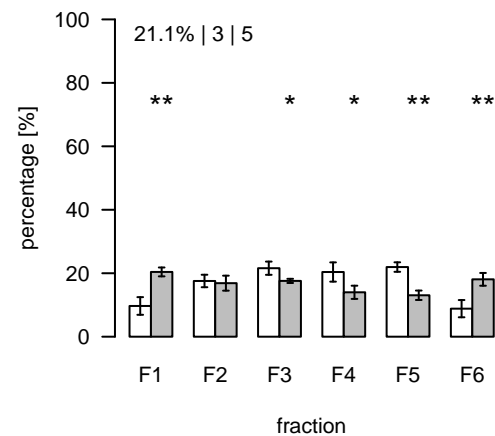

**L2355 (m/z=1356.959201; rt=11.32856)**  
T/S Cluster: L-11.3-2

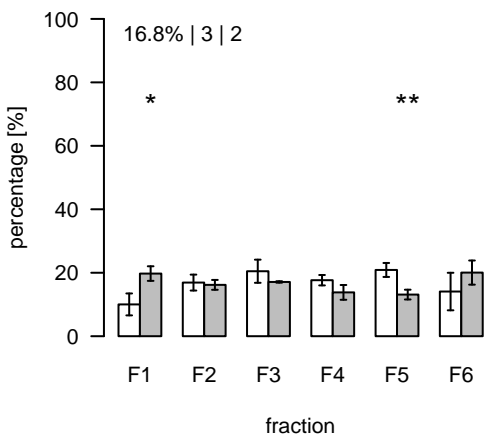

**L2344 (m/z=1364.795519; rt=11.3285)**  
T/S Cluster: L-11.3-2

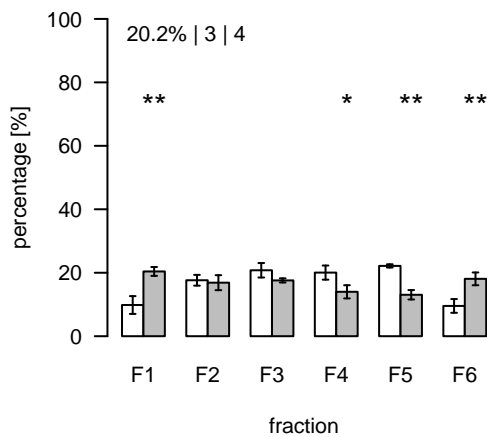

**L2274 (m/z=1412.996974; rt=11.32776)**  
T/S Cluster: L-11.3-2

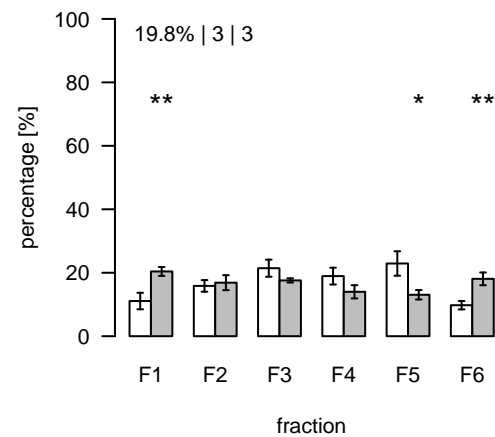

**L2347 (m/z=1365.878902; rt=11.32853)**  
T/S Cluster: L-11.3-2

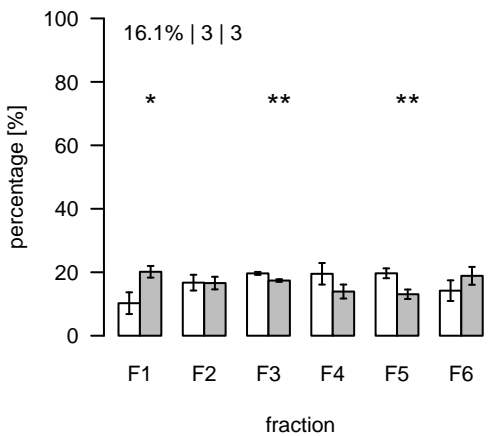

**L2313 (m/z=1350.910817; rt=11.32818)**  
T/S Cluster: L-11.3-2

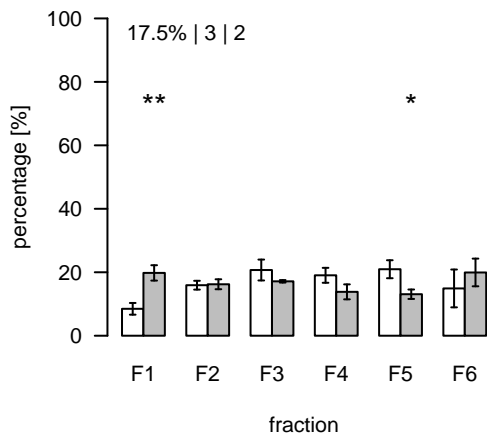

**L2308 (m/z=1413.991798; rt=11.32814)**  
T/S Cluster: L-11.3-2

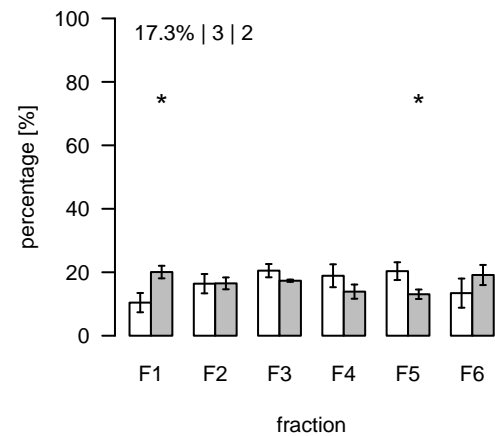



**L2253 (m/z=1358.965315; rt=11.32752)**  
T/S Cluster: L-11.3-2

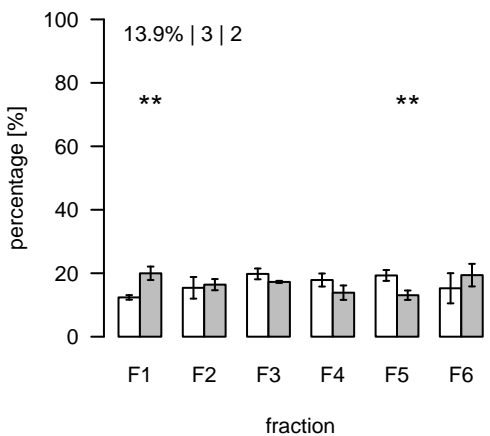

**L2372 (m/z=673.950707; rt=11.3288)**  
T/S Cluster: L-11.3-2

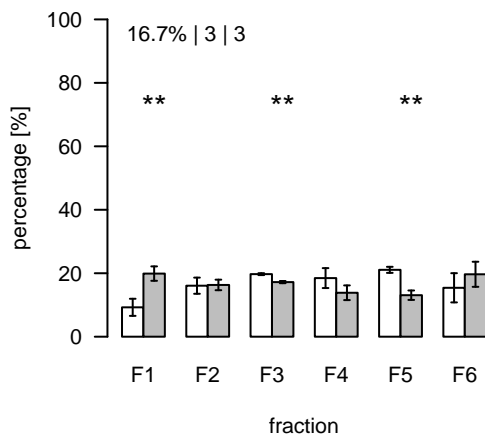

**L2232 (m/z=551.634468; rt=11.30635)**  
T/S Cluster: L-11.3-3

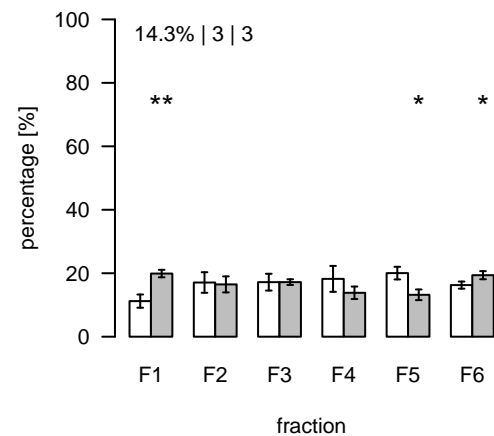

**L2291 (m/z=680.482822; rt=11.32794)**  
T/S Cluster: L-11.3-4

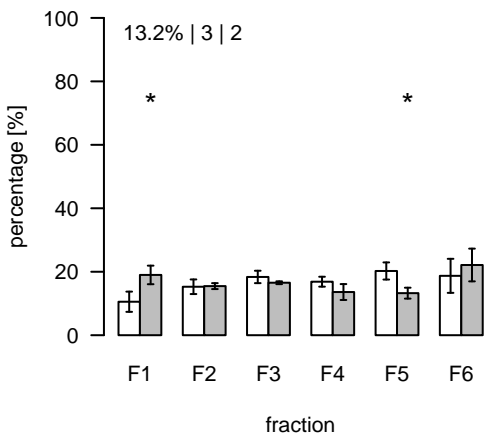

**L2277 (m/z=681.486801; rt=11.32778)**  
T/S Cluster: L-11.3-4

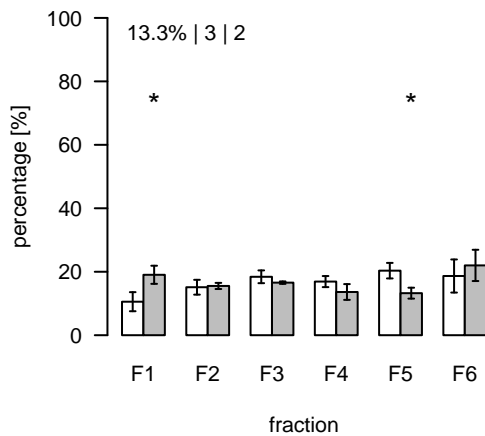

**L2303 (m/z=663.457901; rt=11.32804)**  
T/S Cluster: L-11.3-4

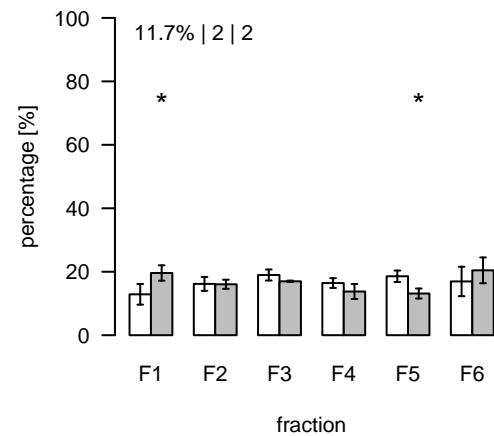

**L2296 (m/z=680.44165; rt=11.32798)**  
T/S Cluster: L-11.3-4

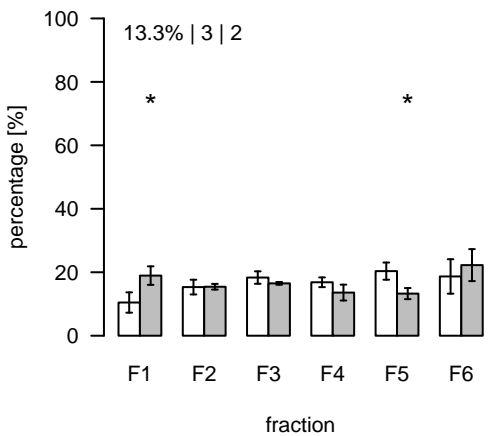

**L2285 (m/z=681.454687; rt=11.32788)**  
T/S Cluster: L-11.3-4

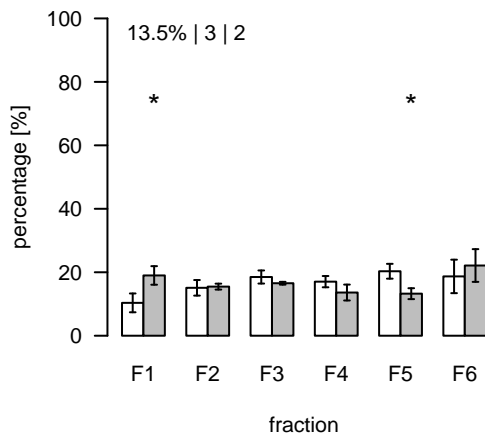

**L2299 (m/z=340.242314; rt=11.328)**  
T/S Cluster: L-11.3-4

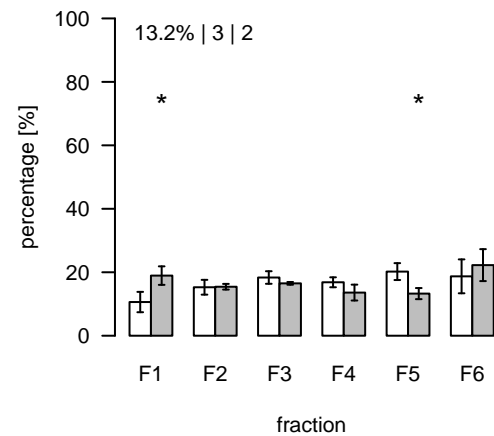

**L2351 (m/z=1342.943031; rt=11.32855)**  
T/S Cluster: L-11.3-4

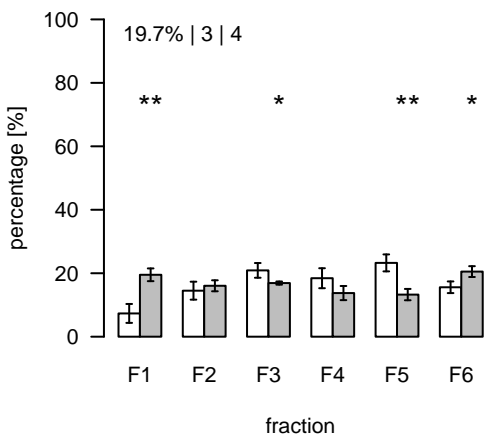

**L2312 (m/z=663.437989; rt=11.32816)**  
T/S Cluster: L-11.3-4

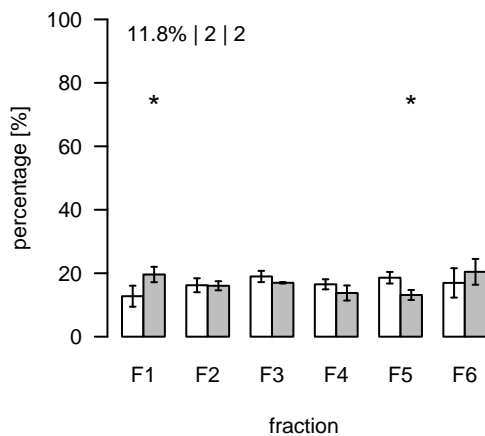

**L2264 (m/z=682.491112; rt=11.32771)**  
T/S Cluster: L-11.3-4

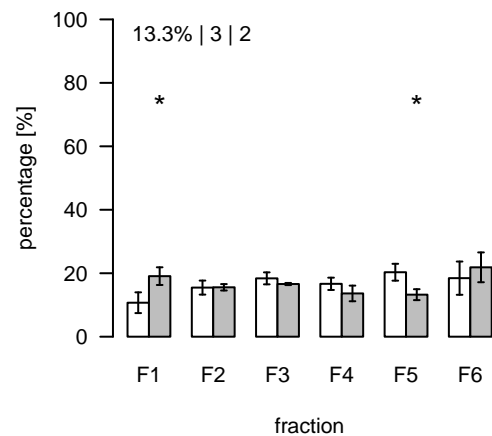

**L2323 (m/z=1343.946169; rt=11.32832)**  
T/S Cluster: L-11.3-4

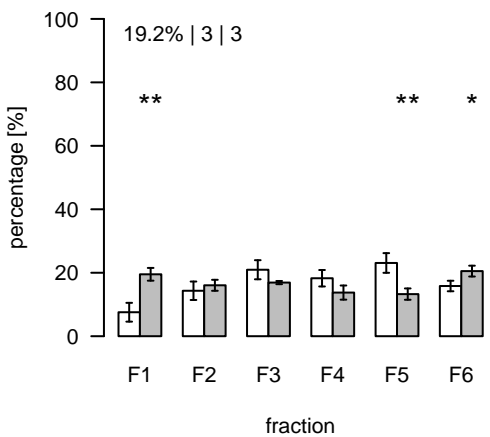

**L2266 (m/z=664.461756; rt=11.32773)**  
T/S Cluster: L-11.3-4

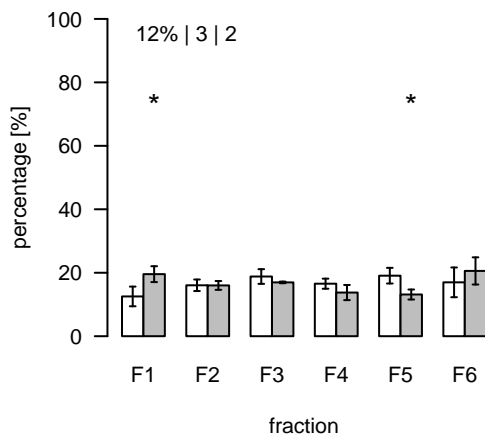

**L2280 (m/z=682.469352; rt=11.32783)**  
T/S Cluster: L-11.3-4

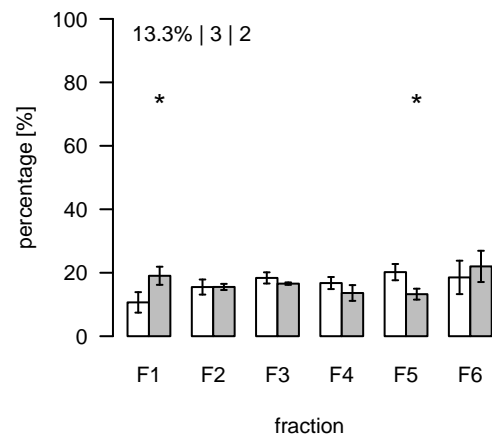

**L2281 (m/z=664.441896; rt=11.32785)**  
T/S Cluster: L-11.3-4

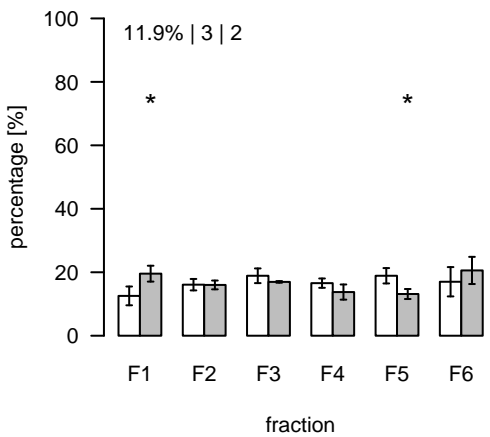

**L2282 (m/z=340.744191; rt=11.32785)**  
T/S Cluster: L-11.3-4

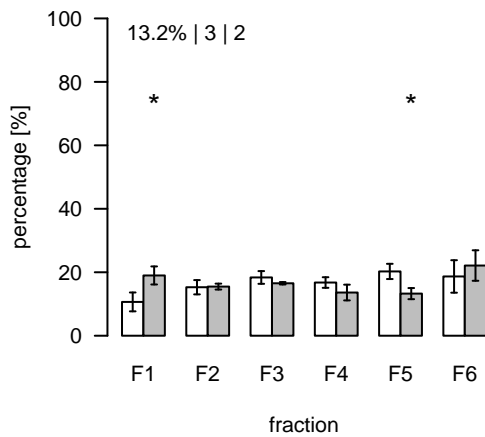

**L2320 (m/z=1344.94999; rt=11.32827)**  
T/S Cluster: L-11.3-4

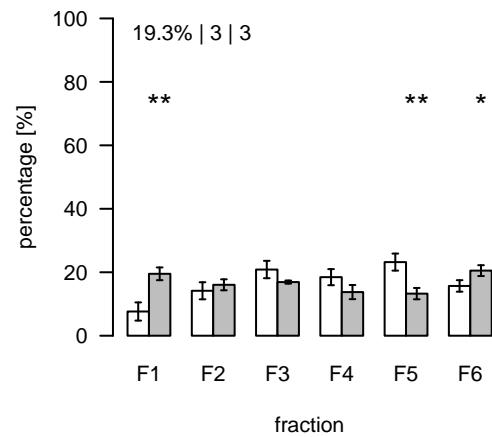

**L2292 (m/z=226.830657; rt=11.32795)**  
T/S Cluster: L-11.3-4

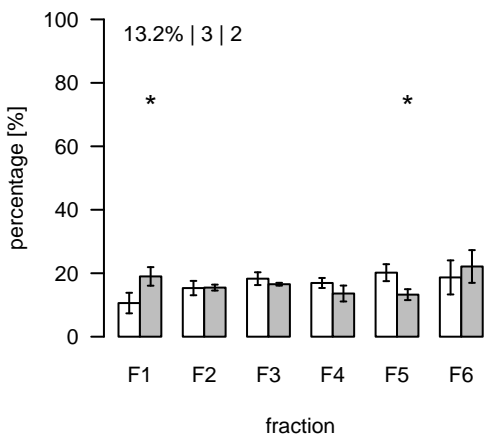

**L2369 (m/z=1342.795221; rt=11.32874)**  
T/S Cluster: L-11.3-4

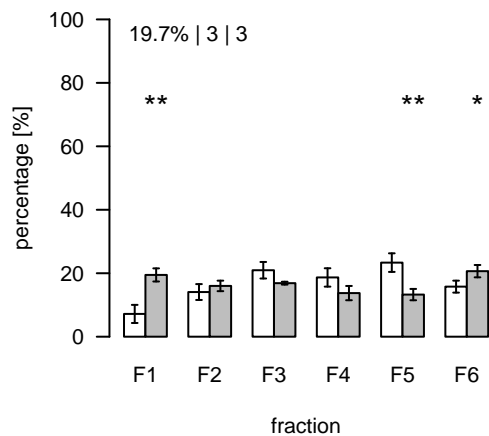

**L2297 (m/z=331.73166; rt=11.32799)**  
T/S Cluster: L-11.3-4

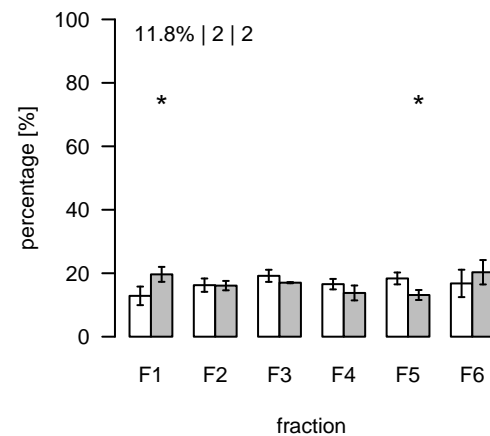

**L2311 (m/z=331.72729; rt=11.32816)**  
T/S Cluster: L-11.3-4

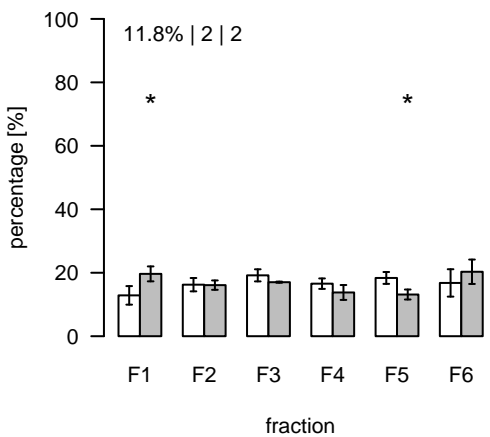

**L2342 (m/z=1343.802009; rt=11.32848)**  
T/S Cluster: L-11.3-4

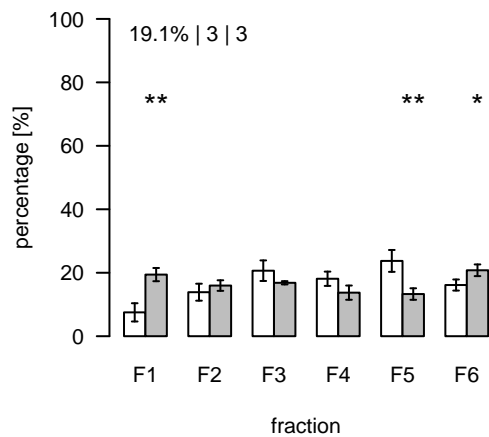

**L2306 (m/z=723.517163; rt=11.32809)**  
T/S Cluster: L-11.3-4

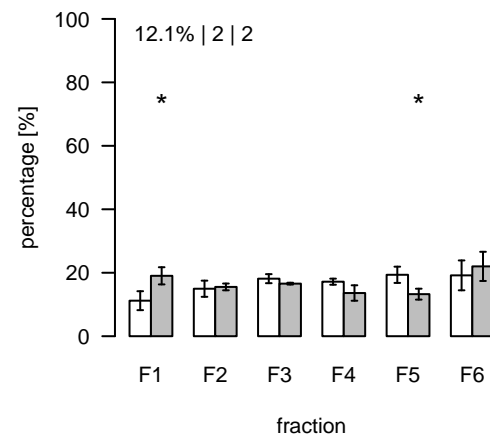

**L2272 (m/z=227.1653; rt=11.32776)**  
T/S Cluster: L-11.3-4

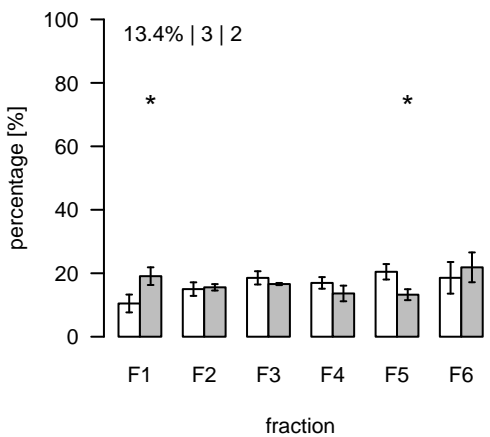

**L2315 (m/z=723.498903; rt=11.3282)**  
T/S Cluster: L-11.3-4

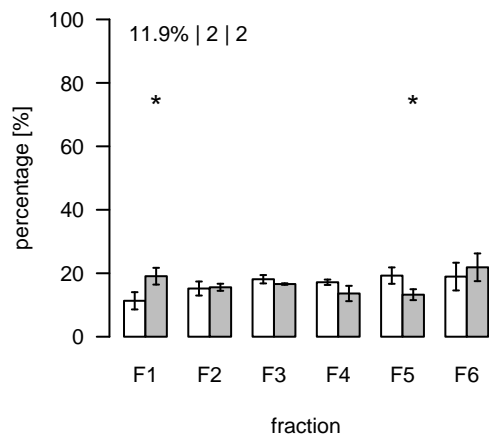

**L2259 (m/z=683.494754; rt=11.32759)**  
T/S Cluster: L-11.3-4

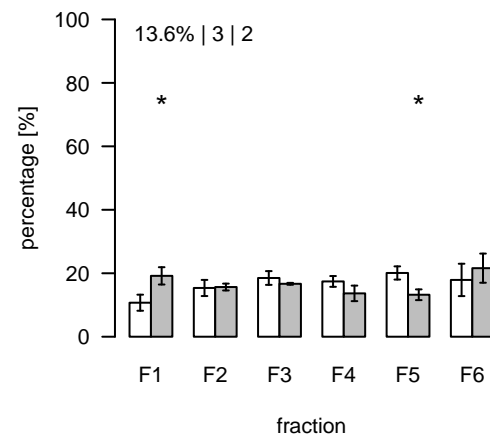

**L2270 (m/z=665.465556; rt=11.32776)**  
T/S Cluster: L-11.3-4

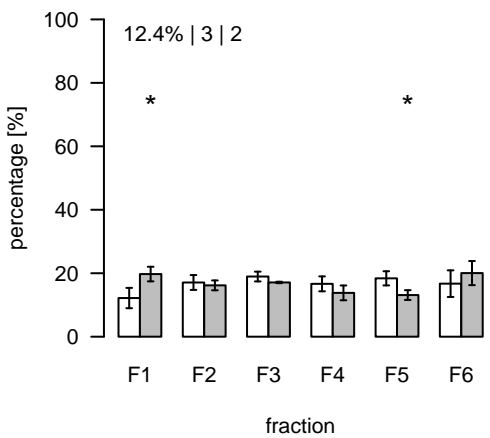

**L2309 (m/z=1345.952447; rt=11.32815)**  
T/S Cluster: L-11.3-4

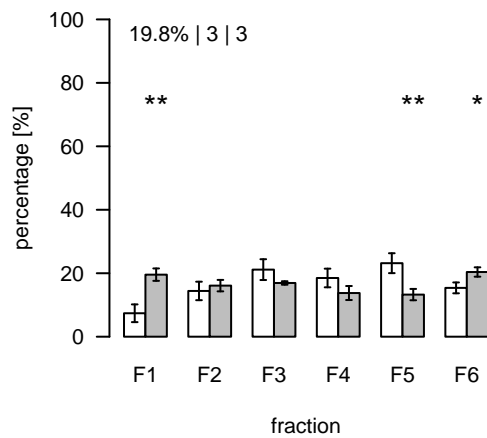

**L2362 (m/z=671.473439; rt=11.32863)**  
T/S Cluster: L-11.3-4

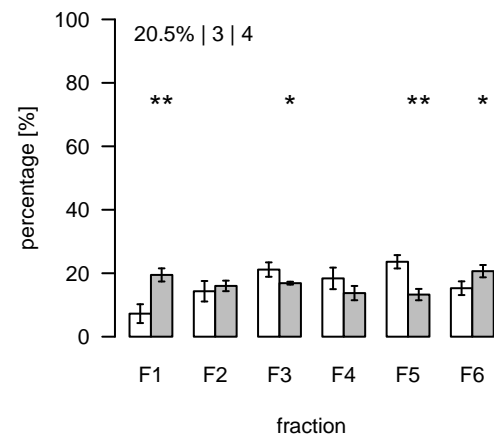

**L2260 (m/z=683.475497; rt=11.32765)**  
T/S Cluster: L-11.3-4

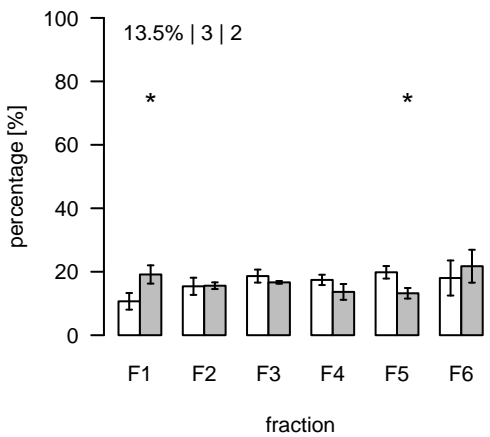

**L2338 (m/z=671.974756; rt=11.32842)**  
T/S Cluster: L-11.3-4

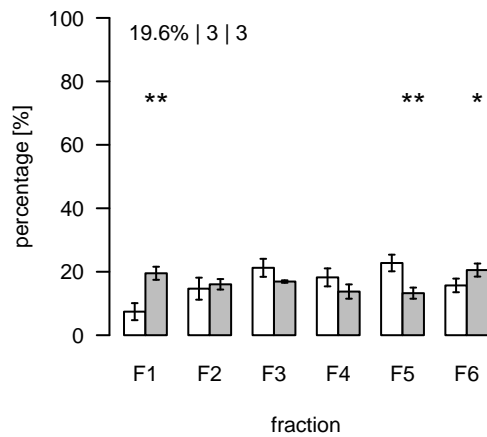

**L2284 (m/z=665.448976; rt=11.32786)**  
T/S Cluster: L-11.3-4

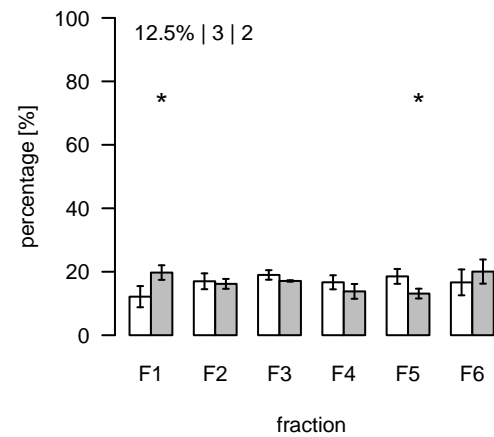

**L2261 (m/z=341.248093; rt=11.32769)**  
T/S Cluster: L-11.3-4

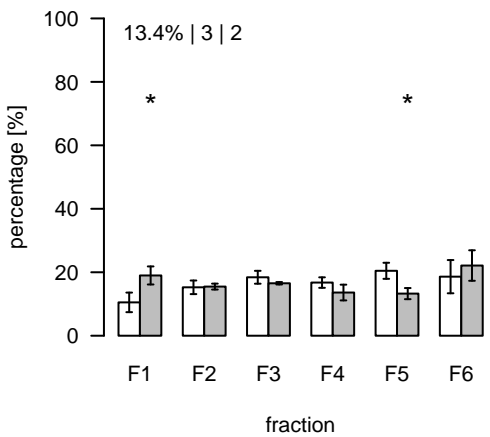

**L2283 (m/z=341.24374; rt=11.32785)**  
T/S Cluster: L-11.3-4

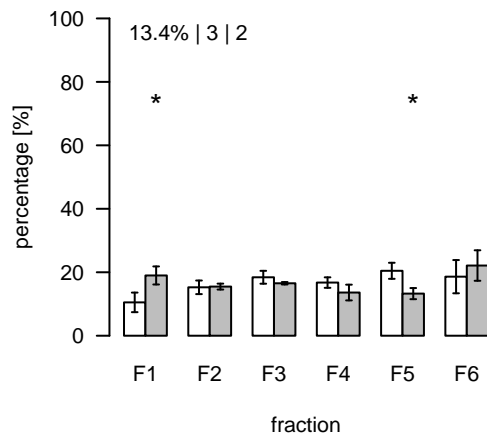

**L2348 (m/z=1357.962213; rt=11.32853)**  
T/S Cluster: L-11.3-4

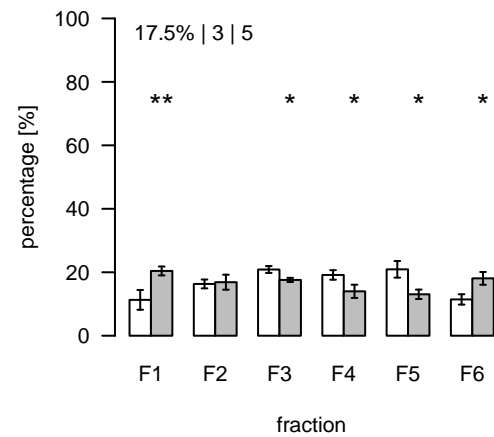

**L2262 (m/z=227.162009; rt=11.32769)**  
T/S Cluster: L-11.3-4

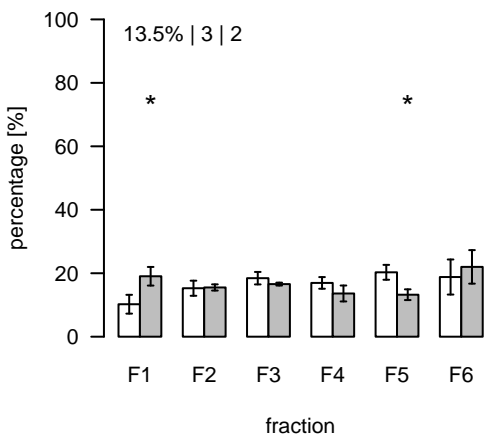

**L2234 (m/z=1343.086879; rt=11.30789)**  
T/S Cluster: L-11.3-4

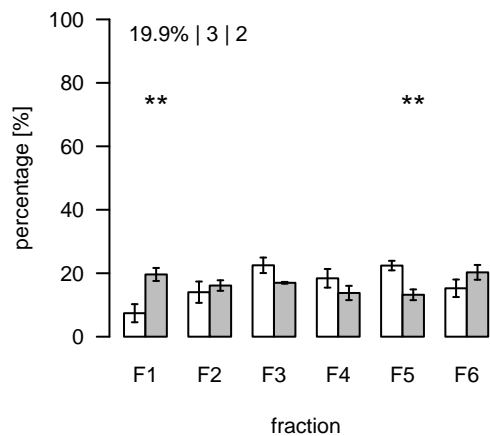

**L2321 (m/z=226.825794; rt=11.32828)**  
T/S Cluster: L-11.3-4

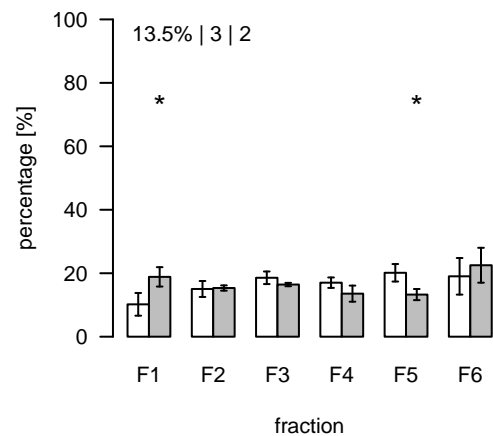

**L2254 (m/z=332.233386; rt=11.32752)**  
T/S Cluster: L-11.3-4

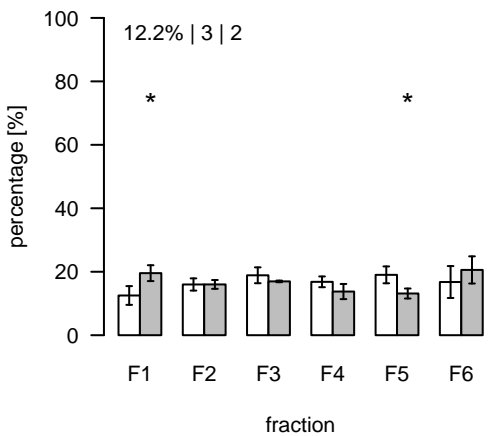

**L2271 (m/z=332.229335; rt=11.32776)**  
T/S Cluster: L-11.3-4

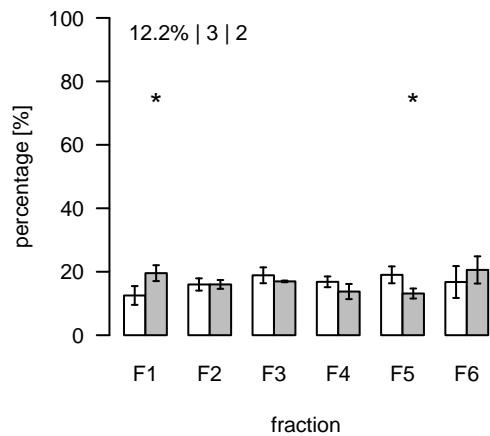

**L2332 (m/z=1412.007156; rt=11.32839)**  
T/S Cluster: L-11.3-4

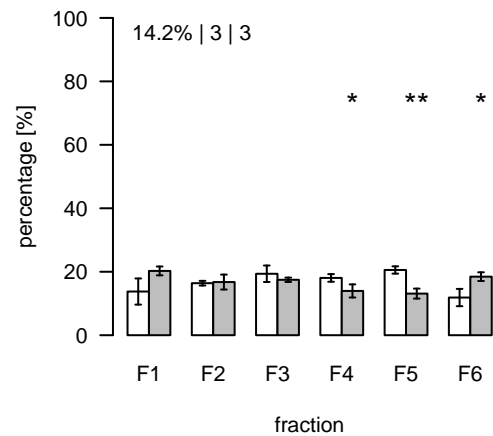

**L2322 (m/z=340.22938; rt=11.32829)**  
T/S Cluster: L-11.3-4

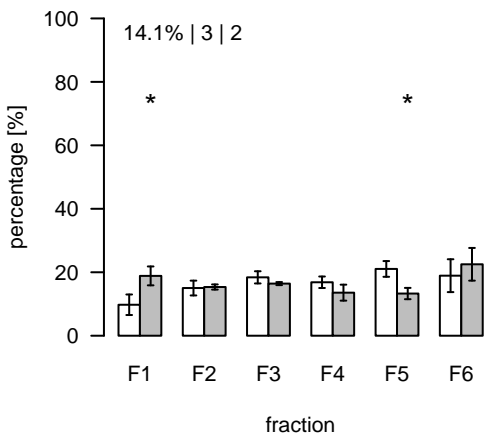

**L2294 (m/z=724.51795; rt=11.32798)**  
T/S Cluster: L-11.3-4

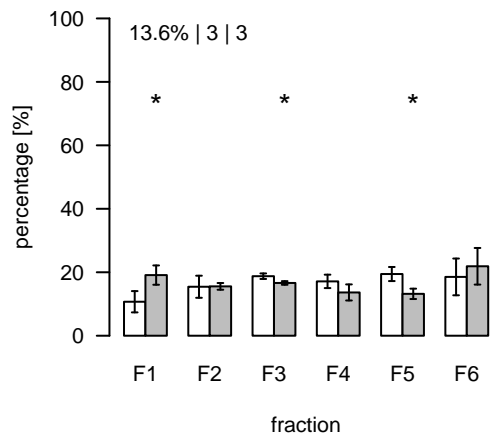

**L2248 (m/z=607.394169; rt=11.32731)**  
T/S Cluster: L-11.3-4

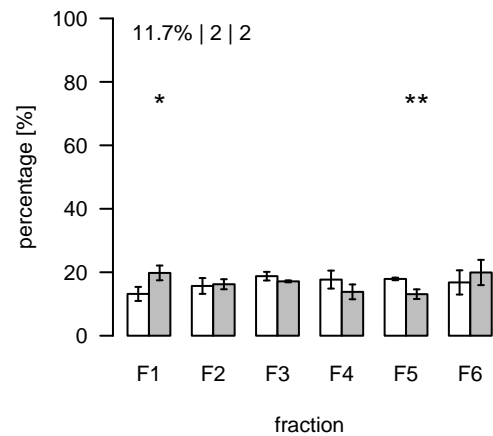

**L2287 (m/z=1411.003668; rt=11.3279)**  
T/S Cluster: L-11.3-4

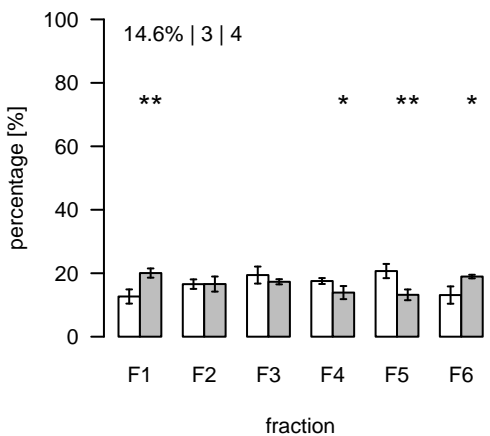

**L2314 (m/z=221.155346; rt=11.32819)**  
T/S Cluster: L-11.3-4

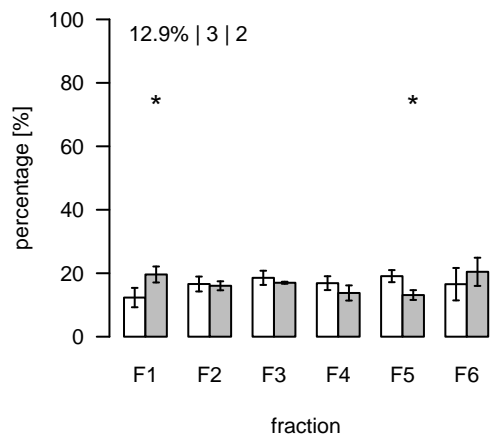

**L2293 (m/z=1400.007172; rt=11.32798)**  
T/S Cluster: L-11.3-4

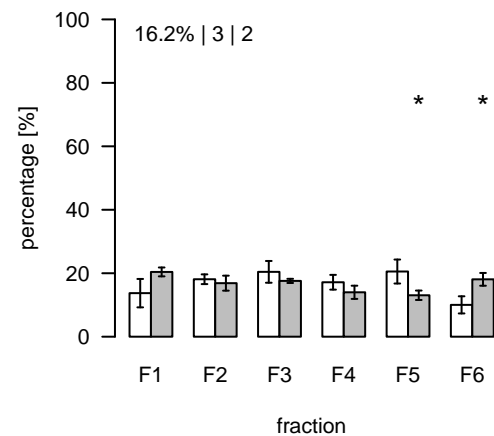

**L2265 (m/z=1399.00331; rt=11.32772)**  
T/S Cluster: L-11.3-4

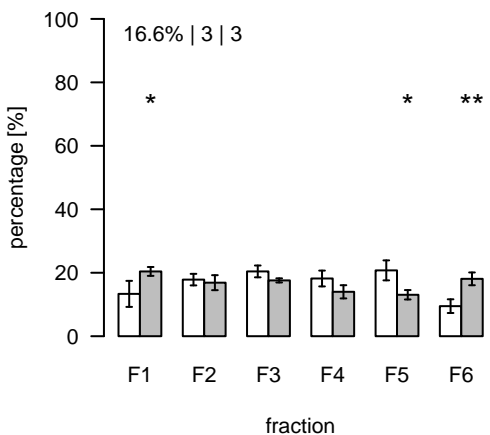

**L2319 (m/z=672.476714; rt=11.32826)**  
T/S Cluster: L-11.3-4

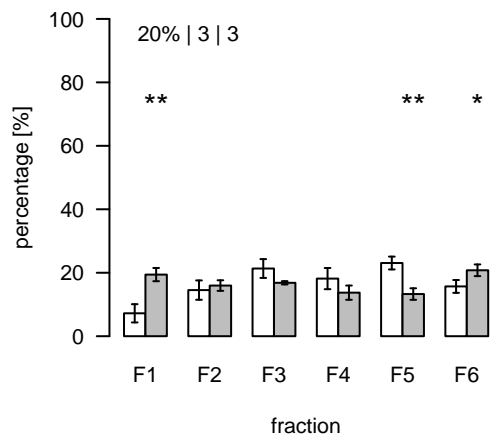

**L2345 (m/z=221.153493; rt=11.32852)**  
T/S Cluster: L-11.3-4

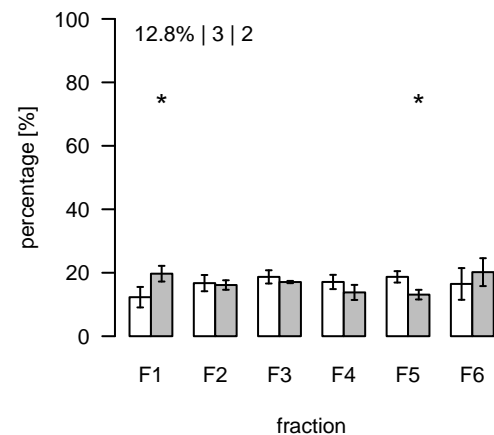

**L2304 (m/z=340.732909; rt=11.32806)**  
T/S Cluster: L-11.3-4

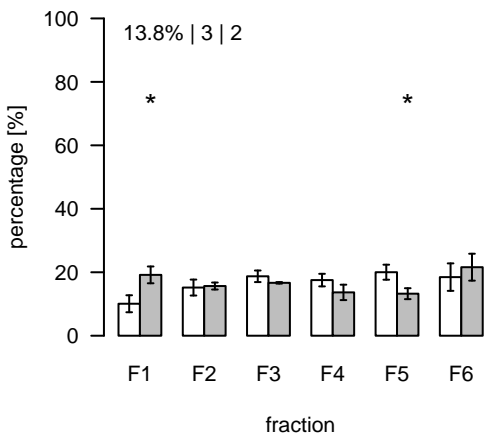

**L2295 (m/z=170.120991; rt=11.32798)**  
T/S Cluster: L-11.3-4

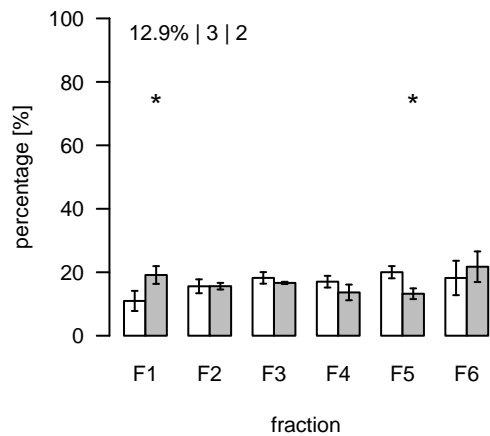

**L2245 (m/z=227.499745; rt=11.32719)**  
T/S Cluster: L-11.3-4

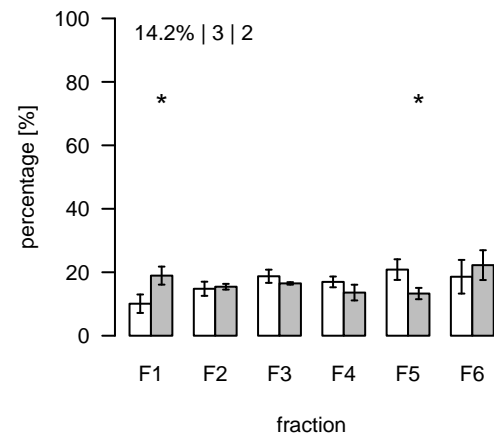

**L2328 (m/z=447.658287; rt=11.32837)**  
T/S Cluster: L-11.3-4

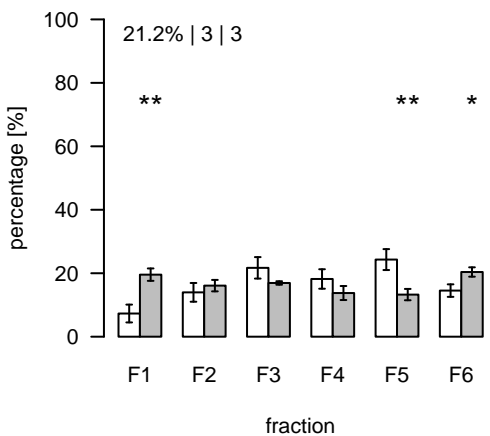

**L2331 (m/z=447.992633; rt=11.32839)**  
T/S Cluster: L-11.3-4

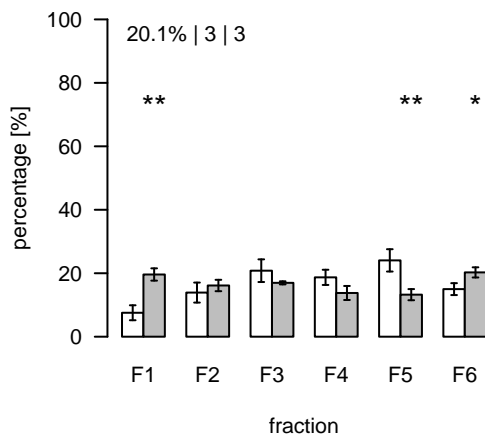

**L2307 (m/z=170.123387; rt=11.3281)**  
T/S Cluster: L-11.3-4

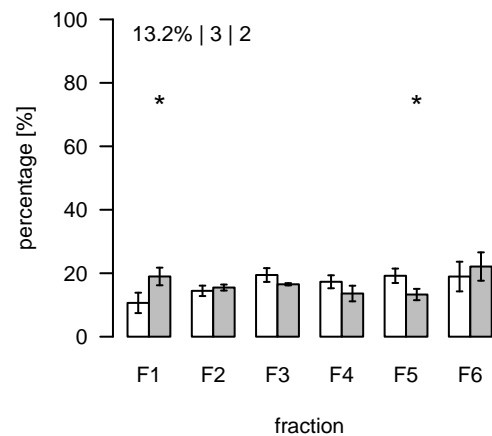

**L2316 (m/z=671.939815; rt=11.32822)**  
T/S Cluster: L-11.3-4

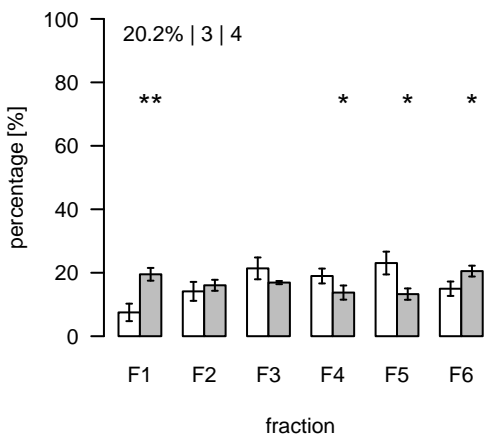

**L2273 (m/z=136.09795; rt=11.32776)**  
T/S Cluster: L-11.3-4

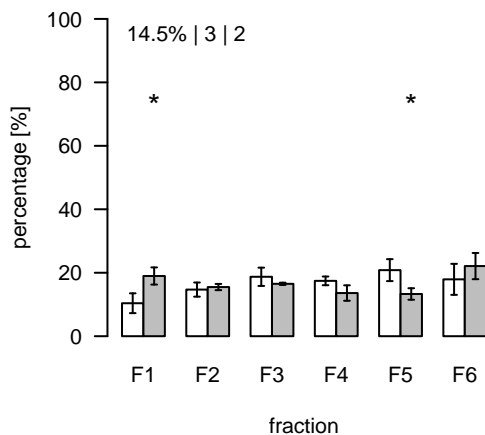

**L2233 (m/z=136.097941; rt=11.30728)**  
T/S Cluster: L-11.3-4

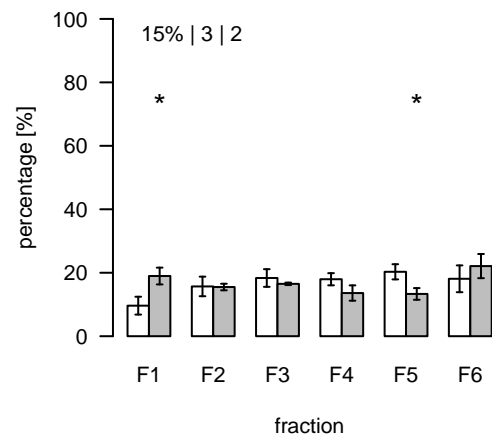

**L2263 (m/z=136.097301; rt=11.32771)**  
T/S Cluster: L-11.3-4

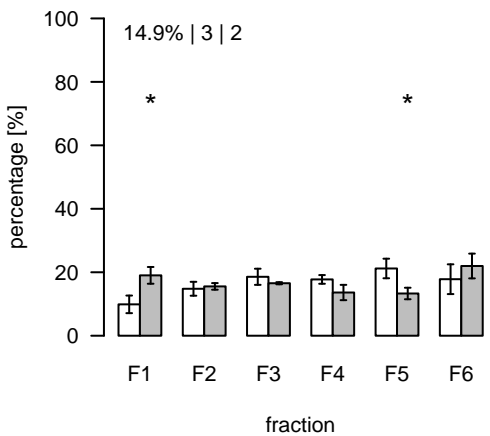

**L2318 (m/z=1346.955595; rt=11.32823)**  
T/S Cluster: L-11.3-4

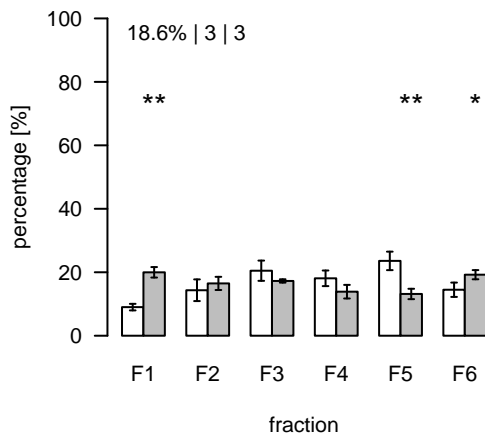

**L2364 (m/z=671.437011; rt=11.32865)**  
T/S Cluster: L-11.3-4

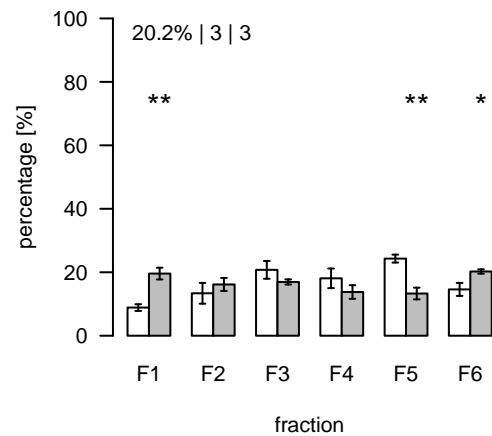

**L2268 (m/z=1401.008383; rt=11.32774)**  
T/S Cluster: L-11.3-4

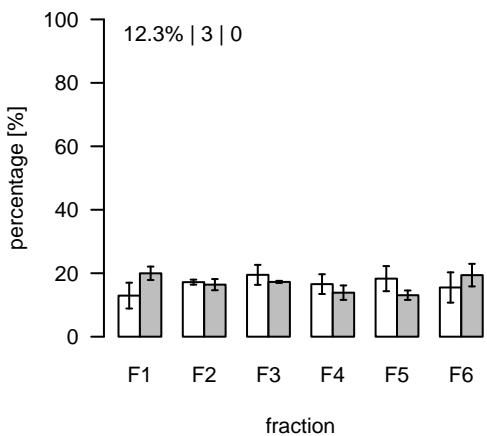

**L2242 (m/z=666.46708; rt=11.32569)**  
T/S Cluster: L-11.3-4

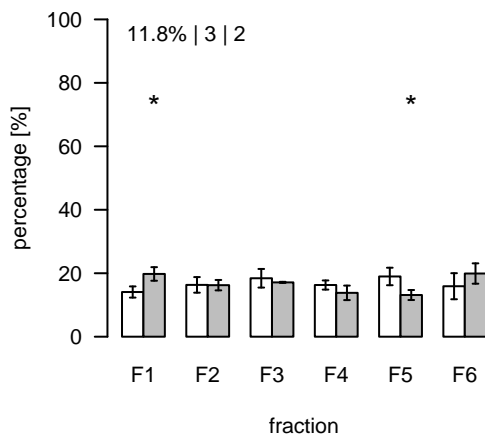

**L2249 (m/z=221.489556; rt=11.32731)**  
T/S Cluster: L-11.3-4

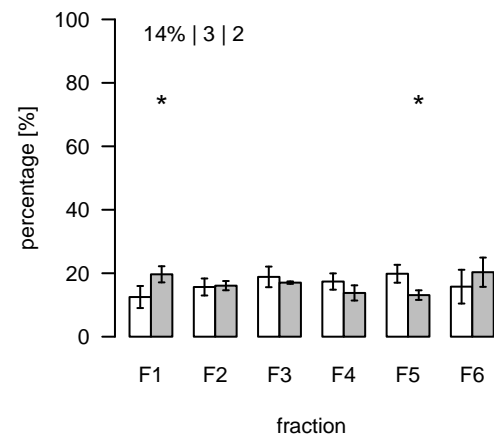

**L2243 (m/z=170.37195; rt=11.32661)**  
T/S Cluster: L-11.3-4

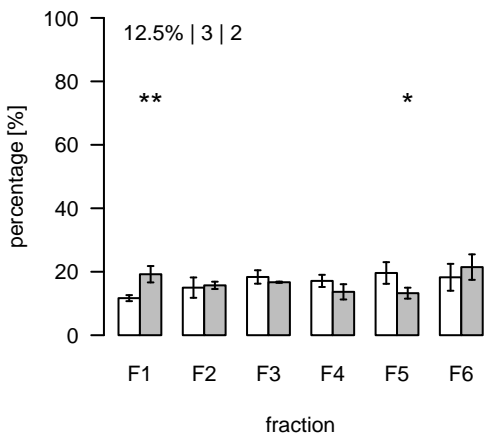

**L2247 (m/z=170.373972; rt=11.32725)**  
T/S Cluster: L-11.3-4

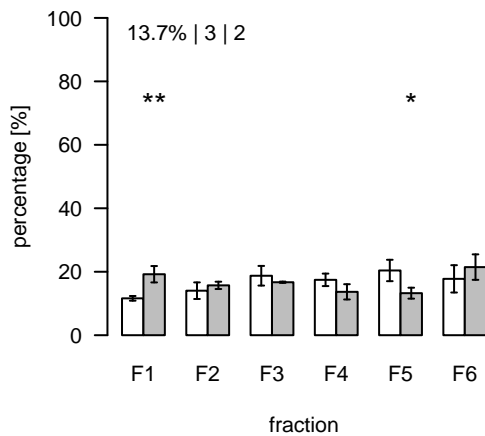

**L2235 (m/z=1344.139125; rt=11.30904)**  
T/S Cluster: L-11.3-5

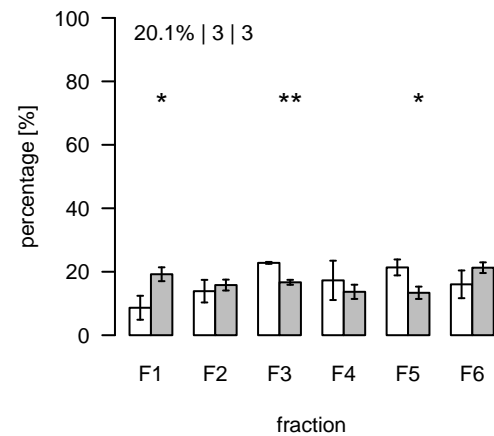

**L2236 (m/z=680.621864; rt=11.317)**  
T/S Cluster: L-11.3-6

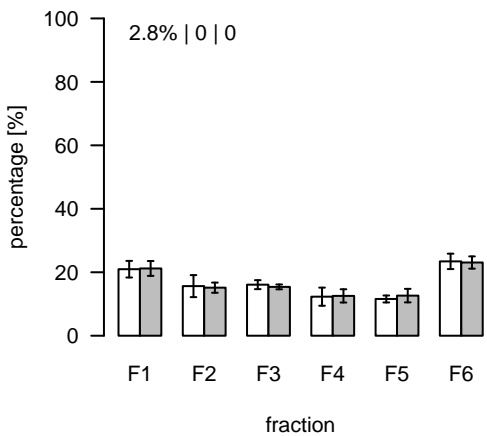

**L2237 (m/z=681.625381; rt=11.31723)**  
T/S Cluster: L-11.3-6

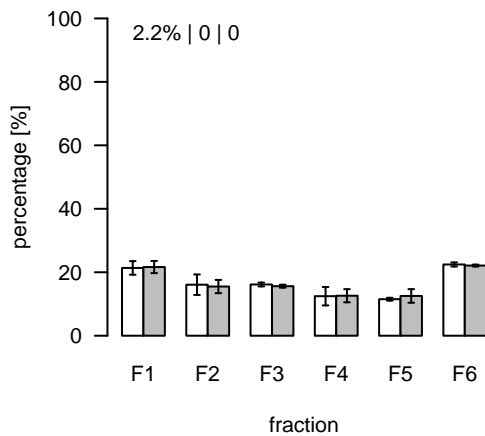

**L2238 (m/z=231.116613; rt=11.32021)**  
T/S Cluster: L-11.3-7

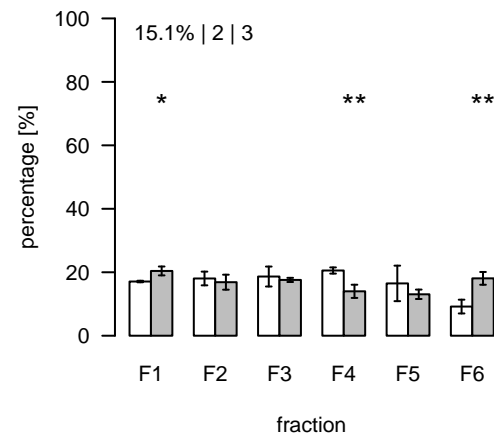



**L2239 (m/z=347.250391; rt=11.32183)**  
T/S Cluster: L-11.3-8

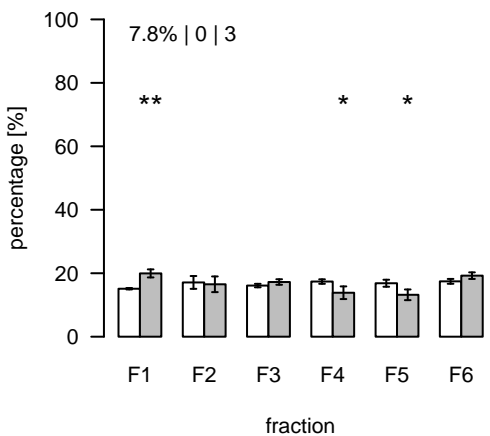

**L2240 (m/z=610.187215; rt=11.32321)**  
T/S Cluster: L-11.3-9

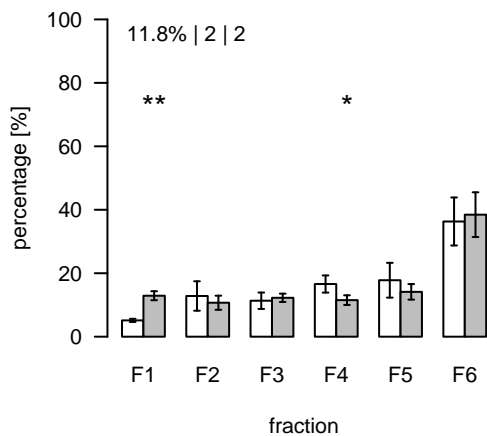

**L2241 (m/z=391.28595; rt=11.32357)**  
T/S Cluster: L-11.3-10

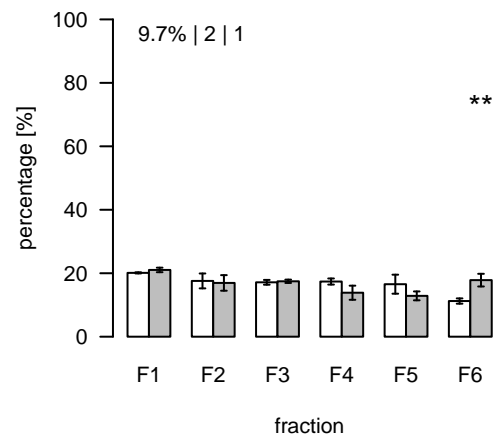

**L2276 (m/z=708.515115; rt=11.32777)**  
T/S Cluster: L-11.3-11

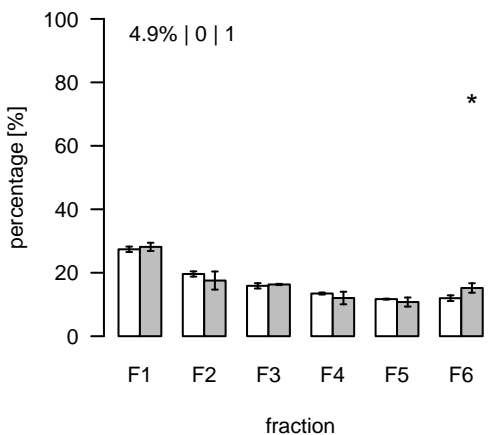

**L2256 (m/z=709.519495; rt=11.32756)**  
T/S Cluster: L-11.3-11

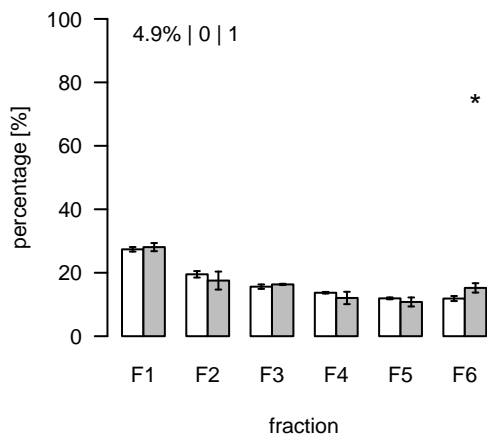

**L2288 (m/z=708.486454; rt=11.32793)**  
T/S Cluster: L-11.3-11

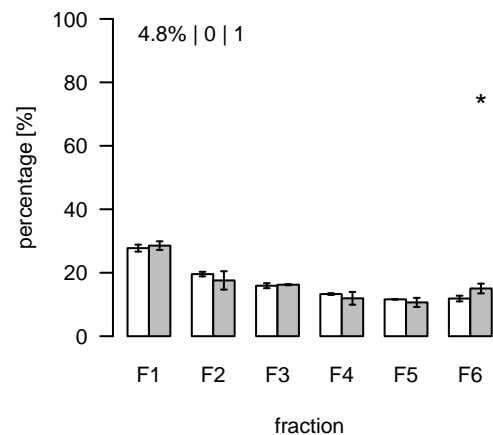

**L2267 (m/z=709.49715; rt=11.32774)**  
T/S Cluster: L-11.3-11

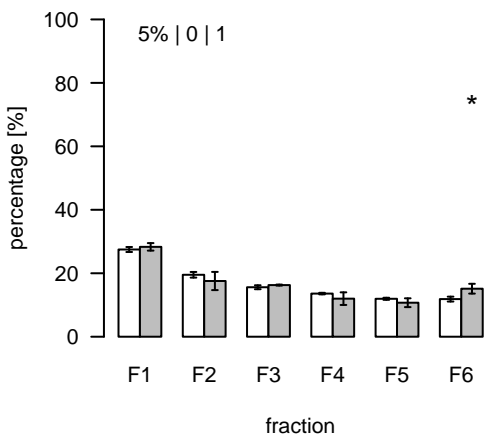

**L2250 (m/z=710.522653; rt=11.32734)**  
T/S Cluster: L-11.3-11

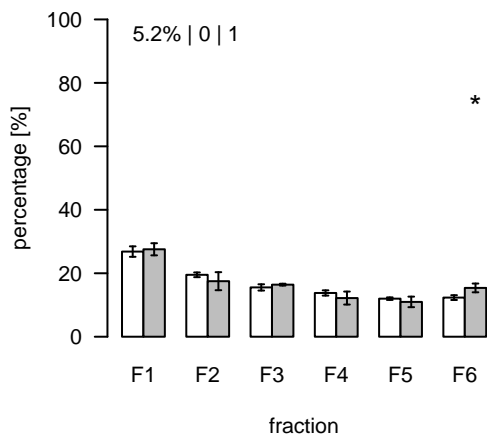

**L2251 (m/z=710.508794; rt=11.32746)**  
T/S Cluster: L-11.3-11

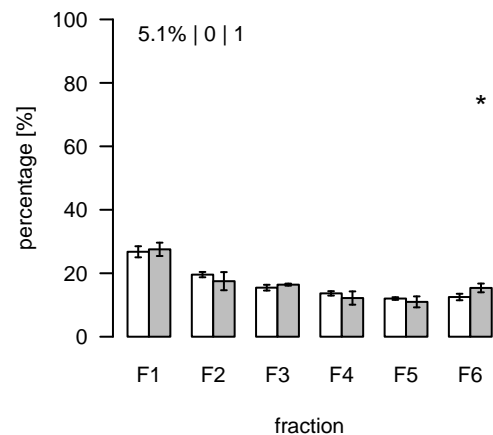

**L2275 (m/z=354.260674; rt=11.32776)**  
T/S Cluster: L-11.3-11

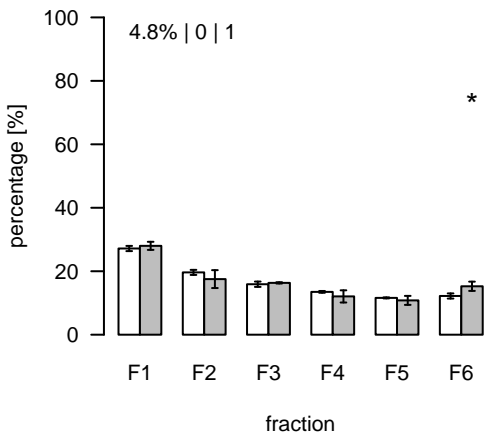

**L2290 (m/z=354.255784; rt=11.32794)**  
T/S Cluster: L-11.3-11

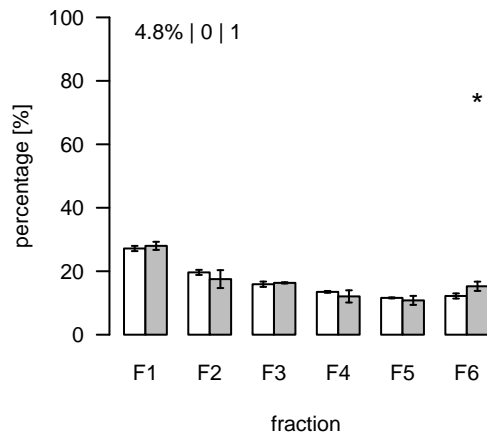

**L2255 (m/z=354.762739; rt=11.32755)**  
T/S Cluster: L-11.3-11

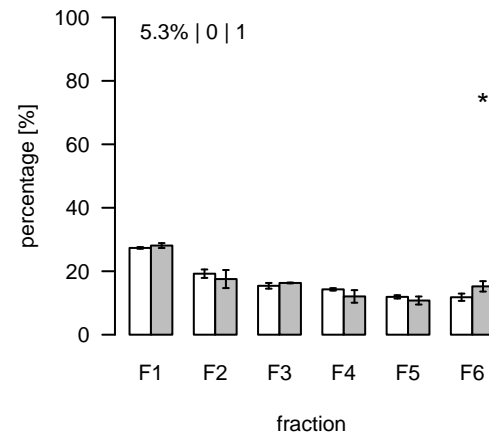

**L2286 (m/z=354.757729; rt=11.32788)**  
T/S Cluster: L-11.3-11

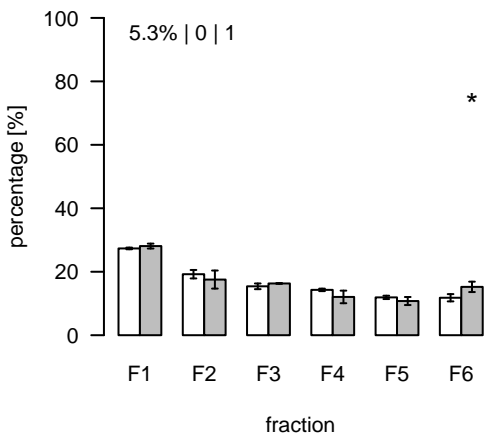

**L2278 (m/z=236.17483; rt=11.32781)**  
T/S Cluster: L-11.3-11

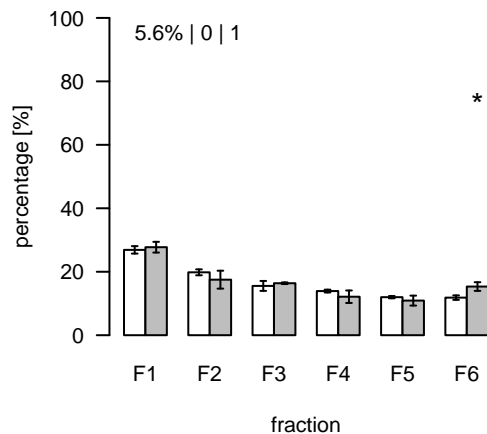

**L2310 (m/z=236.171988; rt=11.32815)**  
T/S Cluster: L-11.3-11

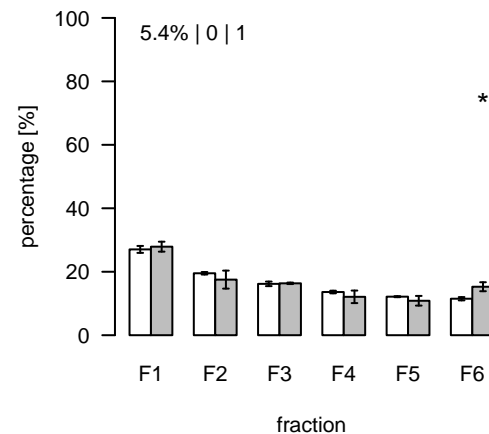

**L2258 (m/z=236.50934; rt=11.32756)**  
T/S Cluster: L-11.3-11

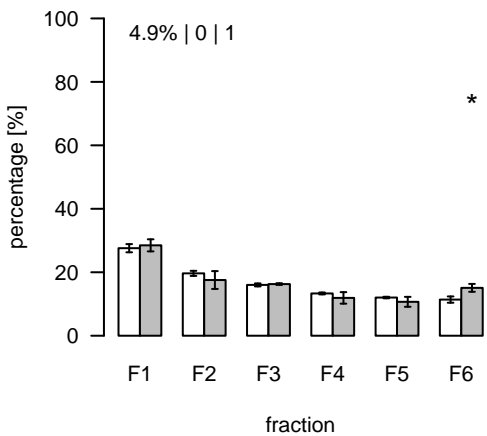

**L2246 (m/z=711.524857; rt=11.32724)**  
T/S Cluster: L-11.3-11

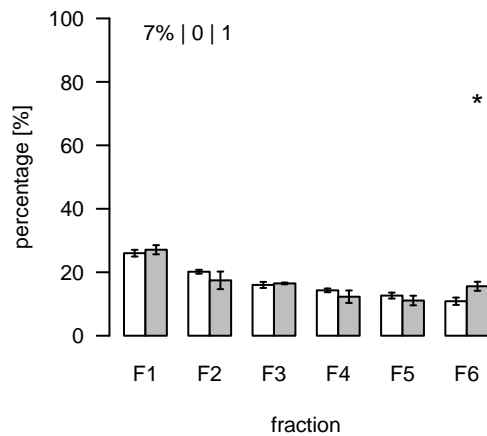

**L2244 (m/z=355.261902; rt=11.32663)**  
T/S Cluster: L-11.3-11

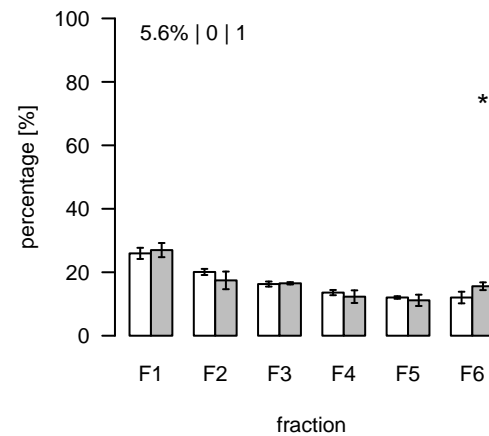

**L2252 (m/z=737.549495; rt=11.32747)**  
T/S Cluster: L-11.3-12

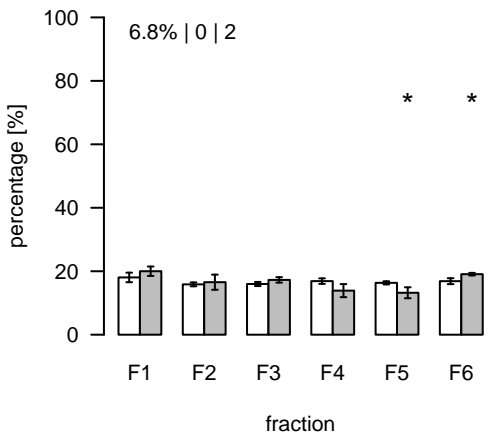

**L2257 (m/z=751.528498; rt=11.32756)**  
T/S Cluster: L-11.3-13

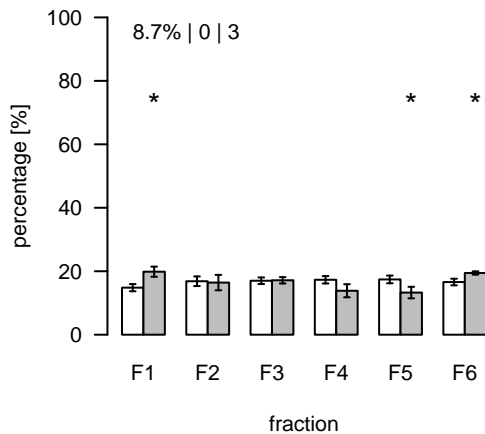

**L2300 (m/z=694.489188; rt=11.328)**  
T/S Cluster: L-11.3-14

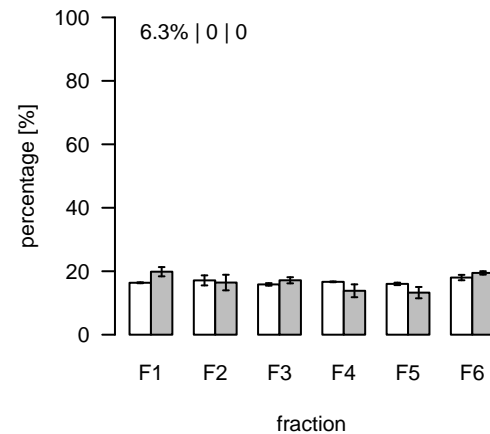

**L2269 (m/z=694.504541; rt=11.32775)**  
T/S Cluster: L-11.3-14

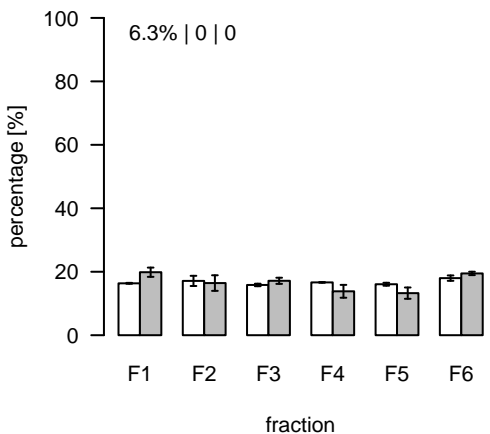

**L2375 (m/z=685.439087; rt=11.32886)**  
T/S Cluster: L-11.3-15

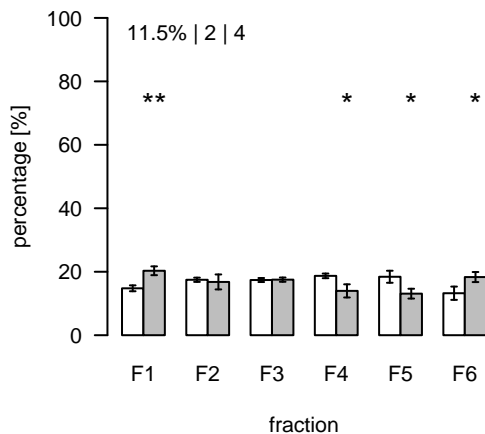

**L2334 (m/z=686.444243; rt=11.3284)**  
T/S Cluster: L-11.3-15

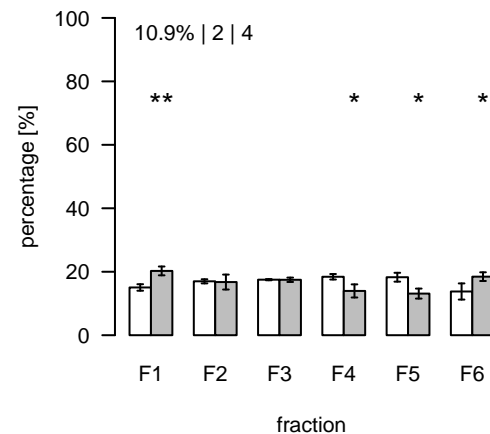

**L2329 (m/z=342.723373; rt=11.32838)**  
T/S Cluster: L-11.3-15

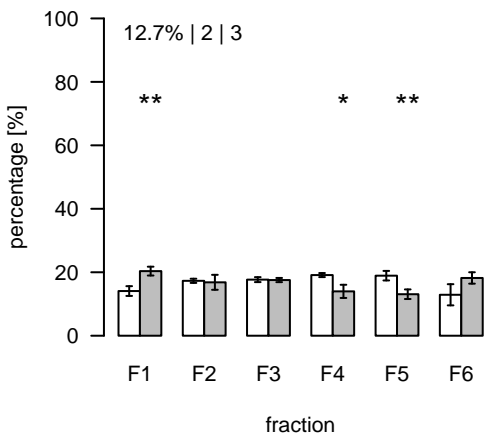

**L2371 (m/z=342.719049; rt=11.32878)**  
T/S Cluster: L-11.3-15

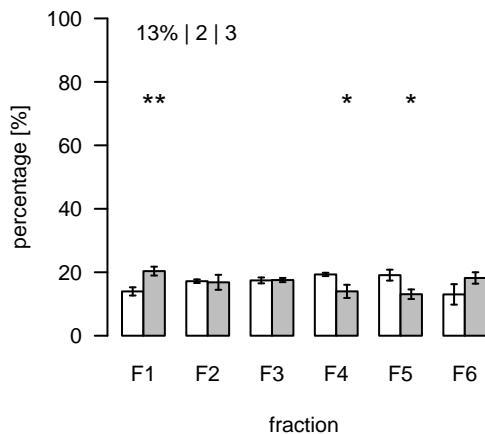

**L2305 (m/z=687.446791; rt=11.32809)**  
T/S Cluster: L-11.3-15

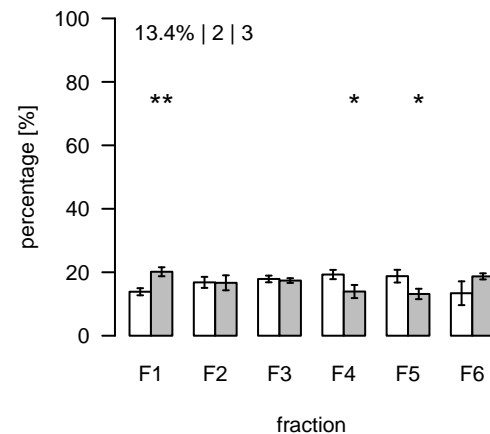

**L2279 (m/z=343.222117; rt=11.32782)**  
T/S Cluster: L-11.3-15

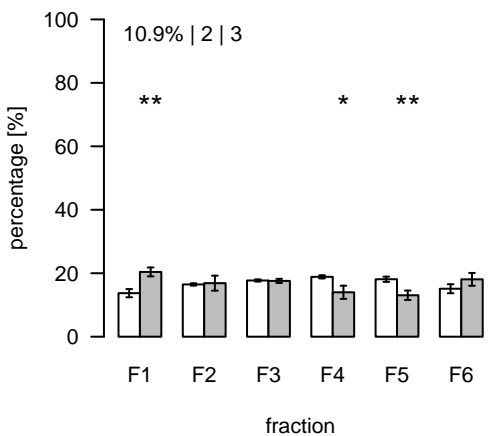

**L2289 (m/z=695.502679; rt=11.32793)**  
T/S Cluster: L-11.3-16

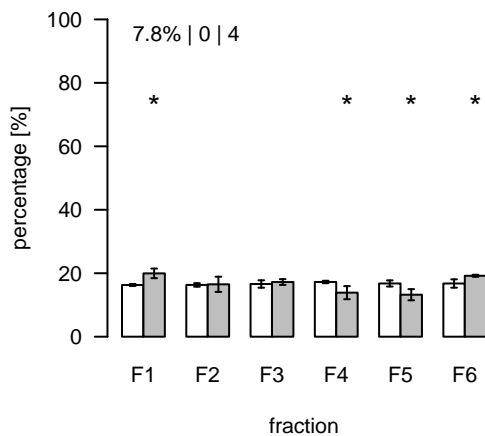

**L2327 (m/z=1371.976616; rt=11.32836)**  
T/S Cluster: L-11.3-17

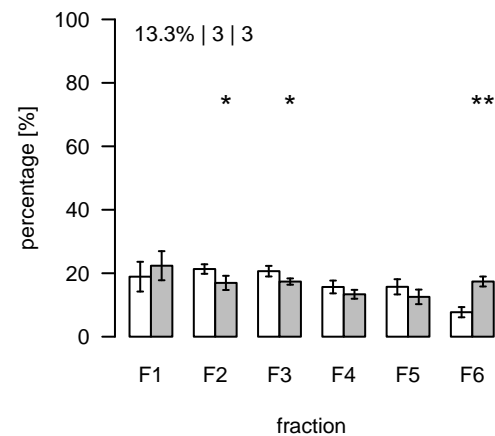

**L2353 (m/z=1370.973116; rt=11.32855)**  
T/S Cluster: L-11.3-17

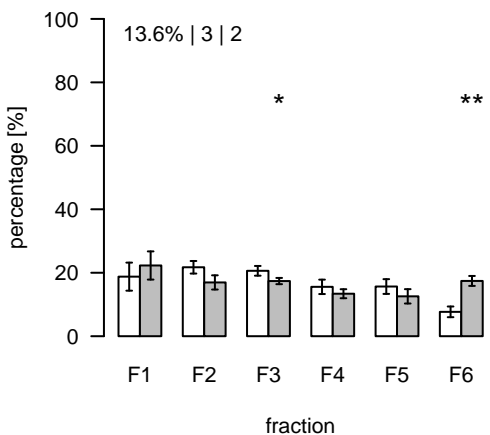

**L2330 (m/z=1372.985458; rt=11.32838)**  
T/S Cluster: L-11.3-17

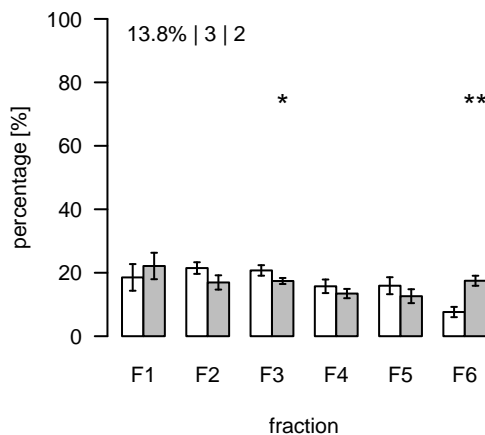

**L2357 (m/z=1370.86255; rt=11.32857)**  
T/S Cluster: L-11.3-17

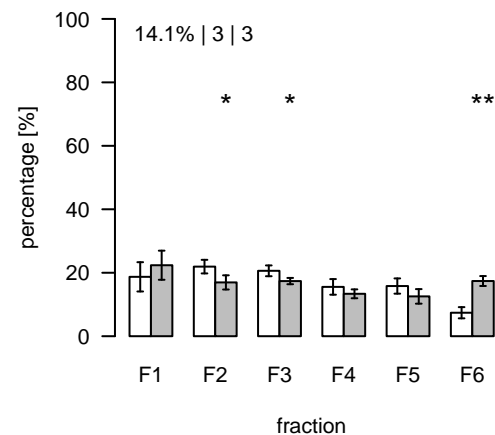

**L2333 (m/z=1371.865205; rt=11.32839)**  
T/S Cluster: L-11.3-17

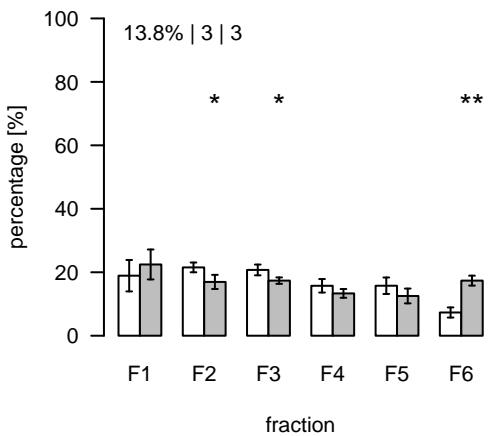

**L2337 (m/z=1372.9127; rt=11.32841)**  
T/S Cluster: L-11.3-17

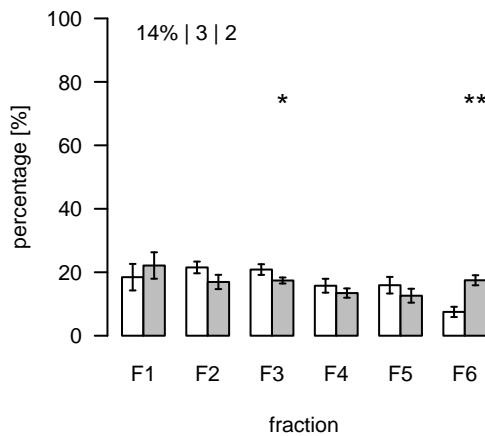

**L2302 (m/z=1373.989103; rt=11.32804)**  
T/S Cluster: L-11.3-17

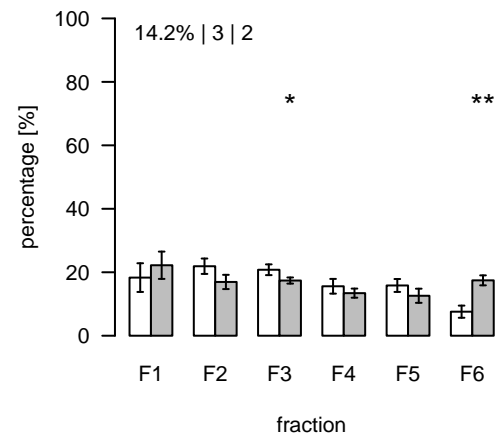

**L2370 (m/z=685.492019; rt=11.32877)**  
T/S Cluster: L-11.3-17

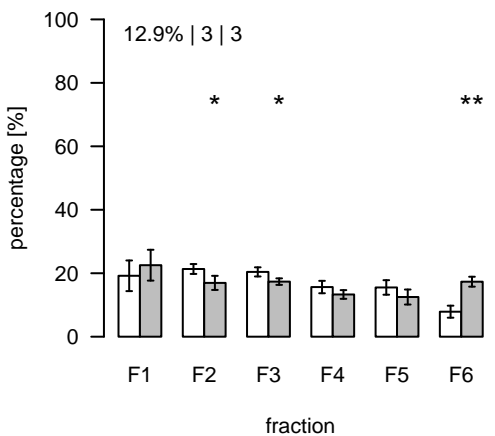

**L2298 (m/z=1373.920207; rt=11.328)**  
T/S Cluster: L-11.3-17

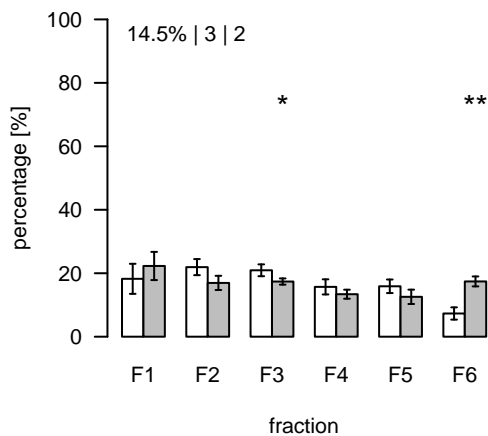

**L2352 (m/z=685.998371; rt=11.32855)**  
T/S Cluster: L-11.3-17

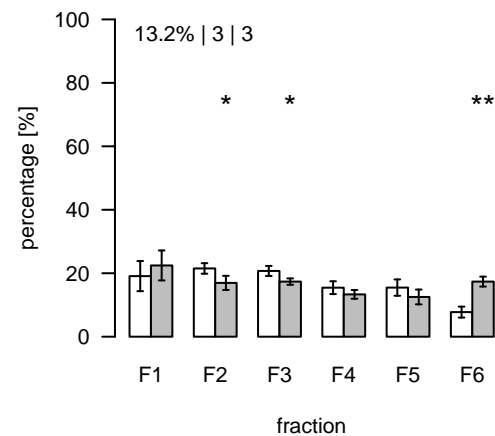

**L2359 (m/z=685.986278; rt=11.32859)**  
T/S Cluster: L-11.3-17

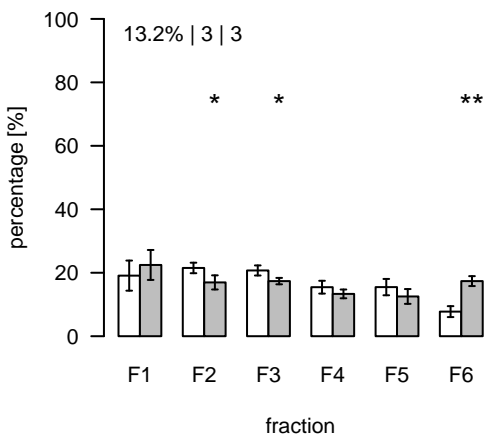

**L2367 (m/z=686.491277; rt=11.32869)**  
T/S Cluster: L-11.3-17

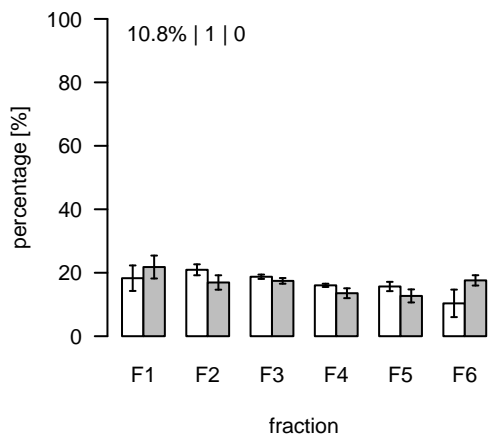

**L2301 (m/z=750.524124; rt=11.32803)**  
T/S Cluster: L-11.3-18

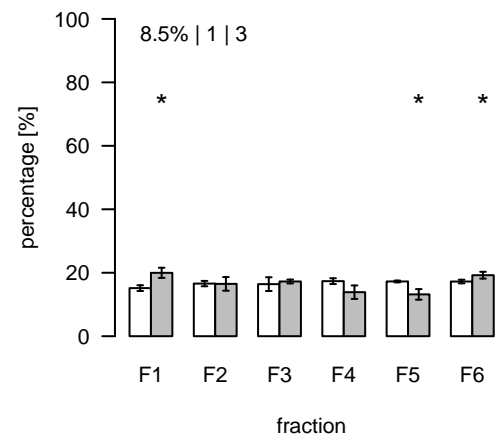

**L2346 (m/z=721.49864; rt=11.32853)**  
T/S Cluster: L-11.3-19

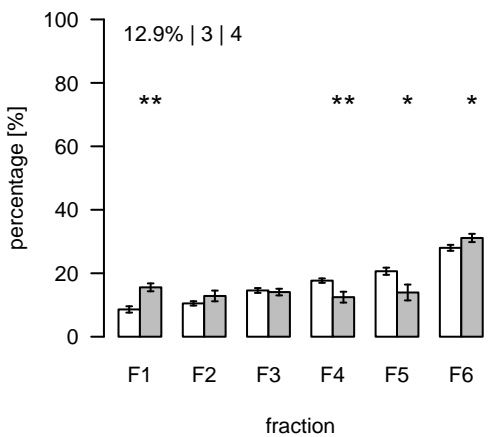

**L2335 (m/z=721.512105; rt=11.3284)**  
T/S Cluster: L-11.3-19

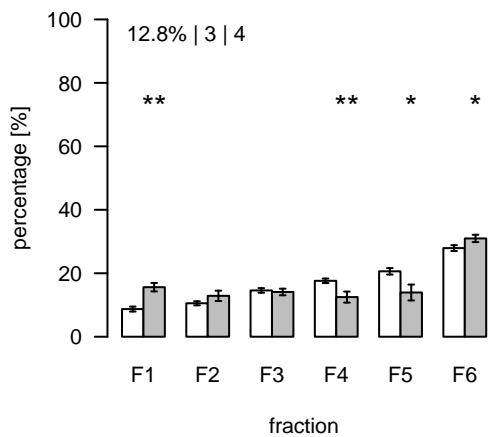

**L2317 (m/z=722.514378; rt=11.32823)**  
T/S Cluster: L-11.3-19

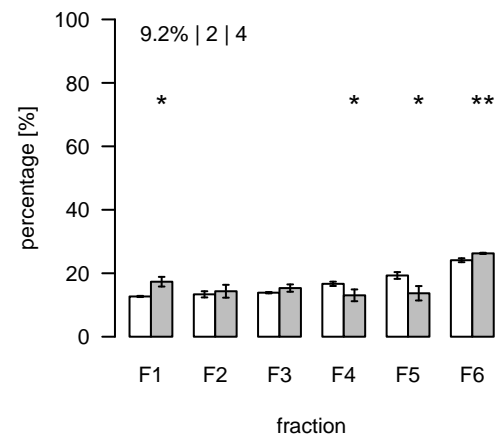

**L2349 (m/z=722.49714; rt=11.32854)**  
T/S Cluster: L-11.3-19

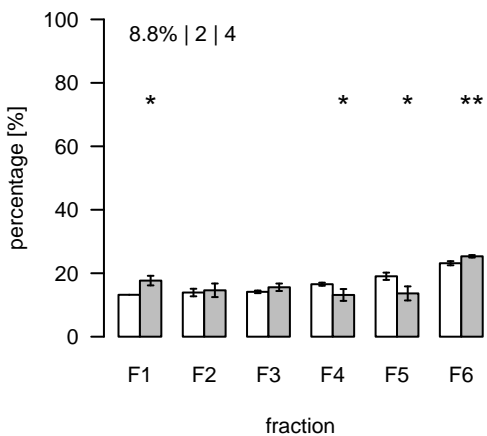

**L2324 (m/z=793.613488; rt=11.32832)**  
T/S Cluster: L-11.3-20

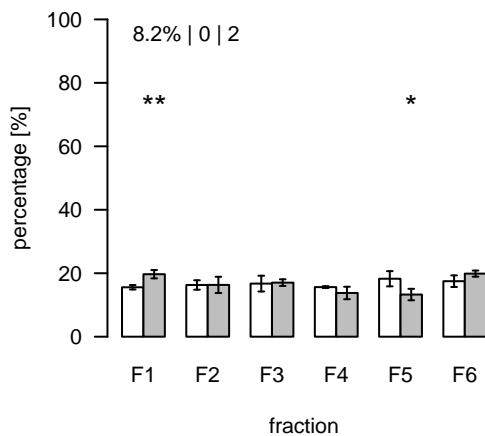

**L2325 (m/z=749.55037; rt=11.32834)**  
T/S Cluster: L-11.3-21

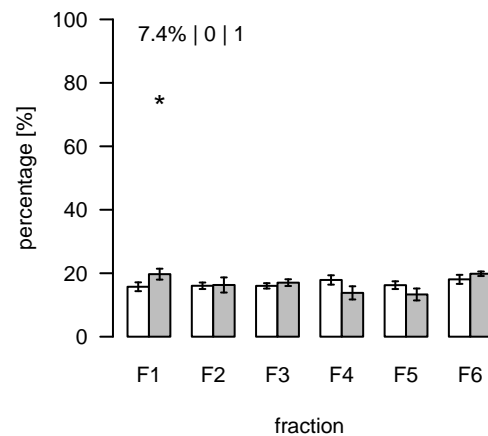

**L2326 (m/z=736.552859; rt=11.32834)**  
T/S Cluster: L-11.3-22

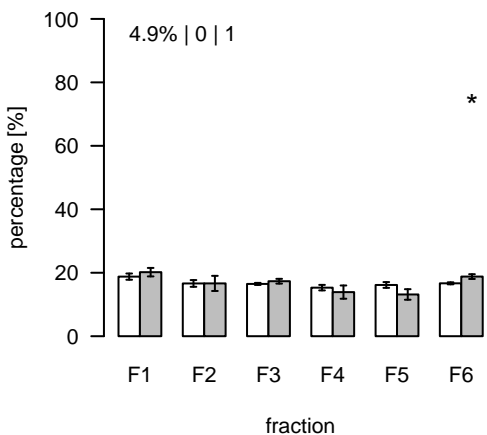

**L2336 (m/z=736.534486; rt=11.3284)**  
T/S Cluster: L-11.3-22

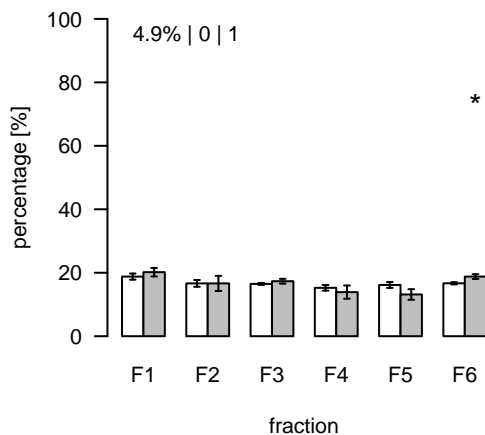

**L2358 (m/z=1384.986335; rt=11.32858)**  
T/S Cluster: L-11.3-23

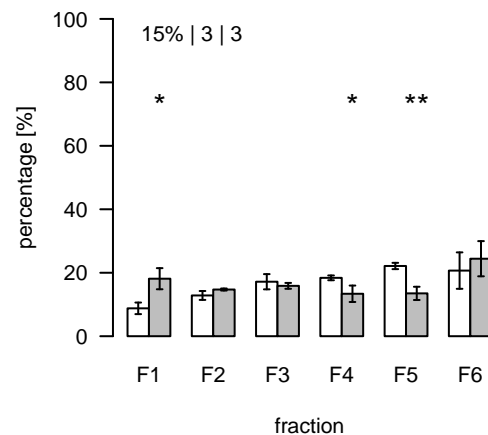

**L2365 (m/z=1384.927902; rt=11.32866)**  
T/S Cluster: L-11.3-23

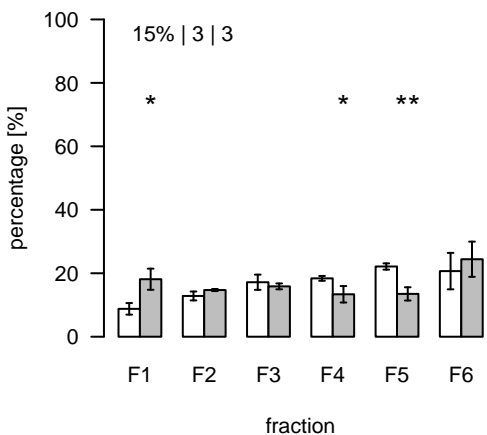

**L2340 (m/z=1385.97132; rt=11.32846)**  
T/S Cluster: L-11.3-23

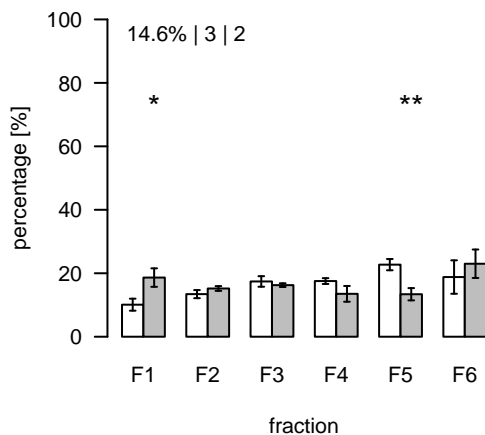

**L2377 (m/z=1383.967307; rt=11.32901)**  
T/S Cluster: L-11.3-23

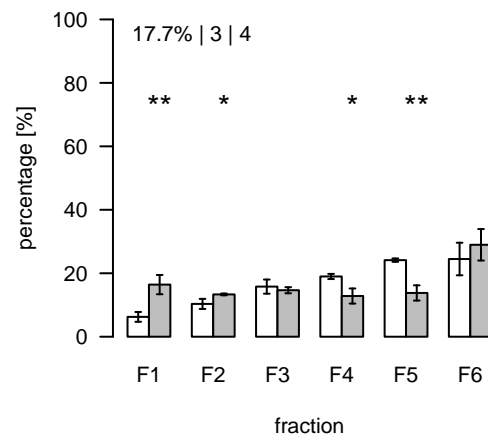

**L2368 (m/z=1386.973574; rt=11.32872)**  
T/S Cluster: L-11.3-23

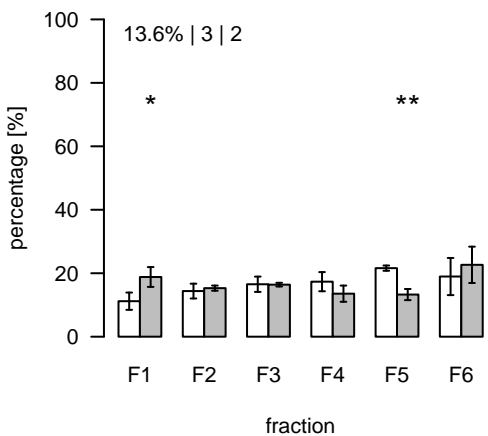

**L2341 (m/z=727.469583; rt=11.32848)**  
T/S Cluster: L-11.3-24

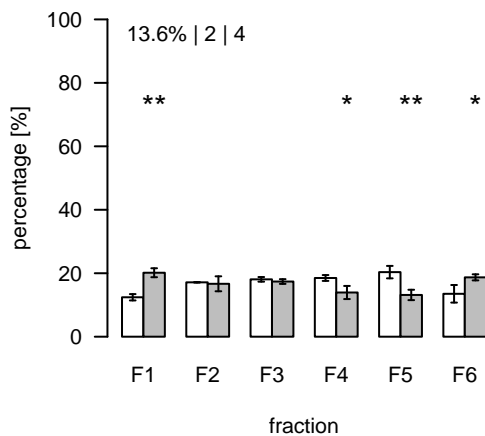

**L2343 (m/z=748.547179; rt=11.32849)**  
T/S Cluster: L-11.3-25

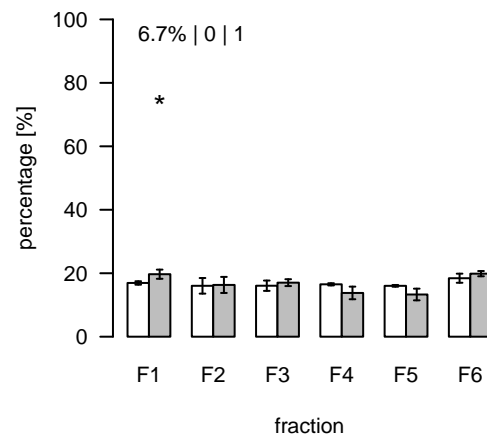

**L2354 (m/z=703.417787; rt=11.32855)**  
T/S Cluster: L-11.3-26

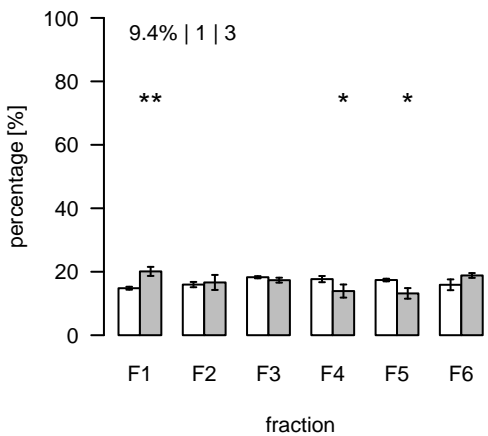

**L2356 (m/z=1051.801085; rt=11.32857)**  
T/S Cluster: L-11.3-27

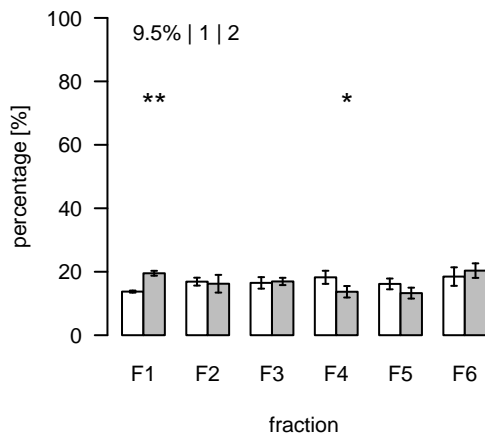

**L2361 (m/z=792.609465; rt=11.3286)**  
T/S Cluster: L-11.3-28

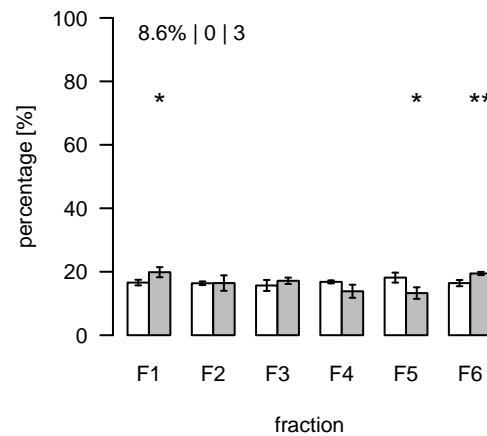

**L2363 (m/z=702.416983; rt=11.32864)**  
T/S Cluster: L-11.3-29

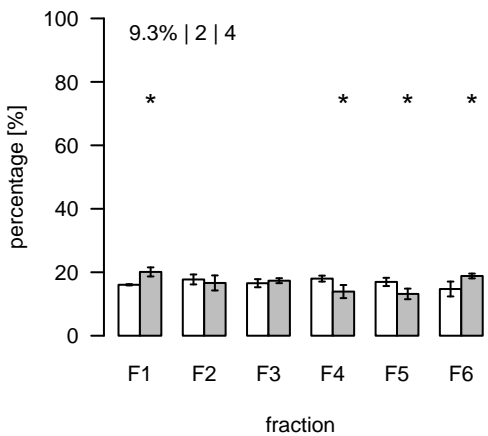

**L2373 (m/z=1050.797211; rt=11.32884)**  
T/S Cluster: L-11.3-30

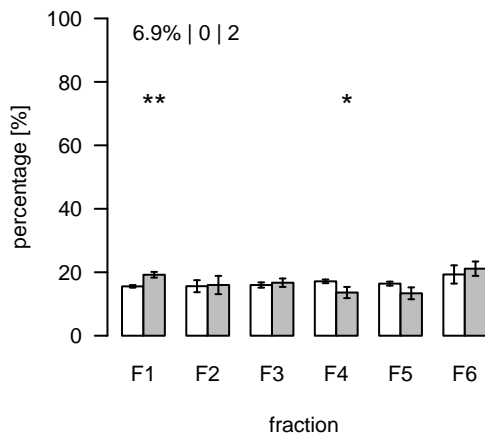

**L2374 (m/z=701.415179; rt=11.32885)**  
T/S Cluster: L-11.3-31

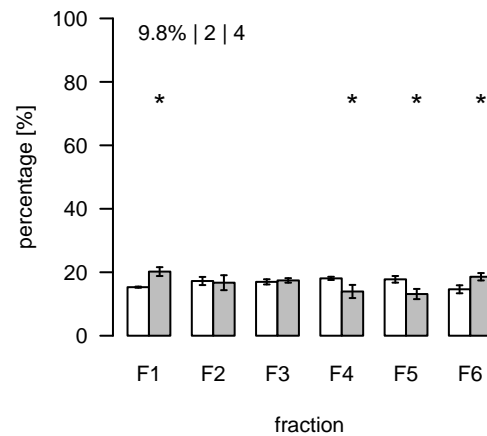

**L2380 (m/z=701.395233; rt=11.32906)**  
T/S Cluster: L-11.3-31

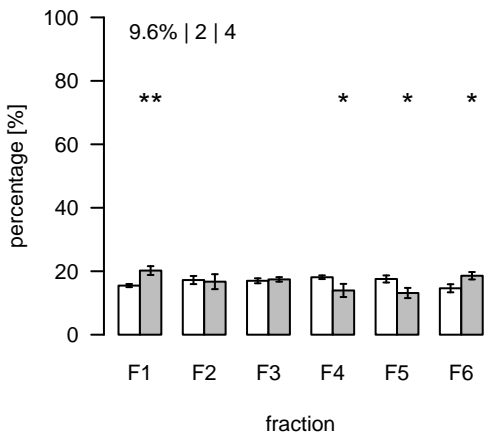

**L2376 (m/z=1052.80444; rt=11.32897)**  
T/S Cluster: L-11.3-32

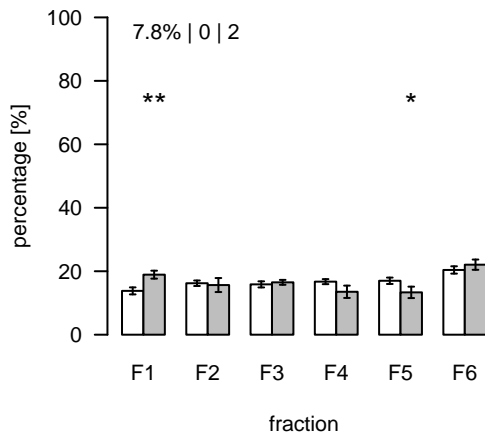

**L2379 (m/z=726.466195; rt=11.32905)**  
T/S Cluster: L-11.3-33

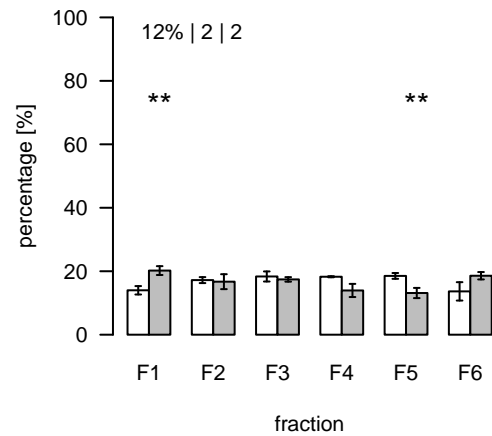

**L2384 (m/z=350.707413; rt=11.32936)**  
T/S Cluster: L-11.3-34

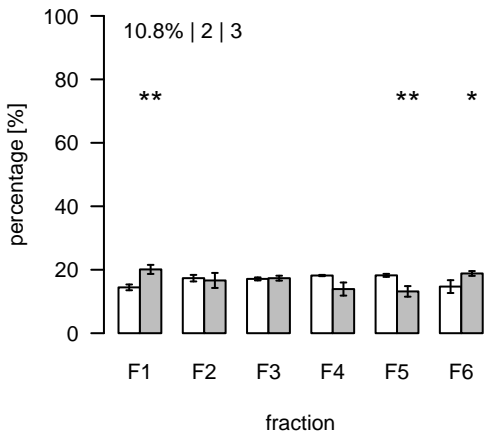

**L2385 (m/z=1056.756066; rt=11.3302)**  
T/S Cluster: L-11.3-35

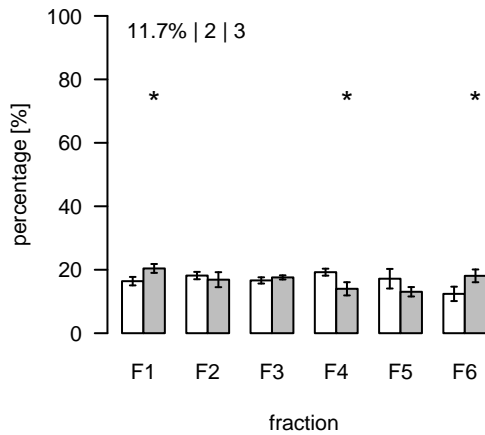

**L2386 (m/z=1055.752726; rt=11.33073)**  
T/S Cluster: L-11.3-36

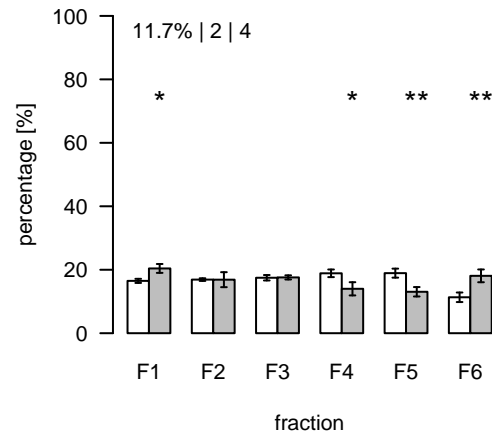

**L2387 (m/z=1213.08701; rt=11.33755)**  
T/S Cluster: L-11.3-37

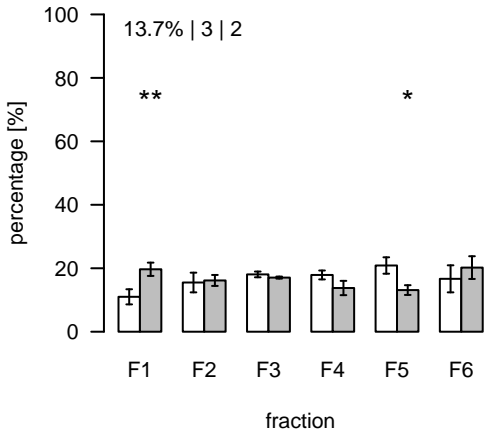

**L2388 (m/z=1214.090706; rt=11.33923)**  
T/S Cluster: L-11.3-38

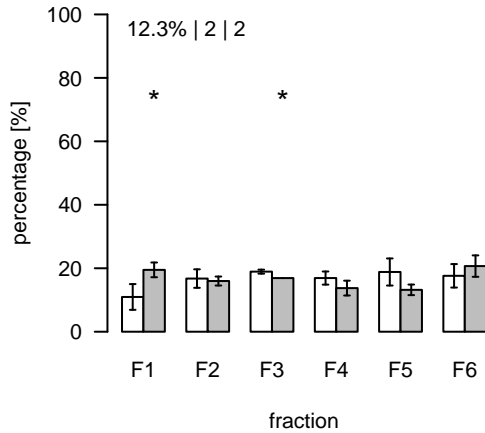

**L2389 (m/z=550.632; rt=11.34431)**  
T/S Cluster: L-11.3-39

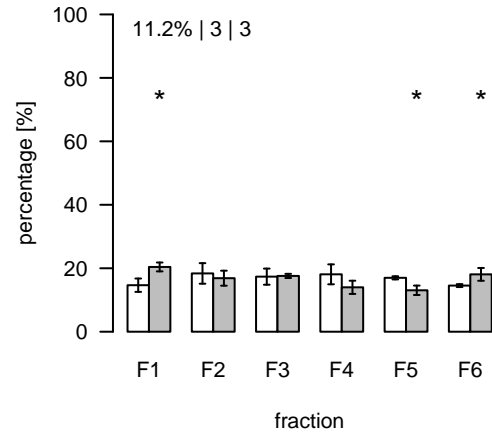



**L2392 (m/z=550.619373; rt=11.34469)**  
T/S Cluster: L-11.3-39

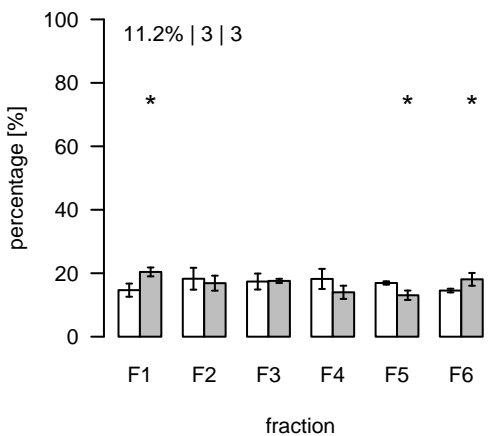

**L2390 (m/z=551.636876; rt=11.34439)**  
T/S Cluster: L-11.3-39

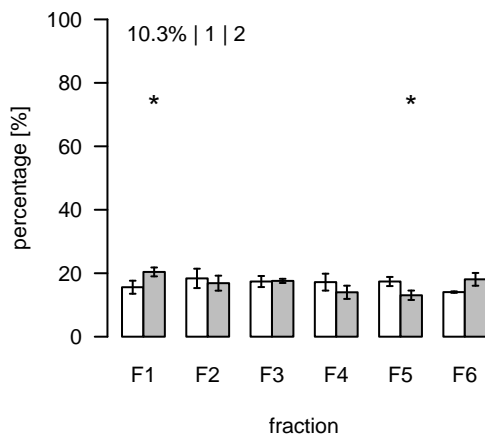

**L2391 (m/z=551.626819; rt=11.34467)**  
T/S Cluster: L-11.3-39

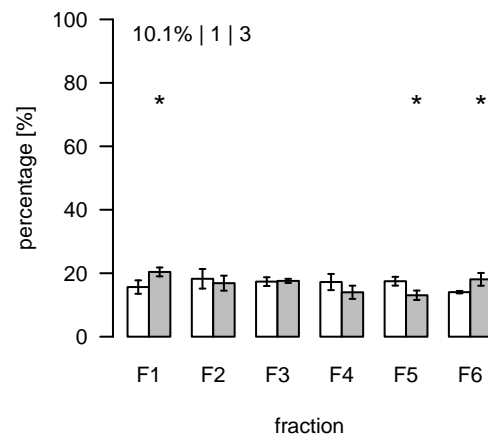

**L2393 (m/z=275.315883; rt=11.3459)**  
T/S Cluster: L-11.3-39

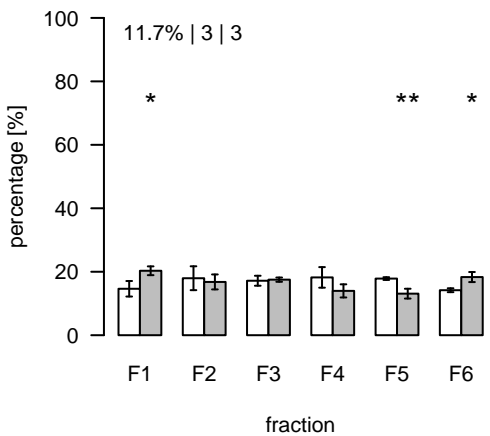

**L2395 (m/z=869.551428; rt=11.37292)**  
T/S Cluster: L-11.4-1

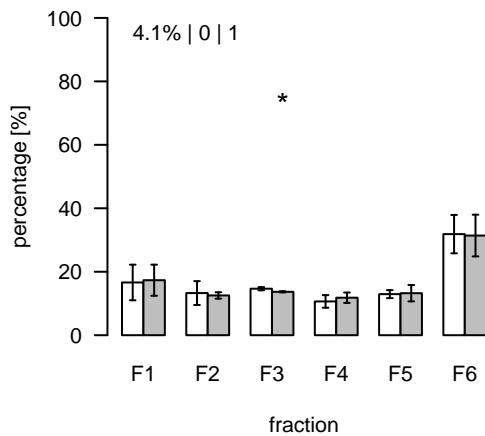

**L2394 (m/z=869.562818; rt=11.37207)**  
T/S Cluster: L-11.4-1

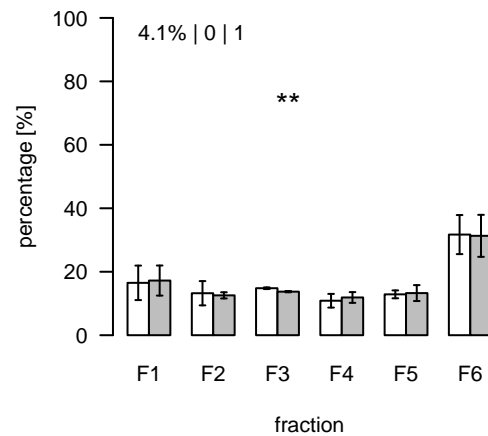

**L2397 (m/z=826.680626; rt=11.41241)**  
T/S Cluster: L-11.4-2

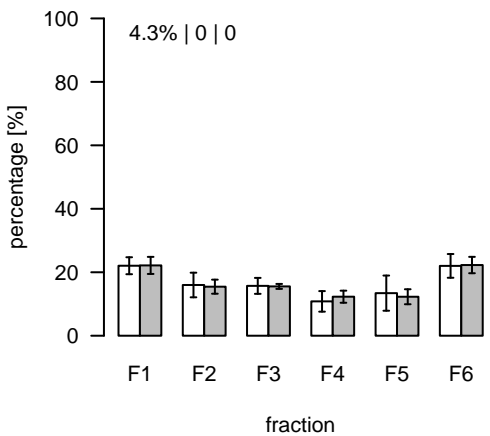

**L2396 (m/z=827.683695; rt=11.4115)**  
T/S Cluster: L-11.4-2

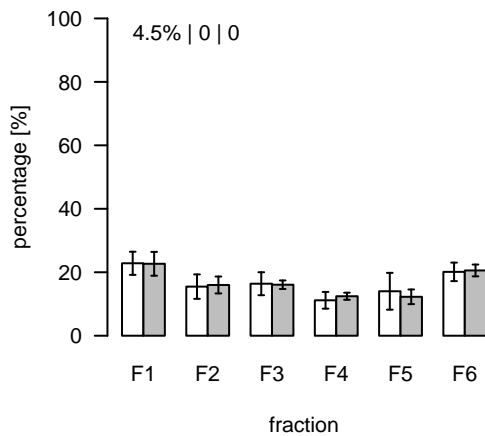

**L2406 (m/z=887.571642; rt=11.5161)**  
T/S Cluster: L-11.5-1

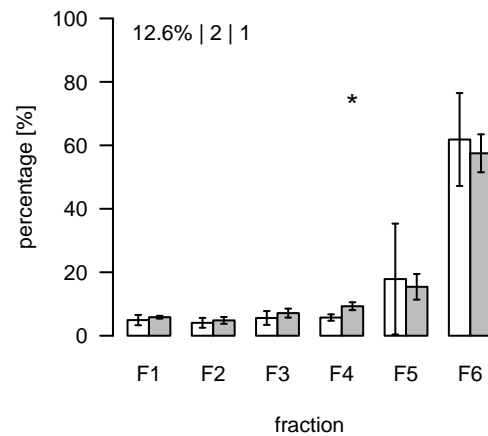

**L2403 (m/z=888.575064; rt=11.51585)**  
T/S Cluster: L-11.5-1

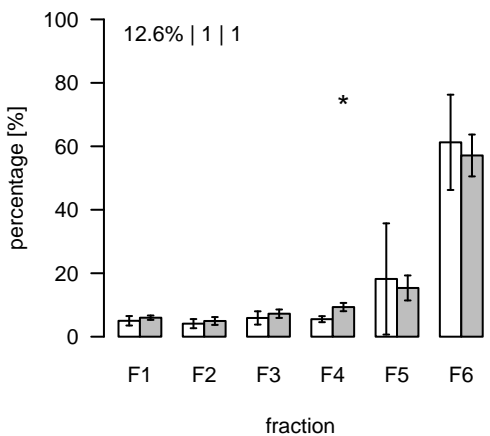

**L2400 (m/z=889.57905; rt=11.5157)**  
T/S Cluster: L-11.5-1

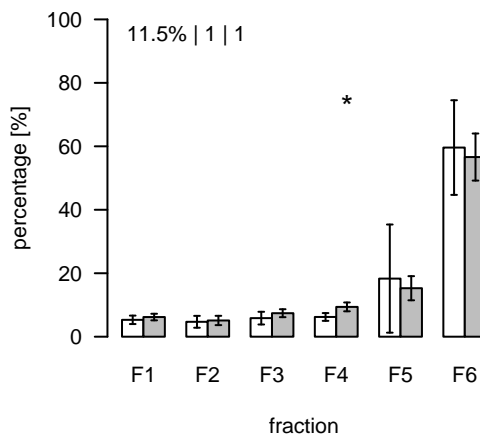

**L2399 (m/z=909.556449; rt=11.51535)**  
T/S Cluster: L-11.5-1

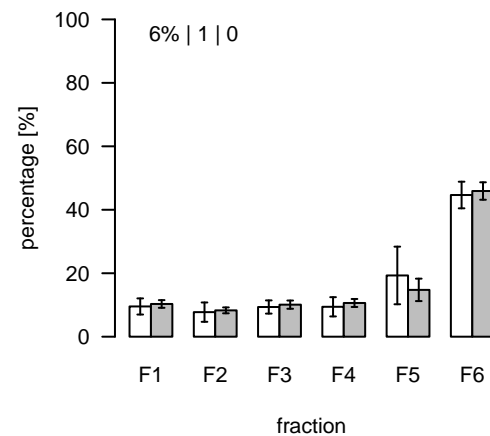

**L2398 (m/z=909.526332; rt=11.51527)**  
T/S Cluster: L-11.5-1

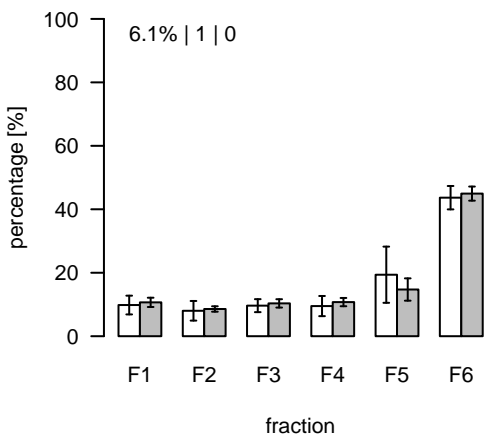

**L2404 (m/z=888.518256; rt=11.51588)**  
T/S Cluster: L-11.5-1

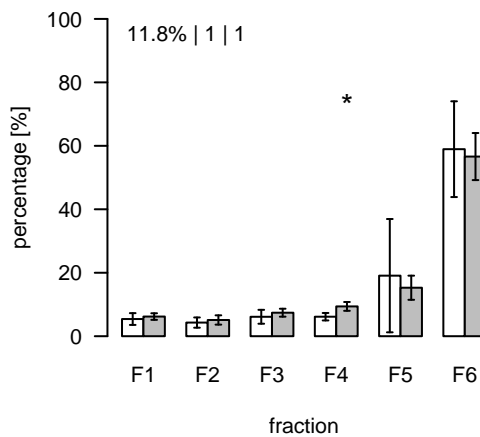

**L2407 (m/z=443.78275; rt=11.5161)**  
T/S Cluster: L-11.5-1

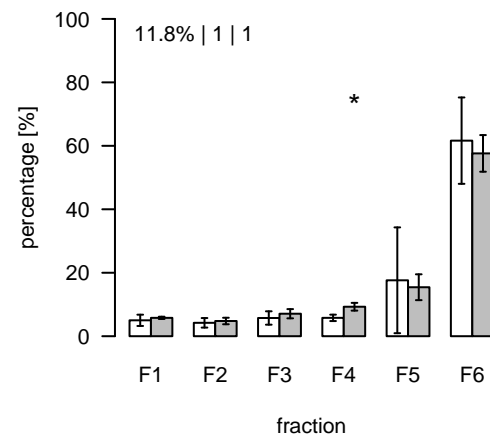

**L2408 (m/z=443.790071; rt=11.51613)**  
T/S Cluster: L-11.5-1

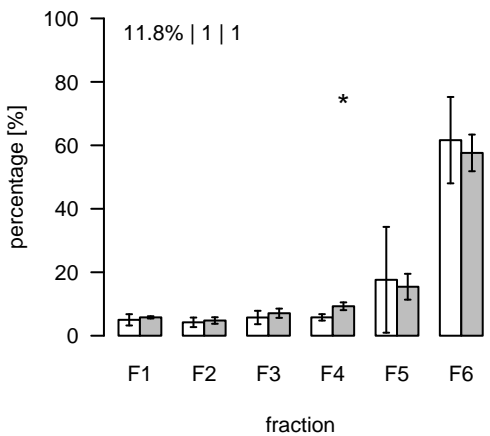

**L2409 (m/z=887.500834; rt=11.51623)**  
T/S Cluster: L-11.5-1

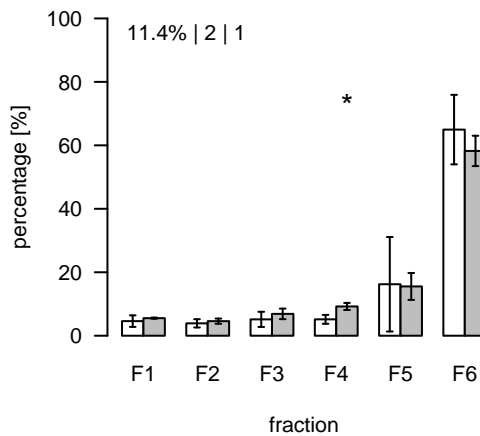

**L2402 (m/z=910.54396; rt=11.51584)**  
T/S Cluster: L-11.5-1

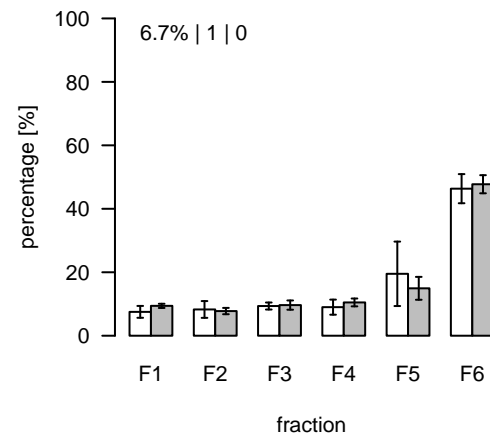

**L2405 (m/z=910.566431; rt=11.51605)**  
T/S Cluster: L-11.5-1

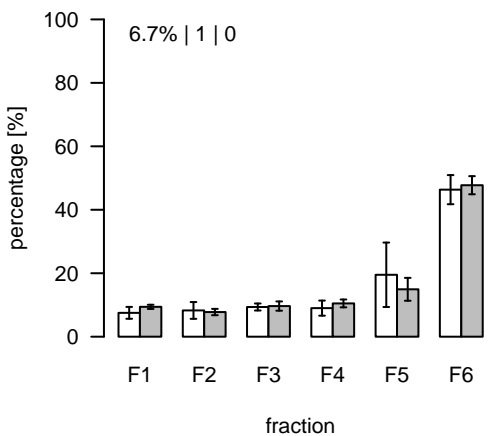

**L2401 (m/z=889.535435; rt=11.51574)**  
T/S Cluster: L-11.5-1

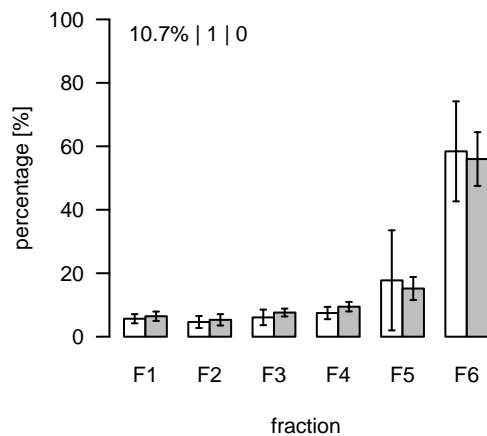

**L2410 (m/z=680.482781; rt=11.5809)**  
T/S Cluster: L-11.6-1

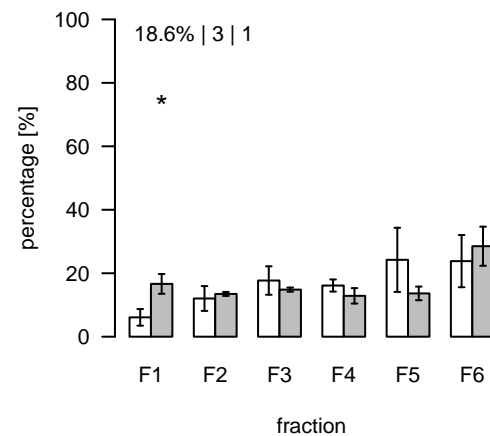

**L2417 (m/z=663.439258; rt=11.59978)**  
T/S Cluster: L-11.6-1

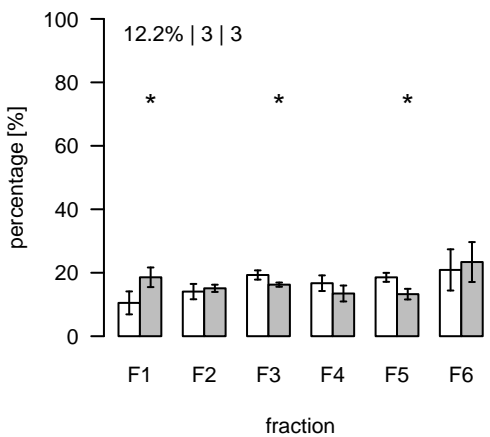

**L2411 (m/z=681.486847; rt=11.58174)**  
T/S Cluster: L-11.6-1

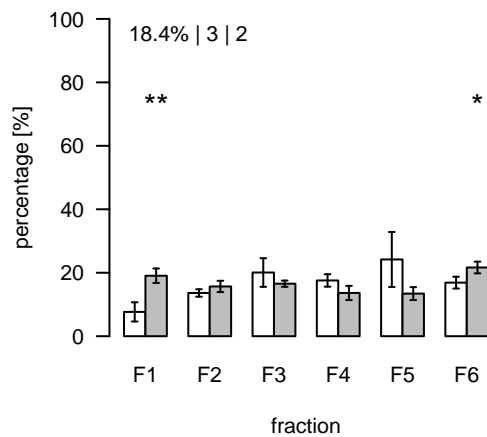

**L2416 (m/z=663.457354; rt=11.59843)**  
T/S Cluster: L-11.6-1

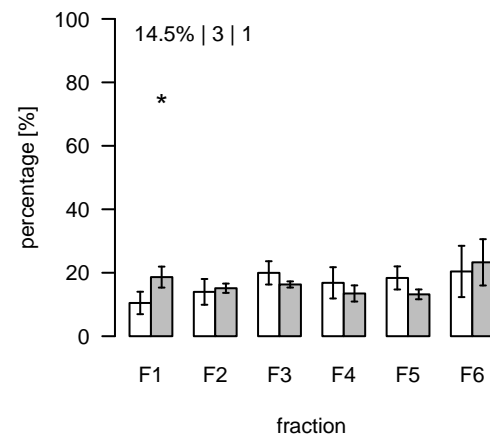

**L2414 (m/z=708.51493; rt=11.58856)**  
T/S Cluster: L-11.6-2

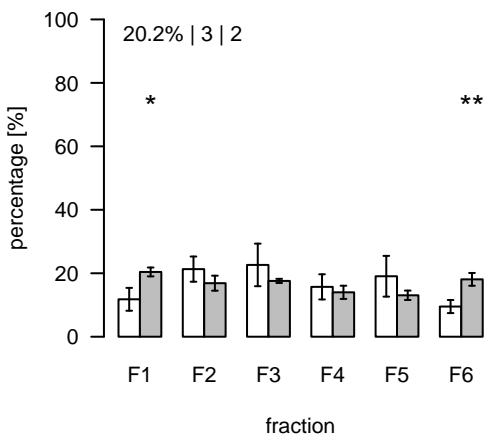

**L2412 (m/z=709.519721; rt=11.58576)**  
T/S Cluster: L-11.6-2

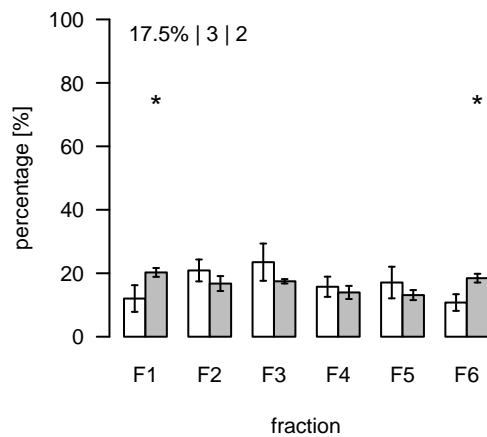

**L2415 (m/z=708.486373; rt=11.58879)**  
T/S Cluster: L-11.6-2

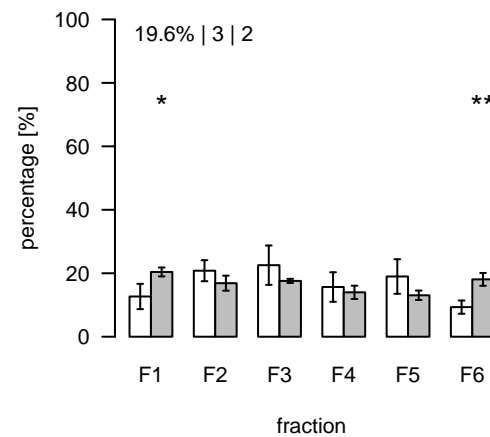

**L2413 (m/z=709.497356; rt=11.588)**  
T/S Cluster: L-11.6-2

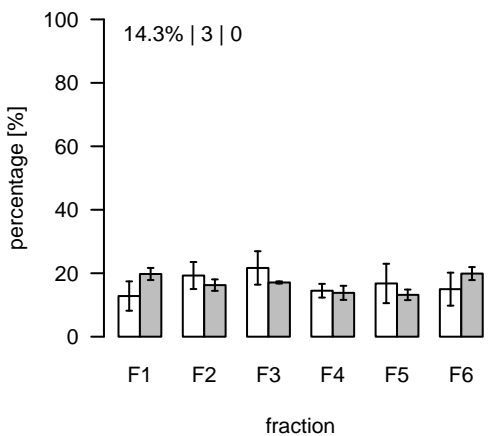

**L2418 (m/z=867.676689; rt=11.72504)**  
T/S Cluster: L-11.7-1

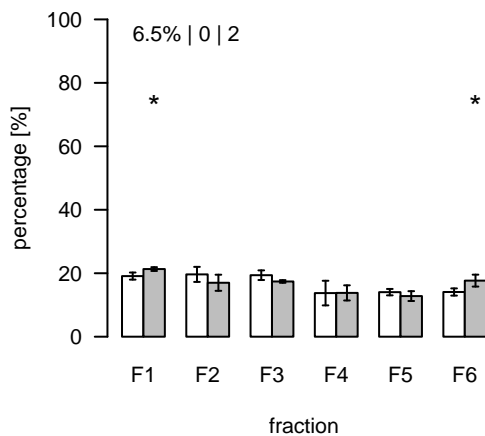

**L2419 (m/z=866.673142; rt=11.72548)**  
T/S Cluster: L-11.7-2

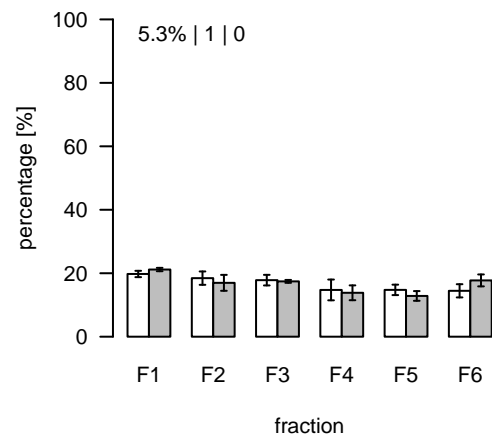

**L2433 (m/z=844.692724; rt=11.74157)**  
T/S Cluster: L-11.7-3

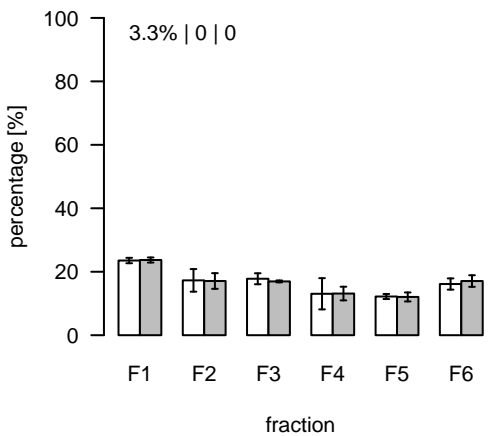

**L2427 (m/z=844.663565; rt=11.74066)**  
T/S Cluster: L-11.7-3

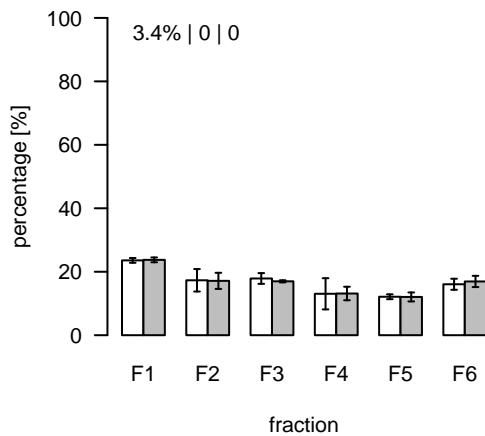

**L2430 (m/z=845.696883; rt=11.74123)**  
T/S Cluster: L-11.7-3

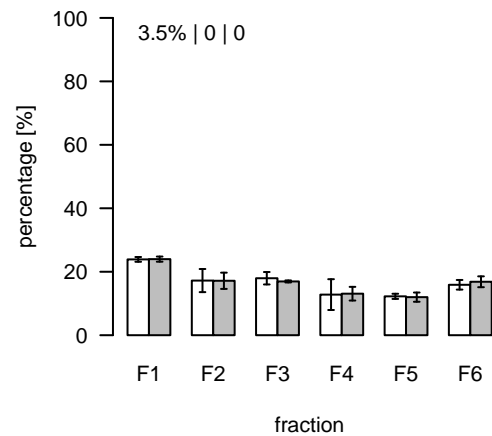

**L2426 (m/z=845.667029; rt=11.74026)**  
T/S Cluster: L-11.7-3

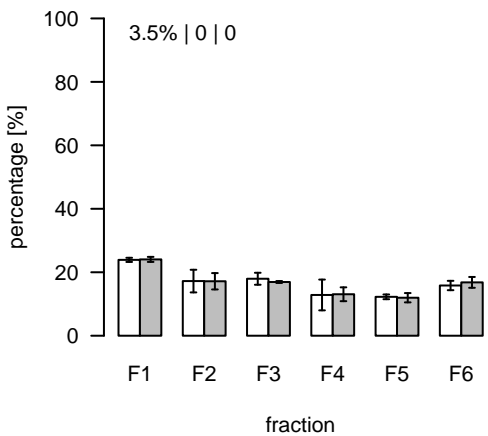

**L2429 (m/z=846.700909; rt=11.74101)**  
T/S Cluster: L-11.7-3

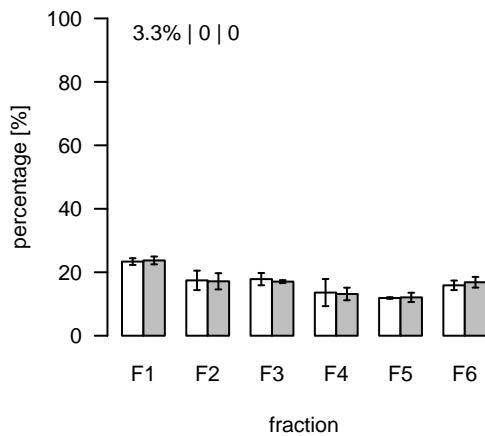

**L2425 (m/z=846.673095; rt=11.73995)**  
T/S Cluster: L-11.7-3

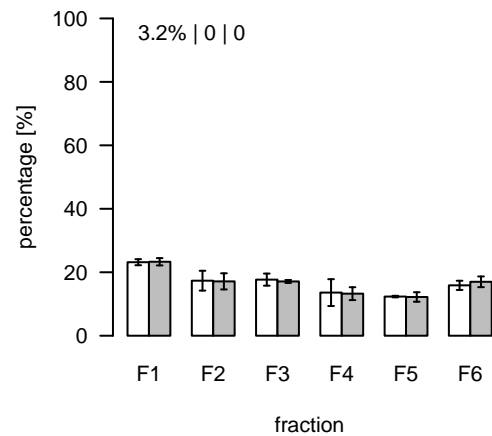

**L2436 (m/z=422.35151; rt=11.74282)**  
T/S Cluster: L-11.7-3

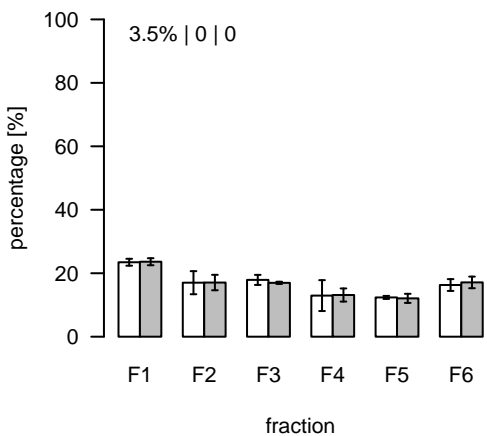

**L2432 (m/z=422.344261; rt=11.7414)**  
T/S Cluster: L-11.7-3

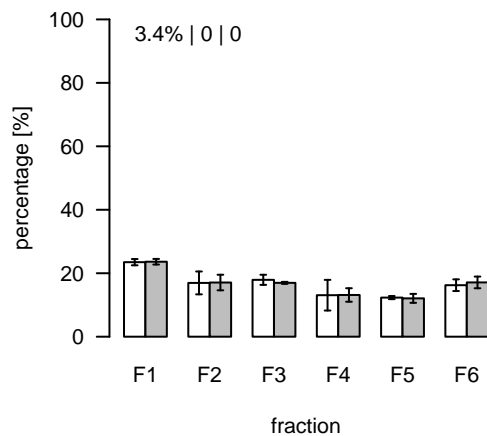

**L2420 (m/z=870.707181; rt=11.72584)**  
T/S Cluster: L-11.7-3

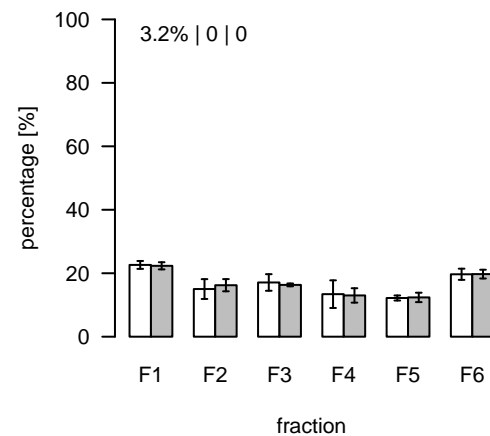

**L2428 (m/z=422.846269; rt=11.74095)**  
T/S Cluster: L-11.7-3

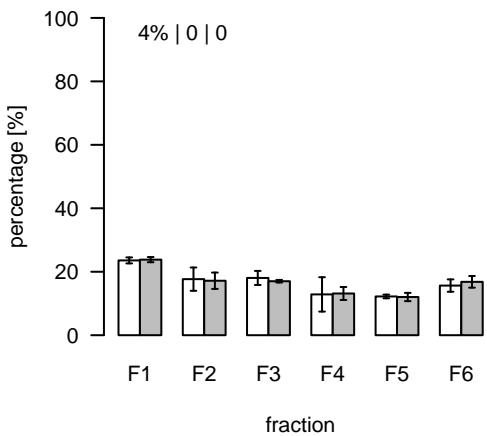

**L2434 (m/z=422.853132; rt=11.74233)**  
T/S Cluster: L-11.7-3

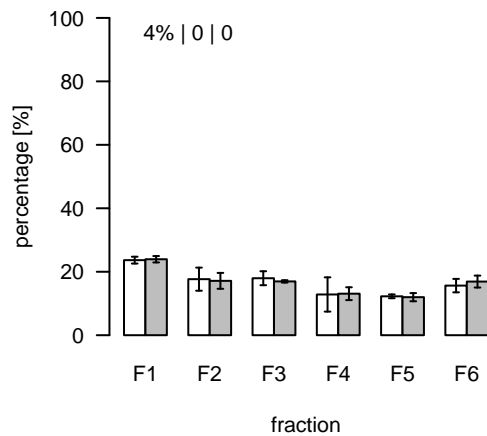

**L2422 (m/z=861.718459; rt=11.73707)**  
T/S Cluster: L-11.7-3

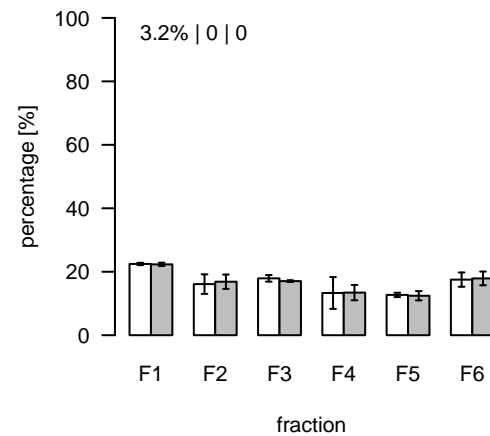

**L2439 (m/z=682.637905; rt=11.74877)**  
T/S Cluster: L-11.7-3

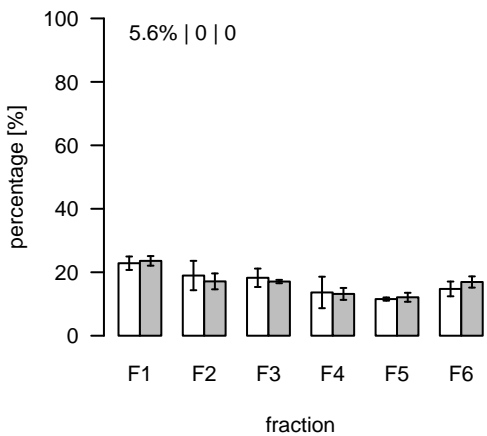

**L2435 (m/z=281.568027; rt=11.74278)**  
T/S Cluster: L-11.7-3

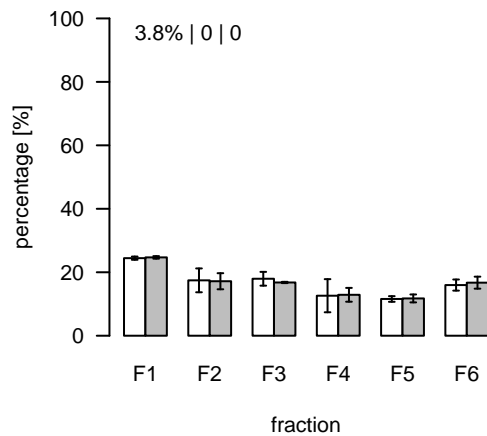

**L2421 (m/z=871.714867; rt=11.72596)**  
T/S Cluster: L-11.7-3

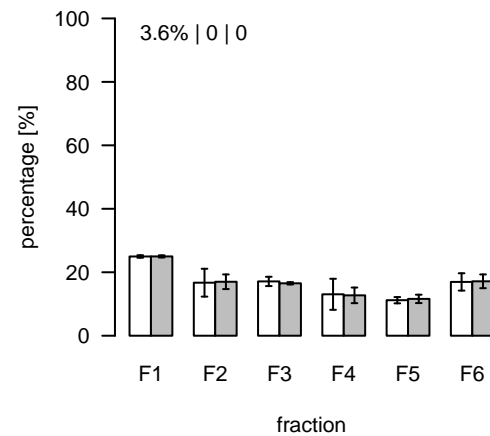

**L2424 (m/z=872.715793; rt=11.73938)**  
T/S Cluster: L-11.7-3

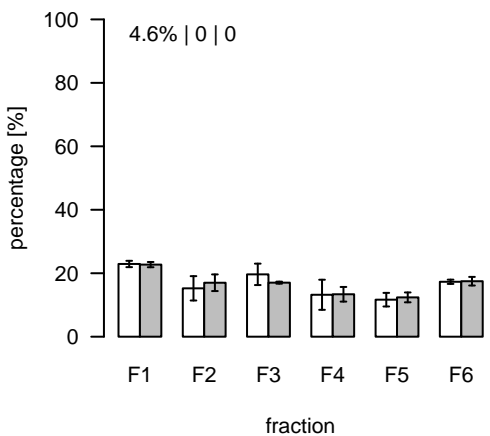

**L2431 (m/z=847.700646; rt=11.74134)**  
T/S Cluster: L-11.7-3

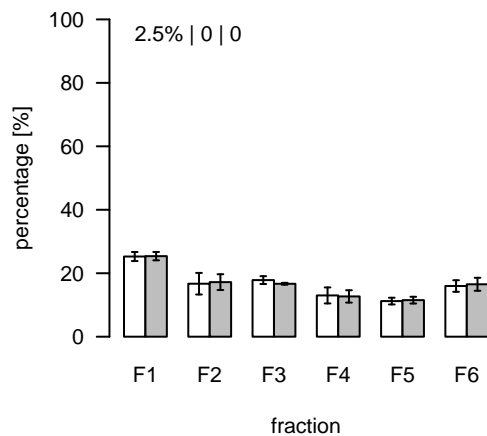

**L2423 (m/z=862.72174; rt=11.73858)**  
T/S Cluster: L-11.7-3

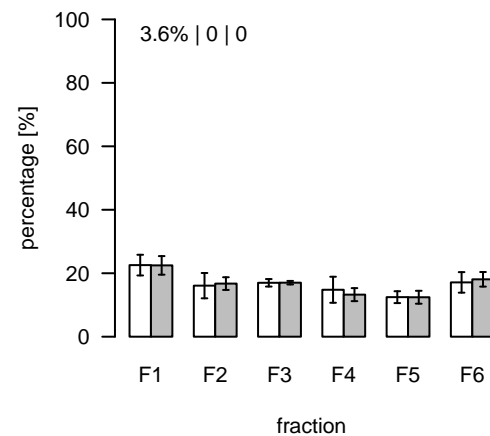

**L2438 (m/z=281.902648; rt=11.74443)**  
T/S Cluster: L-11.7-3

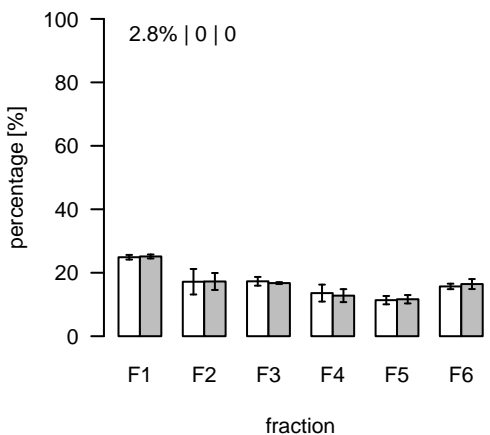

**L2437 (m/z=423.350114; rt=11.74434)**  
T/S Cluster: L-11.7-3

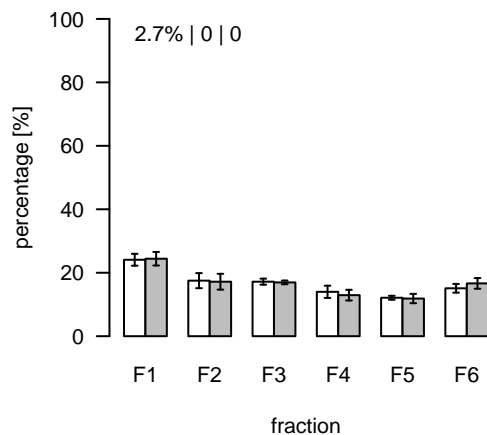

**L2440 (m/z=683.640895; rt=11.75127)**  
T/S Cluster: L-11.8-1

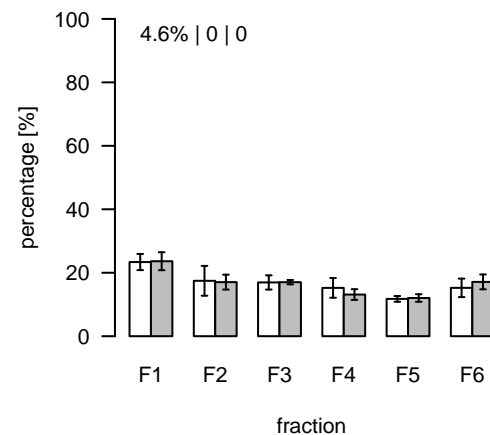

**L2442 (m/z=909.538883; rt=11.82861)**  
T/S Cluster: L-11.8-2

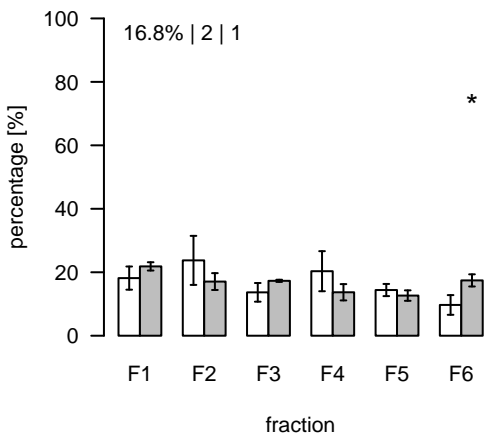

**L2441 (m/z=909.520182; rt=11.82738)**  
T/S Cluster: L-11.8-2

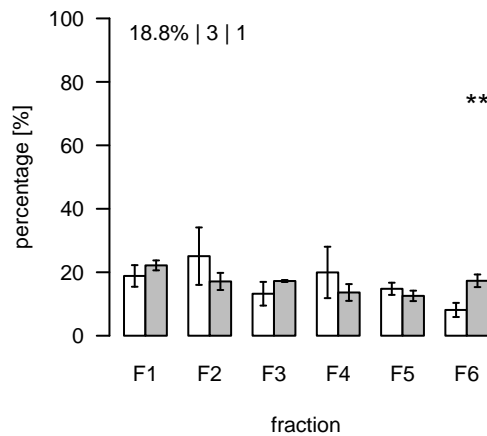

**L2444 (m/z=894.566155; rt=11.83263)**  
T/S Cluster: L-11.8-3

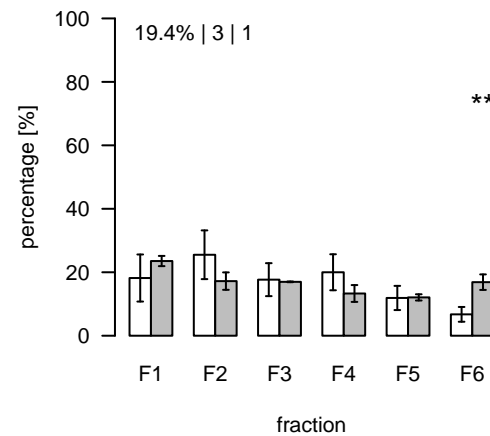

**L2443 (m/z=895.568809; rt=11.82929)**  
T/S Cluster: L-11.8-3

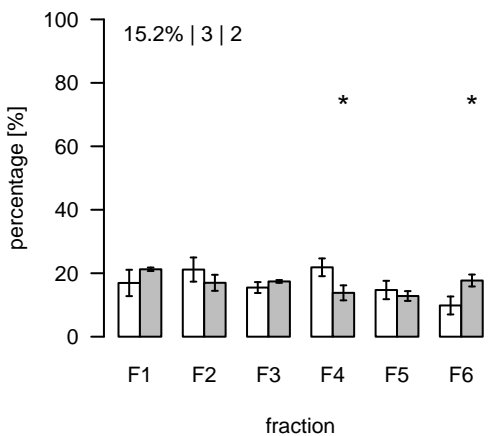

**L2445 (m/z=218.149256; rt=11.84418)**  
T/S Cluster: L-11.8-4

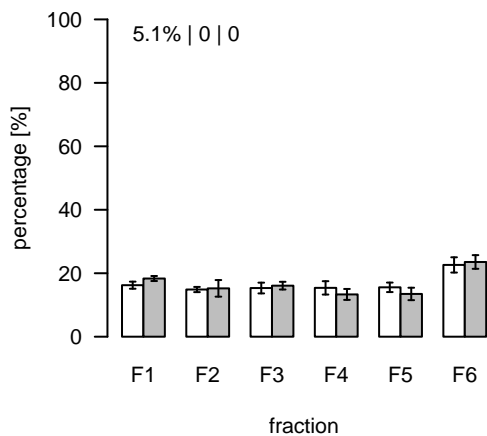

**L2464 (m/z=871.575923; rt=11.84909)**  
T/S Cluster: L-11.8-5

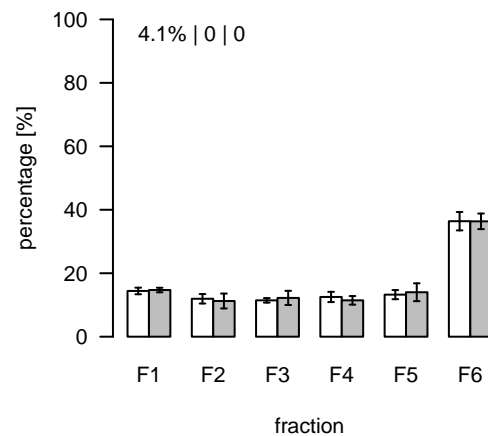

**L2462 (m/z=872.580227; rt=11.84842)**  
T/S Cluster: L-11.8-5

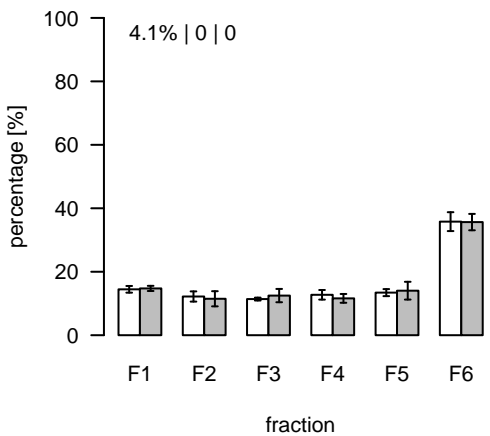

**L2456 (m/z=873.584403; rt=11.84768)**  
T/S Cluster: L-11.8-5

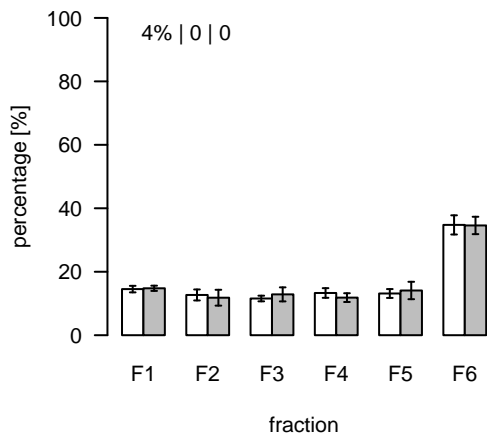

**L2469 (m/z=435.78969; rt=11.84987)**  
T/S Cluster: L-11.8-5

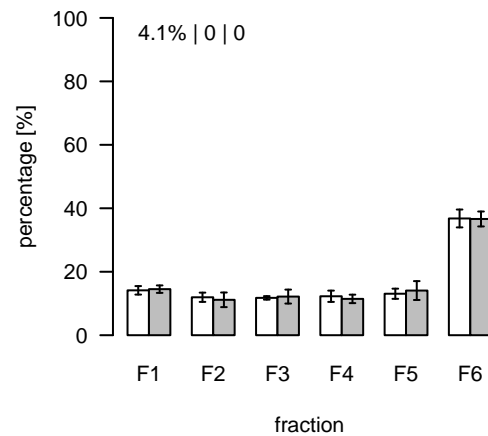

**L2465 (m/z=436.291794; rt=11.8491)**  
T/S Cluster: L-11.8-5

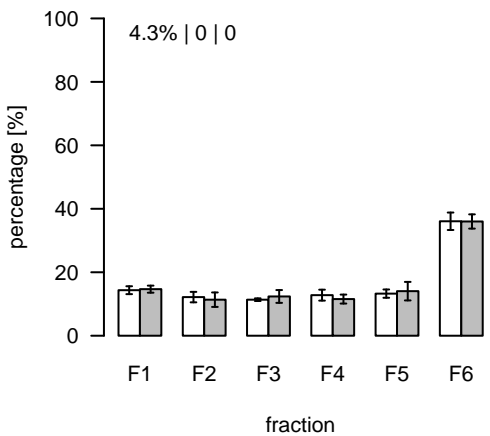

**L2457 (m/z=873.532237; rt=11.84774)**  
T/S Cluster: L-11.8-5

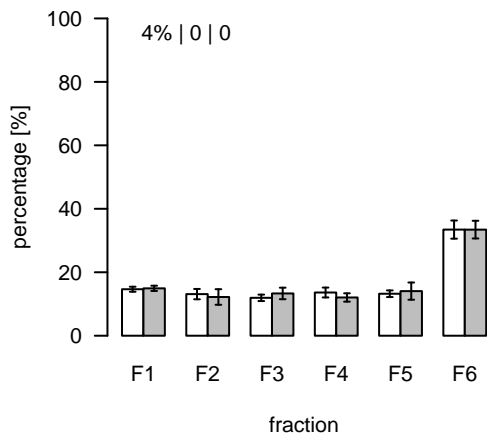

**L2466 (m/z=290.530423; rt=11.84911)**  
T/S Cluster: L-11.8-5

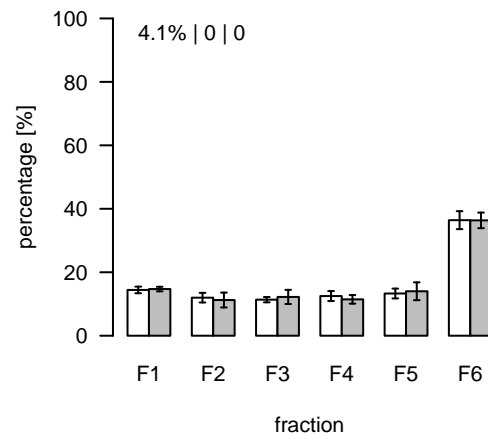

**L2453 (m/z=874.588761; rt=11.84737)**  
T/S Cluster: L-11.8-5

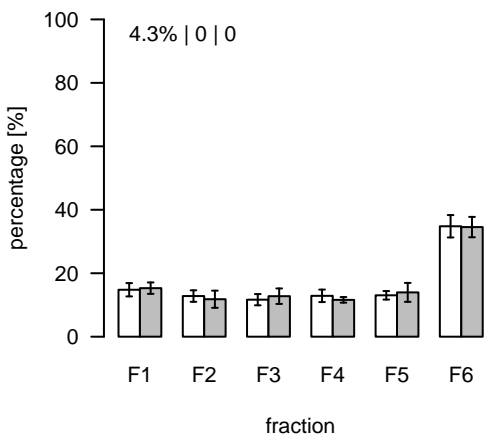

**L2461 (m/z=290.865125; rt=11.84829)**  
T/S Cluster: L-11.8-5

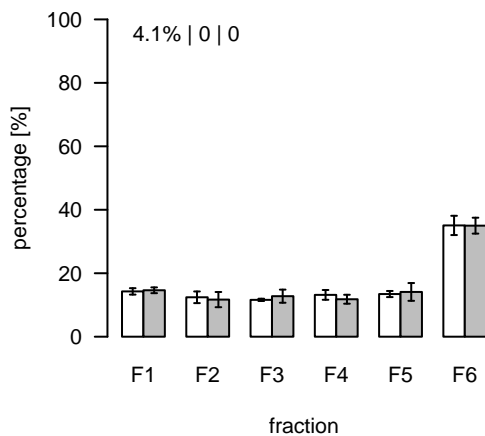

**L2458 (m/z=436.797365; rt=11.84777)**  
T/S Cluster: L-11.8-5

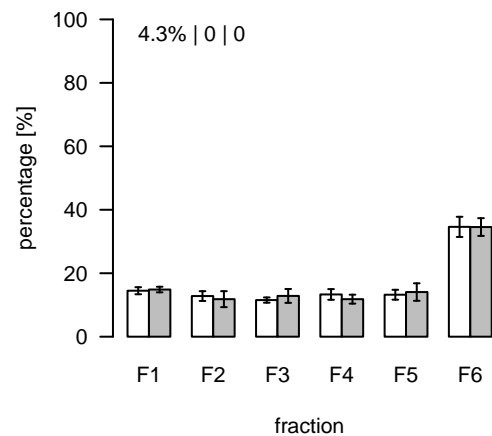

**L2459 (m/z=436.789791; rt=11.8479)**  
T/S Cluster: L-11.8-5

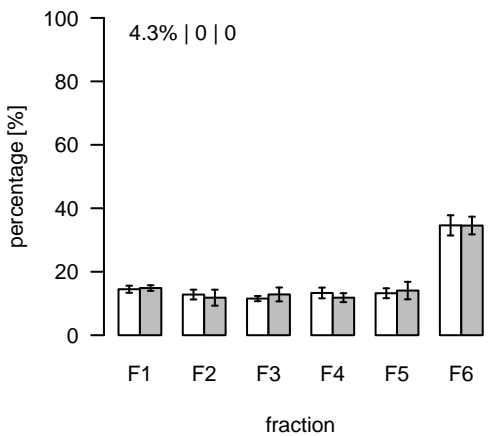

**L2452 (m/z=874.550347; rt=11.84729)**  
T/S Cluster: L-11.8-5

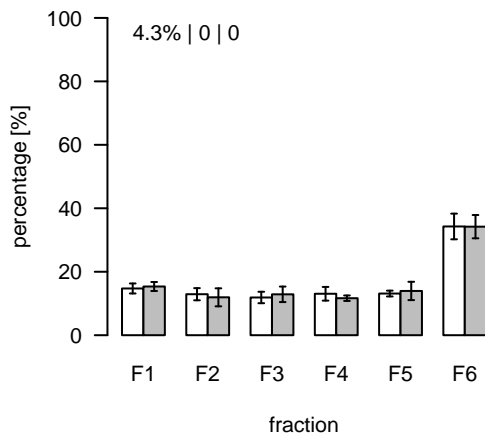

**L2463 (m/z=290.859394; rt=11.84906)**  
T/S Cluster: L-11.8-5

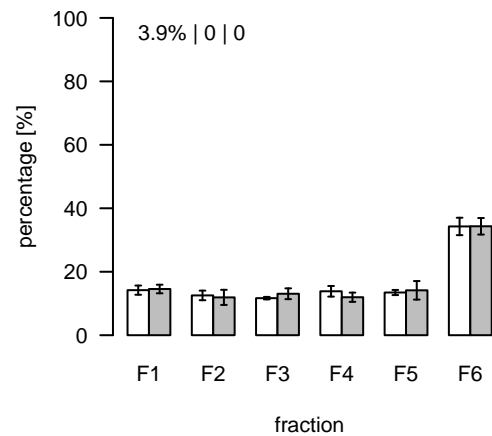

**L2467 (m/z=436.275827; rt=11.84914)**  
T/S Cluster: L-11.8-5

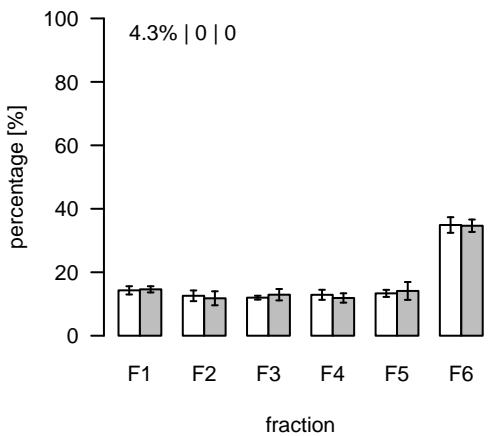

**L2451 (m/z=291.20023; rt=11.84631)**  
T/S Cluster: L-11.8-5

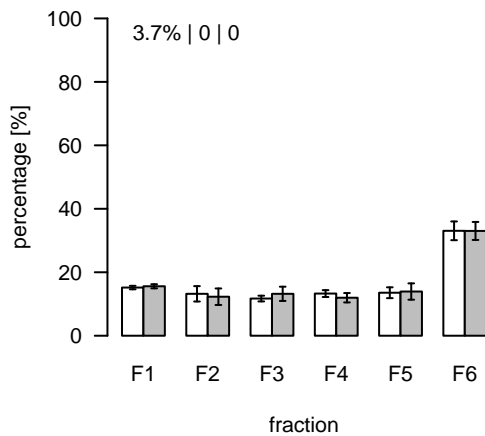

**L2454 (m/z=875.592652; rt=11.84757)**  
T/S Cluster: L-11.8-5

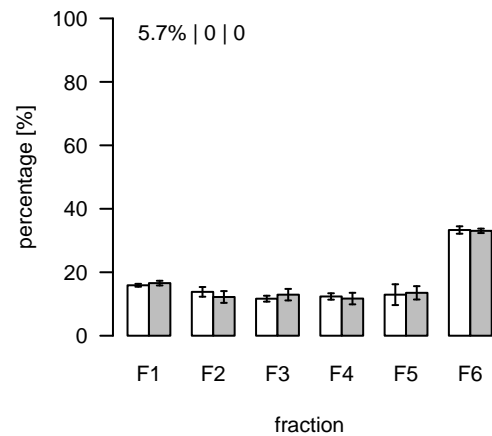



**L2450 (m/z=291.196179; rt=11.84605)**  
T/S Cluster: L-11.8-5

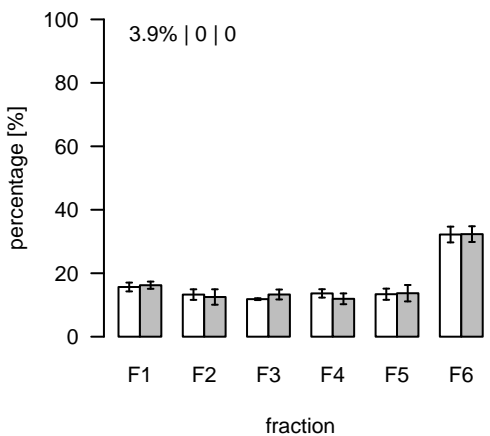

**L2448 (m/z=437.29867; rt=11.84559)**  
T/S Cluster: L-11.8-5

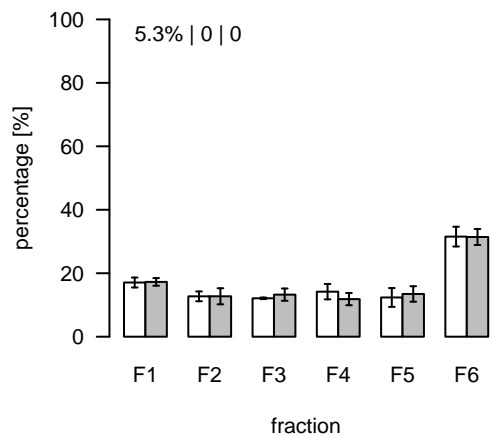

**L2447 (m/z=437.289763; rt=11.84557)**  
T/S Cluster: L-11.8-5

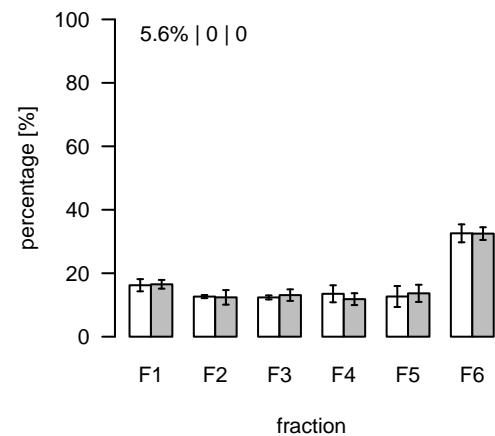

**L2468 (m/z=217.894515; rt=11.84943)**  
T/S Cluster: L-11.8-5

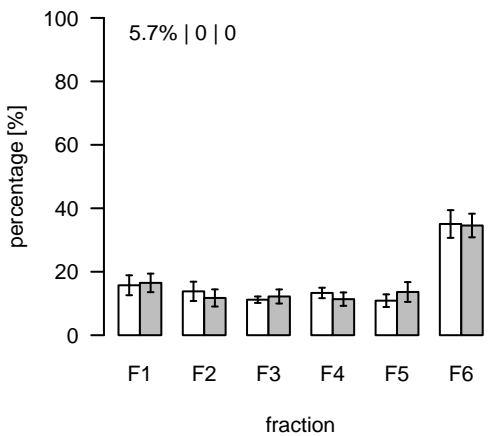

**L2446 (m/z=217.898746; rt=11.84515)**  
T/S Cluster: L-11.8-5

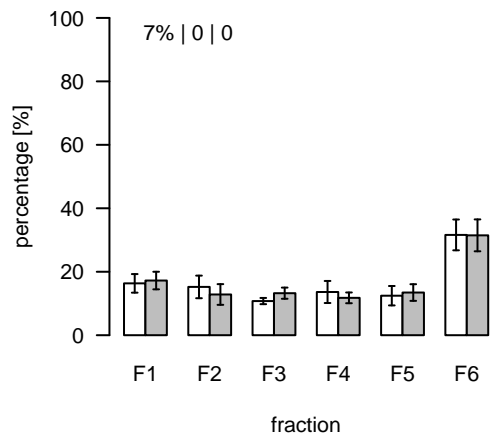

**L2449 (m/z=218.145903; rt=11.84597)**  
T/S Cluster: L-11.8-6

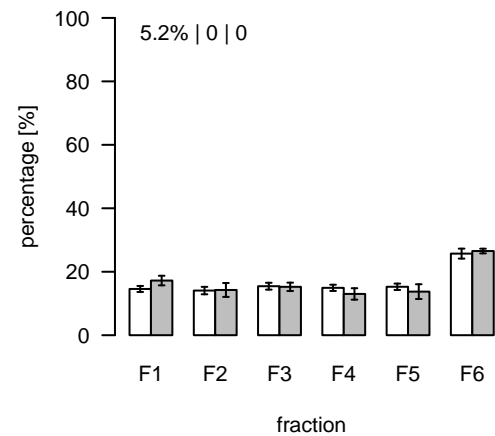

**L2460 (m/z=174.316894; rt=11.84806)**  
T/S Cluster: L-11.8-7

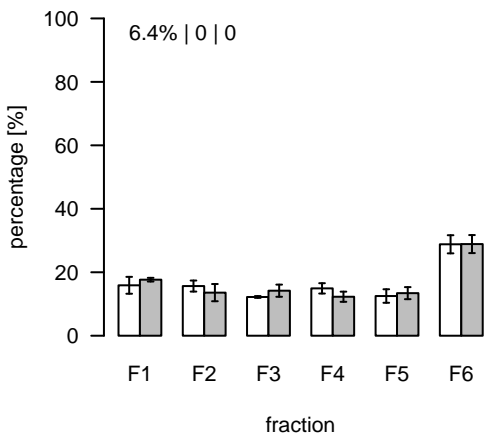

**L2455 (m/z=174.317995; rt=11.84766)**  
T/S Cluster: L-11.8-7

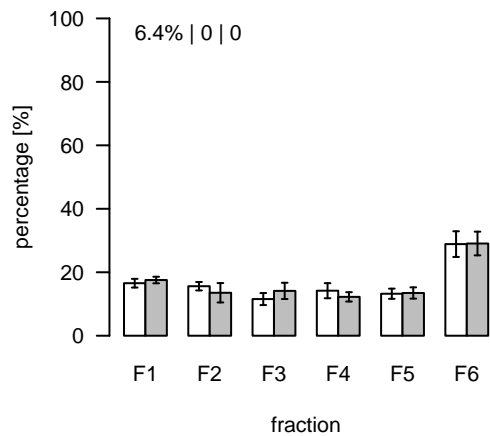

**L2471 (m/z=435.773622; rt=11.8506)**  
T/S Cluster: L-11.9-1

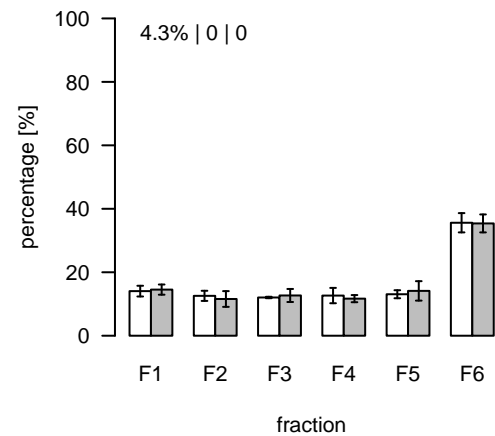

**L2470 (m/z=290.523863; rt=11.85026)**  
T/S Cluster: L-11.9-1

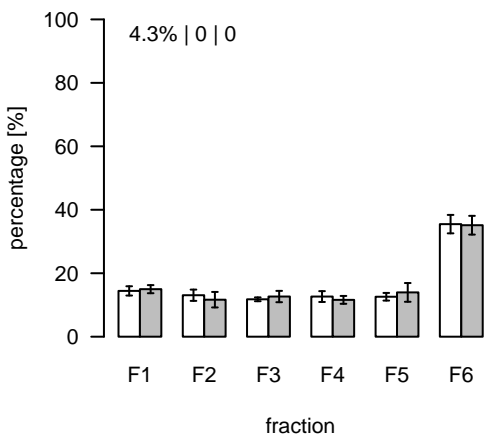

**L2474 (m/z=893.562247; rt=11.85752)**  
T/S Cluster: L-11.9-2

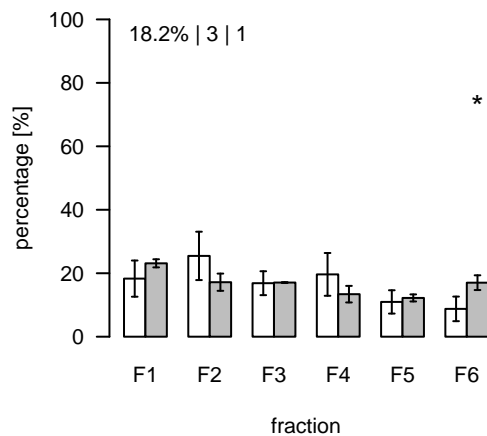

**L2475 (m/z=893.535475; rt=11.86034)**  
T/S Cluster: L-11.9-2

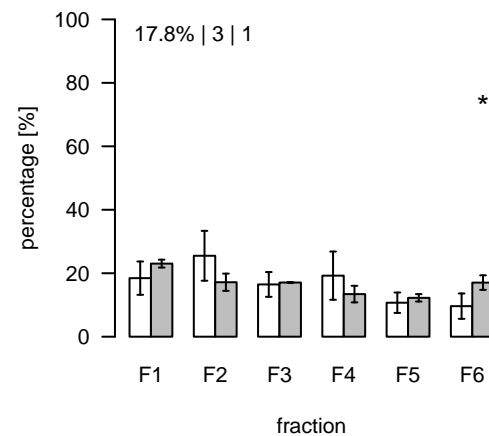

**L2472 (m/z=894.570314; rt=11.85309)**  
T/S Cluster: L-11.9-2

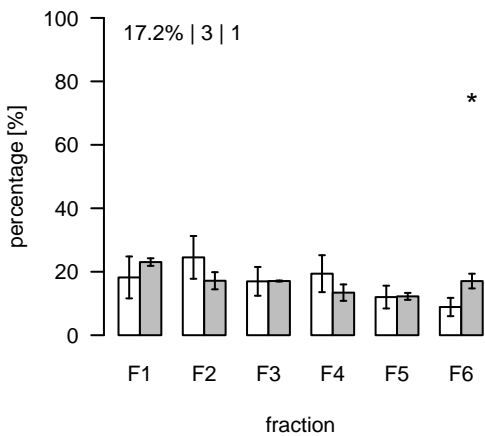

**L2473 (m/z=894.543346; rt=11.85683)**  
T/S Cluster: L-11.9-2

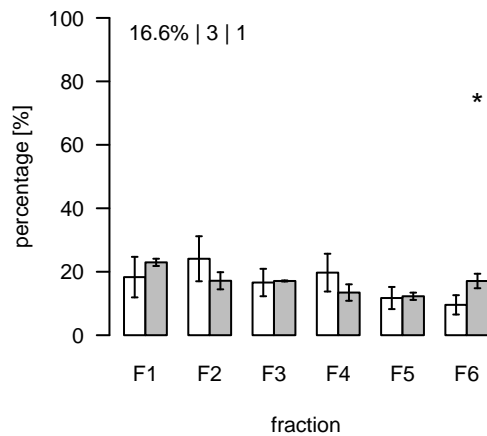

**L2476 (m/z=894.562079; rt=12.02139)**  
T/S Cluster: L-12-1

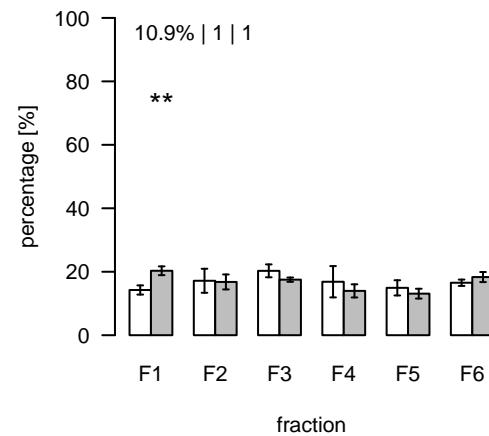

**L2477 (m/z=858.705994; rt=12.26845)**  
T/S Cluster: L-12.3-1

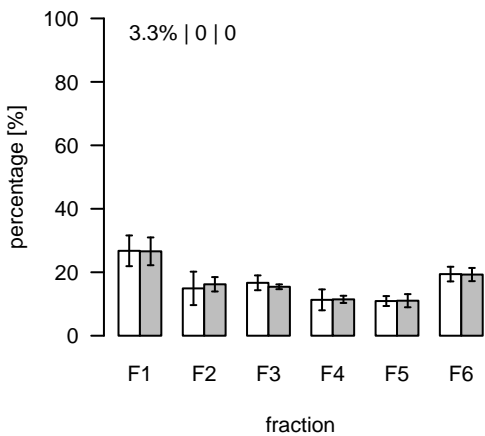

**L2486 (m/z=871.577213; rt=12.3835)**  
T/S Cluster: L-12.4-1

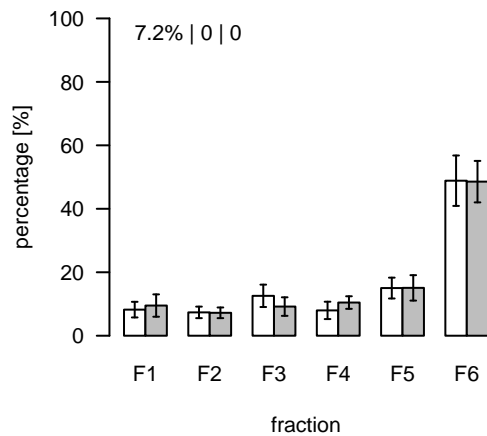

**L2483 (m/z=872.580465; rt=12.38343)**  
T/S Cluster: L-12.4-1

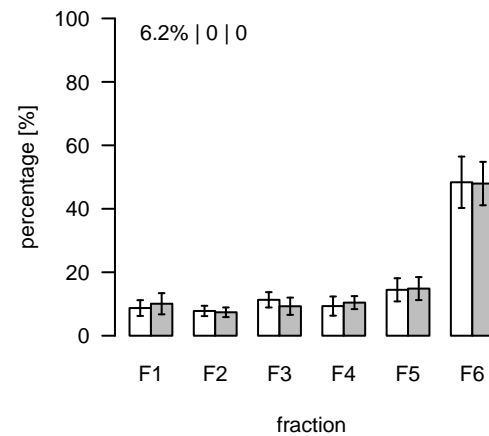

**L2494 (m/z=813.573346; rt=12.40561)**  
T/S Cluster: L-12.4-1

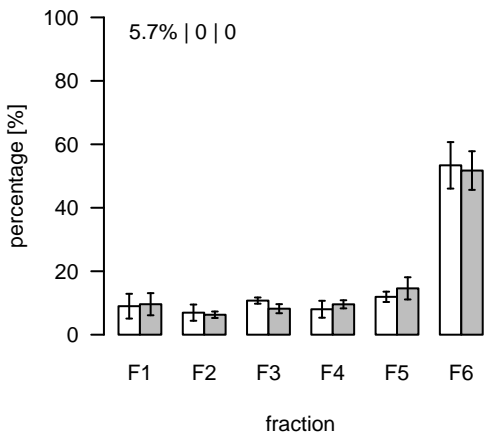

**L2487 (m/z=871.540913; rt=12.38371)**  
T/S Cluster: L-12.4-1

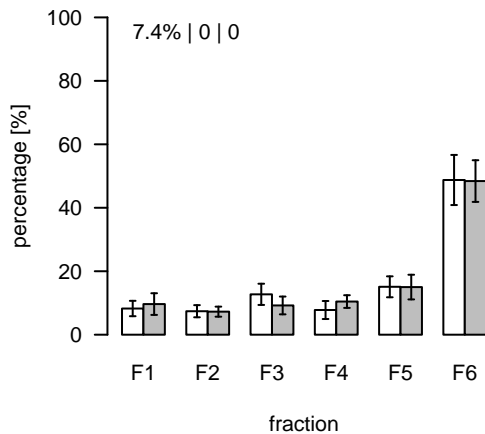

**L2495 (m/z=813.549805; rt=12.40586)**  
T/S Cluster: L-12.4-1

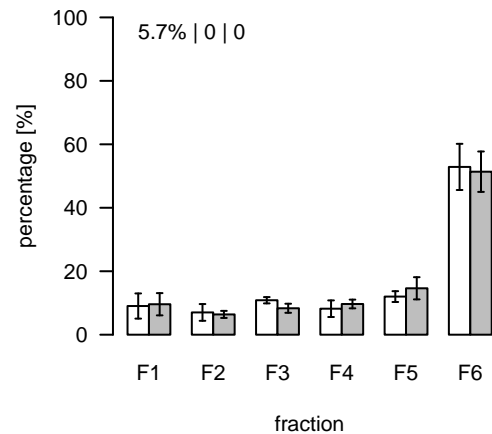

**L2481 (m/z=872.535928; rt=12.38337)**  
T/S Cluster: L-12.4-1

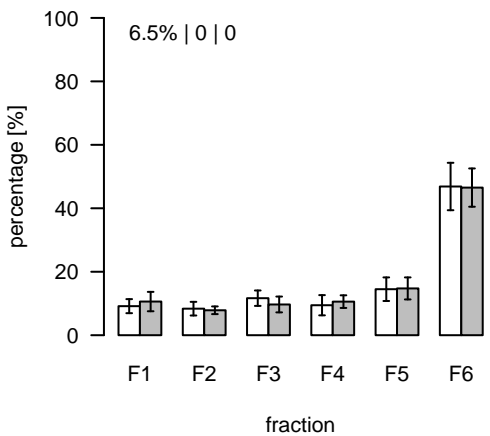

**L2484 (m/z=873.583171; rt=12.38347)**  
T/S Cluster: L-12.4-1

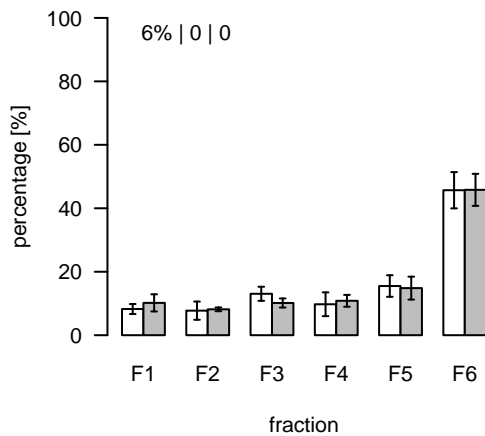

**L2485 (m/z=873.584871; rt=12.38349)**  
T/S Cluster: L-12.4-1

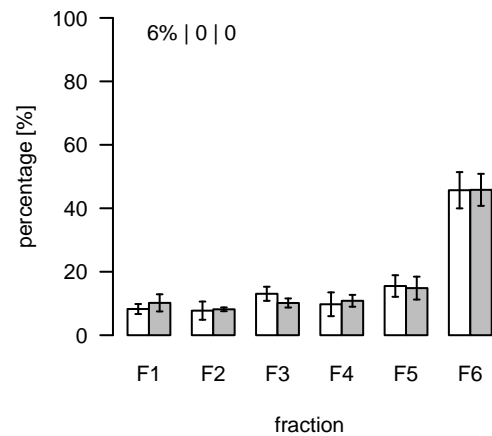

**L2478 (m/z=871.637012; rt=12.38129)**  
T/S Cluster: L-12.4-1

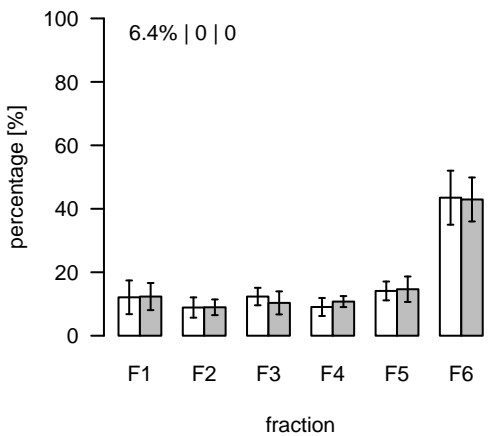

**L2482 (m/z=435.787263; rt=12.38338)**  
T/S Cluster: L-12.4-1

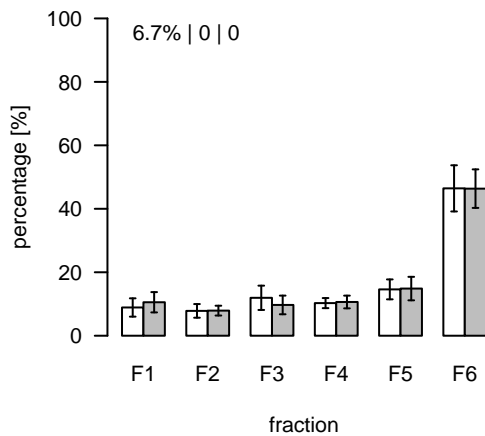

**L2479 (m/z=435.795442; rt=12.38312)**  
T/S Cluster: L-12.4-1

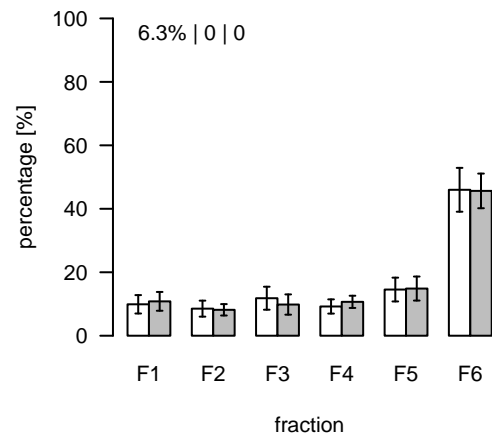

**L2480 (m/z=436.296851; rt=12.38337)**  
T/S Cluster: L-12.4-2

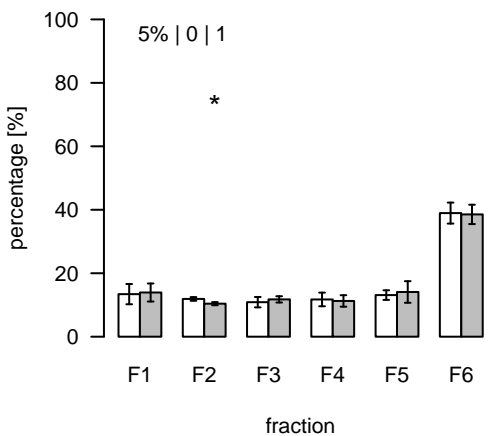

**L2488 (m/z=436.289353; rt=12.38414)**  
T/S Cluster: L-12.4-3

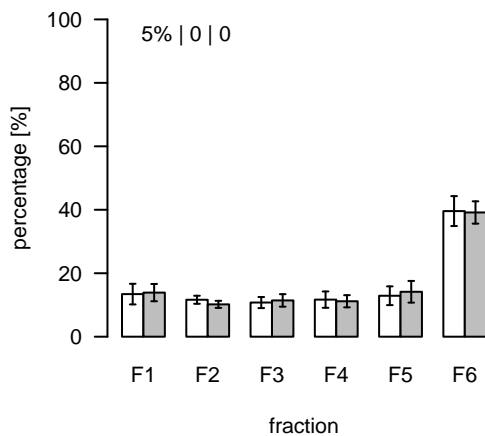

**L2491 (m/z=893.560641; rt=12.38896)**  
T/S Cluster: L-12.4-4

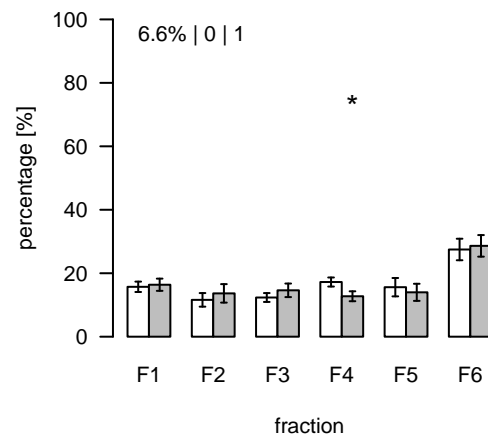

**L2489 (m/z=893.537005; rt=12.38802)**  
T/S Cluster: L-12.4-4

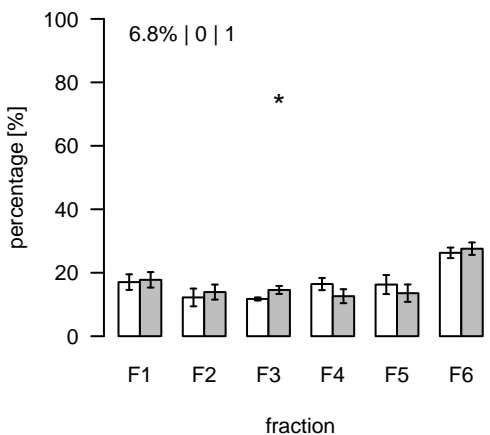

**L2490 (m/z=682.641117; rt=12.38875)**  
T/S Cluster: L-12.4-5

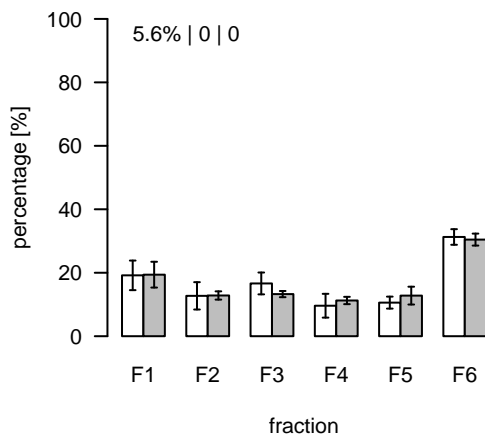

**L2492 (m/z=682.62611; rt=12.38932)**  
T/S Cluster: L-12.4-5

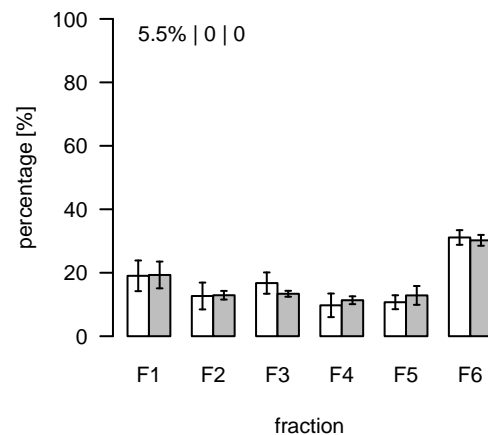

**L2493 (m/z=683.640331; rt=12.39029)**  
T/S Cluster: L-12.4-5

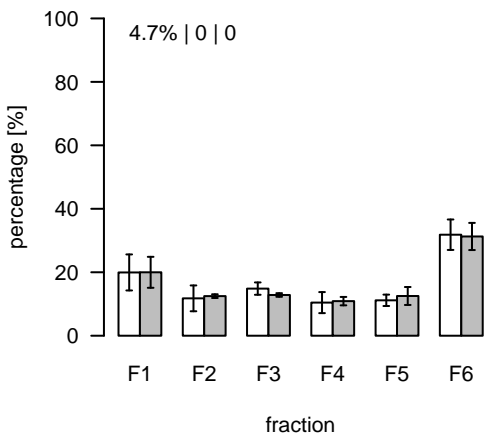

**L2496 (m/z=828.695897; rt=12.50723)**  
T/S Cluster: L-12.5-1

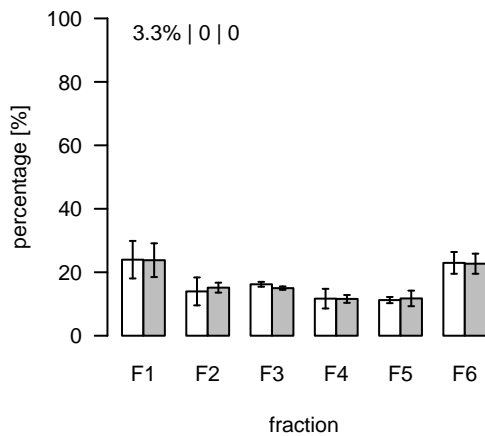

**L2497 (m/z=437.746443; rt=12.52308)**  
T/S Cluster: L-12.5-2

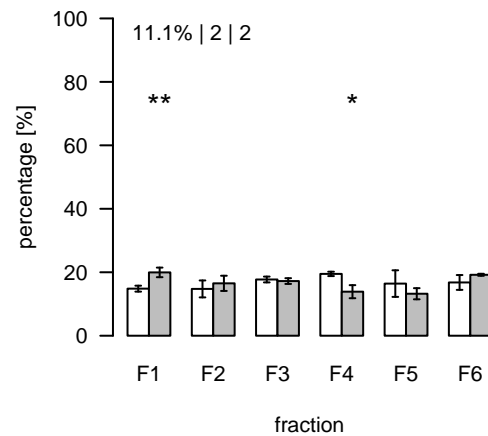

**L2500 (m/z=684.207611; rt=12.76659)**  
T/S Cluster: L-12.8-1

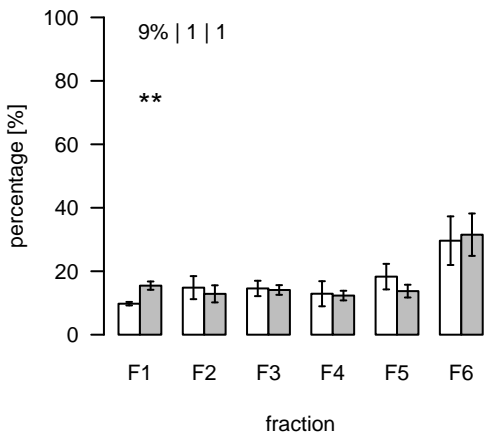

**L2504 (m/z=684.188612; rt=12.76663)**  
T/S Cluster: L-12.8-1

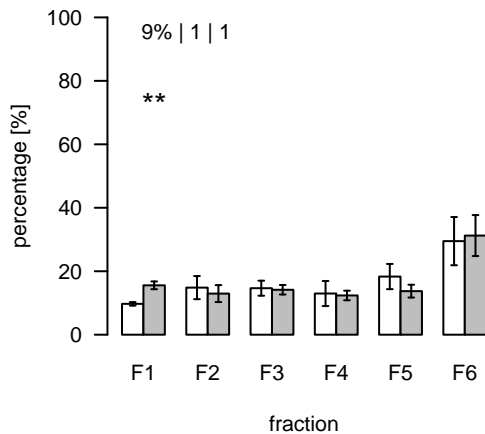

**L2501 (m/z=685.208026; rt=12.7666)**  
T/S Cluster: L-12.8-1

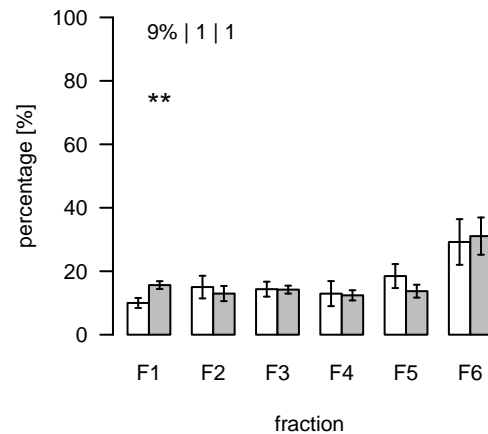

**L2503 (m/z=685.188831; rt=12.76662)**  
T/S Cluster: L-12.8-1

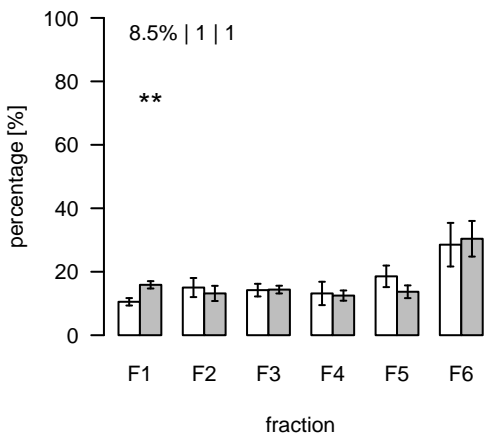

**L2499 (m/z=686.206737; rt=12.76649)**  
T/S Cluster: L-12.8-1

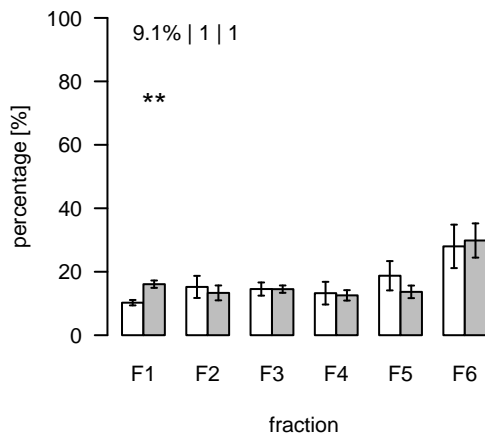

**L2502 (m/z=686.190628; rt=12.7666)**  
T/S Cluster: L-12.8-1

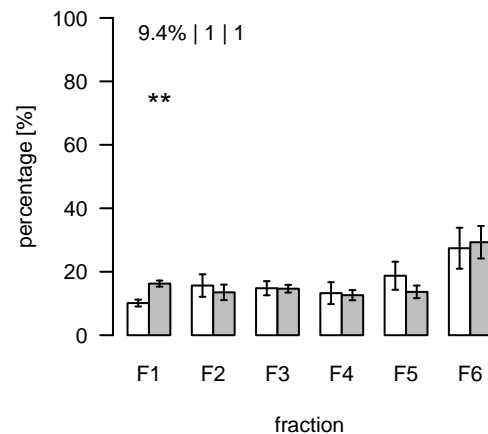

**L2505 (m/z=687.204644; rt=12.76693)**  
T/S Cluster: L-12.8-1

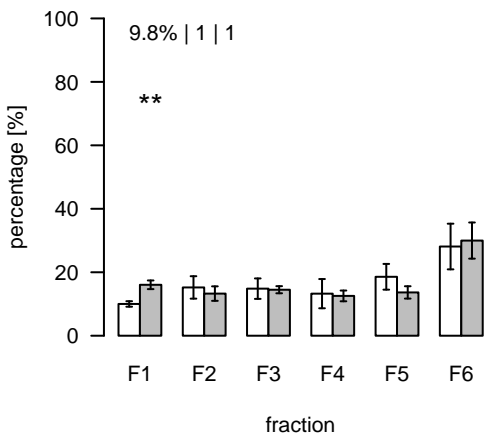

**L2498 (m/z=342.103516; rt=12.7659)**  
T/S Cluster: L-12.8-1

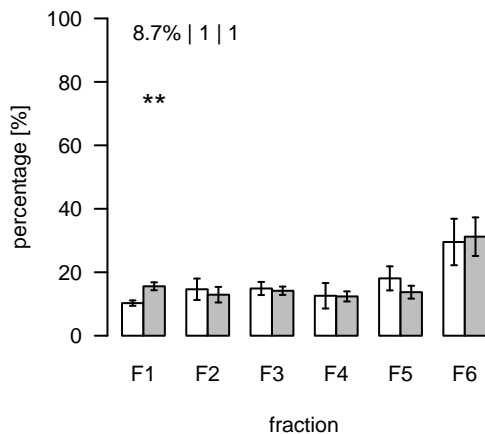

**L2509 (m/z=872.721942; rt=12.78801)**  
T/S Cluster: L-12.8-2

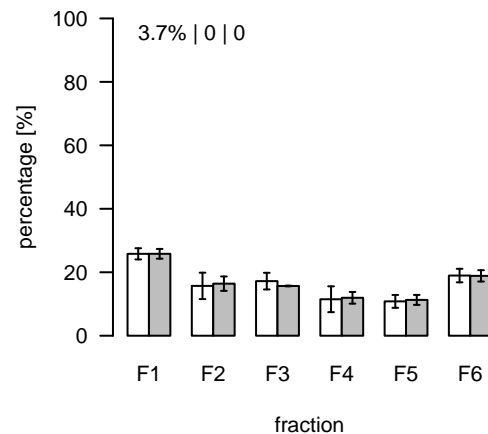

**L2506 (m/z=873.735267; rt=12.78788)**  
T/S Cluster: L-12.8-2

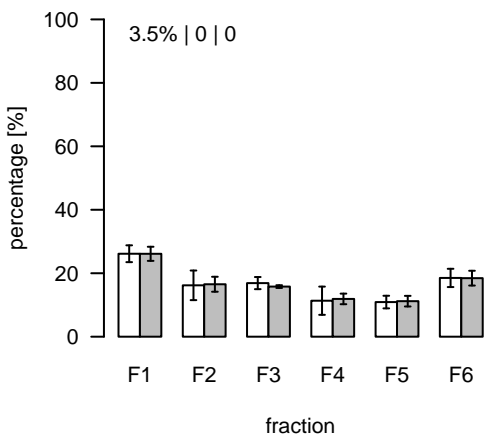

**L2507 (m/z=873.725424; rt=12.78793)**  
T/S Cluster: L-12.8-2

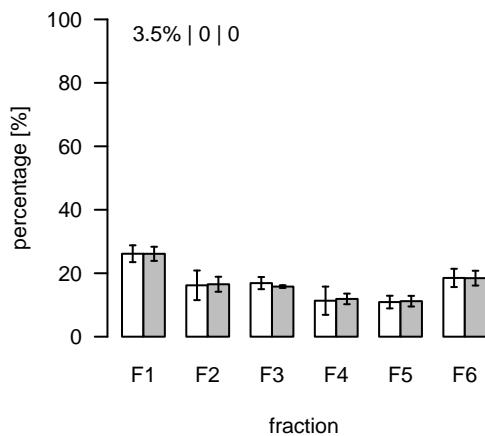

**L2508 (m/z=873.71141; rt=12.78799)**  
T/S Cluster: L-12.8-2

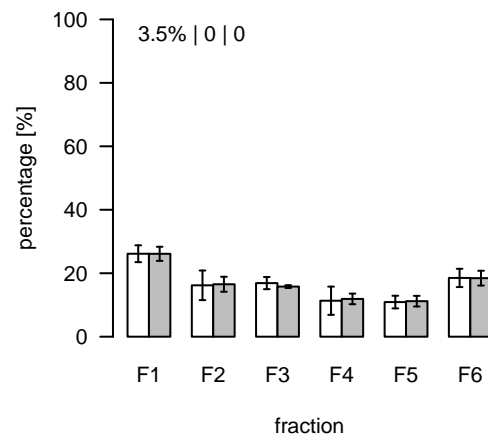

**L2511 (m/z=874.728608; rt=12.7885)**  
T/S Cluster: L-12.8-2

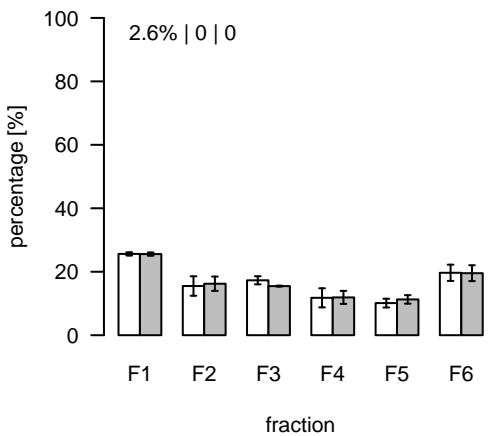

**L2510 (m/z=436.362316; rt=12.78826)**  
T/S Cluster: L-12.8-2

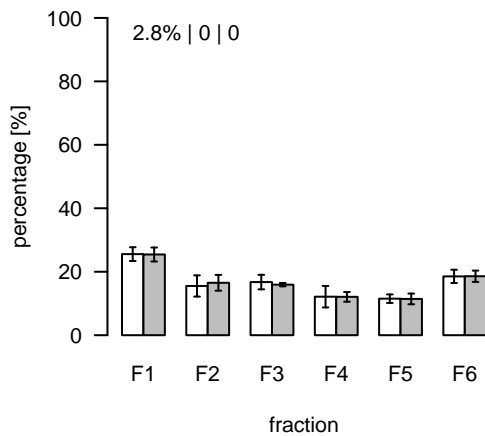

**L2512 (m/z=894.70347; rt=12.78985)**  
T/S Cluster: L-12.8-3

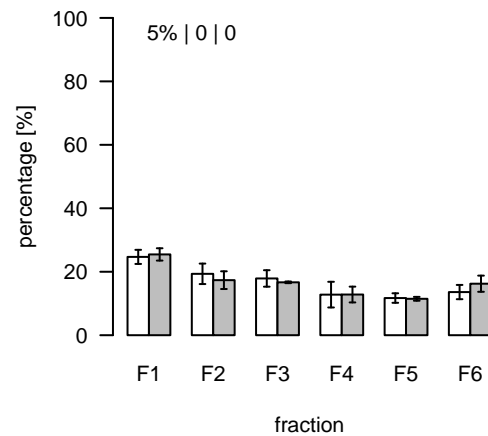

**L2513 (m/z=895.706831; rt=12.79005)**  
T/S Cluster: L-12.8-3

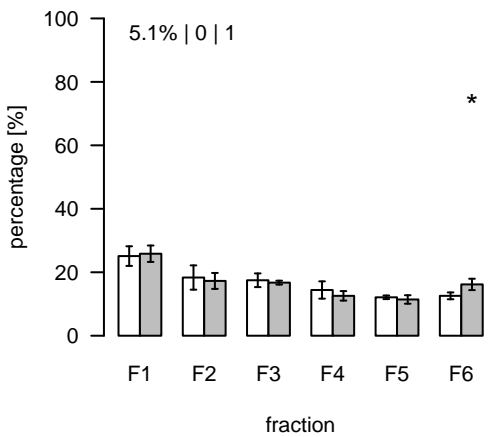

**L2514 (m/z=437.746816; rt=13.65571)**  
T/S Cluster: L-13.7-1

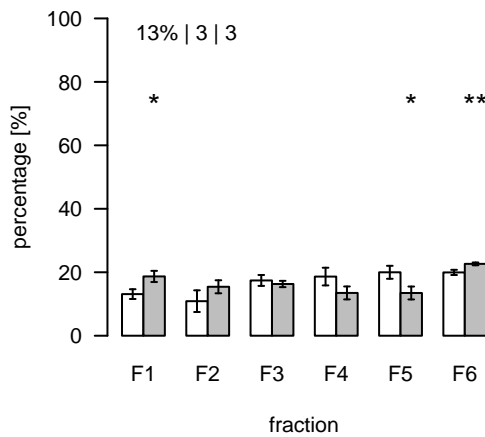

**L2516 (m/z=900.753482; rt=13.7002)**  
T/S Cluster: L-13.7-2

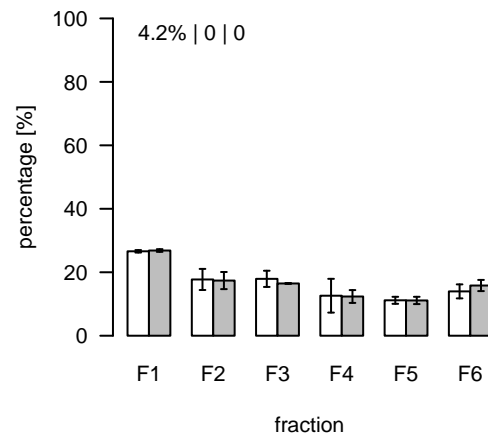

**L2517 (m/z=901.756297; rt=13.70076)**  
T/S Cluster: L-13.7-2

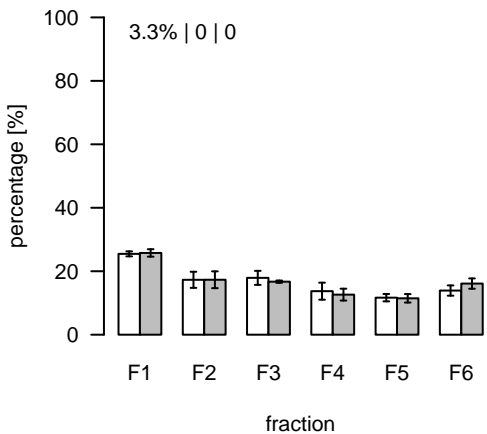

**L2515 (m/z=832.705531; rt=13.69529)**  
T/S Cluster: L-13.7-2

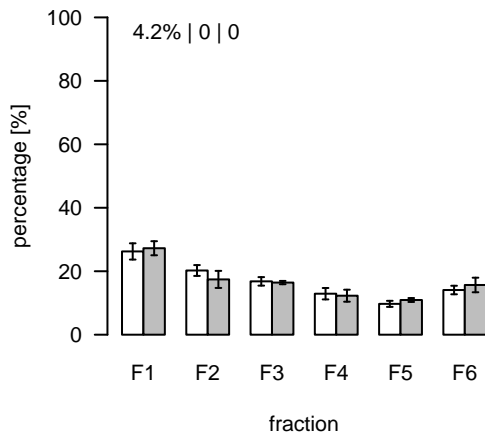

**L2523 (m/z=758.225413; rt=14.00396)**  
T/S Cluster: L-14-1

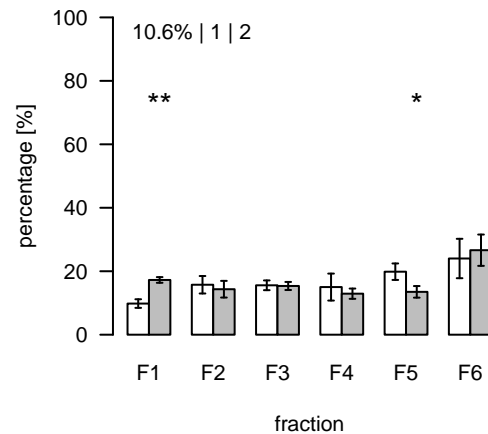

**L2520 (m/z=759.227015; rt=14.0039)**  
T/S Cluster: L-14-1

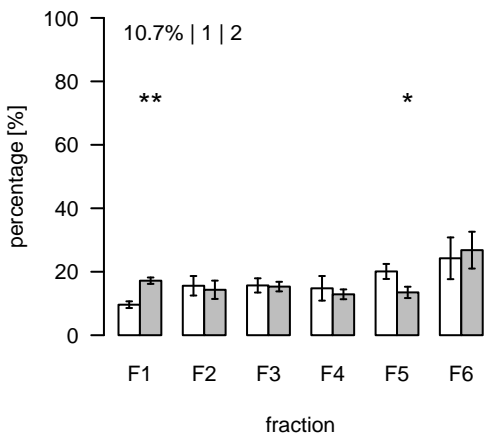

**L2522 (m/z=758.199033; rt=14.00395)**  
T/S Cluster: L-14-1

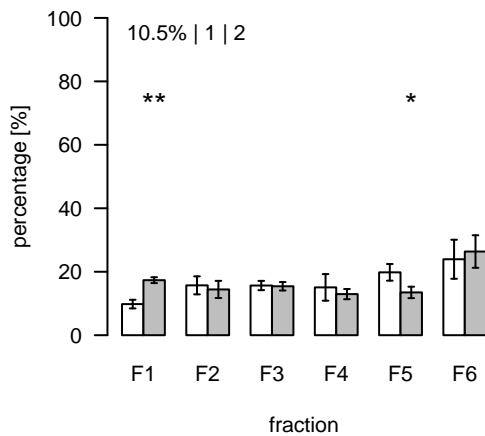

**L2529 (m/z=760.227771; rt=14.00421)**  
T/S Cluster: L-14-1

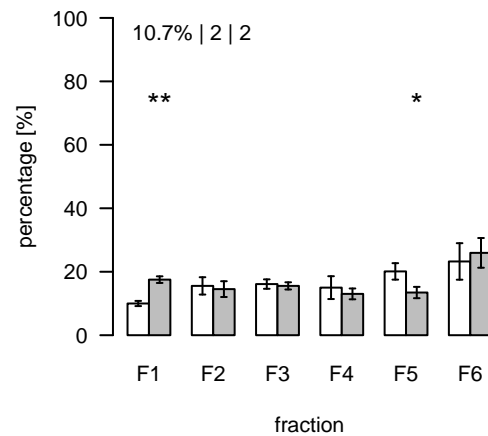

**L2521 (m/z=759.202655; rt=14.00394)**  
T/S Cluster: L-14-1

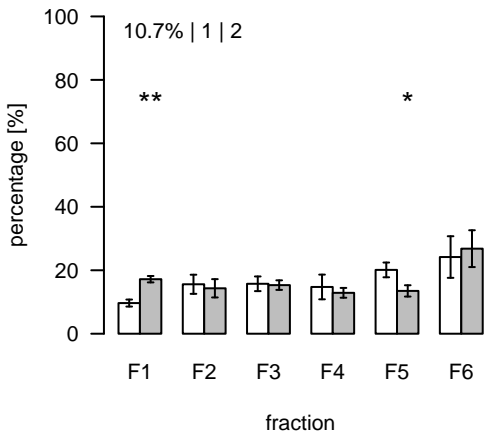

**L2528 (m/z=760.207673; rt=14.00417)**  
T/S Cluster: L-14-1

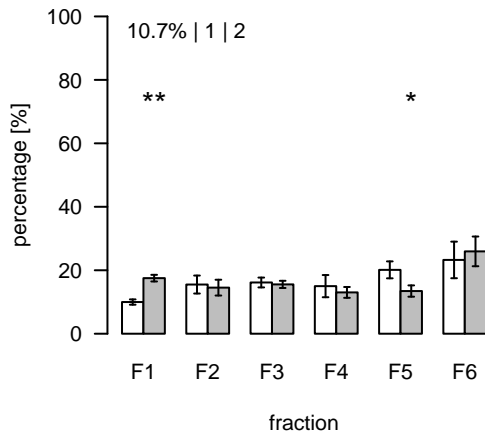

**L2526 (m/z=761.232285; rt=14.00406)**  
T/S Cluster: L-14-1

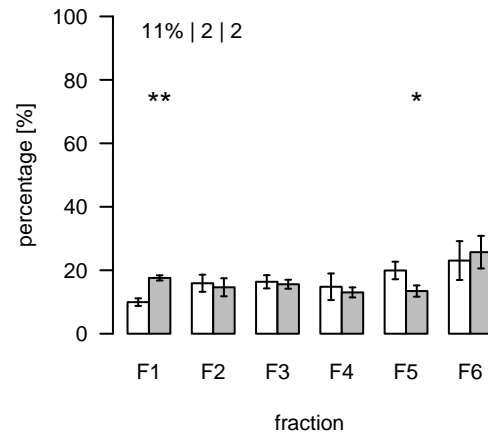

**L2527 (m/z=761.213707; rt=14.00409)**  
T/S Cluster: L-14-1

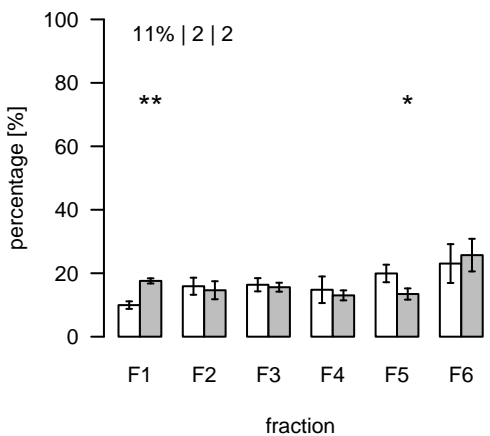

**L2525 (m/z=762.222238; rt=14.00405)**  
T/S Cluster: L-14-1

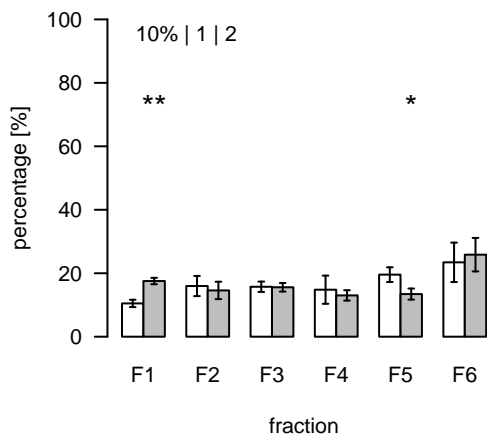

**L2524 (m/z=379.113243; rt=14.004)**  
T/S Cluster: L-14-1

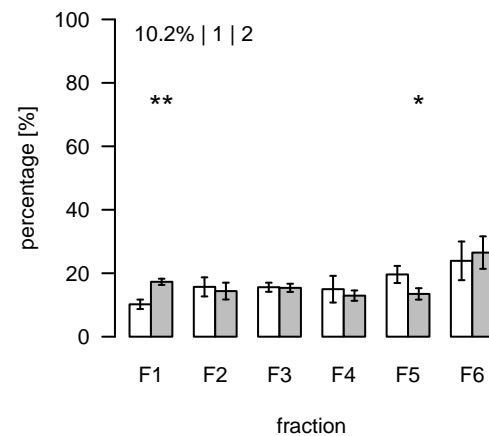

**L2519 (m/z=379.613469; rt=14.00343)**  
T/S Cluster: L-14-1

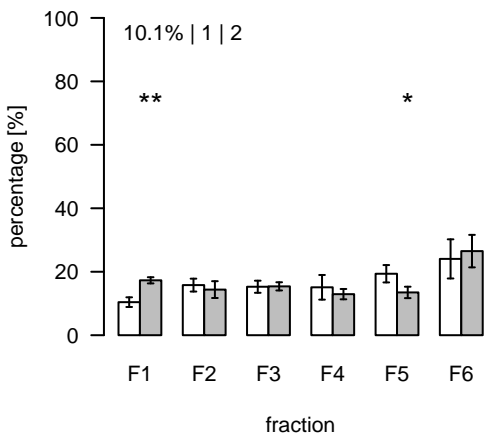

**L2518 (m/z=380.112362; rt=14.00327)**  
T/S Cluster: L-14-1

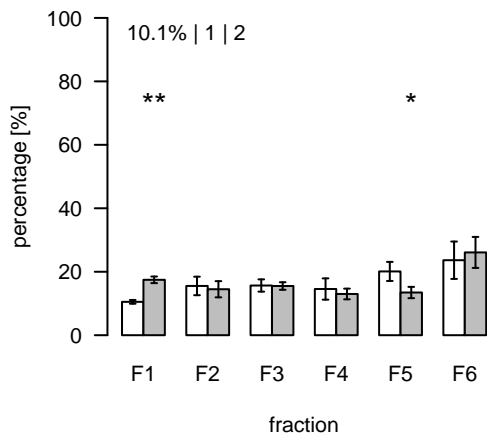

**L2530 (m/z=761.224584; rt=14.06408)**  
T/S Cluster: L-14.1-1

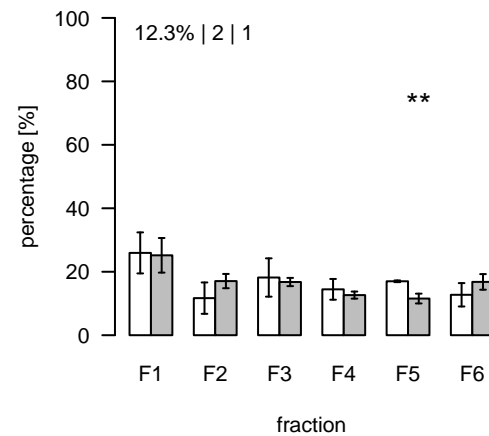

**L2531 (m/z=758.224534; rt=14.0651)**  
T/S Cluster: L-14.1-2

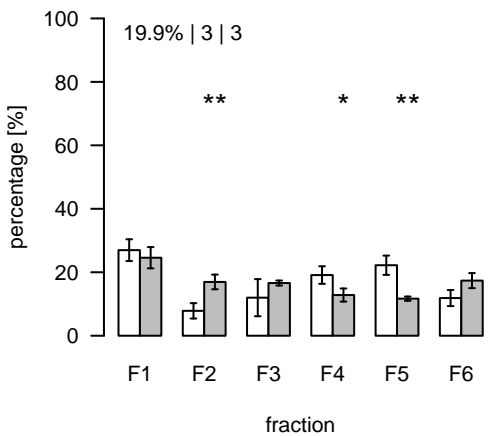

**L2533 (m/z=759.225504; rt=14.06581)**  
T/S Cluster: L-14.1-2

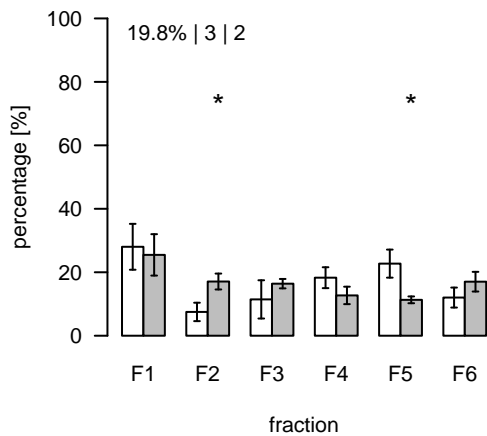

**L2532 (m/z=760.225729; rt=14.06552)**  
T/S Cluster: L-14.1-2

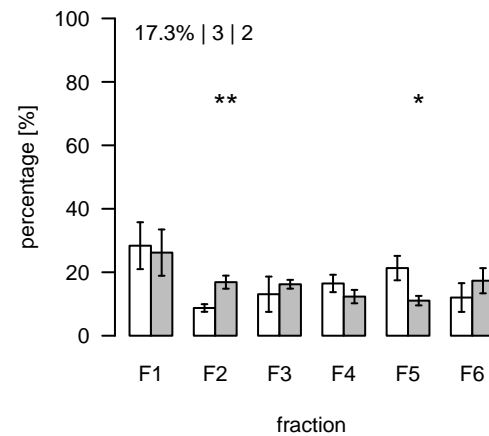



**L2534 (m/z=812.65814; rt=14.11528)**  
T/S Cluster: L-14.1-3

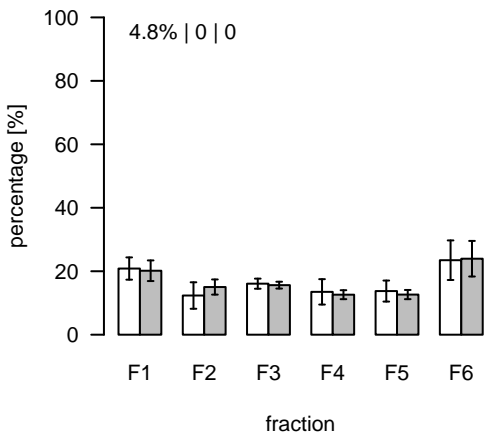

**L2536 (m/z=698.257822; rt=14.29215)**  
T/S Cluster: L-14.3-1

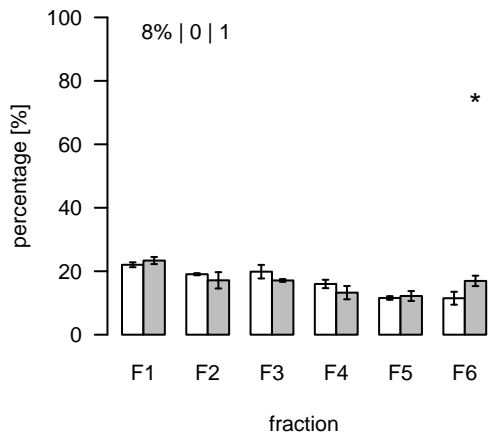

**L2535 (m/z=699.258844; rt=14.2907)**  
T/S Cluster: L-14.3-1

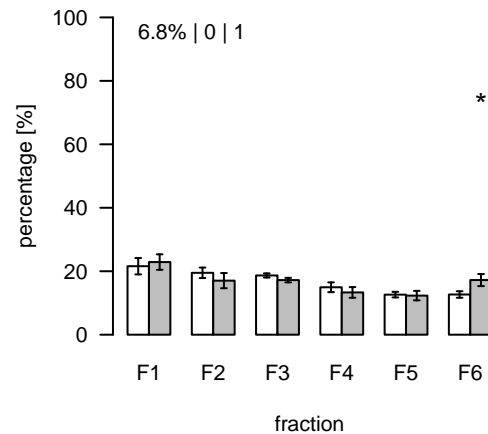

**L2537 (m/z=437.749743; rt=14.61481)**  
T/S Cluster: L-14.6-1

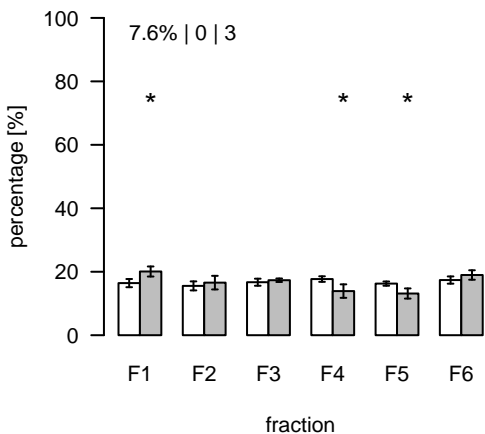

**L2545 (m/z=832.245444; rt=14.79763)**  
T/S Cluster: L-14.8-1

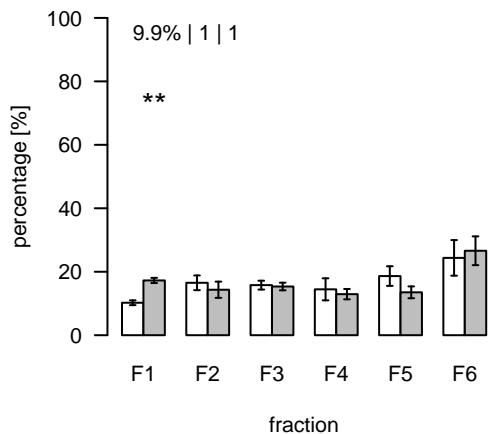

**L2543 (m/z=833.247558; rt=14.79759)**  
T/S Cluster: L-14.8-1

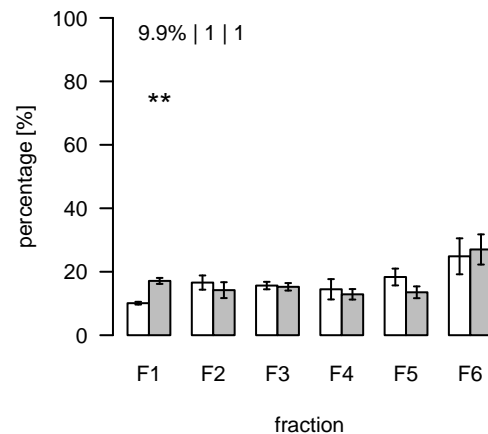

**L2546 (m/z=832.215688; rt=14.79764)**  
T/S Cluster: L-14.8-1

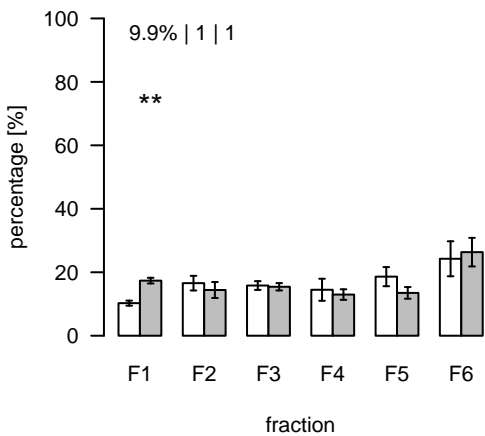

**L2544 (m/z=833.222129; rt=14.7976)**  
T/S Cluster: L-14.8-1

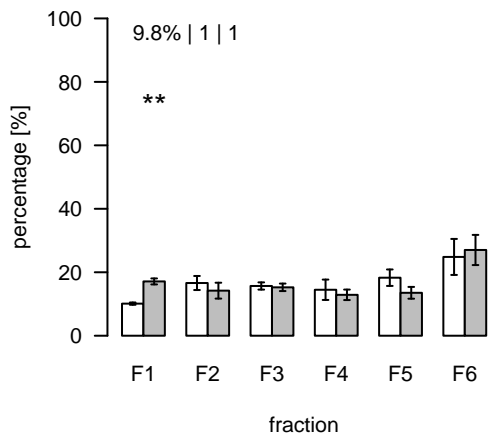

**L2542 (m/z=834.245074; rt=14.79748)**  
T/S Cluster: L-14.8-1

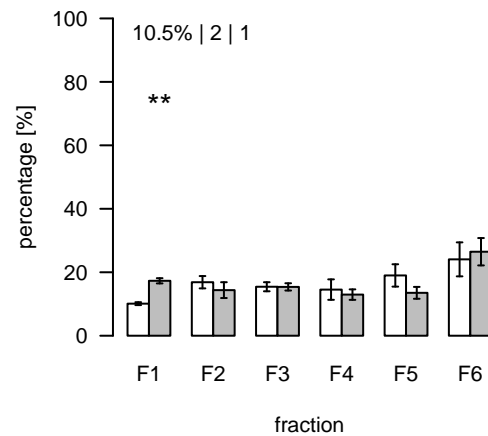

**L2547 (m/z=834.216779; rt=14.79768)**  
T/S Cluster: L-14.8-1

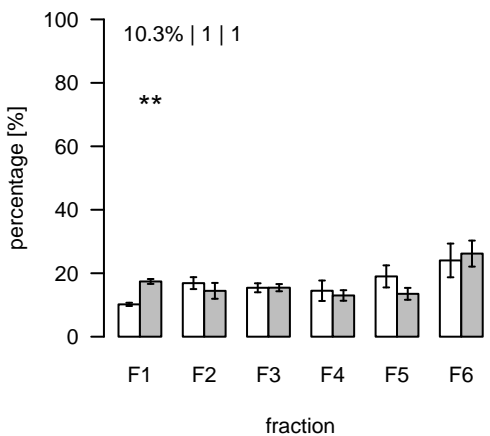

**L2548 (m/z=835.249403; rt=14.79769)**  
T/S Cluster: L-14.8-1

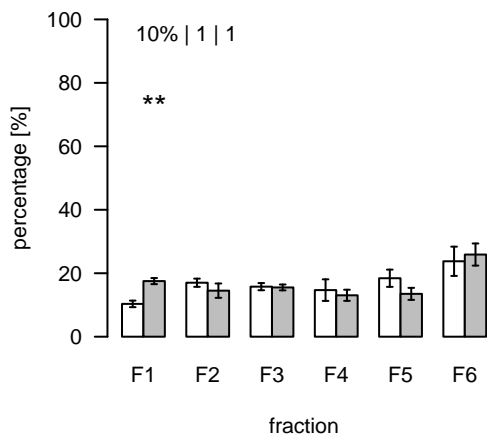

**L2549 (m/z=835.225941; rt=14.79777)**  
T/S Cluster: L-14.8-1

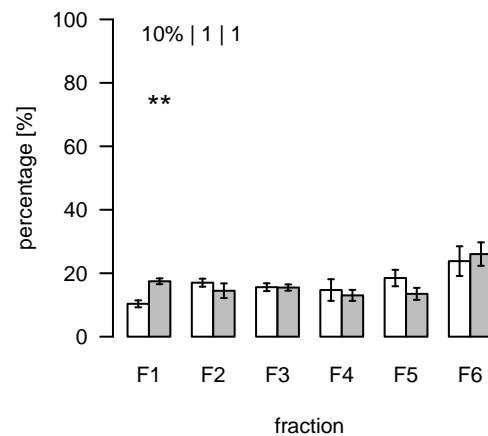

**L2550 (m/z=836.241445; rt=14.7978)**  
T/S Cluster: L-14.8-1

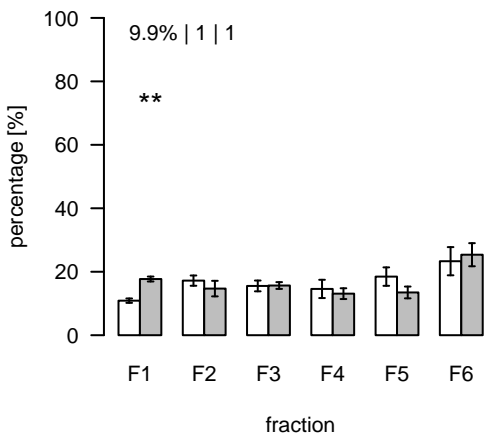

**L2541 (m/z=416.122983; rt=14.79698)**  
T/S Cluster: L-14.8-1

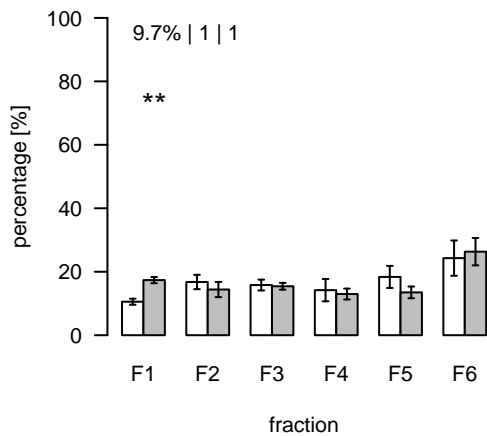

**L2540 (m/z=416.623225; rt=14.79679)**  
T/S Cluster: L-14.8-1

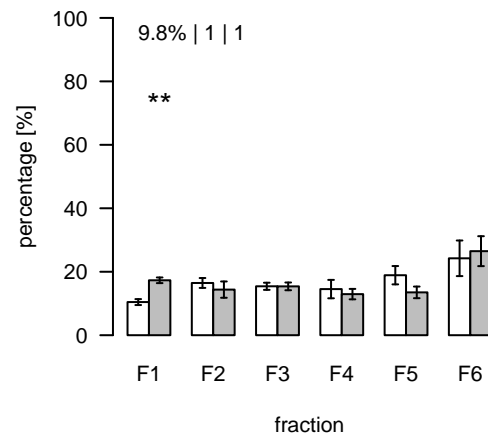

**L2538 (m/z=837.240703; rt=14.79571)**  
T/S Cluster: L-14.8-1

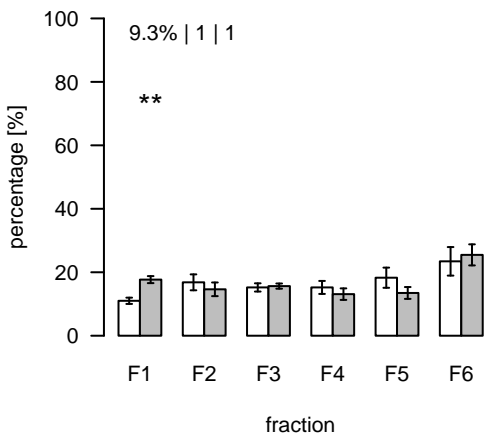

**L2539 (m/z=417.122289; rt=14.79651)**  
T/S Cluster: L-14.8-1

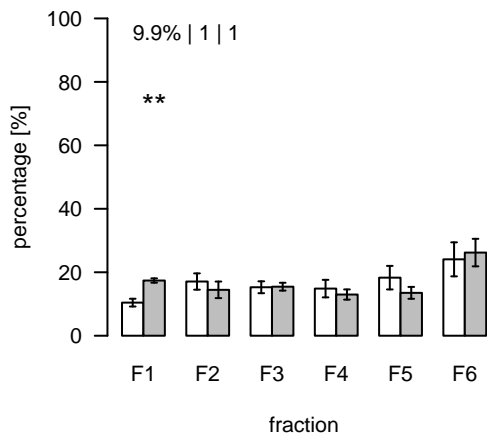

**L2552 (m/z=766.694587; rt=14.91008)**  
T/S Cluster: L-14.9-1

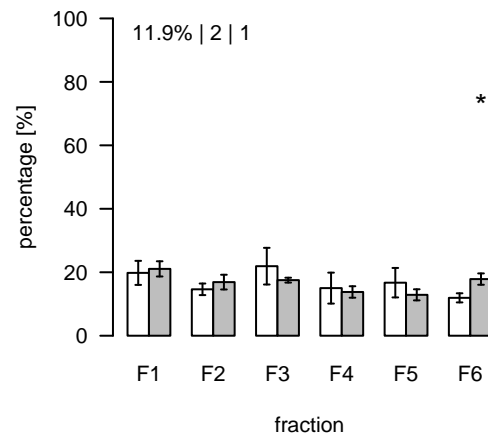

**L2551 (m/z=740.679395; rt=14.88069)**  
T/S Cluster: L-14.9-1

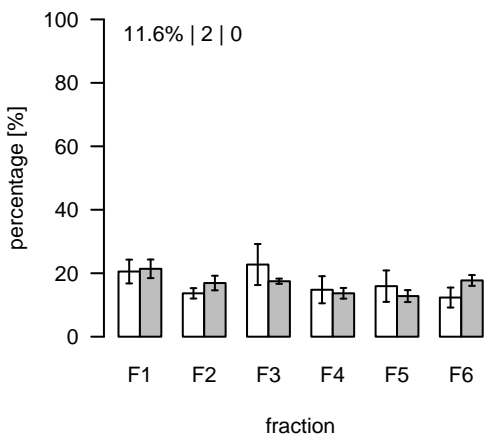

**L2555 (m/z=772.265641; rt=14.97184)**  
T/S Cluster: L-15-1

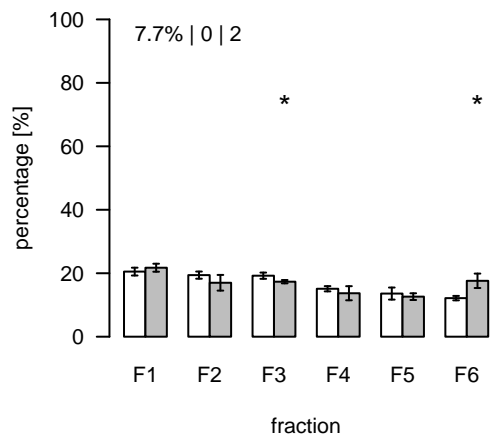

**L2556 (m/z=772.284587; rt=14.97187)**  
T/S Cluster: L-15-1

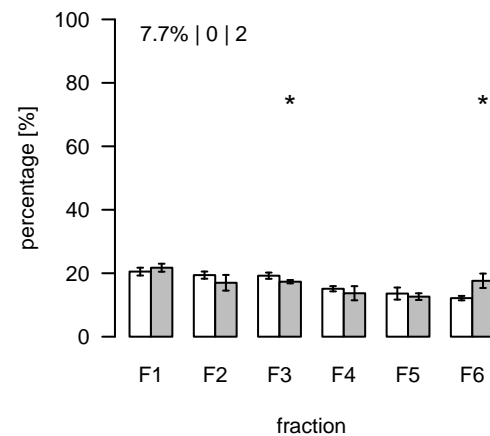

**L2557 (m/z=774.276005; rt=14.97215)**  
T/S Cluster: L-15-1

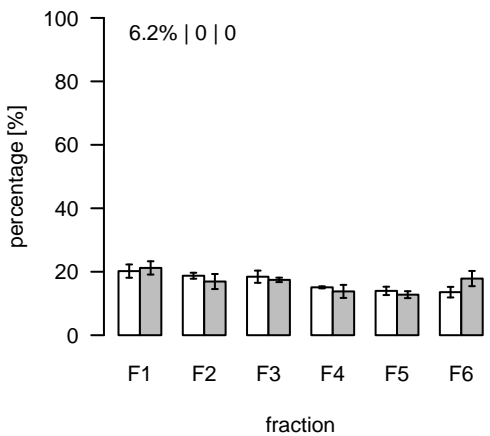

**L2553 (m/z=775.275836; rt=14.97086)**  
T/S Cluster: L-15-1

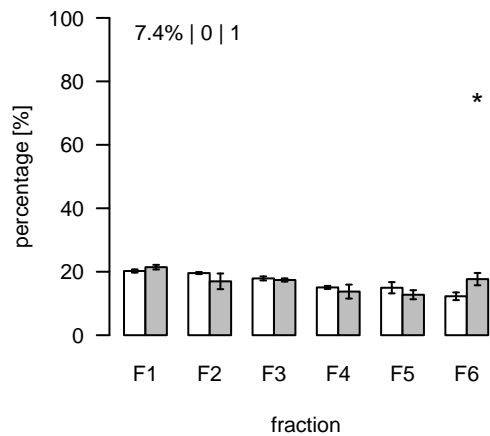

**L2554 (m/z=773.278036; rt=14.97173)**  
T/S Cluster: L-15-1

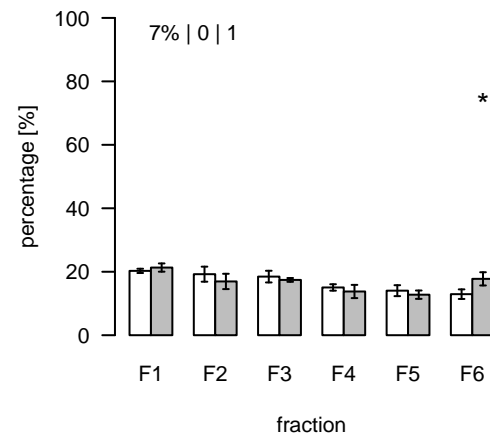

**L2558 (m/z=792.711144; rt=14.97222)**  
T/S Cluster: L-15-2

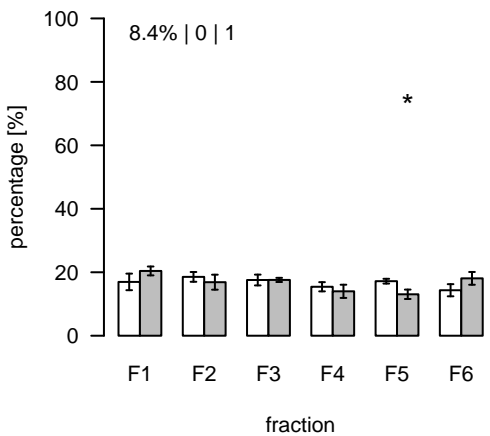

**L2559 (m/z=780.710167; rt=15.10688)**  
T/S Cluster: L-15.1-1

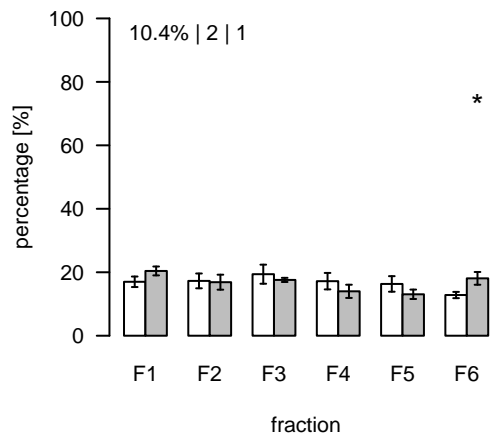

**L2560 (m/z=806.726142; rt=15.17061)**  
T/S Cluster: L-15.2-1

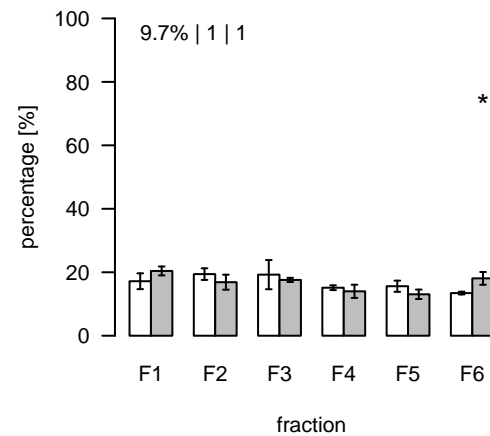

**L2561 (m/z=768.710425; rt=15.24836)**  
T/S Cluster: L-15.2-2

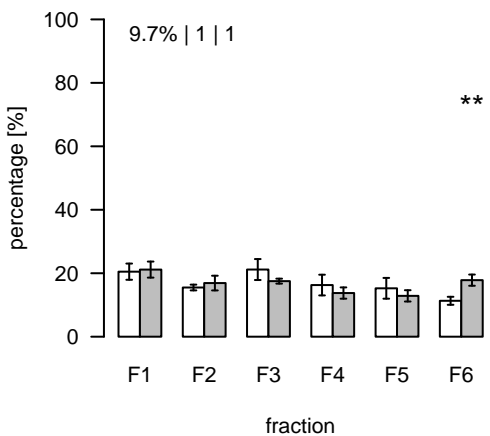

**L2562 (m/z=769.713692; rt=15.24951)**  
T/S Cluster: L-15.2-2

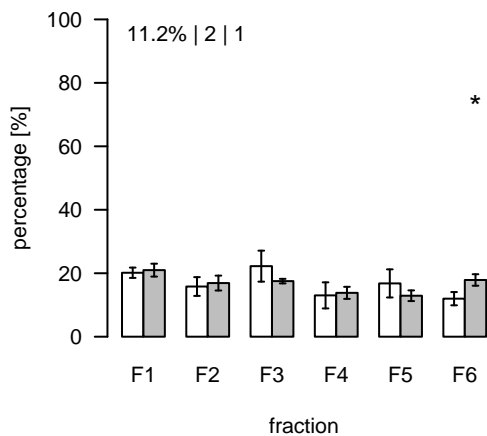

**L2564 (m/z=794.726316; rt=15.27554)**  
T/S Cluster: L-15.3-1

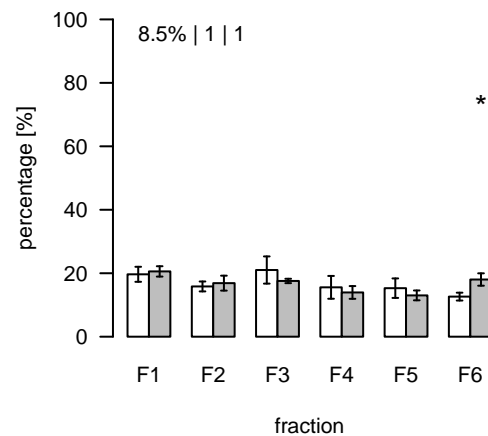

**L2563 (m/z=795.729658; rt=15.27462)**  
T/S Cluster: L-15.3-1

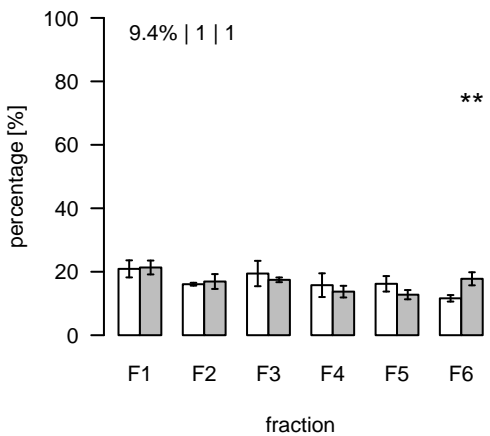

**L2565 (m/z=872.774212; rt=15.32187)**  
T/S Cluster: L-15.3-2

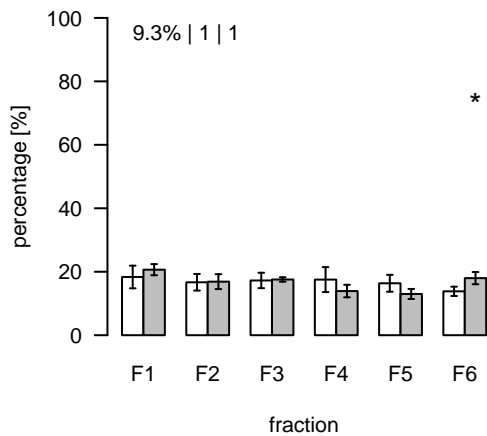

**L2566 (m/z=820.742633; rt=15.32261)**  
T/S Cluster: L-15.3-3

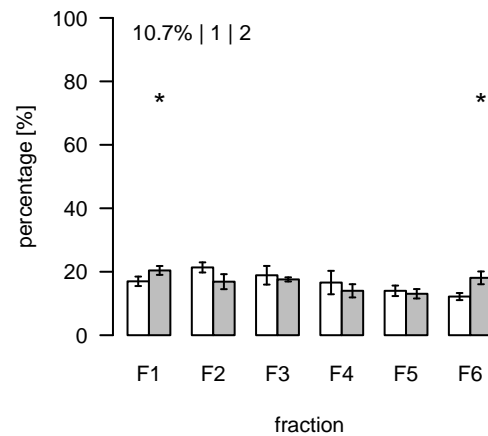

**L2567 (m/z=821.745666; rt=15.32287)**  
T/S Cluster: L-15.3-3

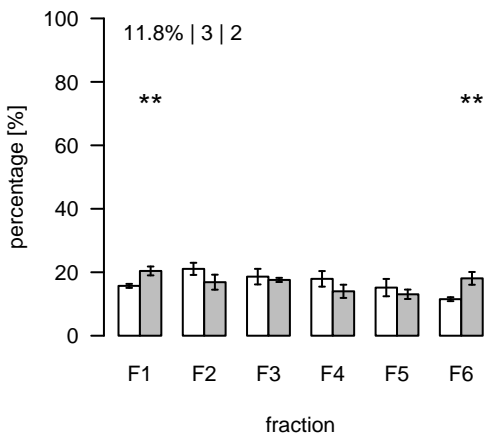

**L2568 (m/z=898.788584; rt=15.33191)**  
T/S Cluster: L-15.3-4

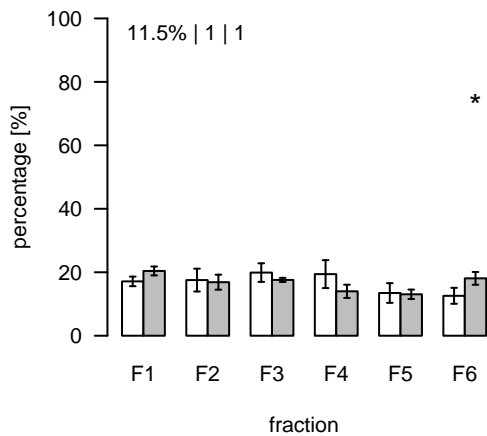

**L2569 (m/z=846.757993; rt=15.36216)**  
T/S Cluster: L-15.4-1

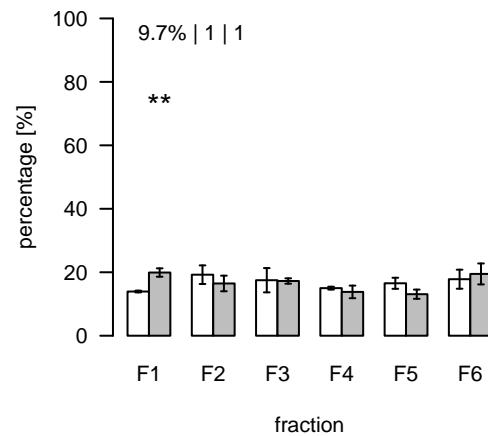

**L2570 (m/z=847.76096; rt=15.36221)**  
T/S Cluster: L-15.4-2

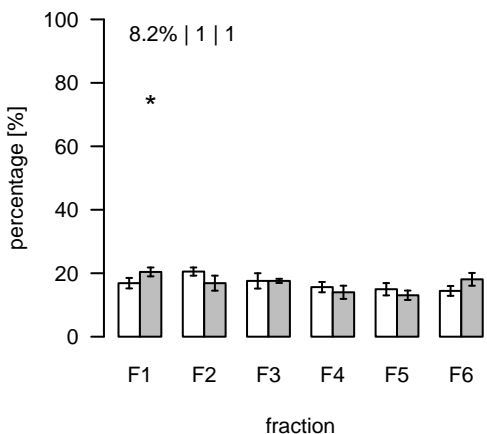

**L2581 (m/z=906.265337; rt=15.36526)**  
T/S Cluster: L-15.4-3

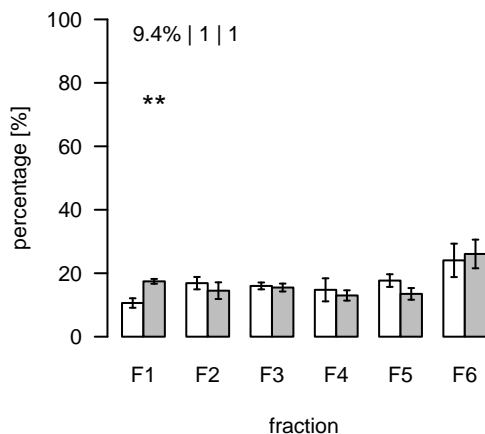

**L2583 (m/z=907.265144; rt=15.36545)**  
T/S Cluster: L-15.4-3

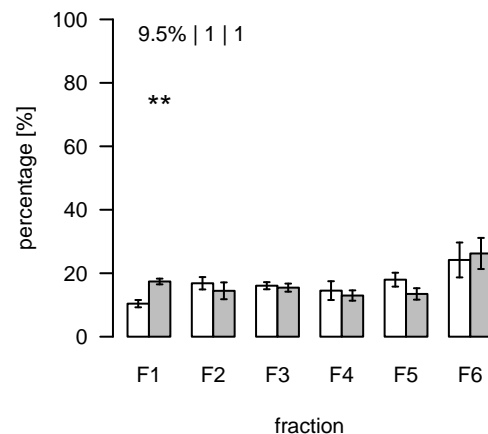

**L2579 (m/z=906.231112; rt=15.36524)**  
T/S Cluster: L-15.4-3

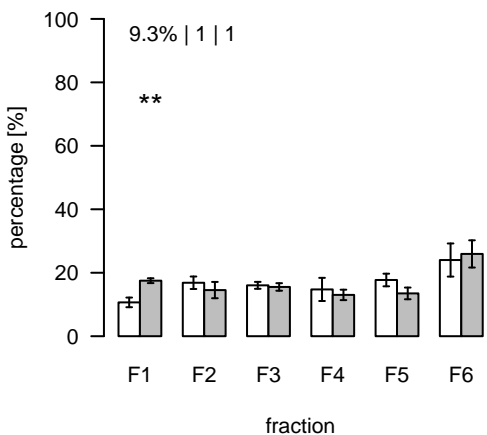

**L2584 (m/z=908.263683; rt=15.36545)**  
T/S Cluster: L-15.4-3

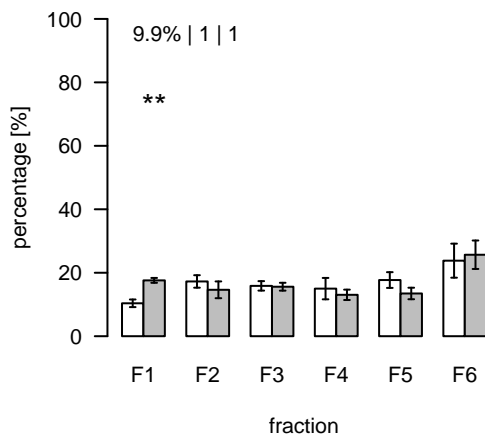

**L2586 (m/z=907.227608; rt=15.36564)**  
T/S Cluster: L-15.4-3

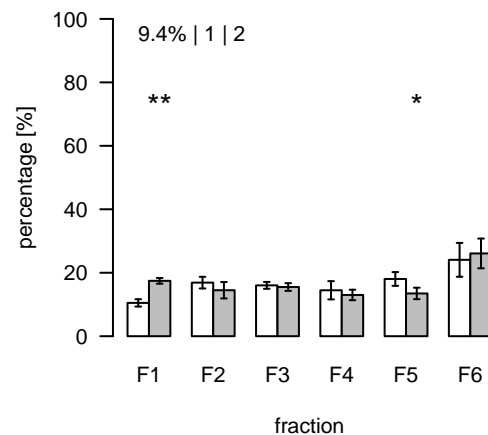

**L2585 (m/z=908.225764; rt=15.3655)**  
T/S Cluster: L-15.4-3

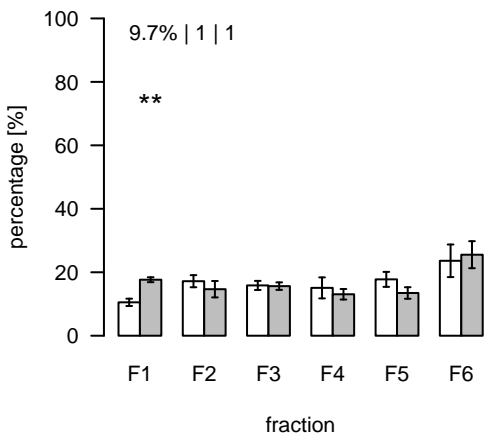

**L2580 (m/z=909.269026; rt=15.36525)**  
T/S Cluster: L-15.4-3

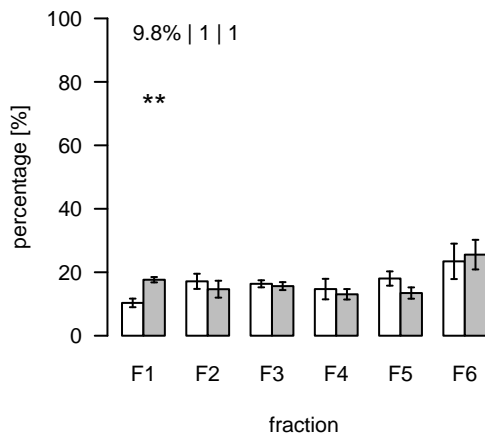

**L2582 (m/z=909.241436; rt=15.36536)**  
T/S Cluster: L-15.4-3

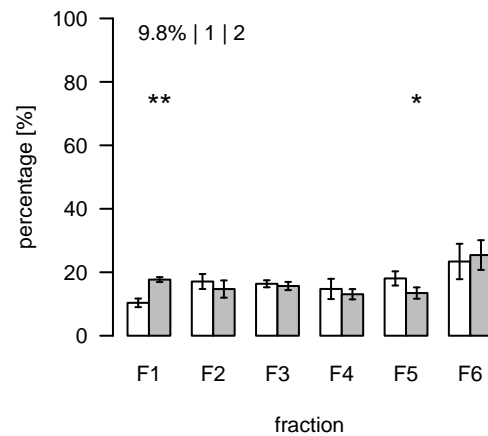

**L2587 (m/z=910.260951; rt=15.36564)**  
T/S Cluster: L-15.4-3

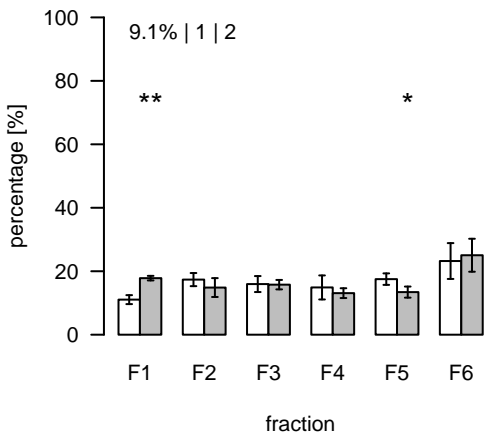

**L2577 (m/z=453.130129; rt=15.36479)**  
T/S Cluster: L-15.4-3

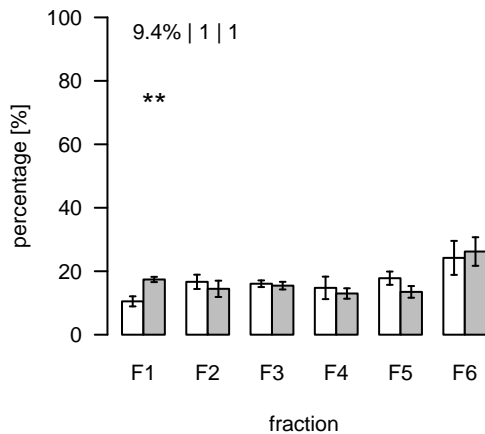

**L2576 (m/z=453.137476; rt=15.36476)**  
T/S Cluster: L-15.4-3

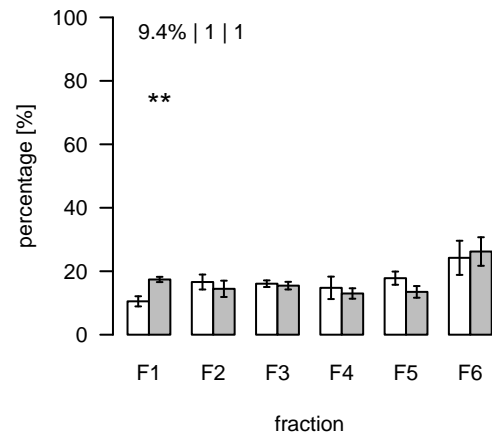

**L2575 (m/z=911.259746; rt=15.36475)**  
T/S Cluster: L-15.4-3

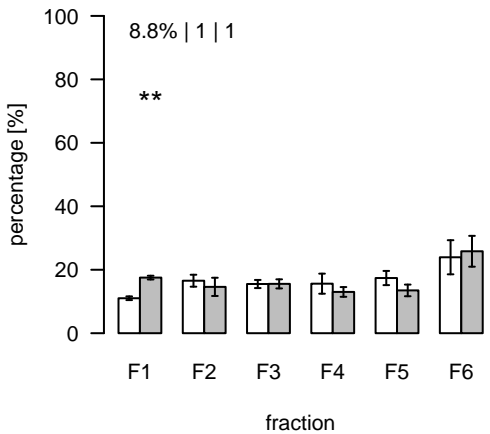

**L2574 (m/z=453.633135; rt=15.36469)**  
T/S Cluster: L-15.4-3

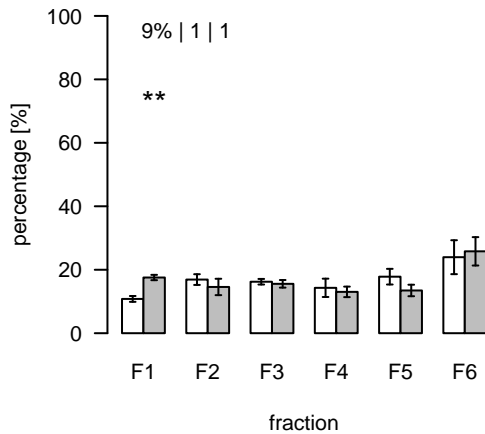

**L2573 (m/z=454.132165; rt=15.36452)**  
T/S Cluster: L-15.4-3

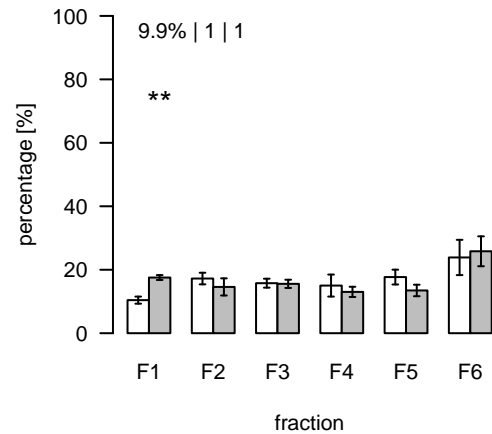

**L2578 (m/z=948.289105; rt=15.36497)**  
T/S Cluster: L-15.4-3

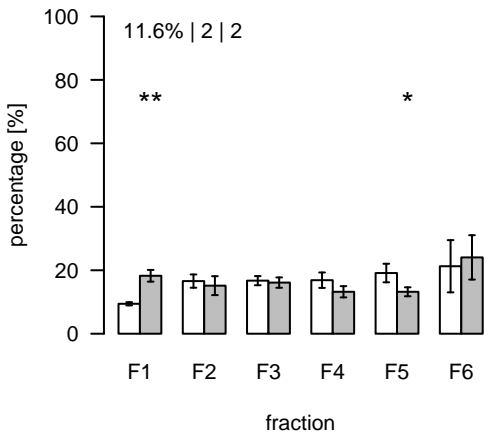

**L2572 (m/z=949.288889; rt=15.36437)**  
T/S Cluster: L-15.4-3

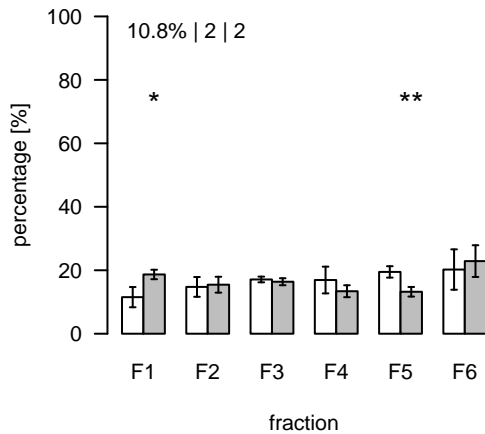

**L2571 (m/z=454.63218; rt=15.36365)**  
T/S Cluster: L-15.4-3

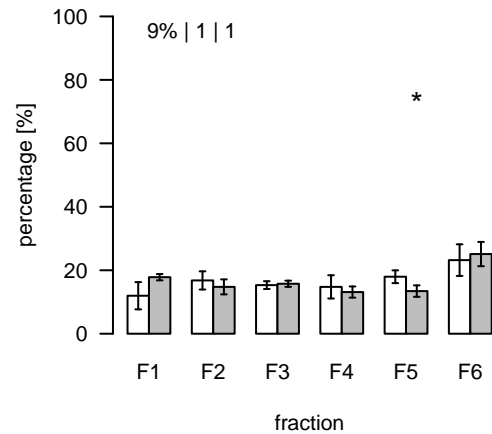

**L2589 (m/z=808.741943; rt=15.43141)**  
T/S Cluster: L-15.4-4

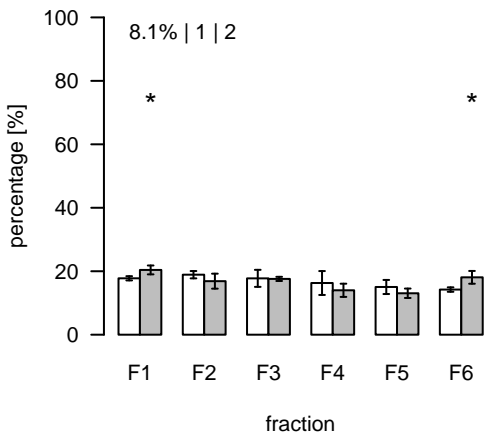

**L2588 (m/z=782.725977; rt=15.38703)**  
T/S Cluster: L-15.4-4

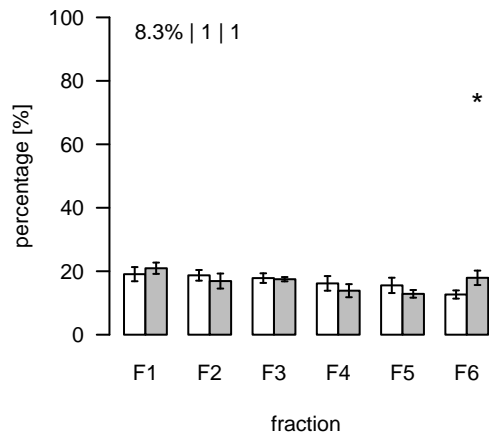

**L2590 (m/z=809.745283; rt=15.43256)**  
T/S Cluster: L-15.4-4

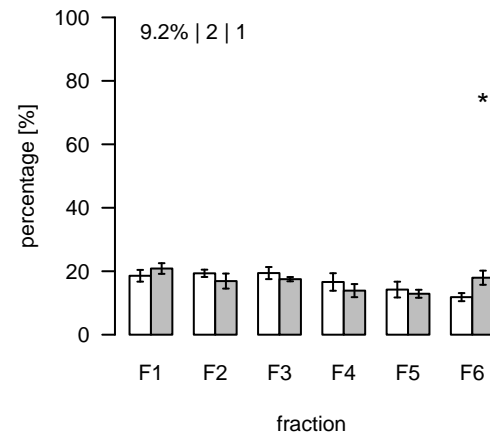

**L2597 (m/z=848.295357; rt=15.46722)**  
T/S Cluster: L-15.5-1

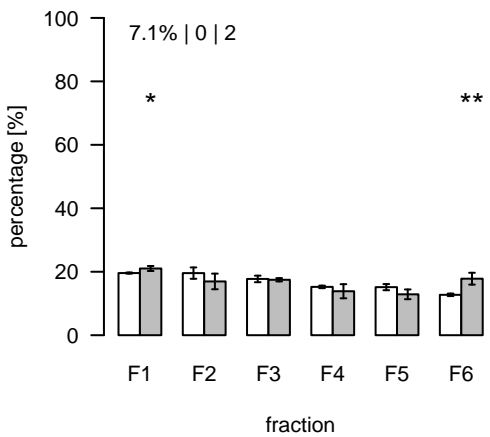

**L2594 (m/z=846.306858; rt=15.46717)**  
T/S Cluster: L-15.5-1

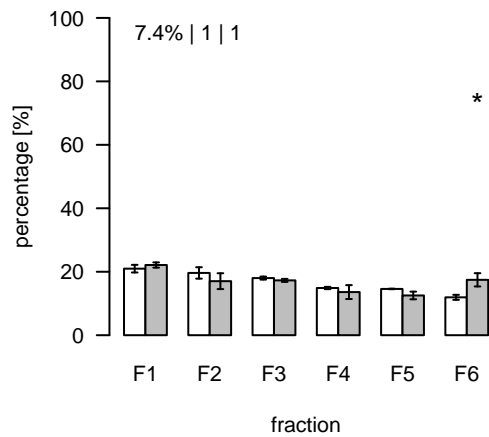

**L2595 (m/z=846.284421; rt=15.46717)**  
T/S Cluster: L-15.5-1

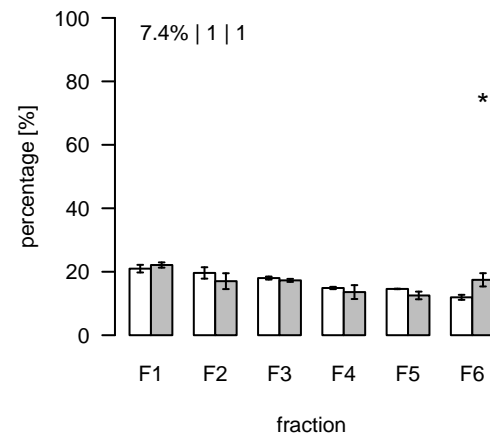

**L2596 (m/z=847.297132; rt=15.46721)**  
T/S Cluster: L-15.5-1

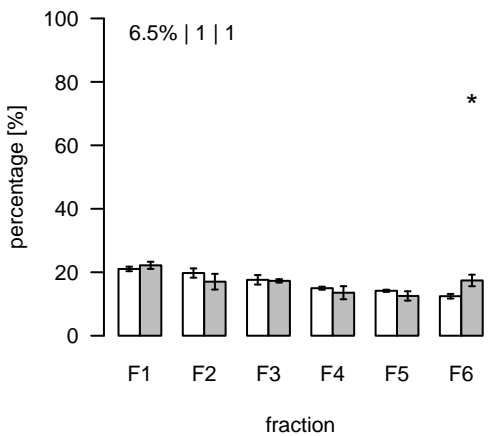

**L2593 (m/z=849.294781; rt=15.46683)**  
T/S Cluster: L-15.5-1

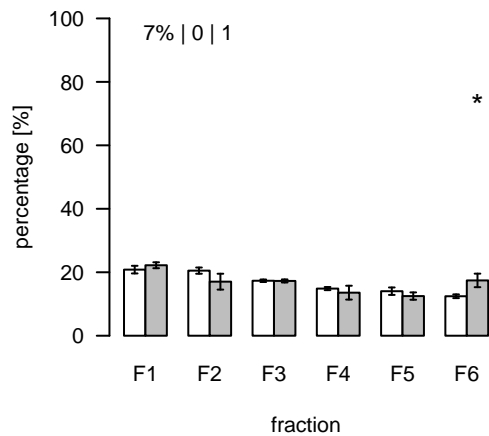

**L2592 (m/z=850.294352; rt=15.46506)**  
T/S Cluster: L-15.5-1

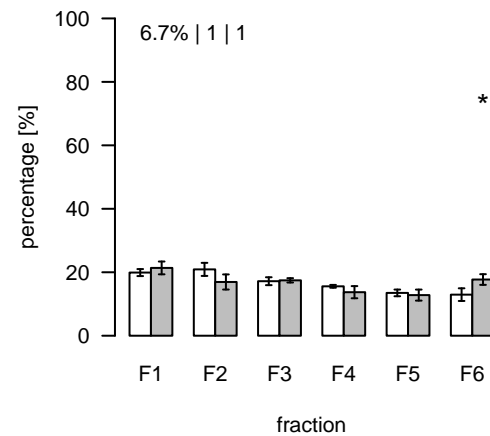

**L2591 (m/z=423.149549; rt=15.46449)**  
T/S Cluster: L-15.5-1

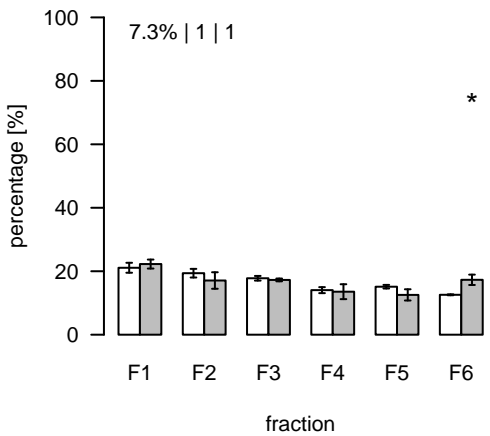

**L2598 (m/z=834.757469; rt=15.47111)**  
T/S Cluster: L-15.5-2

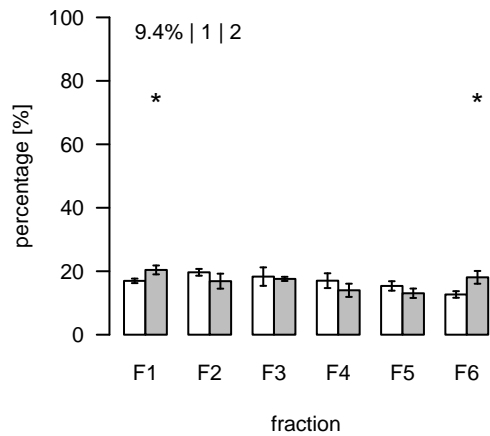

**L2599 (m/z=835.76125; rt=15.47115)**  
T/S Cluster: L-15.5-2

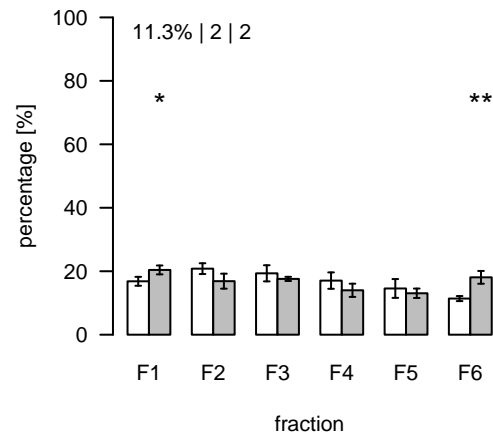

**L2600 (m/z=860.77283; rt=15.50471)**  
T/S Cluster: L-15.5-2

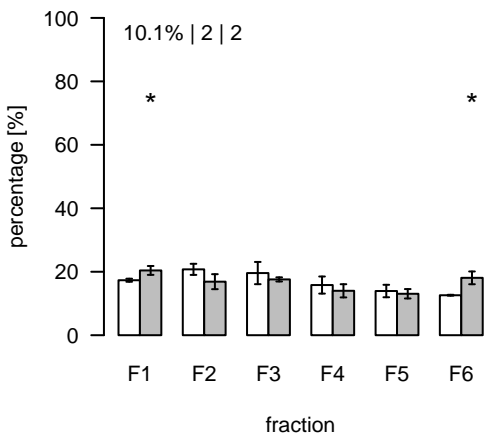

**L2604 (m/z=822.758106; rt=15.57404)**  
T/S Cluster: L-15.6-1

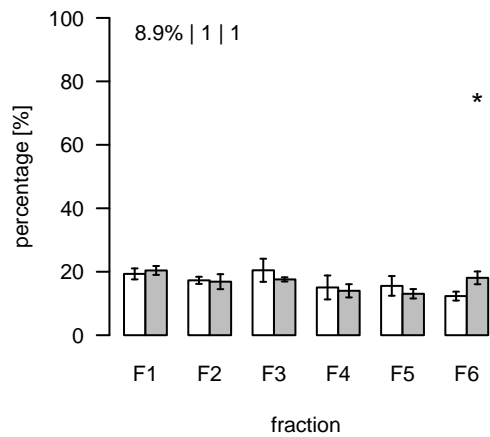

**L2601 (m/z=796.742038; rt=15.55342)**  
T/S Cluster: L-15.6-1

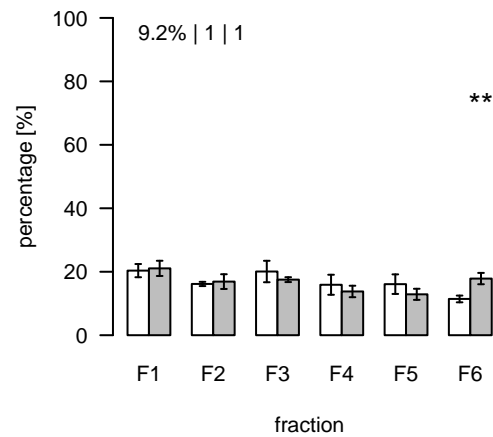

**L2614 (m/z=848.774336; rt=15.5925)**  
T/S Cluster: L-15.6-1

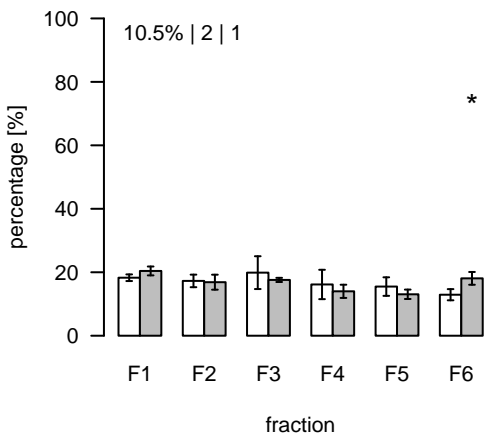

**L2615 (m/z=849.777277; rt=15.59299)**  
T/S Cluster: L-15.6-1

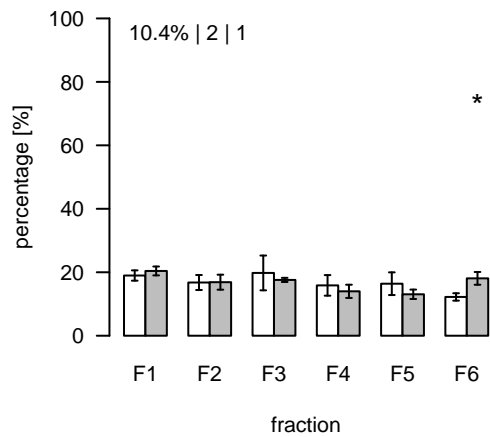

**L2602 (m/z=797.74569; rt=15.55463)**  
T/S Cluster: L-15.6-1

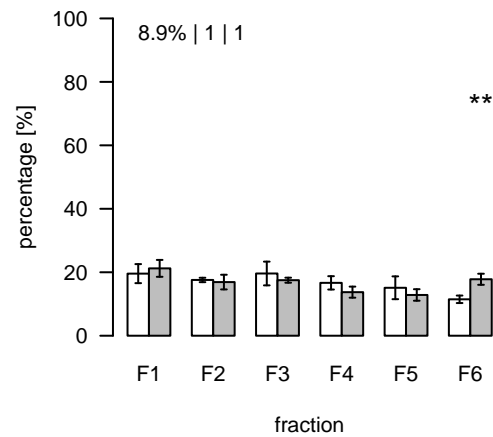



**L2617 (m/z=874.789437; rt=15.59536)**  
T/S Cluster: L-15.6-1

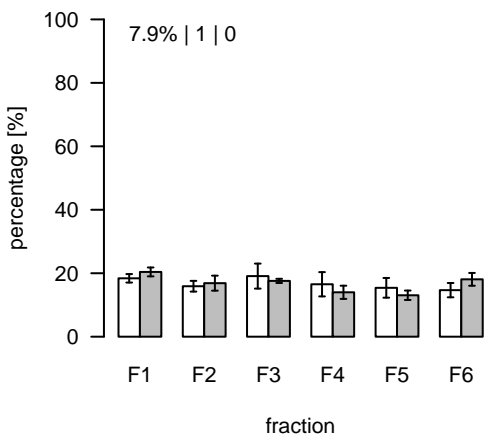

**L2606 (m/z=850.790295; rt=15.58084)**  
T/S Cluster: L-15.6-1

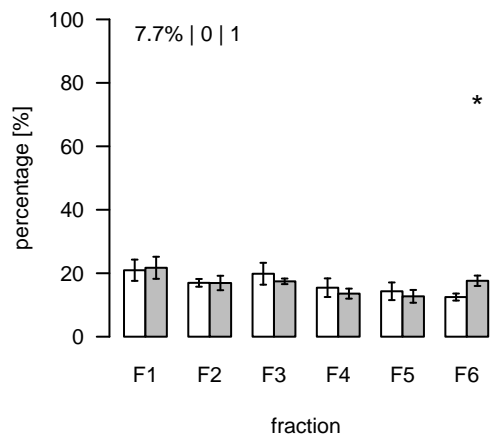

**L2607 (m/z=850.784387; rt=15.58122)**  
T/S Cluster: L-15.6-1

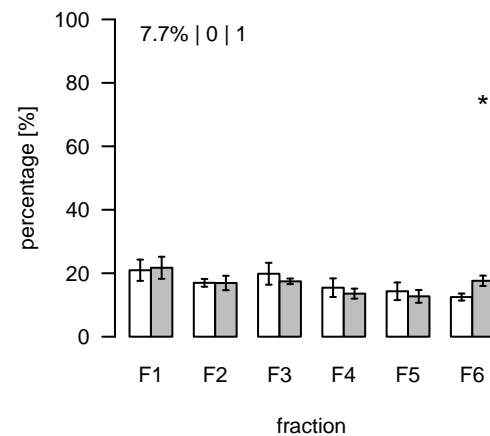

**L2608 (m/z=850.772366; rt=15.58178)**  
T/S Cluster: L-15.6-1

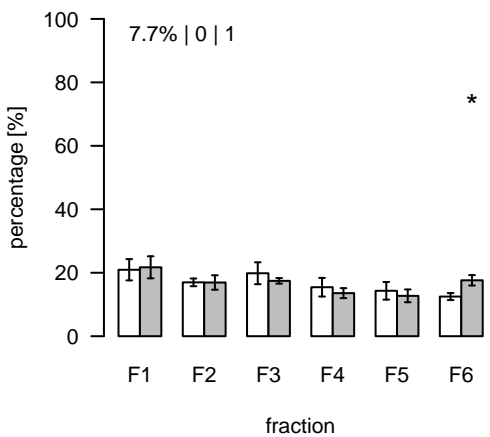

**L2603 (m/z=824.767348; rt=15.56767)**  
T/S Cluster: L-15.6-1

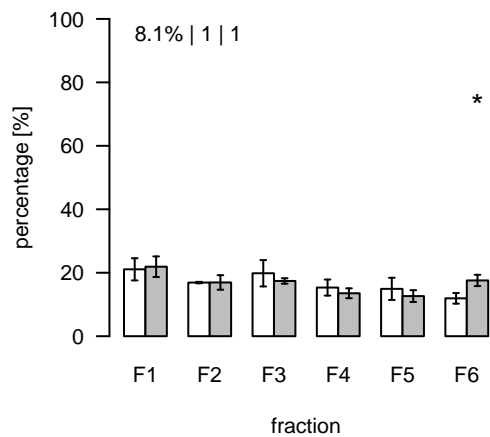

**L2611 (m/z=876.793438; rt=15.58888)**  
T/S Cluster: L-15.6-1

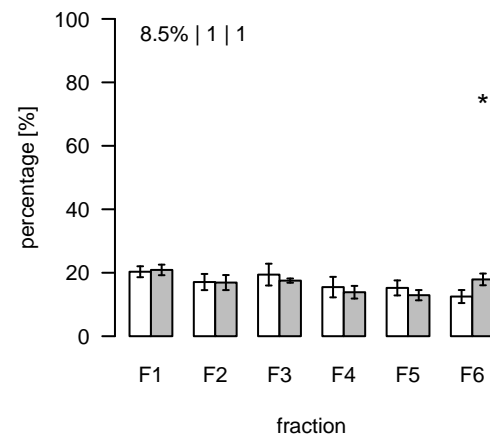

**L2612 (m/z=876.800256; rt=15.589)**  
T/S Cluster: L-15.6-1

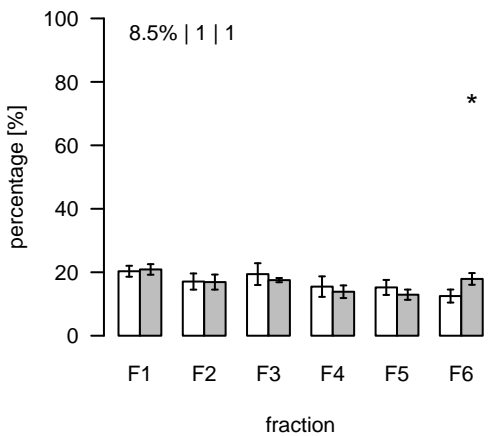

**L2613 (m/z=876.801058; rt=15.58918)**  
T/S Cluster: L-15.6-1

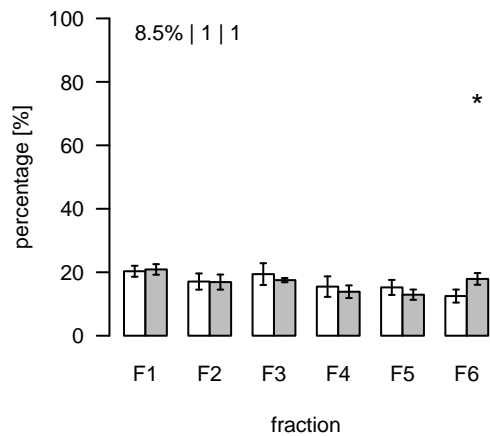

**L2605 (m/z=823.761539; rt=15.5744)**  
T/S Cluster: L-15.6-2

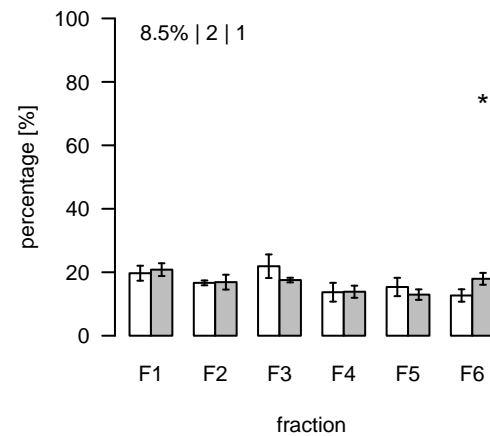

**L2610 (m/z=900.804609; rt=15.58792)**  
T/S Cluster: L-15.6-3

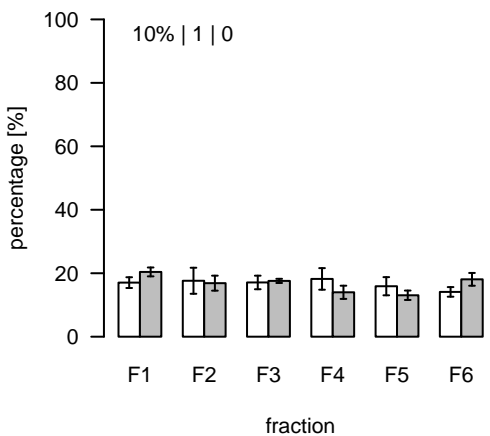

**L2609 (m/z=901.808391; rt=15.5867)**  
T/S Cluster: L-15.6-3

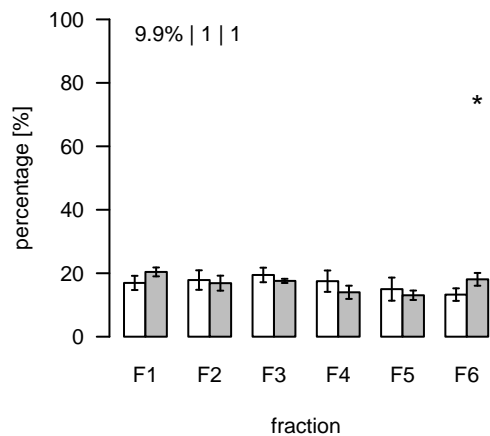

**L2616 (m/z=875.792653; rt=15.59453)**  
T/S Cluster: L-15.6-4

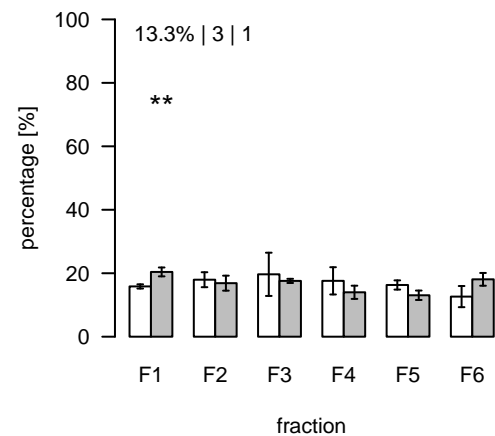

**L2618 (m/z=1425.41018; rt=15.60846)**  
T/S Cluster: L-15.6-5

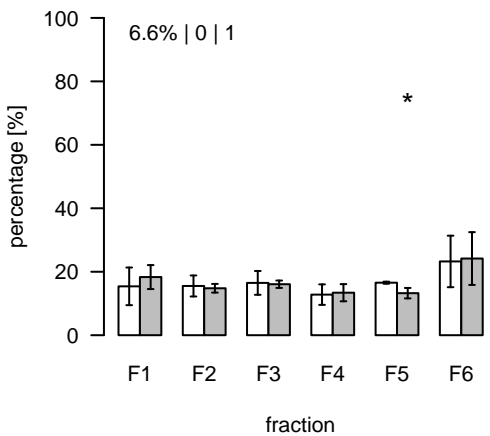

**L2622 (m/z=836.773468; rt=15.70573)**  
T/S Cluster: L-15.7-1

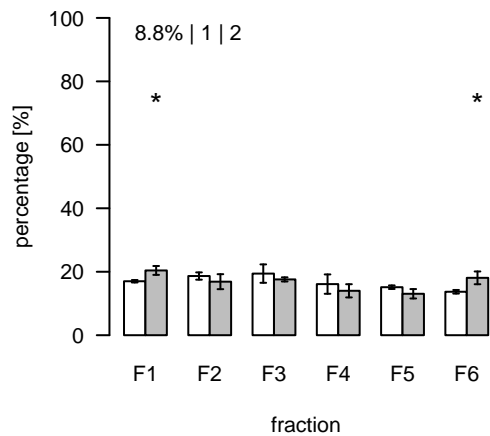

**L2619 (m/z=810.757369; rt=15.68029)**  
T/S Cluster: L-15.7-1

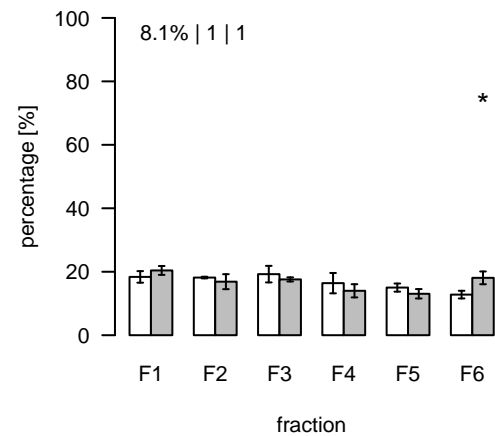

**L2620 (m/z=811.761057; rt=15.68151)**  
T/S Cluster: L-15.7-1

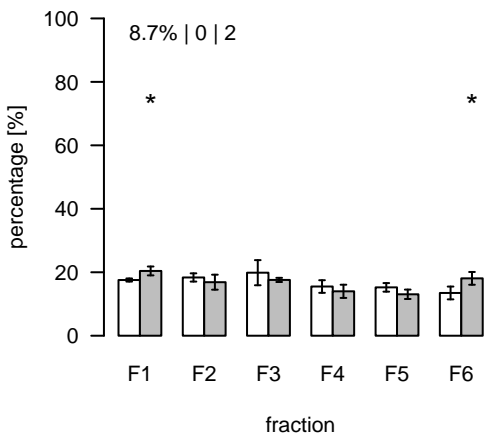

**L2621 (m/z=837.7765; rt=15.70445)**  
T/S Cluster: L-15.7-1

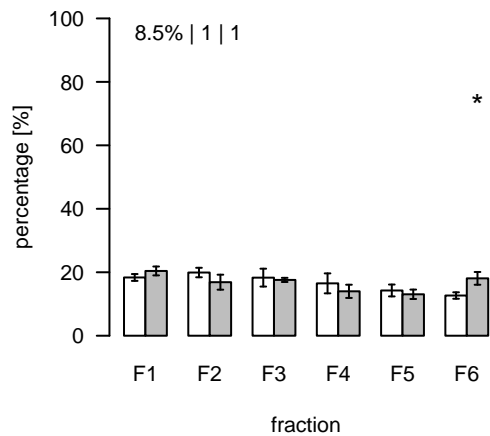

**L2623 (m/z=863.792594; rt=15.72664)**  
T/S Cluster: L-15.7-1

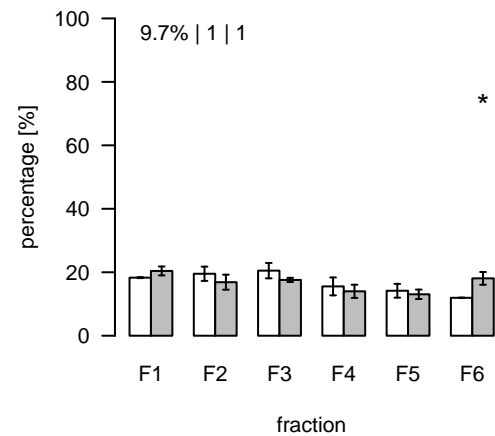

**L2624 (m/z=862.788662; rt=15.72817)**  
T/S Cluster: L-15.7-2

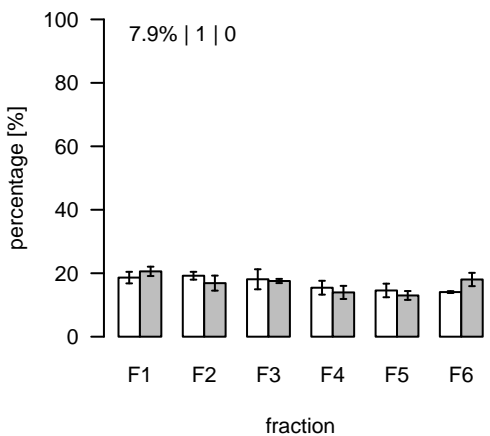

**L2637 (m/z=980.284659; rt=15.81041)**  
T/S Cluster: L-15.8-1

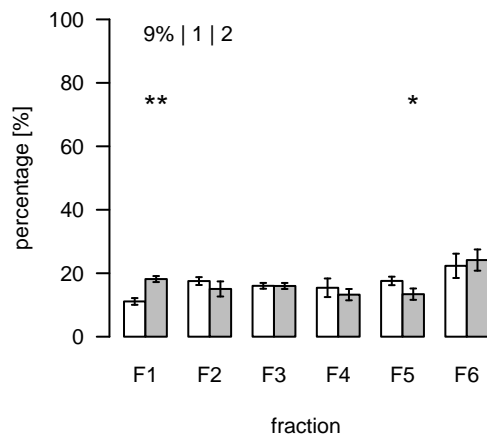

**L2633 (m/z=981.28533; rt=15.81026)**  
T/S Cluster: L-15.8-1

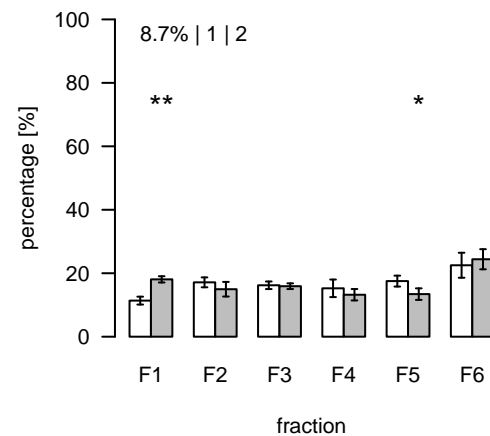

**L2634 (m/z=982.284438; rt=15.81027)**  
T/S Cluster: L-15.8-1

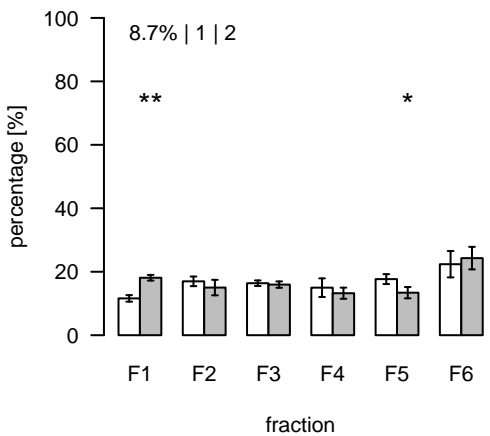

**L2636 (m/z=980.241445; rt=15.81036)**  
T/S Cluster: L-15.8-1

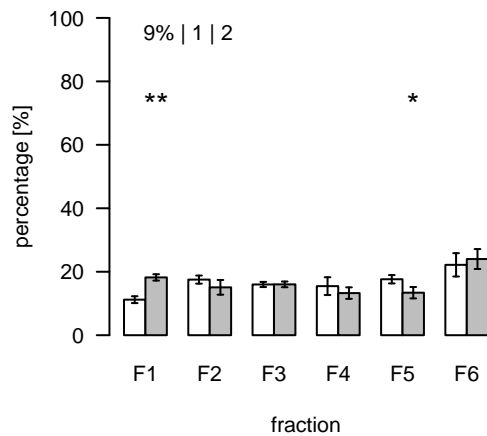

**L2635 (m/z=982.246206; rt=15.81029)**  
T/S Cluster: L-15.8-1

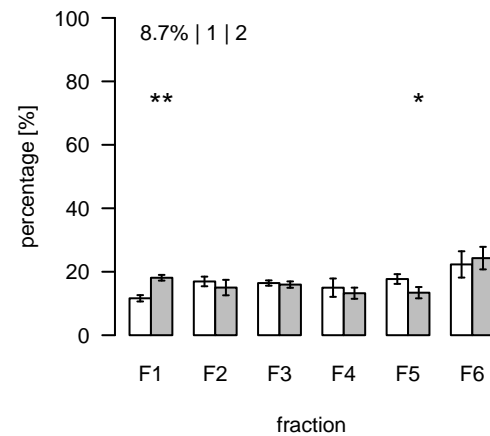

**L2632 (m/z=981.243326; rt=15.8102)**  
T/S Cluster: L-15.8-1

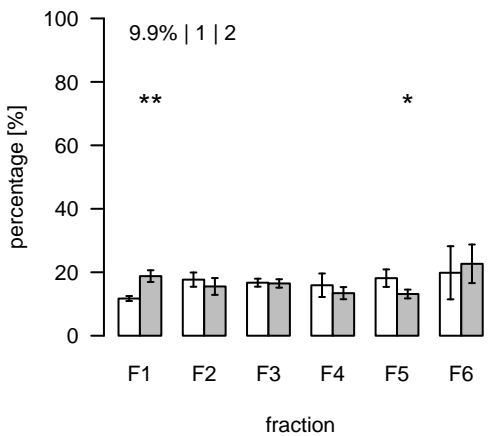

**L2630 (m/z=983.286233; rt=15.81018)**  
T/S Cluster: L-15.8-1

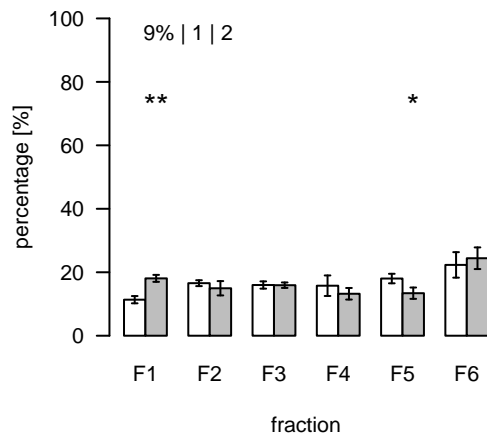

**L2631 (m/z=983.251016; rt=15.81019)**  
T/S Cluster: L-15.8-1

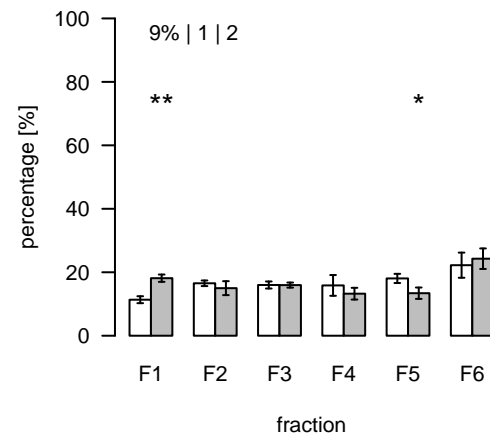

**L2638 (m/z=984.280565; rt=15.81061)**  
T/S Cluster: L-15.8-1

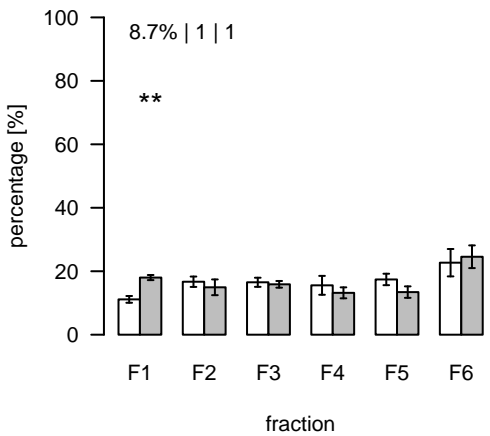

**L2629 (m/z=985.280045; rt=15.80964)**  
T/S Cluster: L-15.8-1

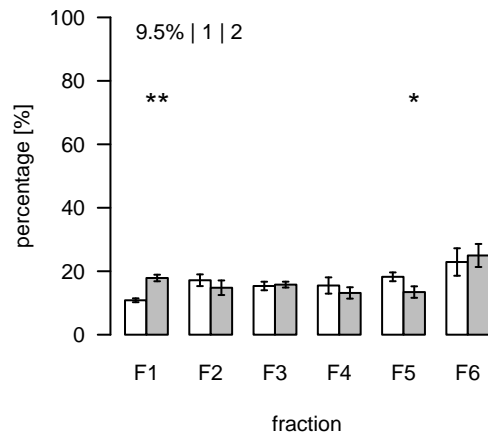

**L2628 (m/z=490.142898; rt=15.80961)**  
T/S Cluster: L-15.8-1

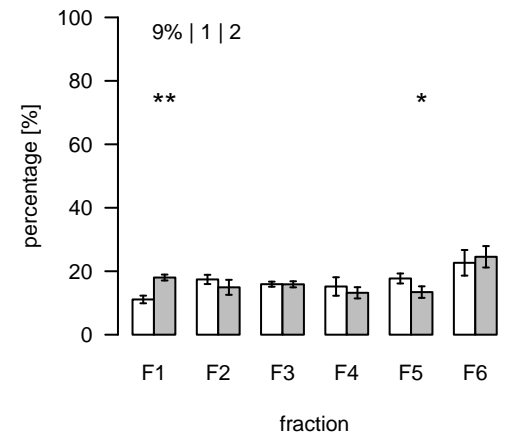

**L2627 (m/z=490.643362; rt=15.80954)**  
T/S Cluster: L-15.8-1

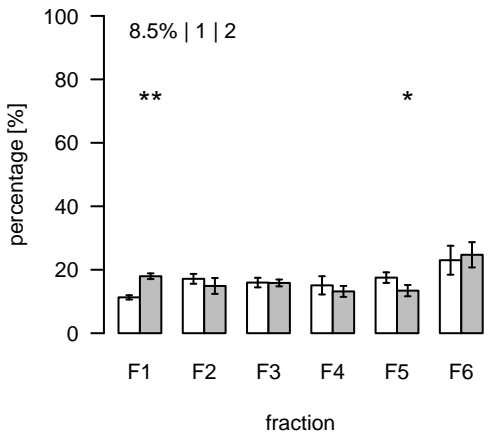

**L2626 (m/z=491.142426; rt=15.8093)**  
T/S Cluster: L-15.8-1

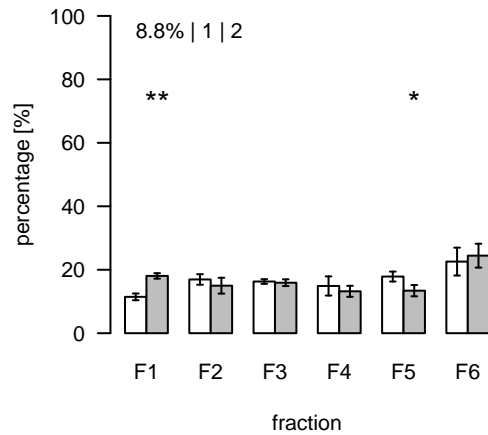

**L2625 (m/z=491.642387; rt=15.80877)**  
T/S Cluster: L-15.8-1

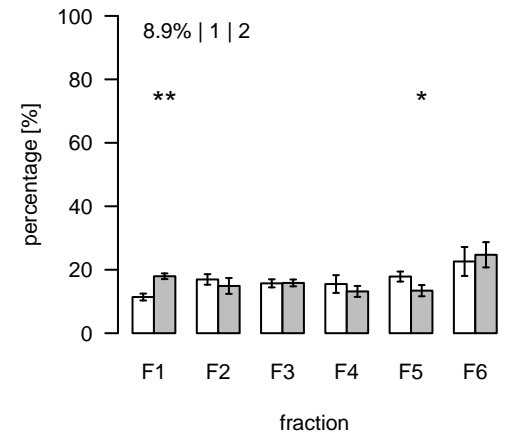

**L2639 (m/z=1023.307804; rt=15.81082)**  
T/S Cluster: L-15.8-2

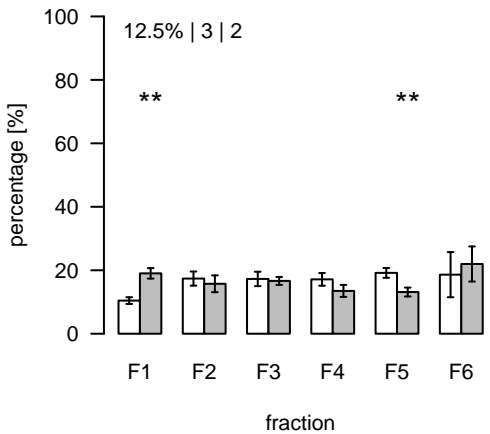

**L2641 (m/z=1022.308847; rt=15.81099)**  
T/S Cluster: L-15.8-2

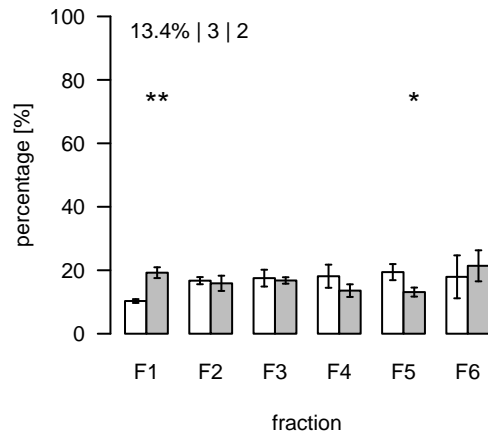

**L2642 (m/z=1024.307678; rt=15.81102)**  
T/S Cluster: L-15.8-2

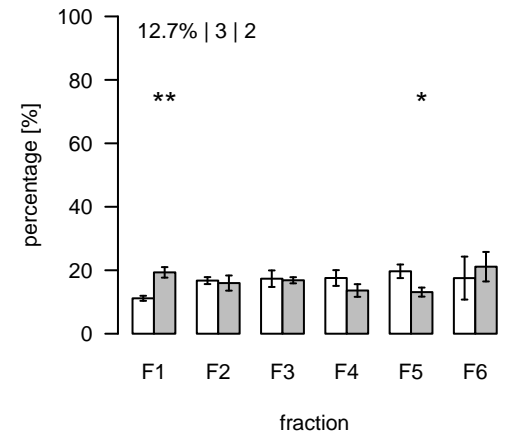

**L2640 (m/z=1021.309384; rt=15.81084)**  
T/S Cluster: L-15.8-2

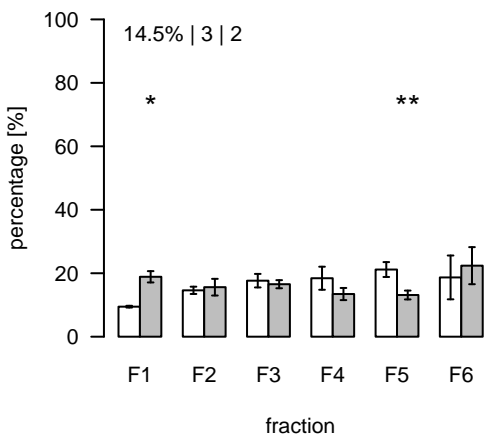

**L2655 (m/z=902.826903; rt=15.8315)**  
T/S Cluster: L-15.8-3

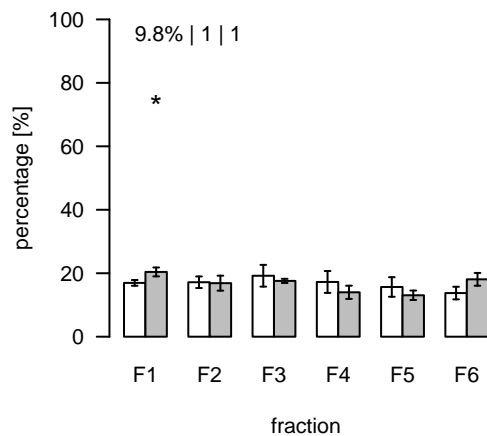

**L2660 (m/z=876.791685; rt=15.8319)**  
T/S Cluster: L-15.8-3

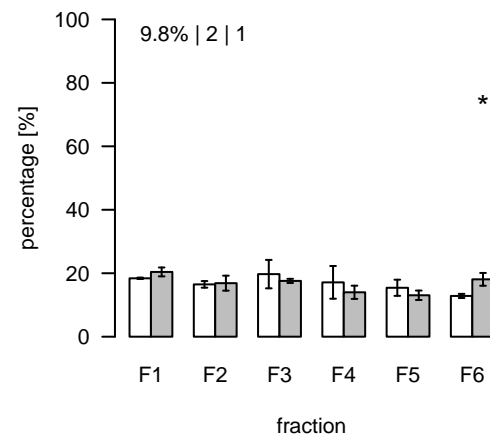

**L2661 (m/z=876.808984; rt=15.83195)**  
T/S Cluster: L-15.8-3

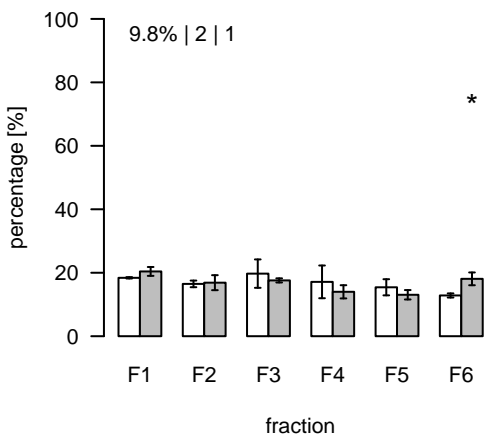

**L2657 (m/z=902.799423; rt=15.83166)**  
T/S Cluster: L-15.8-3

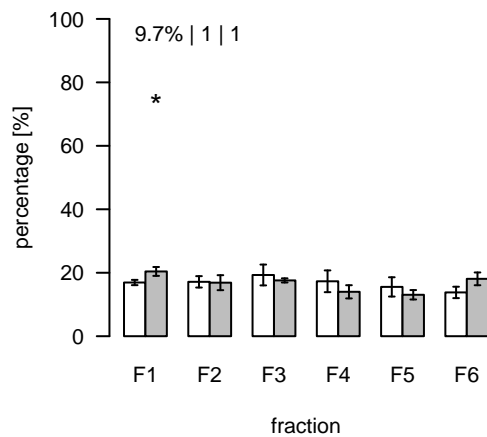

**L2650 (m/z=850.795801; rt=15.82894)**  
T/S Cluster: L-15.8-3

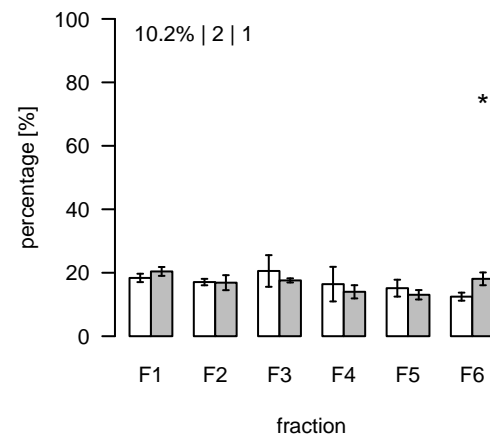

**L2651 (m/z=850.771665; rt=15.82902)**  
T/S Cluster: L-15.8-3

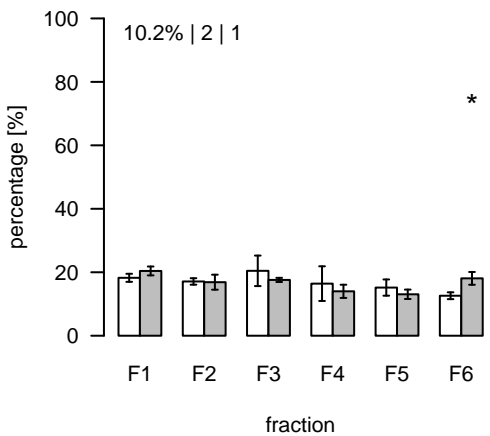

**L2656 (m/z=903.824875; rt=15.83162)**  
T/S Cluster: L-15.8-3

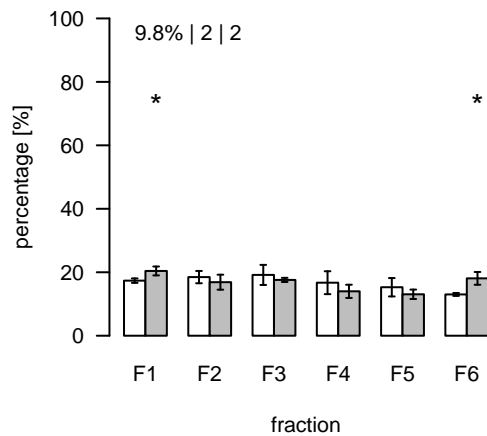

**L2658 (m/z=877.797545; rt=15.83183)**  
T/S Cluster: L-15.8-3

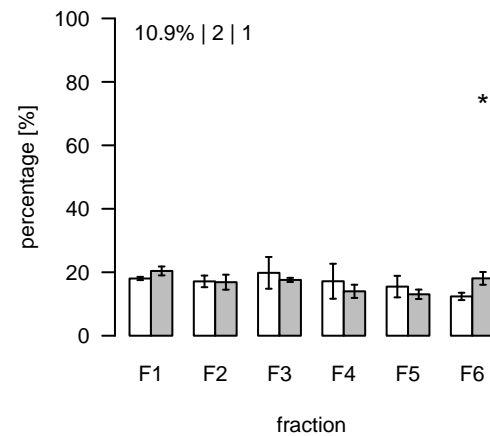

**L2659 (m/z=877.820599; rt=15.83185)**  
T/S Cluster: L-15.8-3

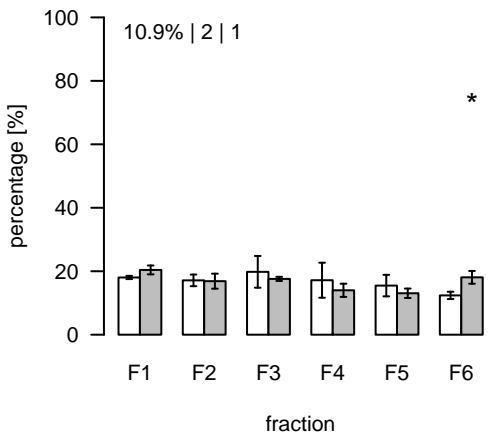

**L2643 (m/z=824.774097; rt=15.82282)**  
T/S Cluster: L-15.8-3

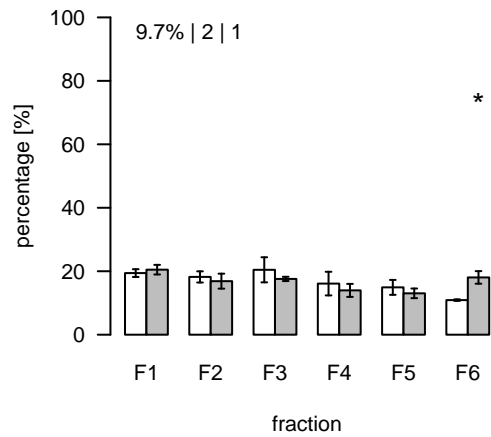

**L2648 (m/z=851.784543; rt=15.82865)**  
T/S Cluster: L-15.8-3

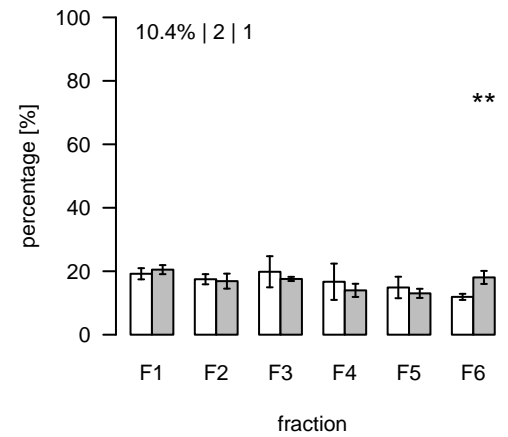

**L2649 (m/z=851.806162; rt=15.82873)**  
T/S Cluster: L-15.8-3

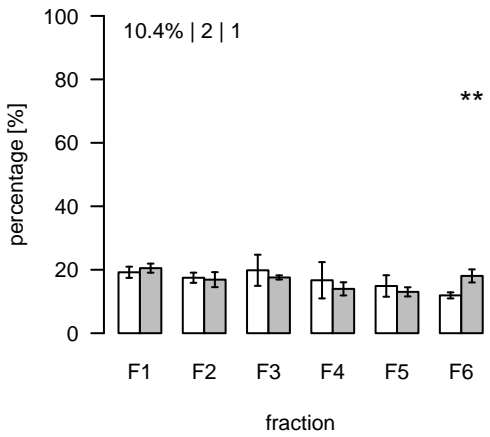

**L2644 (m/z=825.777321; rt=15.82297)**  
T/S Cluster: L-15.8-3

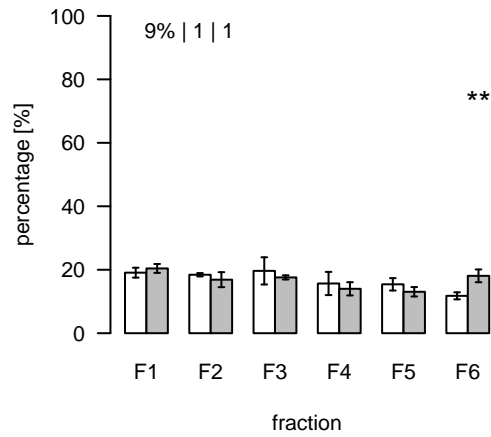

**L2654 (m/z=904.830133; rt=15.82991)**  
T/S Cluster: L-15.8-3

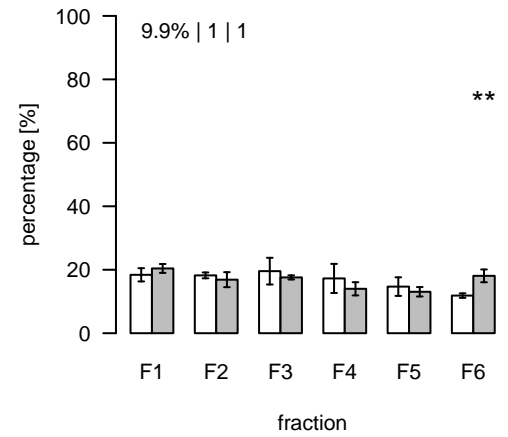

**L2653 (m/z=878.814818; rt=15.82968)**  
T/S Cluster: L-15.8-3

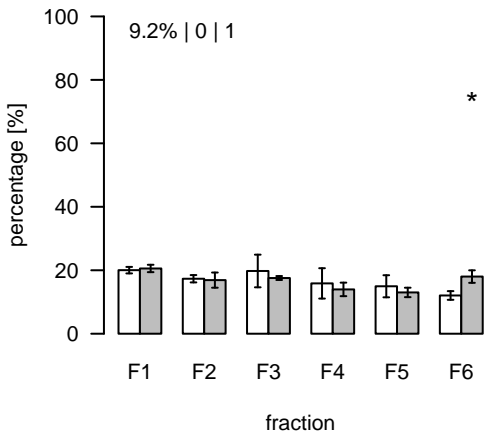

**L2645 (m/z=852.798226; rt=15.82628)**  
T/S Cluster: L-15.8-3

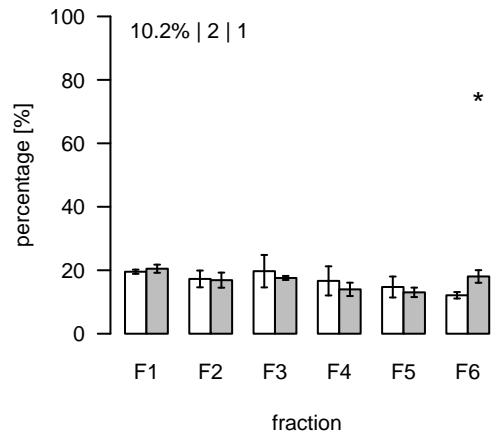

**L2652 (m/z=438.404248; rt=15.8293)**  
T/S Cluster: L-15.8-3

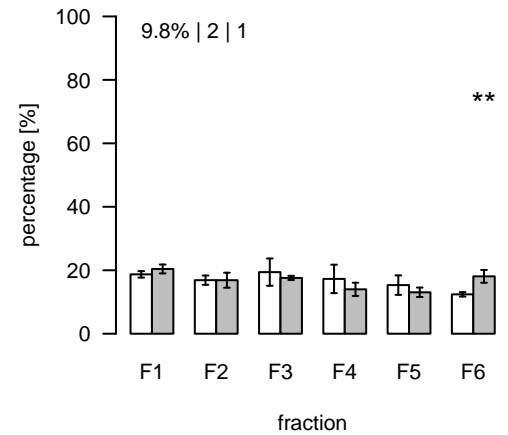

**L2647 (m/z=451.412123; rt=15.82856)**  
T/S Cluster: L-15.8-3

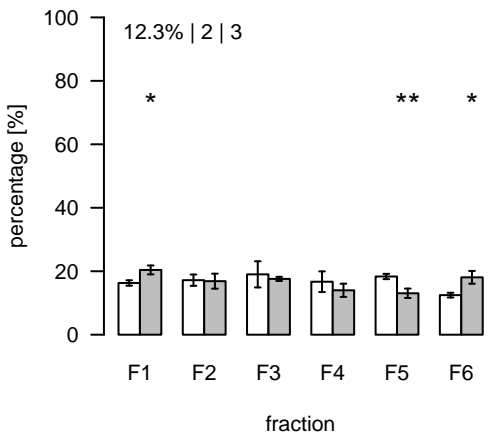

**L2646 (m/z=425.39599; rt=15.82743)**  
T/S Cluster: L-15.8-3

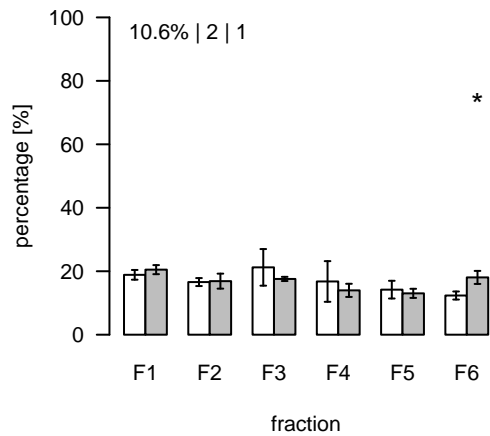

**L2675 (m/z=920.316646; rt=15.84431)**  
T/S Cluster: L-15.8-4

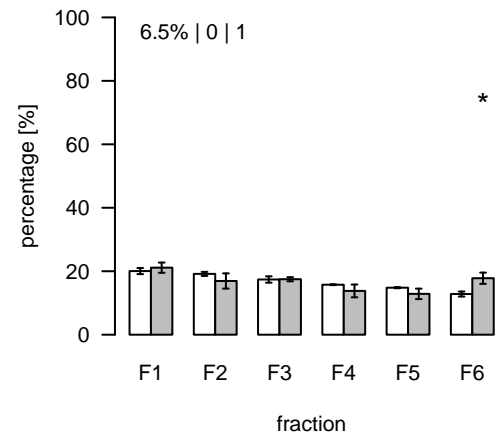

**L2672 (m/z=921.317847; rt=15.84422)**  
T/S Cluster: L-15.8-4

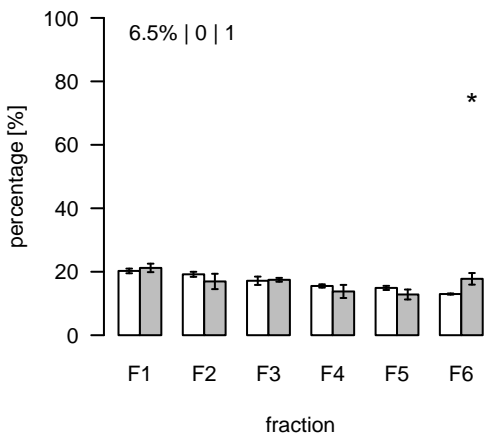

**L2670 (m/z=922.318411; rt=15.84417)**  
T/S Cluster: L-15.8-4

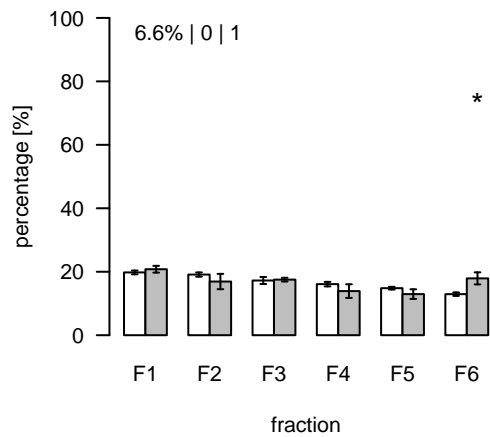

**L2674 (m/z=922.286687; rt=15.84429)**  
T/S Cluster: L-15.8-4

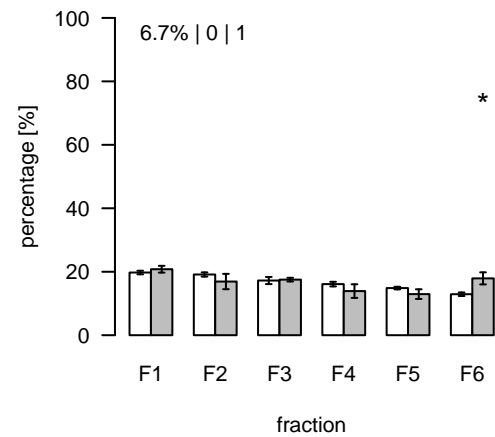

**L2679 (m/z=920.274095; rt=15.84454)**  
T/S Cluster: L-15.8-4

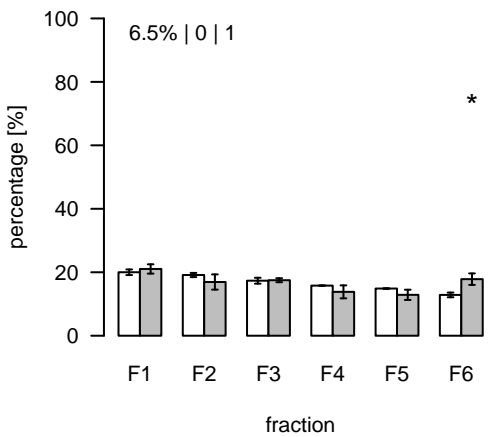

**L2677 (m/z=921.27974; rt=15.84438)**  
T/S Cluster: L-15.8-4

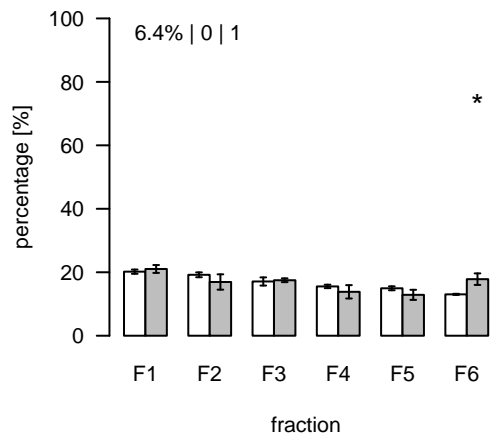

**L2676 (m/z=923.294113; rt=15.84434)**  
T/S Cluster: L-15.8-4

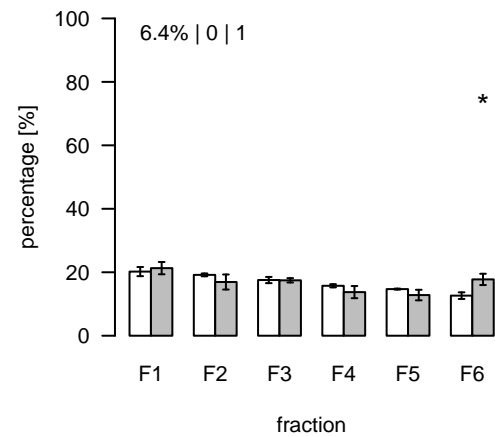

**L2671 (m/z=923.321978; rt=15.84418)**  
T/S Cluster: L-15.8-4

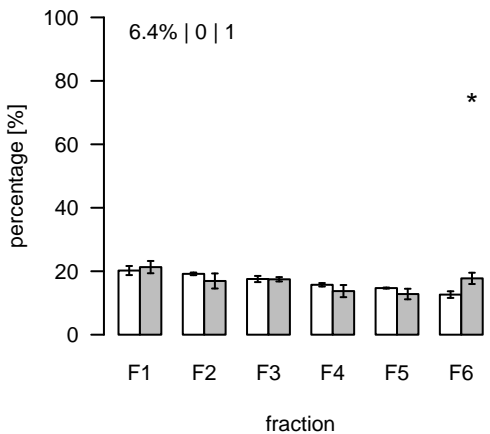

**L2678 (m/z=924.313517; rt=15.84451)**  
T/S Cluster: L-15.8-4

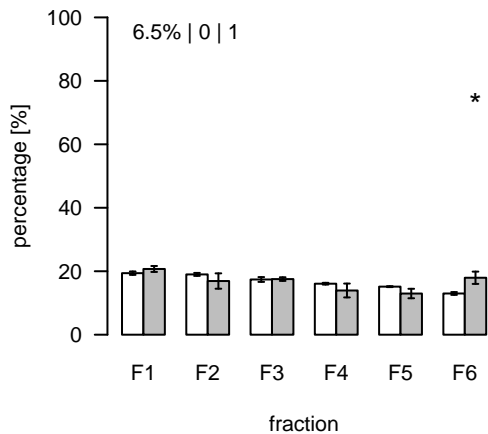

**L2668 (m/z=925.312678; rt=15.84396)**  
T/S Cluster: L-15.8-4

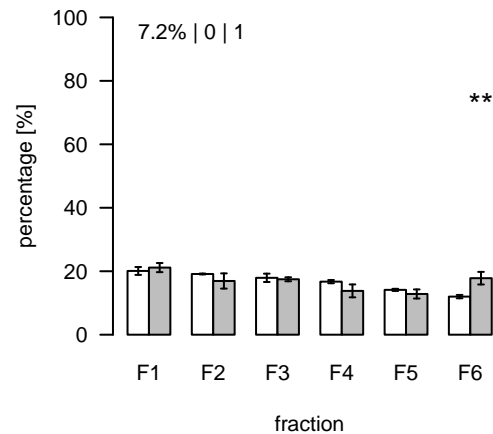

**L2673 (m/z=460.164306; rt=15.84426)**  
T/S Cluster: L-15.8-4

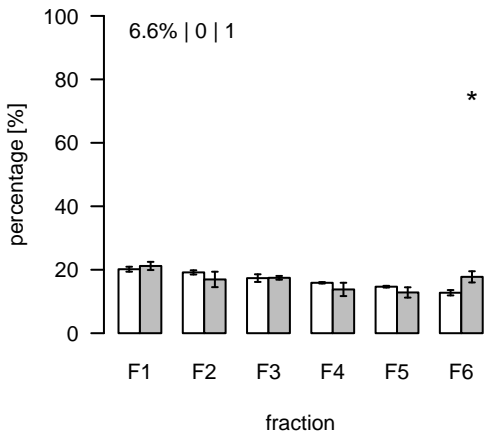

**L2680 (m/z=460.156474; rt=15.84455)**  
T/S Cluster: L-15.8-4

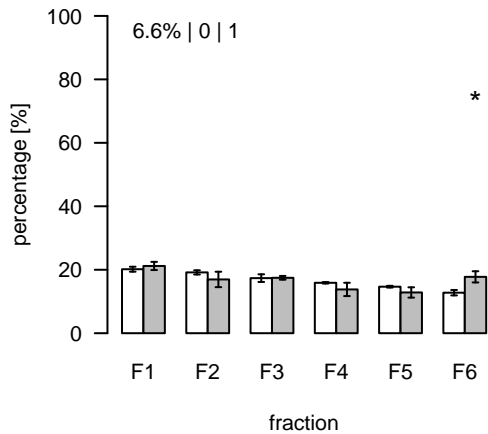

**L2669 (m/z=460.657971; rt=15.84407)**  
T/S Cluster: L-15.8-4

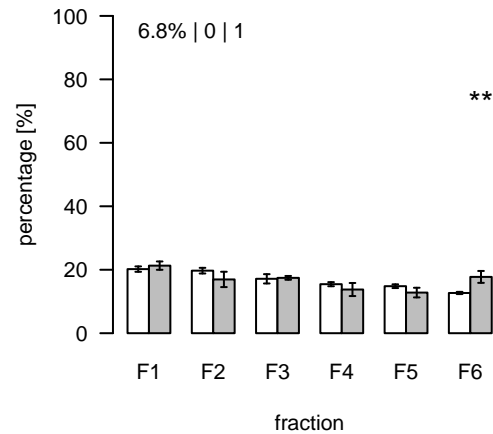

**L2666 (m/z=461.158572; rt=15.8436)**  
T/S Cluster: L-15.8-4

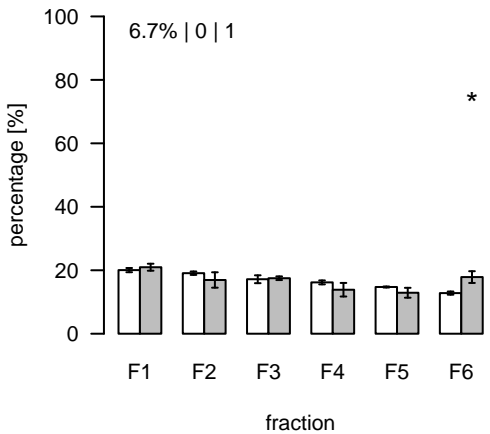

**L2667 (m/z=460.666603; rt=15.84373)**  
T/S Cluster: L-15.8-4

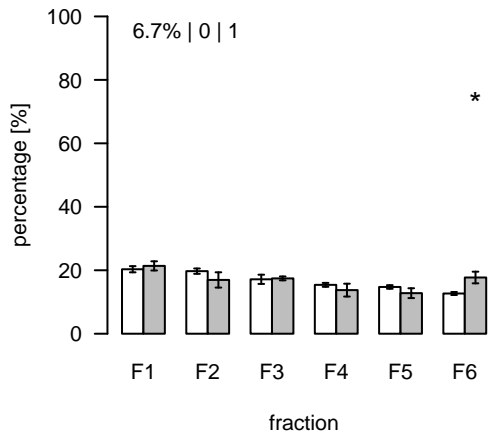

**L2663 (m/z=306.776754; rt=15.84244)**  
T/S Cluster: L-15.8-4

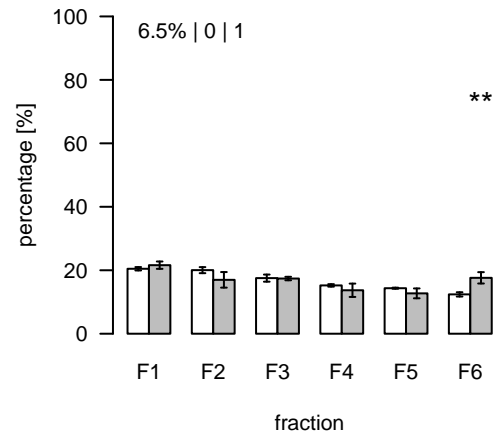



**L2665 (m/z=461.658473; rt=15.84291)**  
T/S Cluster: L-15.8-4

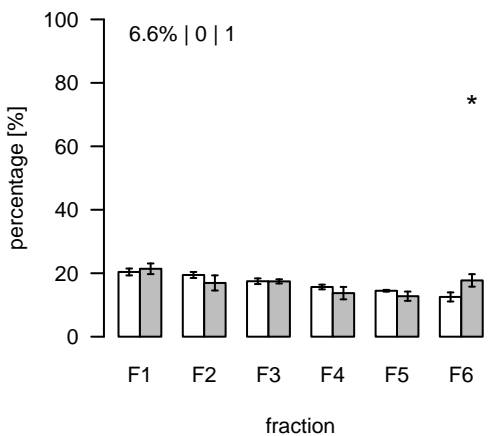

**L2664 (m/z=926.312827; rt=15.84248)**  
T/S Cluster: L-15.8-4

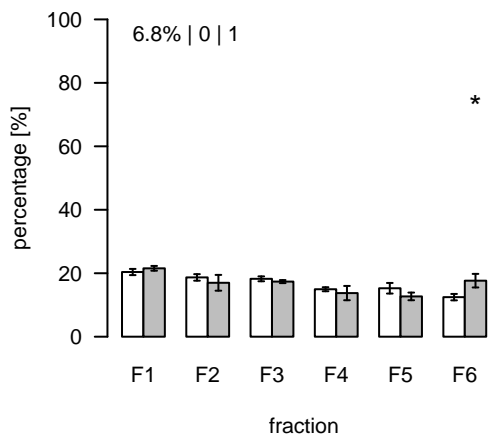

**L2662 (m/z=307.110388; rt=15.84191)**  
T/S Cluster: L-15.8-4

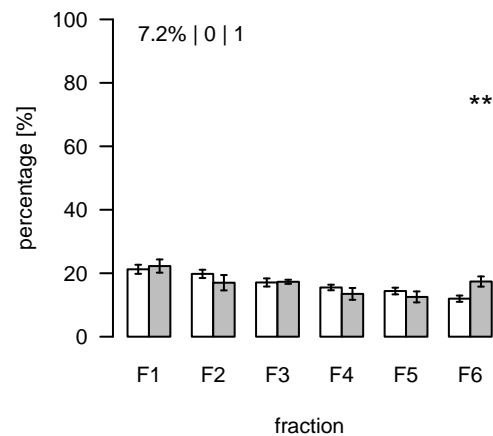

**L2683 (m/z=864.804707; rt=15.94793)**  
T/S Cluster: L-15.9-1

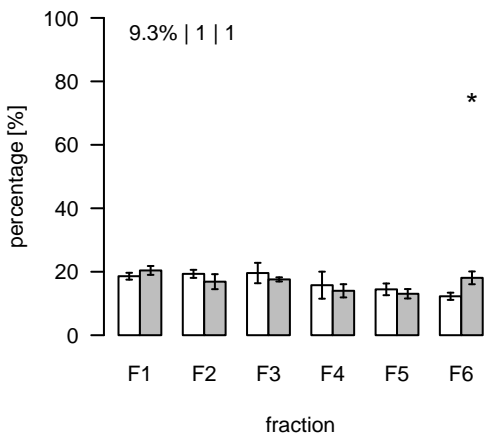

**L2681 (m/z=838.789083; rt=15.93451)**  
T/S Cluster: L-15.9-1

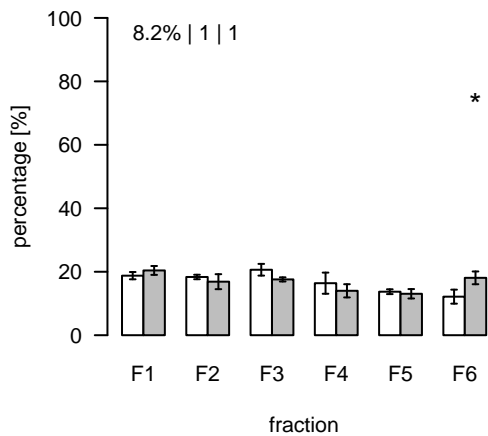

**L2682 (m/z=865.808442; rt=15.94687)**  
T/S Cluster: L-15.9-1

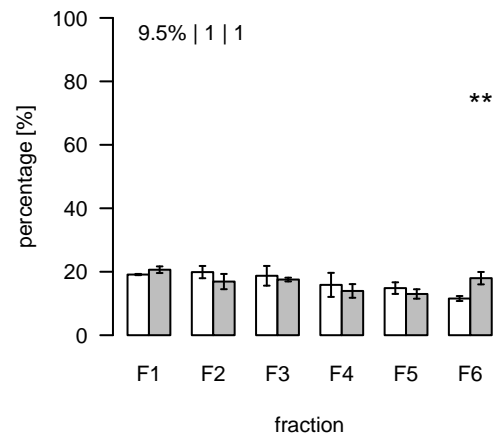

**L2684 (m/z=890.819122; rt=15.95836)**  
T/S Cluster: L-16-1

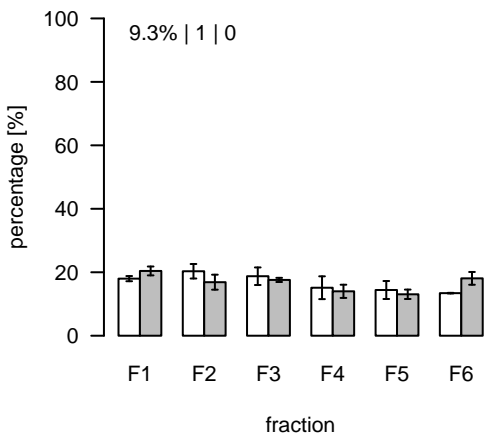

**L2685 (m/z=924.862333; rt=16.0421)**  
T/S Cluster: L-16-2

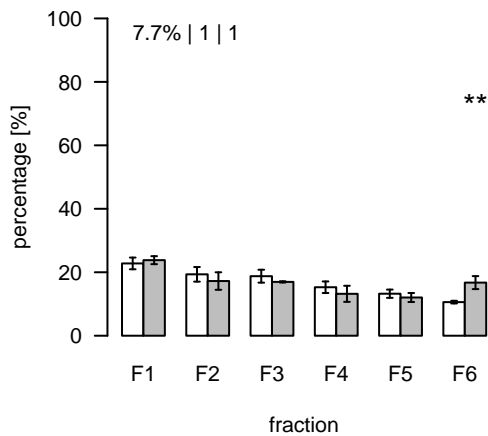

**L2690 (m/z=878.820353; rt=16.06301)**  
T/S Cluster: L-16.1-1

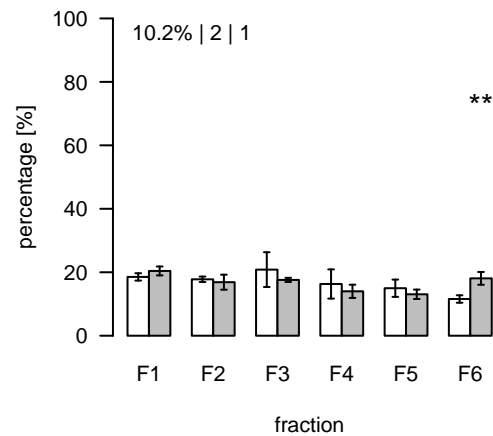

**L2691 (m/z=904.835481; rt=16.06388)**  
T/S Cluster: L-16.1-1

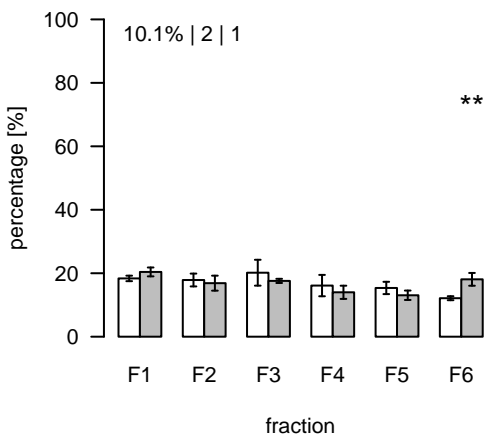

**L2687 (m/z=852.804454; rt=16.06162)**  
T/S Cluster: L-16.1-1

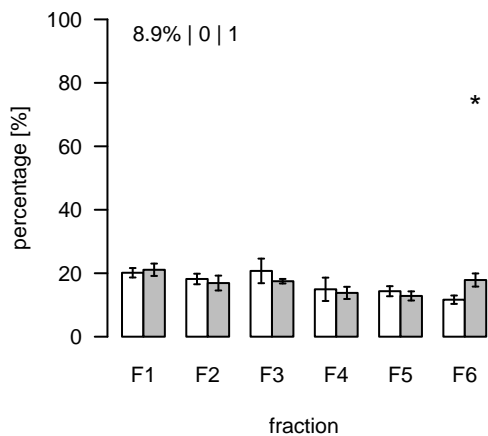

**L2689 (m/z=879.824126; rt=16.062)**  
T/S Cluster: L-16.1-1

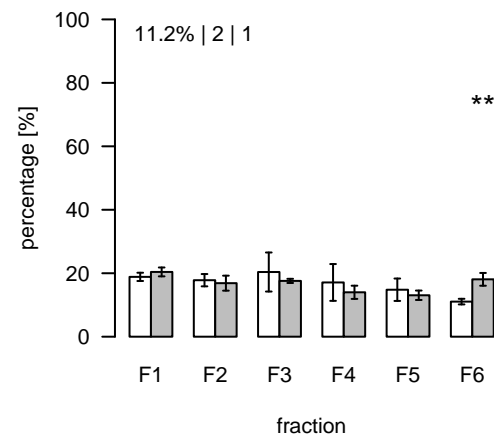

**L2686 (m/z=905.838883; rt=16.06124)**  
T/S Cluster: L-16.1-1

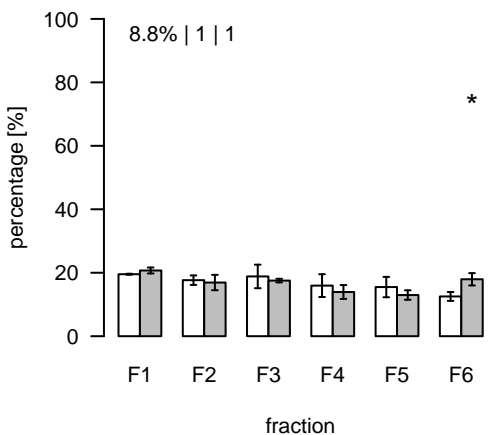

**L2688 (m/z=853.80813; rt=16.06164)**  
T/S Cluster: L-16.1-1

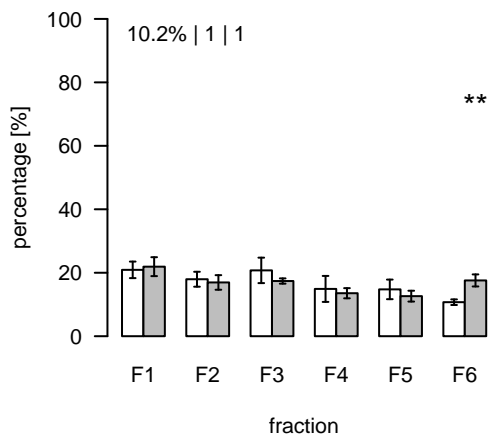

**L2700 (m/z=995.338274; rt=16.15619)**  
T/S Cluster: L-16.2-1

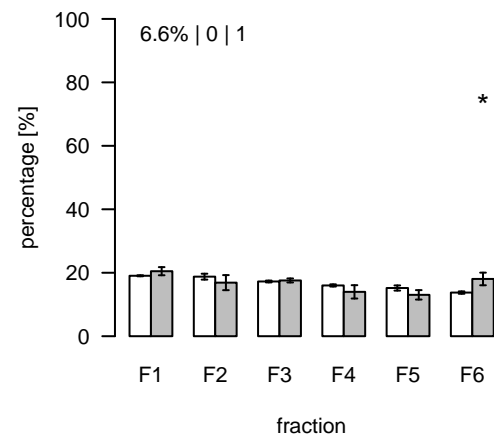

**L2703 (m/z=996.339399; rt=16.1563)**  
T/S Cluster: L-16.2-1

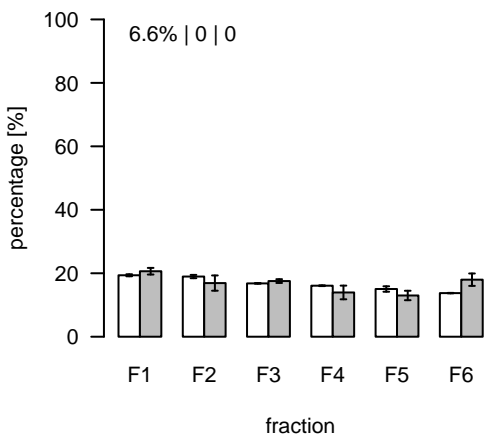

**L2702 (m/z=994.342891; rt=16.15623)**  
T/S Cluster: L-16.2-1

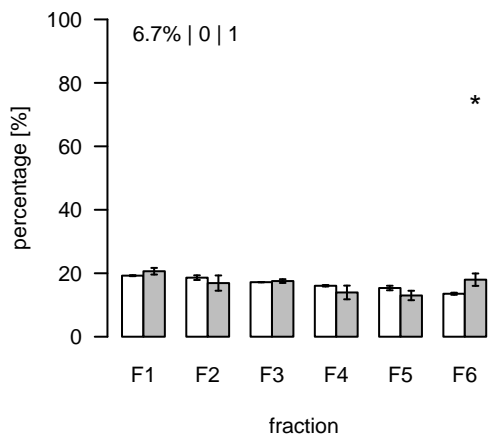

**L2698 (m/z=994.309468; rt=16.15615)**  
T/S Cluster: L-16.2-1

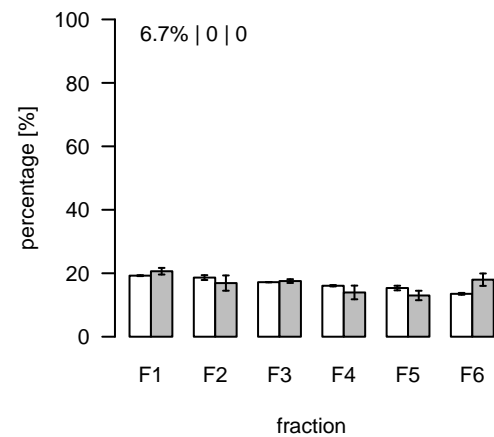

**L2699 (m/z=995.297071; rt=16.15616)**  
T/S Cluster: L-16.2-1

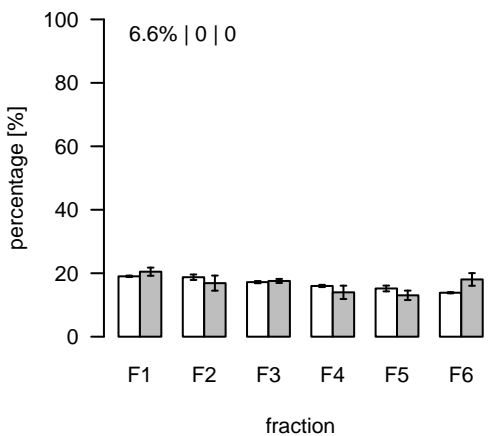

**L2701 (m/z=996.303748; rt=16.15622)**  
T/S Cluster: L-16.2-1

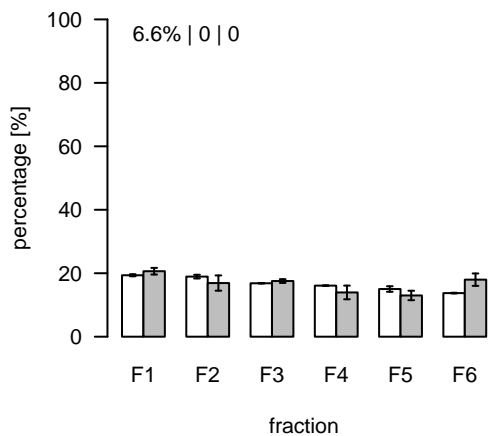

**L2705 (m/z=997.311782; rt=16.15636)**  
T/S Cluster: L-16.2-1

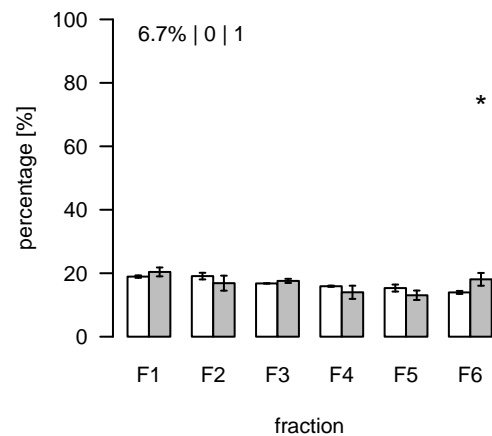

**L2706 (m/z=997.343689; rt=16.1564)**  
T/S Cluster: L-16.2-1

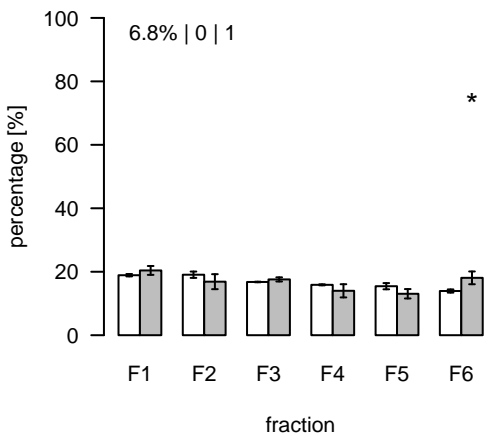

**L2704 (m/z=998.332735; rt=16.15635)**  
T/S Cluster: L-16.2-1

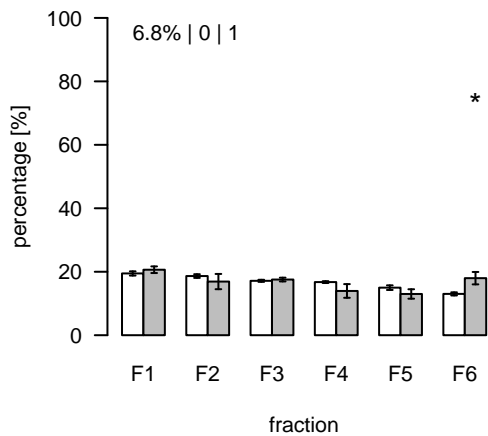

**L2694 (m/z=497.669313; rt=16.15508)**  
T/S Cluster: L-16.2-1

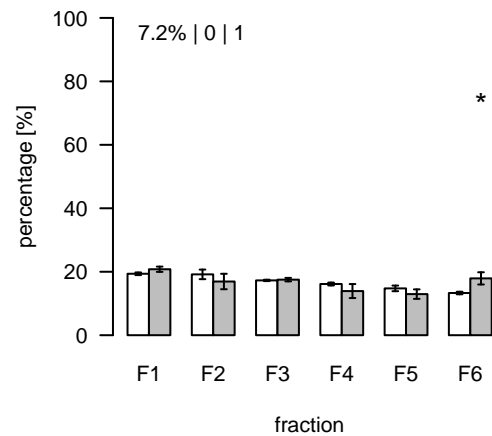

**L2696 (m/z=497.169149; rt=16.15517)**  
T/S Cluster: L-16.2-1

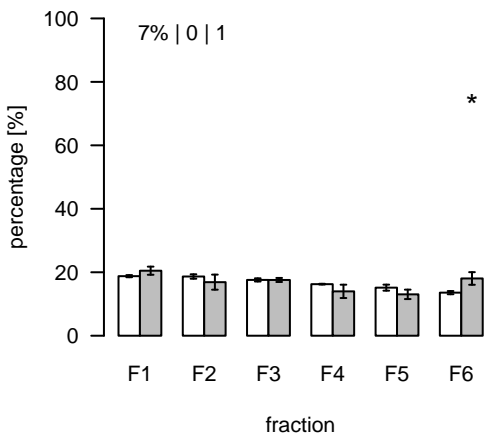

**L2697 (m/z=999.332143; rt=16.15542)**  
T/S Cluster: L-16.2-1

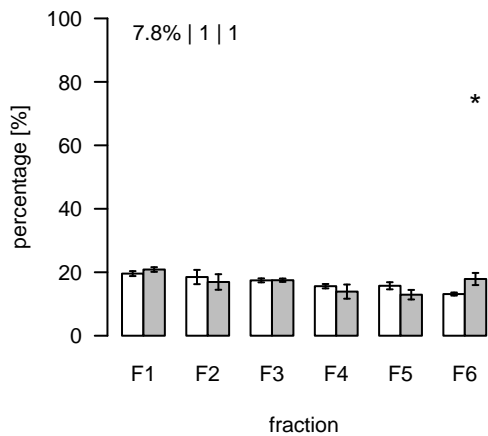

**L2695 (m/z=498.168726; rt=16.15512)**  
T/S Cluster: L-16.2-1

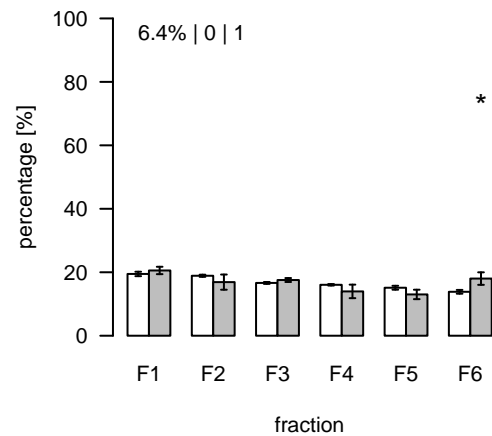

**L2692 (m/z=498.668636; rt=16.15467)**  
T/S Cluster: L-16.2-1

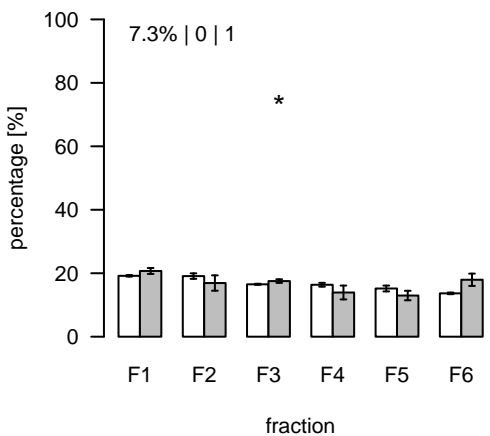

**L2693 (m/z=1000.332175; rt=16.15481)**  
T/S Cluster: L-16.2-2

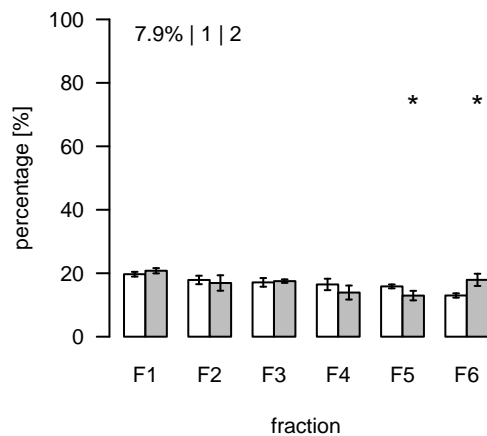

**L2707 (m/z=866.821291; rt=16.16538)**  
T/S Cluster: L-16.2-3

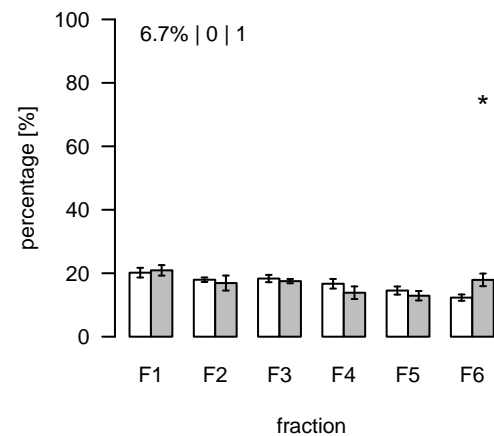

**L2708 (m/z=892.836476; rt=16.17521)**  
T/S Cluster: L-16.2-4

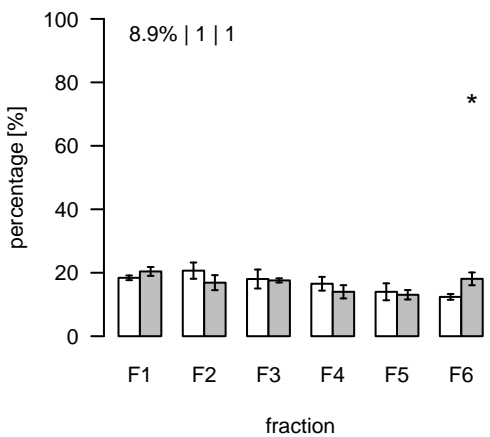

**L2715 (m/z=1055.308979; rt=16.17868)**  
T/S Cluster: L-16.2-5

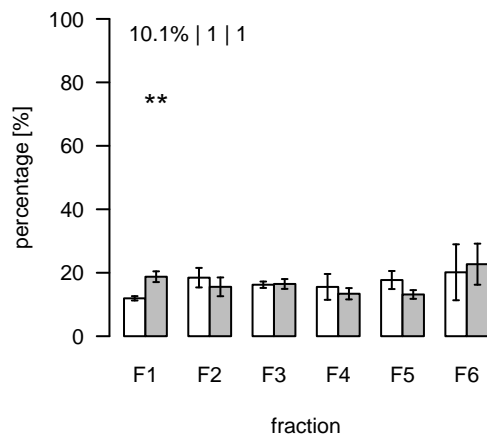

**L2717 (m/z=1054.309167; rt=16.17881)**  
T/S Cluster: L-16.2-5

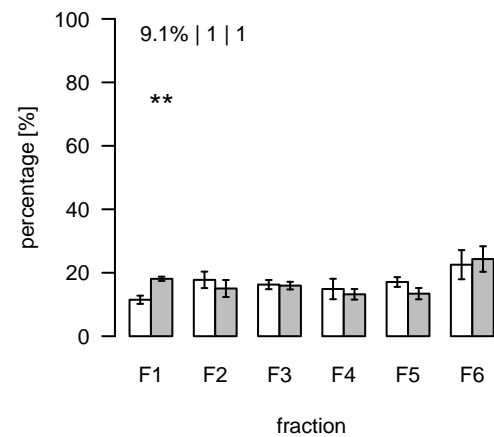

**L2716 (m/z=1056.307451; rt=16.1788)**  
T/S Cluster: L-16.2-5

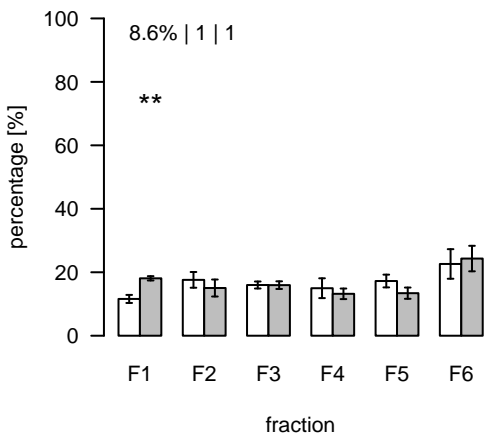

**L2722 (m/z=1054.26999; rt=16.17899)**  
T/S Cluster: L-16.2-5

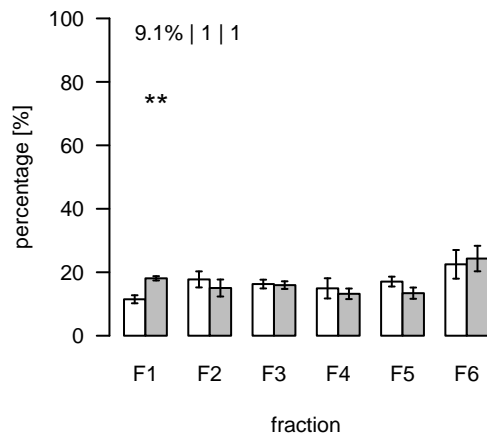

**L2718 (m/z=1055.267851; rt=16.17884)**  
T/S Cluster: L-16.2-5

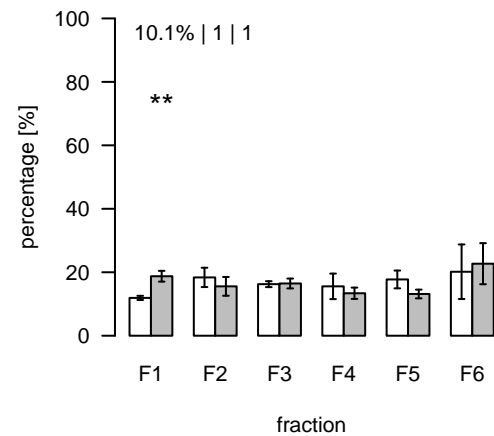

**L2721 (m/z=1056.267286; rt=16.17898)**  
T/S Cluster: L-16.2-5

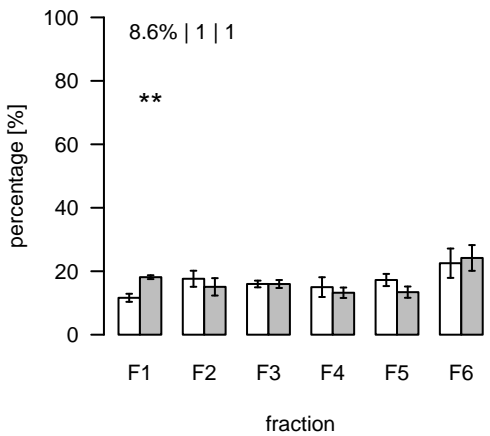

**L2724 (m/z=1057.306916; rt=16.17915)**  
T/S Cluster: L-16.2-5

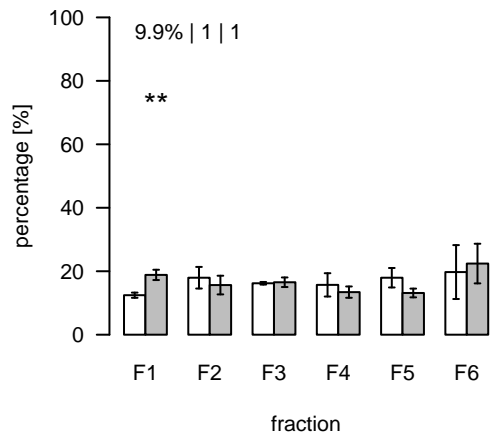

**L2725 (m/z=1057.268766; rt=16.17925)**  
T/S Cluster: L-16.2-5

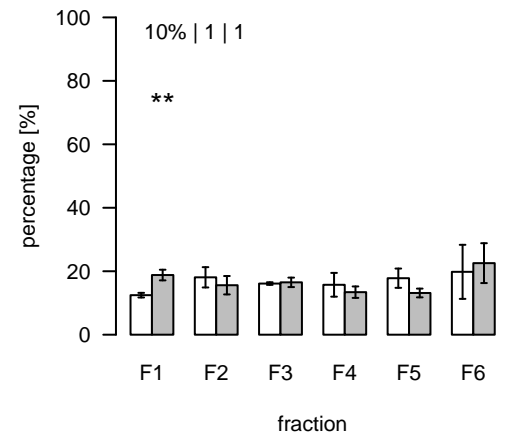

**L2719 (m/z=1058.300589; rt=16.17896)**  
T/S Cluster: L-16.2-5

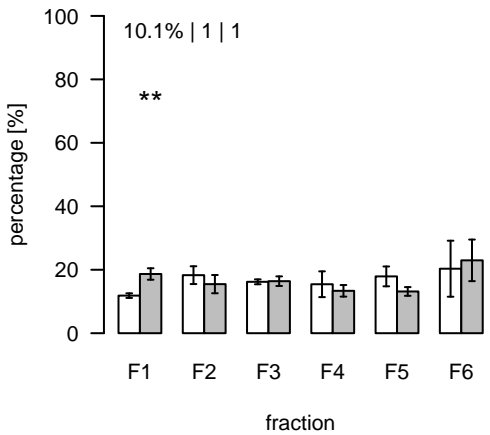

**L2714 (m/z=1059.299908; rt=16.17837)**  
T/S Cluster: L-16.2-5

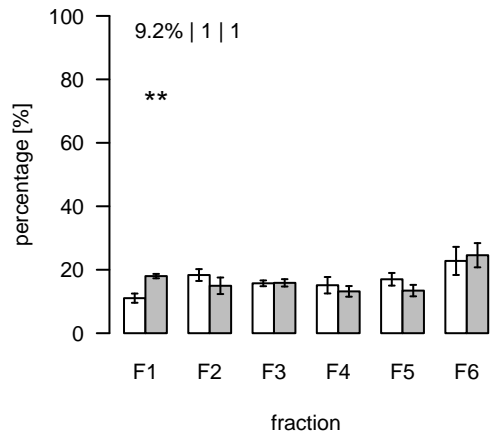

**L2712 (m/z=527.152642; rt=16.17782)**  
T/S Cluster: L-16.2-5

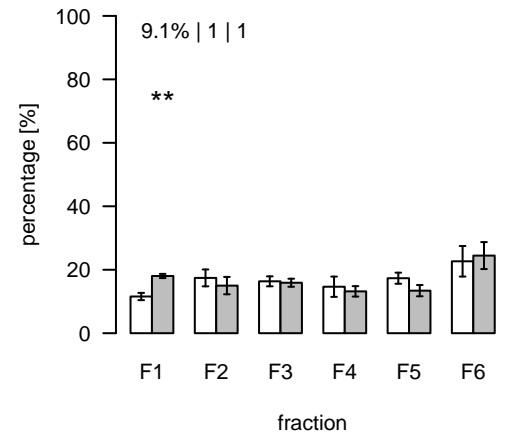

**L2710 (m/z=527.653239; rt=16.17764)**  
T/S Cluster: L-16.2-5

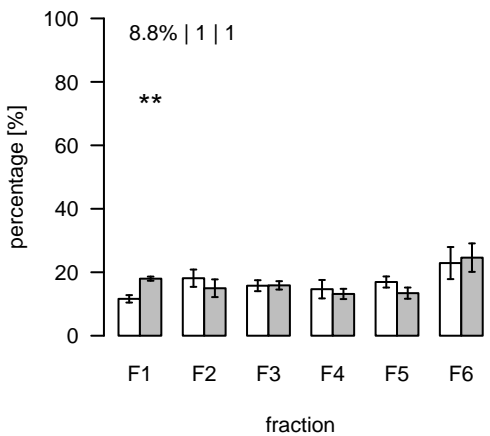

**L2711 (m/z=528.152414; rt=16.1777)**  
T/S Cluster: L-16.2-5

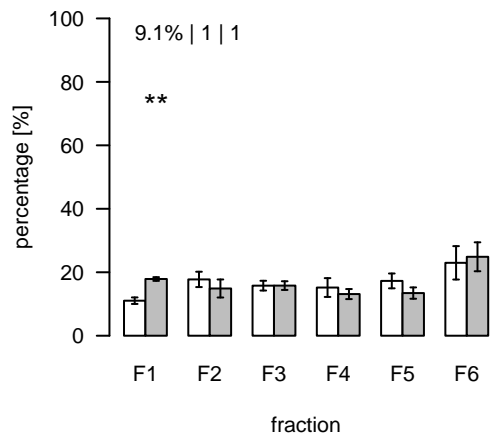

**L2713 (m/z=1060.299516; rt=16.17787)**  
T/S Cluster: L-16.2-5

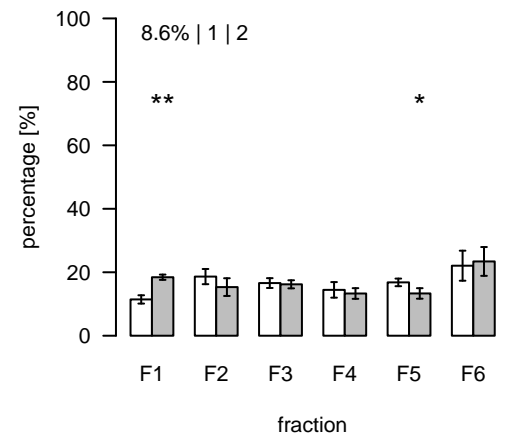

**L2709 (m/z=528.652767; rt=16.17727)**  
T/S Cluster: L-16.2-5

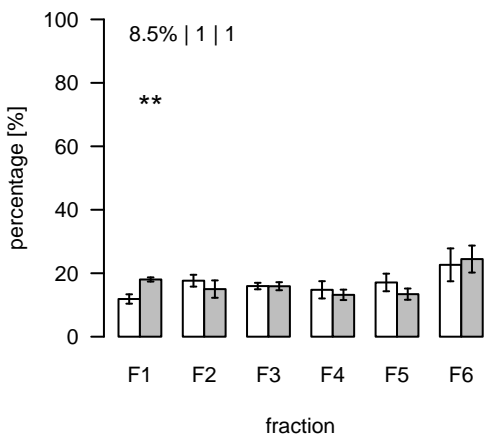

**L2726 (m/z=1096.329156; rt=16.17966)**  
T/S Cluster: L-16.2-6

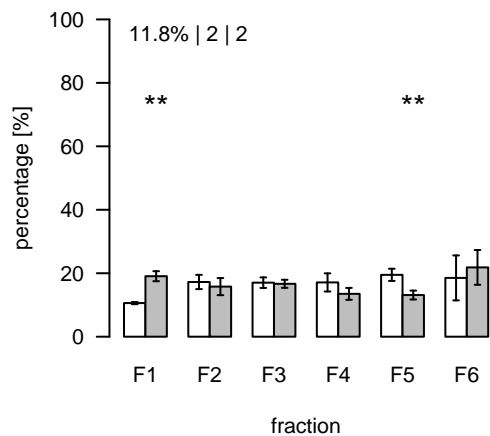

**L2727 (m/z=1097.328083; rt=16.18005)**  
T/S Cluster: L-16.2-6

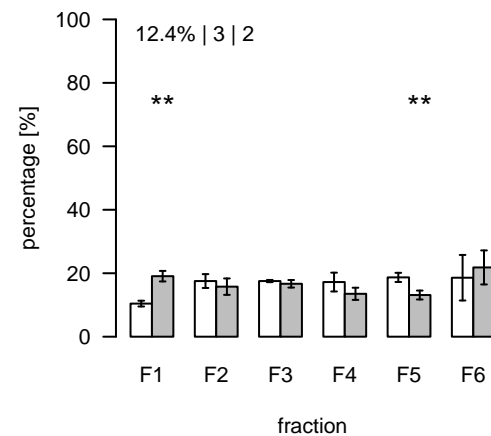

**L2723 (m/z=1098.327838; rt=16.17909)**  
T/S Cluster: L-16.2-6

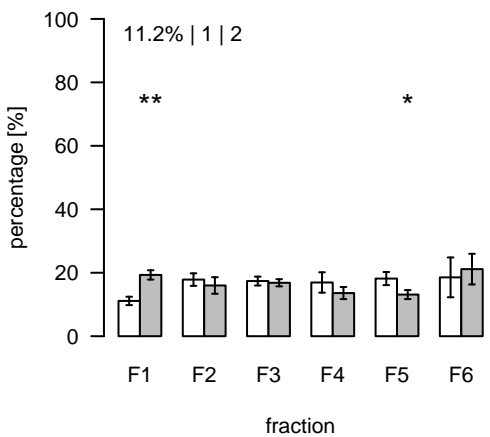

**L2720 (m/z=1095.329566; rt=16.17897)**  
T/S Cluster: L-16.2-6

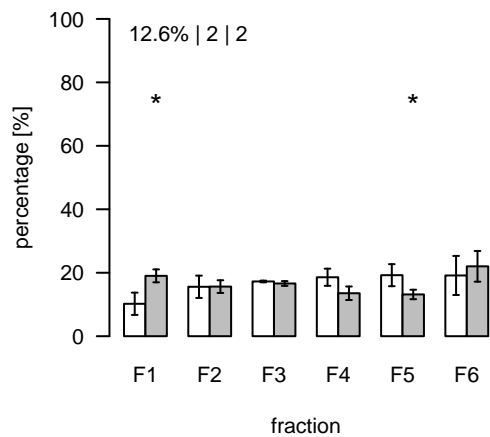

**L2728 (m/z=952.893535; rt=16.26236)**  
T/S Cluster: L-16.3-1

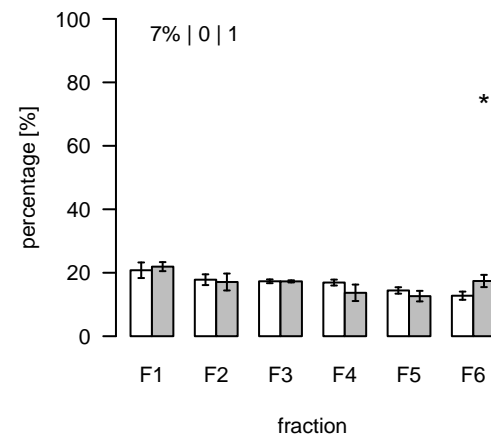

**L2731 (m/z=906.851493; rt=16.28727)**  
T/S Cluster: L-16.3-2

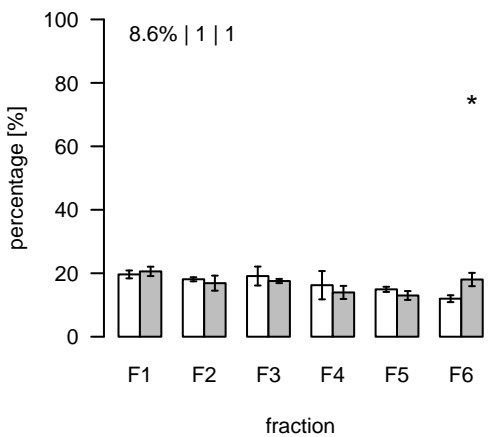

**L2729 (m/z=907.85486; rt=16.28638)**  
T/S Cluster: L-16.3-2

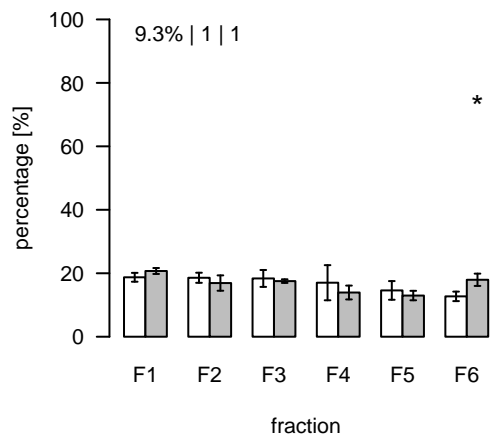

**L2730 (m/z=880.83559; rt=16.28646)**  
T/S Cluster: L-16.3-3

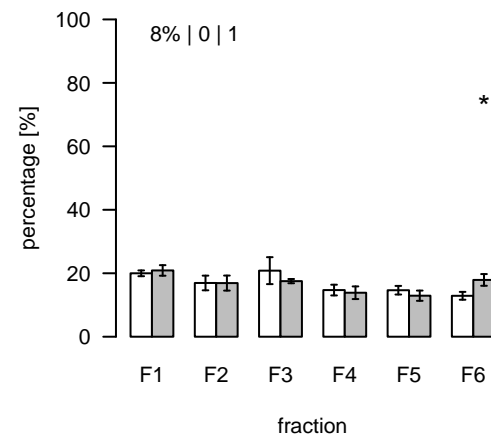

**L2732 (m/z=920.867383; rt=16.42138)**  
T/S Cluster: L-16.4-1

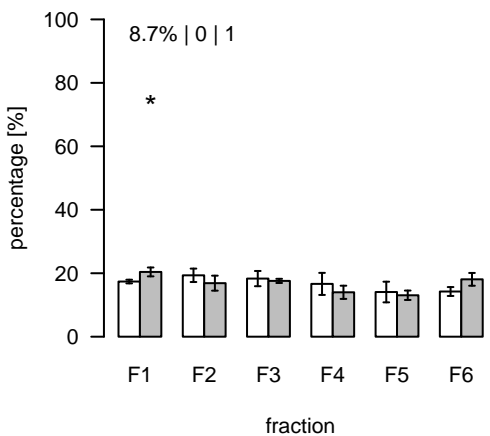

**L2733 (m/z=1072.352989; rt=16.4534)**  
T/S Cluster: L-16.5-1

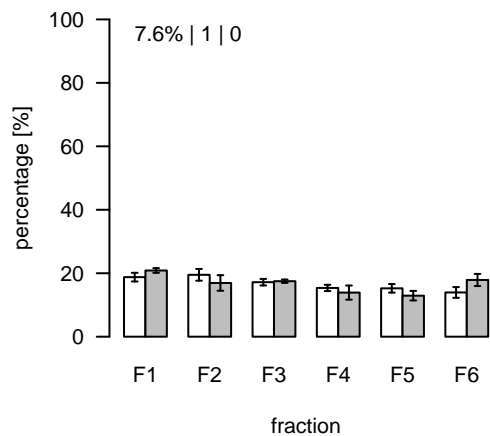

**L2734 (m/z=1071.353528; rt=16.45389)**  
T/S Cluster: L-16.5-2

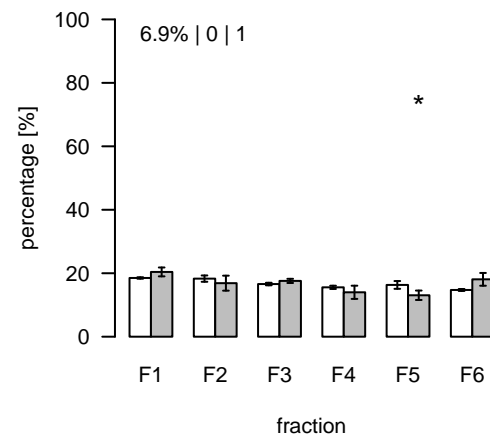

**L2736 (m/z=1069.355099; rt=16.45457)**  
T/S Cluster: L-16.5-2

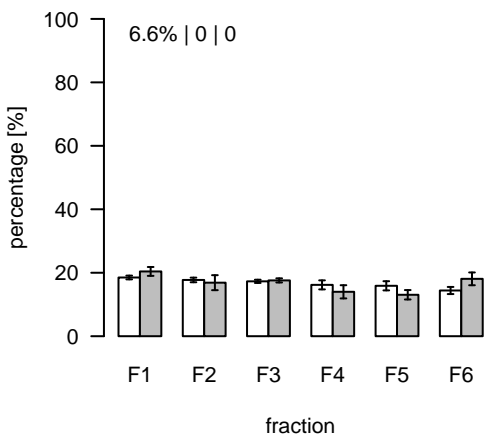

**L2737 (m/z=1070.353916; rt=16.45466)**  
T/S Cluster: L-16.5-2

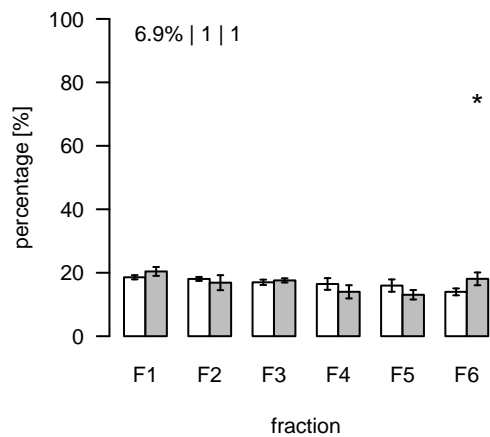

**L2735 (m/z=1068.353931; rt=16.45443)**  
T/S Cluster: L-16.5-2

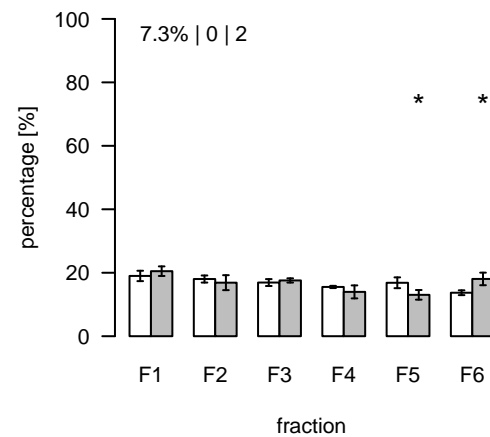

**L2738 (m/z=908.86742; rt=16.52648)**  
T/S Cluster: L-16.5-3

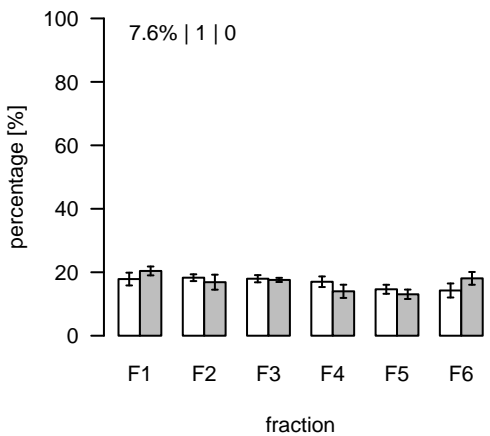

**L2740 (m/z=934.883015; rt=16.54327)**  
T/S Cluster: L-16.5-3

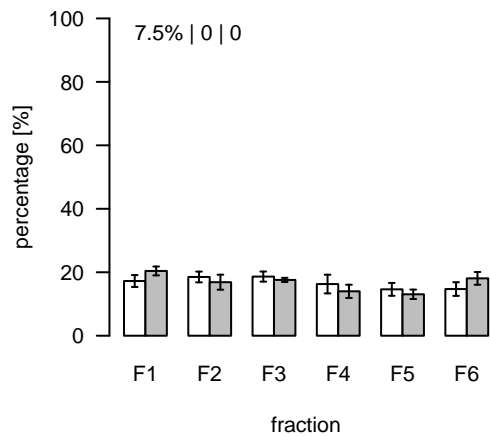

**L2739 (m/z=935.886376; rt=16.5422)**  
T/S Cluster: L-16.5-4

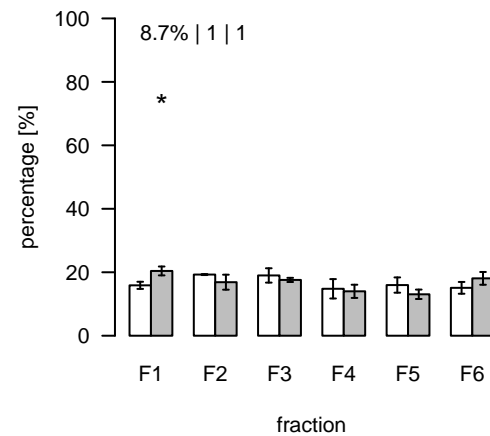

**L2741 (m/z=960.895814; rt=16.54507)**  
T/S Cluster: L-16.5-5

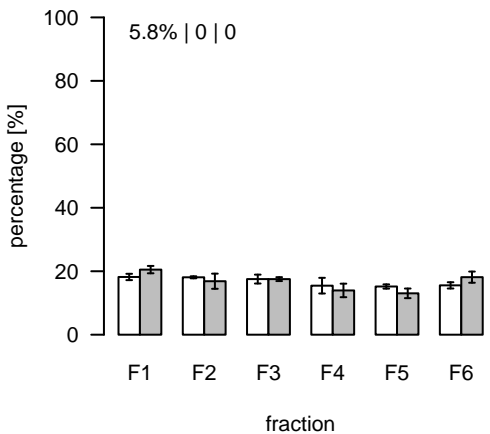

**L2753 (m/z=1129.324232; rt=16.54773)**  
T/S Cluster: L-16.5-6

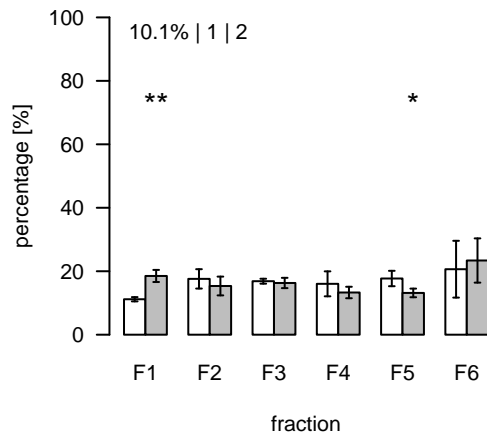

**L2752 (m/z=1130.323149; rt=16.54769)**  
T/S Cluster: L-16.5-6

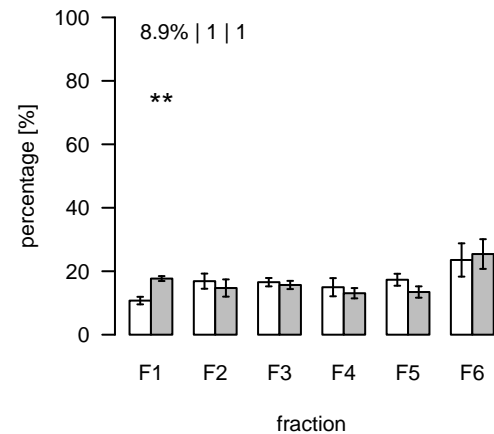

**L2758 (m/z=1128.326137; rt=16.54791)**  
T/S Cluster: L-16.5-6

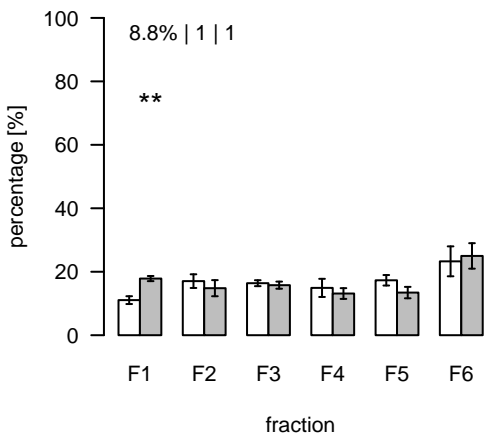

**L2756 (m/z=1130.28231; rt=16.54778)**  
T/S Cluster: L-16.5-6

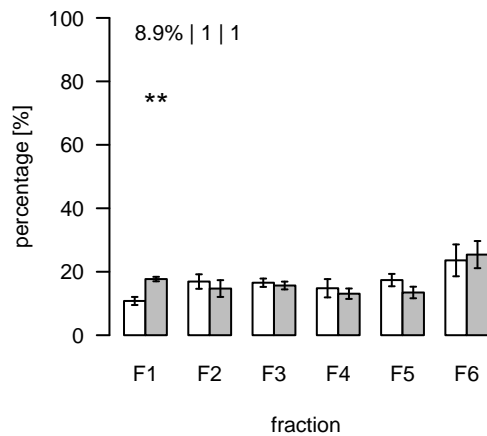

**L2759 (m/z=1128.276334; rt=16.54795)**  
T/S Cluster: L-16.5-6

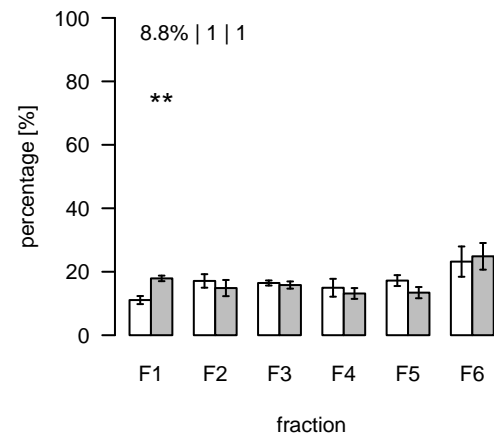

**L2754 (m/z=1131.325732; rt=16.54775)**  
T/S Cluster: L-16.5-6

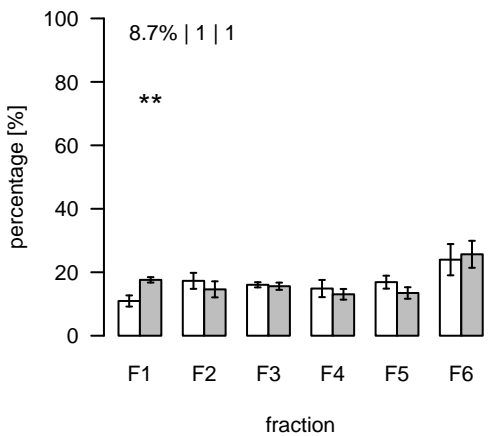

**L2755 (m/z=1129.26618; rt=16.54777)**  
T/S Cluster: L-16.5-6

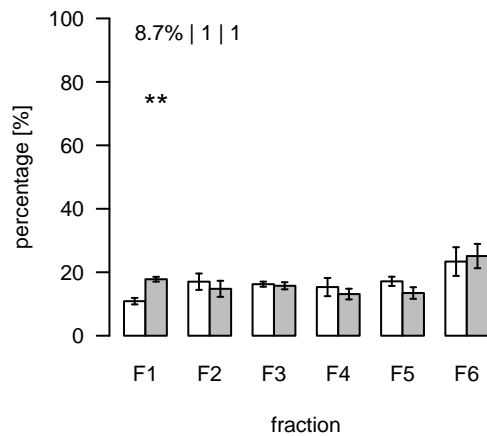

**L2751 (m/z=1131.276247; rt=16.54768)**  
T/S Cluster: L-16.5-6

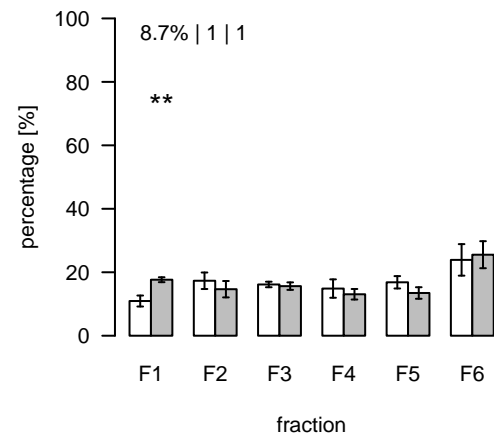



**L2749 (m/z=1132.320772; rt=16.54732)**  
T/S Cluster: L-16.5-6

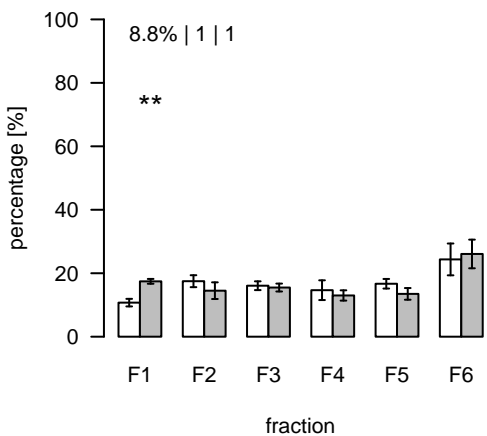

**L2761 (m/z=1171.348288; rt=16.54812)**  
T/S Cluster: L-16.5-6

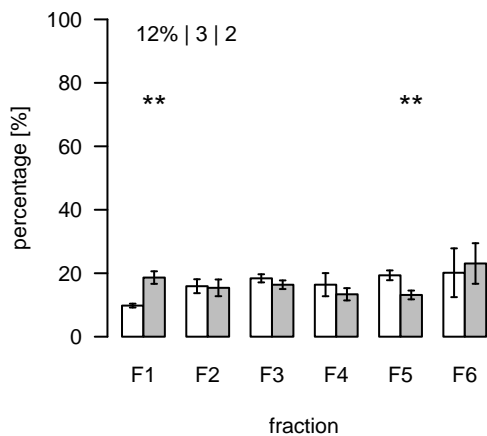

**L2760 (m/z=1170.348929; rt=16.54806)**  
T/S Cluster: L-16.5-6

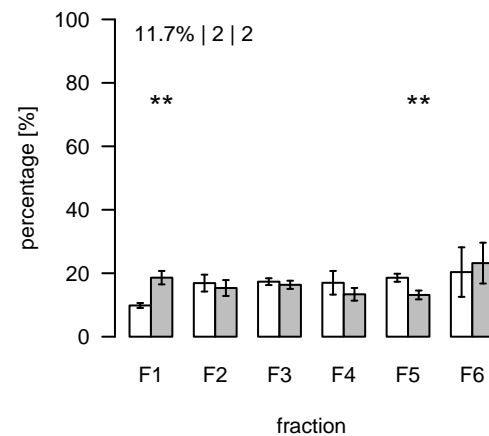

**L2757 (m/z=1172.346985; rt=16.54789)**  
T/S Cluster: L-16.5-6

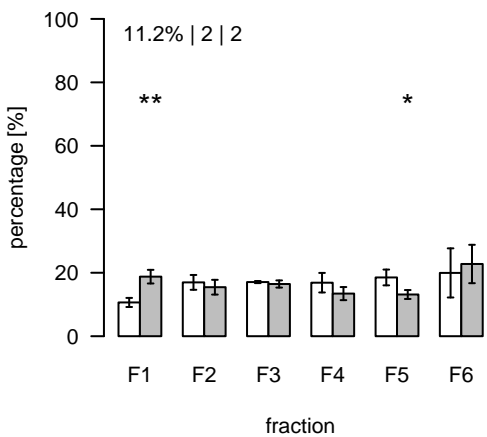

**L2747 (m/z=1133.320727; rt=16.54707)**  
T/S Cluster: L-16.5-6

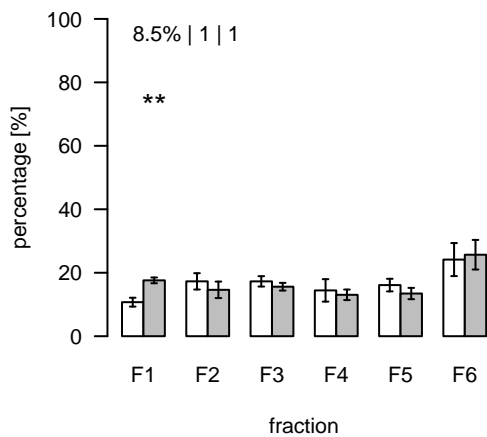

**L2750 (m/z=1173.346117; rt=16.54767)**  
T/S Cluster: L-16.5-6

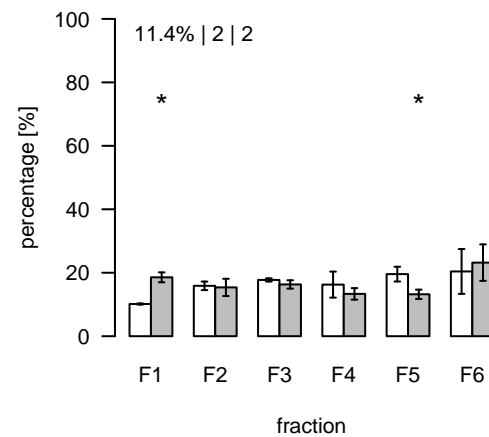

**L2748 (m/z=1169.349009; rt=16.54732)**  
T/S Cluster: L-16.5-6

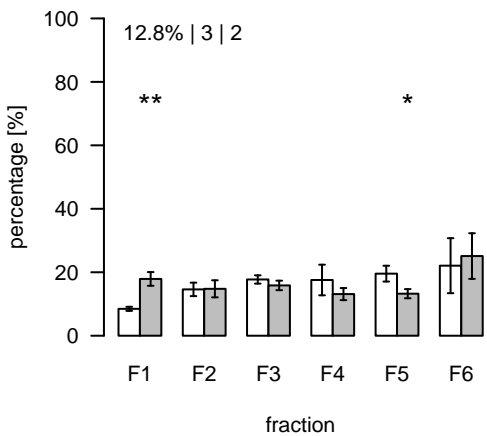

**L2746 (m/z=564.663591; rt=16.54695)**  
T/S Cluster: L-16.5-6

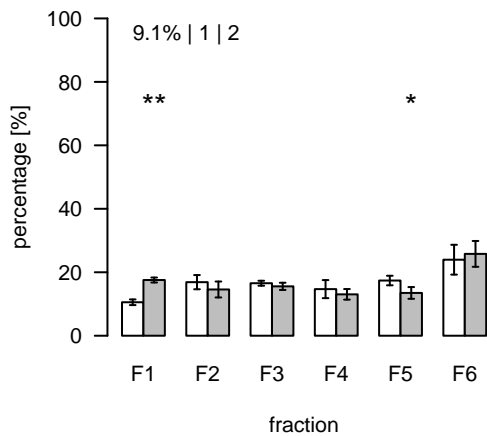

**L2743 (m/z=565.162984; rt=16.54648)**  
T/S Cluster: L-16.5-6

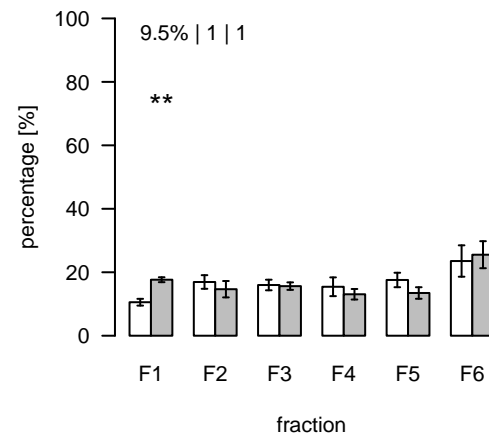

**L2744 (m/z=564.163418; rt=16.54654)**  
T/S Cluster: L-16.5-6

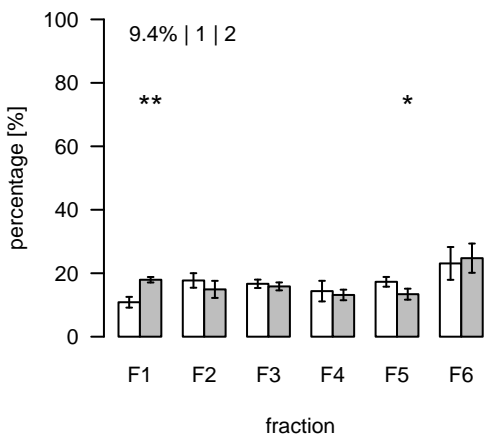

**L2745 (m/z=1134.319962; rt=16.54662)**  
T/S Cluster: L-16.5-6

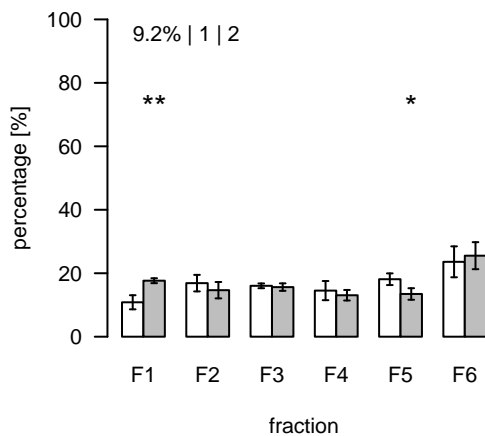

**L2742 (m/z=565.663032; rt=16.54628)**  
T/S Cluster: L-16.5-6

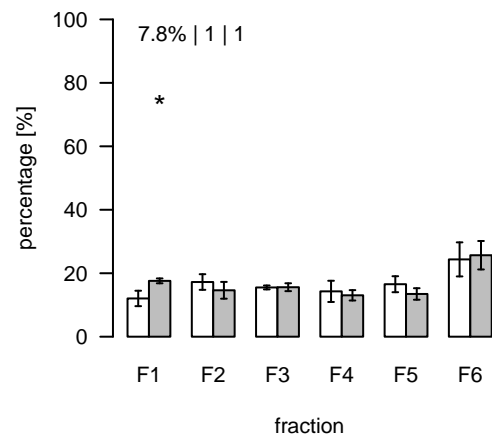

**L2762 (m/z=948.898537; rt=16.66254)**  
T/S Cluster: L-16.7-1

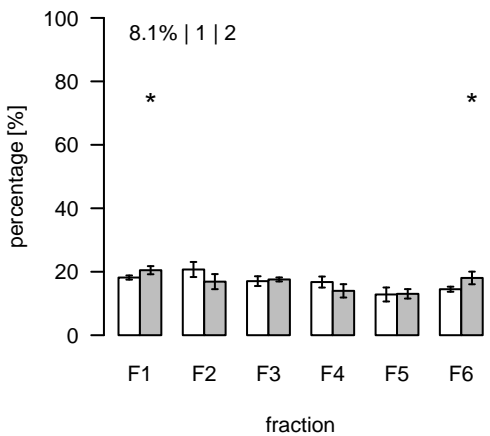

**L2763 (m/z=962.914094; rt=16.78485)**  
T/S Cluster: L-16.8-1

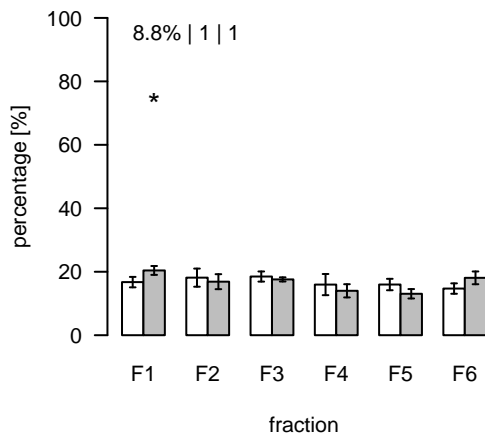

**L2764 (m/z=1202.342728; rt=16.94491)**  
T/S Cluster: L-16.9-1

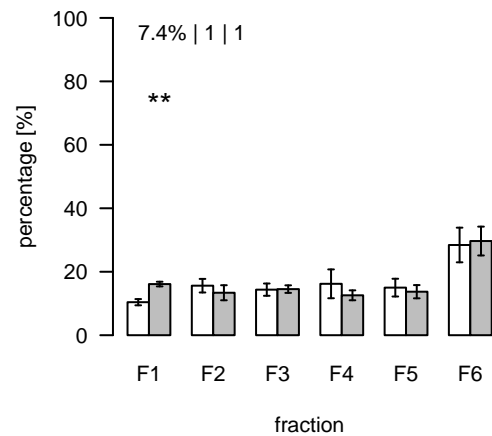

**L2765 (m/z=1243.369687; rt=16.96444)**  
T/S Cluster: L-17-1

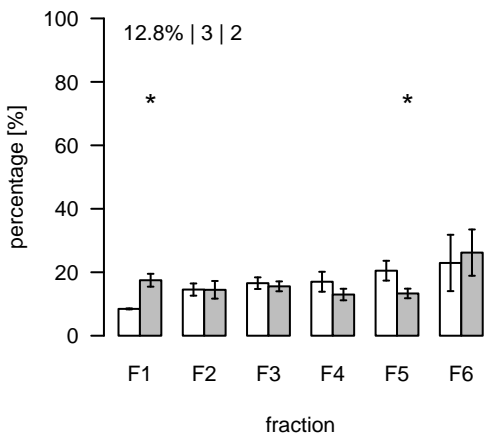

**L2778 (m/z=1204.345603; rt=16.96599)**  
T/S Cluster: L-17-2

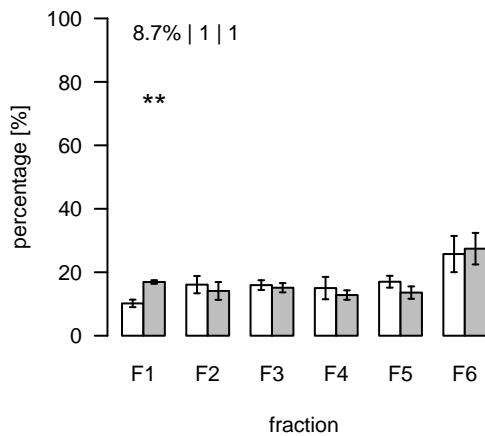

**L2780 (m/z=1203.350595; rt=16.96601)**  
T/S Cluster: L-17-2

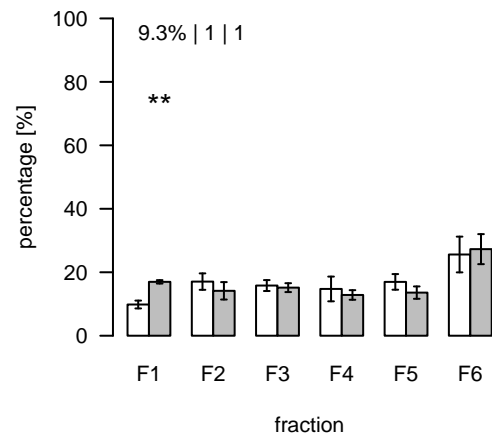

**L2779 (m/z=1203.298756; rt=16.966)**  
T/S Cluster: L-17-2

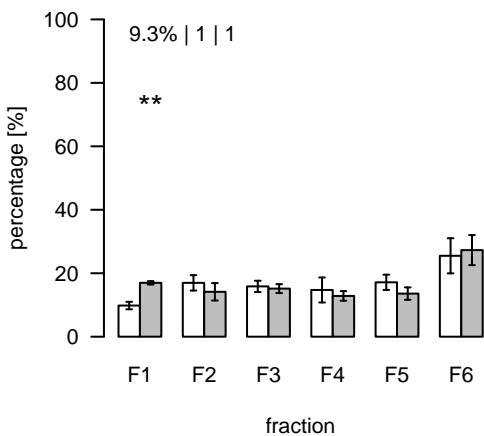

**L2773 (m/z=1205.349872; rt=16.96571)**  
T/S Cluster: L-17-2

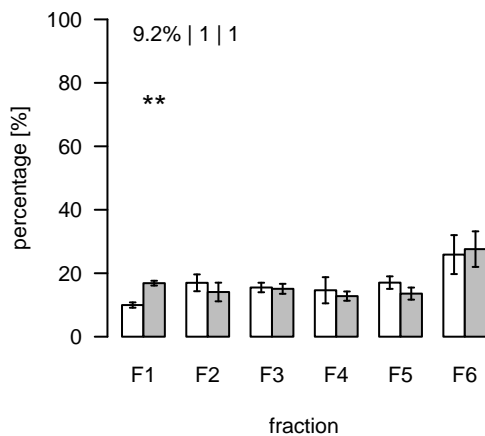

**L2775 (m/z=1202.346037; rt=16.96587)**  
T/S Cluster: L-17-2

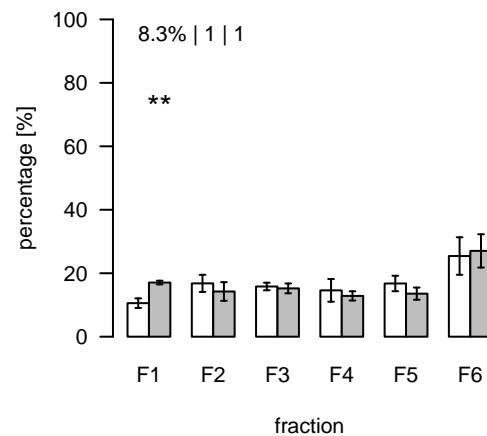

**L2776 (m/z=1204.284486; rt=16.96595)**  
T/S Cluster: L-17-2

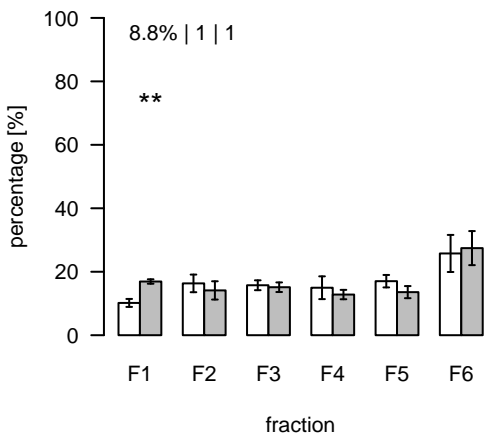

**L2772 (m/z=1205.300515; rt=16.96565)**  
T/S Cluster: L-17-2

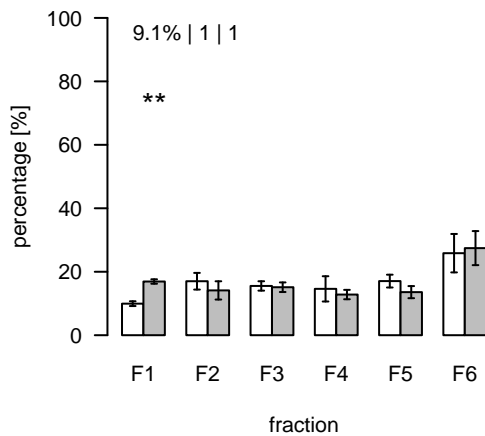

**L2774 (m/z=1202.285786; rt=16.96584)**  
T/S Cluster: L-17-2

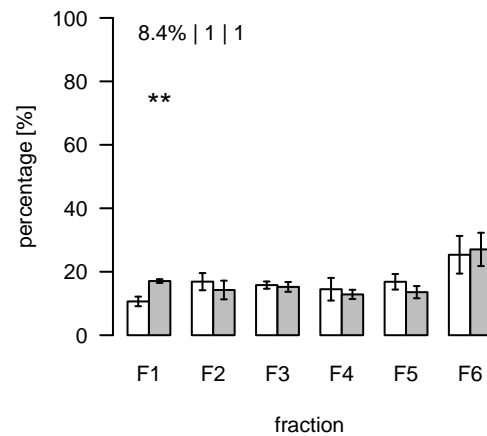

**L2771 (m/z=1206.341835; rt=16.96556)**  
T/S Cluster: L-17-2

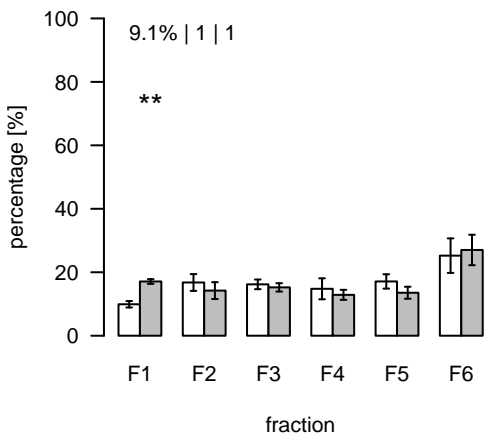

**L2781 (m/z=1245.368261; rt=16.96602)**  
T/S Cluster: L-17-2

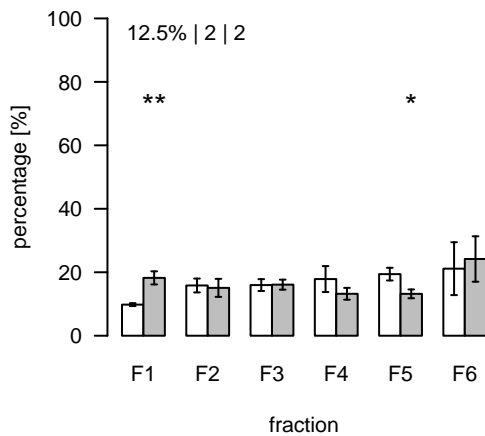

**L2770 (m/z=1246.36783; rt=16.96538)**  
T/S Cluster: L-17-2

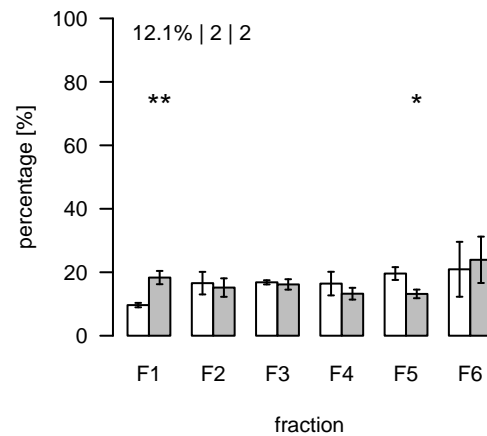

**L2777 (m/z=1244.369564; rt=16.96598)**  
T/S Cluster: L-17-2

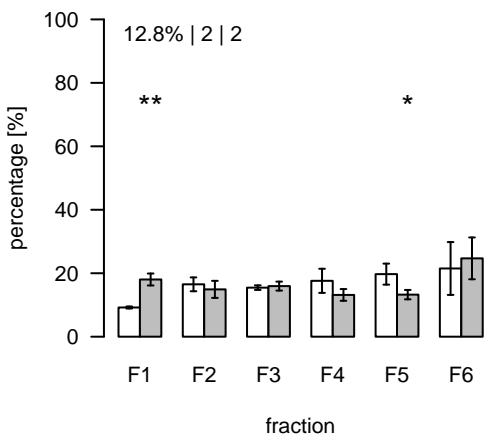

**L2769 (m/z=1247.366785; rt=16.9653)**  
T/S Cluster: L-17-2

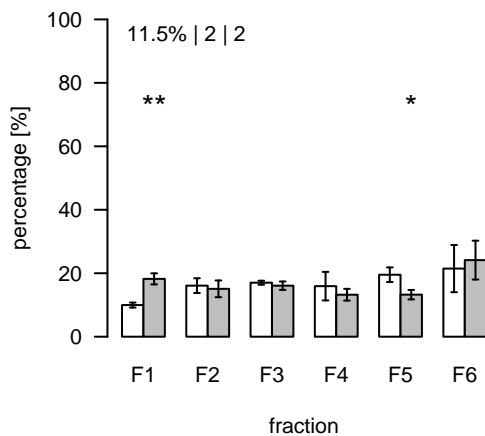

**L2768 (m/z=1207.341596; rt=16.96495)**  
T/S Cluster: L-17-2

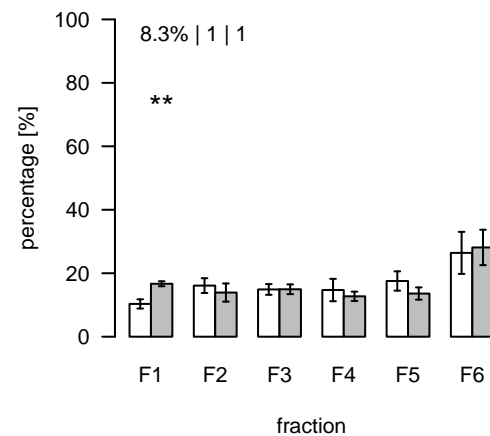

**L2766 (m/z=602.173698; rt=16.96448)**  
T/S Cluster: L-17-2

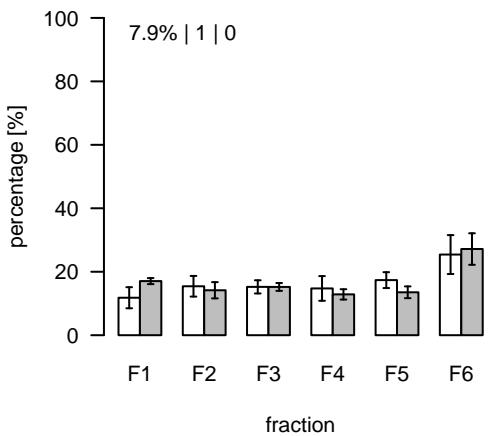

**L2767 (m/z=601.674221; rt=16.96478)**  
T/S Cluster: L-17-2

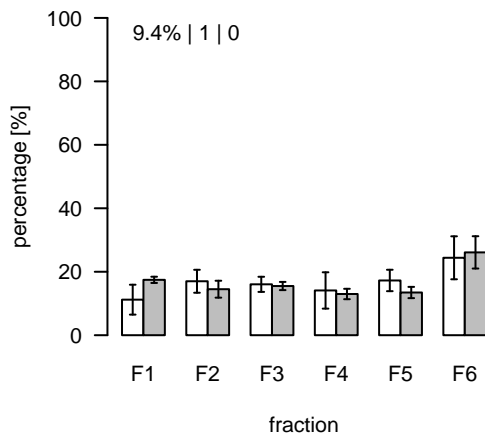

**L2782 (m/z=437.739506; rt=17.02004)**  
T/S Cluster: L-17-3

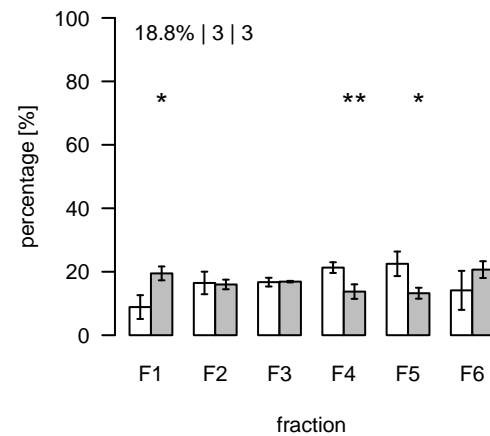

**L2790 (m/z=1277.374997; rt=17.44917)**  
T/S Cluster: L-17.4-1

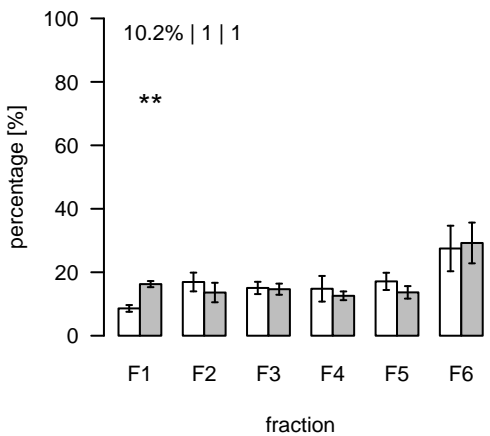

**L2794 (m/z=1278.312958; rt=17.4497)**  
T/S Cluster: L-17.4-1

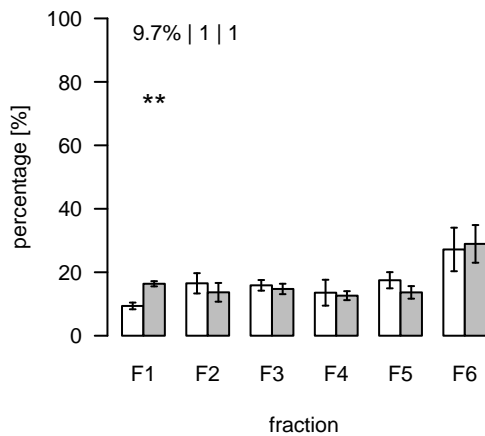

**L2792 (m/z=1276.378974; rt=17.44928)**  
T/S Cluster: L-17.4-1

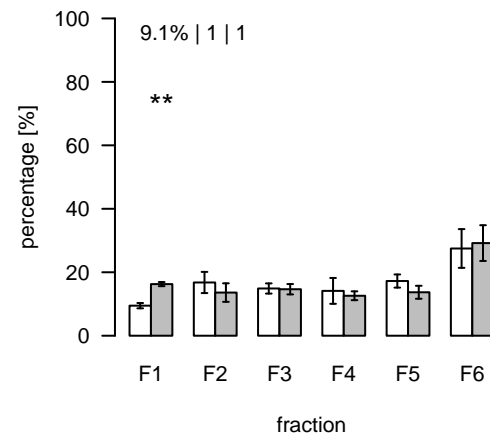

**L2793 (m/z=1276.330256; rt=17.44945)**  
T/S Cluster: L-17.4-1

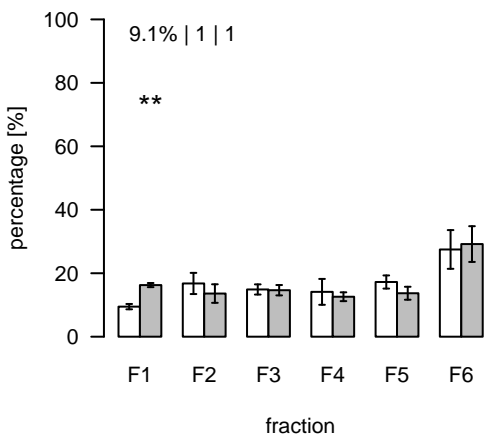

**L2789 (m/z=1277.321876; rt=17.44891)**  
T/S Cluster: L-17.4-1

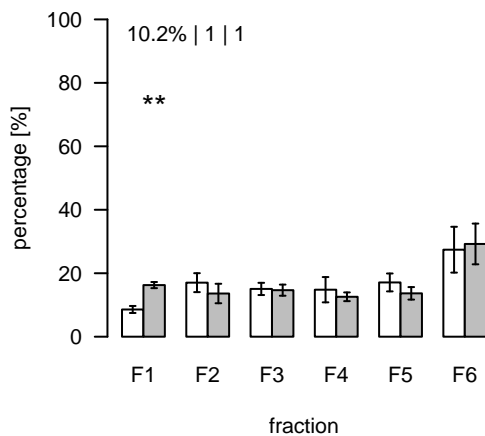

**L2791 (m/z=1279.368008; rt=17.4492)**  
T/S Cluster: L-17.4-1

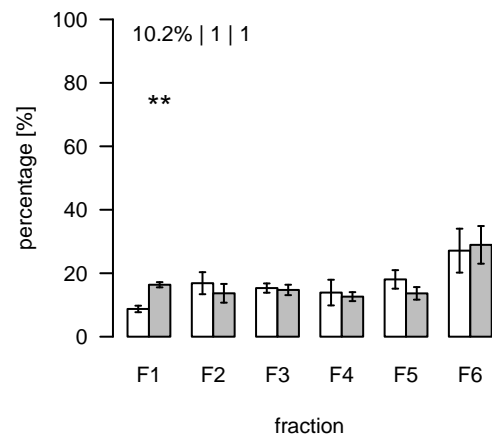

**L2788 (m/z=1279.306124; rt=17.44867)**  
T/S Cluster: L-17.4-1

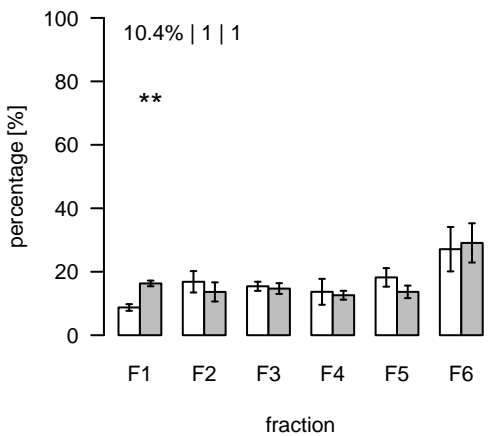

**L2787 (m/z=1280.363527; rt=17.4483)**  
T/S Cluster: L-17.4-1

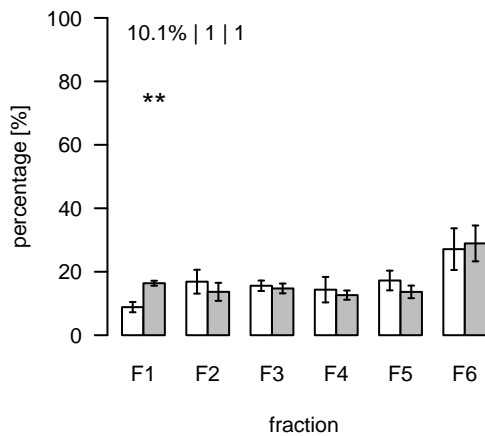

**L2785 (m/z=1319.389697; rt=17.44514)**  
T/S Cluster: L-17.4-1

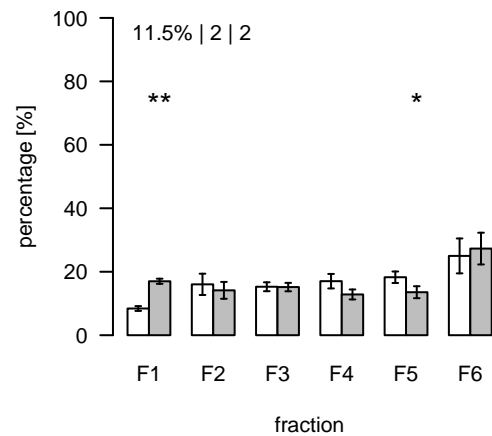

**L2784 (m/z=1320.390019; rt=17.44436)**  
T/S Cluster: L-17.4-1

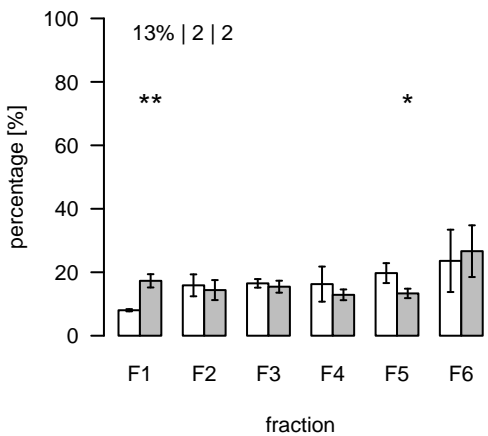

**L2783 (m/z=1318.390093; rt=17.44322)**  
T/S Cluster: L-17.4-1

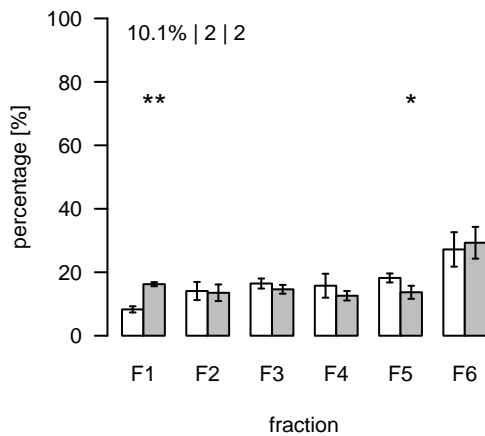

**L2786 (m/z=1281.363369; rt=17.44808)**  
T/S Cluster: L-17.4-1

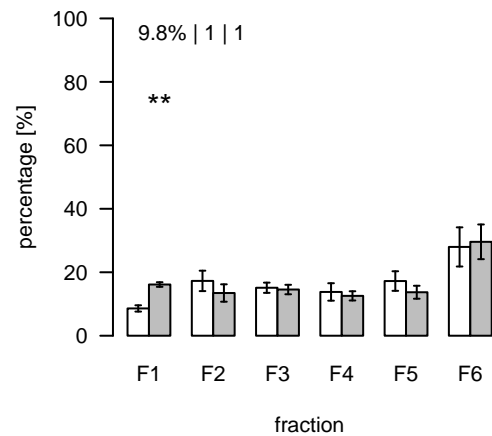

**L2795 (m/z=1278.370756; rt=17.45003)**  
T/S Cluster: L-17.5-1

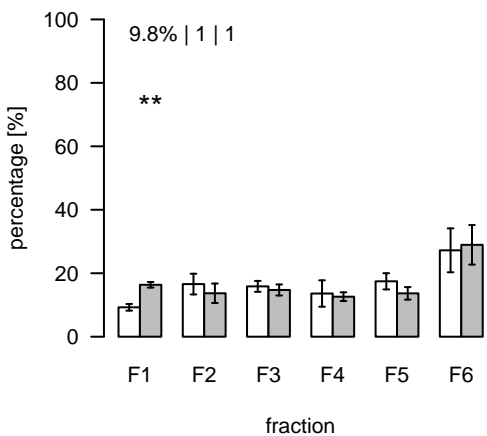

**L2796 (m/z=1164.099886; rt=17.94436)**  
T/S Cluster: L-17.9-1

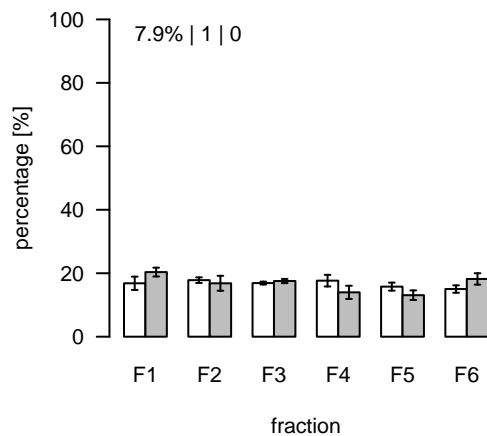

**L2797 (m/z=1163.095004; rt=17.94524)**  
T/S Cluster: L-17.9-2

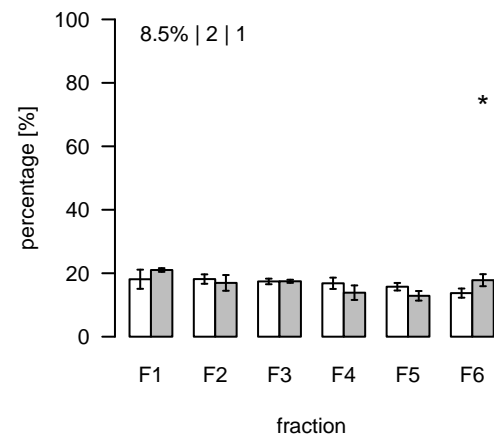

**L2798 (m/z=1352.385961; rt=18.07315)**  
T/S Cluster: L-18.1-1

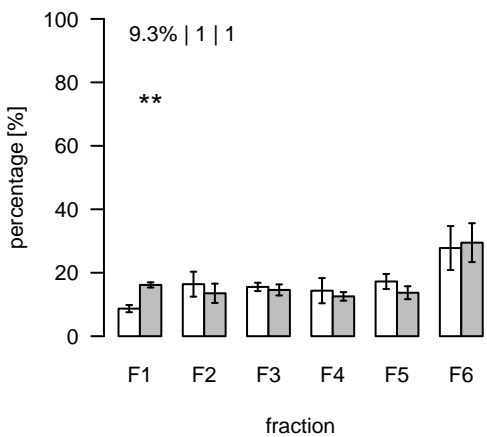

**L2800 (m/z=1351.387937; rt=18.07367)**  
T/S Cluster: L-18.1-1

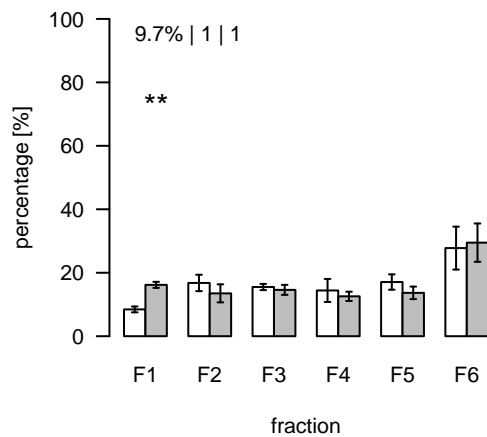

**L2801 (m/z=1353.387303; rt=18.07392)**  
T/S Cluster: L-18.1-1

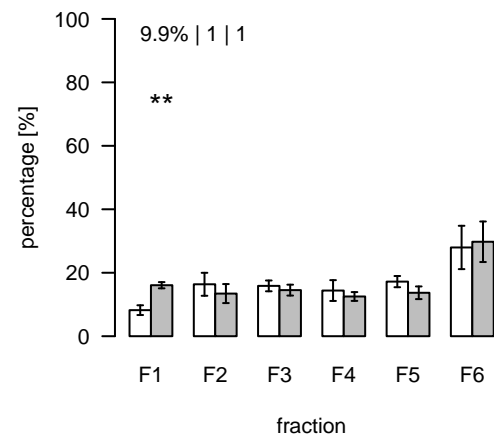

**L2799 (m/z=1350.386176; rt=18.07326)**  
T/S Cluster: L-18.1-1

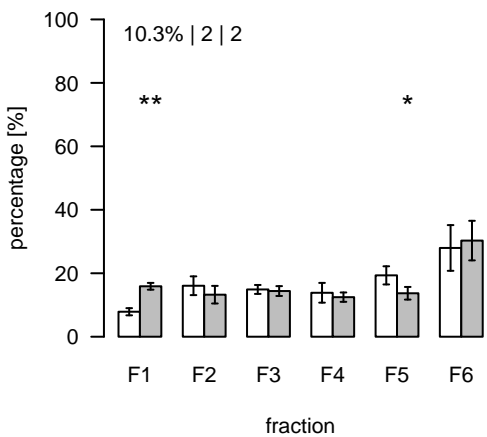

**L2802 (m/z=1354.386521; rt=18.07501)**  
T/S Cluster: L-18.1-1

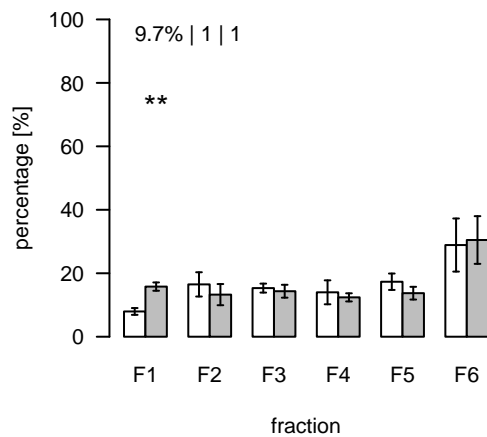

**L2803 (m/z=1192.1306; rt=18.4148)**  
T/S Cluster: L-18.4-1

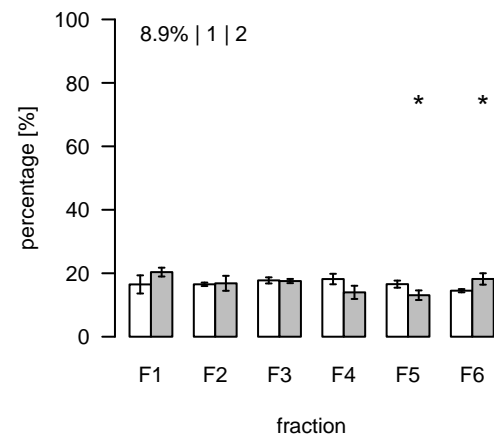

**L2804 (m/z=1191.127696; rt=18.41561)**  
T/S Cluster: L-18.4-2

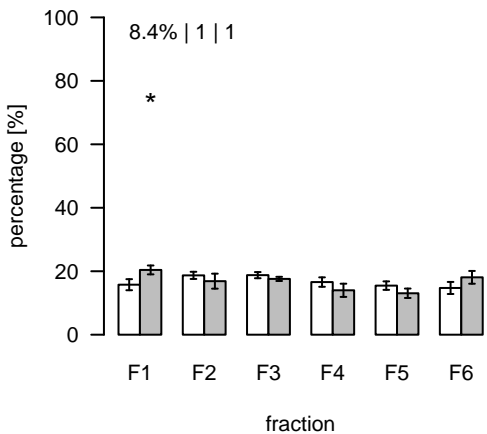

**cysteine**

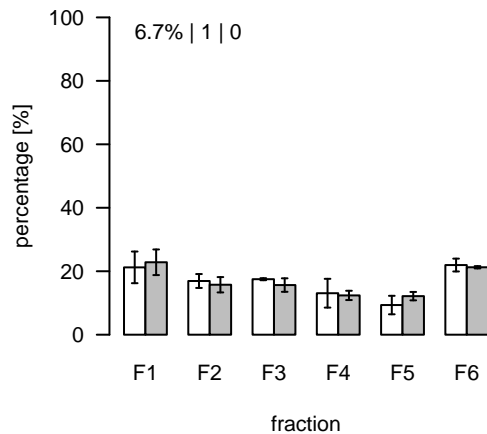

**g-glutamylcysteine**

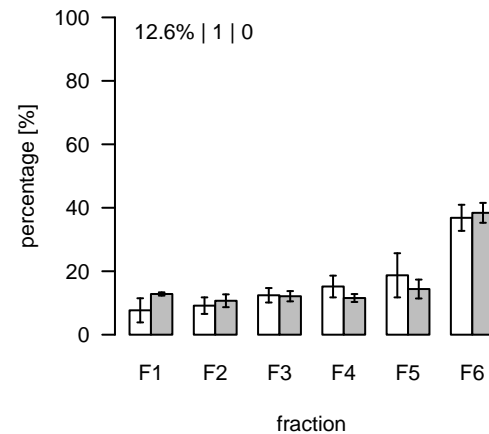

**glutathione**

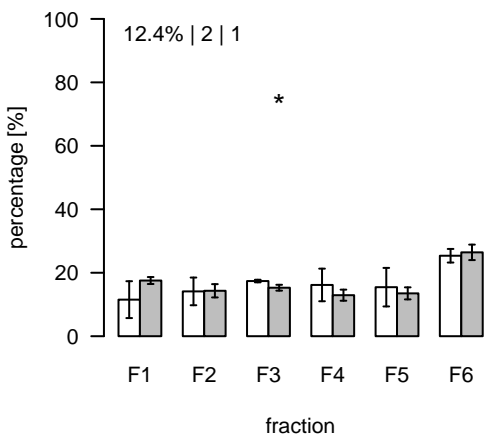

**chlorophyll (cpl.)**

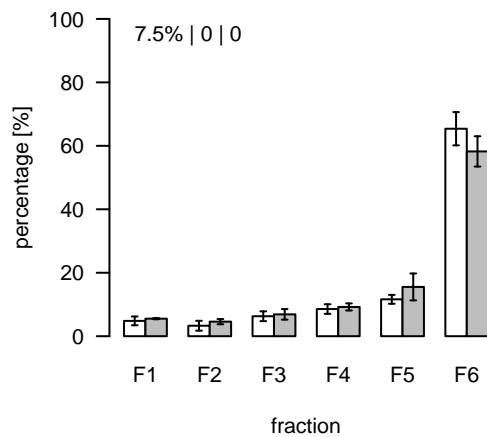

**citrate synthase (mit.)**

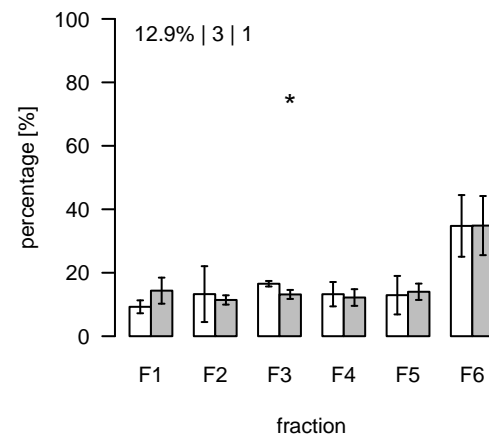

**S1 (m/z=437.77124; rt=0.40646)**  
T/S Cluster: S-0.4-1

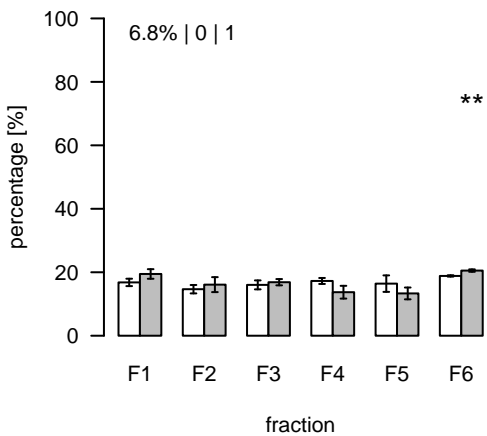

**S2 (m/z=437.739853; rt=0.46198)**  
T/S Cluster: S-0.5-1

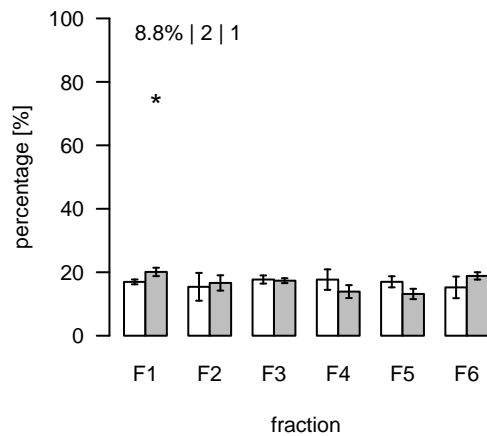

**S3 (m/z=437.773809; rt=0.68232)**  
T/S Cluster: S-0.7-1

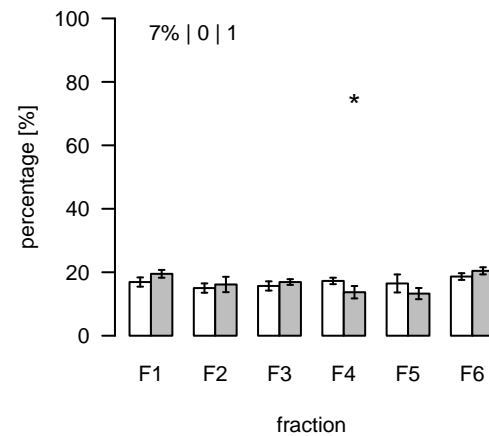

**S4 (m/z=222.289788; rt=0.86786)**  
T/S Cluster: S-0.9-1

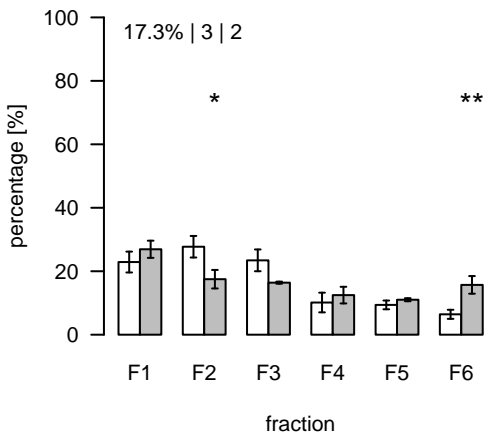

**S5 (m/z=437.790096; rt=0.9975)**  
T/S Cluster: S-1-1

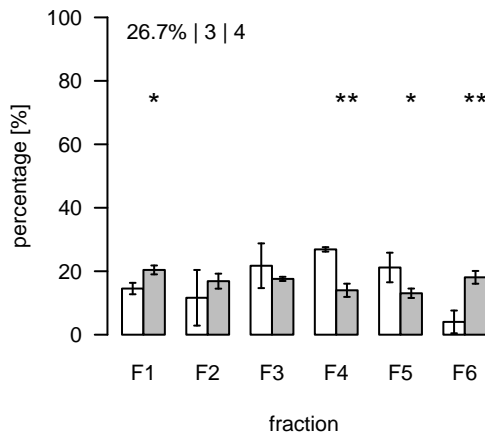

**S9 (m/z=664.119181; rt=1.14933)**  
T/S Cluster: S-1.1-1

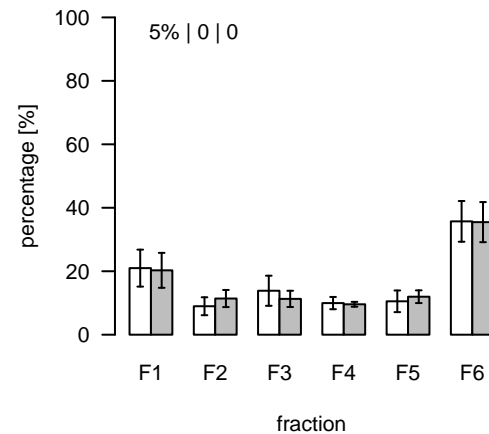

**S8 (m/z=664.087804; rt=1.14812)**  
T/S Cluster: S-1.1-1

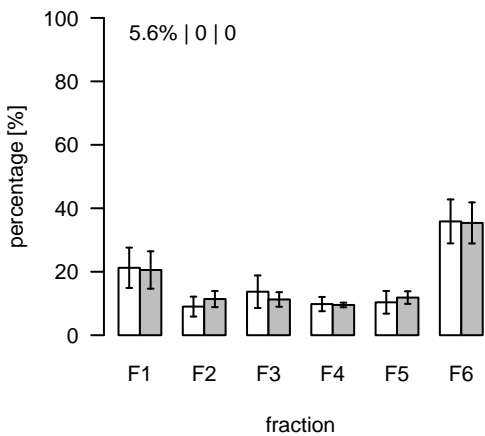

**S6 (m/z=665.122478; rt=1.1478)**  
T/S Cluster: S-1.1-1

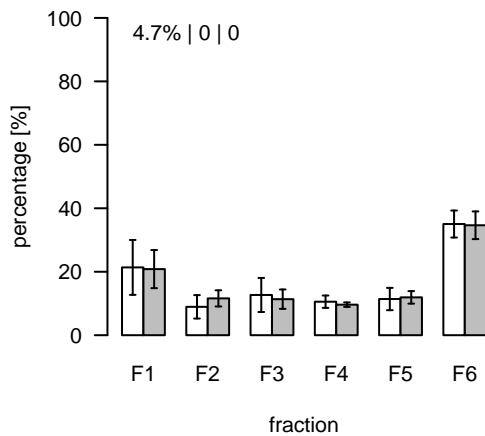

**S7 (m/z=302.135194; rt=1.14793)**  
T/S Cluster: S-1.1-2

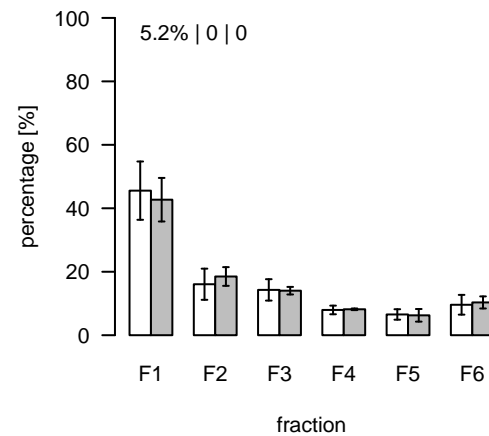

**S10 (m/z=455.071188; rt=1.16776)**  
T/S Cluster: S-1.2-1

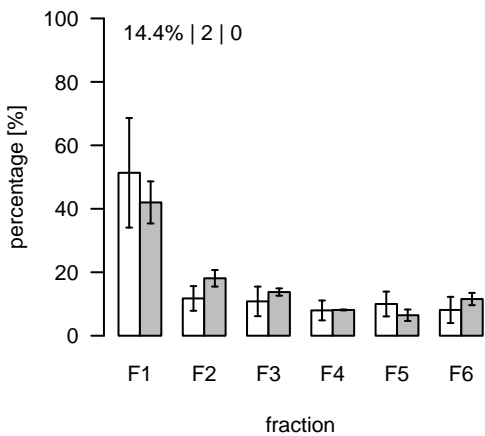

**S11 (m/z=455.083486; rt=1.2086)**  
T/S Cluster: S-1.2-2

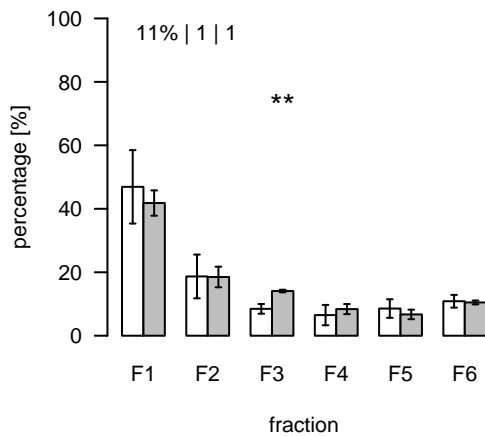

**S12 (m/z=437.771517; rt=1.26495)**  
T/S Cluster: S-1.3-1

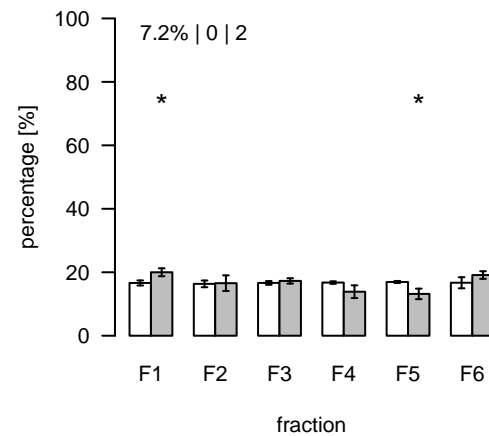



**S13 (m/z=437.74301; rt=1.28657)**  
T/S Cluster: S-1.3-2

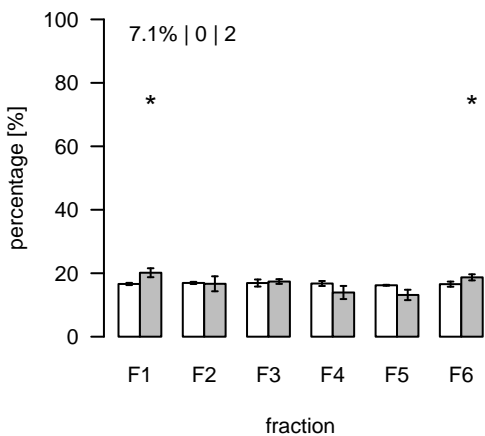

**S14 (m/z=437.78932; rt=1.38364)**  
T/S Cluster: S-1.4-1

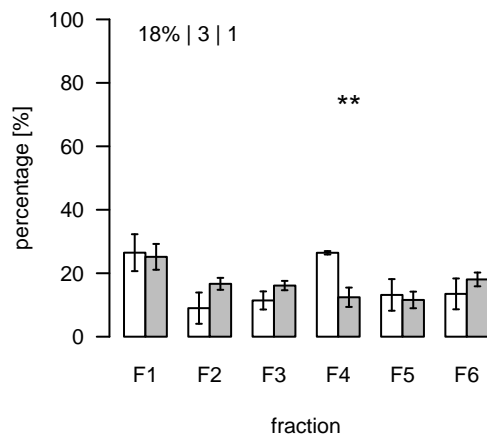

**S18 (m/z=214.090013; rt=1.63838)**  
T/S Cluster: S-1.6-1

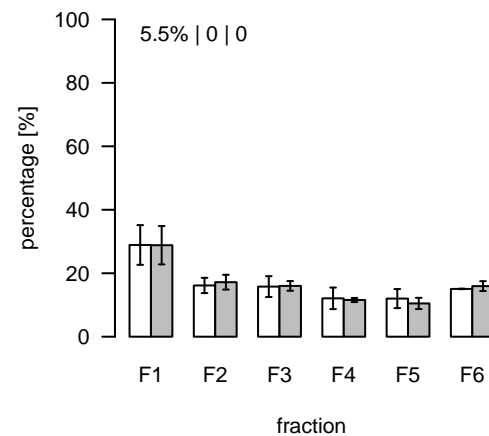

**S16 (m/z=469.099402; rt=1.60204)**  
T/S Cluster: S-1.6-1

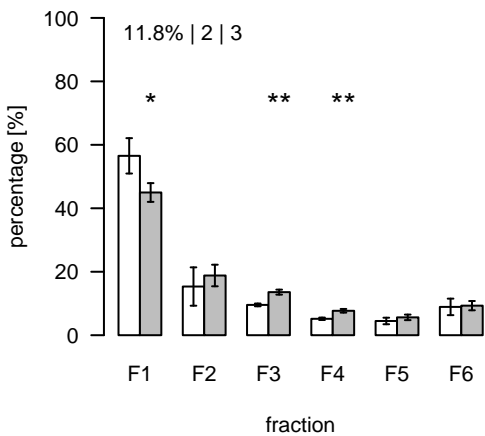

**S15 (m/z=469.079657; rt=1.59741)**  
T/S Cluster: S-1.6-1

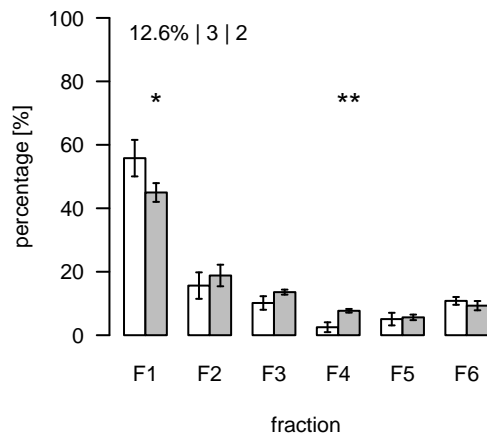

**S17 (m/z=231.116489; rt=1.62613)**  
T/S Cluster: S-1.6-2

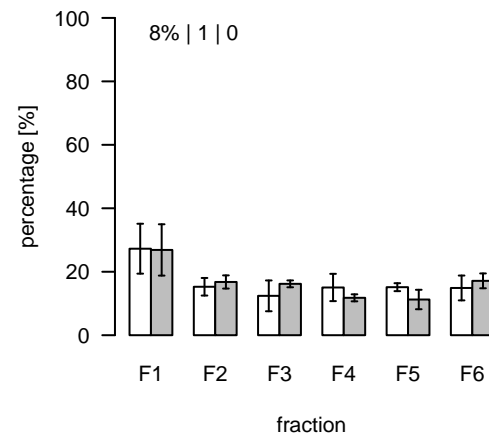

**S19 (m/z=437.776421; rt=2.13766)**  
T/S Cluster: S-2.1-1

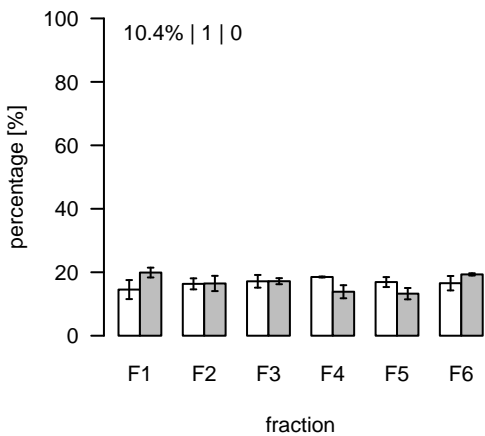

**S21 (m/z=146.063461; rt=2.60719)**  
T/S Cluster: S-2.6-1

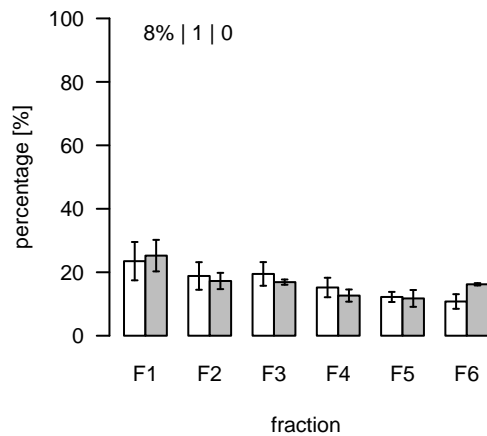

**S20 (m/z=146.062195; rt=2.60686)**  
T/S Cluster: S-2.6-1

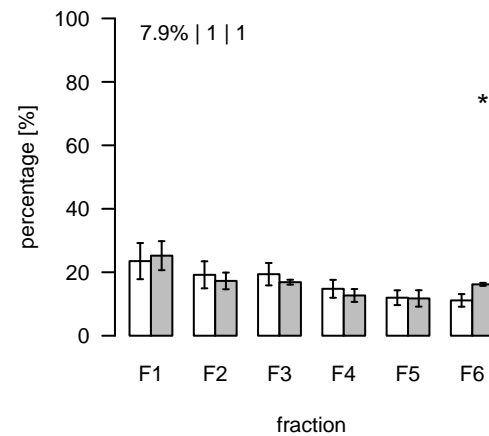

**S22 (m/z=437.74927; rt=2.74676)**  
T/S Cluster: S-2.7-1

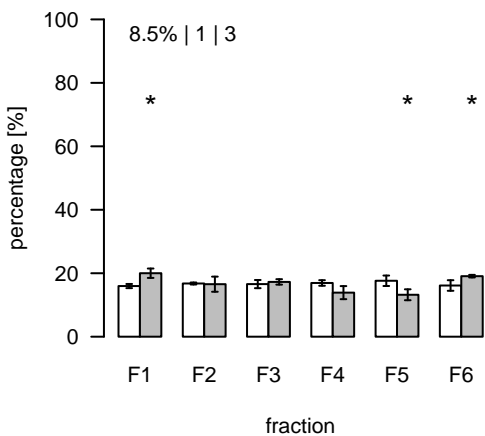

**S23 (m/z=823.886732; rt=3.00757)**  
T/S Cluster: S-3-1

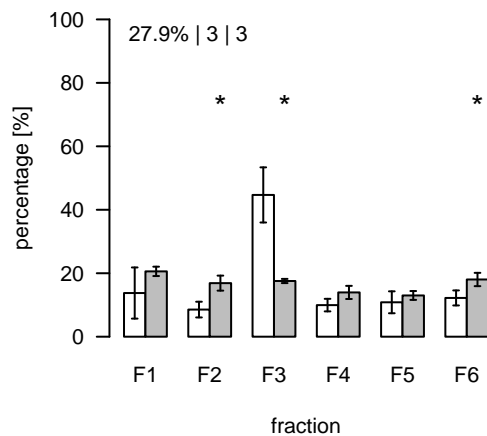

**S24 (m/z=268.104359; rt=3.13672)**  
T/S Cluster: S-3.1-1

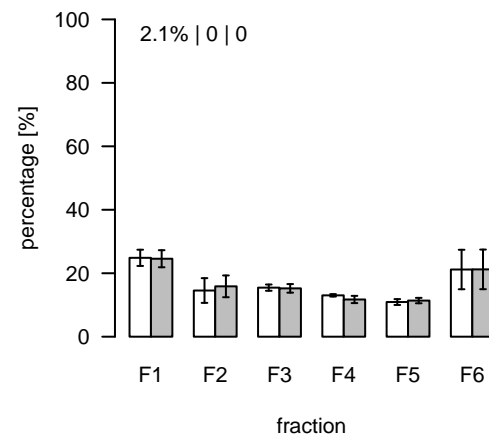

**S25 (m/z=823.875535; rt=3.33539)**  
T/S Cluster: S-3.3-1

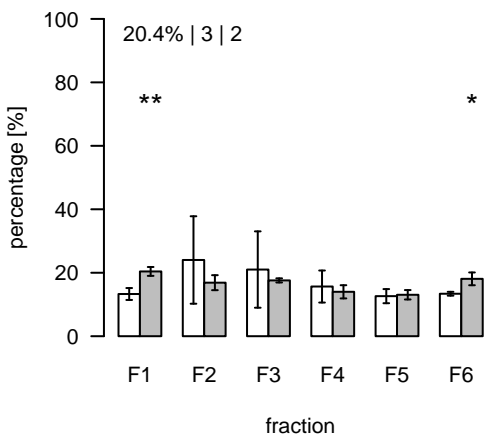

**S26 (m/z=437.77962; rt=3.43017)**  
T/S Cluster: S-3.4-1

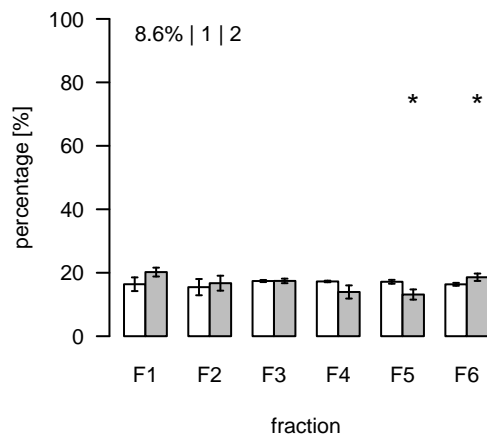

**S27 (m/z=823.901446; rt=3.55838)**  
T/S Cluster: S-3.6-1

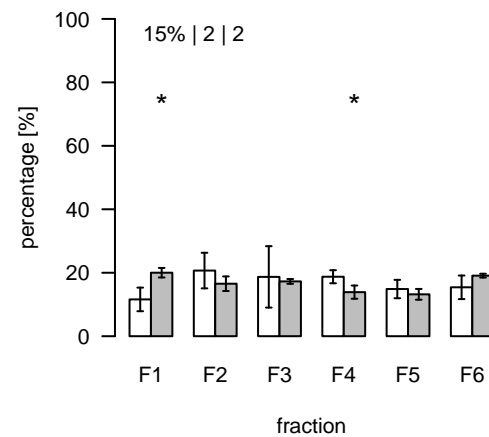

**S28 (m/z=437.758718; rt=3.60429)**  
T/S Cluster: S-3.6-2

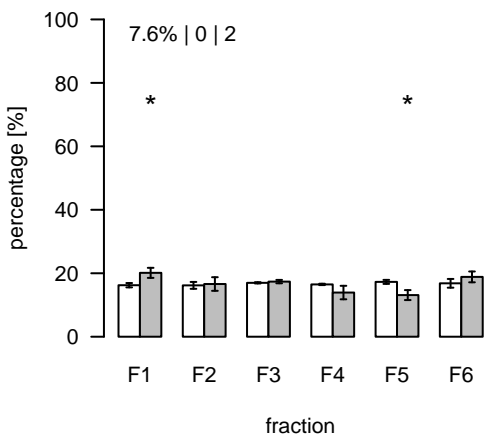

**S30 (m/z=344.098346; rt=3.68445)**  
T/S Cluster: S-3.7-1

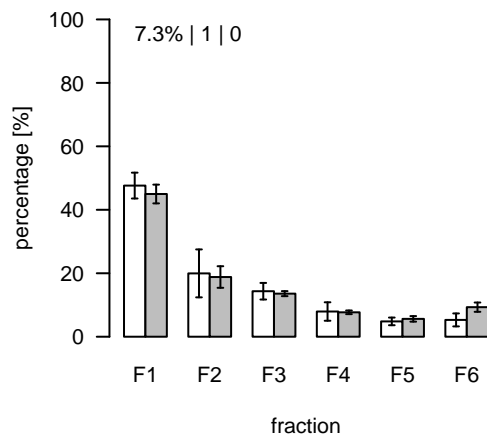

**S33 (m/z=497.130775; rt=3.71976)**  
T/S Cluster: S-3.7-1

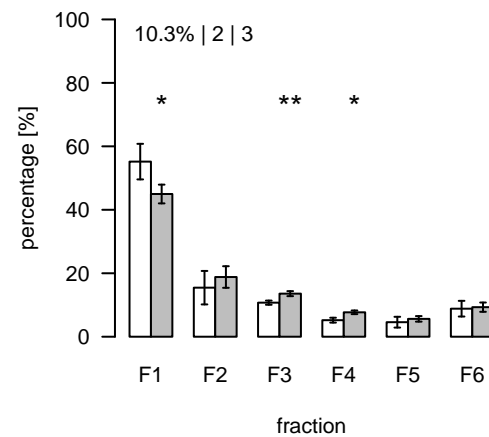

**S29 (m/z=344.089144; rt=3.68243)**  
T/S Cluster: S-3.7-1

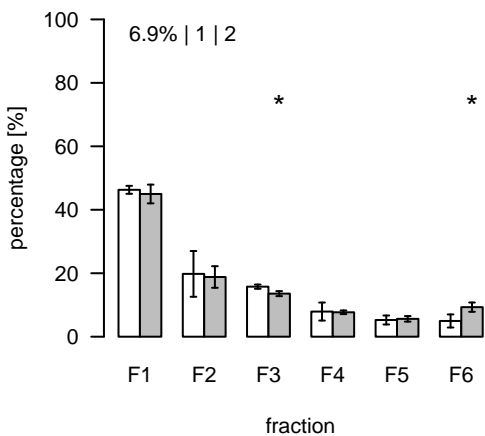

**S32 (m/z=497.111141; rt=3.71849)**  
T/S Cluster: S-3.7-1

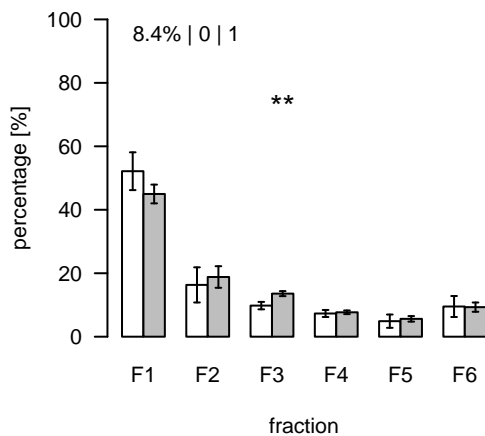

**S31 (m/z=214.089794; rt=3.71214)**  
T/S Cluster: S-3.7-2

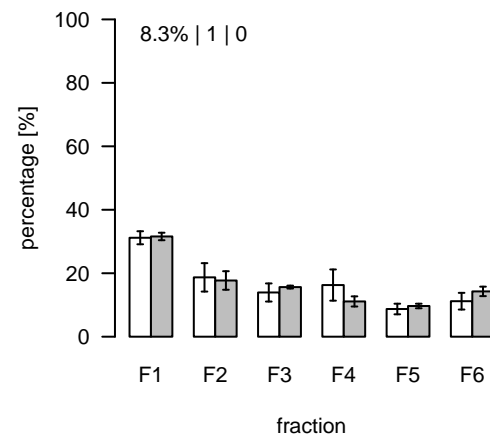

**S34 (m/z=437.73197; rt=3.75694)**  
T/S Cluster: S-3.8-1

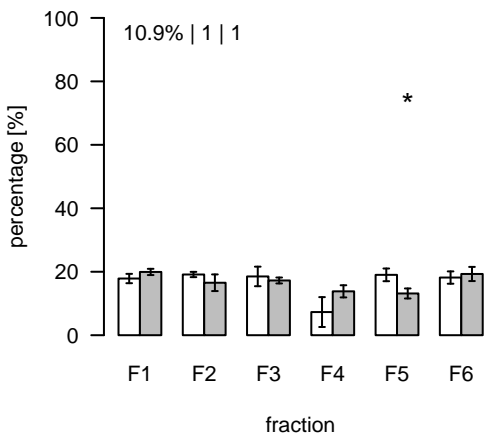

**S35 (m/z=214.089763; rt=4.05278)**  
T/S Cluster: S-4.1-1

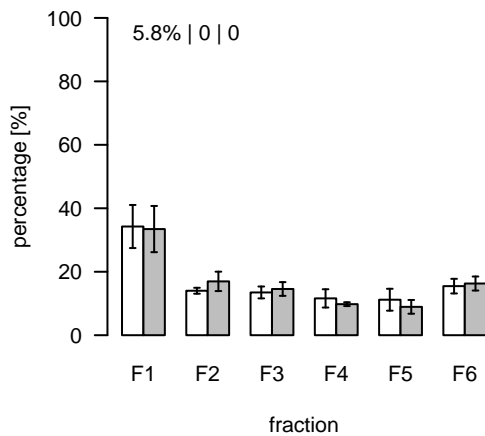

**S40 (m/z=483.122904; rt=4.05861)**  
T/S Cluster: S-4.1-2

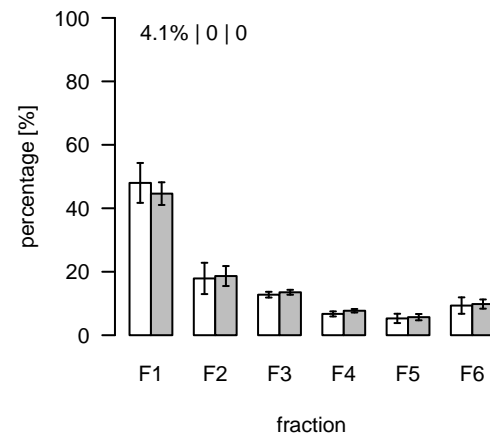

**S41 (m/z=483.122906; rt=4.05862)**  
T/S Cluster: S-4.1-2

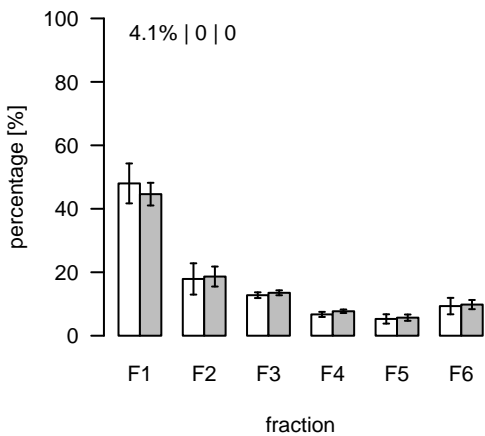

**S44 (m/z=466.096363; rt=4.0588)**  
T/S Cluster: S-4.1-2

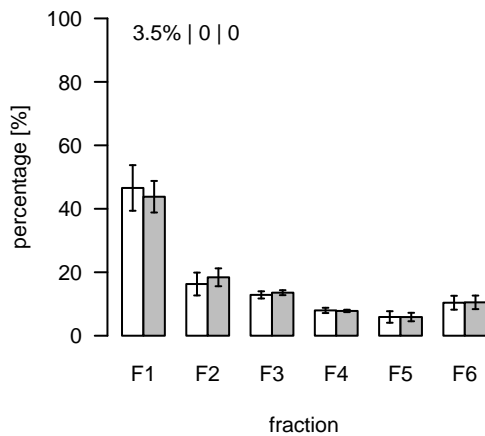

**S39 (m/z=484.126073; rt=4.0585)**  
T/S Cluster: S-4.1-2

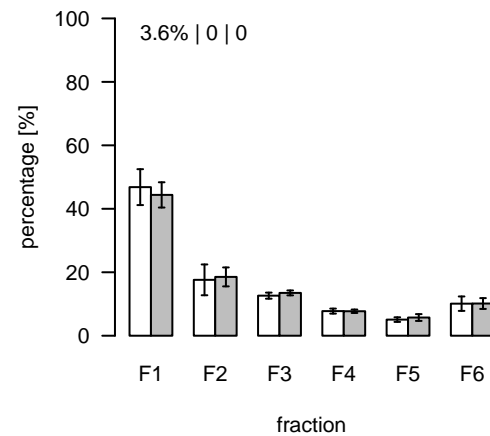

**S37 (m/z=241.56161; rt=4.05827)**  
T/S Cluster: S-4.1-2

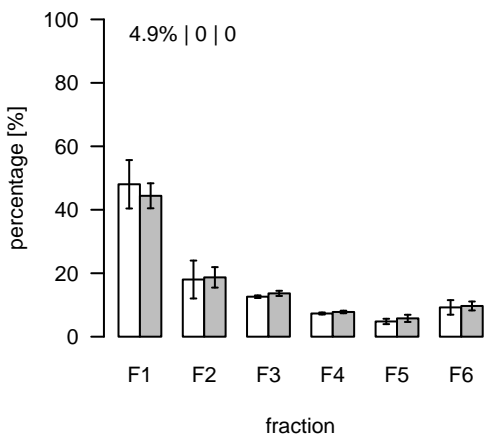

**S45 (m/z=369.112265; rt=4.05904)**  
T/S Cluster: S-4.1-2

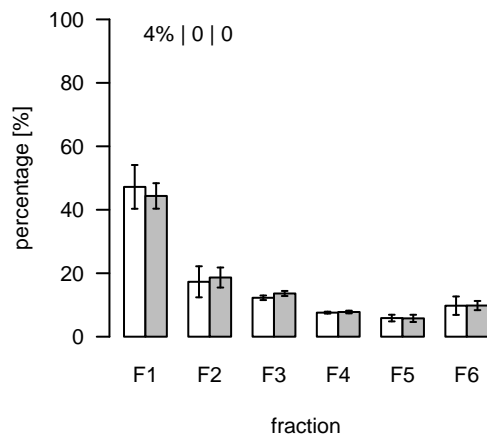

**S43 (m/z=369.104334; rt=4.05878)**  
T/S Cluster: S-4.1-2

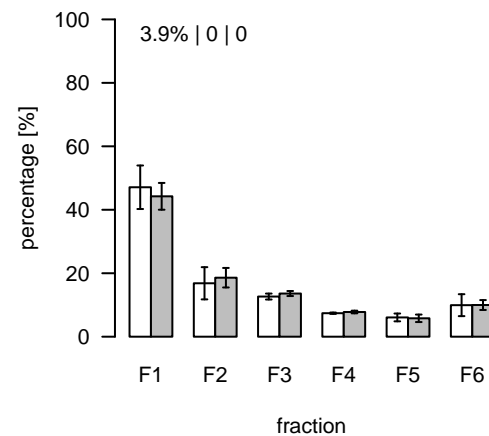

**S38 (m/z=466.082853; rt=4.05839)**  
T/S Cluster: S-4.1-2

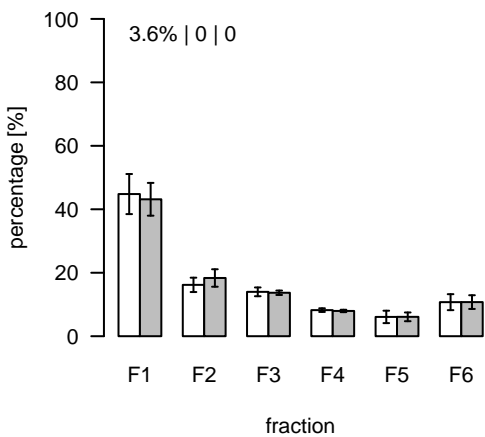

**S36 (m/z=485.116158; rt=4.05656)**  
T/S Cluster: S-4.1-2

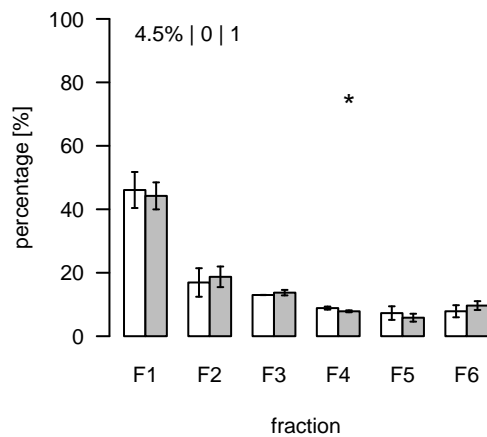

**S42 (m/z=207.058847; rt=4.05867)**  
T/S Cluster: S-4.1-2

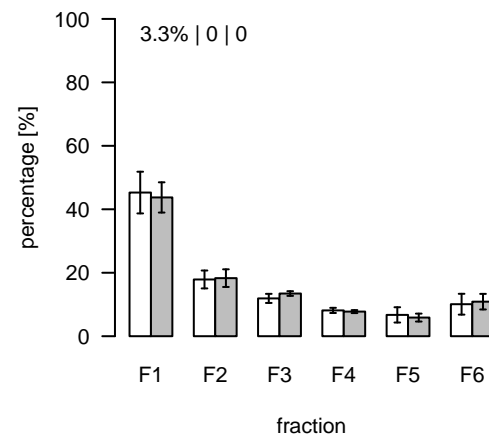

**S46 (m/z=222.296361; rt=4.06603)**  
T/S Cluster: S-4.1-3

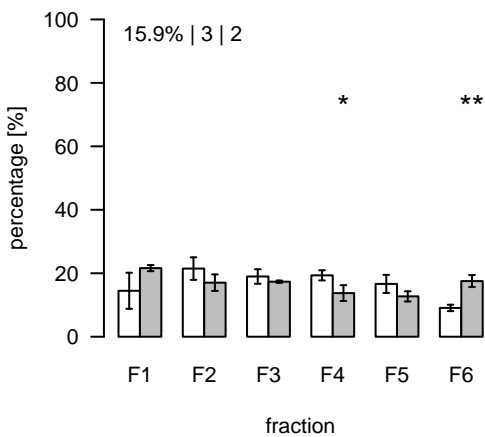

**S47 (m/z=730.169945; rt=4.07357)**  
T/S Cluster: S-4.1-4

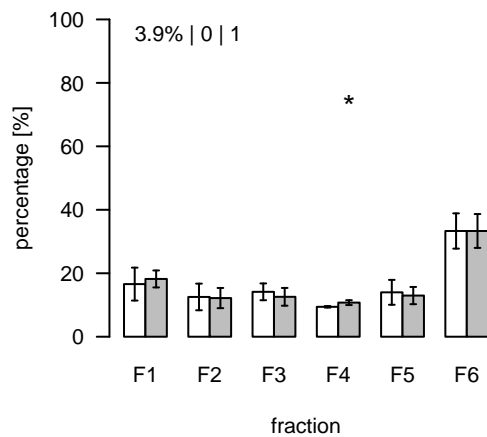

**S48 (m/z=823.772484; rt=4.51623)**  
T/S Cluster: S-4.5-1

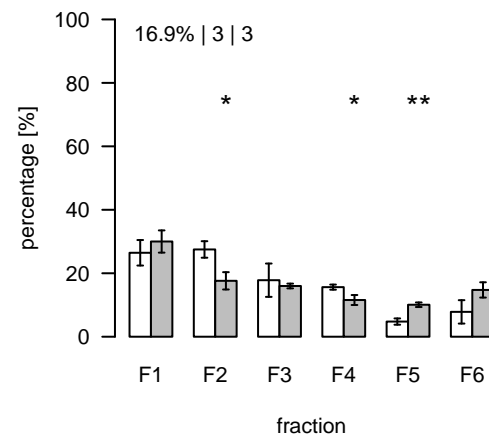

**S49 (m/z=437.792411; rt=4.52949)**  
T/S Cluster: S-4.5-2

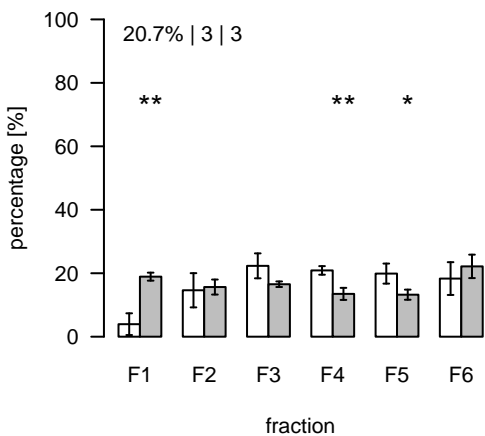

**S60 (m/z=511.146363; rt=4.64591)**  
T/S Cluster: S-4.6-1

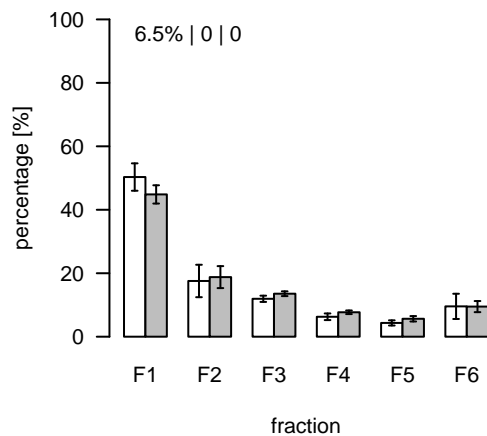

**S59 (m/z=414.162496; rt=4.64571)**  
T/S Cluster: S-4.6-1

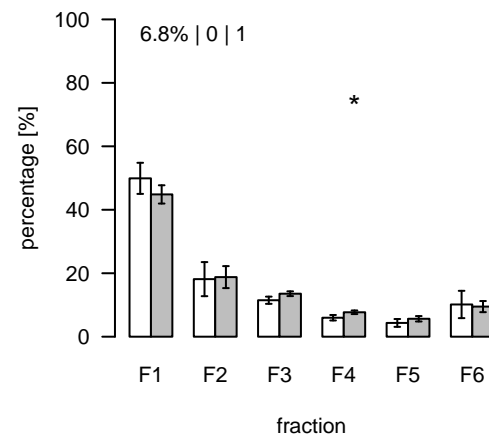

**S55 (m/z=512.149871; rt=4.64532)**  
T/S Cluster: S-4.6-1

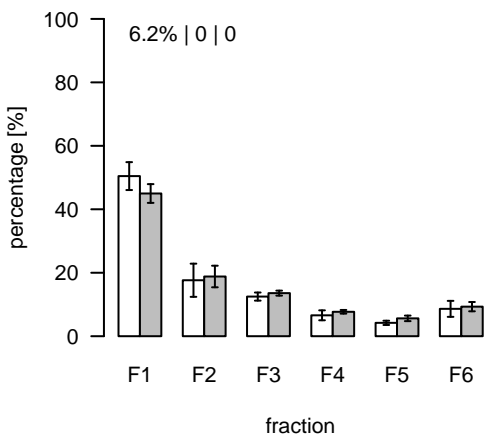

**S61 (m/z=255.573507; rt=4.64605)**  
T/S Cluster: S-4.6-1

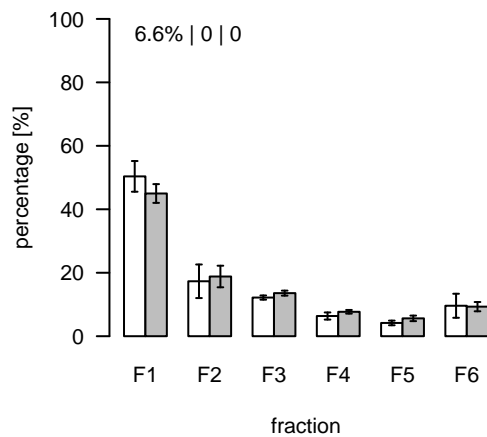

**S51 (m/z=252.109047; rt=4.64249)**  
T/S Cluster: S-4.6-1

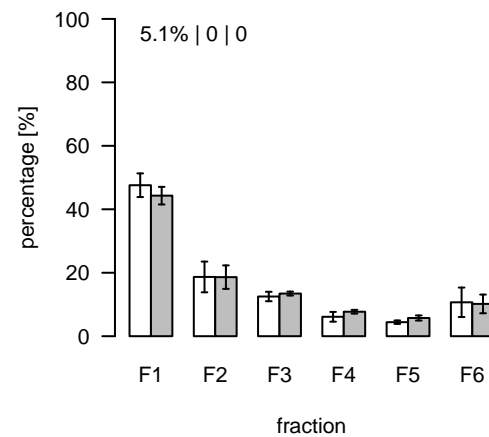

**S57 (m/z=513.141113; rt=4.64567)**  
T/S Cluster: S-4.6-1

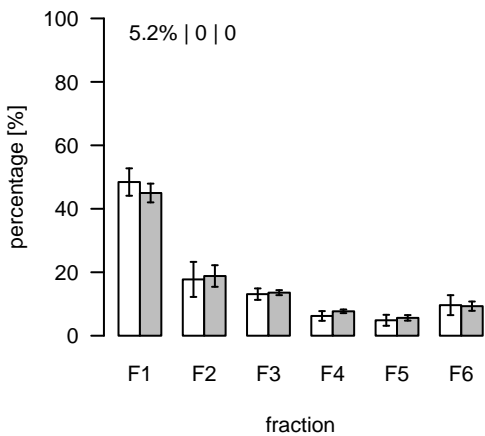

**S58 (m/z=513.140797; rt=4.64568)**  
T/S Cluster: S-4.6-1

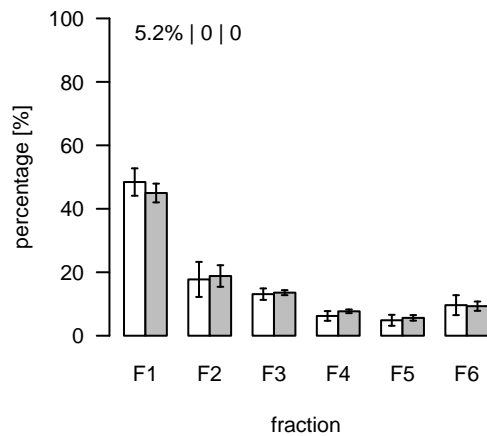

**S53 (m/z=414.151662; rt=4.64521)**  
T/S Cluster: S-4.6-1

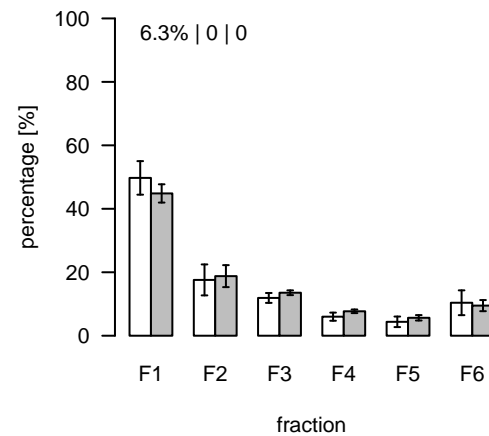

**S62 (m/z=494.119748; rt=4.64609)**  
T/S Cluster: S-4.6-1

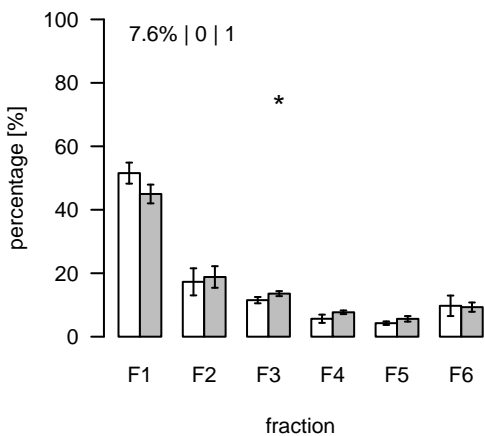

**S50 (m/z=252.104952; rt=4.64212)**  
T/S Cluster: S-4.6-1

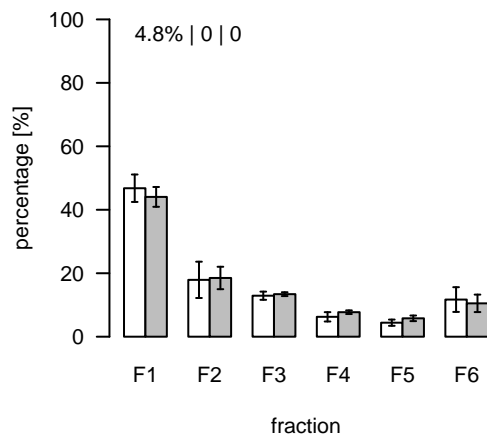

**S52 (m/z=512.130114; rt=4.64473)**  
T/S Cluster: S-4.6-1

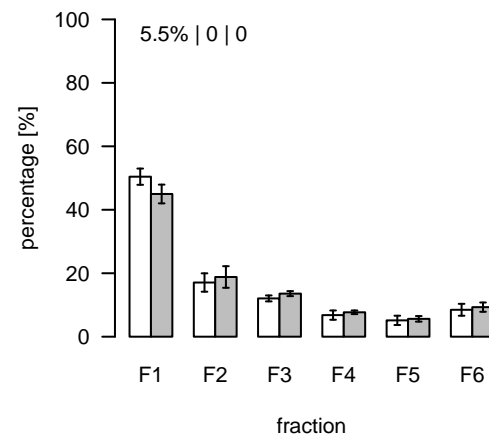

**S56 (m/z=513.123128; rt=4.64549)**  
T/S Cluster: S-4.6-1

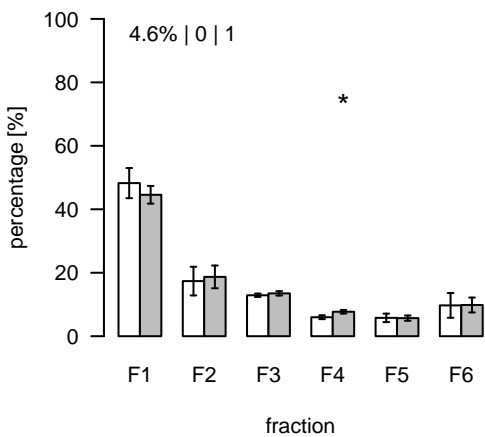

**S63 (m/z=415.166063; rt=4.6461)**  
T/S Cluster: S-4.6-1

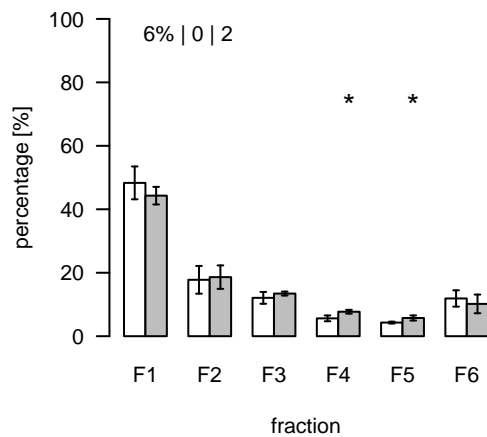

**S54 (m/z=494.100671; rt=4.6453)**  
T/S Cluster: S-4.6-1

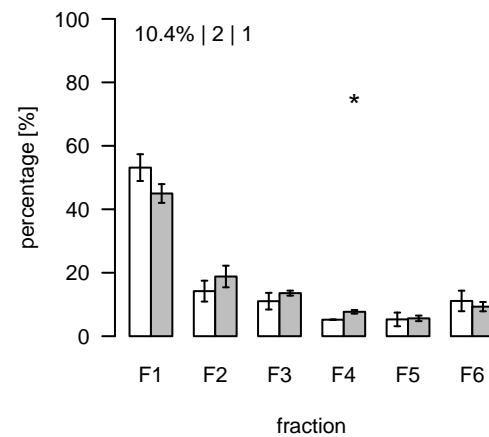

**S70 (m/z=358.113843; rt=4.70055)**  
T/S Cluster: S-4.7-1

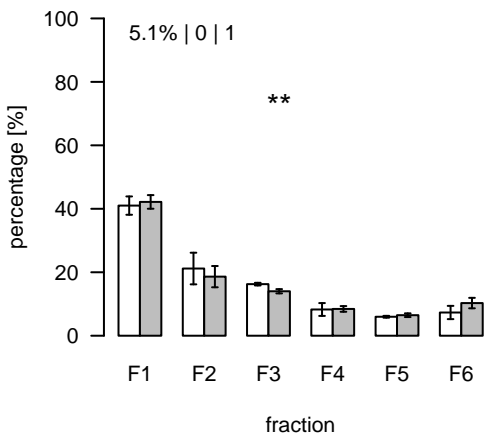

**S75 (m/z=207.065431; rt=4.70198)**  
T/S Cluster: S-4.7-1

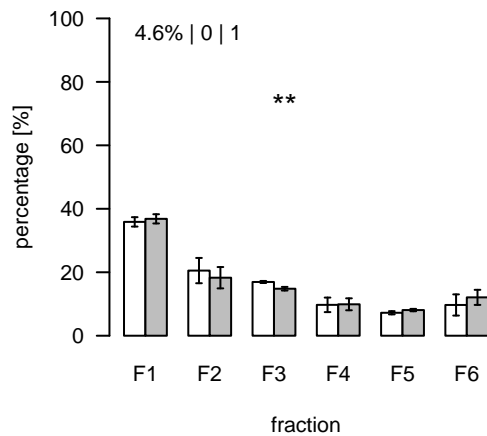

**S79 (m/z=698.194768; rt=4.70246)**  
T/S Cluster: S-4.7-1

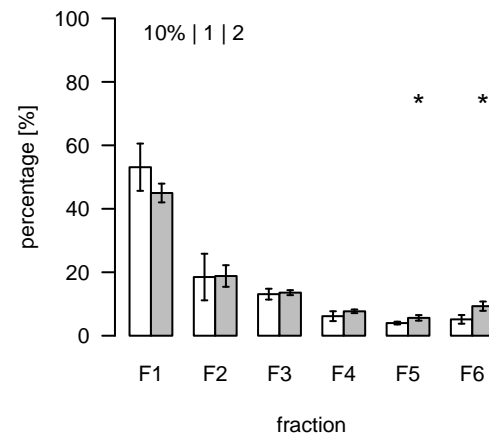

**S101** ( $m/z=341.087487$ ;  $rt=4.70723$ )  
T/S Cluster: S-4.7-1

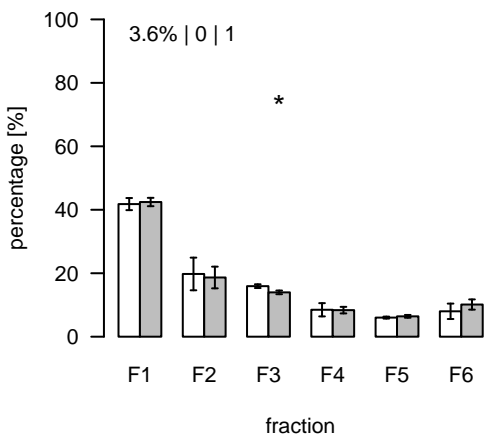

**S89** ( $m/z=1038.275955$ ;  $rt=4.70375$ )  
T/S Cluster: S-4.7-1

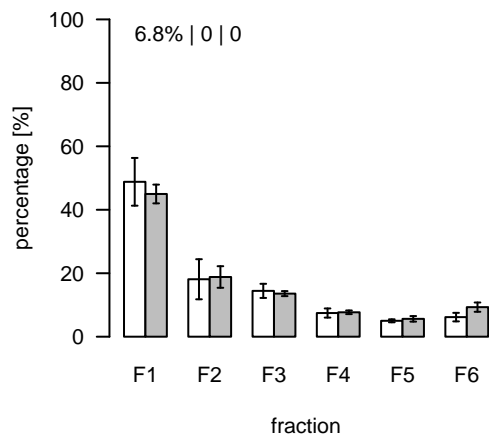

**S84** ( $m/z=699.198841$ ;  $rt=4.7027$ )  
T/S Cluster: S-4.7-1

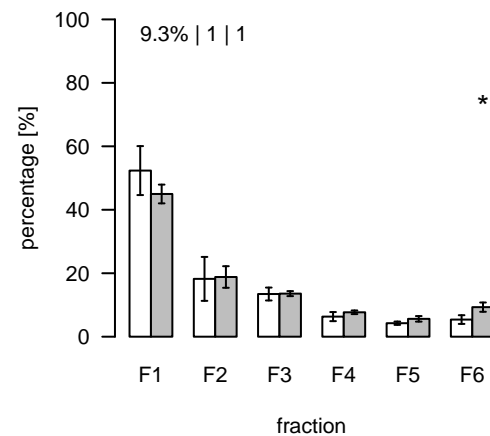

**S71** ( $m/z=179.057156$ ;  $rt=4.70058$ )  
T/S Cluster: S-4.7-1

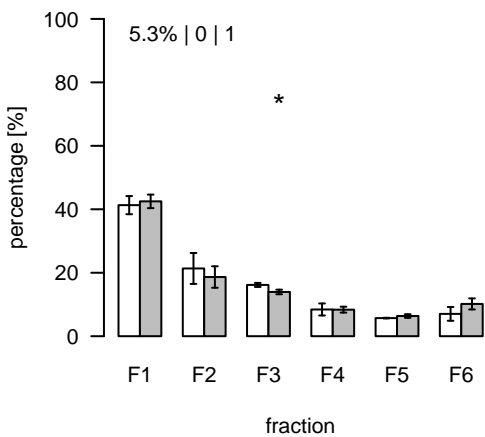

**S69** ( $m/z=359.117364$ ;  $rt=4.70044$ )  
T/S Cluster: S-4.7-1

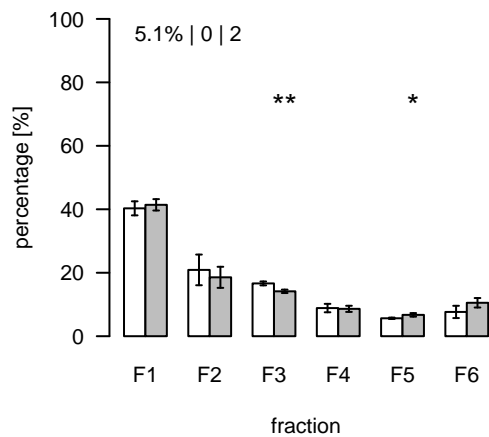

**S77** ( $m/z=207.062072$ ;  $rt=4.70206$ )  
T/S Cluster: S-4.7-1

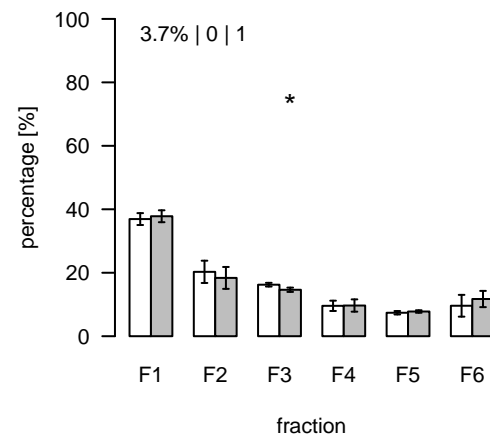

**S90** ( $m/z=1039.279838$ ;  $rt=4.70402$ )  
T/S Cluster: S-4.7-1

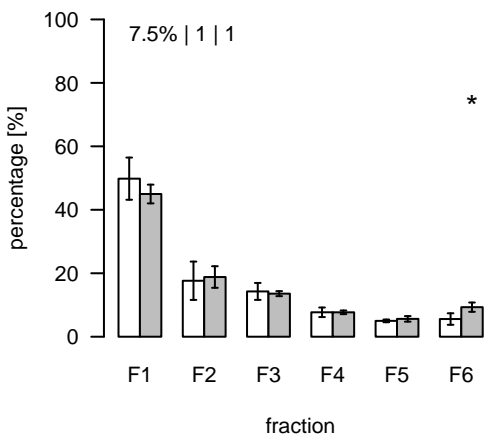

**S74** ( $m/z=103.532754$ ;  $rt=4.70197$ )  
T/S Cluster: S-4.7-1

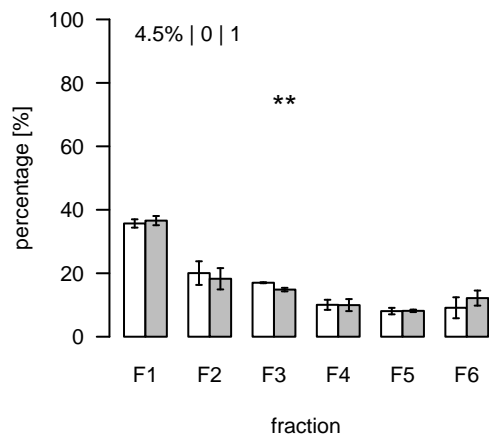

**S80** ( $m/z=349.098521$ ;  $rt=4.70259$ )  
T/S Cluster: S-4.7-1

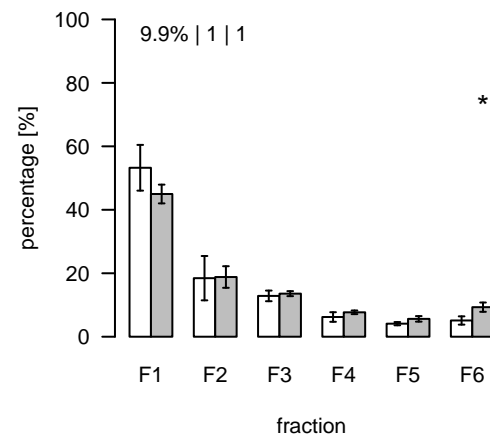

**S97 (m/z=342.090634; rt=4.70713)**  
T/S Cluster: S-4.7-1

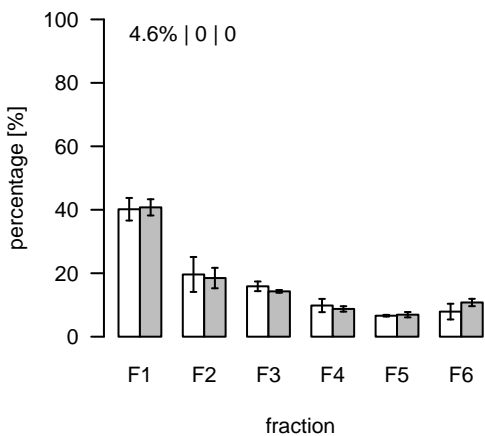

**S85 (m/z=700.201389; rt=4.70313)**  
T/S Cluster: S-4.7-1

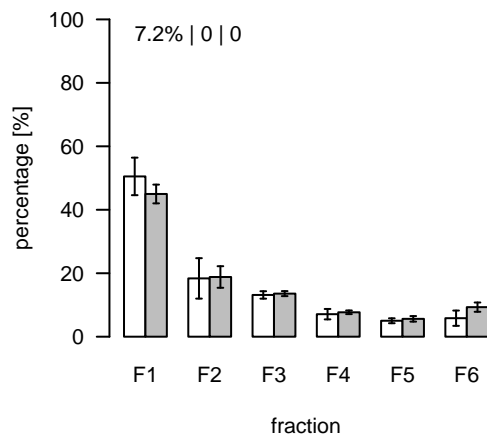

**S95 (m/z=341.077879; rt=4.70665)**  
T/S Cluster: S-4.7-1

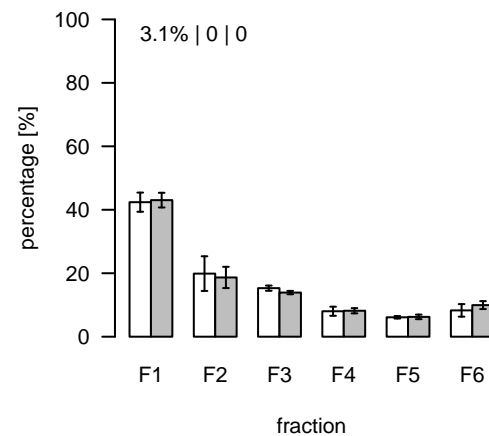

**S82 (m/z=208.068806; rt=4.70265)**  
T/S Cluster: S-4.7-1

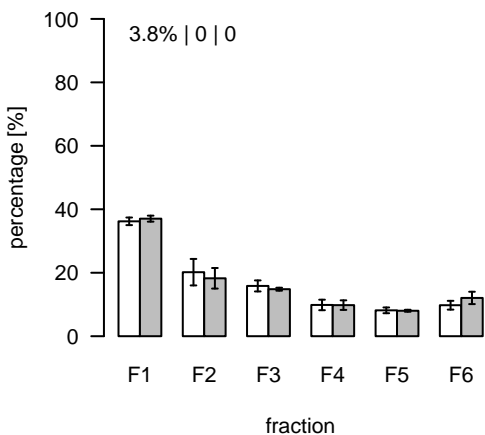

**S73 (m/z=119.372119; rt=4.7011)**  
T/S Cluster: S-4.7-1

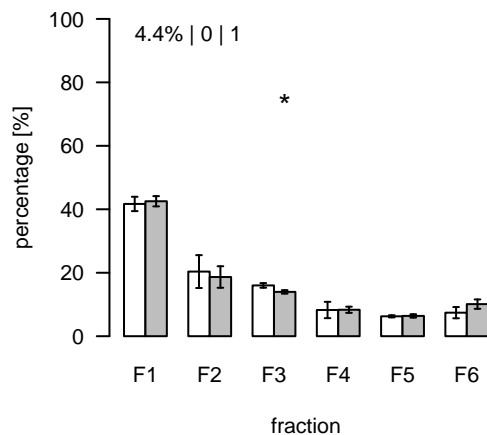

**S99 (m/z=170.544045; rt=4.70722)**  
T/S Cluster: S-4.7-1

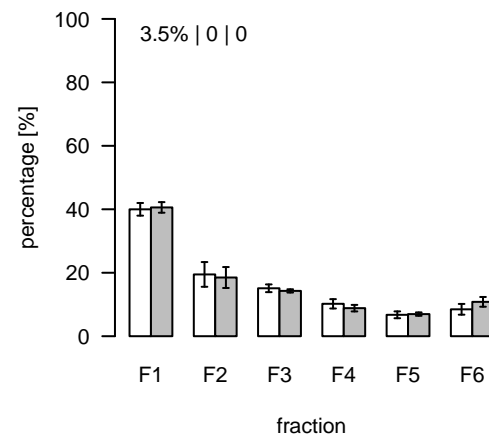

**S100 (m/z=1378.365763; rt=4.70723)**  
T/S Cluster: S-4.7-1

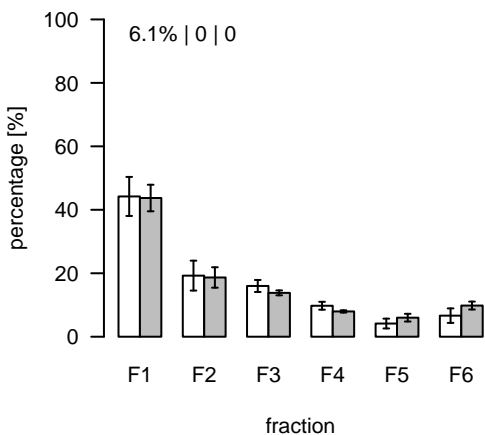

**S102 (m/z=571.197514; rt=4.70733)**  
T/S Cluster: S-4.7-1

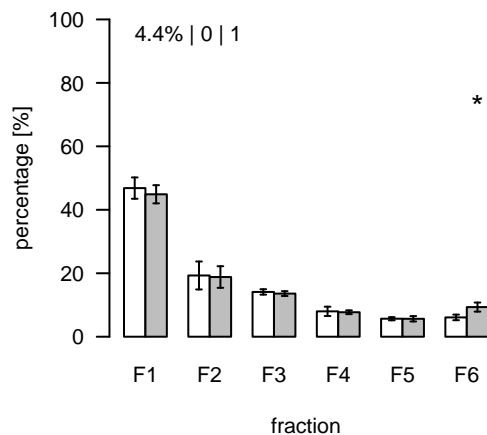

**S81 (m/z=208.066265; rt=4.7026)**  
T/S Cluster: S-4.7-1

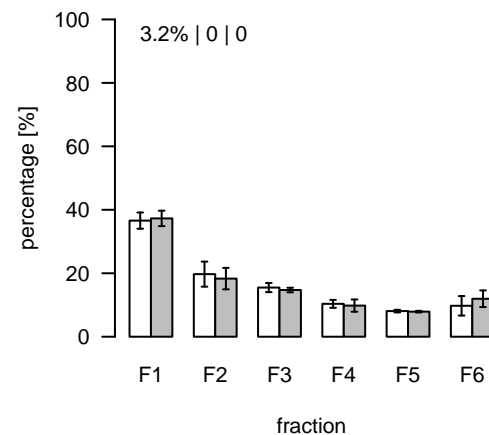



**S98 (m/z=571.175675; rt=4.70719)**  
T/S Cluster: S-4.7-1

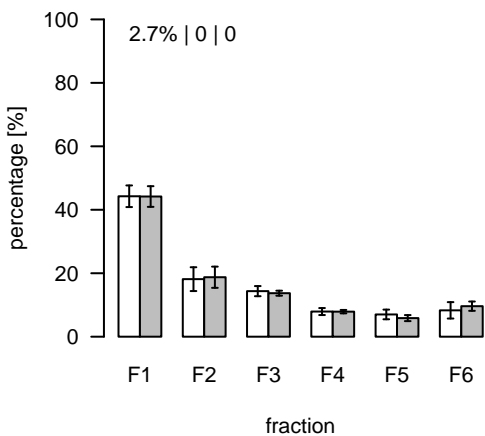

**S83 (m/z=119.370716; rt=4.70268)**  
T/S Cluster: S-4.7-1

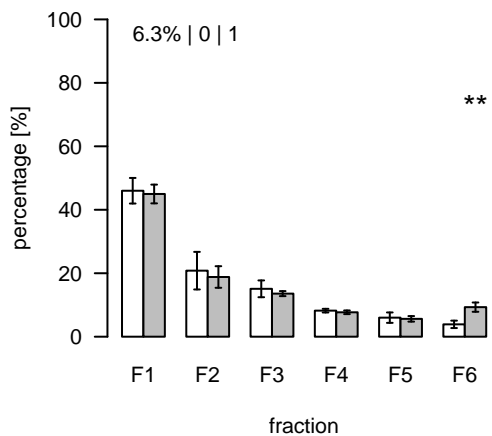

**S88 (m/z=700.153647; rt=4.70369)**  
T/S Cluster: S-4.7-1

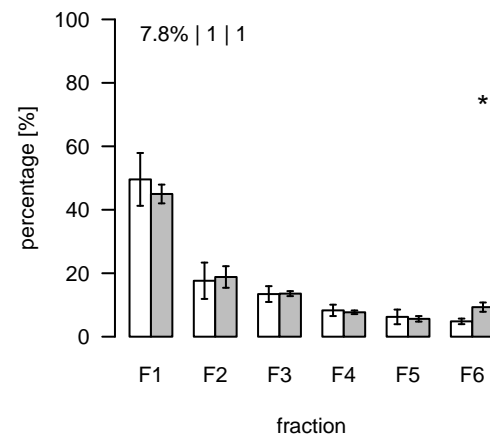

**S94 (m/z=1040.282221; rt=4.70495)**  
T/S Cluster: S-4.7-1

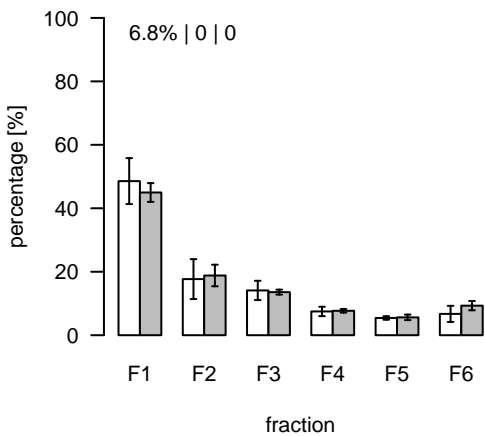

**S64 (m/z=851.226662; rt=4.67883)**  
T/S Cluster: S-4.7-1

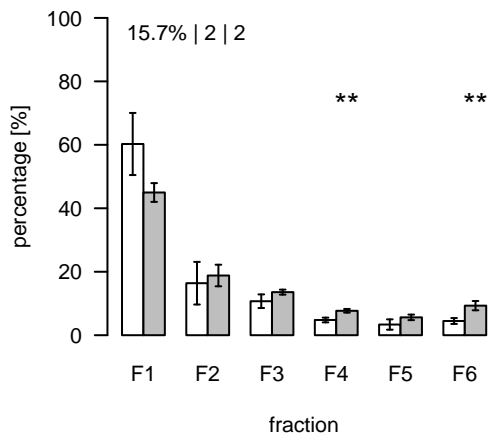

**S91 (m/z=349.60025; rt=4.7041)**  
T/S Cluster: S-4.7-1

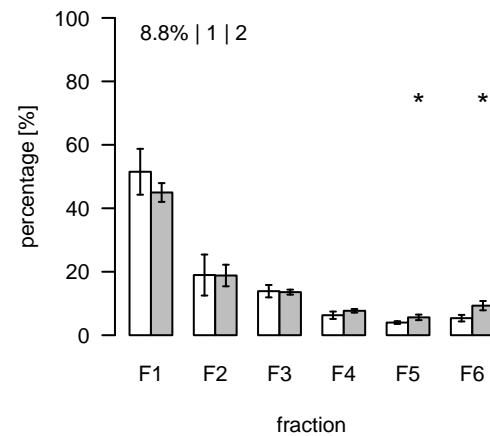

**S93 (m/z=519.14016; rt=4.70433)**  
T/S Cluster: S-4.7-1

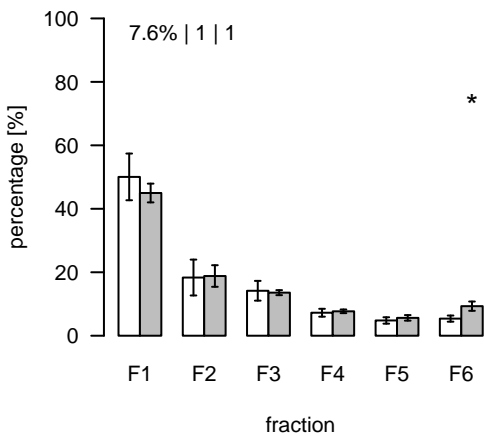

**S86 (m/z=232.734991; rt=4.70354)**  
T/S Cluster: S-4.7-1

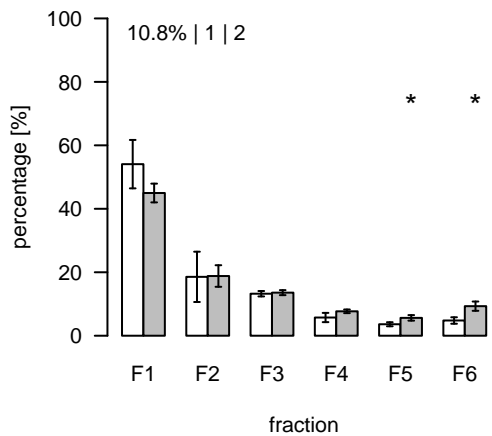

**S87 (m/z=360.11984; rt=4.70367)**  
T/S Cluster: S-4.7-1

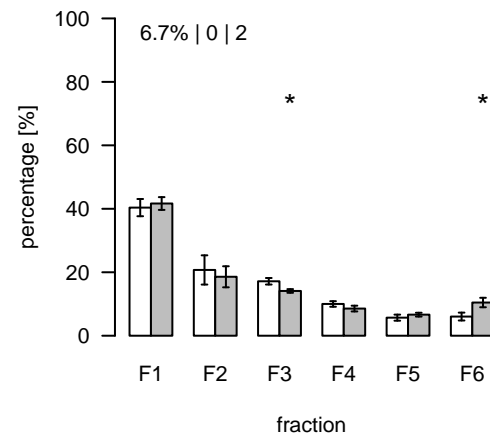

**S96 (m/z=1379.369431; rt=4.70709)**  
T/S Cluster: S-4.7-1

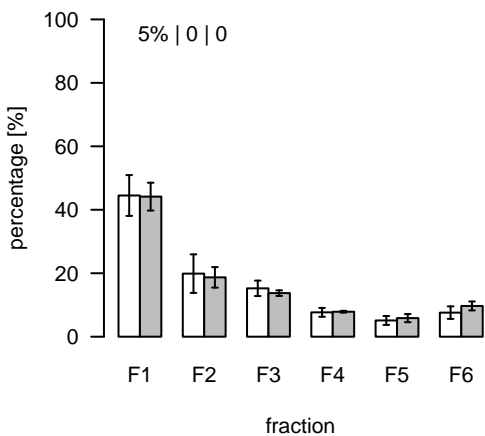

**S78 (m/z=179.558904; rt=4.70236)**  
T/S Cluster: S-4.7-1

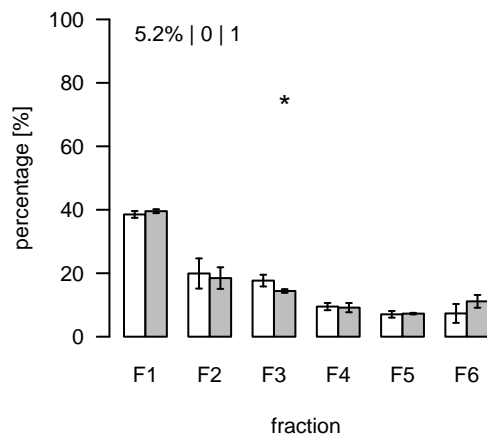

**S92 (m/z=360.113923; rt=4.70422)**  
T/S Cluster: S-4.7-1

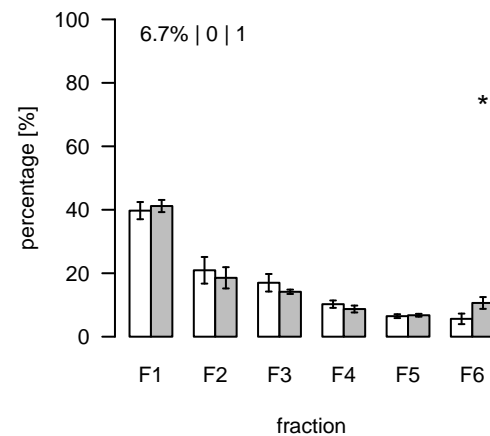

**S65 (m/z=1208.336651; rt=4.68743)**  
T/S Cluster: S-4.7-1

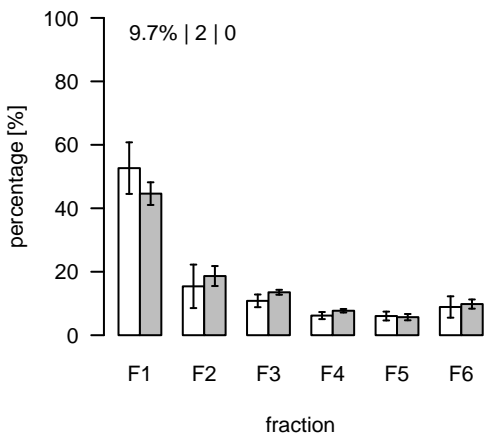

**S66 (m/z=214.089996; rt=4.69654)**  
T/S Cluster: S-4.7-2

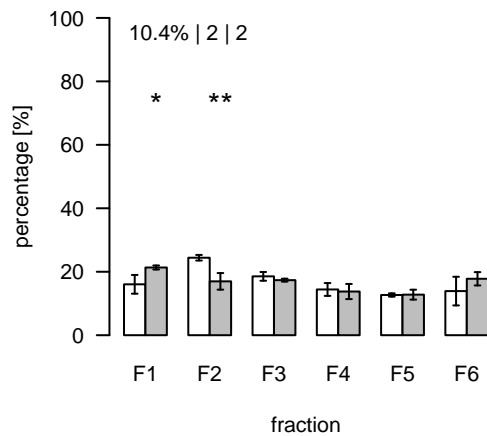

**S67 (m/z=363.069426; rt=4.69721)**  
T/S Cluster: S-4.7-3

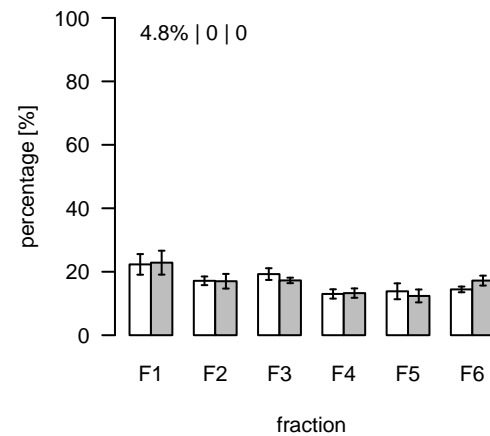

**S68 (m/z=703.15102; rt=4.70008)**  
T/S Cluster: S-4.7-4

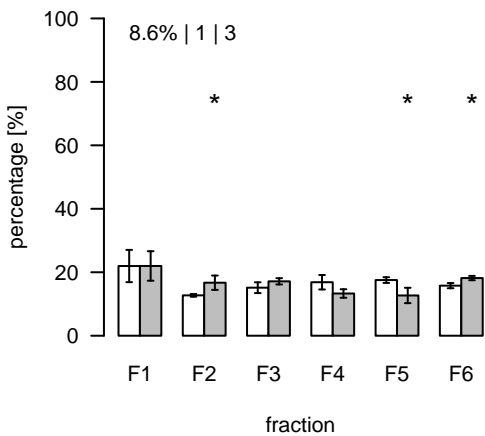

**S72 (m/z=704.154486; rt=4.7008)**  
T/S Cluster: S-4.7-5

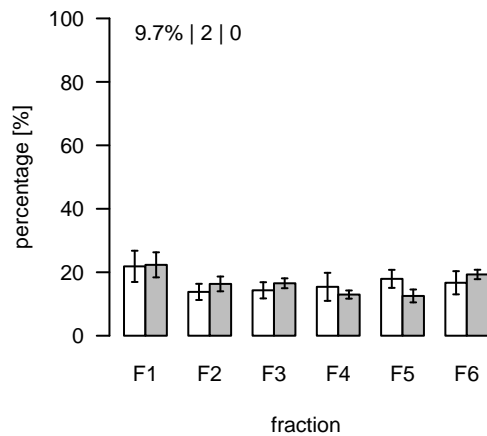

**S76 (m/z=1043.231277; rt=4.70204)**  
T/S Cluster: S-4.7-6

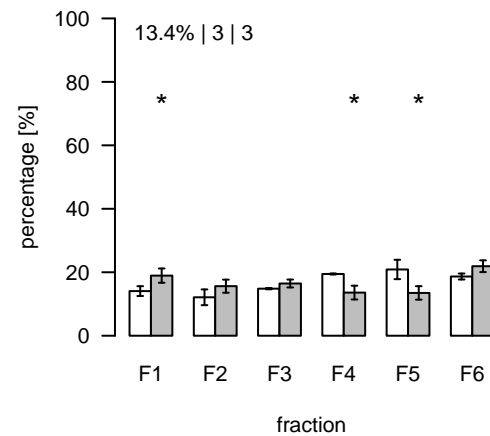

**S103 (m/z=437.749338; rt=4.70748)**  
T/S Cluster: S-4.7-7

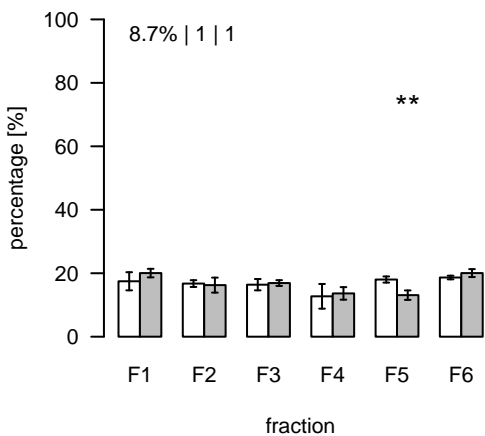

**S104 (m/z=277.166369; rt=4.75064)**  
T/S Cluster: S-4.8-1

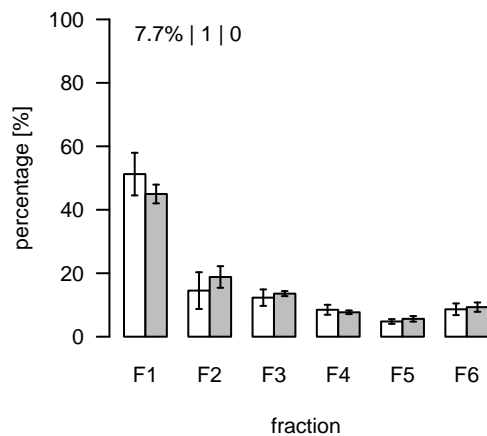

**S105 (m/z=277.161517; rt=4.75558)**  
T/S Cluster: S-4.8-1

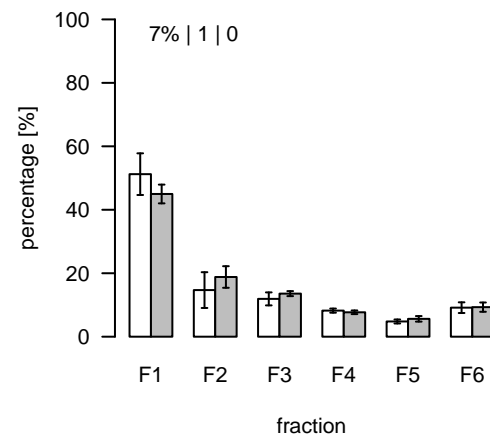

**S106 (m/z=823.790996; rt=4.77803)**  
T/S Cluster: S-4.8-2

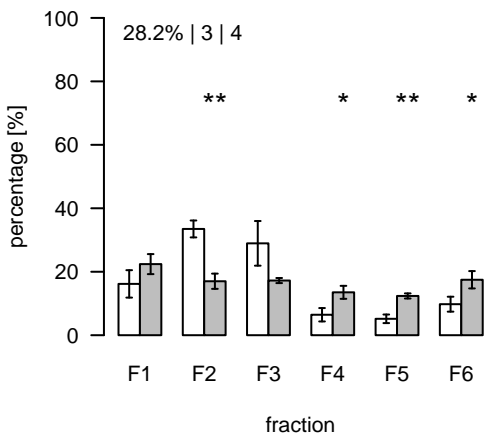

**S115 (m/z=358.1137; rt=4.91112)**  
T/S Cluster: S-4.9-1

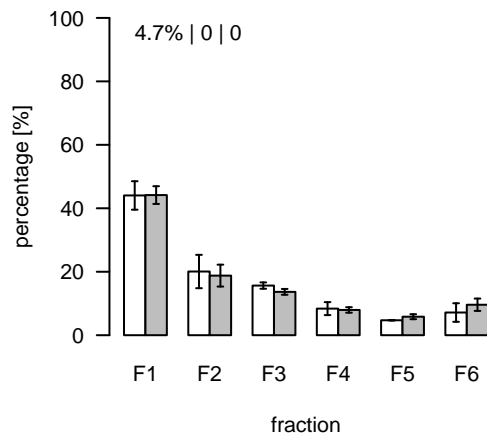

**S112 (m/z=207.065409; rt=4.91067)**  
T/S Cluster: S-4.9-1

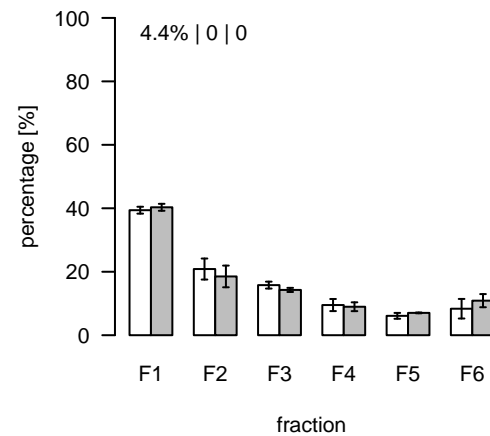

**S113 (m/z=207.065442; rt=4.91092)**  
T/S Cluster: S-4.9-1

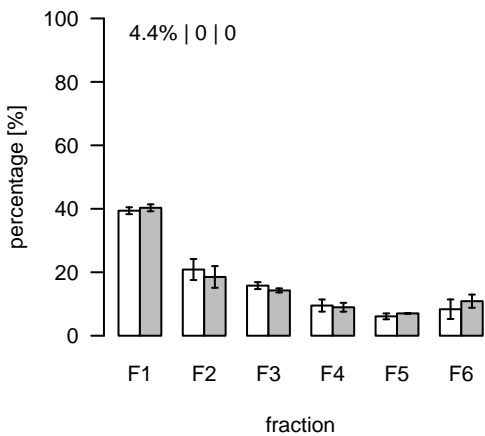

**S118 (m/z=703.151218; rt=4.91119)**  
T/S Cluster: S-4.9-1

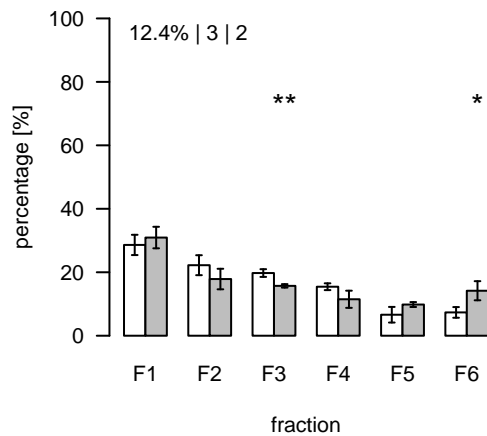

**S108 (m/z=698.195742; rt=4.90929)**  
T/S Cluster: S-4.9-1

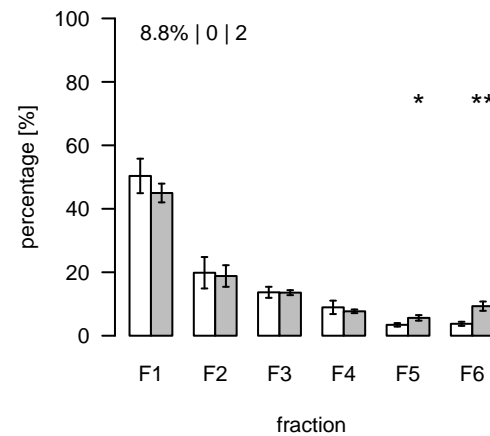

**S121 (m/z=363.069451; rt=4.91298)**  
T/S Cluster: S-4.9-1

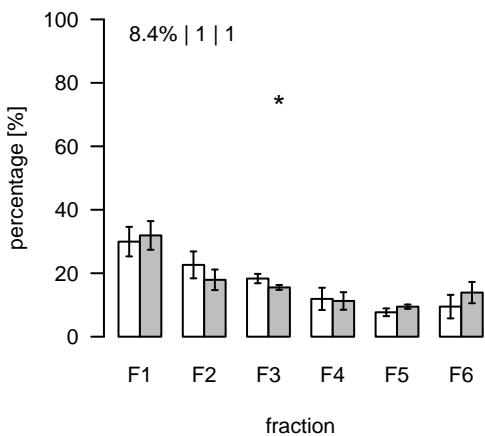

**S119 (m/z=704.154682; rt=4.91146)**  
T/S Cluster: S-4.9-1

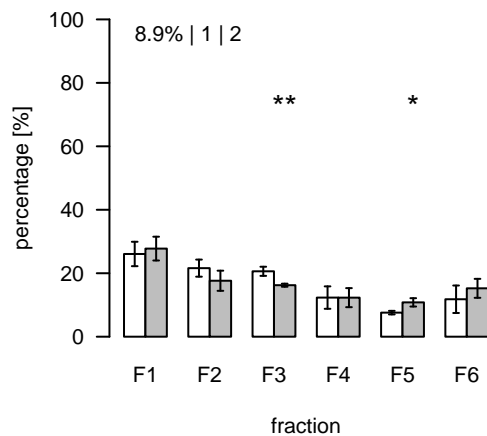

**S117 (m/z=359.117609; rt=4.91115)**  
T/S Cluster: S-4.9-1

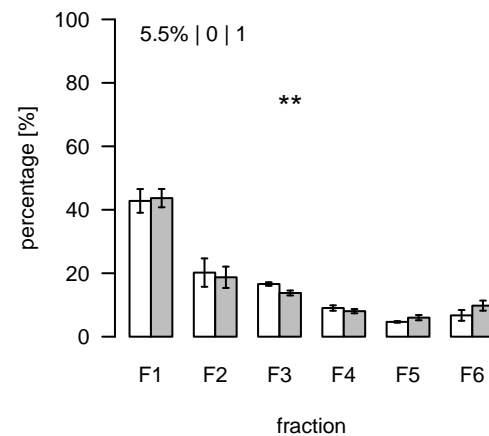

**S122 (m/z=363.062553; rt=4.91356)**  
T/S Cluster: S-4.9-1

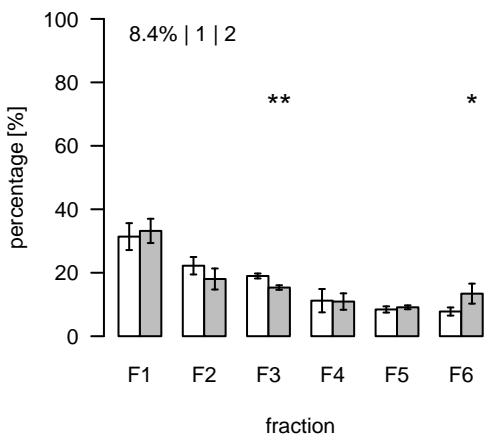

**S114 (m/z=179.057143; rt=4.91102)**  
T/S Cluster: S-4.9-1

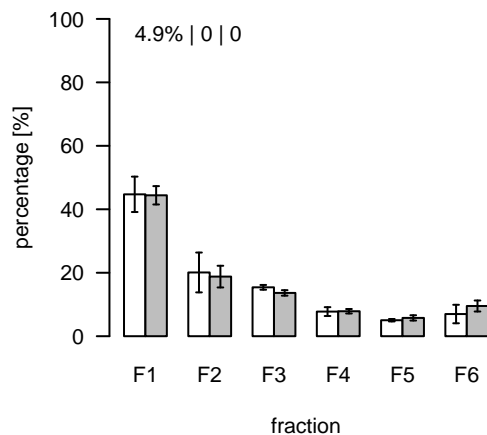

**S116 (m/z=359.110969; rt=4.91112)**  
T/S Cluster: S-4.9-1

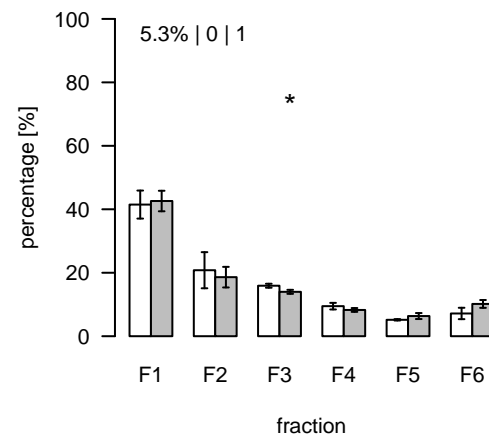

**S111 (m/z=207.062025; rt=4.91061)**  
T/S Cluster: S-4.9-1

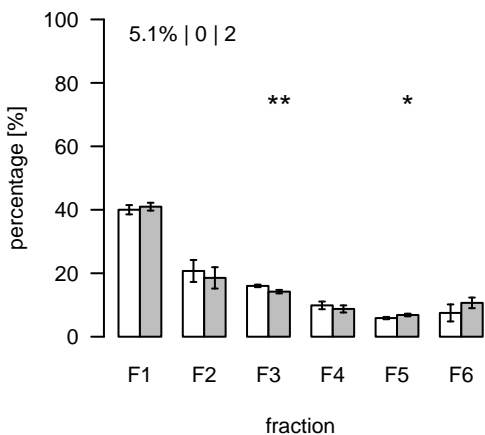

**S120 (m/z=703.112616; rt=4.91243)**  
T/S Cluster: S-4.9-1

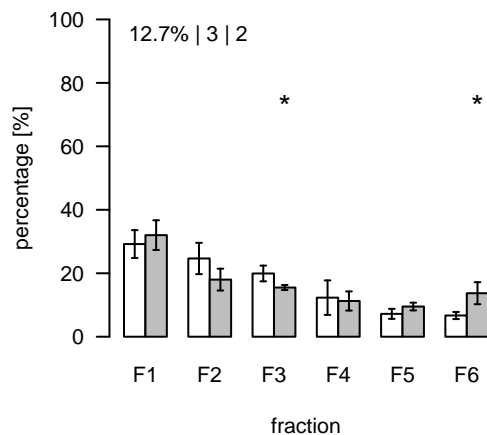

**S107 (m/z=699.199053; rt=4.90916)**  
T/S Cluster: S-4.9-1

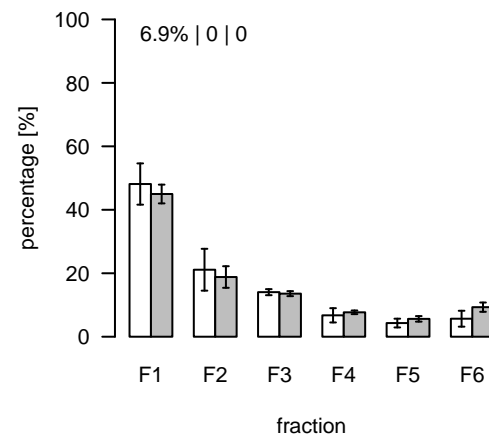

**S110 (m/z=103.532803; rt=4.91058)**  
T/S Cluster: S-4.9-1

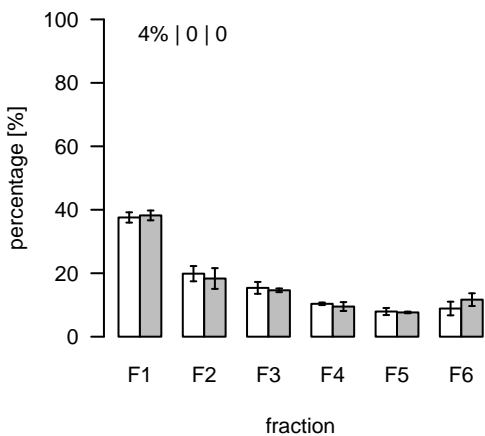

**S109 (m/z=208.068705; rt=4.91007)**  
T/S Cluster: S-4.9-1

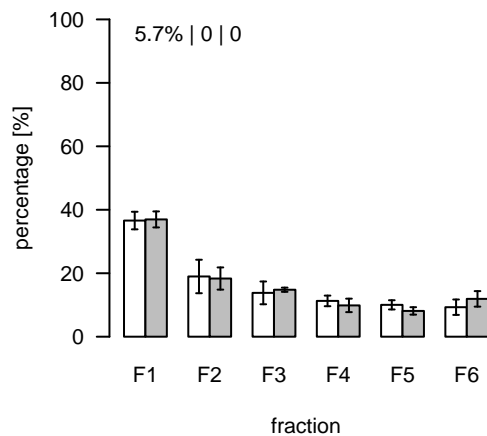

**S125 (m/z=513.133605; rt=5.18044)**  
T/S Cluster: S-5.2-1

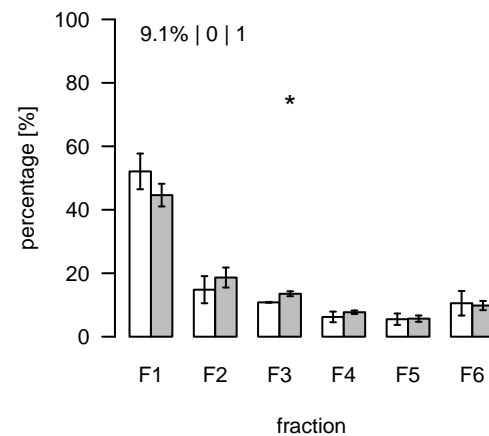

**S124 (m/z=513.133314; rt=5.17272)**  
T/S Cluster: S-5.2-1

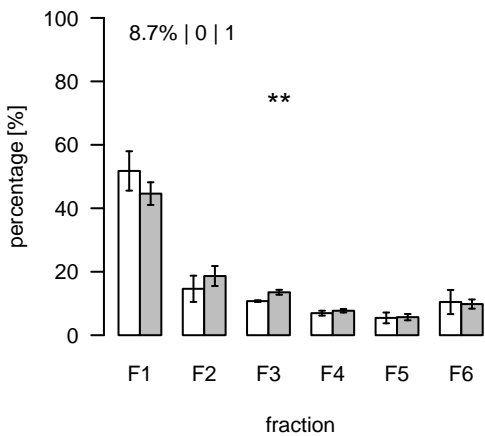

**S123 (m/z=496.106796; rt=5.17269)**  
T/S Cluster: S-5.2-1

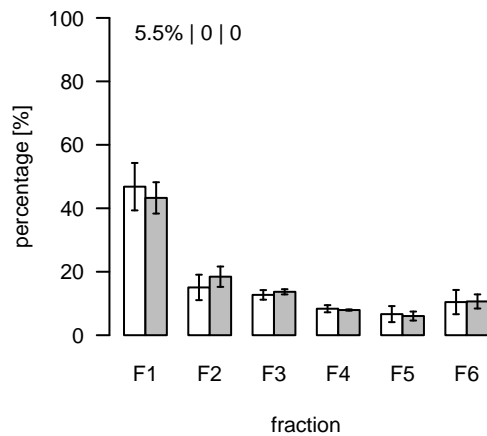

**S126 (m/z=496.107072; rt=5.18076)**  
T/S Cluster: S-5.2-1

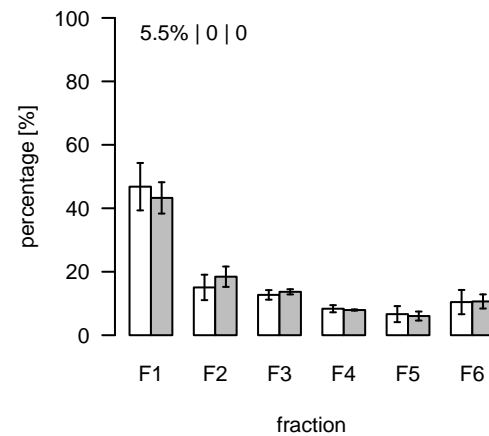

**S127 (m/z=222.290454; rt=5.18978)**  
T/S Cluster: S-5.2-2

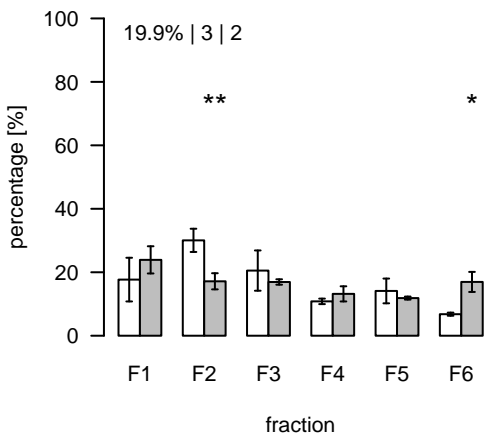

**S128 (m/z=437.771465; rt=5.3738)**  
T/S Cluster: S-5.4-1

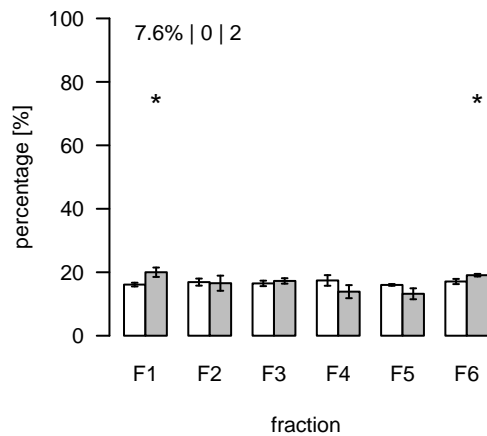

**S129 (m/z=757.221309; rt=5.39389)**  
T/S Cluster: S-5.4-2

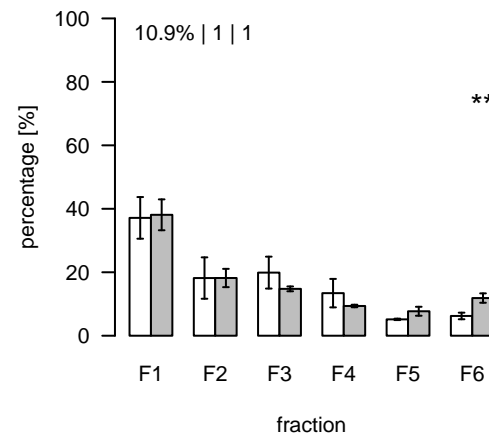

**S131 (m/z=404.155952; rt=5.47364)**  
T/S Cluster: S-5.5-1

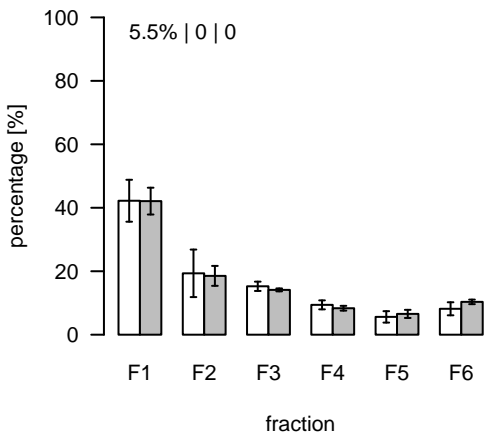

**S130 (m/z=404.14443; rt=5.47232)**  
T/S Cluster: S-5.5-1

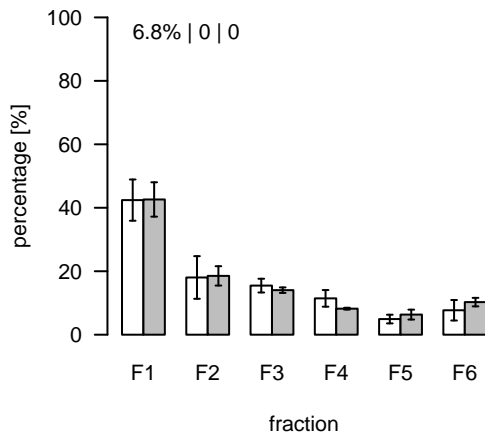

**S132 (m/z=437.744268; rt=5.61356)**  
T/S Cluster: S-5.6-1

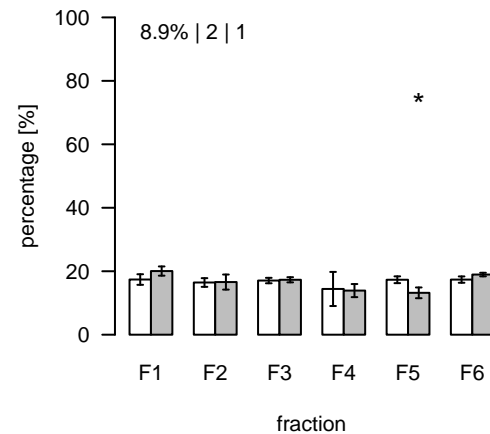

**S146 (m/z=741.22555; rt=5.70338)**  
T/S Cluster: S-5.7-1

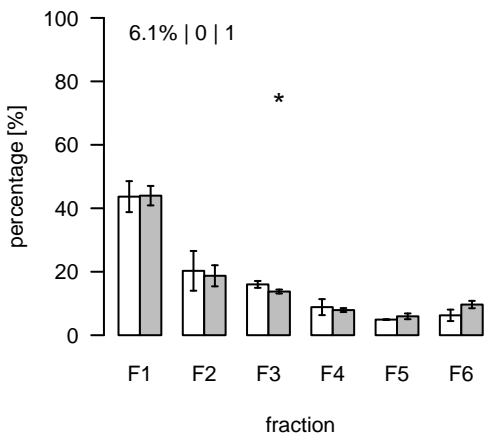

**S145 (m/z=742.229747; rt=5.70334)**  
T/S Cluster: S-5.7-1

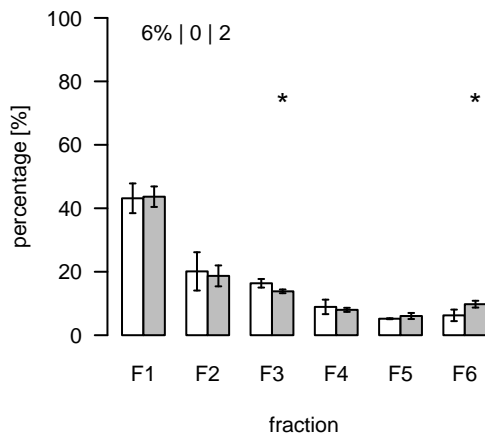

**S144 (m/z=370.613999; rt=5.70321)**  
T/S Cluster: S-5.7-1

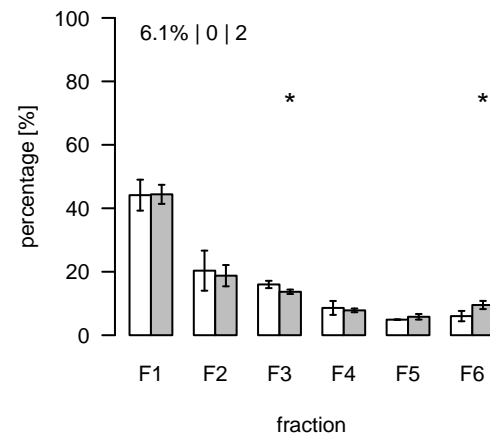

**S143 (m/z=743.232701; rt=5.7031)**  
T/S Cluster: S-5.7-1

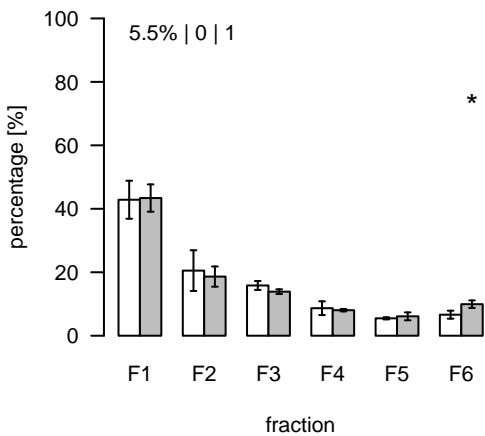

**S142 (m/z=371.115957; rt=5.70307)**  
T/S Cluster: S-5.7-1

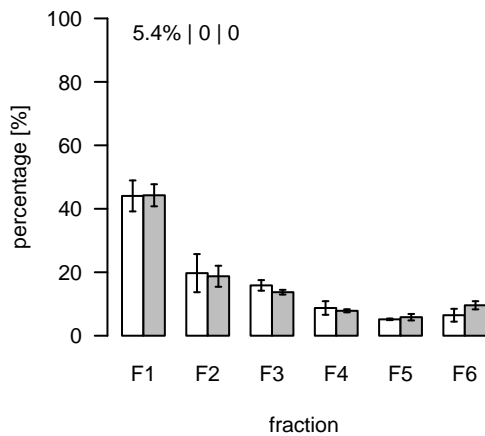

**S135 (m/z=595.168375; rt=5.70155)**  
T/S Cluster: S-5.7-1

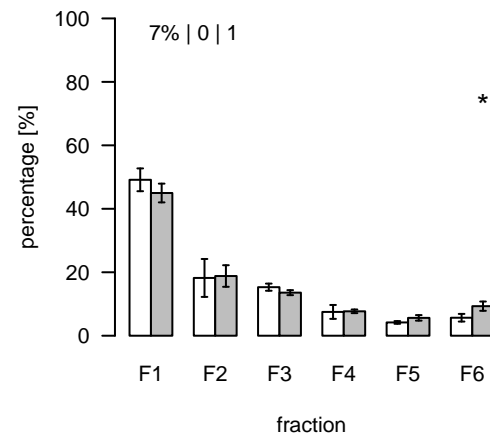

**S139 (m/z=247.078808; rt=5.70291)**  
T/S Cluster: S-5.7-1

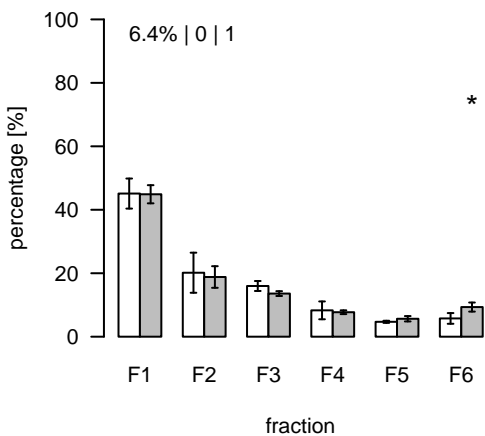

**S140 (m/z=433.11397; rt=5.70294)**  
T/S Cluster: S-5.7-1

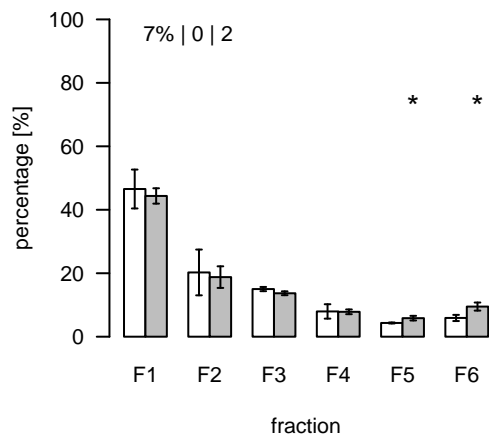

**S138 (m/z=744.235291; rt=5.70272)**  
T/S Cluster: S-5.7-1

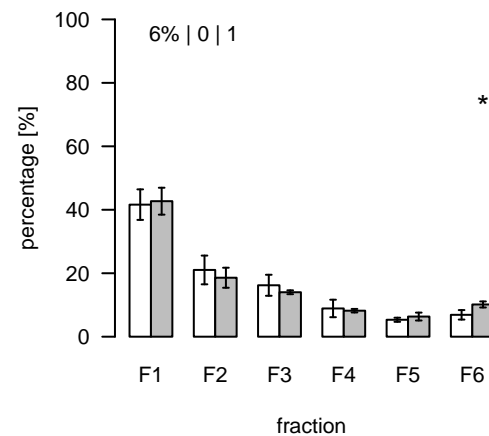

**S133 (m/z=214.089921; rt=5.70086)**  
T/S Cluster: S-5.7-1

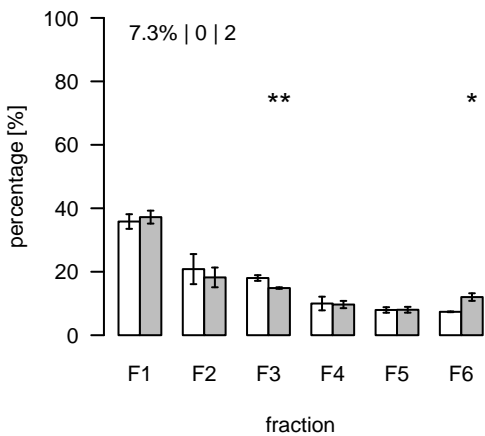

**S134 (m/z=595.148284; rt=5.7015)**  
T/S Cluster: S-5.7-1

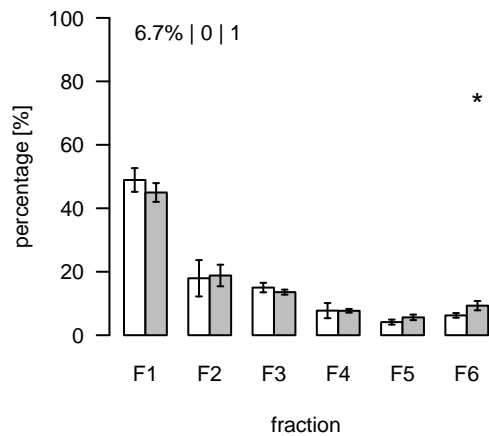

**S137 (m/z=433.10254; rt=5.70226)**  
T/S Cluster: S-5.7-1

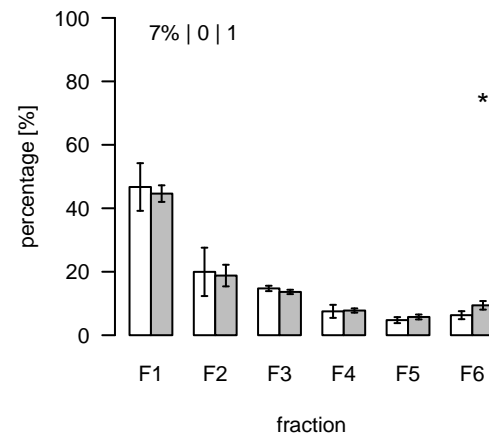

**S141 (m/z=247.413311; rt=5.70306)**  
T/S Cluster: S-5.7-1

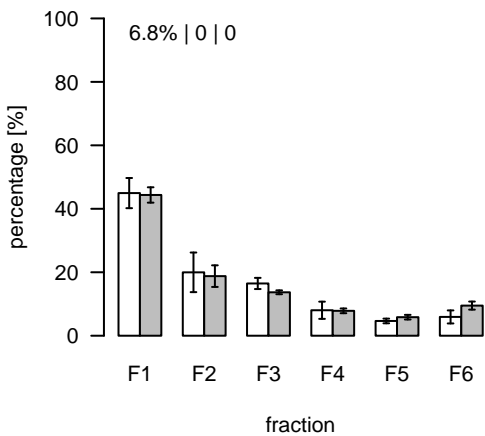

**S136 (m/z=247.071511; rt=5.70156)**  
T/S Cluster: S-5.7-1

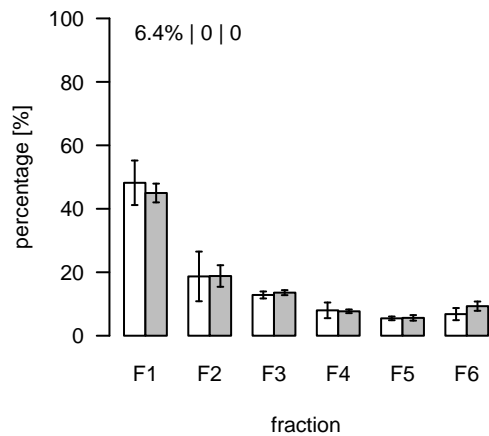

**S147 (m/z=763.208234; rt=5.71125)**  
T/S Cluster: S-5.7-2

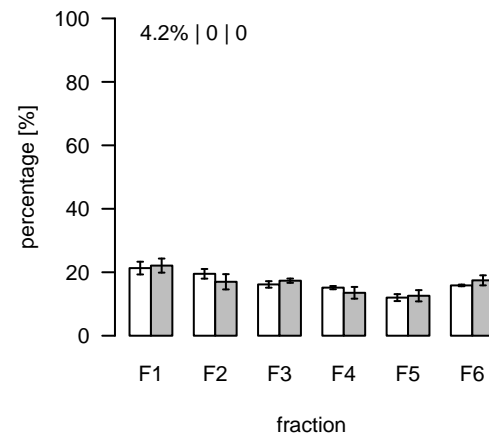

**S148 (m/z=382.144032; rt=5.79654)**  
T/S Cluster: S-5.8-1

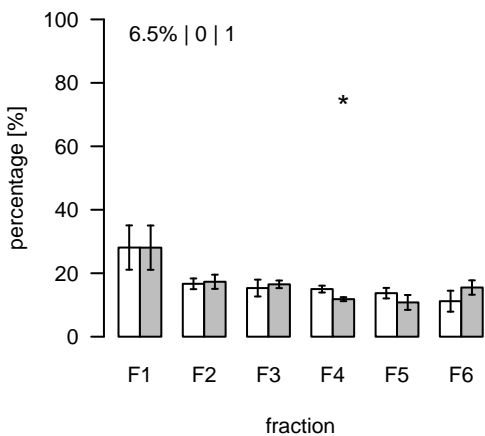

**S150 (m/z=404.228791; rt=5.84667)**  
T/S Cluster: S-5.8-2

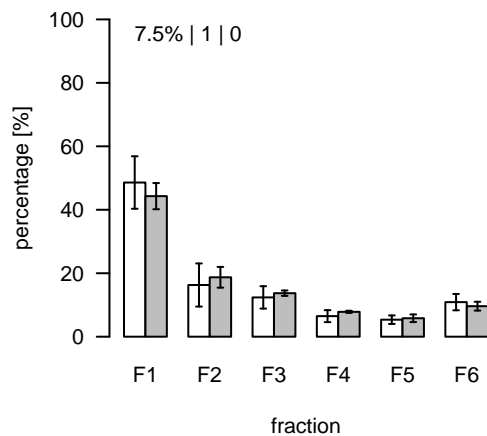

**S149 (m/z=404.21975; rt=5.84657)**  
T/S Cluster: S-5.8-2

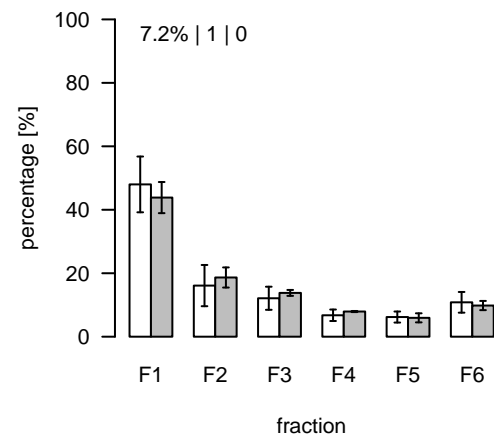

**S151 (m/z=428.205446; rt=5.84812)**  
T/S Cluster: S-5.8-2

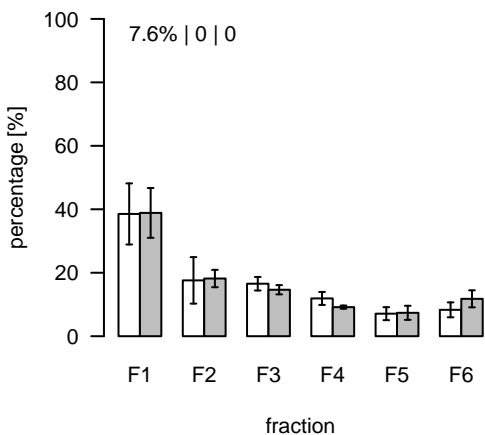

**S153 (m/z=741.227596; rt=5.96887)**  
T/S Cluster: S-6-1

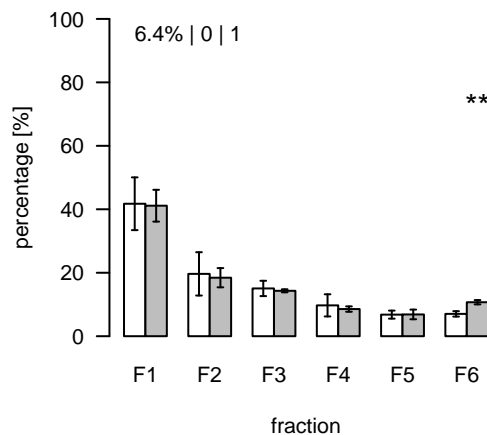

**S152 (m/z=741.227083; rt=5.96878)**  
T/S Cluster: S-6-1

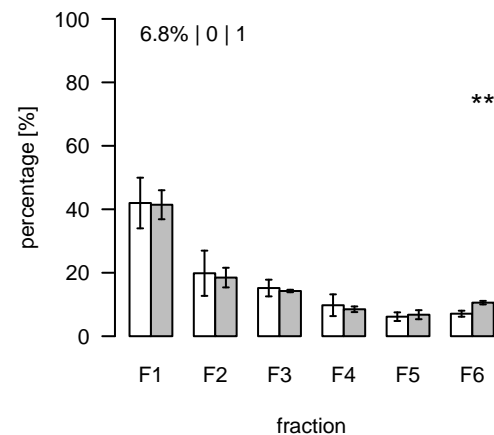

**S154 (m/z=742.230501; rt=5.97411)**  
T/S Cluster: S-6-2

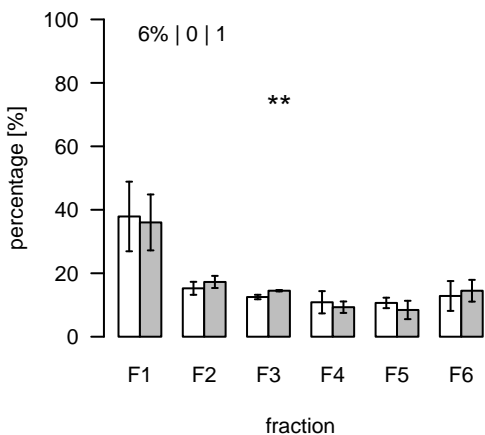

**S155 (m/z=742.230508; rt=5.97415)**  
T/S Cluster: S-6-2

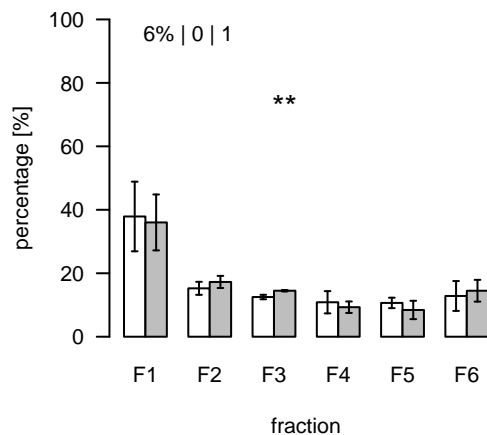

**S156 (m/z=823.747567; rt=6.01115)**  
T/S Cluster: S-6-3

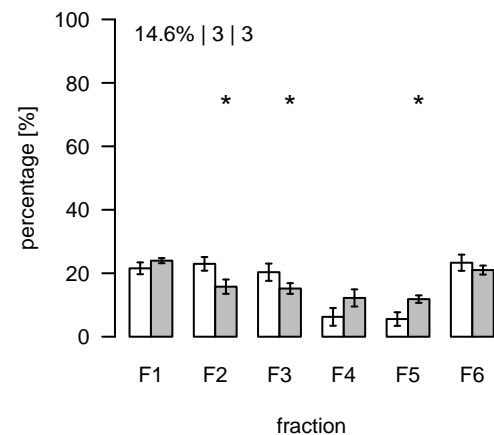



**S157 (m/z=437.768085; rt=6.01426)**  
T/S Cluster: S-6-4

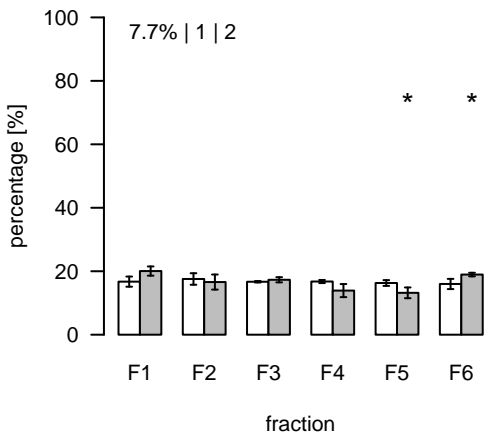

**S158 (m/z=700.284163; rt=6.07869)**  
T/S Cluster: S-6.1-1

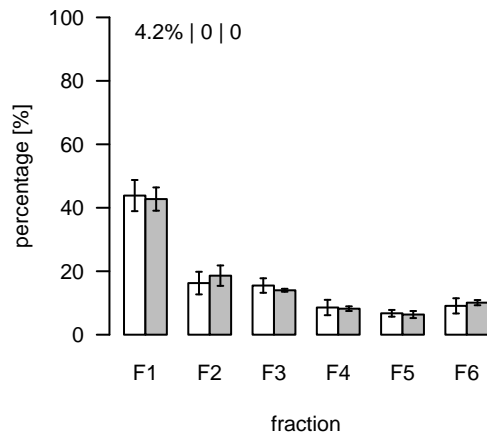

**S160 (m/z=700.284511; rt=6.07918)**  
T/S Cluster: S-6.1-1

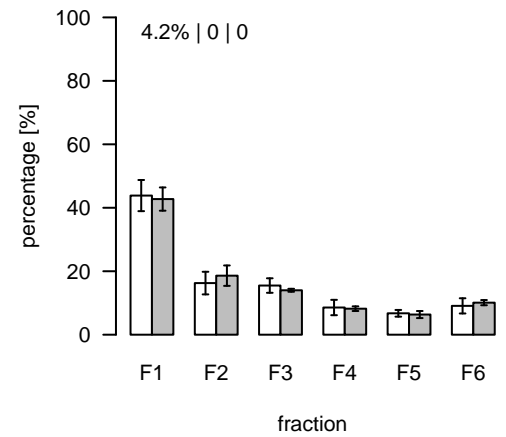

**S159 (m/z=611.163314; rt=6.07917)**  
T/S Cluster: S-6.1-1

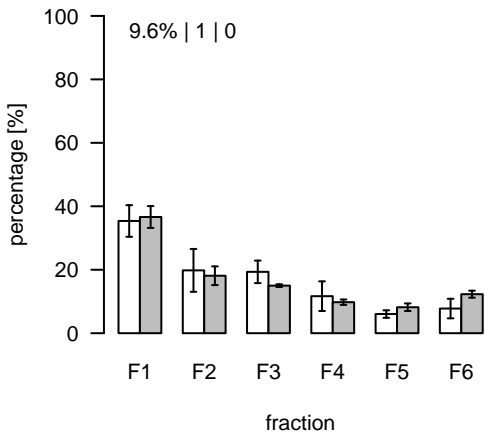

**S161 (m/z=428.20523; rt=6.18741)**  
T/S Cluster: S-6.2-1

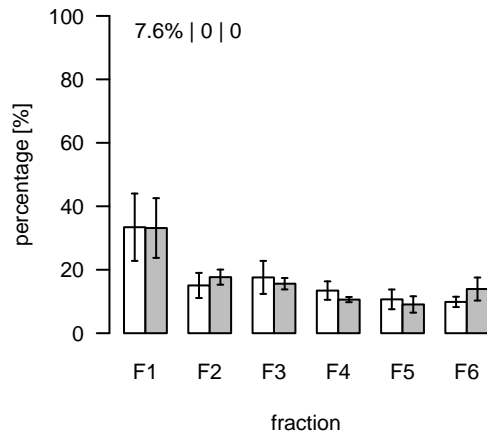

**S163 (m/z=698.195425; rt=6.24069)**  
T/S Cluster: S-6.2-2

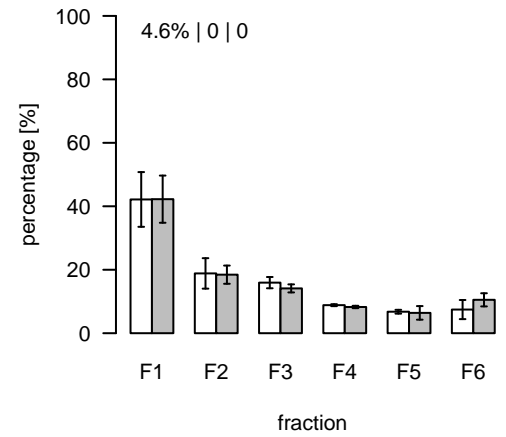

**S162 (m/z=513.133925; rt=6.20881)**  
T/S Cluster: S-6.2-2

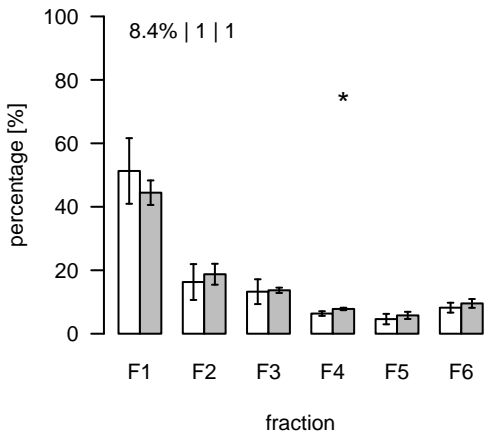

**S164 (m/z=898.373835; rt=6.25306)**  
T/S Cluster: S-6.3-1

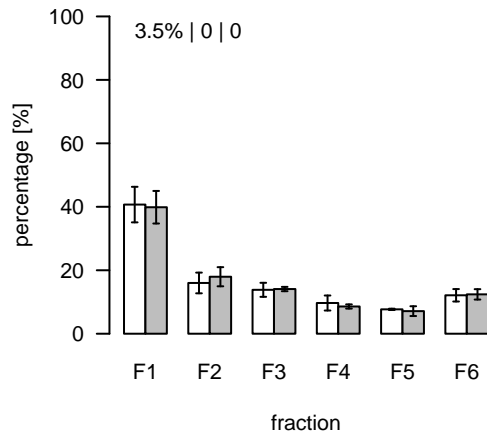

**S165 (m/z=823.334863; rt=6.2768)**  
T/S Cluster: S-6.3-2

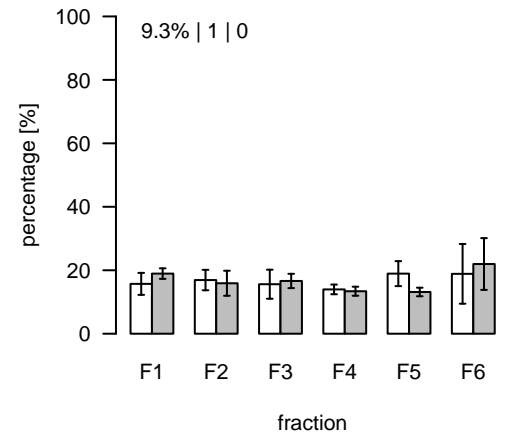

**S167 (m/z=757.222606; rt=6.36855)**  
T/S Cluster: S-6.4-1

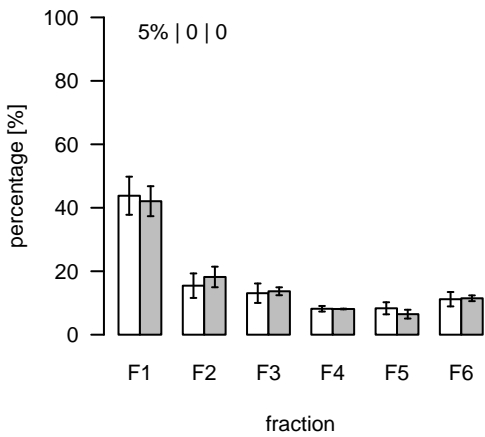

**S166 (m/z=757.195874; rt=6.3684)**  
T/S Cluster: S-6.4-1

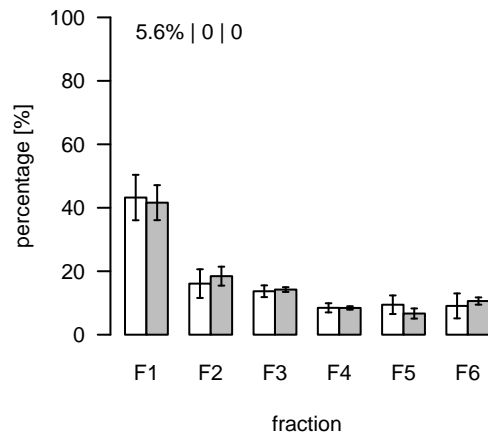

**S168 (m/z=437.724734; rt=6.46924)**  
T/S Cluster: S-6.5-1

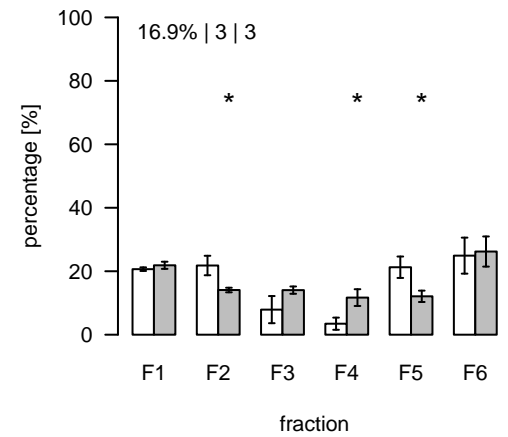

**S169 (m/z=214.089913; rt=6.56579)**  
T/S Cluster: S-6.6-1

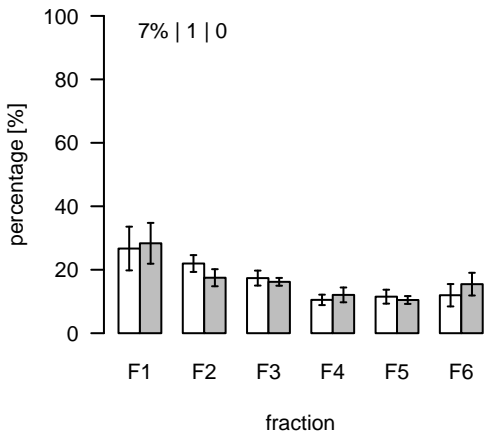

**S186 (m/z=595.167775; rt=6.58057)**  
T/S Cluster: S-6.6-2

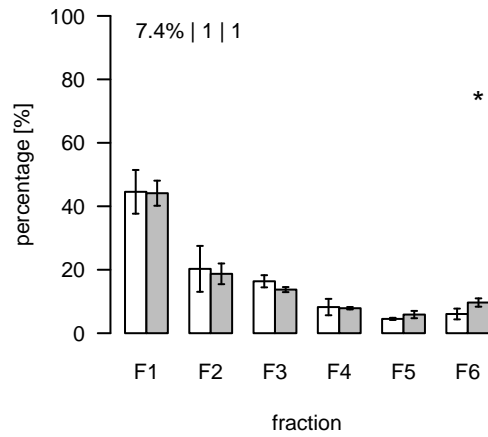

**S185 (m/z=596.171251; rt=6.58047)**  
T/S Cluster: S-6.6-2

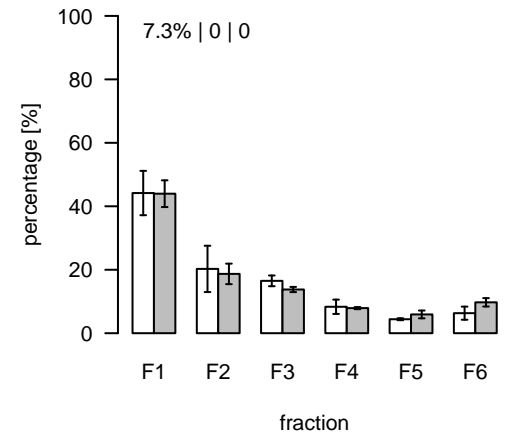

**S183 (m/z=297.584273; rt=6.58032)**  
T/S Cluster: S-6.6-2

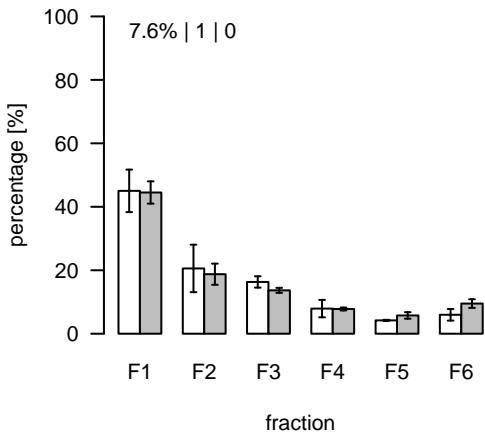

**S173 (m/z=1206.360419; rt=6.57793)**  
T/S Cluster: S-6.6-2

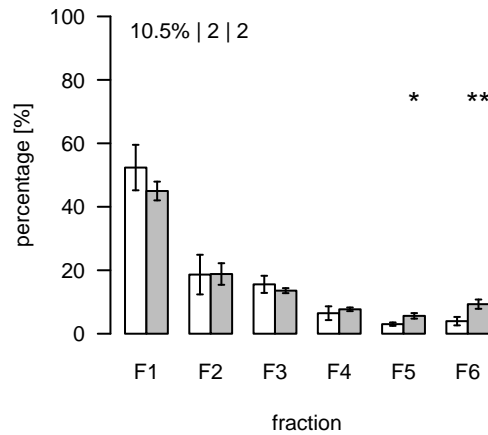

**S182 (m/z=597.174255; rt=6.58026)**  
T/S Cluster: S-6.6-2

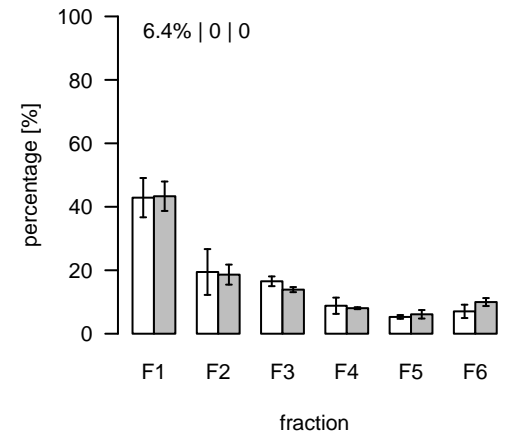

**S171 (m/z=1207.36308; rt=6.57759)**  
T/S Cluster: S-6.6-2

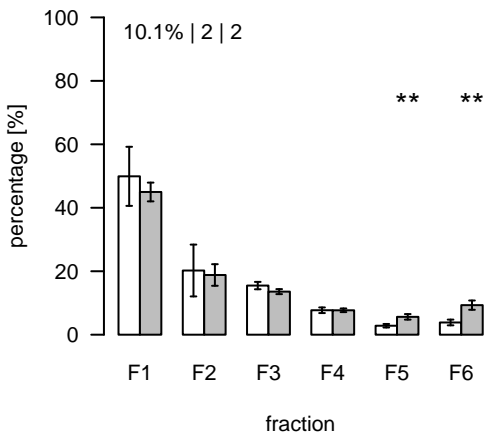

**S179 (m/z=433.114058; rt=6.57964)**  
T/S Cluster: S-6.6-2

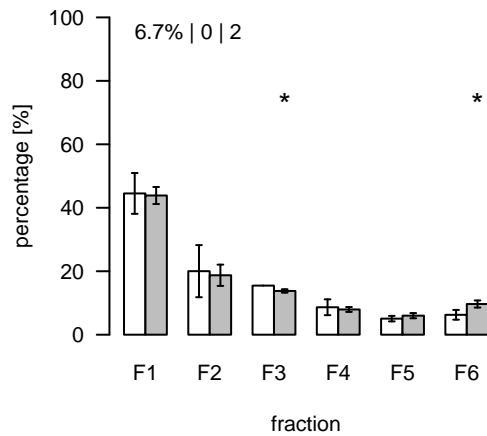

**S184 (m/z=596.143595; rt=6.58035)**  
T/S Cluster: S-6.6-2

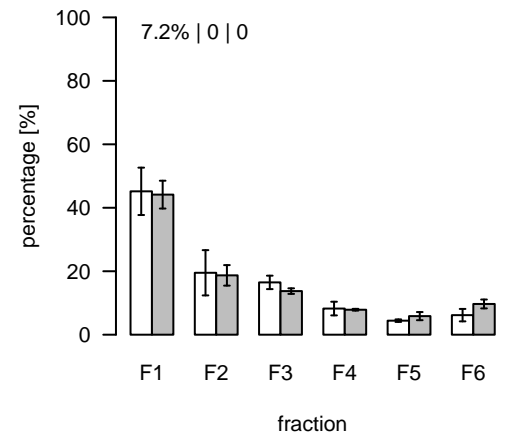

**S181 (m/z=287.055363; rt=6.58022)**  
T/S Cluster: S-6.6-2

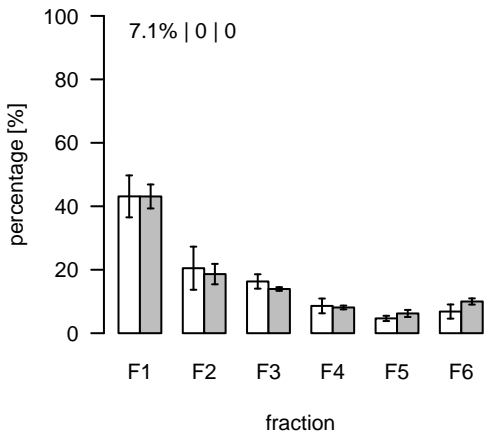

**S180 (m/z=198.391463; rt=6.5799)**  
T/S Cluster: S-6.6-2

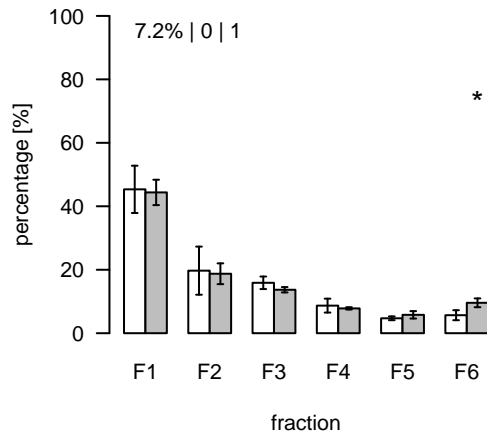

**S187 (m/z=298.086223; rt=6.58058)**  
T/S Cluster: S-6.6-2

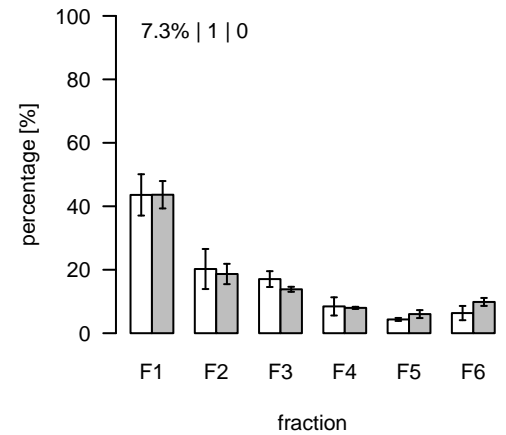

**S178 (m/z=597.154557; rt=6.57952)**  
T/S Cluster: S-6.6-2

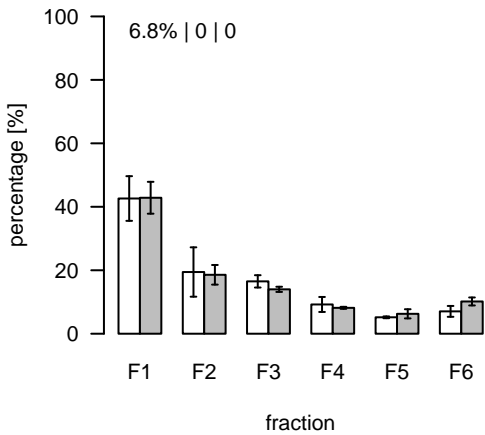

**S172 (m/z=1208.36646; rt=6.57767)**  
T/S Cluster: S-6.6-2

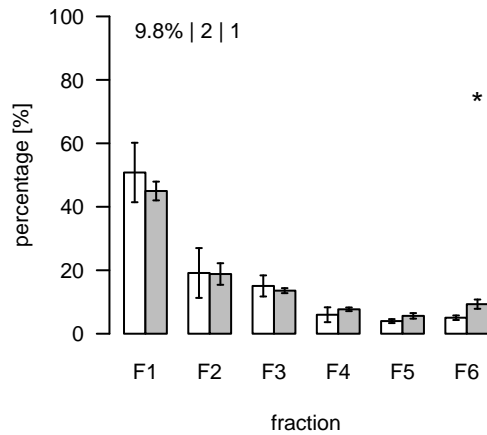

**S177 (m/z=433.102487; rt=6.57942)**  
T/S Cluster: S-6.6-2

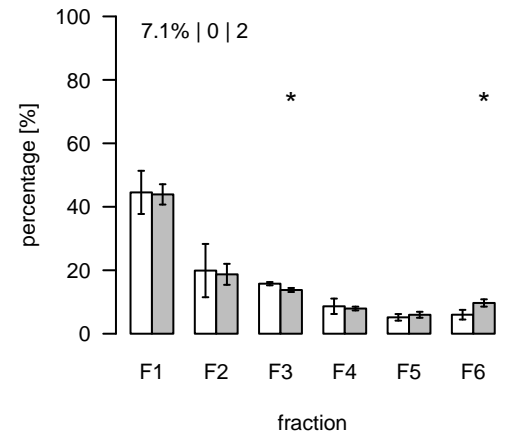

**S174 (m/z=198.38746; rt=6.57798)**  
T/S Cluster: S-6.6-2

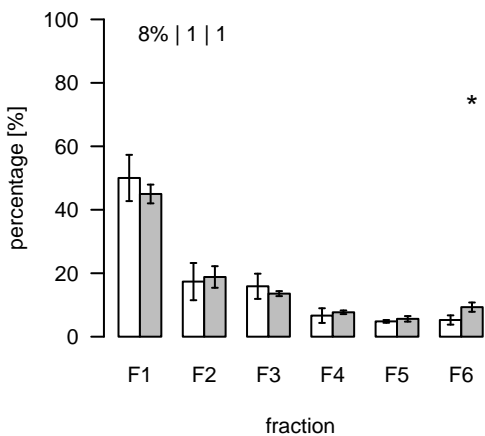

**S175 (m/z=198.395367; rt=6.57809)**  
T/S Cluster: S-6.6-2

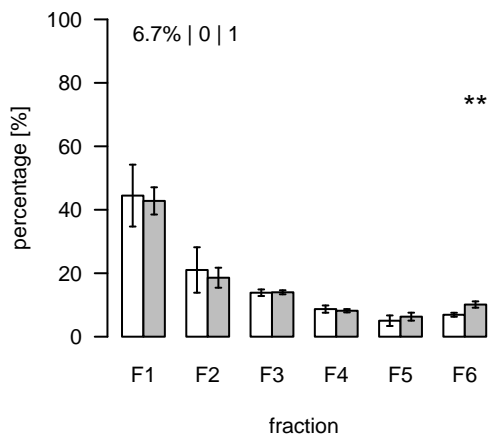

**S188 (m/z=1189.333724; rt=6.58065)**  
T/S Cluster: S-6.6-2

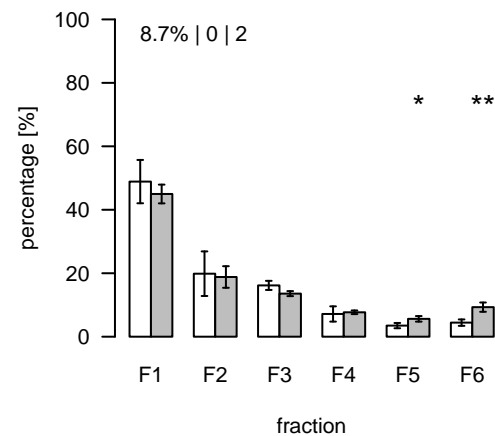

**S170 (m/z=1209.370802; rt=6.57516)**  
T/S Cluster: S-6.6-2

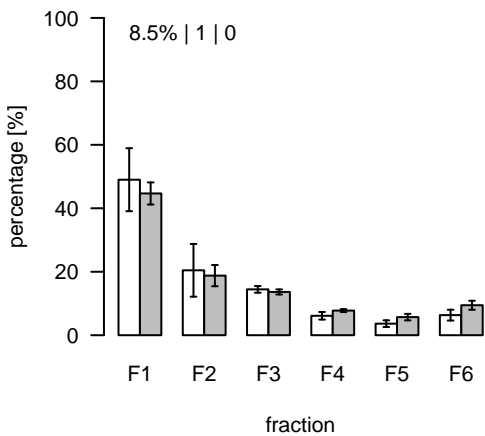

**S176 (m/z=598.176928; rt=6.5791)**  
T/S Cluster: S-6.6-2

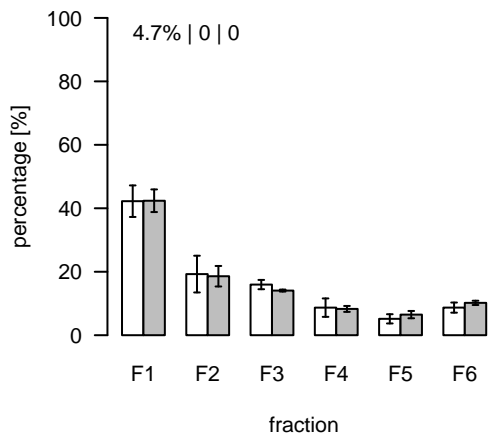

**S189 (m/z=1212.317595; rt=6.58682)**  
T/S Cluster: S-6.6-3

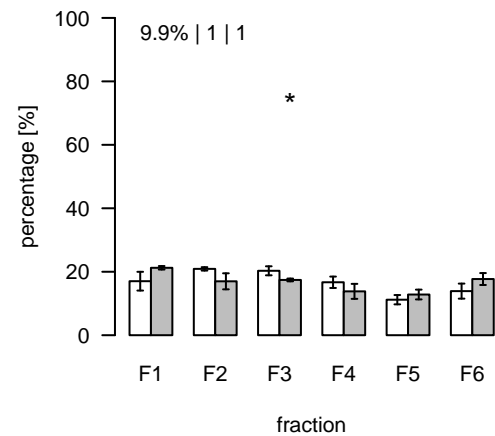

**S190 (m/z=1211.314865; rt=6.58827)**  
T/S Cluster: S-6.6-4

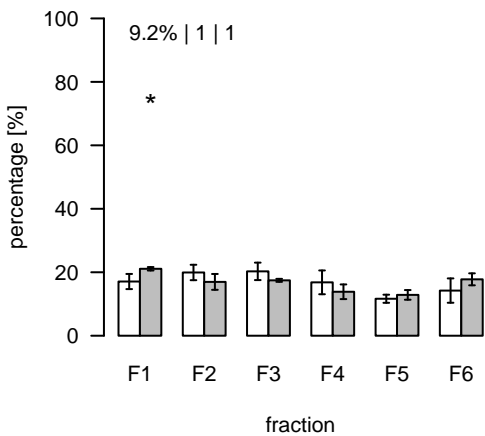

**S191 (m/z=617.150093; rt=6.5895)**  
T/S Cluster: S-6.6-5

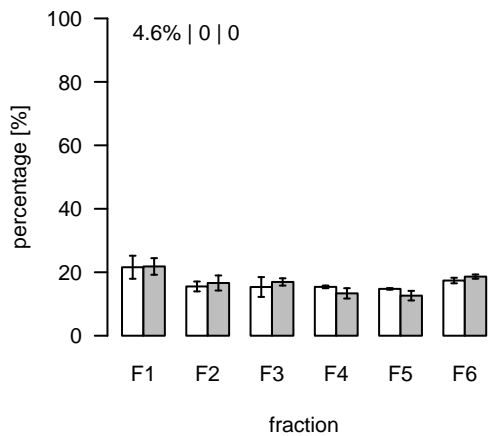

**S192 (m/z=823.75065; rt=6.62862)**  
T/S Cluster: S-6.6-6

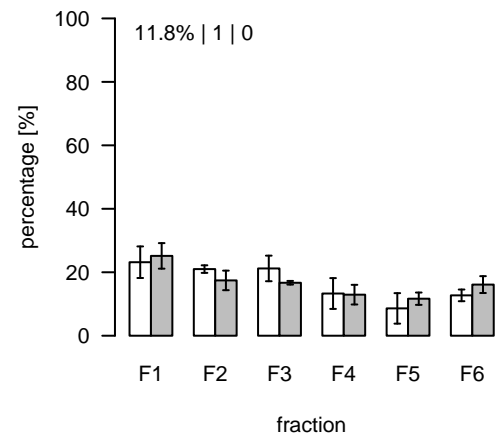

**S193 (m/z=437.767123; rt=6.63104)**  
T/S Cluster: S-6.6-7

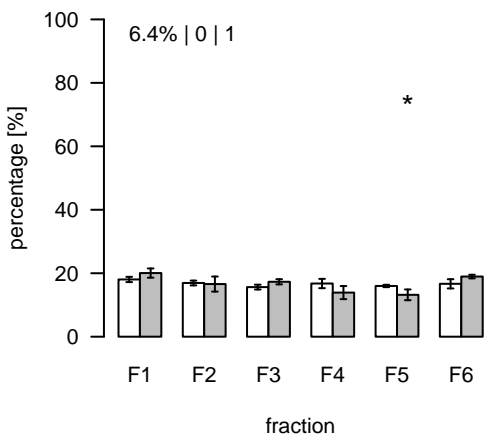

**S195 (m/z=520.33445; rt=6.89864)**  
T/S Cluster: S-6.9-1

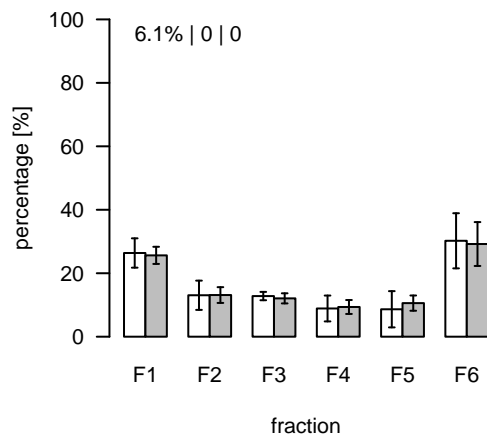

**S194 (m/z=520.32292; rt=6.8981)**  
T/S Cluster: S-6.9-1

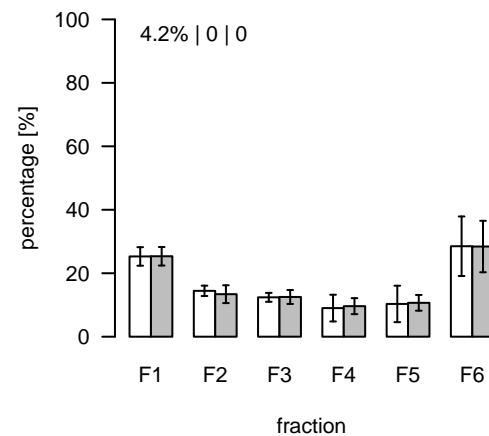

**S196 (m/z=595.167925; rt=6.90063)**  
T/S Cluster: S-6.9-2

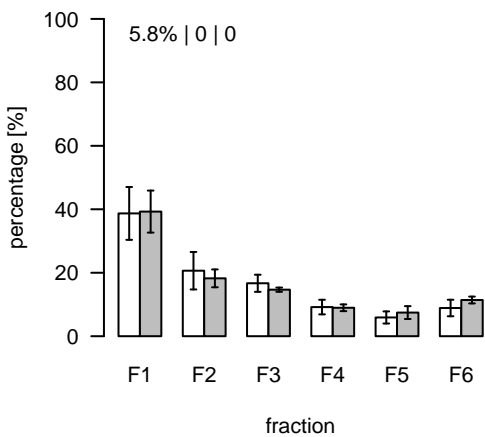

**S197 (m/z=188.110553; rt=6.90602)**  
T/S Cluster: S-6.9-2

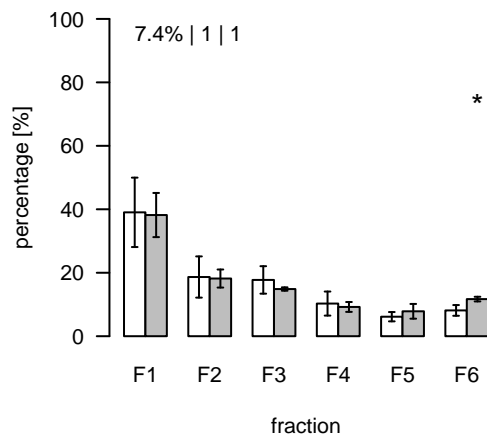

**S198 (m/z=437.738803; rt=6.97285)**  
T/S Cluster: S-7-1

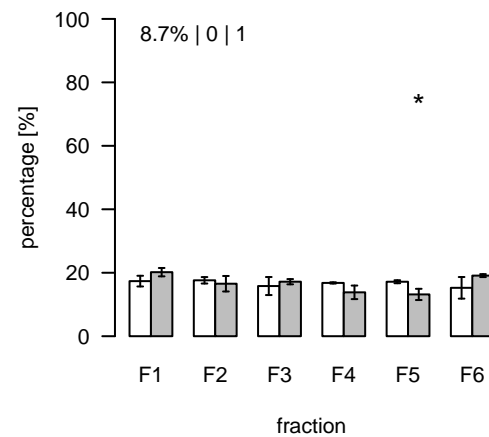

**S199 (m/z=437.779154; rt=7.07829)**  
T/S Cluster: S-7.1-1

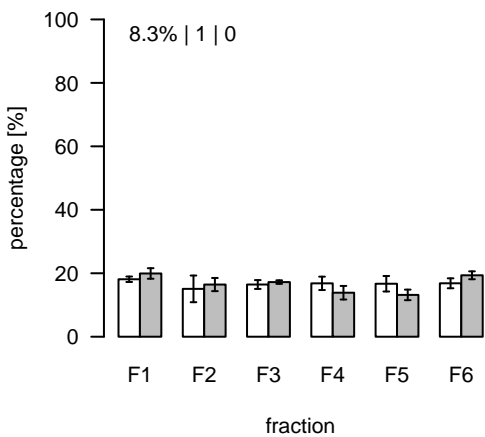

**S201 (m/z=540.245626; rt=7.1058)**  
T/S Cluster: S-7.1-2

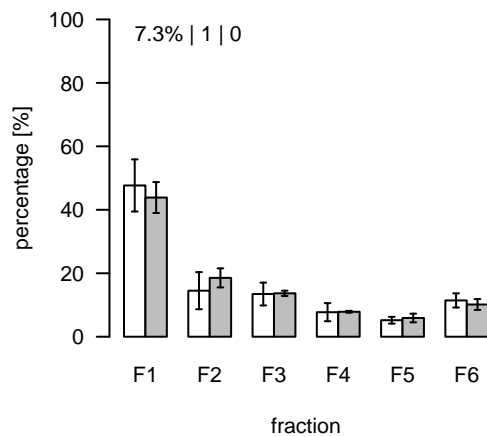

**S200 (m/z=540.22832; rt=7.1049)**  
T/S Cluster: S-7.1-2

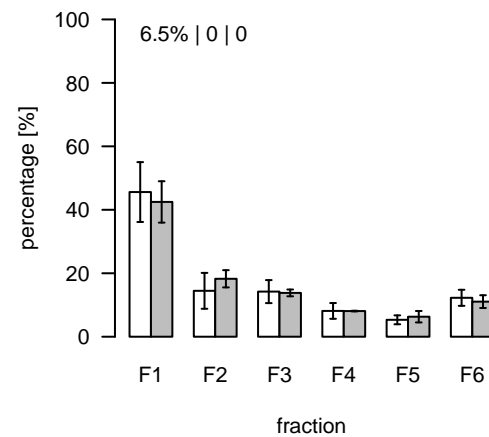

**S236 (m/z=564.360706; rt=7.20053)**  
T/S Cluster: S-7.2-1

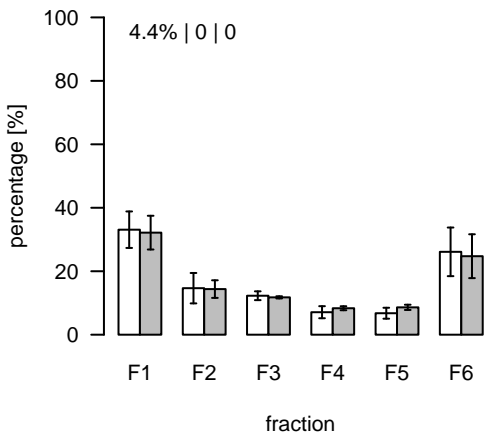

**S202 (m/z=453.344711; rt=7.15643)**  
T/S Cluster: S-7.2-1

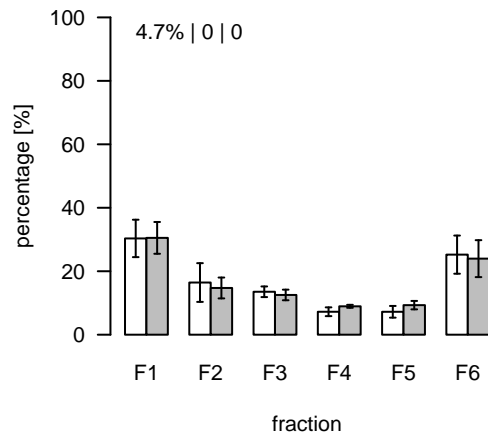

**S233 (m/z=564.333456; rt=7.19925)**  
T/S Cluster: S-7.2-1

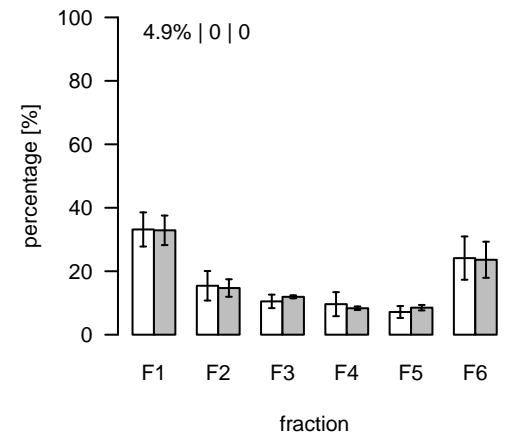

**S237 (m/z=547.334301; rt=7.20078)**  
T/S Cluster: S-7.2-1

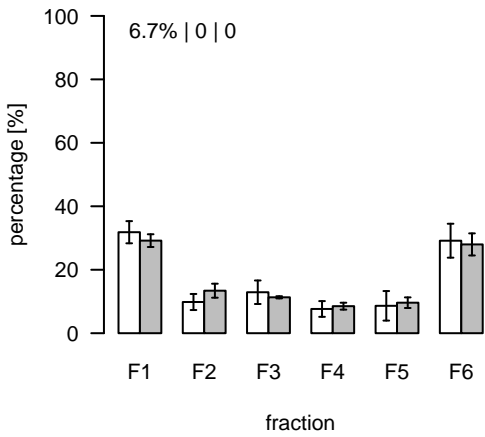

**S235 (m/z=547.319702; rt=7.20005)**  
T/S Cluster: S-7.2-1

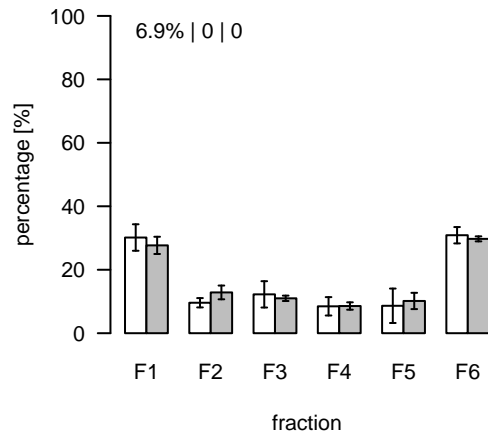

**S234 (m/z=565.364368; rt=7.19981)**  
T/S Cluster: S-7.2-1

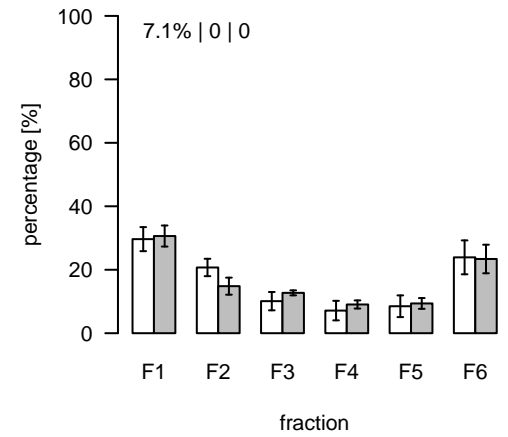

**S220 (m/z=579.172002; rt=7.19576)**  
T/S Cluster: S-7.2-2

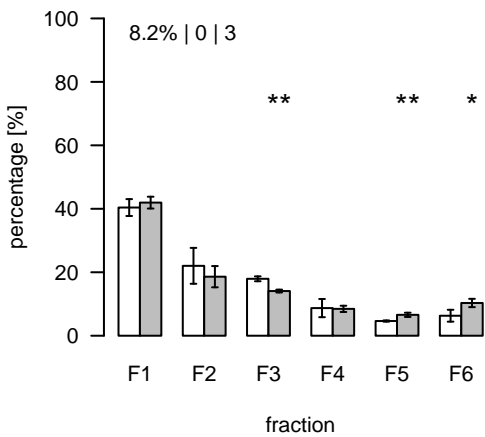

**S219 (m/z=580.176219; rt=7.1957)**  
T/S Cluster: S-7.2-2

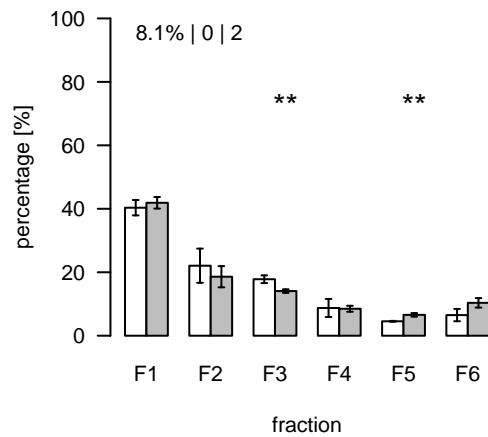

**S211 (m/z=1157.340913; rt=7.1943)**  
T/S Cluster: S-7.2-2

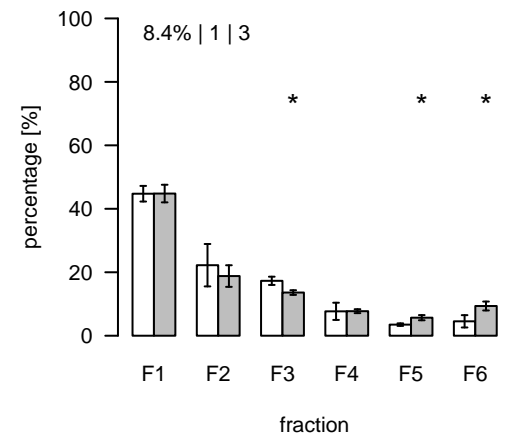

**S225 (m/z=289.58699; rt=7.19584)**  
T/S Cluster: S-7.2-2

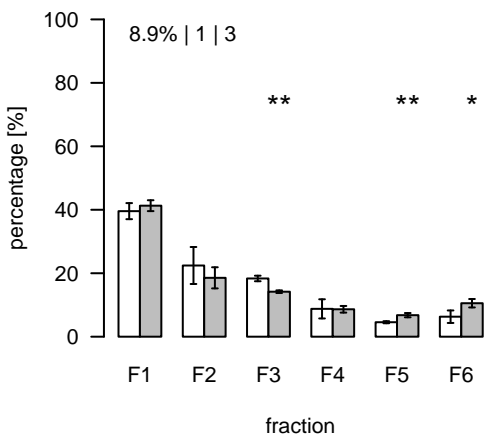

**S224 (m/z=433.113817; rt=7.19584)**  
T/S Cluster: S-7.2-2

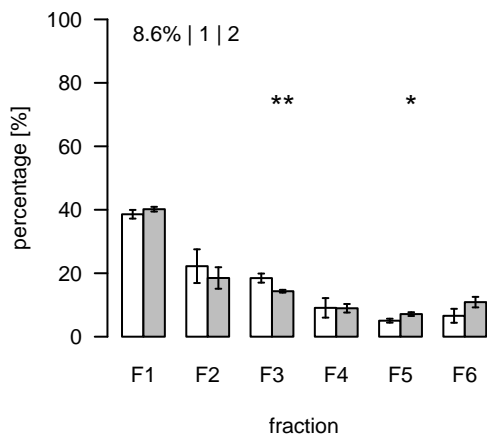

**S210 (m/z=1158.344292; rt=7.19403)**  
T/S Cluster: S-7.2-2

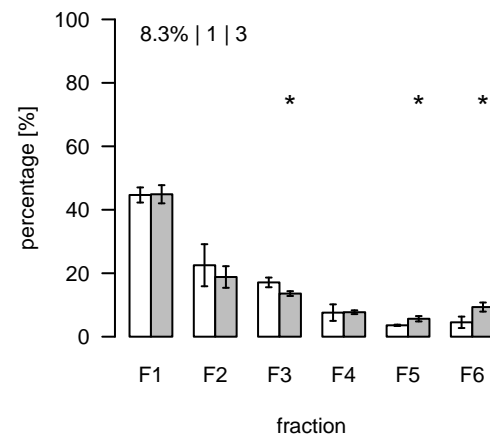

**S222 (m/z=581.179229; rt=7.1958)**  
T/S Cluster: S-7.2-2

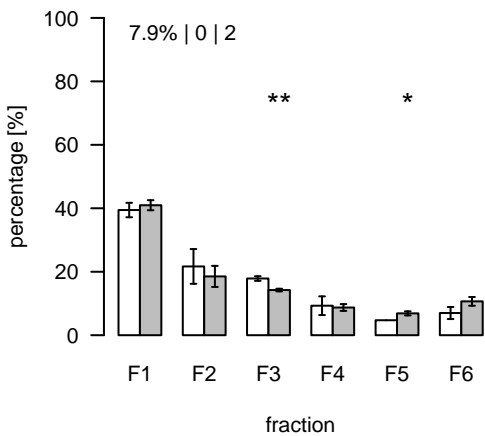

**S205 (m/z=1174.367296; rt=7.19304)**  
T/S Cluster: S-7.2-2

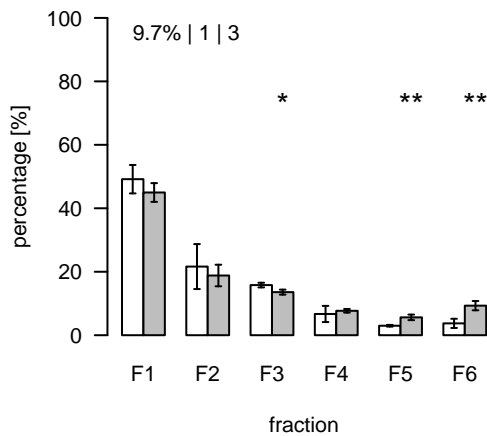

**S230 (m/z=287.055582; rt=7.19679)**  
T/S Cluster: S-7.2-2

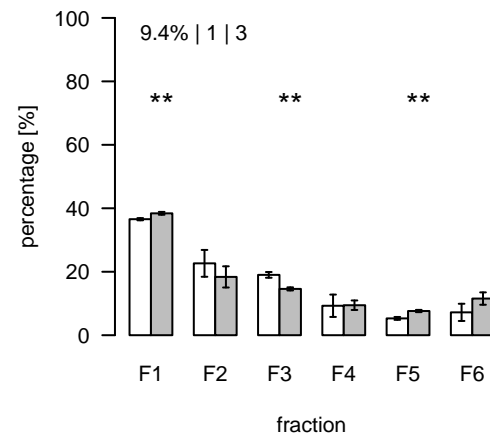

**S218 (m/z=193.059844; rt=7.19547)**  
T/S Cluster: S-7.2-2

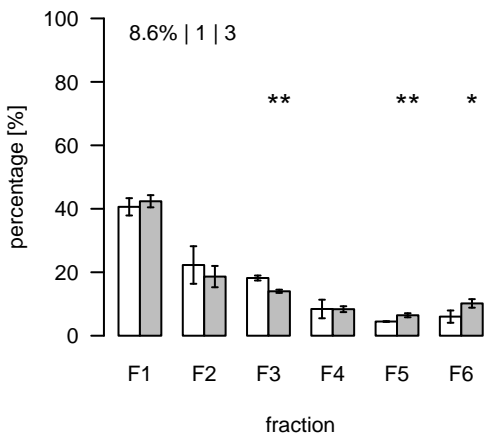

**S209 (m/z=1159.348552; rt=7.19387)**  
T/S Cluster: S-7.2-2

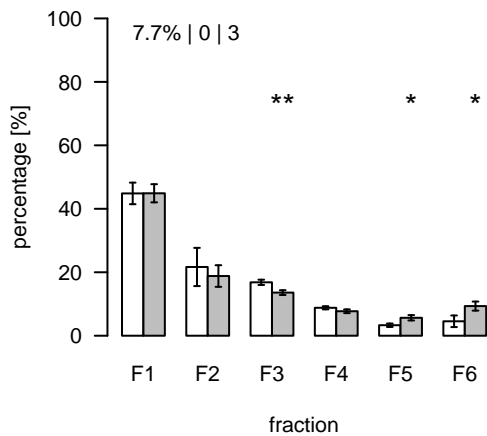

**S223 (m/z=290.088781; rt=7.19582)**  
T/S Cluster: S-7.2-2

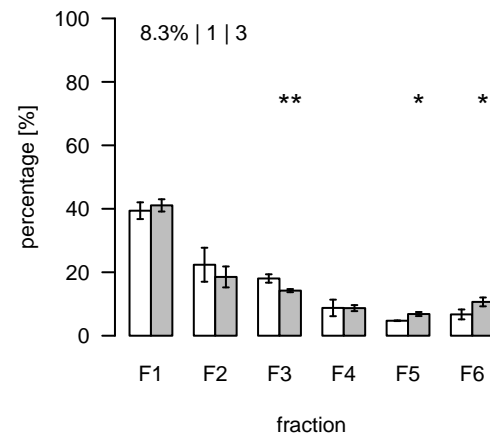

**S204 (m/z=1175.371104; rt=7.19295)**  
T/S Cluster: S-7.2-2

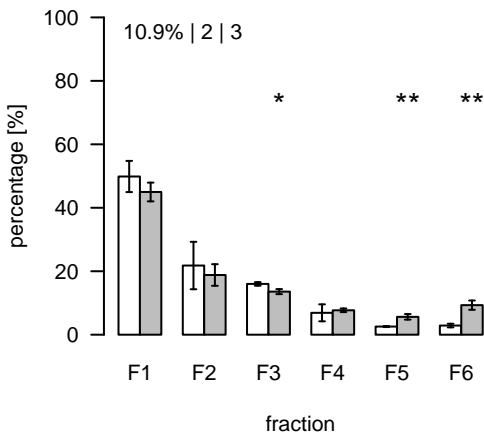

**S231 (m/z=287.051025; rt=7.1968)**  
T/S Cluster: S-7.2-2

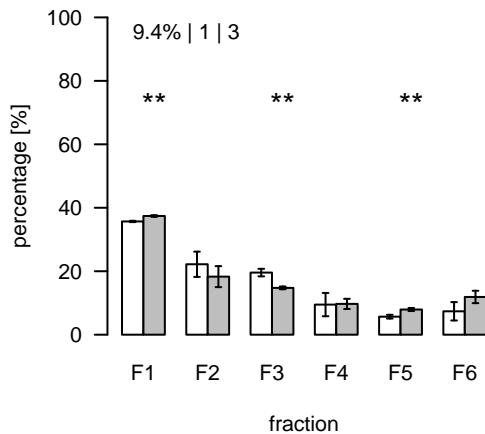

**S228 (m/z=434.1174; rt=7.1961)**  
T/S Cluster: S-7.2-2

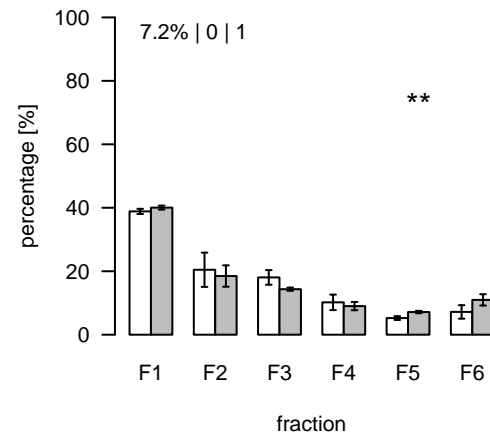

**S208 (m/z=578.67299; rt=7.19378)**  
T/S Cluster: S-7.2-2

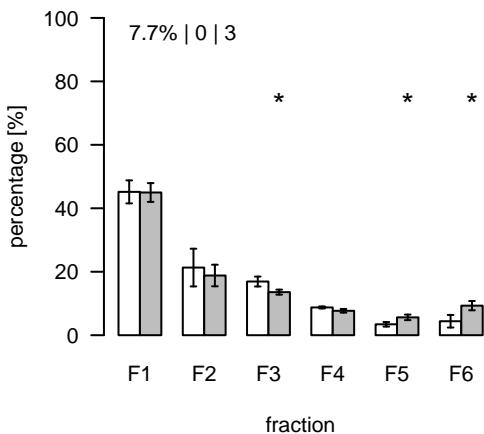

**S214 (m/z=582.181567; rt=7.19523)**  
T/S Cluster: S-7.2-2

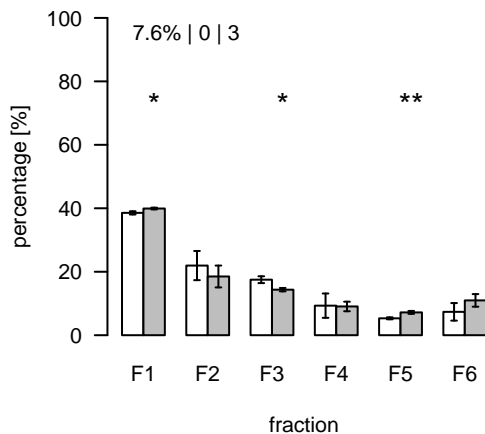

**S238 (m/z=601.154996; rt=7.20155)**  
T/S Cluster: S-7.2-2

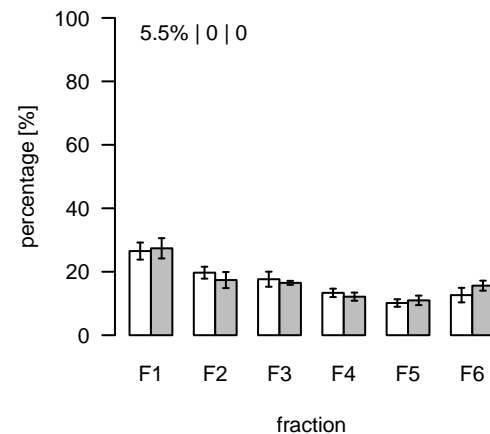

**S216 (m/z=581.154234; rt=7.19543)**  
T/S Cluster: S-7.2-2

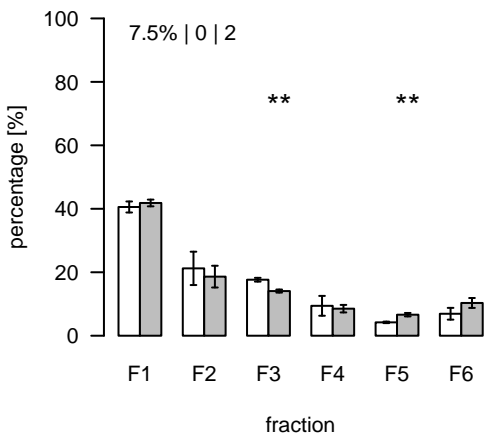

**S227 (m/z=216.55738; rt=7.19597)**  
T/S Cluster: S-7.2-2

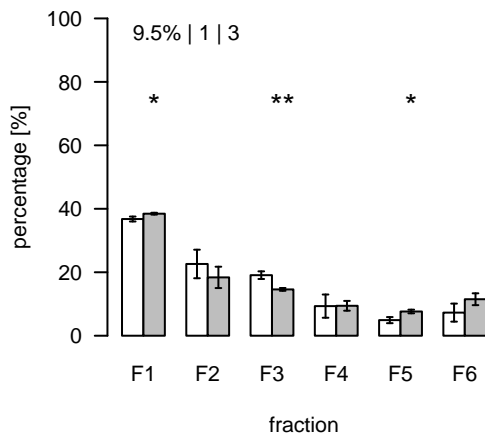

**S215 (m/z=433.096403; rt=7.19527)**  
T/S Cluster: S-7.2-2

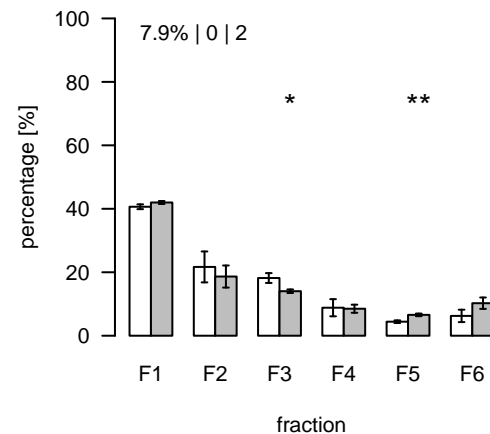



**S217 (m/z=193.394297; rt=7.19547)**  
T/S Cluster: S-7.2-2

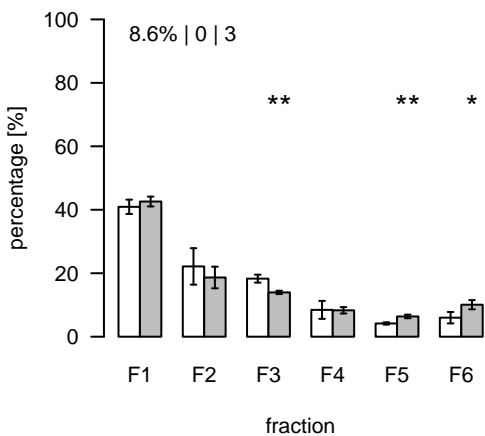

**S229 (m/z=290.5894; rt=7.19631)**  
T/S Cluster: S-7.2-2

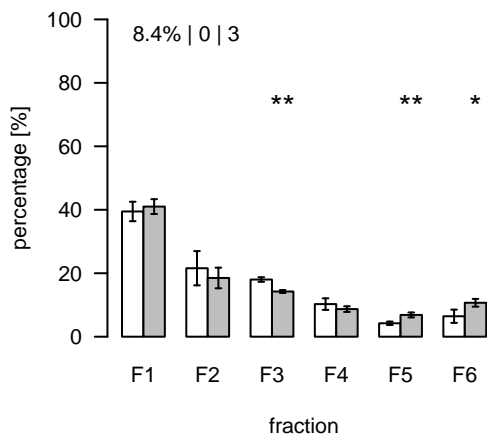

**S221 (m/z=290.592957; rt=7.19578)**  
T/S Cluster: S-7.2-2

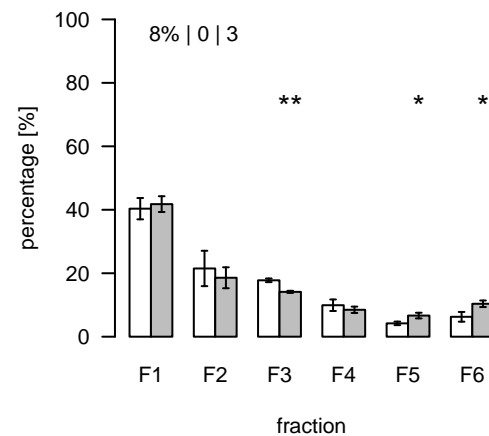

**S213 (m/z=193.055162; rt=7.19472)**  
T/S Cluster: S-7.2-2

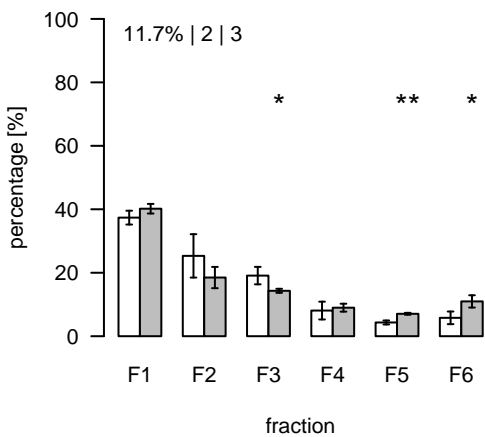

**S203 (m/z=193.064387; rt=7.19262)**  
T/S Cluster: S-7.2-2

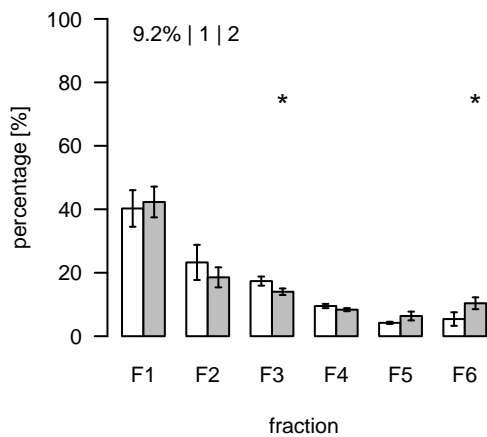

**S212 (m/z=193.397155; rt=7.1947)**  
T/S Cluster: S-7.2-2

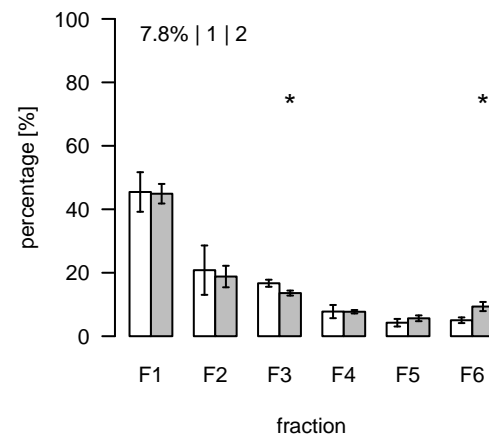

**S207 (m/z=1160.350483; rt=7.19377)**  
T/S Cluster: S-7.2-2

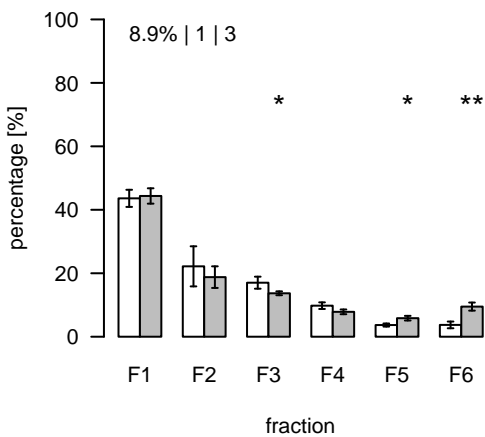

**S206 (m/z=1176.374494; rt=7.19323)**  
T/S Cluster: S-7.2-2

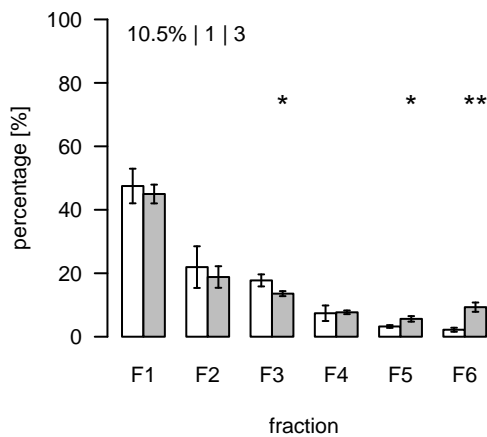

**S241 (m/z=506.167432; rt=7.24815)**  
T/S Cluster: S-7.2-2

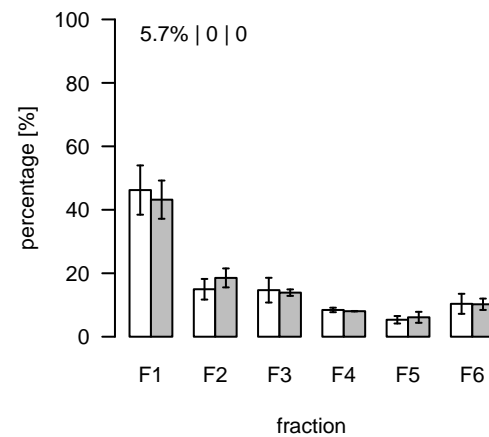

**S226 (m/z=289.573397; rt=7.19596)**  
T/S Cluster: S-7.2-2

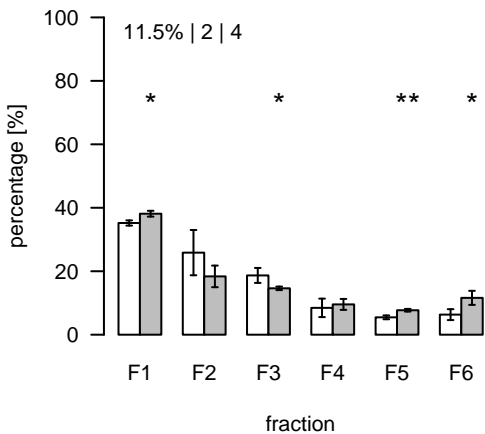

**S232 (m/z=214.089877; rt=7.19756)**  
T/S Cluster: S-7.2-3

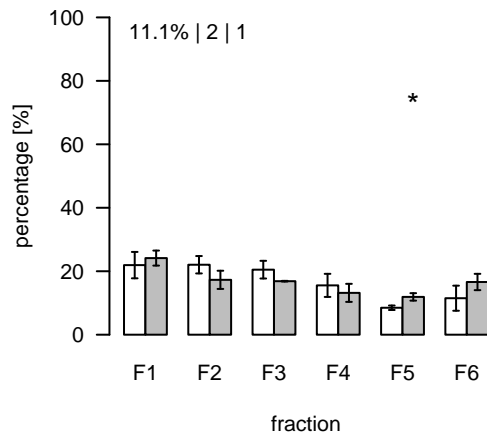

**S239 (m/z=1180.326145; rt=7.20402)**  
T/S Cluster: S-7.2-4

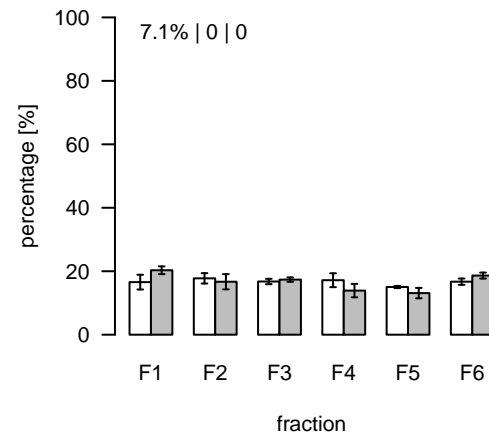

**S240 (m/z=1179.322348; rt=7.20609)**  
T/S Cluster: S-7.2-5

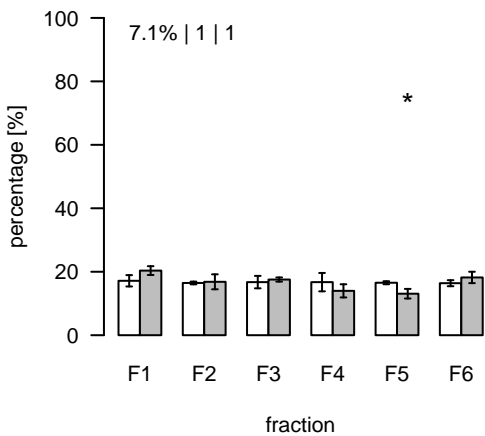

**S242 (m/z=736.320535; rt=7.30997)**  
T/S Cluster: S-7.3-1

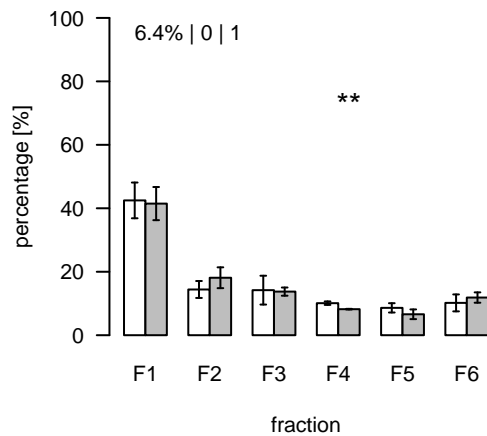

**S243 (m/z=736.320516; rt=7.30997)**  
T/S Cluster: S-7.3-1

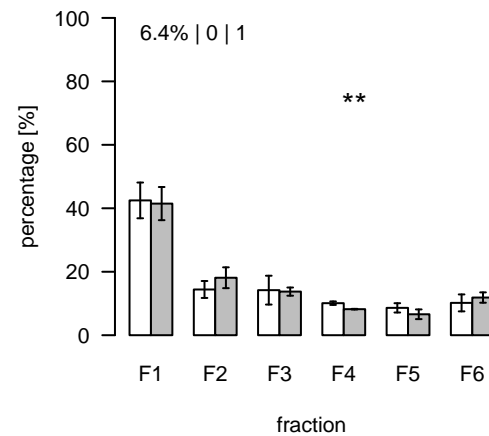

**S244 (m/z=437.783631; rt=7.32108)**  
T/S Cluster: S-7.3-2

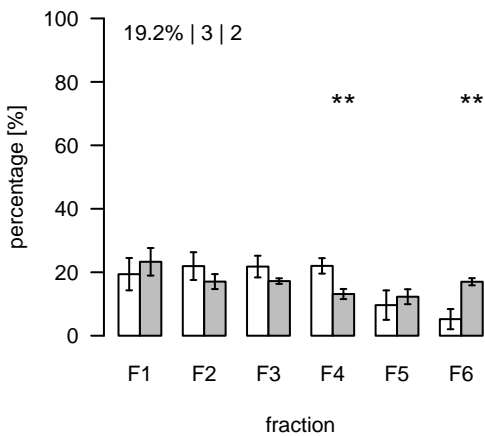

**S245 (m/z=239.042175; rt=7.40468)**  
T/S Cluster: S-7.4-1

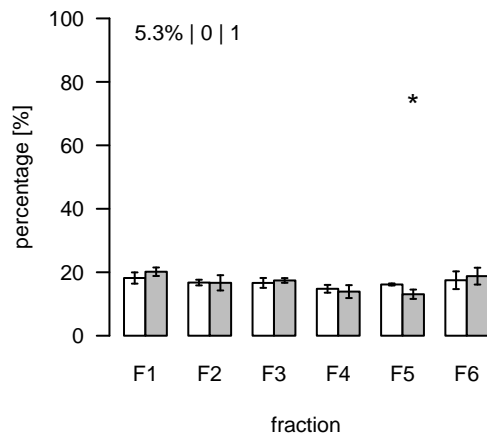

**S246 (m/z=736.319899; rt=7.42697)**  
T/S Cluster: S-7.4-2

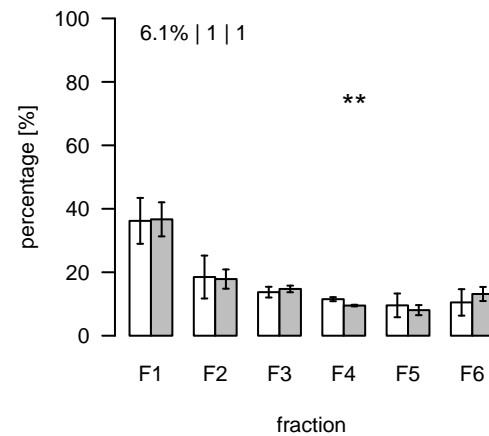

**S247 (m/z=736.320097; rt=7.43214)**  
T/S Cluster: S-7.4-2

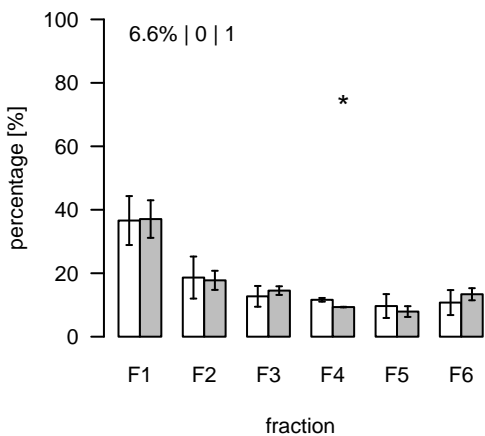

**S248 (m/z=736.320503; rt=7.44929)**  
T/S Cluster: S-7.4-2

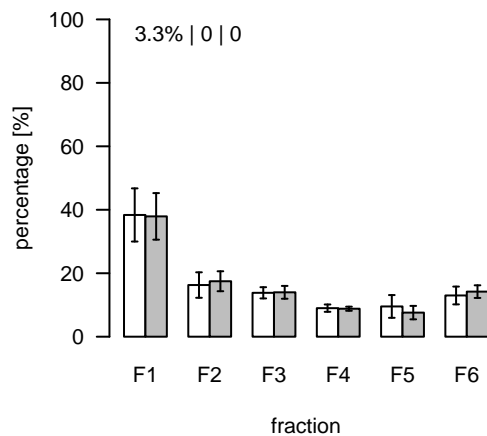

**S252 (m/z=608.3877; rt=7.49402)**  
T/S Cluster: S-7.5-1

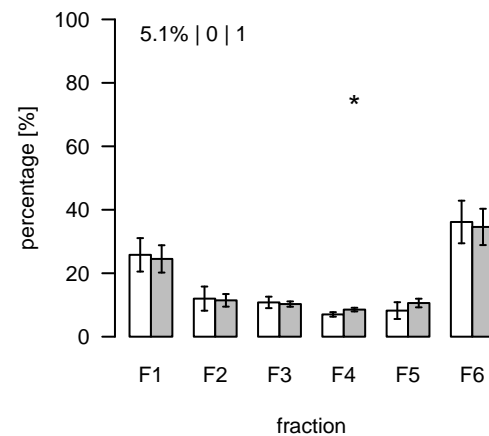

**S251 (m/z=608.356404; rt=7.49364)**  
T/S Cluster: S-7.5-1

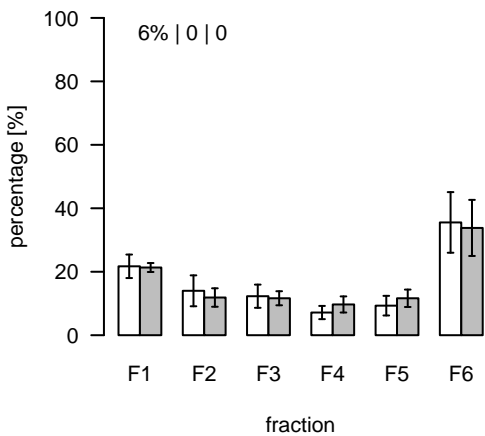

**S250 (m/z=609.391668; rt=7.49334)**  
T/S Cluster: S-7.5-1

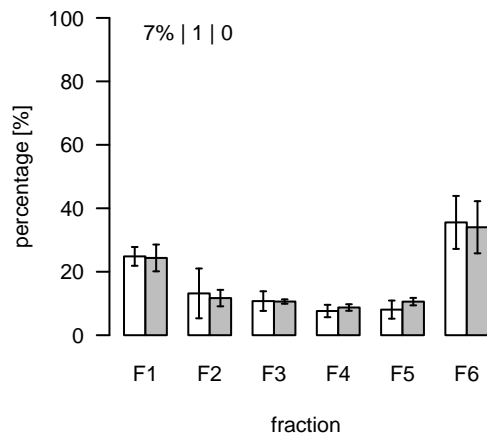

**S249 (m/z=609.373956; rt=7.4933)**  
T/S Cluster: S-7.5-1

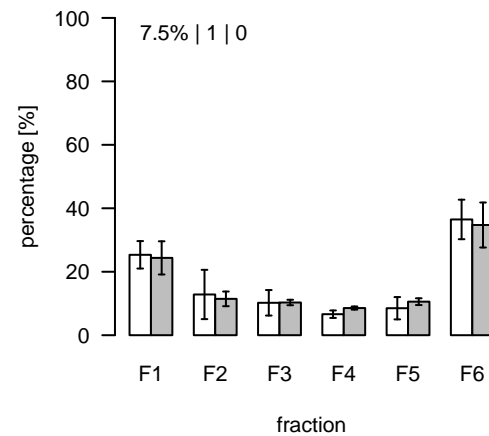

**S253 (m/z=579.172686; rt=7.52621)**  
T/S Cluster: S-7.5-2

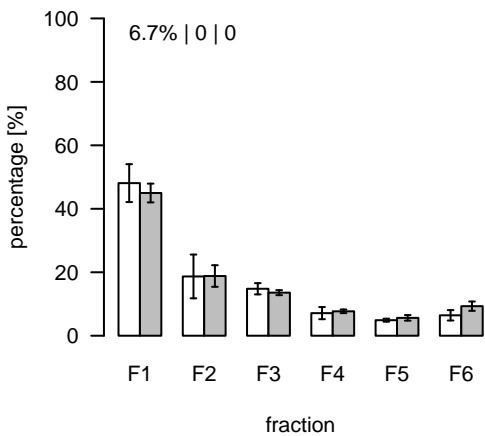

**S254 (m/z=580.17651; rt=7.52735)**  
T/S Cluster: S-7.5-2

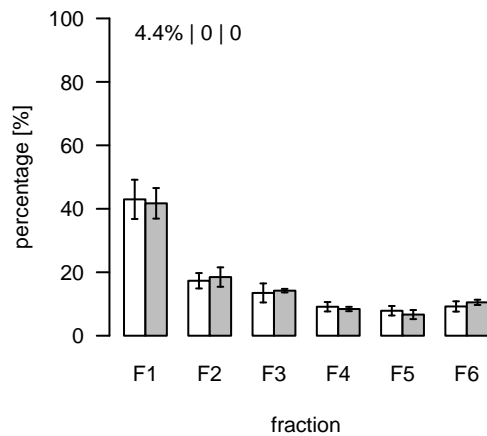

**S255 (m/z=437.732726; rt=7.55741)**  
T/S Cluster: S-7.6-1

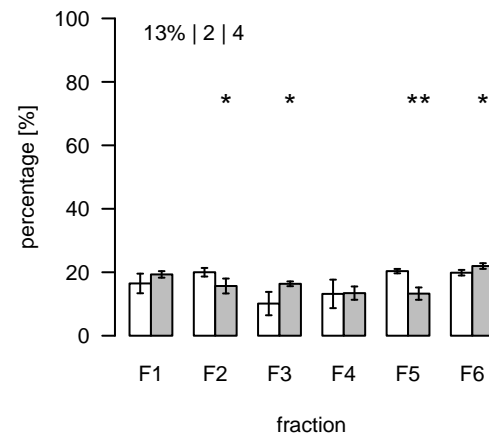

**S258 (m/z=538.230008; rt=7.74501)**  
T/S Cluster: S-7.7-1

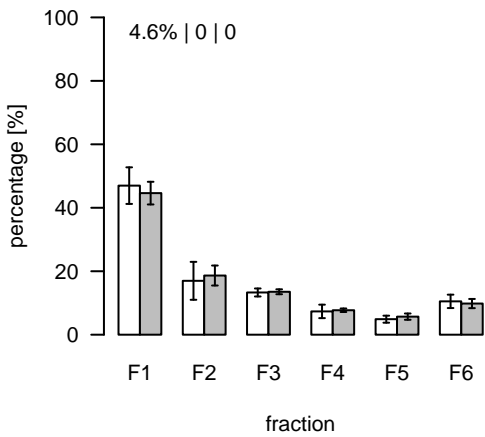

**S257 (m/z=538.213867; rt=7.74468)**  
T/S Cluster: S-7.7-1

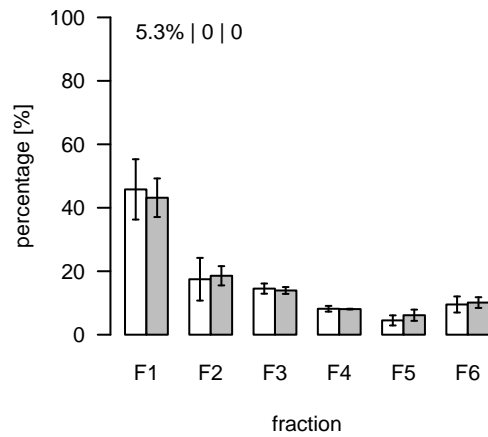

**S256 (m/z=538.229835; rt=7.72462)**  
T/S Cluster: S-7.7-1

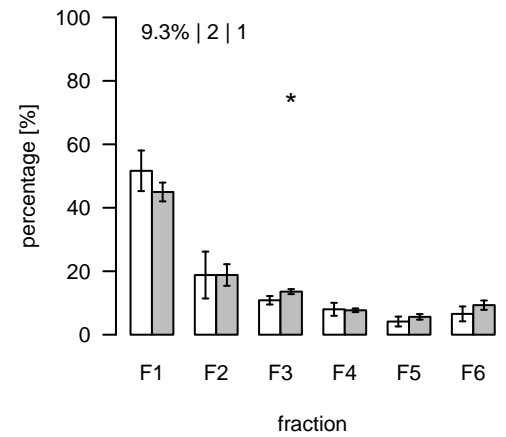

**S259 (m/z=652.414103; rt=7.7598)**  
T/S Cluster: S-7.8-1

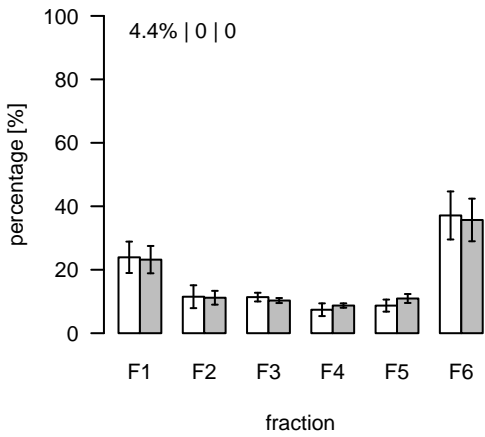

**S260 (m/z=652.413965; rt=7.7598)**  
T/S Cluster: S-7.8-1

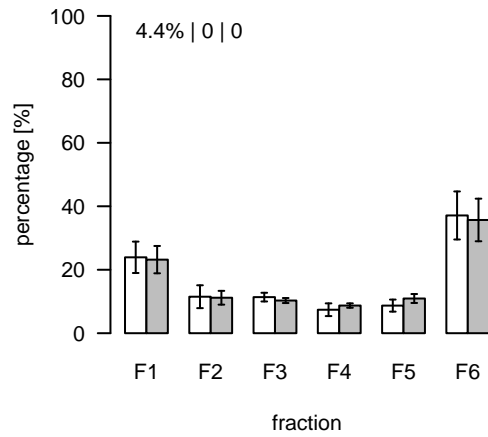

**S261 (m/z=653.417603; rt=7.76131)**  
T/S Cluster: S-7.8-1

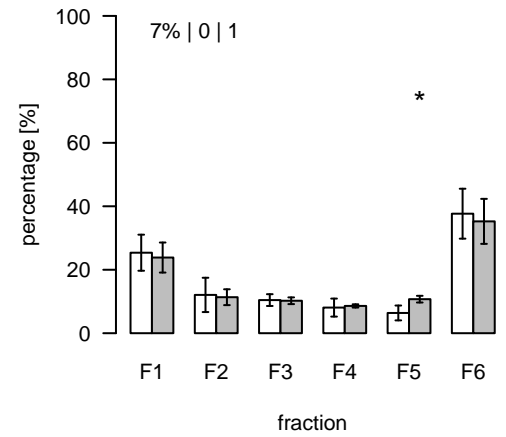

**S262 (m/z=653.417701; rt=7.77198)**  
T/S Cluster: S-7.8-1

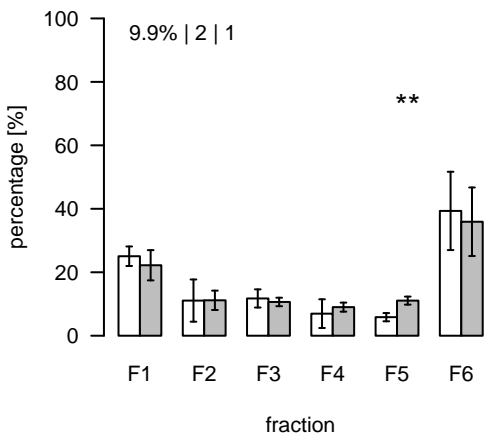

**S263 (m/z=560.235322; rt=7.8867)**  
T/S Cluster: S-7.9-1

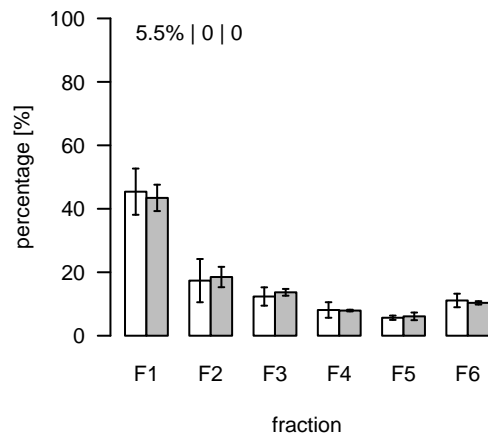

**S264 (m/z=437.752657; rt=7.99269)**  
T/S Cluster: S-8-1

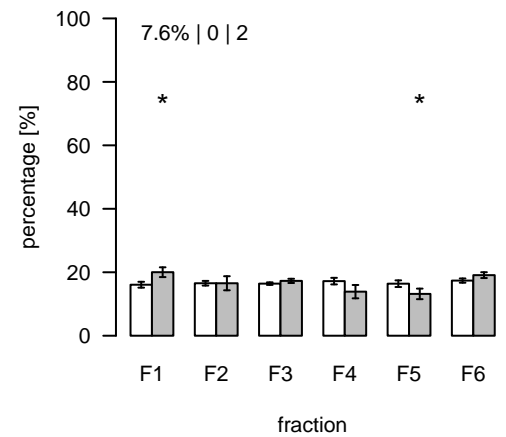

**S265 (m/z=696.440768; rt=8.00195)**  
T/S Cluster: S-8-2

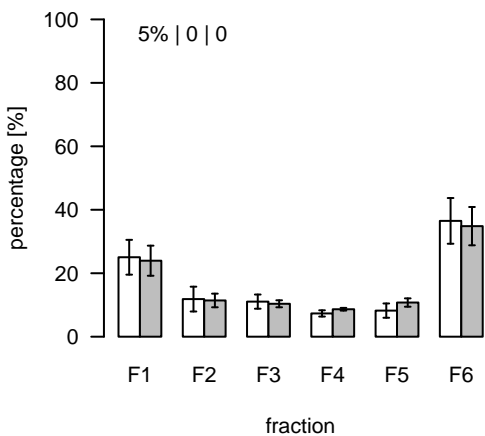

**S266 (m/z=696.397772; rt=8.00334)**  
T/S Cluster: S-8-2

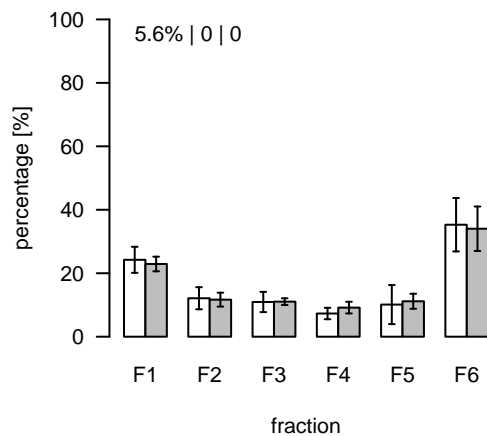

**S267 (m/z=697.443862; rt=8.00567)**  
T/S Cluster: S-8-2

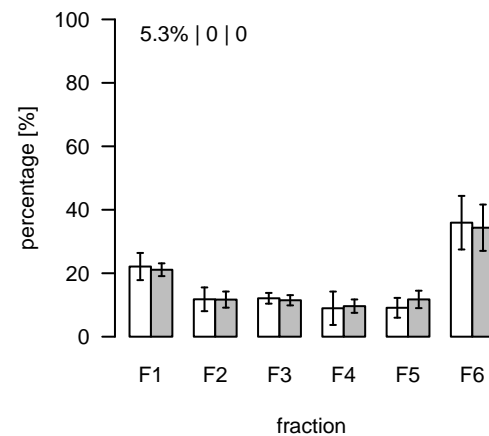

**S268 (m/z=697.413224; rt=8.00757)**  
T/S Cluster: S-8-2

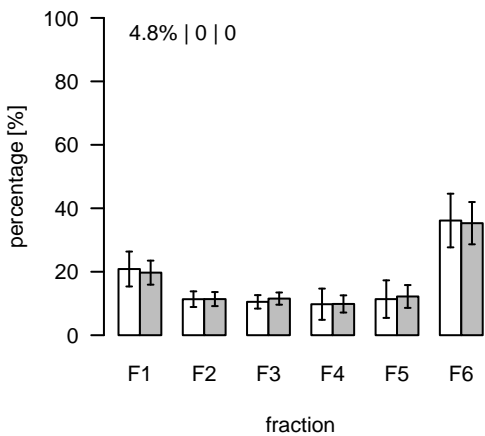

**S270 (m/z=461.211832; rt=8.04898)**  
T/S Cluster: S-8-3

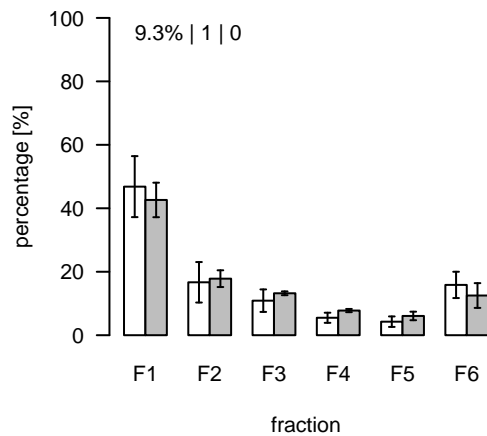

**S269 (m/z=461.211675; rt=8.03358)**  
T/S Cluster: S-8-3

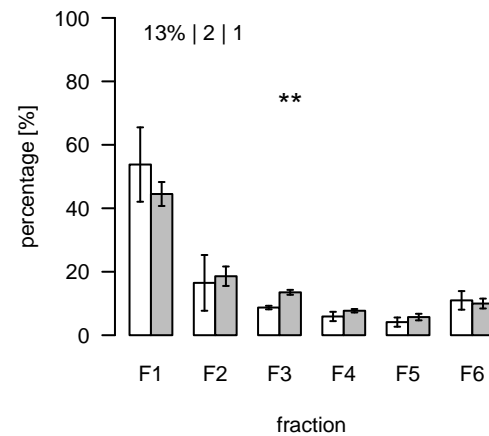

**S271 (m/z=456.256384; rt=8.06096)**  
T/S Cluster: S-8.1-1

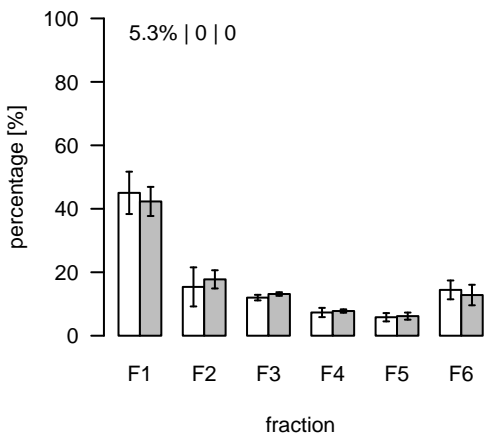

**S272 (m/z=437.788924; rt=8.12134)**  
T/S Cluster: S-8.1-2

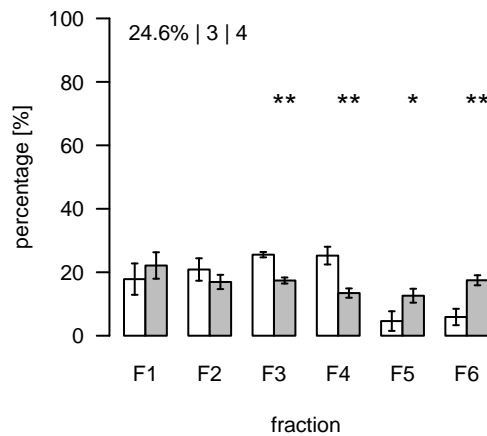

**S274 (m/z=740.467295; rt=8.22319)**  
T/S Cluster: S-8.2-1

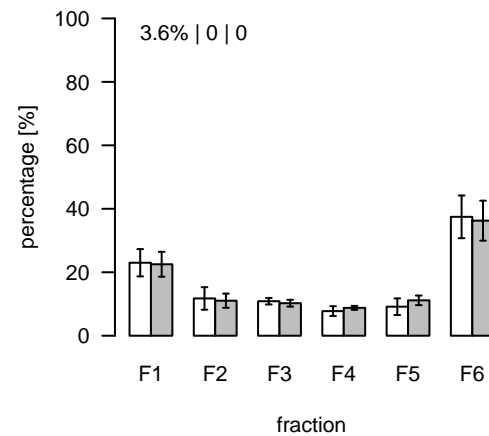

**S273 (m/z=741.47015; rt=8.22269)**  
T/S Cluster: S-8.2-1

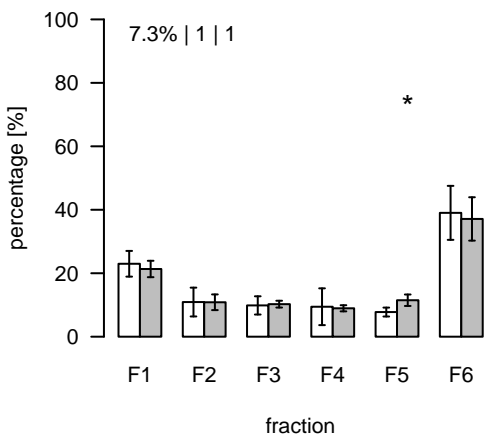

**S275 (m/z=437.736115; rt=8.29717)**  
T/S Cluster: S-8.3-1

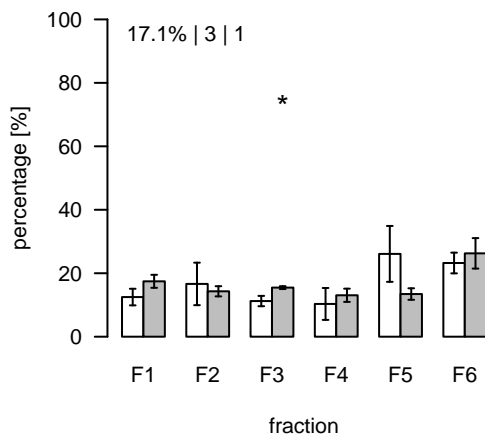

**S276 (m/z=784.493252; rt=8.42519)**  
T/S Cluster: S-8.4-1

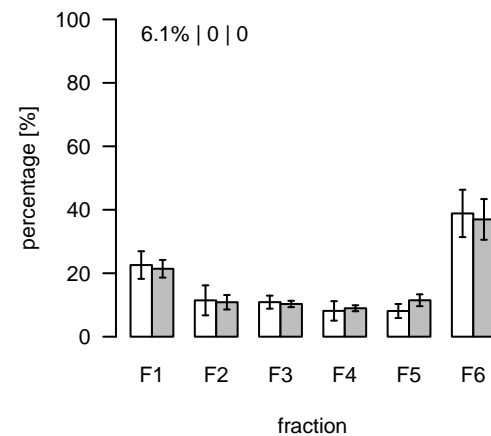

**S277 (m/z=785.496959; rt=8.42642)**  
T/S Cluster: S-8.4-1

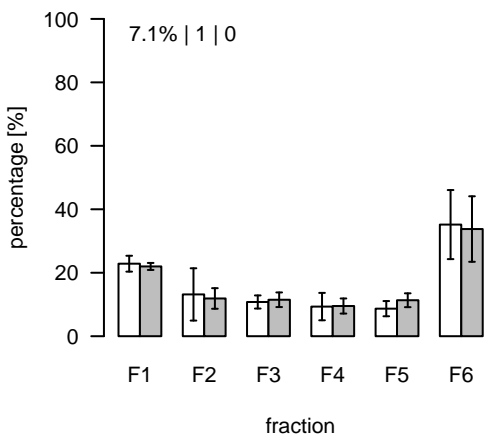

**S279 (m/z=610.215586; rt=8.42876)**  
T/S Cluster: S-8.4-2

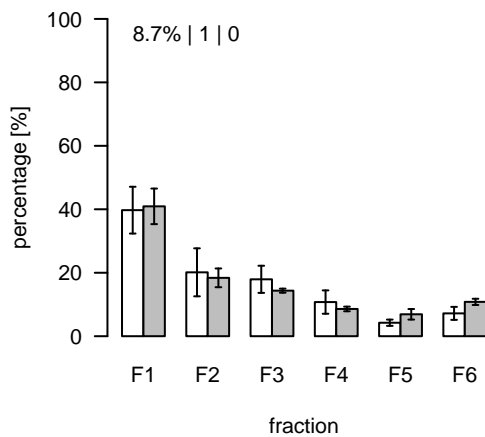

**S280 (m/z=610.215452; rt=8.42883)**  
T/S Cluster: S-8.4-2

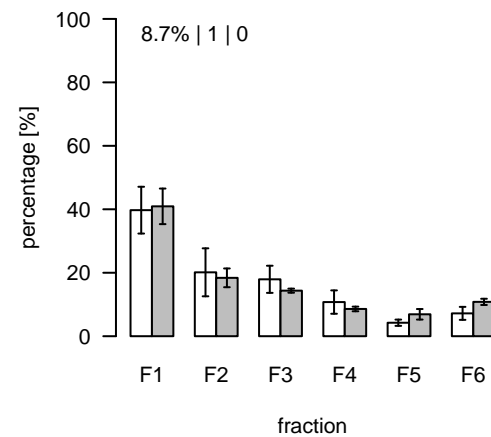

**S278 (m/z=610.192416; rt=8.42829)**  
T/S Cluster: S-8.4-2

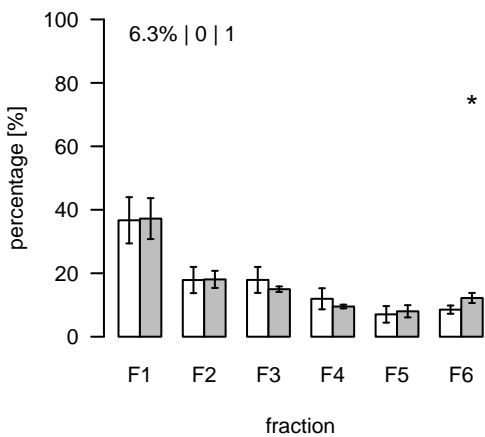

**S282 (m/z=202.12621; rt=8.53188)**  
T/S Cluster: S-8.5-1

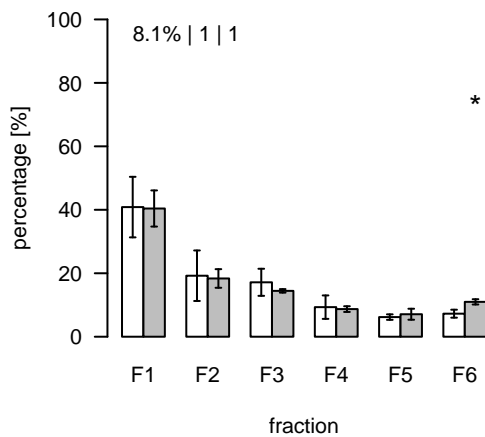

**S285 (m/z=138.12765; rt=8.53306)**  
T/S Cluster: S-8.5-1

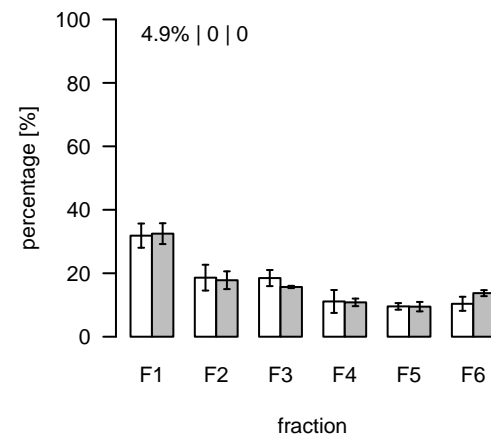

**S281 (m/z=202.123209; rt=8.5313)**  
T/S Cluster: S-8.5-1

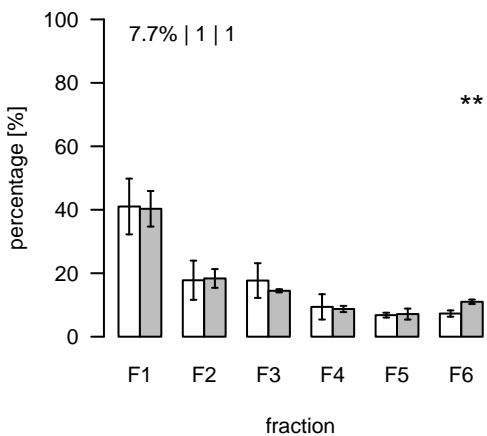

**S284 (m/z=138.126683; rt=8.53299)**  
T/S Cluster: S-8.5-1

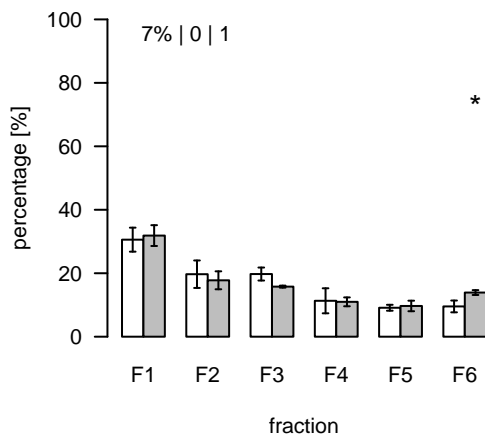

**S283 (m/z=101.063199; rt=8.5328)**  
T/S Cluster: S-8.5-1

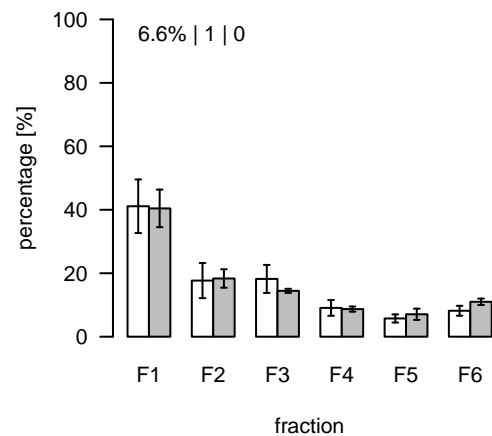

**S286 (m/z=437.727472; rt=8.56096)**  
T/S Cluster: S-8.6-1

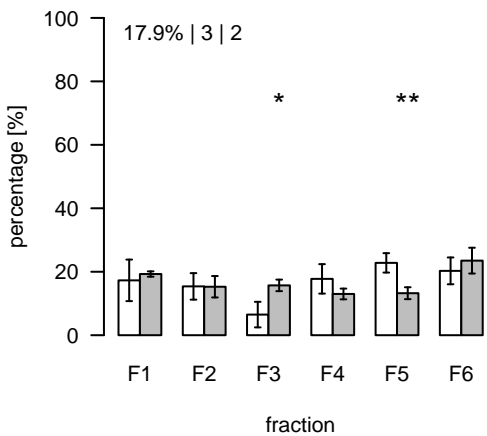

**S287 (m/z=437.781162; rt=8.57258)**  
T/S Cluster: S-8.6-2

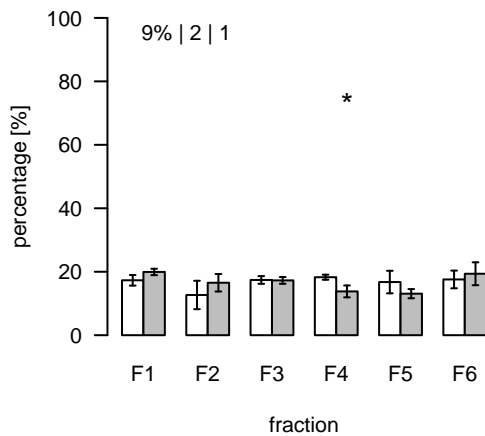

**S288 (m/z=828.519036; rt=8.61841)**  
T/S Cluster: S-8.6-3

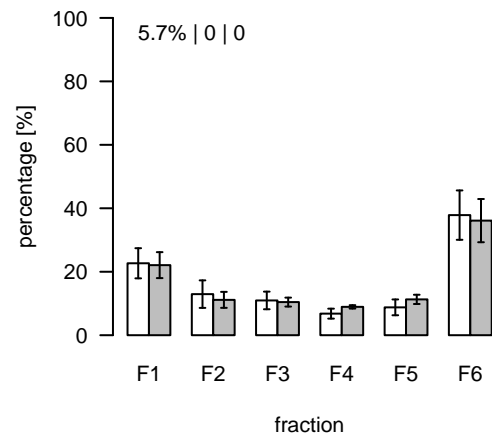

**S290 (m/z=305.107354; rt=8.72299)**  
T/S Cluster: S-8.7-1

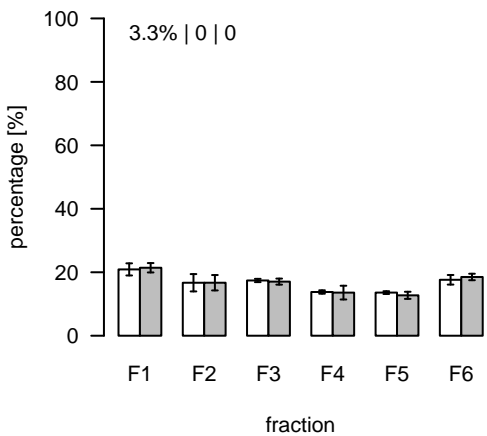

**S289 (m/z=305.102564; rt=8.72237)**  
T/S Cluster: S-8.7-1

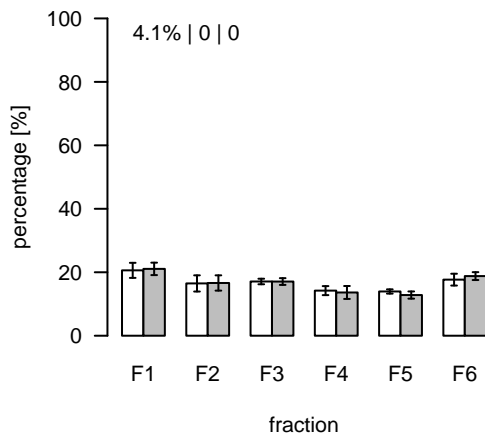

**S292 (m/z=246.058657; rt=8.7245)**  
T/S Cluster: S-8.7-2

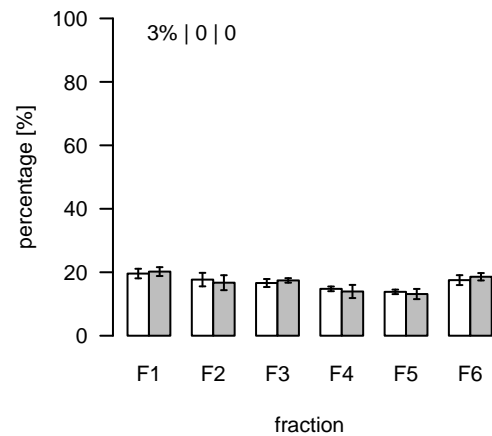

**S291 (m/z=246.05456; rt=8.72365)**  
T/S Cluster: S-8.7-2

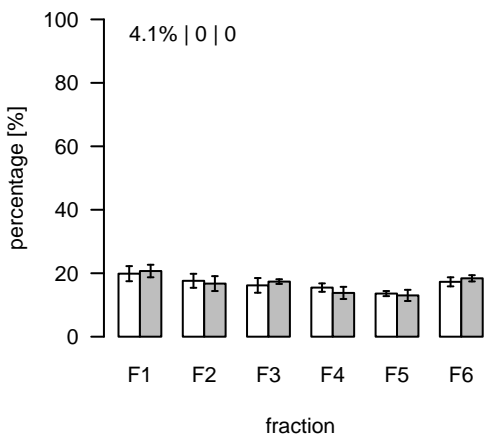

**S293 (m/z=872.545735; rt=8.80174)**  
T/S Cluster: S-8.8-1

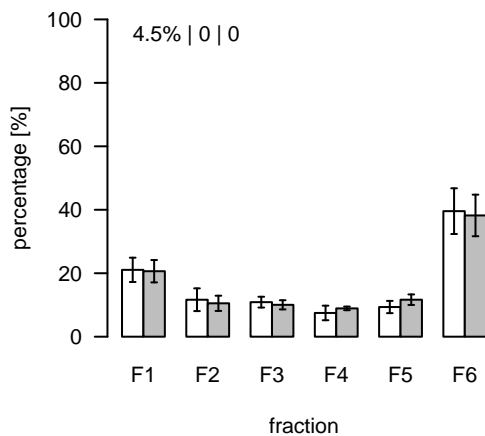

**S294 (m/z=916.572266; rt=8.97605)**  
T/S Cluster: S-9-1

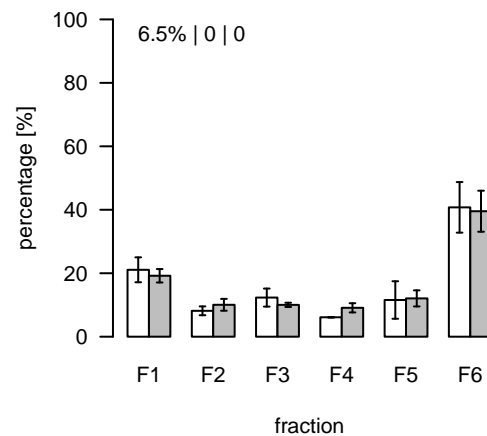

**S295 (m/z=916.57238; rt=8.98074)**  
T/S Cluster: S-9-1

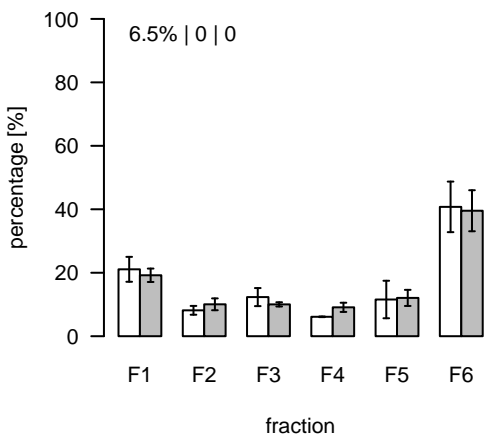

**S296 (m/z=437.736581; rt=9.01797)**  
T/S Cluster: S-9-2

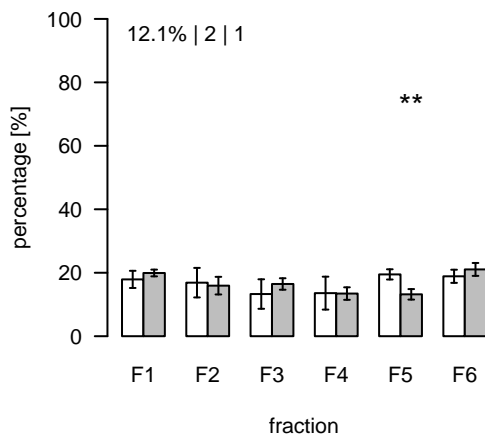

**S297 (m/z=437.787857; rt=9.03433)**  
T/S Cluster: S-9-3

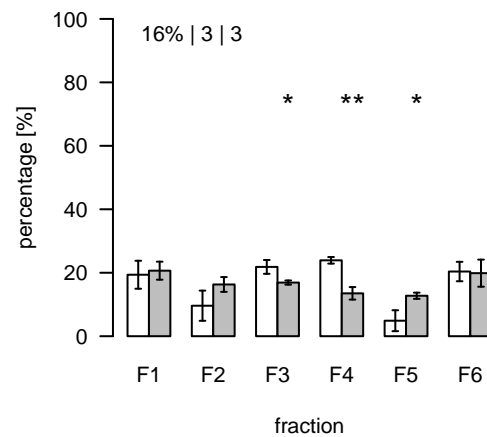

**S298 (m/z=823.774517; rt=9.0965)**  
T/S Cluster: S-9.1-1

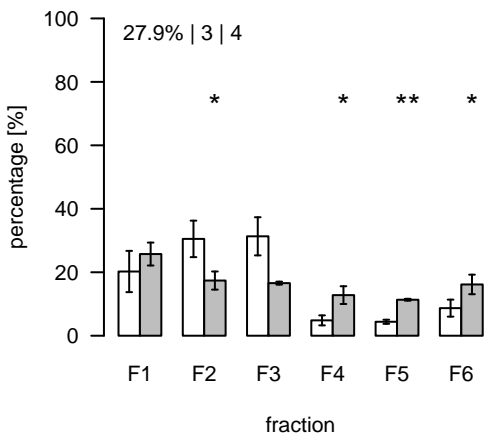

**S299 (m/z=584.293593; rt=9.40551)**  
T/S Cluster: S-9.4-1

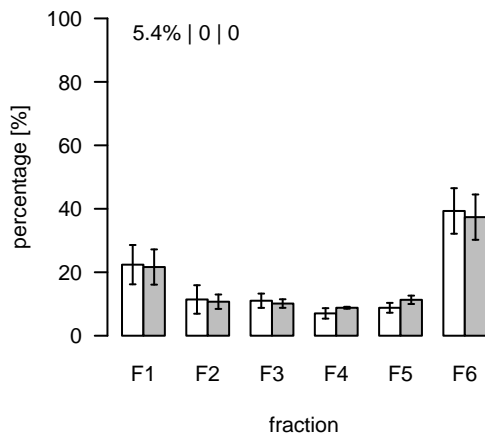

**S300 (m/z=585.296598; rt=9.40689)**  
T/S Cluster: S-9.4-1

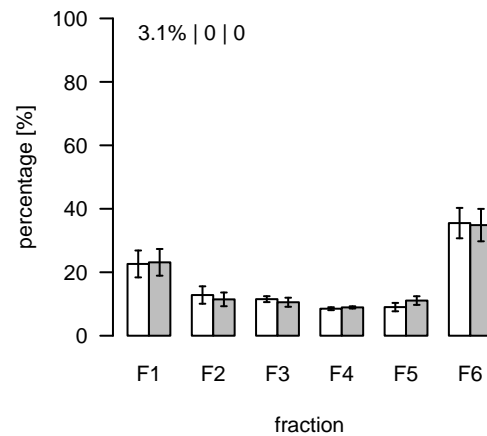



**S301 (m/z=437.75839; rt=9.43329)**  
T/S Cluster: S-9.4-2

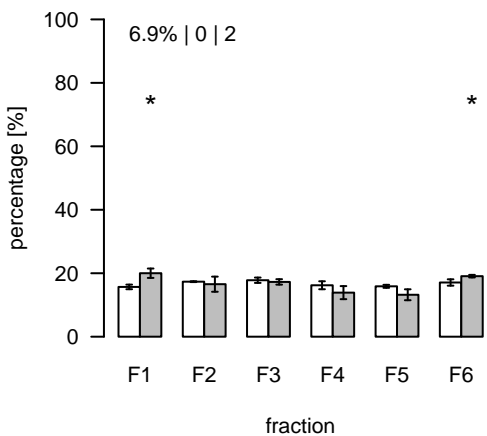

**S302 (m/z=437.786149; rt=9.49381)**  
T/S Cluster: S-9.5-1

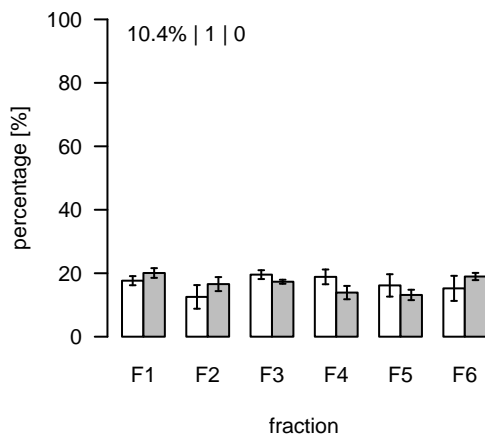

**S304 (m/z=570.305658; rt=9.5678)**  
T/S Cluster: S-9.6-1

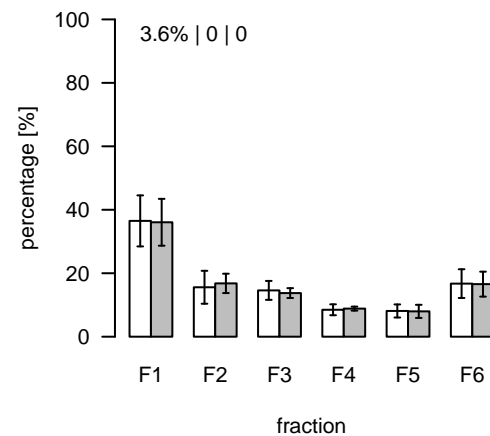

**S303 (m/z=570.32544; rt=9.56741)**  
T/S Cluster: S-9.6-1

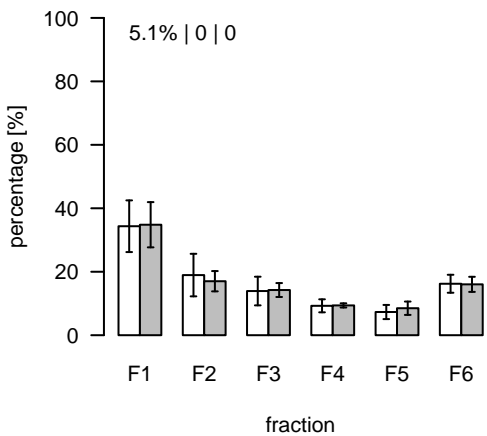

**S305 (m/z=640.320822; rt=9.5758)**  
T/S Cluster: S-9.6-2

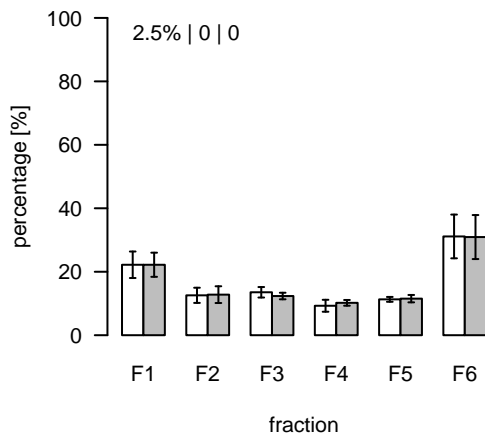

**S306 (m/z=824.374478; rt=9.64238)**  
T/S Cluster: S-9.6-3

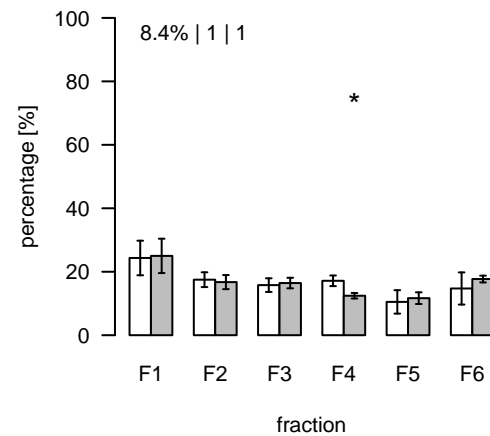

**S307 (m/z=652.311959; rt=9.6779)**  
T/S Cluster: S-9.7-1

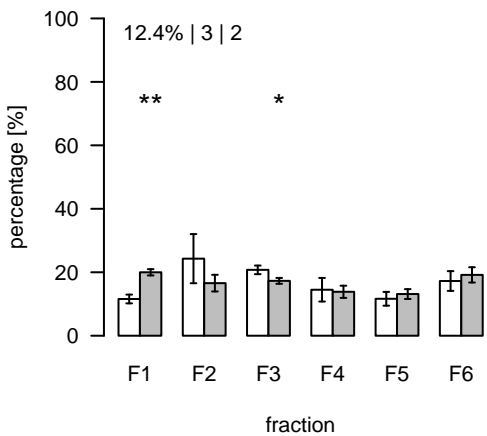

**S308 (m/z=824.364373; rt=9.72525)**  
T/S Cluster: S-9.7-2

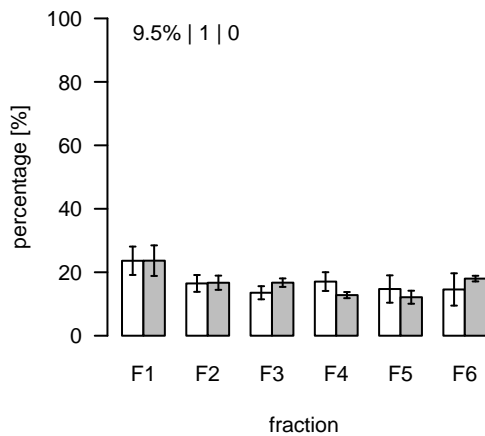

**S311 (m/z=654.327737; rt=9.80671)**  
T/S Cluster: S-9.8-1

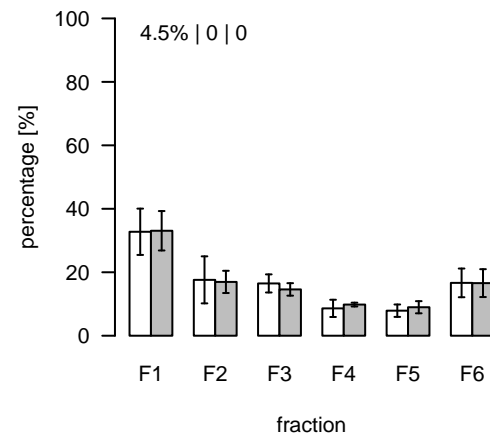

**S309 (m/z=612.317534; rt=9.78218)**  
T/S Cluster: S-9.8-1

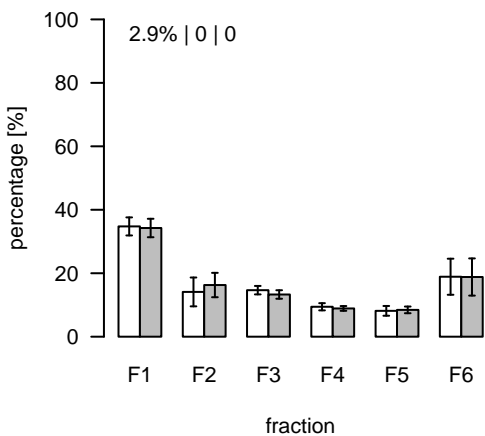

**S312 (m/z=655.331583; rt=9.807)**  
T/S Cluster: S-9.8-1

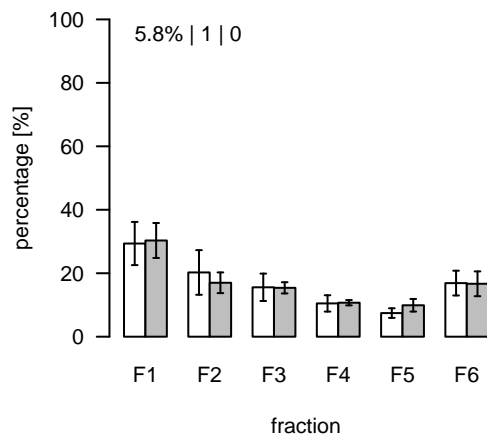

**S310 (m/z=437.730124; rt=9.7917)**  
T/S Cluster: S-9.8-2

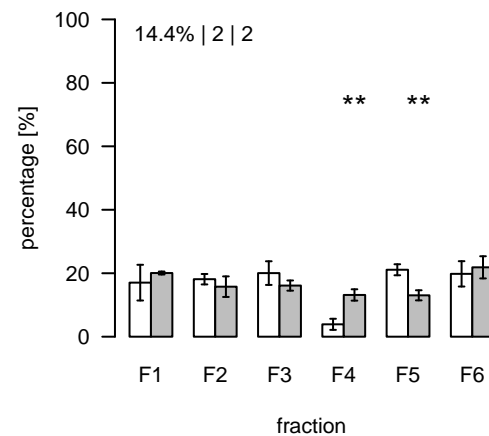

**S313 (m/z=556.253473; rt=9.9775)**  
T/S Cluster: S-10-1

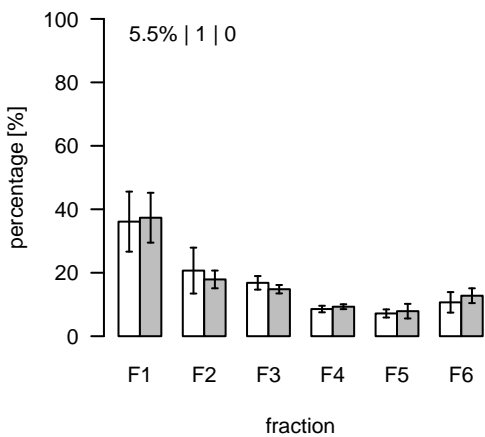

**S315 (m/z=774.377968; rt=9.99449)**  
T/S Cluster: S-10-2

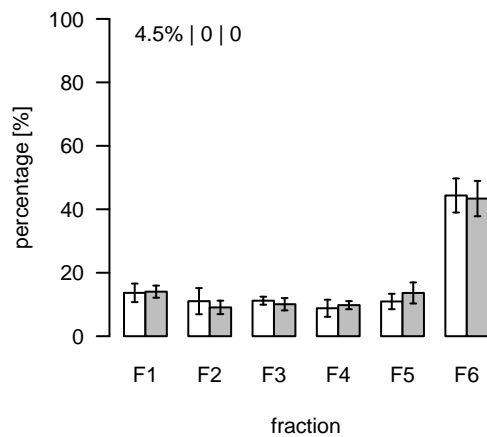

**S314 (m/z=775.381896; rt=9.99427)**  
T/S Cluster: S-10-2

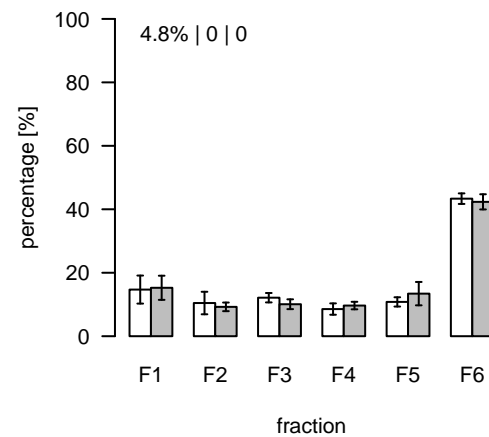

**S324 (m/z=598.301129; rt=10.06174)**  
T/S Cluster: S-10.1-1

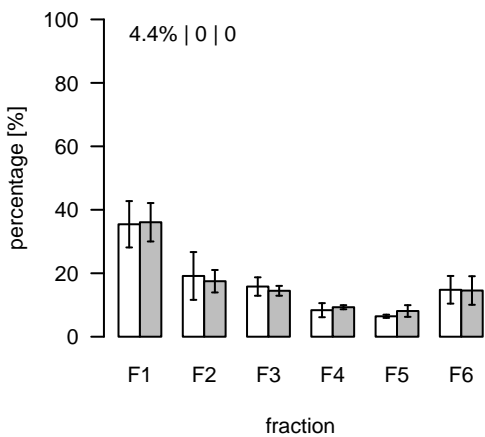

**S321 (m/z=599.304496; rt=10.06127)**  
T/S Cluster: S-10.1-1

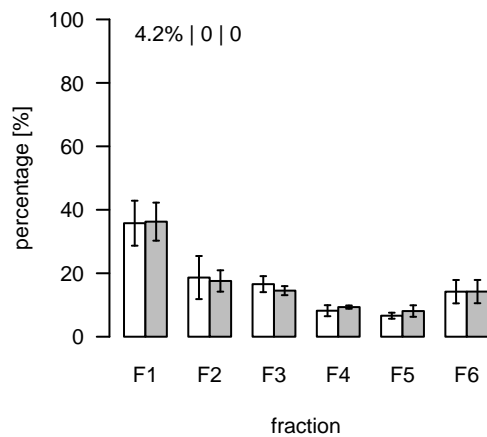

**S322 (m/z=299.150847; rt=10.06144)**  
T/S Cluster: S-10.1-1

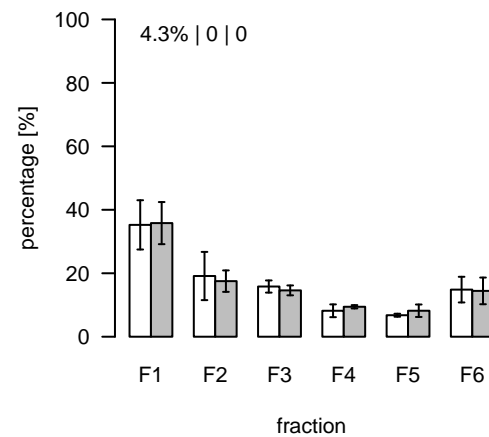

**S320 (m/z=598.267845; rt=10.06126)**  
T/S Cluster: S-10.1-1

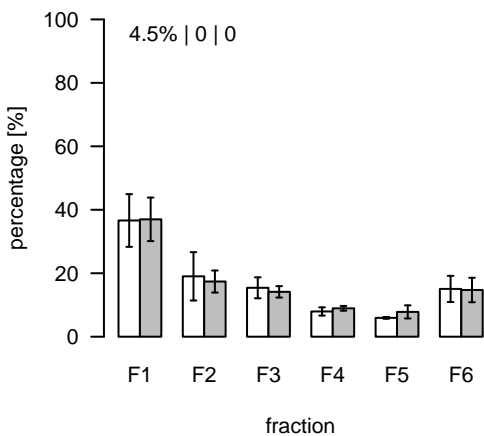

**S327 (m/z=654.327051; rt=10.14652)**  
T/S Cluster: S-10.1-1

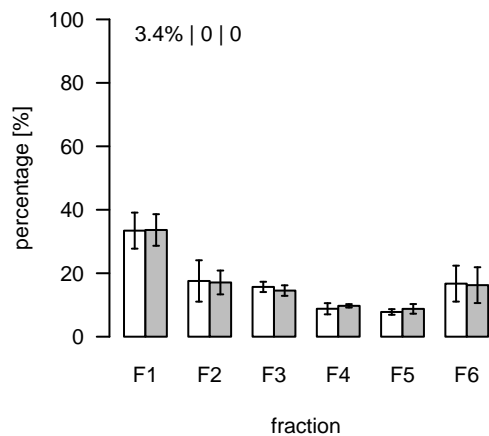

**S317 (m/z=599.277461; rt=10.06024)**  
T/S Cluster: S-10.1-1

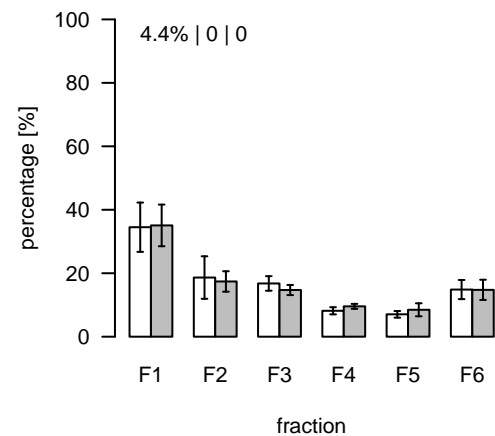

**S318 (m/z=600.306713; rt=10.06071)**  
T/S Cluster: S-10.1-1

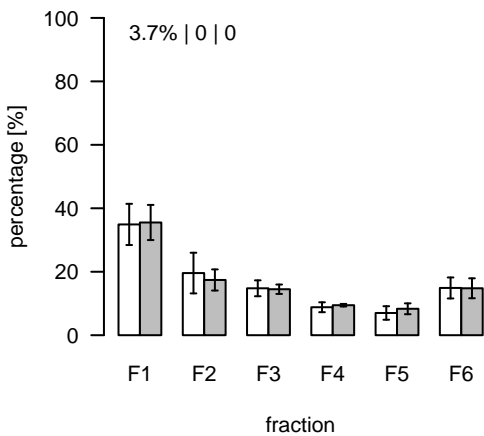

**S316 (m/z=600.29045; rt=10.05942)**  
T/S Cluster: S-10.1-1

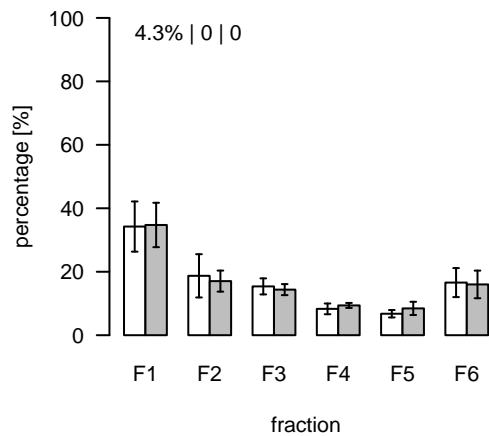

**S323 (m/z=199.436003; rt=10.0615)**  
T/S Cluster: S-10.1-1

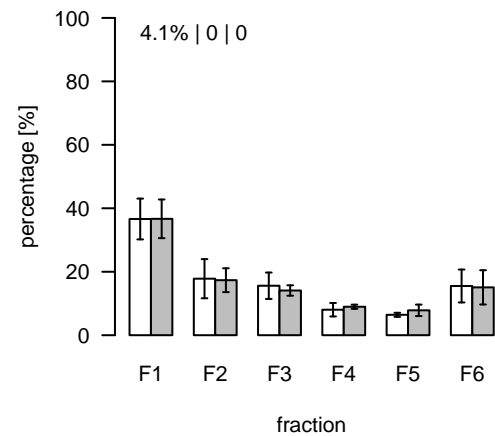

**S328 (m/z=655.330428; rt=10.14866)**  
T/S Cluster: S-10.1-1

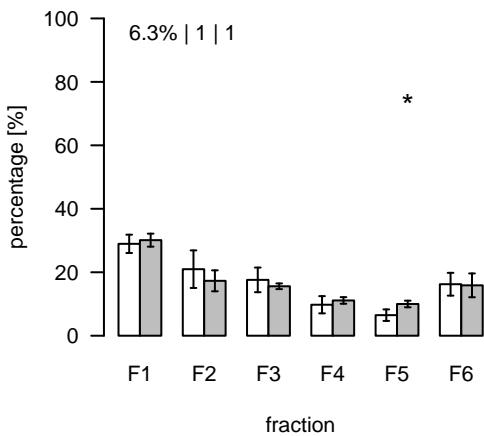

**S319 (m/z=620.283276; rt=10.06091)**  
T/S Cluster: S-10.1-1

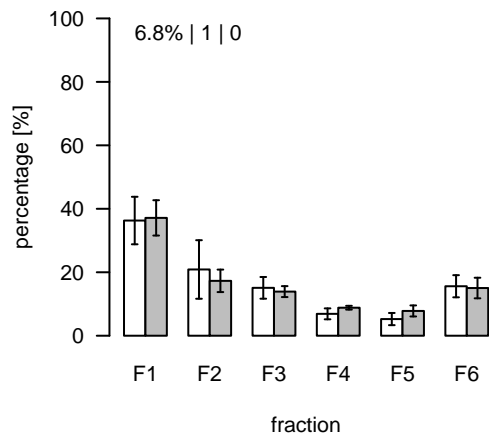

**S325 (m/z=184.073387; rt=10.06364)**  
T/S Cluster: S-10.1-1

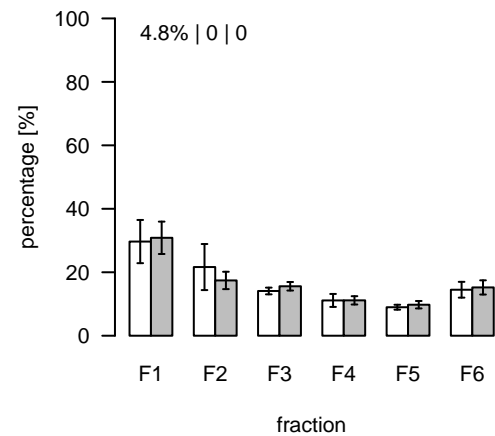

**S326 (m/z=830.403788; rt=10.09175)**  
T/S Cluster: S-10.1-2

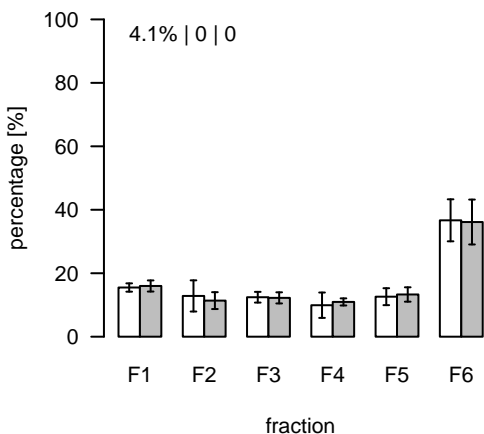

**S329 (m/z=437.739068; rt=10.2922)**  
T/S Cluster: S-10.3-1

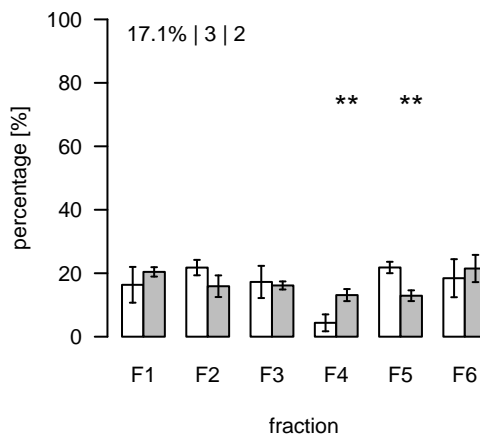

**S330 (m/z=654.327791; rt=10.38938)**  
T/S Cluster: S-10.4-1

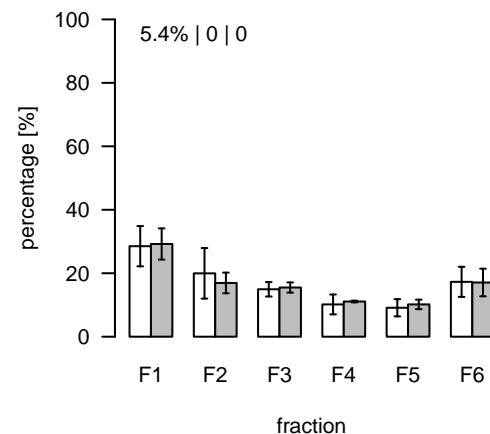

**S331 (m/z=437.782955; rt=10.49386)**  
T/S Cluster: S-10.5-1

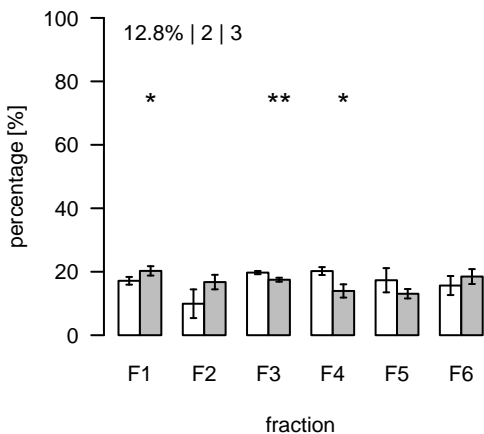

**S332 (m/z=437.748989; rt=10.60236)**  
T/S Cluster: S-10.6-1

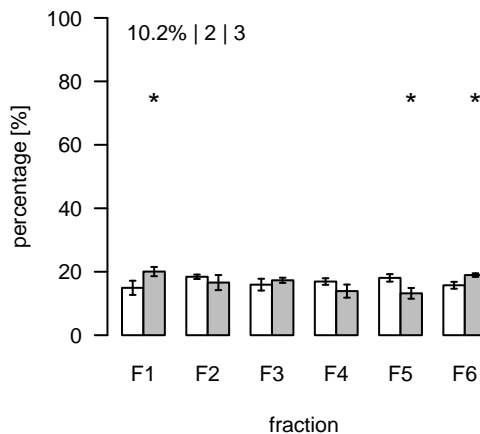

**S333 (m/z=722.396898; rt=10.72894)**  
T/S Cluster: S-10.7-1

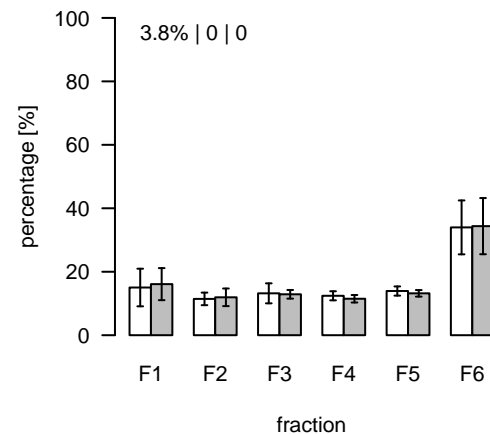

**S334 (m/z=596.329992; rt=10.75164)**  
T/S Cluster: S-10.8-1

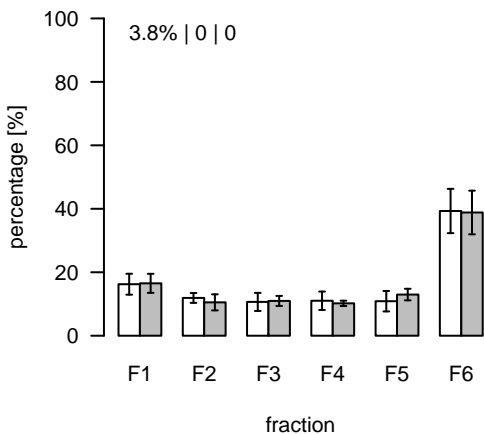

**S335 (m/z=722.396797; rt=10.77744)**  
T/S Cluster: S-10.8-2

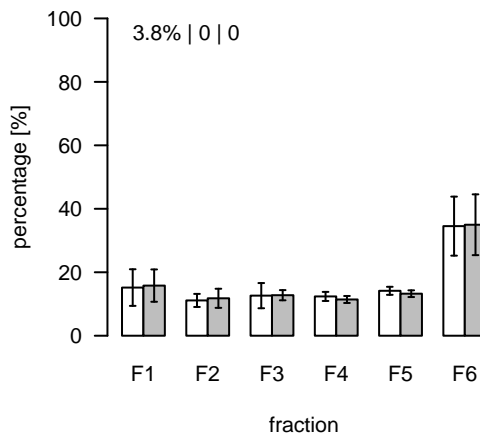

**S336 (m/z=437.800693; rt=10.78113)**  
T/S Cluster: S-10.8-3

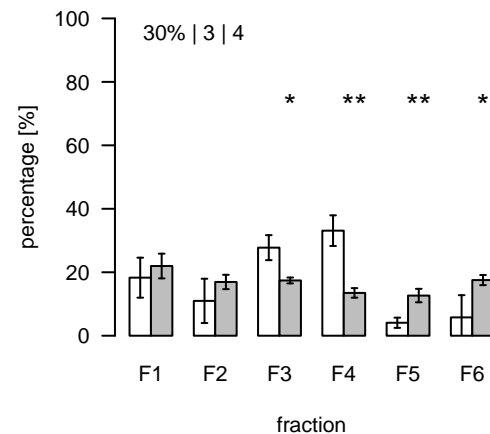

**S338 (m/z=612.324895; rt=10.81816)**  
T/S Cluster: S-10.8-4

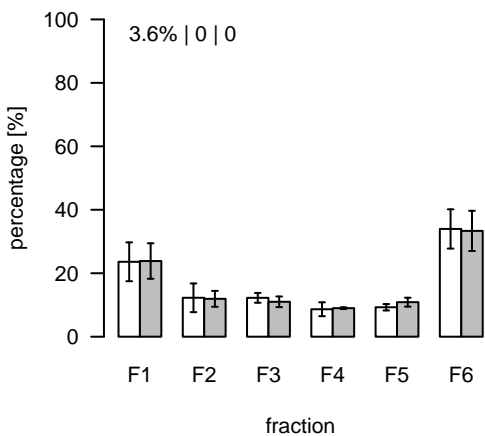

**S339 (m/z=612.32494; rt=10.8184)**  
T/S Cluster: S-10.8-4

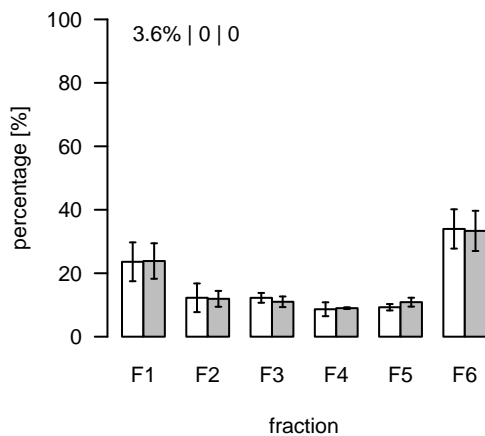

**S337 (m/z=612.303079; rt=10.81189)**  
T/S Cluster: S-10.8-4

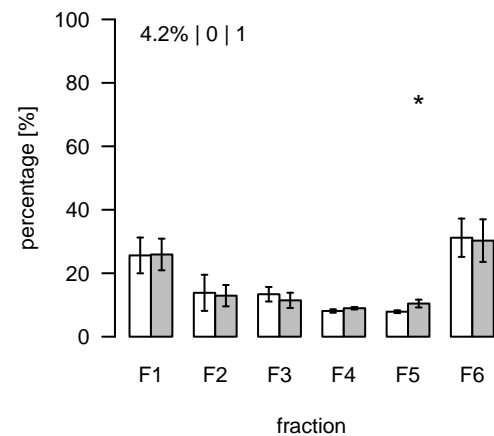

**S340 (m/z=758.384556; rt=10.82667)**  
T/S Cluster: S-10.8-5

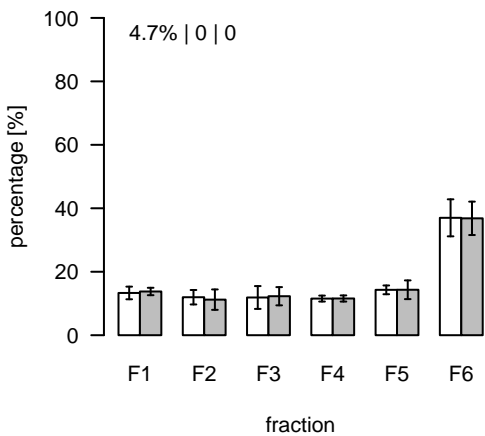

**S342 (m/z=582.306005; rt=10.85642)**  
T/S Cluster: S-10.9-1

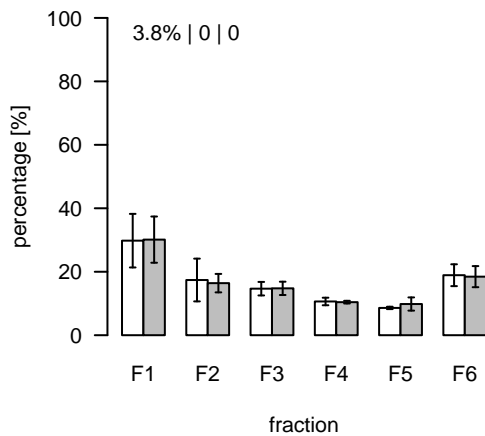

**S341 (m/z=582.285811; rt=10.85165)**  
T/S Cluster: S-10.9-1

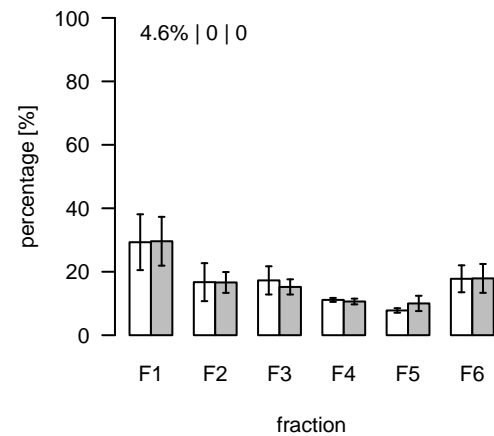

**S343 (m/z=437.750499; rt=10.8718)**  
T/S Cluster: S-10.9-2

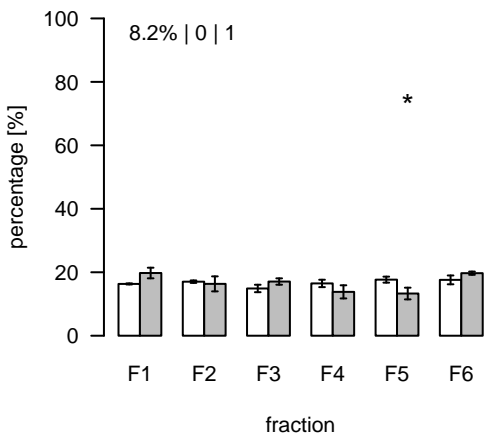

**S344 (m/z=582.305608; rt=10.91689)**  
T/S Cluster: S-10.9-3

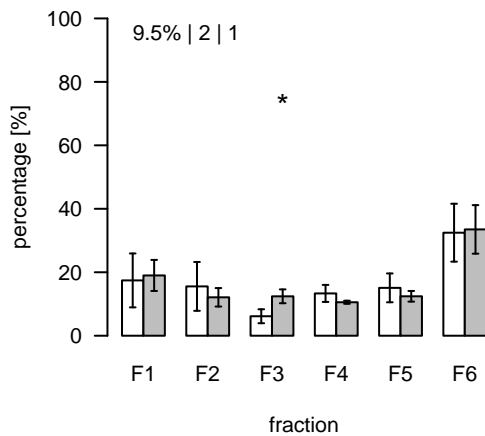

**S345 (m/z=636.317111; rt=11.12621)**  
T/S Cluster: S-11.1-1

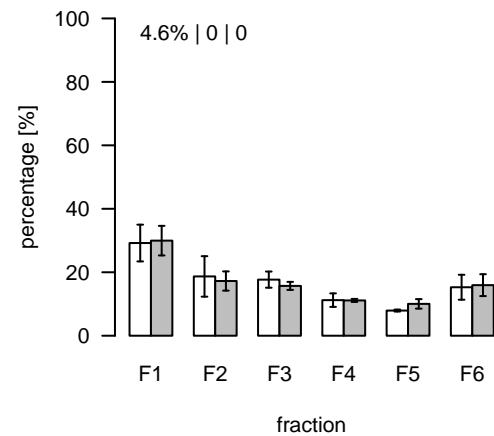

**S346 (m/z=736.407149; rt=11.17579)**  
T/S Cluster: S-11.2-1

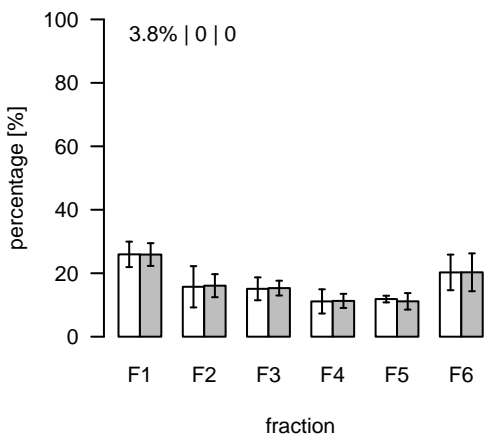

**S347 (m/z=912.483981; rt=11.18574)**  
T/S Cluster: S-11.2-2

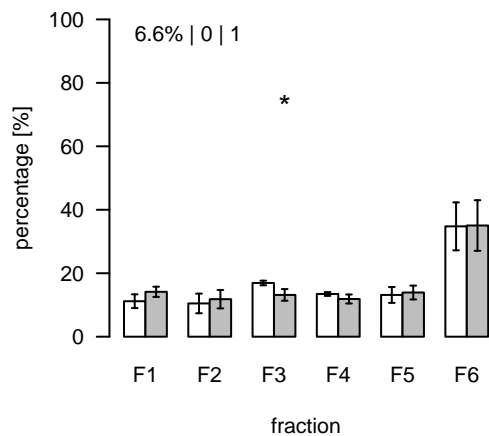

**S348 (m/z=823.627922; rt=11.30914)**  
T/S Cluster: S-11.3-1

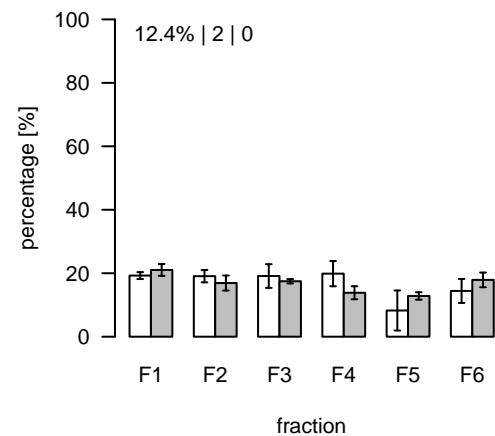

**S349 (m/z=608.322013; rt=11.32434)**  
T/S Cluster: S-11.3-2

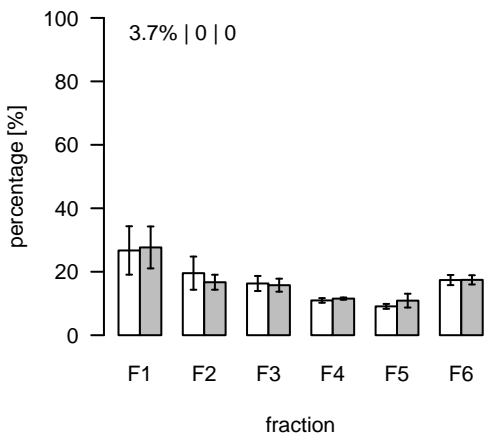

**S350 (m/z=610.337383; rt=11.38176)**  
T/S Cluster: S-11.4-1

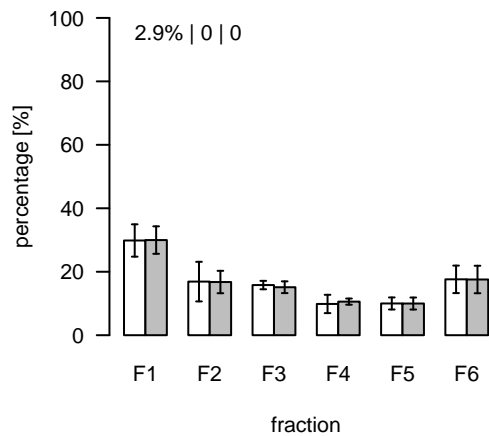

**S351 (m/z=437.739811; rt=11.38715)**  
T/S Cluster: S-11.4-2

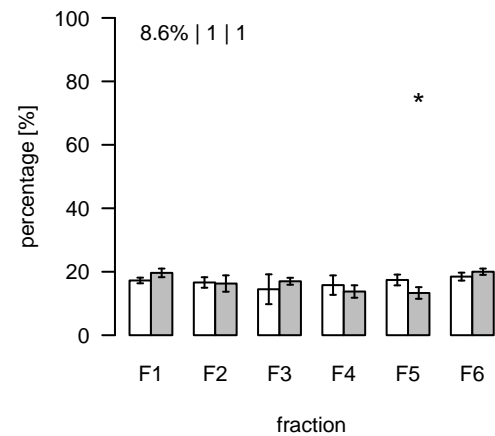

**S352 (m/z=724.414262; rt=11.39915)**  
T/S Cluster: S-11.4-3

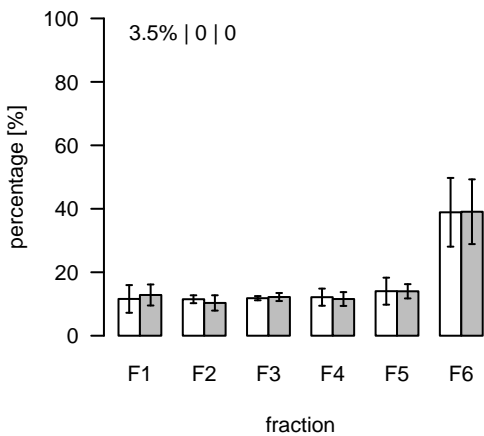

**S353 (m/z=437.770462; rt=11.54149)**  
T/S Cluster: S-11.5-1

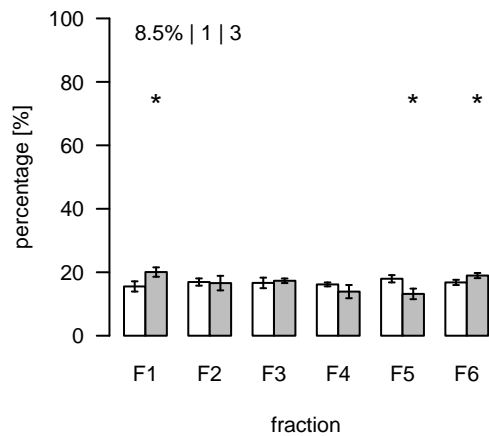

**S354 (m/z=335.14305; rt=11.73107)**  
T/S Cluster: S-11.7-1

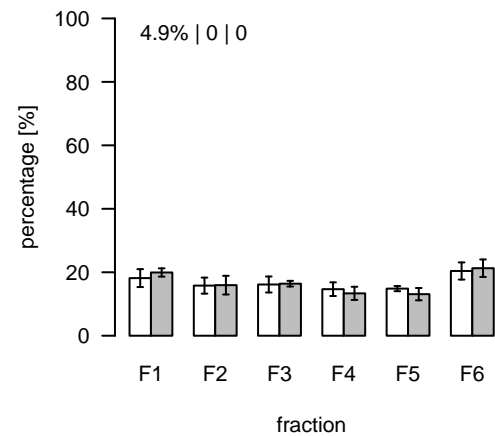

**S355 (m/z=471.327283; rt=11.78374)**  
T/S Cluster: S-11.8-1

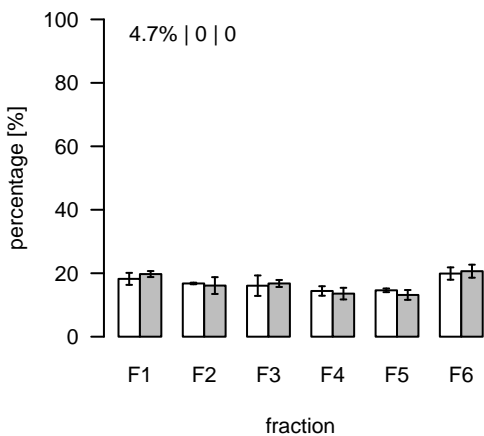

**S356 (m/z=470.323666; rt=11.78388)**  
T/S Cluster: S-11.8-2

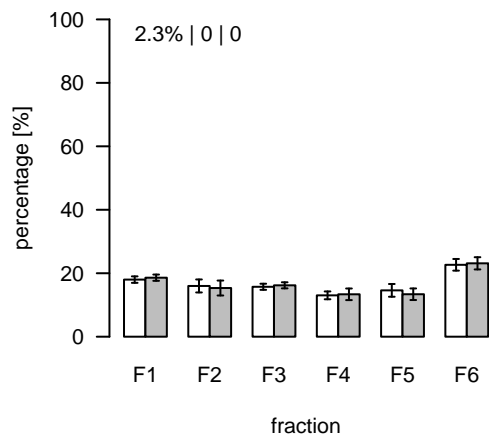

**S357 (m/z=437.726429; rt=11.91956)**  
T/S Cluster: S-11.9-1

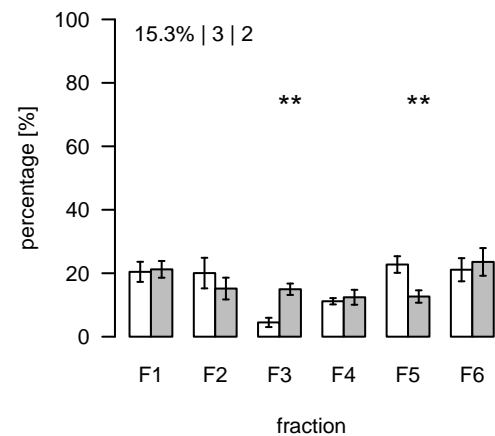

**S358 (m/z=437.763916; rt=11.96765)**  
T/S Cluster: S-12-1

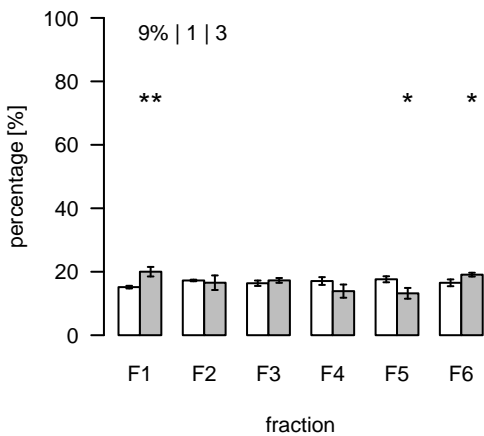

**S359 (m/z=362.190468; rt=12.00622)**  
T/S Cluster: S-12-2

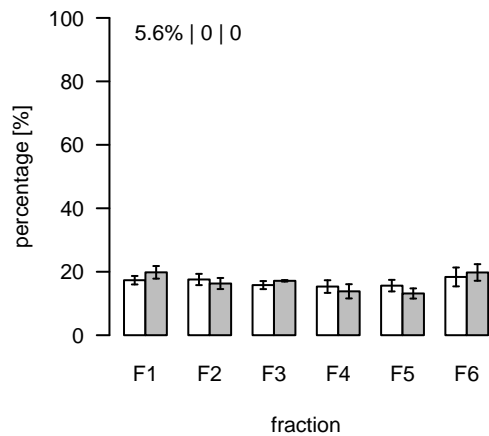

**S360 (m/z=698.390352; rt=12.05074)**  
T/S Cluster: S-12.1-1

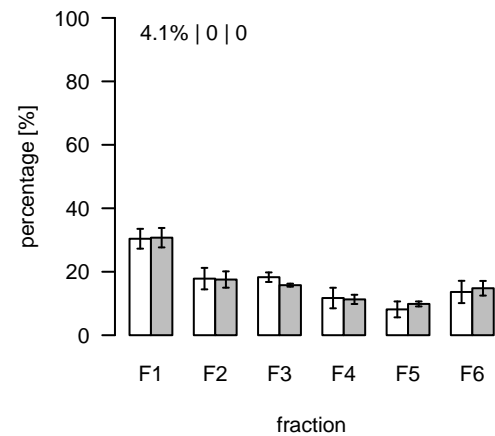

**S361 (m/z=698.389792; rt=12.05085)**  
T/S Cluster: S-12.1-1

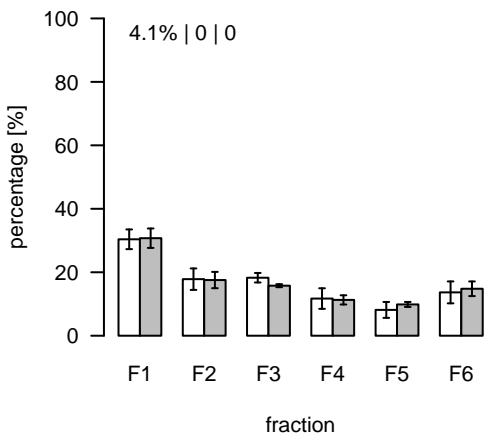

**S362 (m/z=740.437794; rt=12.06035)**  
T/S Cluster: S-12.1-2

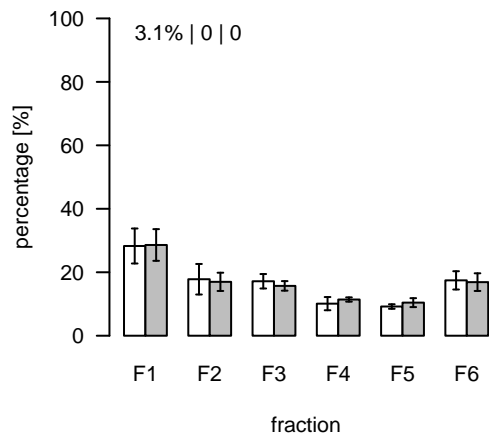

**S364 (m/z=741.441077; rt=12.06072)**  
T/S Cluster: S-12.1-2

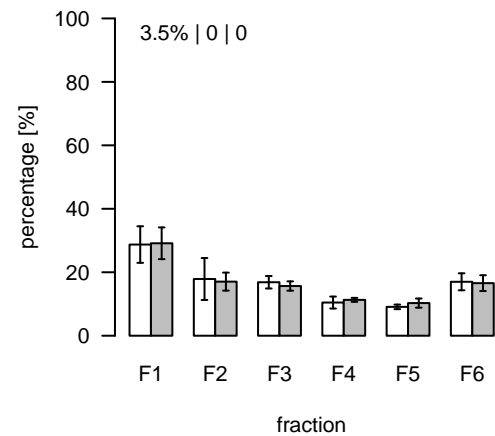

**S366 (m/z=742.444127; rt=12.06175)**  
T/S Cluster: S-12.1-2

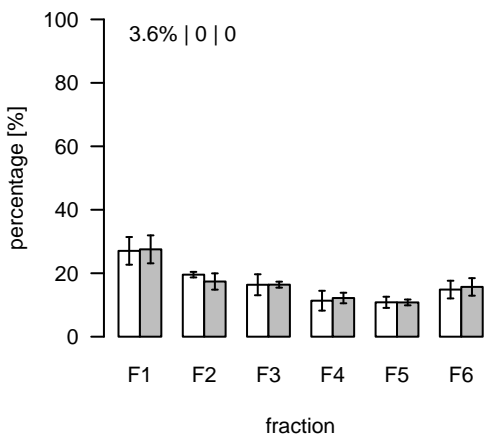

**S363 (m/z=370.217774; rt=12.06035)**  
T/S Cluster: S-12.1-2

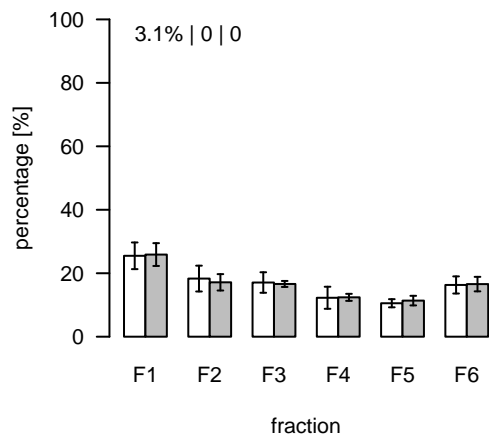

**S365 (m/z=370.223036; rt=12.06105)**  
T/S Cluster: S-12.1-2

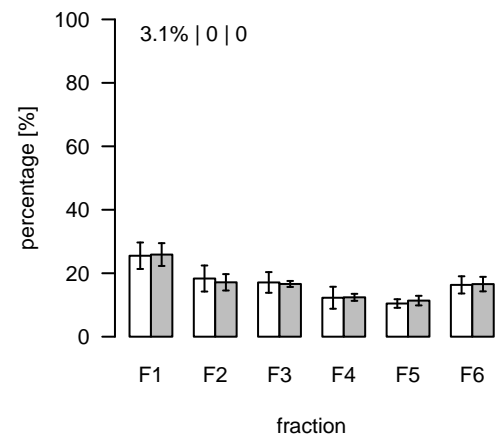

**S369 (m/z=772.384168; rt=12.12229)**  
T/S Cluster: S-12.1-2

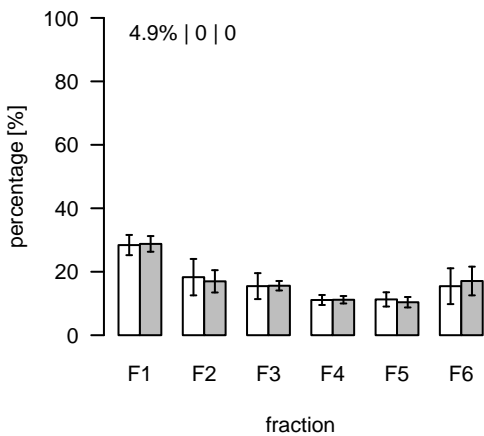

**S367 (m/z=770.418686; rt=12.08398)**  
T/S Cluster: S-12.1-3

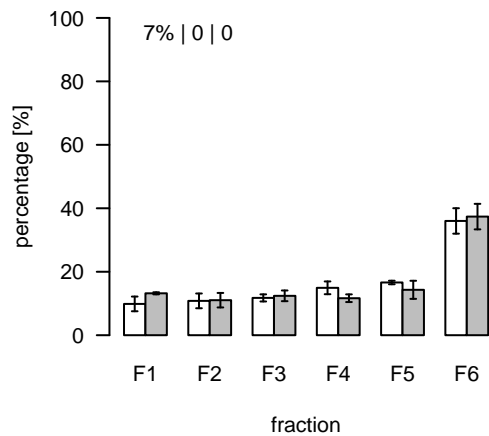

**S368 (m/z=708.418704; rt=12.08746)**  
T/S Cluster: S-12.1-4

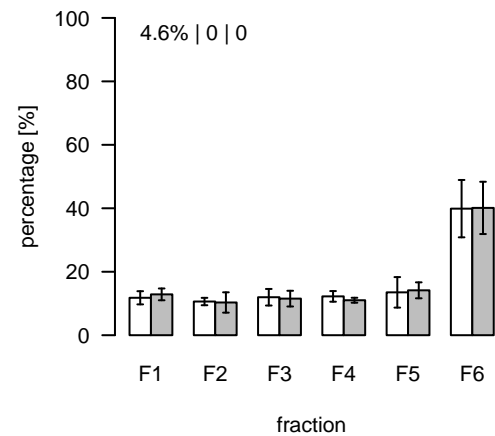

**S370 (m/z=722.414594; rt=12.12819)**  
T/S Cluster: S-12.1-5

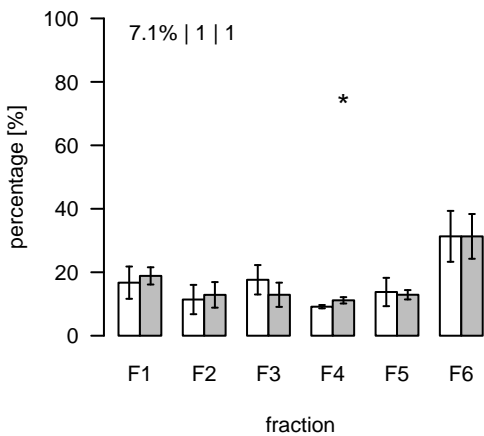

**S371 (m/z=752.443916; rt=12.15204)**  
T/S Cluster: S-12.2-1

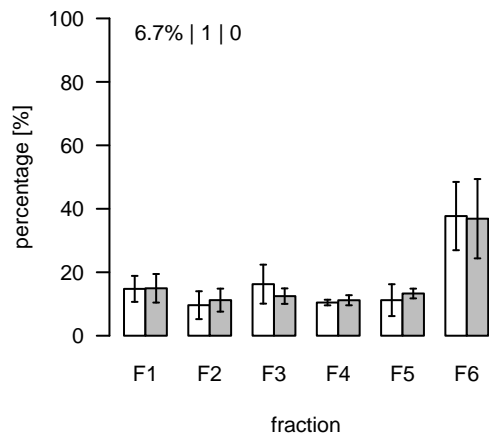

**S372 (m/z=722.398853; rt=12.16149)**  
T/S Cluster: S-12.2-2

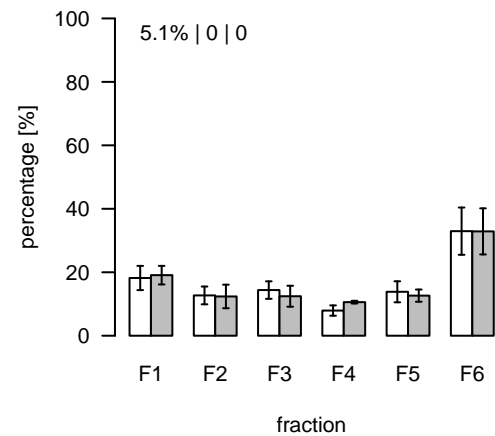



**S373 (m/z=249.106007; rt=12.16161)**  
T/S Cluster: S-12.2-3

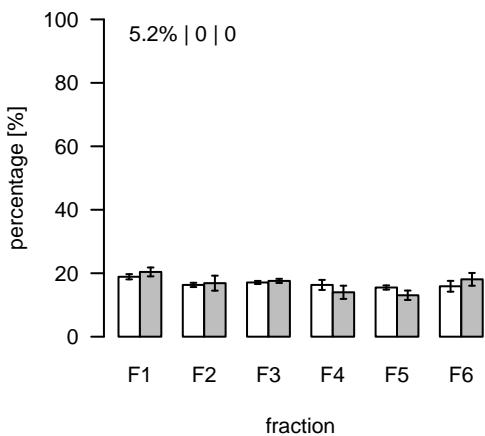

**S374 (m/z=249.103192; rt=12.16165)**  
T/S Cluster: S-12.2-4

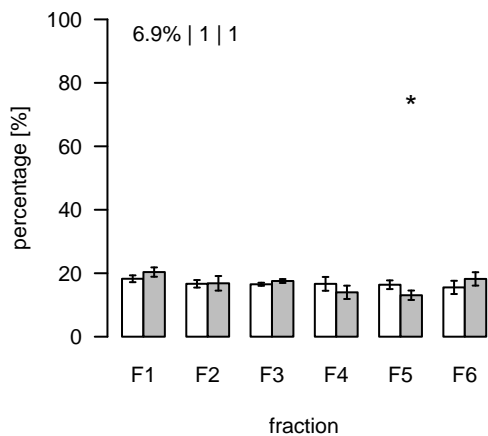

**S375 (m/z=710.426472; rt=12.17141)**  
T/S Cluster: S-12.2-5

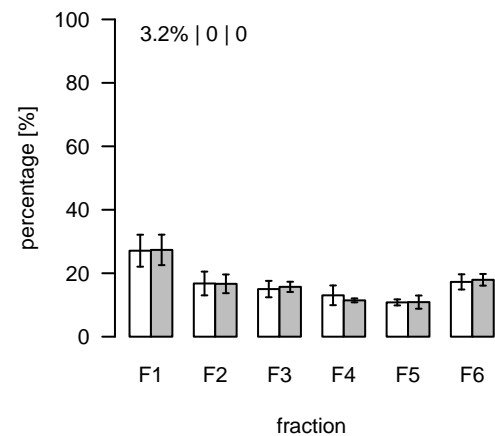

**S376 (m/z=898.511282; rt=12.18795)**  
T/S Cluster: S-12.2-6

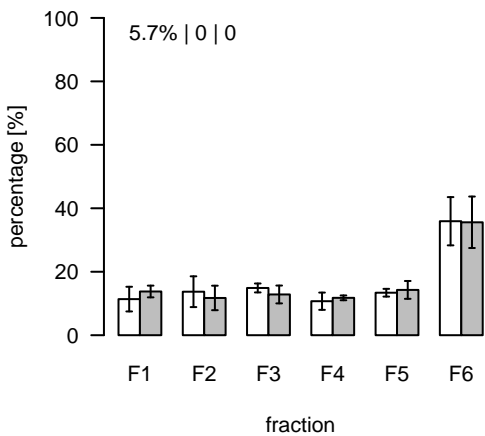

**S377 (m/z=722.430685; rt=12.19378)**  
T/S Cluster: S-12.2-7

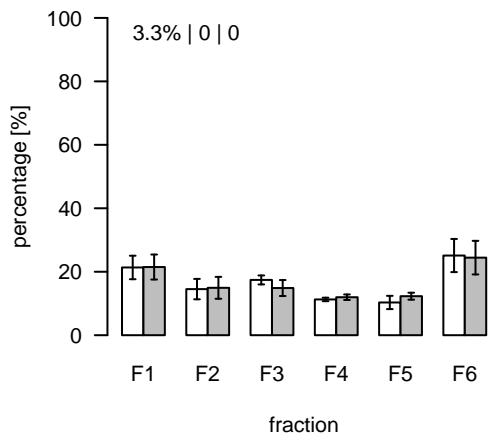

**S378 (m/z=437.725748; rt=12.21421)**  
T/S Cluster: S-12.2-8

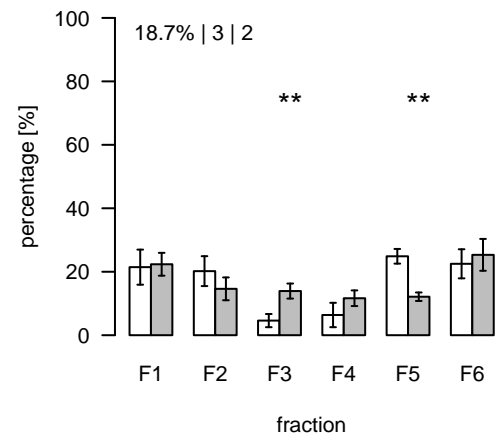

**S379 (m/z=752.446382; rt=12.22445)**  
T/S Cluster: S-12.2-9

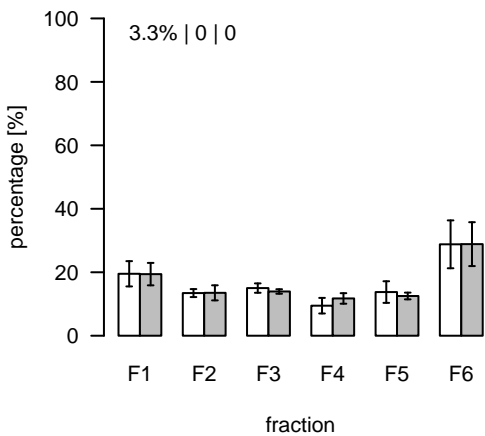

**S380 (m/z=634.34721; rt=12.23912)**  
T/S Cluster: S-12.2-10

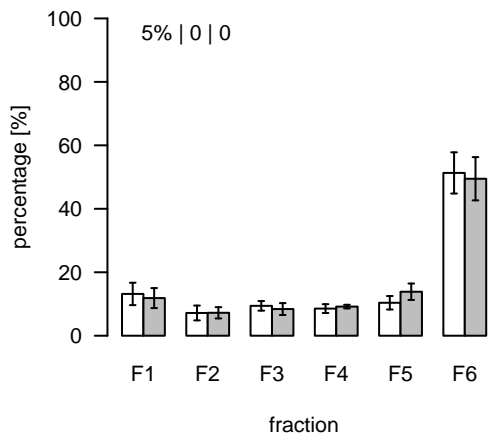

**S381 (m/z=912.484429; rt=12.24036)**  
T/S Cluster: S-12.2-11

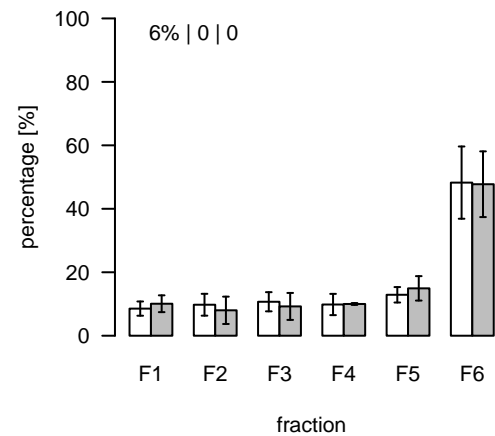

**S382 (m/z=639.301512; rt=12.24167)**  
T/S Cluster: S-12.2-12

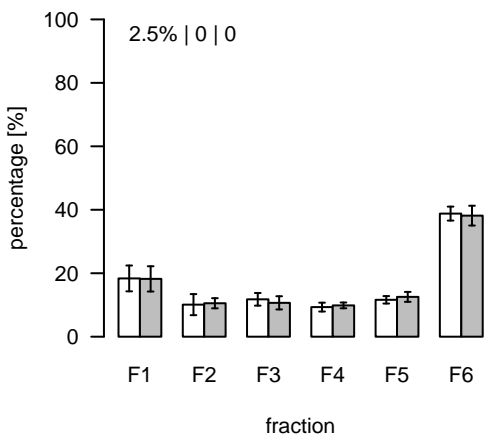

**S383 (m/z=635.349453; rt=12.24472)**  
T/S Cluster: S-12.2-12

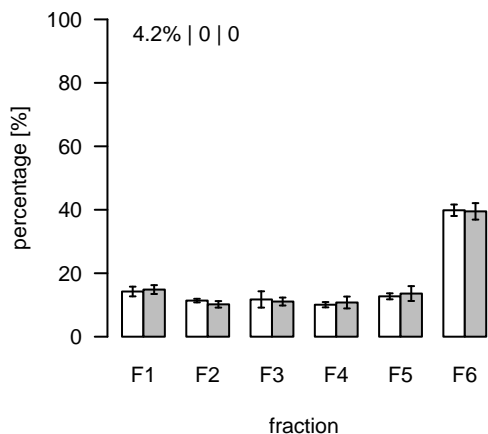

**S384 (m/z=331.148217; rt=12.25789)**  
T/S Cluster: S-12.3-1

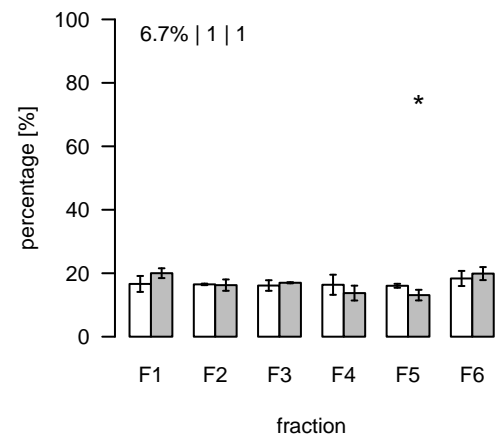

**S385 (m/z=756.358091; rt=12.27418)**  
T/S Cluster: S-12.3-2

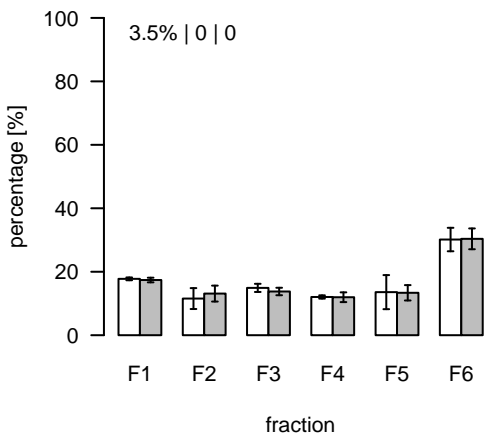

**S387 (m/z=756.363331; rt=12.29686)**  
T/S Cluster: S-12.3-2

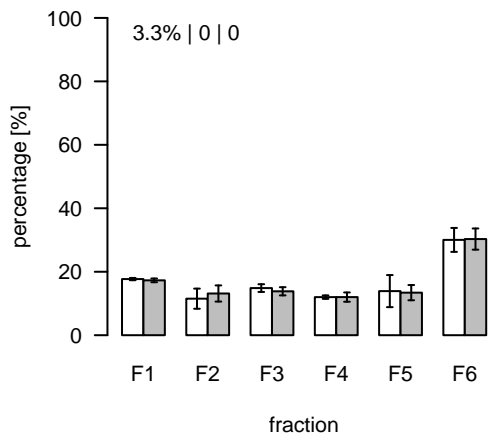

**S386 (m/z=704.38868; rt=12.28762)**  
T/S Cluster: S-12.3-3

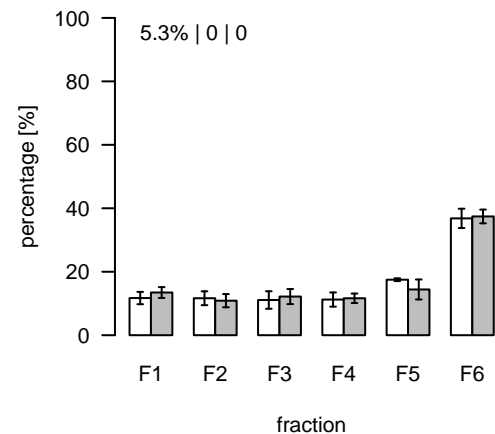

**S388 (m/z=1066.582614; rt=12.31926)**  
T/S Cluster: S-12.3-4

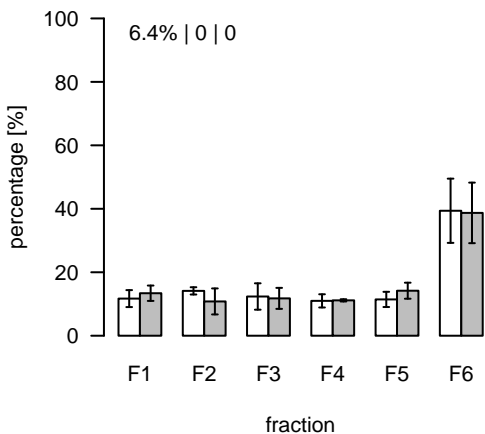

**S389 (m/z=894.489496; rt=12.32224)**  
T/S Cluster: S-12.3-5

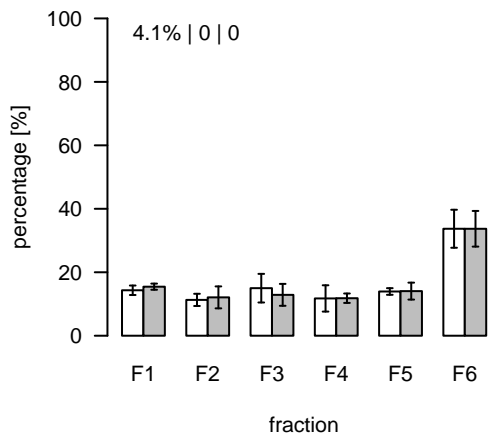

**S391 (m/z=738.421816; rt=12.32507)**  
T/S Cluster: S-12.3-6

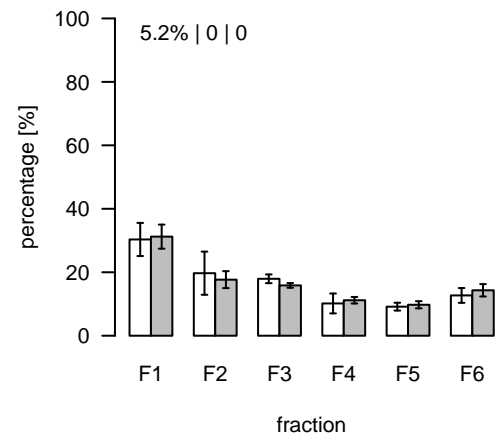

**S390 (m/z=739.425191; rt=12.32483)**  
T/S Cluster: S-12.3-6

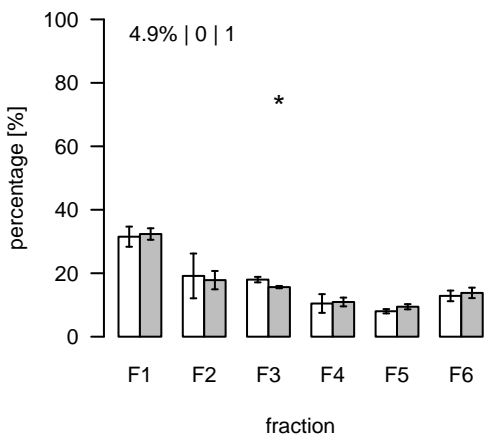

**S392 (m/z=734.439907; rt=12.3301)**  
T/S Cluster: S-12.3-7

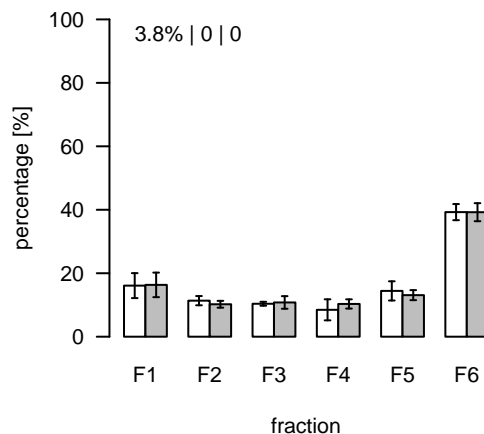

**S393 (m/z=770.364877; rt=12.34045)**  
T/S Cluster: S-12.3-8

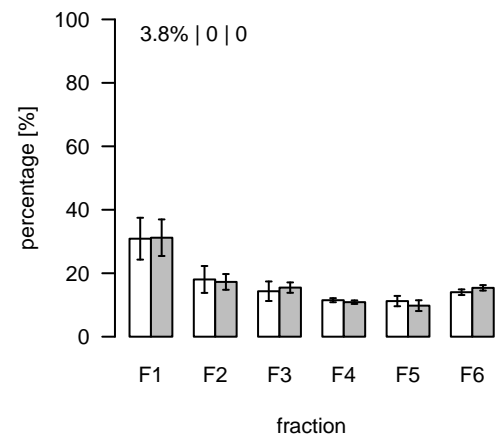

**S394 (m/z=718.395347; rt=12.35006)**  
T/S Cluster: S-12.4-1

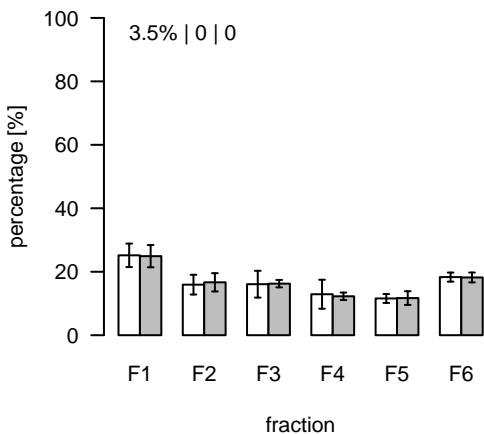

**S395 (m/z=724.44235; rt=12.36232)**  
T/S Cluster: S-12.4-2

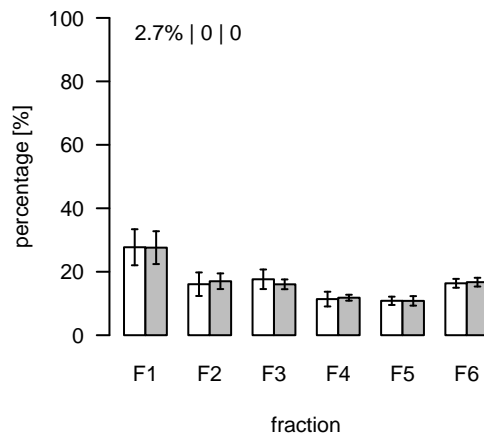

**S396 (m/z=725.446012; rt=12.36346)**  
T/S Cluster: S-12.4-2

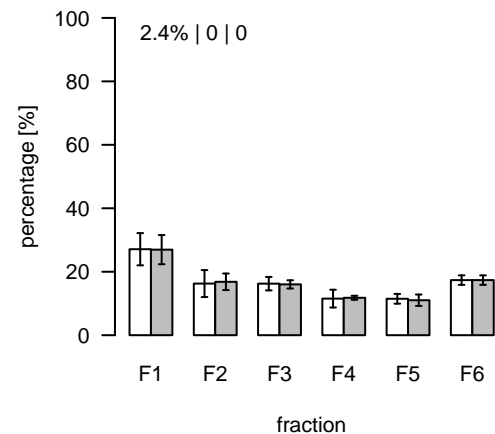

**S405 (m/z=648.353164; rt=12.42489)**  
T/S Cluster: S-12.4-2

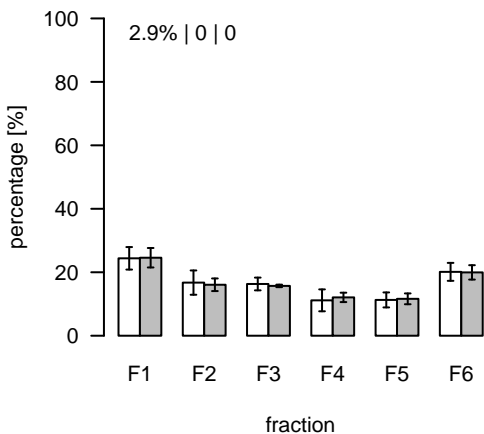

**S397 (m/z=876.511145; rt=12.36851)**  
T/S Cluster: S-12.4-3

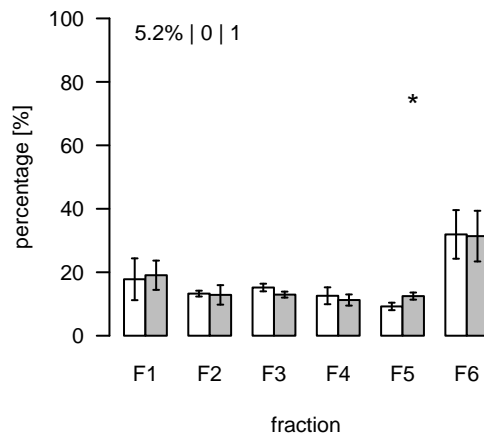

**S398 (m/z=910.468927; rt=12.36861)**  
T/S Cluster: S-12.4-4

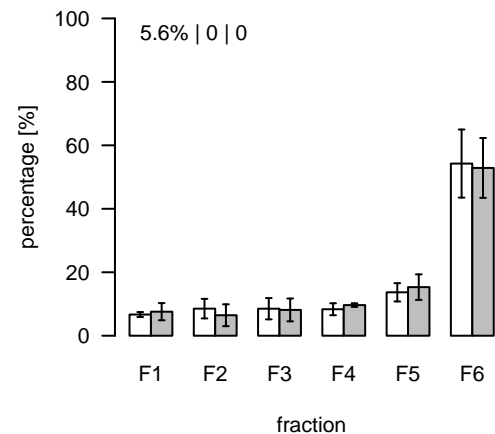

**S399** (m/z=911.470344; rt=12.3748)  
T/S Cluster: S-12.4-5

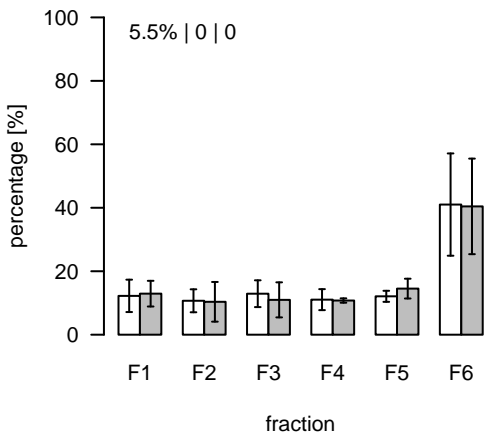

**S400** (m/z=734.393512; rt=12.39435)  
T/S Cluster: S-12.4-6

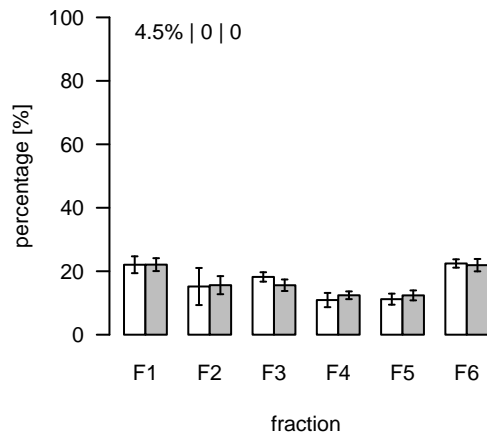

**S401** (m/z=824.427303; rt=12.39453)  
T/S Cluster: S-12.4-7

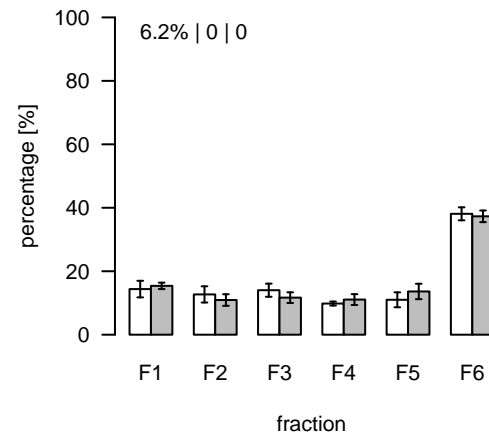

**S402** (m/z=720.376049; rt=12.39818)  
T/S Cluster: S-12.4-8

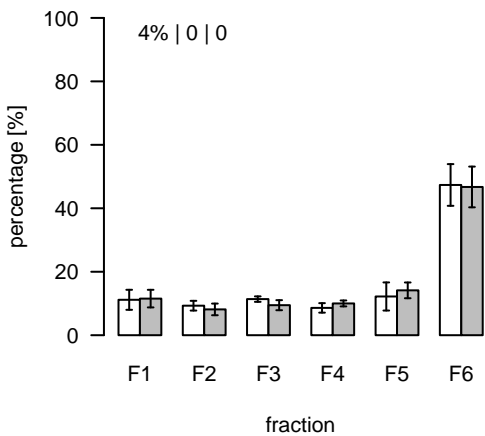

**S403** (m/z=860.505373; rt=12.41938)  
T/S Cluster: S-12.4-9

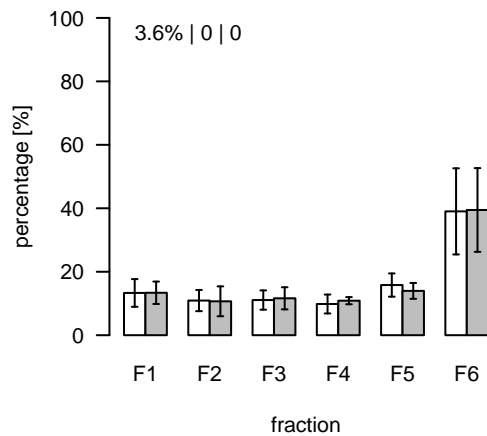

**S404** (m/z=331.148195; rt=12.42199)  
T/S Cluster: S-12.4-10

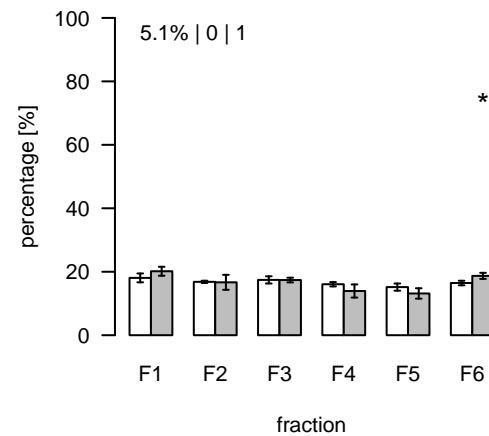

**S406** (m/z=634.347317; rt=12.45653)  
T/S Cluster: S-12.5-1

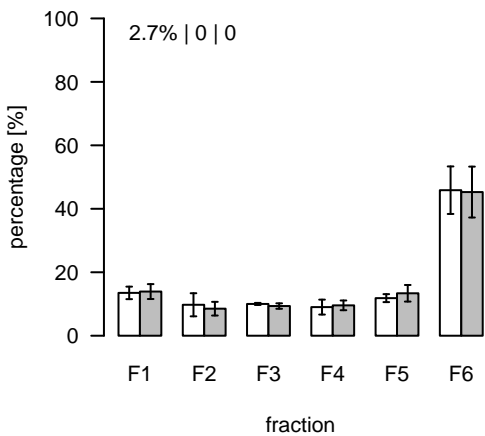

**S407** (m/z=554.31097; rt=12.47075)  
T/S Cluster: S-12.5-2

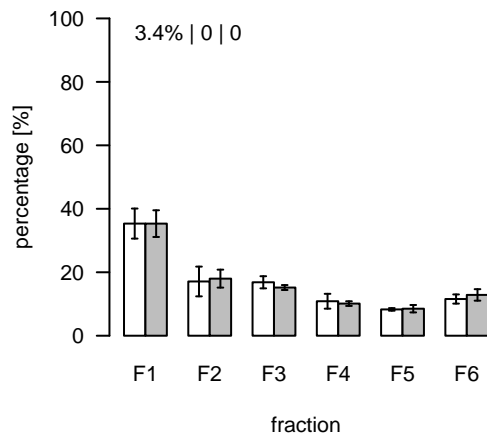

**S411** (m/z=554.31037; rt=12.52128)  
T/S Cluster: S-12.5-2

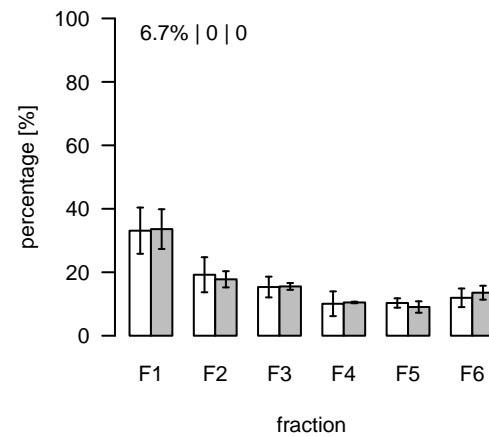

**S413 (m/z=706.40106; rt=12.52381)**  
T/S Cluster: S-12.5-3

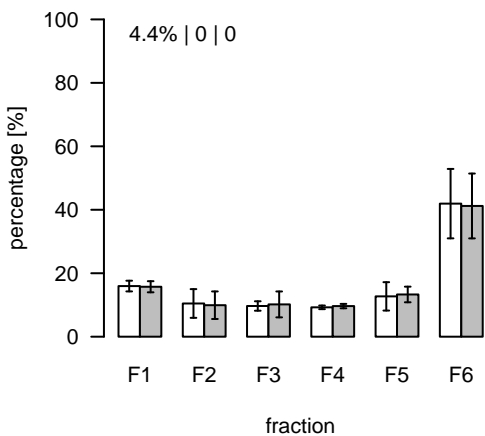

**S422 (m/z=706.401172; rt=12.54999)**  
T/S Cluster: S-12.5-3

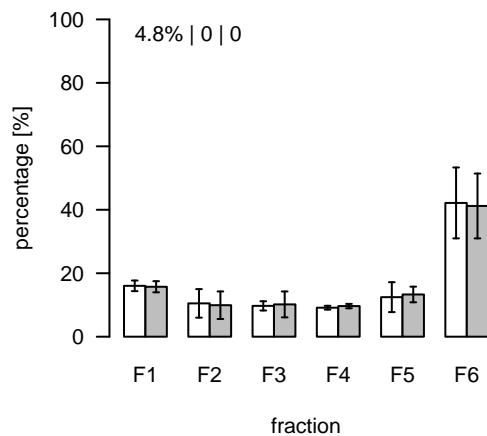

**S408 (m/z=897.49407; rt=12.4961)**  
T/S Cluster: S-12.5-3

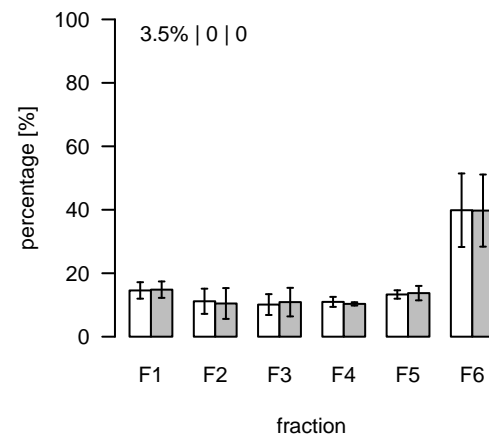

**S409 (m/z=711.358373; rt=12.49785)**  
T/S Cluster: S-12.5-4

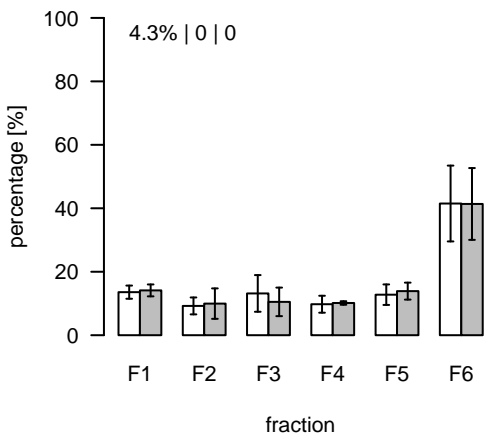

**S410 (m/z=896.488146; rt=12.51678)**  
T/S Cluster: S-12.5-5

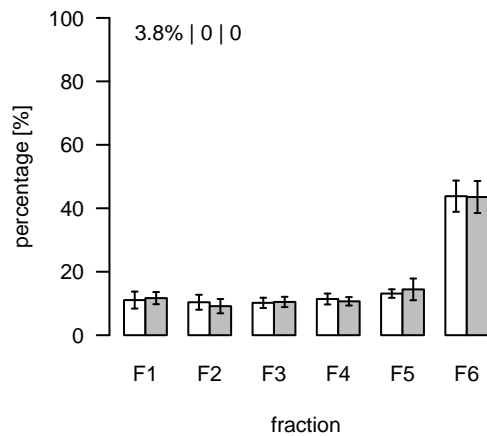

**S415 (m/z=896.486887; rt=12.53737)**  
T/S Cluster: S-12.5-5

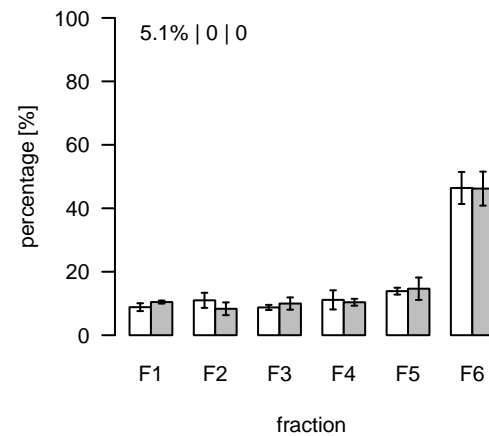

**S412 (m/z=1048.573305; rt=12.5224)**  
T/S Cluster: S-12.5-6

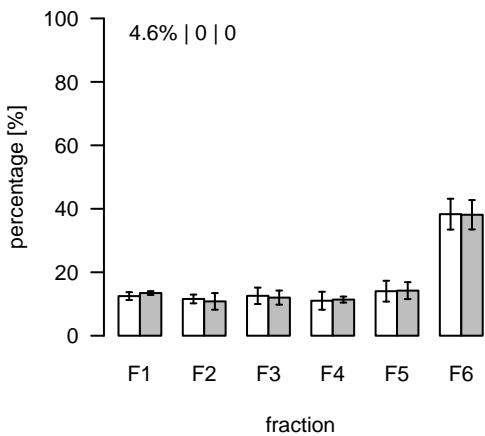

**S414 (m/z=897.49321; rt=12.53038)**  
T/S Cluster: S-12.5-7

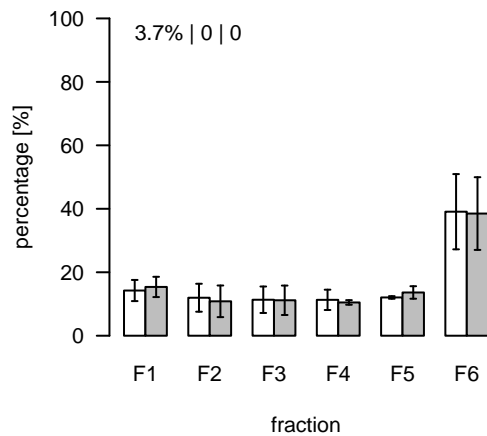

**S416 (m/z=702.37831; rt=12.5375)**  
T/S Cluster: S-12.5-8

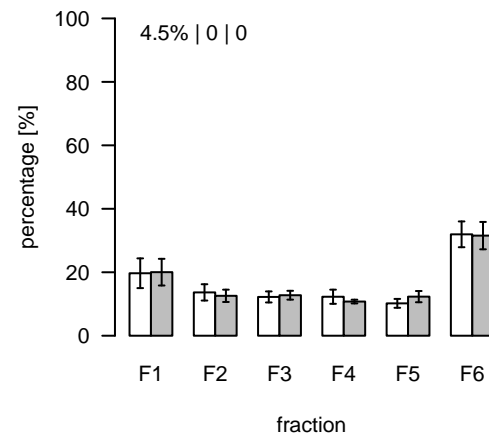

**S417 (m/z=720.401855; rt=12.53936)**  
T/S Cluster: S-12.5-9

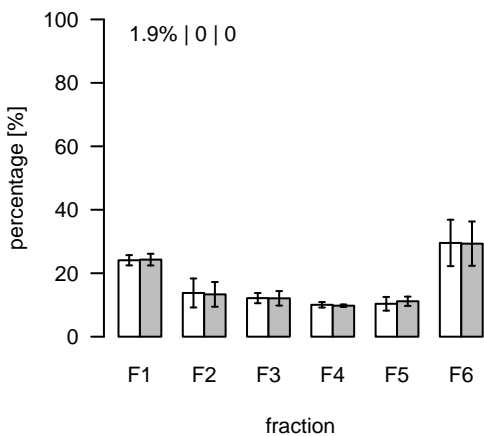

**S418 (m/z=470.32333; rt=12.53996)**  
T/S Cluster: S-12.5-10

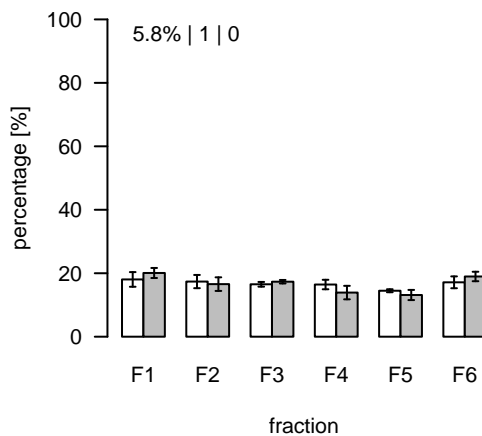

**S419 (m/z=819.52608; rt=12.5474)**  
T/S Cluster: S-12.5-11

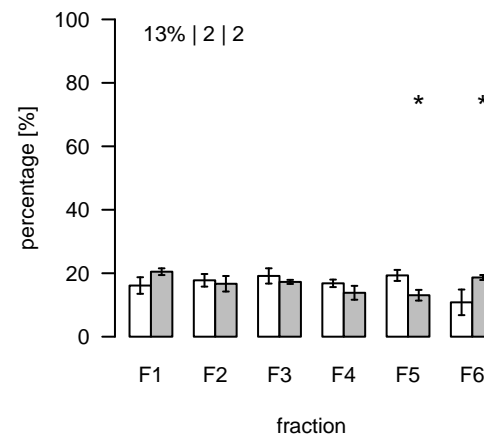

**S420 (m/z=707.404851; rt=12.54867)**  
T/S Cluster: S-12.5-12

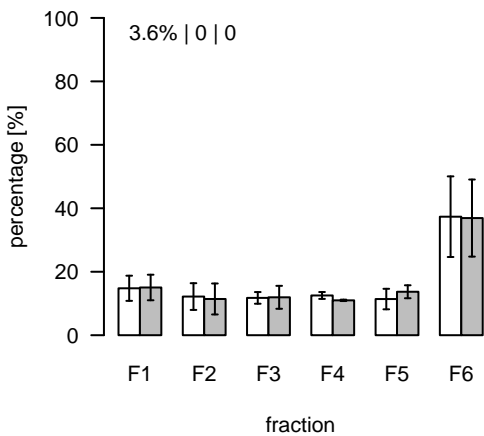

**S421 (m/z=363.253758; rt=12.54992)**  
T/S Cluster: S-12.5-13

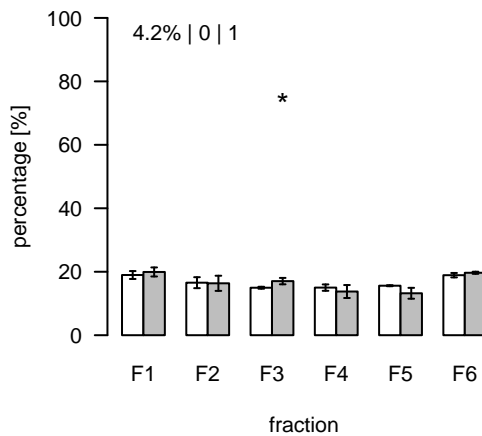

**S423 (m/z=399.274958; rt=12.55002)**  
T/S Cluster: S-12.6-1

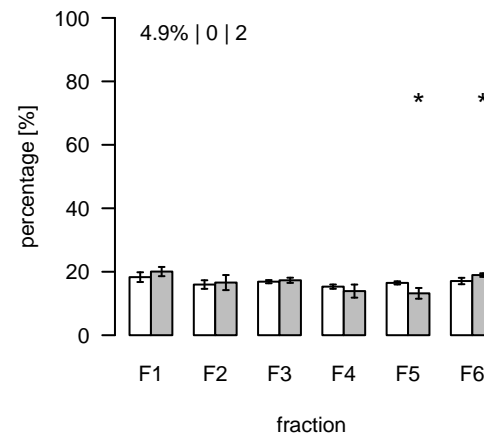

**S424 (m/z=458.323689; rt=12.55025)**  
T/S Cluster: S-12.6-2

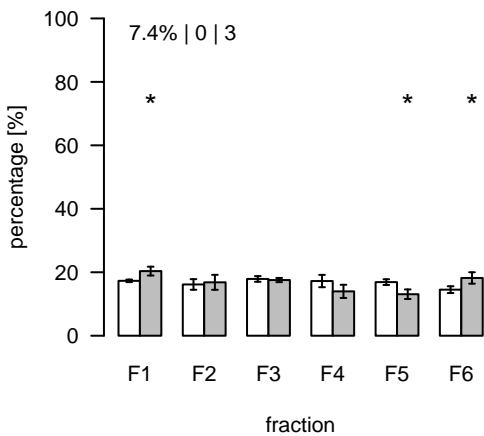

**S427 (m/z=210.628363; rt=12.55145)**  
T/S Cluster: S-12.6-3

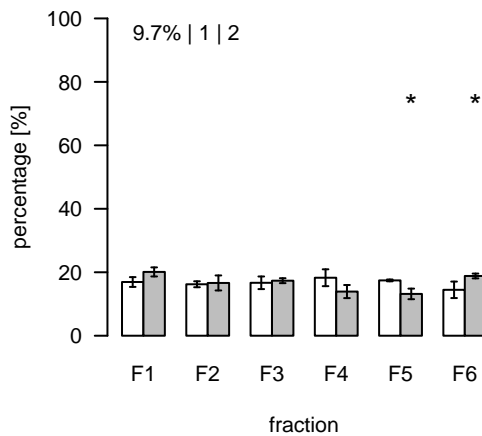

**S425 (m/z=210.630157; rt=12.55131)**  
T/S Cluster: S-12.6-3

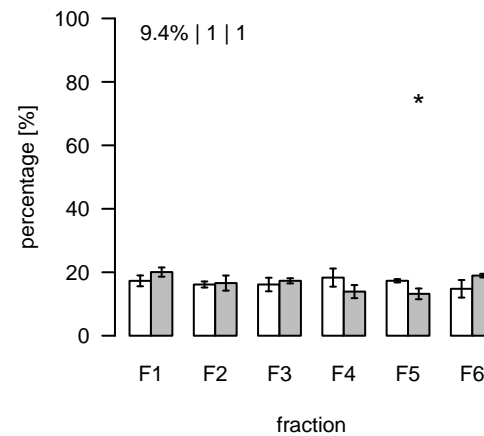

**S426 (m/z=421.242919; rt=12.55141)**  
T/S Cluster: S-12.6-4

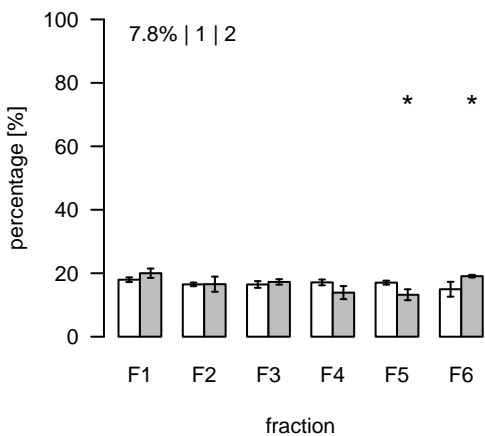

**S428 (m/z=422.260419; rt=12.55149)**  
T/S Cluster: S-12.6-5

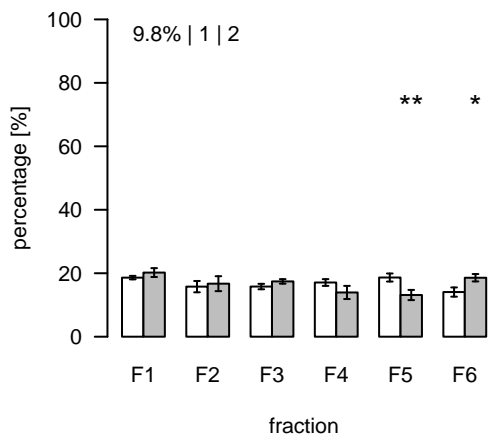

**S429 (m/z=289.216567; rt=12.55194)**  
T/S Cluster: S-12.6-6

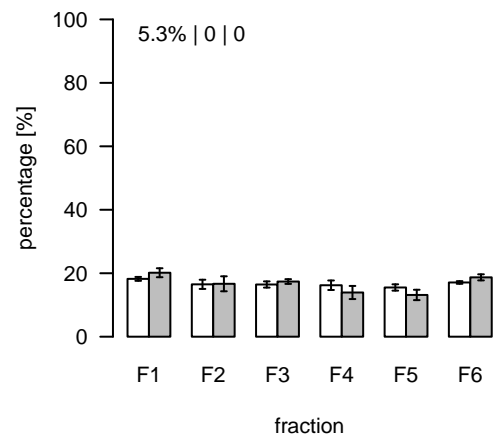

**S430 (m/z=416.301552; rt=12.55199)**  
T/S Cluster: S-12.6-7

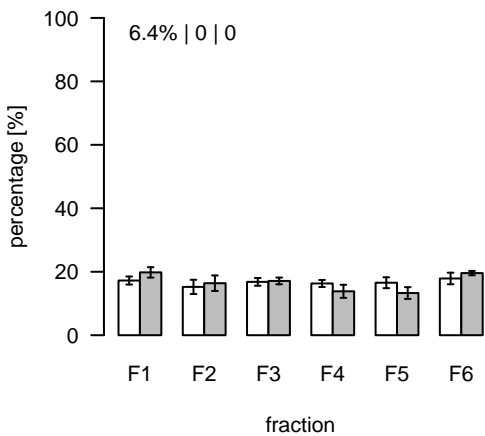

**S431 (m/z=421.257169; rt=12.55213)**  
T/S Cluster: S-12.6-8

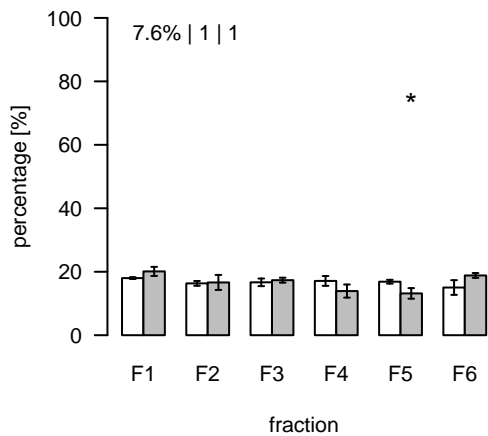

**S432 (m/z=437.229836; rt=12.55419)**  
T/S Cluster: S-12.6-9

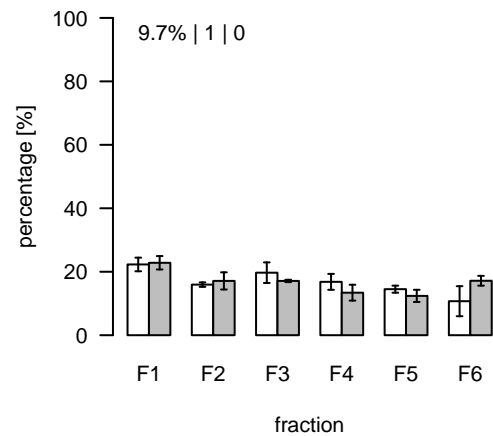

**S433 (m/z=858.48741; rt=12.55491)**  
T/S Cluster: S-12.6-10

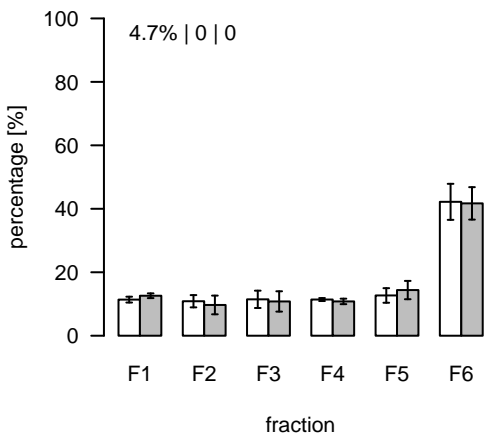

**S434 (m/z=382.267561; rt=12.55622)**  
T/S Cluster: S-12.6-11

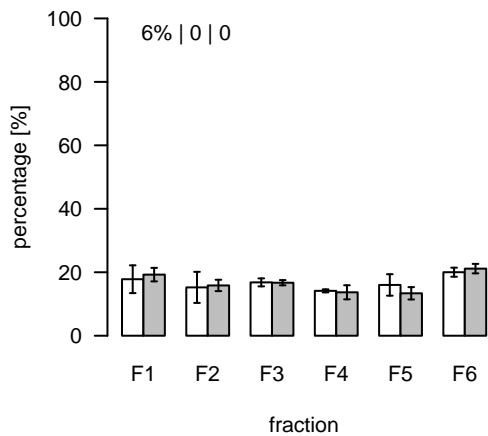

**S435 (m/z=381.264277; rt=12.5578)**  
T/S Cluster: S-12.6-12

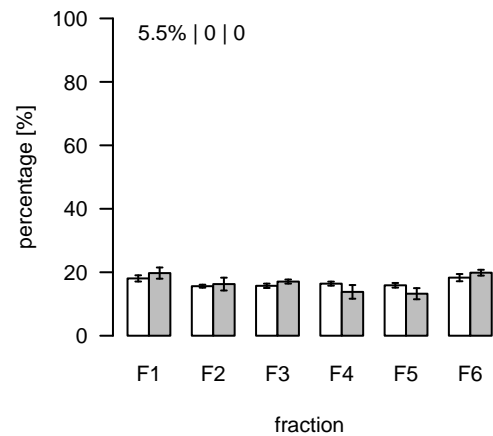

**S436 (m/z=882.57329; rt=12.57246)**  
T/S Cluster: S-12.6-13

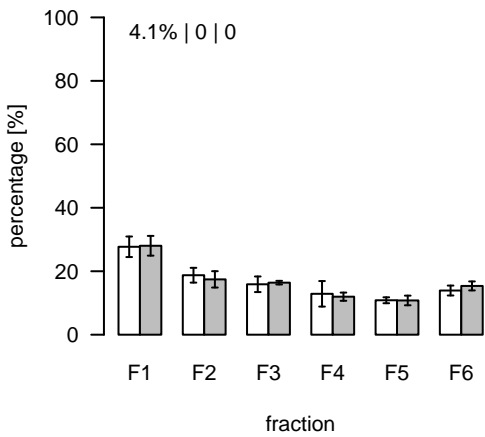

**S437 (m/z=702.397915; rt=12.5817)**  
T/S Cluster: S-12.6-14

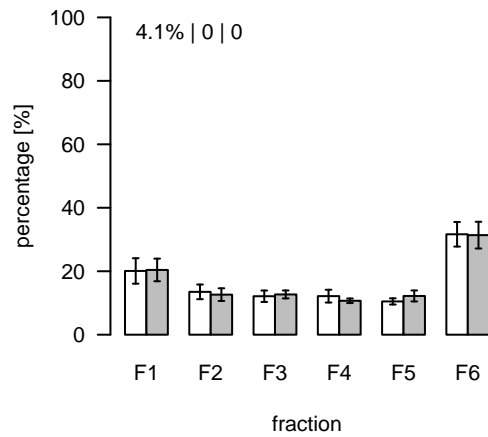

**S438 (m/z=823.761798; rt=12.60331)**  
T/S Cluster: S-12.6-15

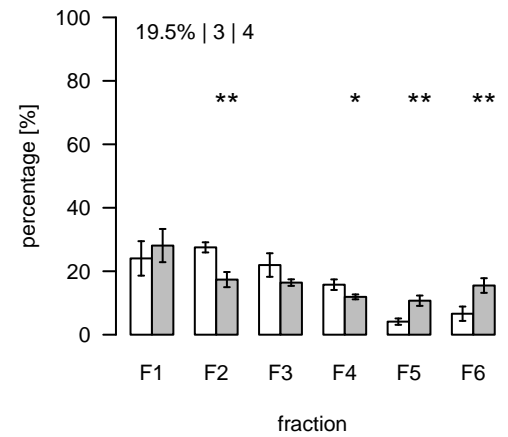

**S439 (m/z=426.28605; rt=12.61797)**  
T/S Cluster: S-12.6-16

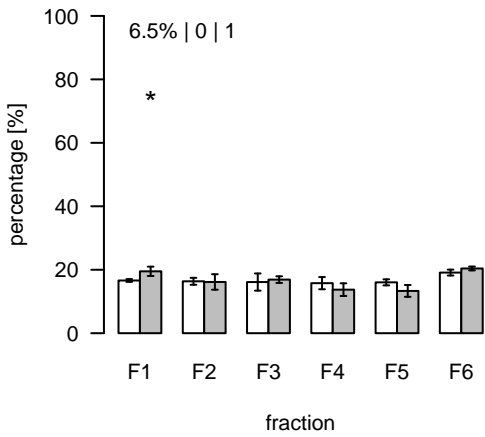

**S440 (m/z=720.412828; rt=12.62154)**  
T/S Cluster: S-12.6-17

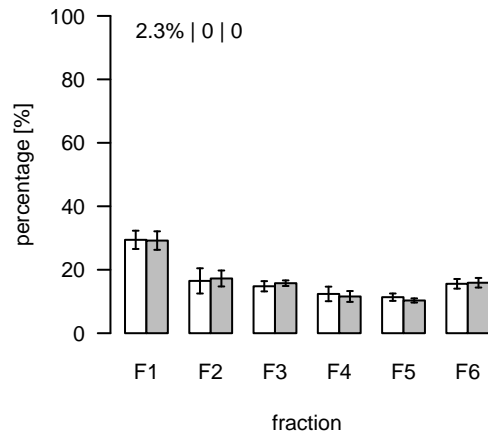

**S441 (m/z=894.474772; rt=12.64302)**  
T/S Cluster: S-12.6-18

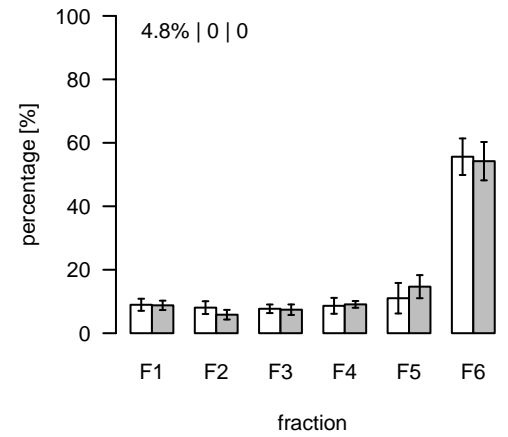

**S442 (m/z=894.474351; rt=12.64522)**  
T/S Cluster: S-12.6-18

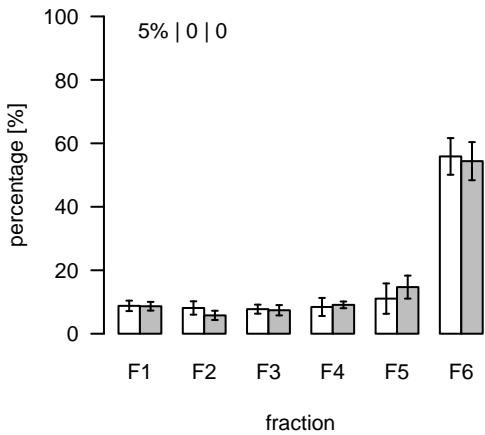

**S443 (m/z=895.476924; rt=12.64618)**  
T/S Cluster: S-12.6-19

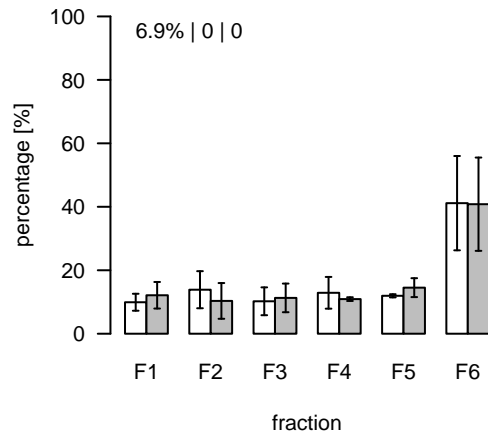

**S444 (m/z=895.477673; rt=12.64755)**  
T/S Cluster: S-12.6-19

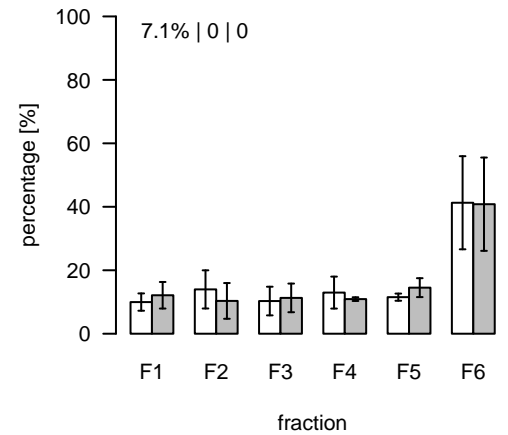



**S445 (m/z=437.758833; rt=12.65538)**  
T/S Cluster: S-12.7-1

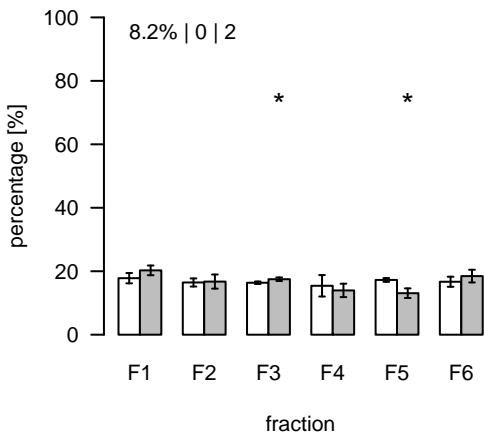

**S446 (m/z=718.39486; rt=12.66274)**  
T/S Cluster: S-12.7-2

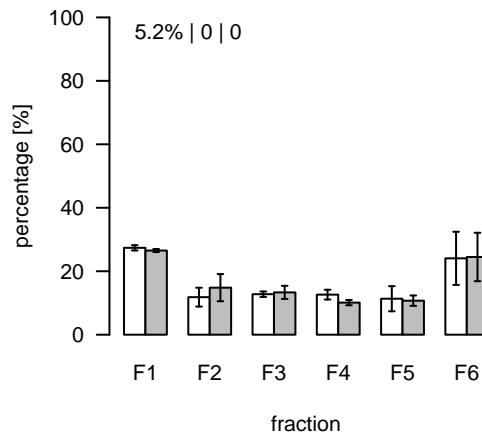

**S447 (m/z=718.39483; rt=12.66275)**  
T/S Cluster: S-12.7-2

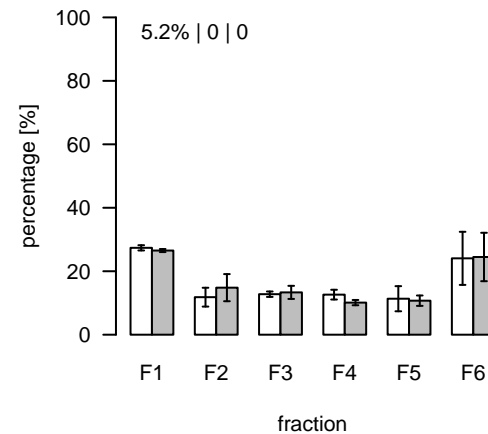

**S458 (m/z=632.358038; rt=12.72538)**  
T/S Cluster: S-12.7-2

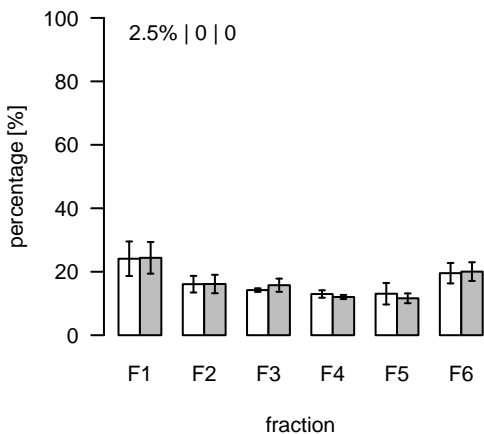

**S448 (m/z=709.343971; rt=12.67456)**  
T/S Cluster: S-12.7-3

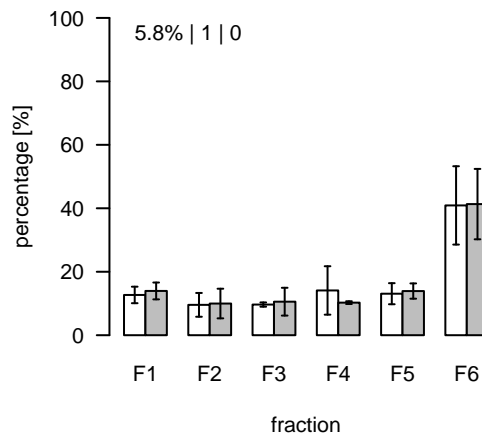

**S449 (m/z=704.38765; rt=12.67473)**  
T/S Cluster: S-12.7-4

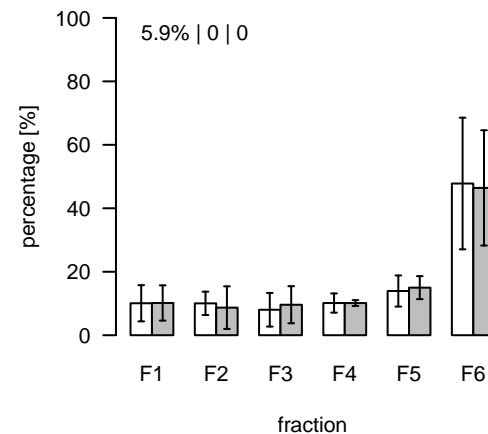

**S450 (m/z=704.387894; rt=12.67521)**  
T/S Cluster: S-12.7-4

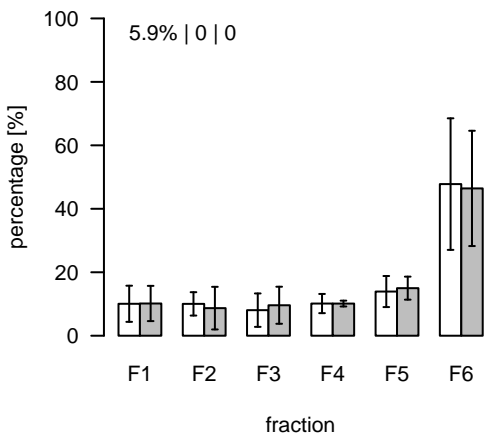

**S451 (m/z=705.388409; rt=12.68155)**  
T/S Cluster: S-12.7-5

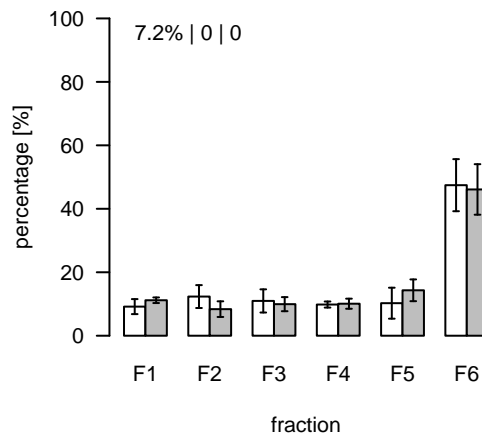

**S452 (m/z=705.387151; rt=12.68291)**  
T/S Cluster: S-12.7-5

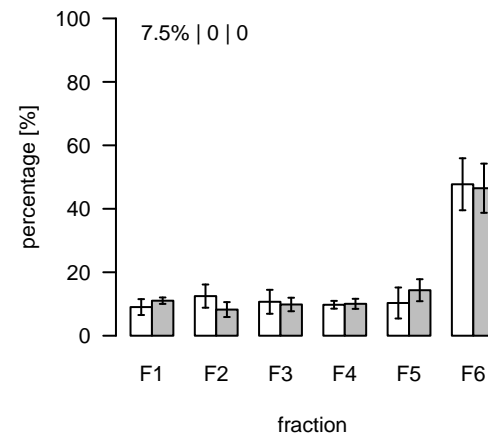

**S454 (m/z=722.427188; rt=12.6945)**  
T/S Cluster: S-12.7-6

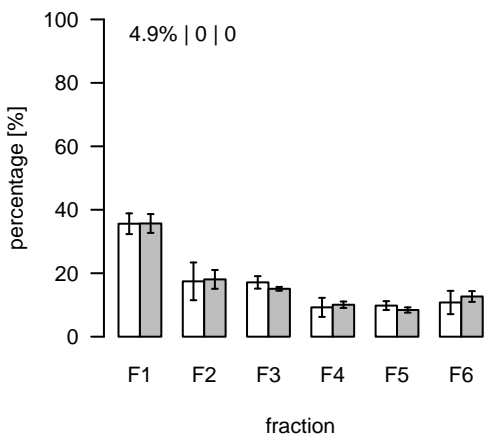

**S453 (m/z=723.43082; rt=12.69324)**  
T/S Cluster: S-12.7-6

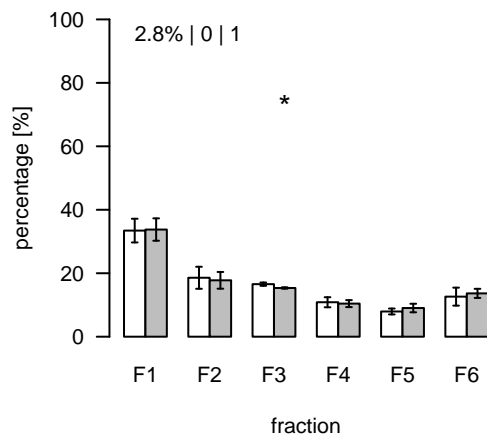

**S455 (m/z=808.429105; rt=12.70127)**  
T/S Cluster: S-12.7-7

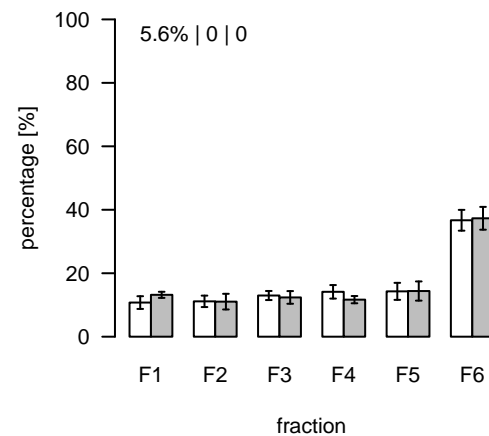

**S456 (m/z=922.504506; rt=12.708)**  
T/S Cluster: S-12.7-8

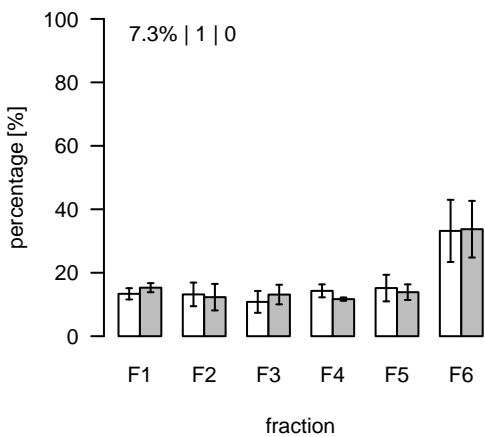

**S457 (m/z=437.789894; rt=12.72427)**  
T/S Cluster: S-12.7-9

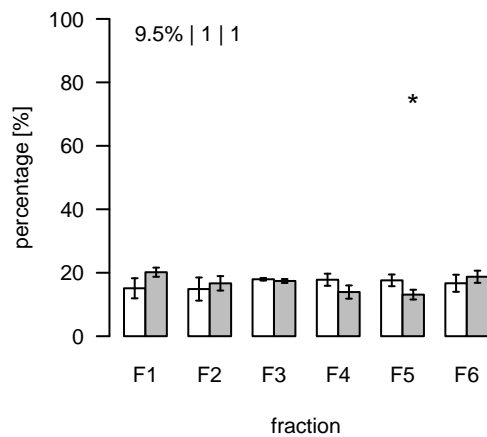

**S459 (m/z=374.219087; rt=12.82547)**  
T/S Cluster: S-12.8-1

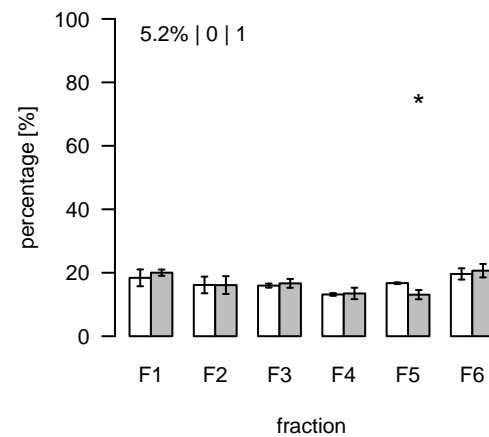

**S460 (m/z=366.275916; rt=12.83015)**  
T/S Cluster: S-12.8-2

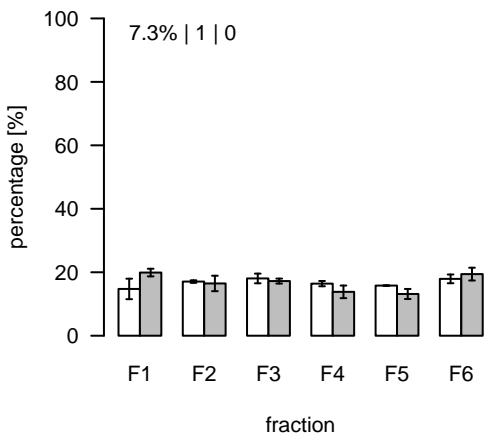

**S462 (m/z=366.275717; rt=12.86085)**  
T/S Cluster: S-12.9-1

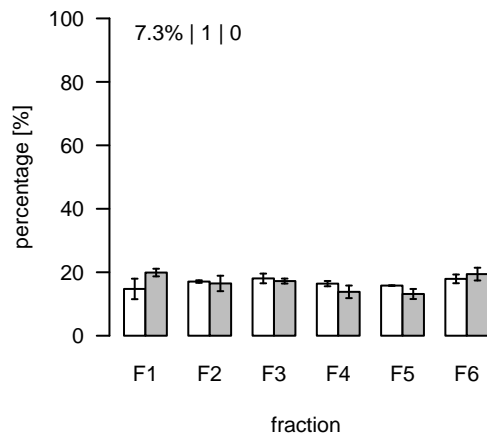

**S461 (m/z=366.267965; rt=12.86016)**  
T/S Cluster: S-12.9-1

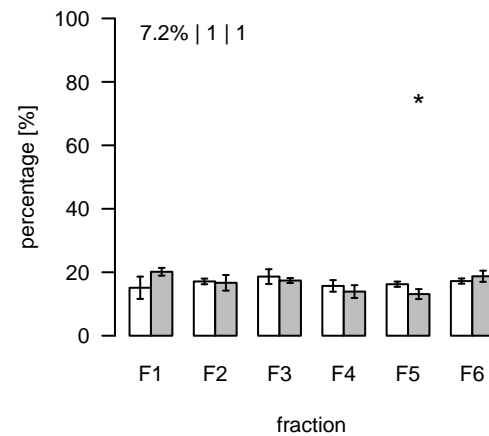

**S464 (m/z=263.121651; rt=12.8697)**  
T/S Cluster: S-12.9-2

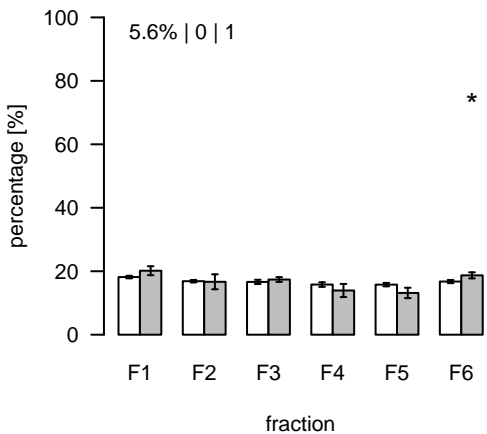

**S463 (m/z=263.11771; rt=12.86912)**  
T/S Cluster: S-12.9-2

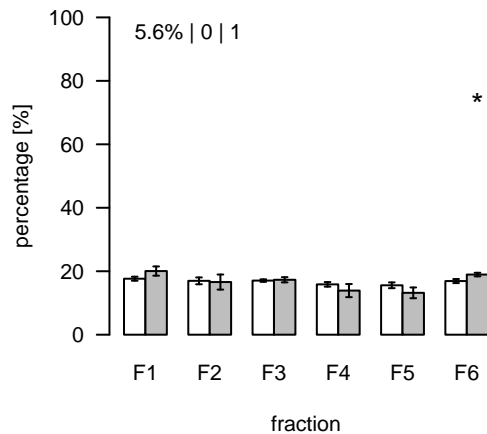

**S465 (m/z=687.424499; rt=12.90915)**  
T/S Cluster: S-12.9-3

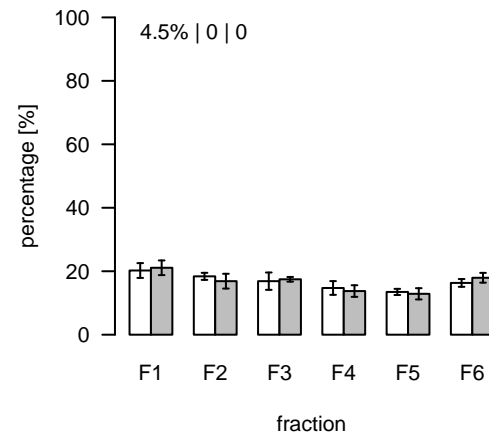

**S466 (m/z=666.496271; rt=12.90916)**  
T/S Cluster: S-12.9-4

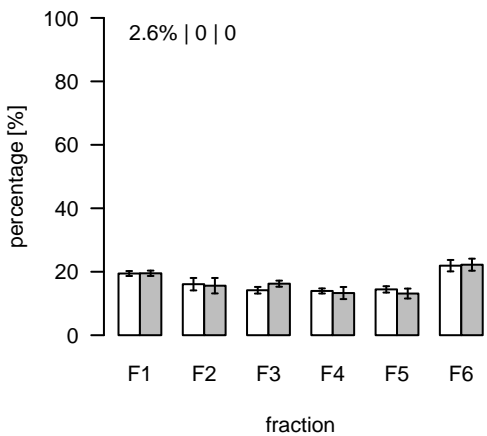

**S467 (m/z=108.413383; rt=12.9093)**  
T/S Cluster: S-12.9-5

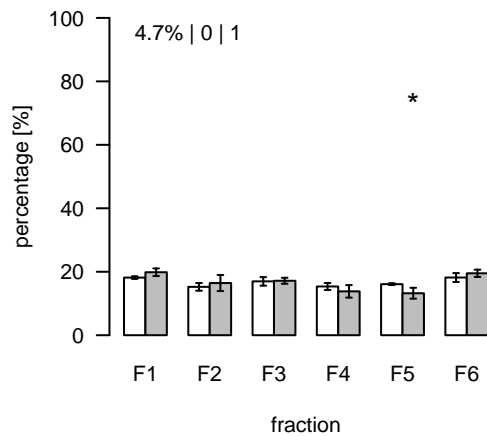

**S468 (m/z=667.499311; rt=12.90962)**  
T/S Cluster: S-12.9-6

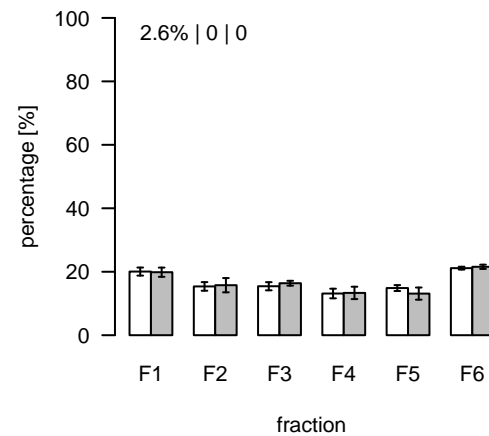

**S469 (m/z=326.232949; rt=12.90972)**  
T/S Cluster: S-12.9-7

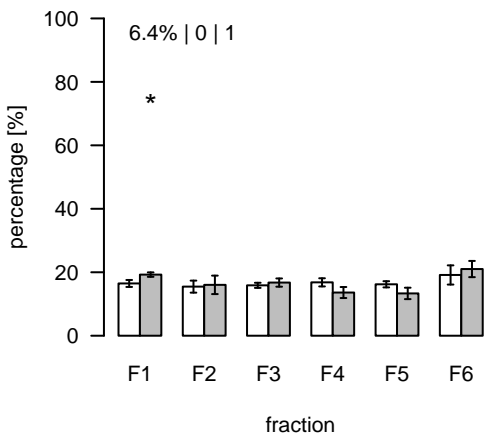

**S470 (m/z=325.237934; rt=12.90975)**  
T/S Cluster: S-12.9-8

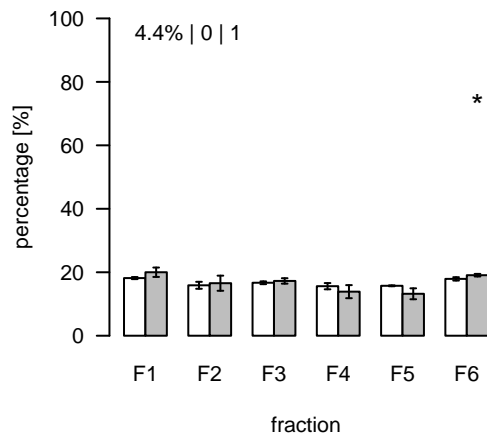

**S471 (m/z=162.619305; rt=12.90997)**  
T/S Cluster: S-12.9-8

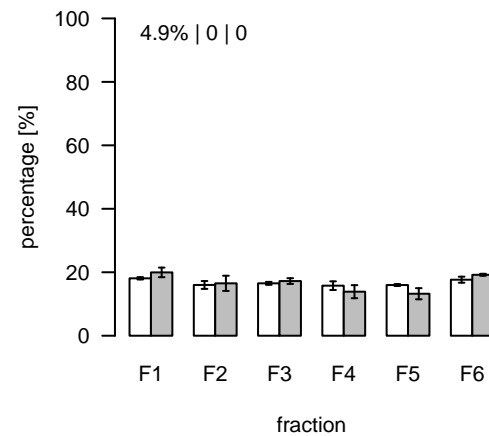

**S472 (m/z=326.241208; rt=12.91008)**  
T/S Cluster: S-12.9-9

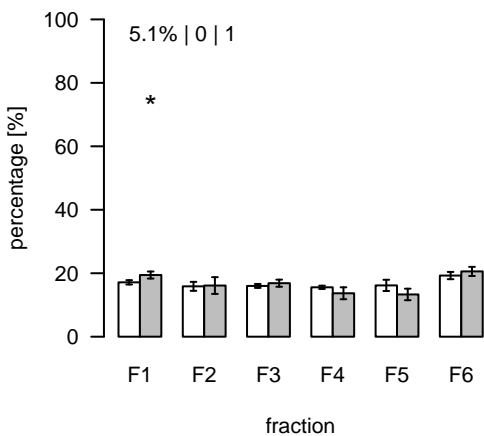

**S473 (m/z=671.451641; rt=12.9109)**  
T/S Cluster: S-12.9-10

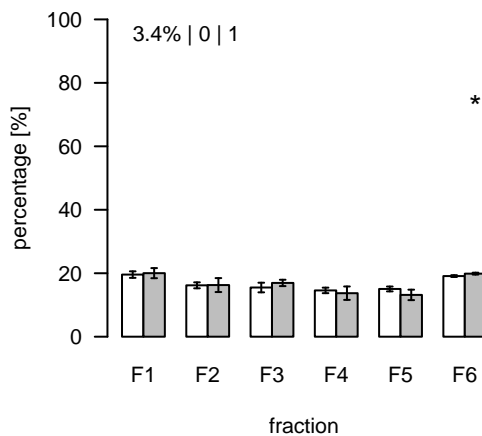

**S474 (m/z=672.45503; rt=12.91091)**  
T/S Cluster: S-12.9-10

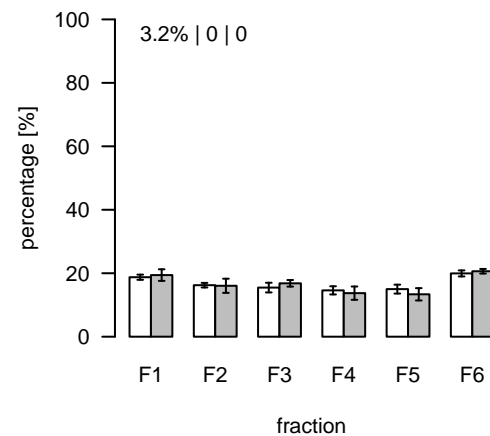

**S476 (m/z=335.726842; rt=12.91097)**  
T/S Cluster: S-12.9-10

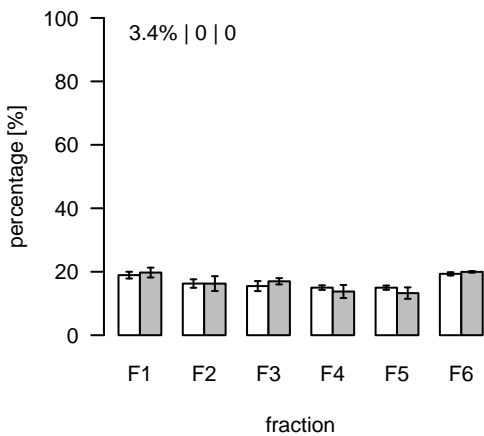

**S478 (m/z=672.414907; rt=12.91116)**  
T/S Cluster: S-12.9-10

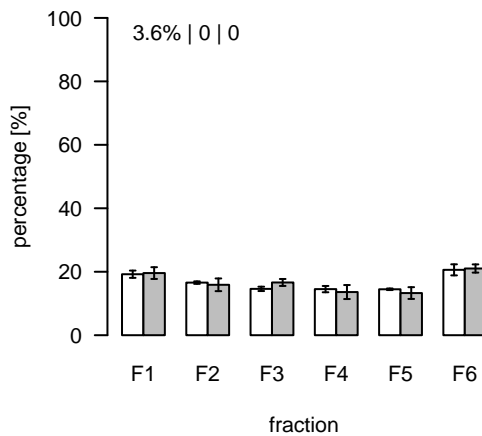

**S481 (m/z=336.227539; rt=12.91138)**  
T/S Cluster: S-12.9-10

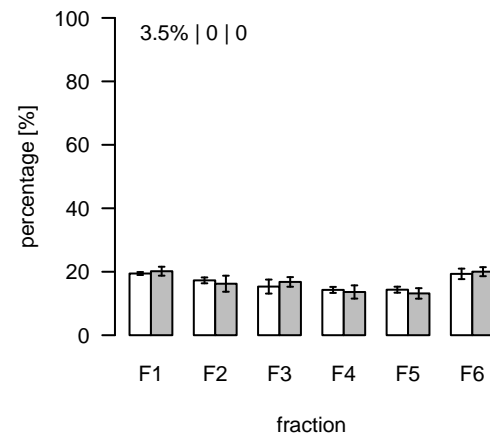

**S480 (m/z=336.232252; rt=12.91123)**  
T/S Cluster: S-12.9-10

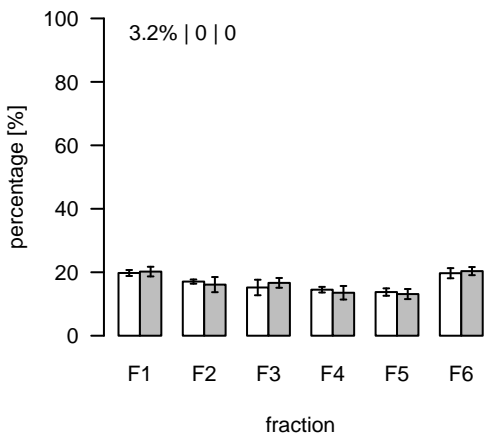

**S475 (m/z=223.820214; rt=12.91093)**  
T/S Cluster: S-12.9-10

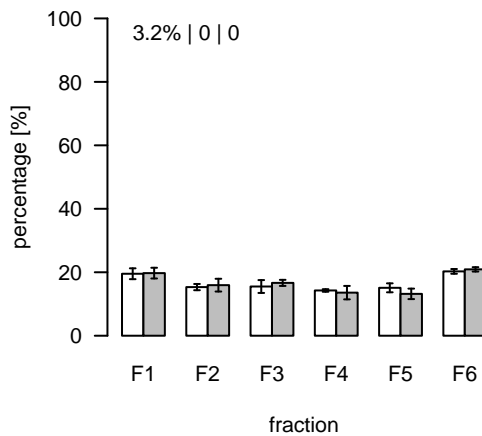

**S477 (m/z=279.232332; rt=12.91099)**  
T/S Cluster: S-12.9-11

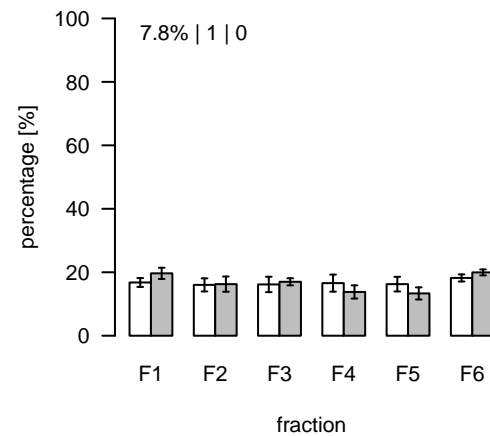

**S479 (m/z=290.219843; rt=12.91121)**  
T/S Cluster: S-12.9-12

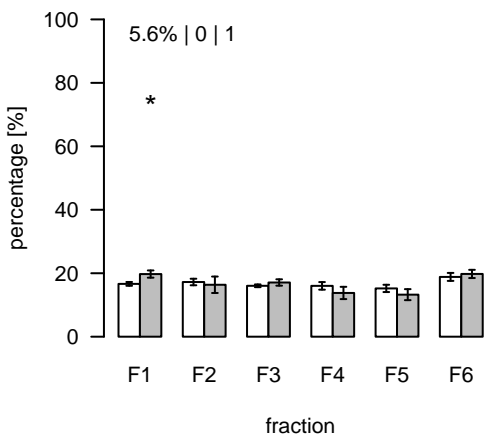

**S482 (m/z=673.458431; rt=12.91163)**  
T/S Cluster: S-12.9-13

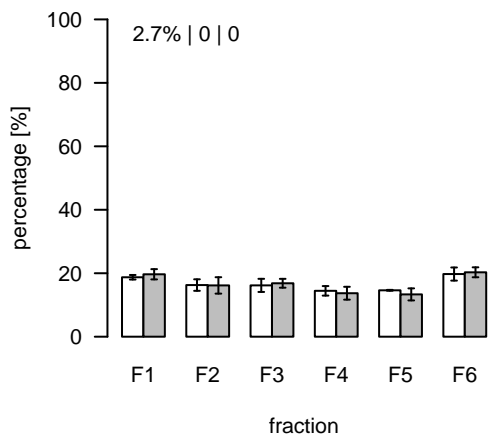

**S483 (m/z=289.210839; rt=12.91175)**  
T/S Cluster: S-12.9-14

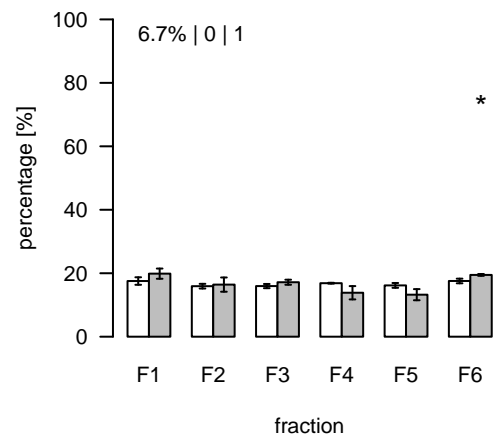

**S484 (m/z=261.22155; rt=12.9119)**  
T/S Cluster: S-12.9-15

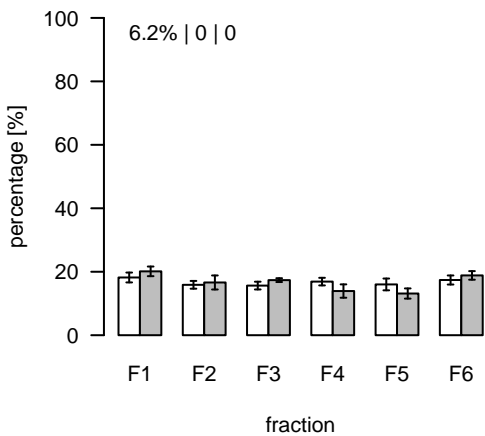

**S485 (m/z=289.216643; rt=12.91196)**  
T/S Cluster: S-12.9-16

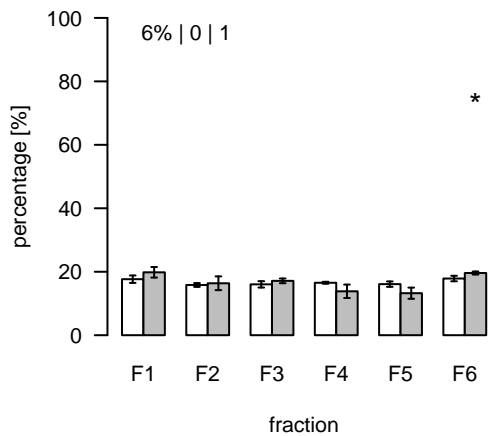

**S486 (m/z=363.19398; rt=12.91223)**  
T/S Cluster: S-12.9-17

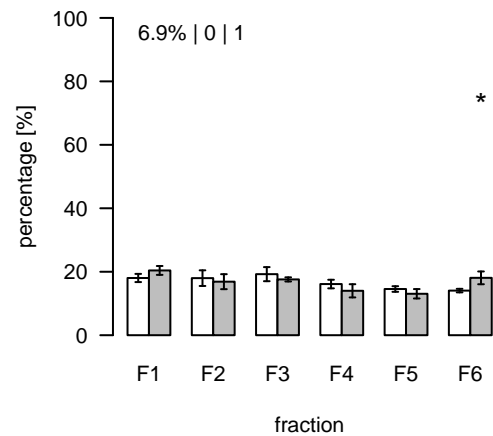

**S487 (m/z=342.264794; rt=12.91227)**  
T/S Cluster: S-12.9-18

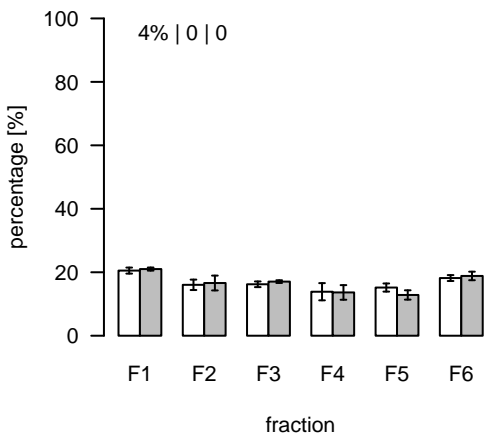

**S490 (m/z=308.230632; rt=12.91259)**  
T/S Cluster: S-12.9-19

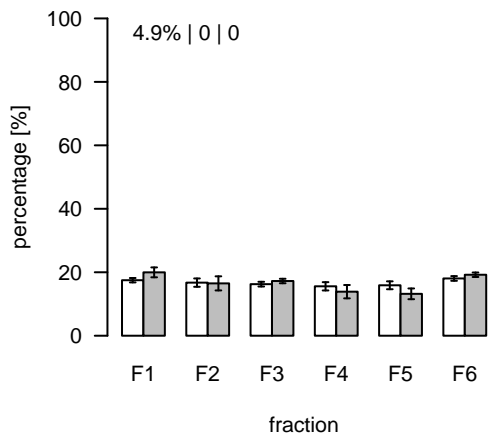

**S488 (m/z=308.223684; rt=12.91229)**  
T/S Cluster: S-12.9-19

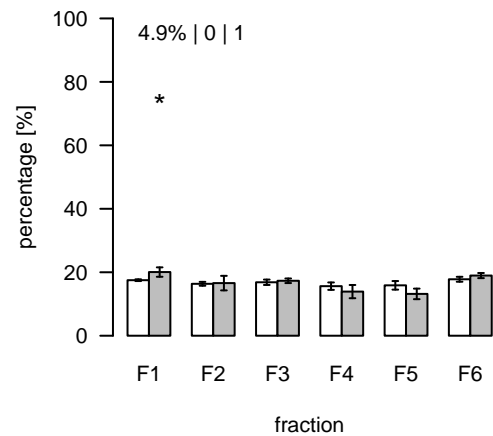

**S498 (m/z=384.286632; rt=12.91298)**  
T/S Cluster: S-12.9-20

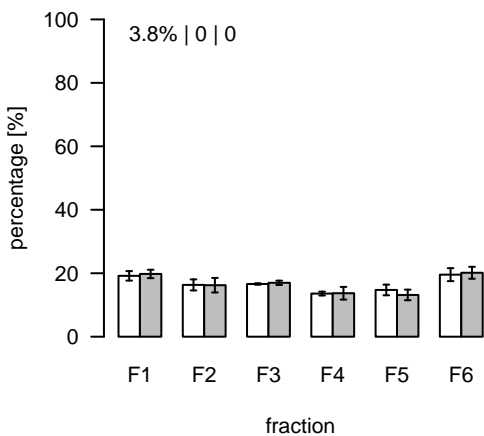

**S489 (m/z=384.278791; rt=12.91247)**  
T/S Cluster: S-12.9-20

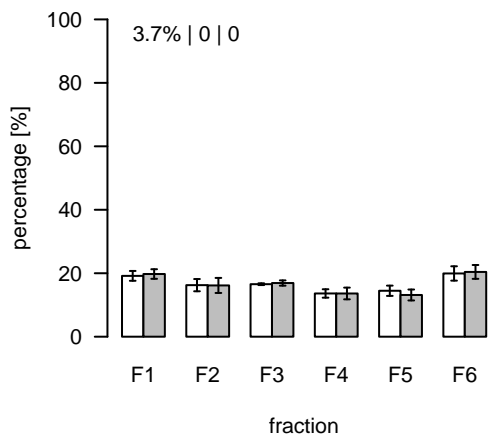

**S495 (m/z=307.2272; rt=12.91274)**  
T/S Cluster: S-12.9-21

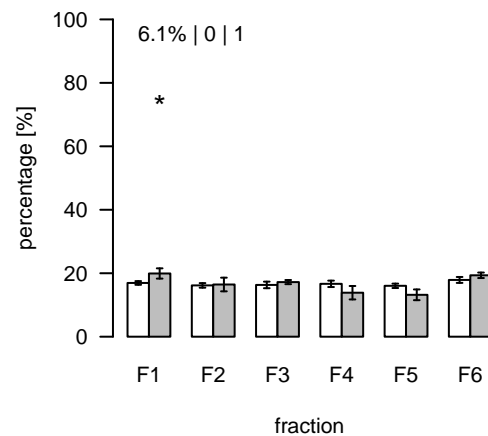

**S491 (m/z=307.21851; rt=12.91265)**  
T/S Cluster: S-12.9-21

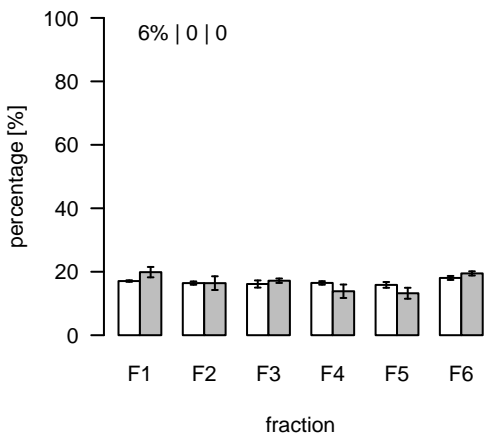

**S492 (m/z=153.613887; rt=12.91265)**  
T/S Cluster: S-12.9-22

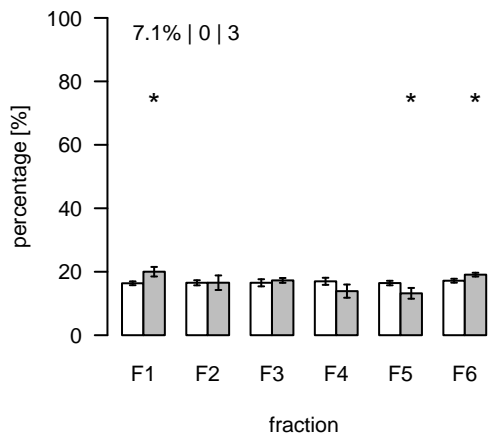

**S493 (m/z=348.216957; rt=12.91269)**  
T/S Cluster: S-12.9-23

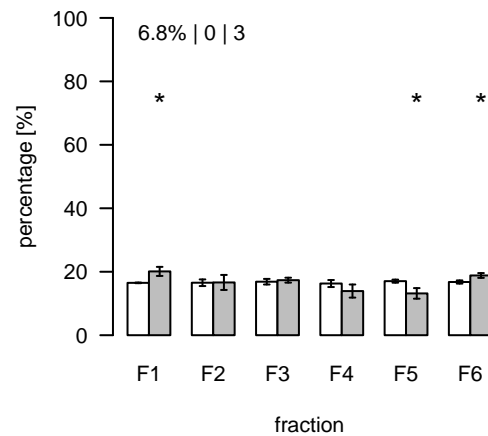

**S494 (m/z=102.409764; rt=12.91273)**  
T/S Cluster: S-12.9-24

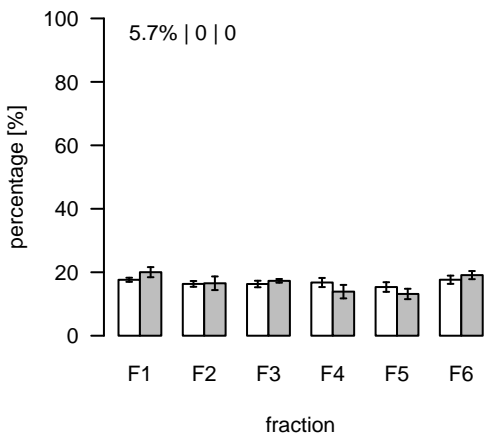

**S496 (m/z=173.610324; rt=12.91293)**  
T/S Cluster: S-12.9-25

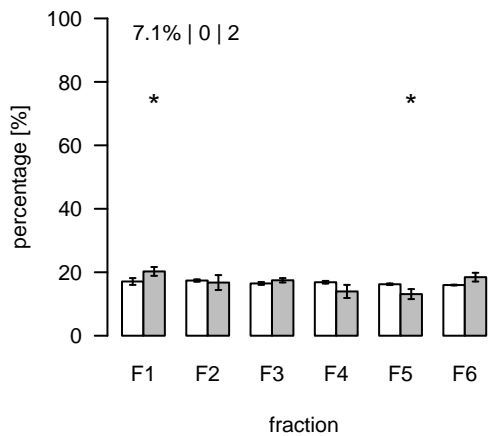

**S497 (m/z=348.223531; rt=12.91294)**  
T/S Cluster: S-12.9-26

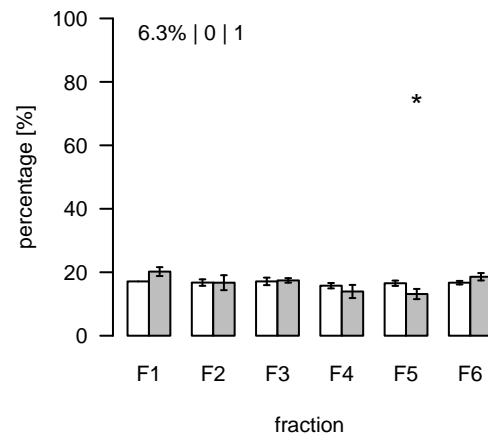

**S499 (m/z=347.219921; rt=12.91305)**  
T/S Cluster: S-12.9-27

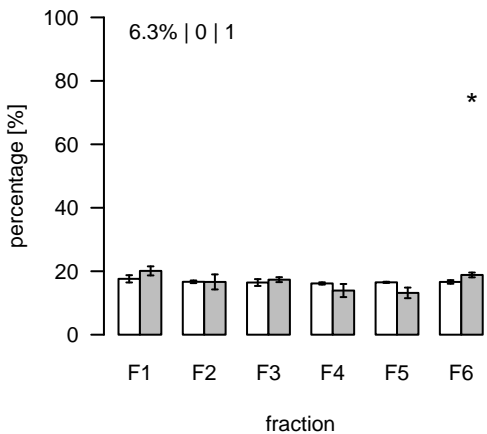

**S500 (m/z=317.132285; rt=12.92367)**  
T/S Cluster: S-12.9-28

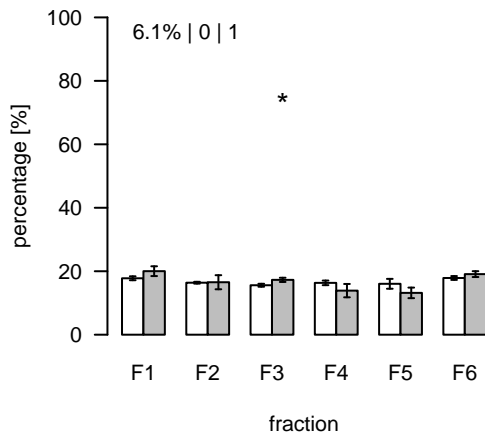

**S501 (m/z=756.387145; rt=12.9663)**  
T/S Cluster: S-13-1

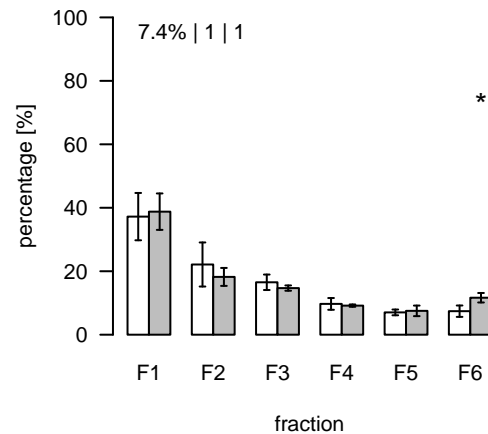

**S502 (m/z=344.179703; rt=12.98455)**  
T/S Cluster: S-13-2

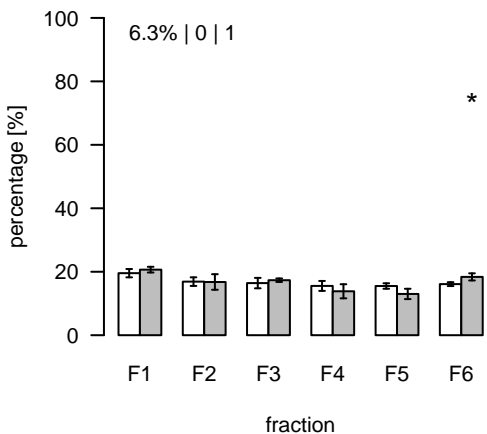

**S503 (m/z=706.432773; rt=12.99644)**  
T/S Cluster: S-13-3

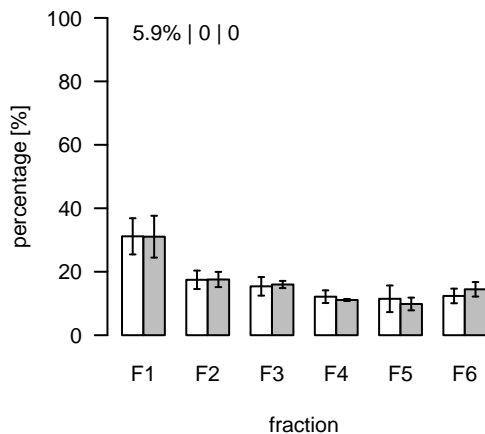

**S504 (m/z=706.43283; rt=12.99644)**  
T/S Cluster: S-13-3

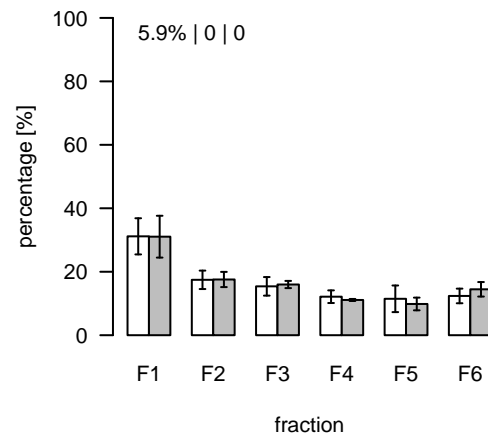

**S505 (m/z=334.275069; rt=12.999)**  
T/S Cluster: S-13-4

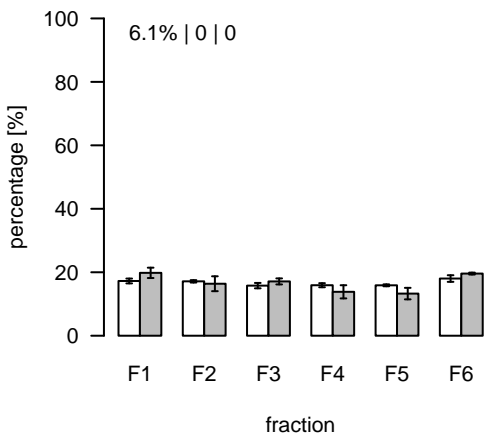

**S506 (m/z=880.493309; rt=13.01226)**  
T/S Cluster: S-13-5

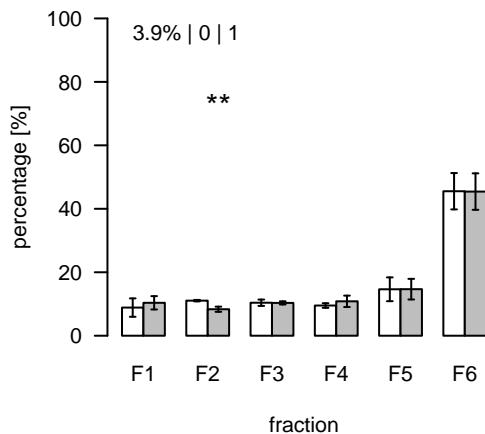

**S507 (m/z=880.526406; rt=13.01741)**  
T/S Cluster: S-13-5

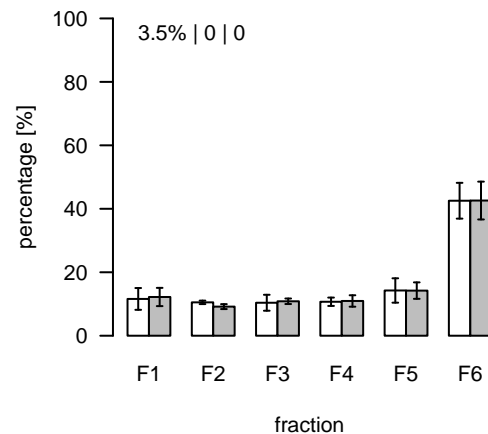

**S508 (m/z=366.300967; rt=13.02353)**  
T/S Cluster: S-13-6

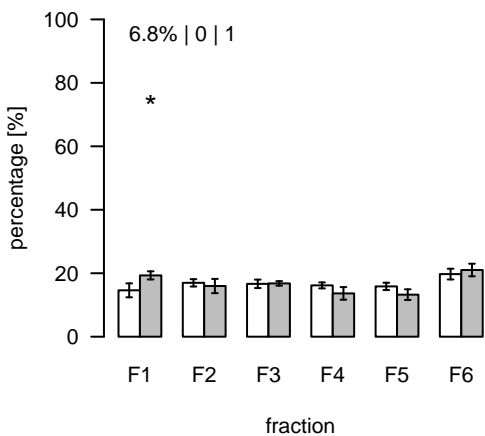

**S509 (m/z=307.227147; rt=13.05273)**  
T/S Cluster: S-13.1-1

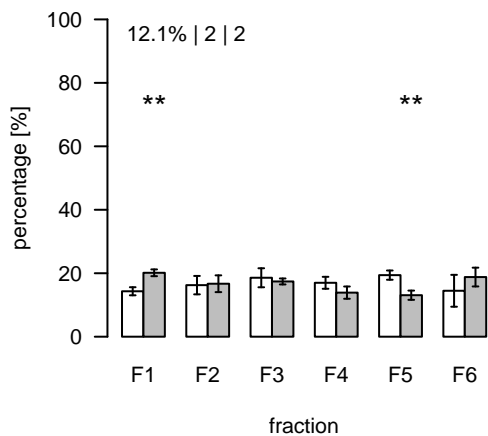

**S510 (m/z=325.237852; rt=13.05783)**  
T/S Cluster: S-13.1-2

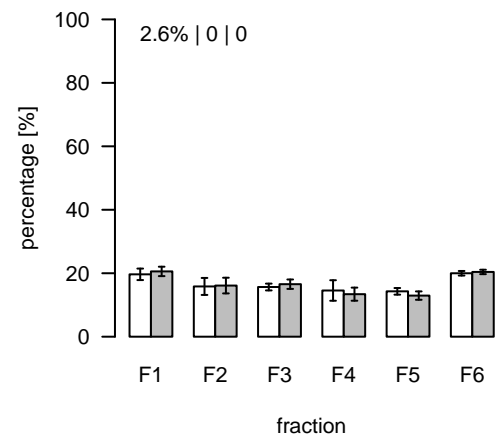

**S511 (m/z=736.405106; rt=13.07698)**  
T/S Cluster: S-13.1-3

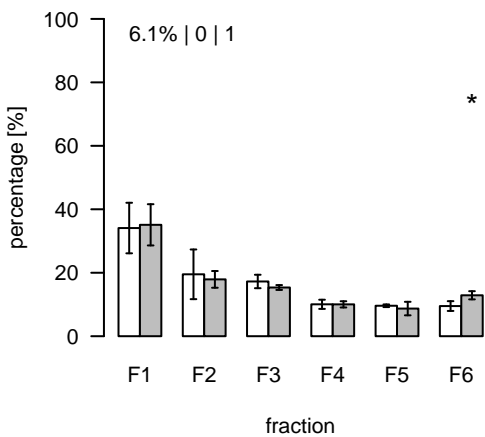

**S512 (m/z=424.198663; rt=13.10018)**  
T/S Cluster: S-13.1-4

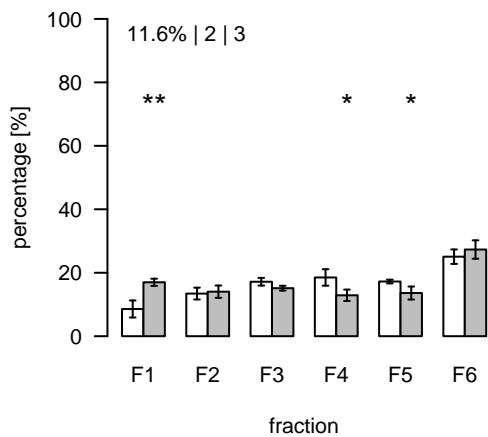

**S513 (m/z=400.234576; rt=13.11391)**  
T/S Cluster: S-13.1-5

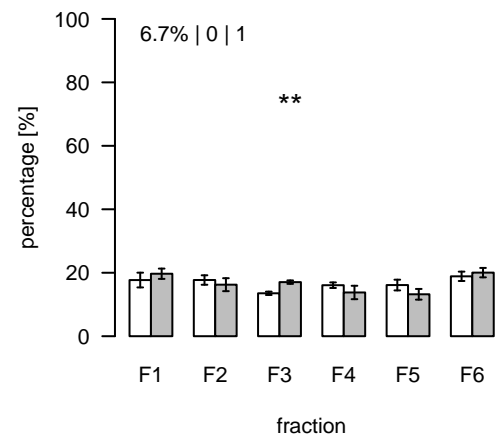

**S514 (m/z=421.25703; rt=13.13309)**  
T/S Cluster: S-13.1-6

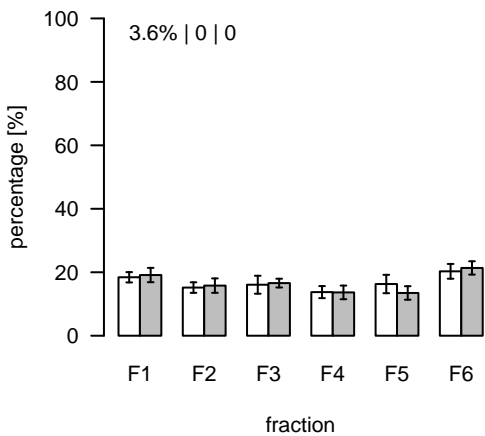

**S515 (m/z=734.494082; rt=13.1805)**  
T/S Cluster: S-13.2-1

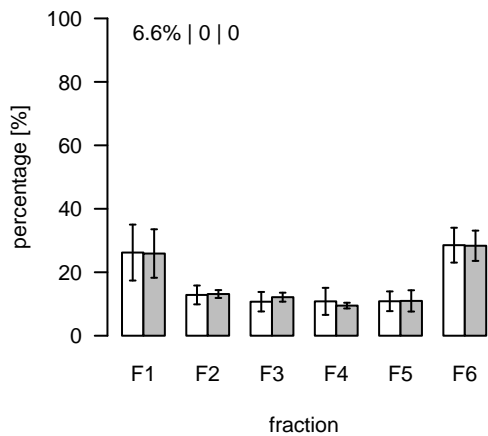

**S516 (m/z=437.744462; rt=13.20008)**  
T/S Cluster: S-13.2-2

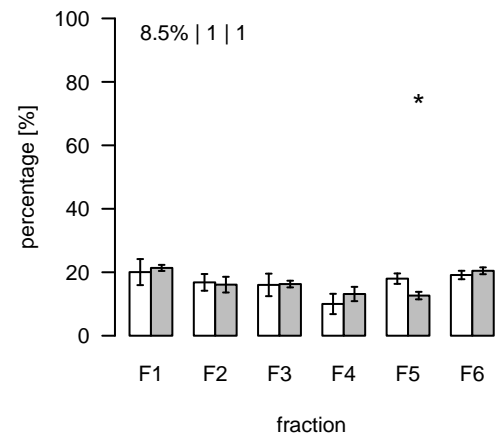



**S517 (m/z=437.802958; rt=13.20877)**  
T/S Cluster: S-13.2-3

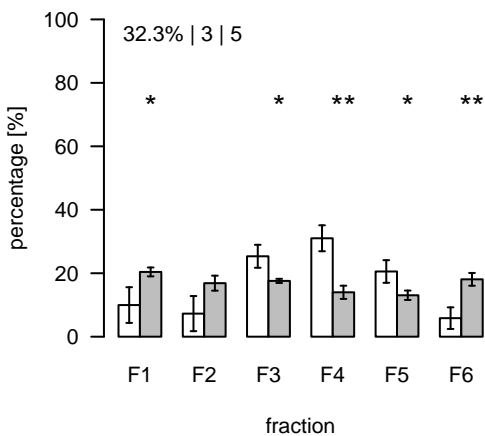

**S520 (m/z=299.050765; rt=13.23219)**  
T/S Cluster: S-13.2-4

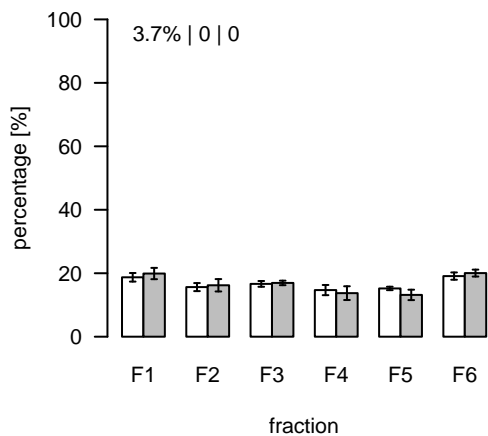

**S518 (m/z=299.045914; rt=13.23136)**  
T/S Cluster: S-13.2-4

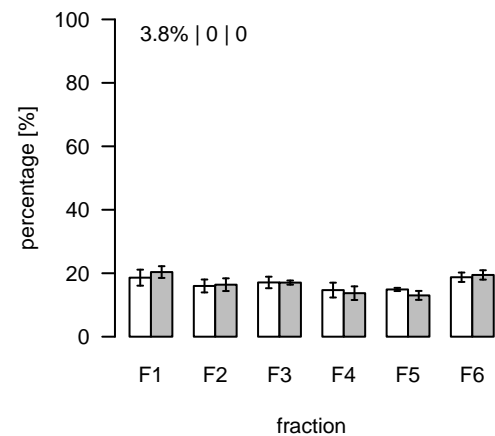

**S519 (m/z=300.042948; rt=13.23151)**  
T/S Cluster: S-13.2-5

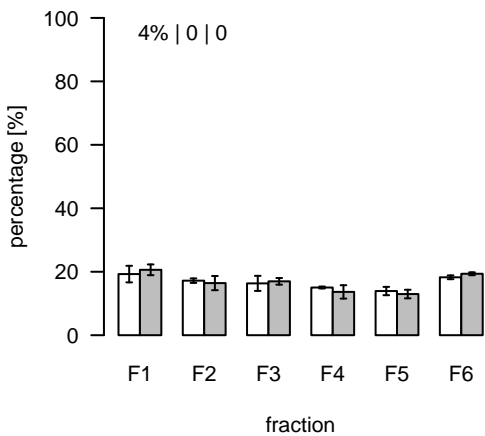

**S523 (m/z=298.047281; rt=13.23269)**  
T/S Cluster: S-13.2-6

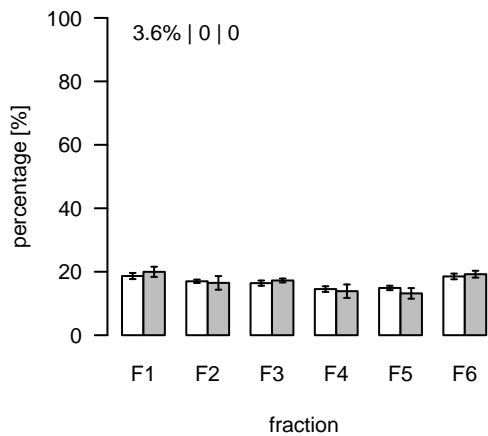

**S522 (m/z=298.042198; rt=13.23265)**  
T/S Cluster: S-13.2-6

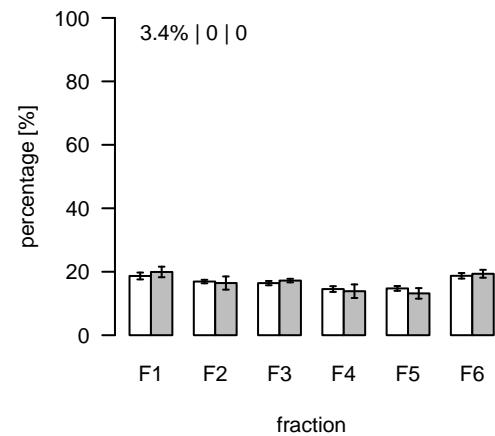

**S521 (m/z=149.023759; rt=13.23239)**  
T/S Cluster: S-13.2-6

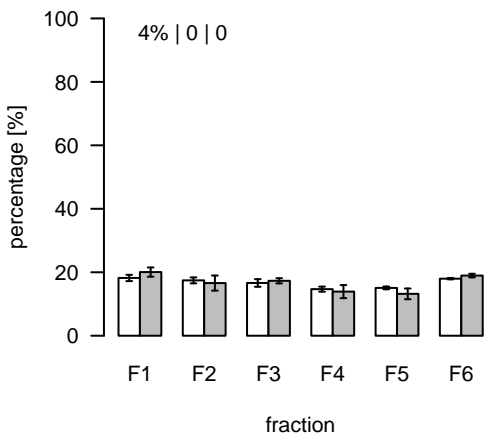

**S524 (m/z=398.281136; rt=13.28954)**  
T/S Cluster: S-13.3-1

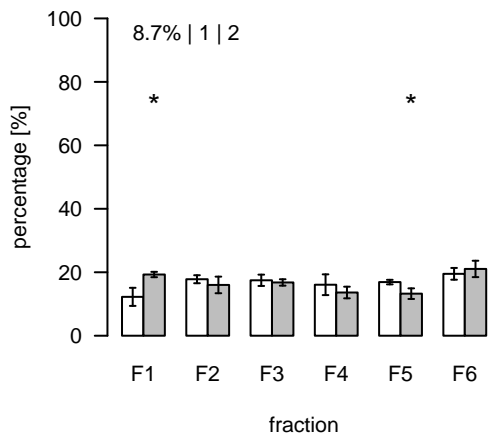

**S525 (m/z=706.431756; rt=13.30949)**  
T/S Cluster: S-13.3-2

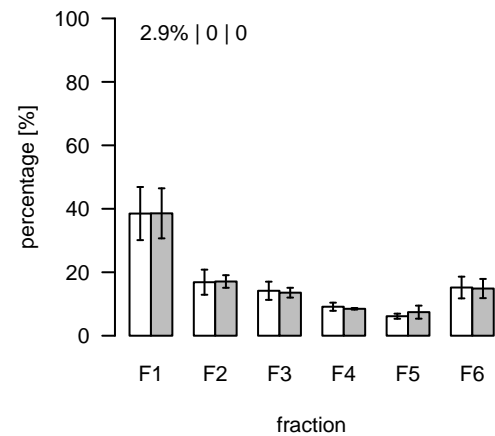

**S526 (m/z=706.431841; rt=13.30949)**  
T/S Cluster: S-13.3-2

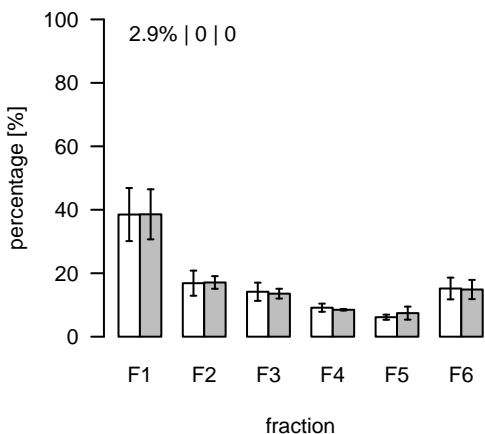

**S527 (m/z=288.253794; rt=13.31835)**  
T/S Cluster: S-13.3-3

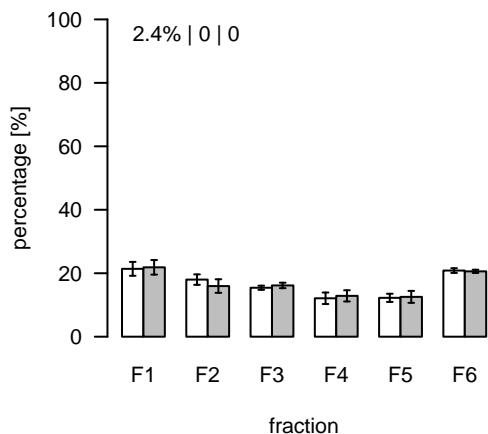

**S528 (m/z=313.137456; rt=13.41236)**  
T/S Cluster: S-13.4-1

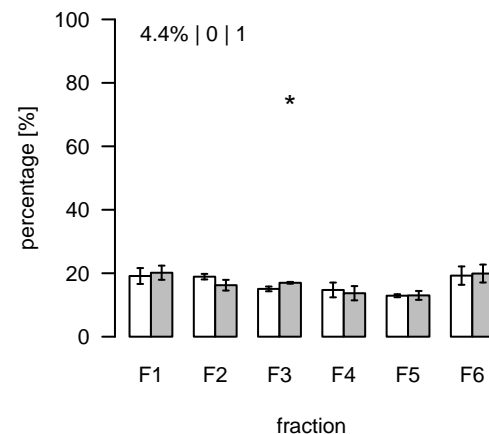

**S529 (m/z=402.250351; rt=13.42082)**  
T/S Cluster: S-13.4-2

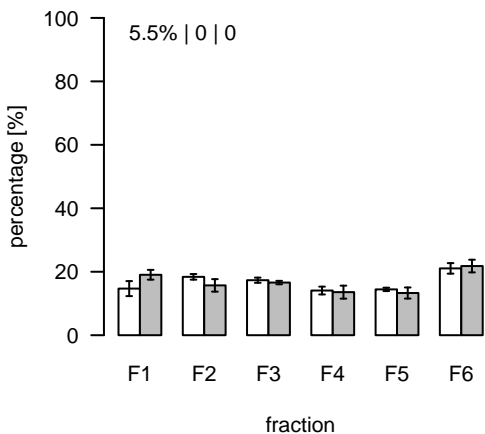

**S530 (m/z=704.415994; rt=13.42472)**  
T/S Cluster: S-13.4-3

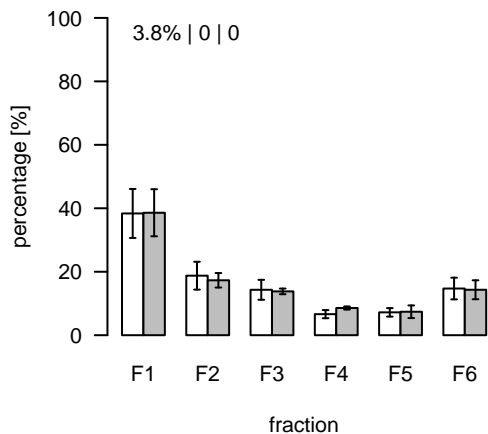

**S531 (m/z=289.216698; rt=13.44595)**  
T/S Cluster: S-13.4-4

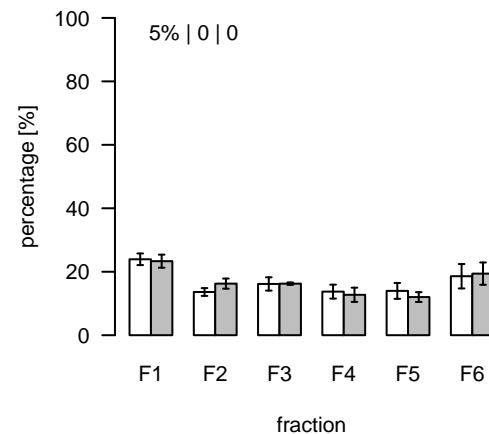

**S532 (m/z=307.227236; rt=13.44778)**  
T/S Cluster: S-13.4-5

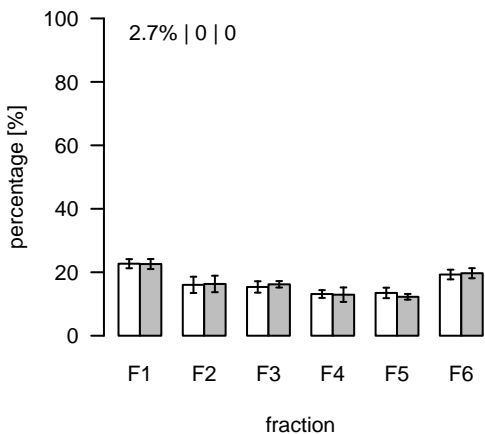

**S533 (m/z=347.219949; rt=13.44811)**  
T/S Cluster: S-13.4-5

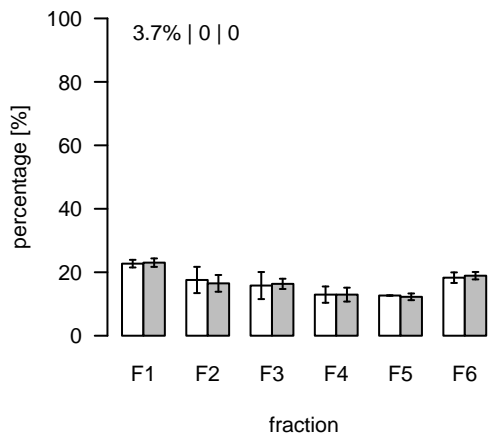

**S534 (m/z=231.095347; rt=13.48469)**  
T/S Cluster: S-13.5-1

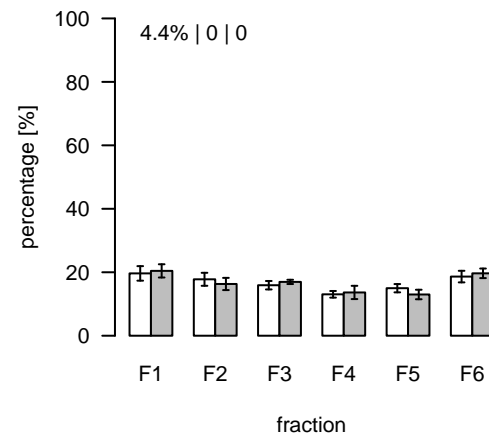

**S535 (m/z=437.769042; rt=13.50714)**  
T/S Cluster: S-13.5-2

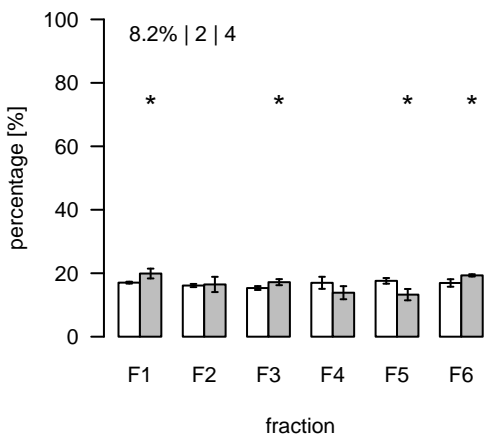

**S536 (m/z=823.447043; rt=13.5223)**  
T/S Cluster: S-13.5-3

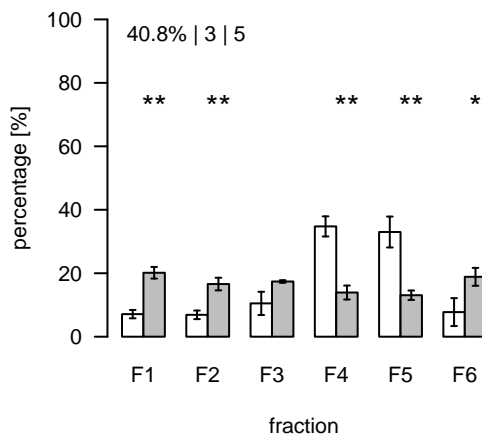

**S537 (m/z=347.21997; rt=13.55716)**  
T/S Cluster: S-13.6-1

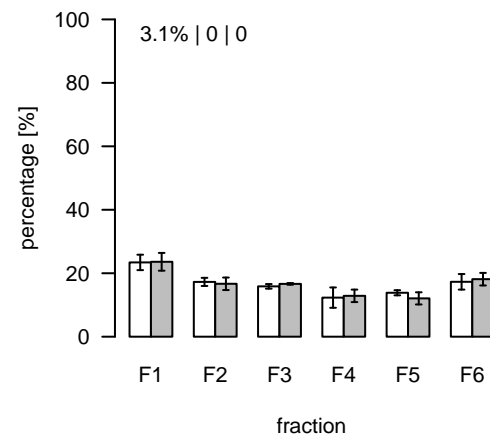

**S540 (m/z=708.446992; rt=13.57372)**  
T/S Cluster: S-13.6-1

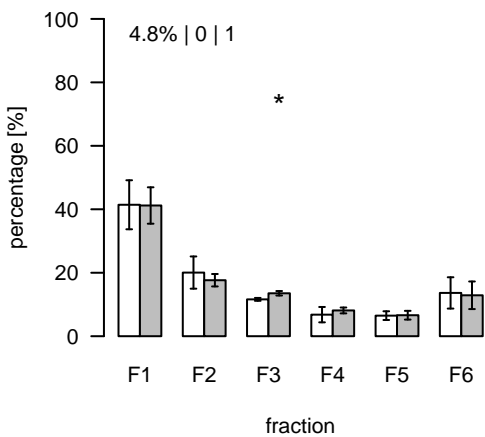

**S538 (m/z=289.216752; rt=13.56212)**  
T/S Cluster: S-13.6-2

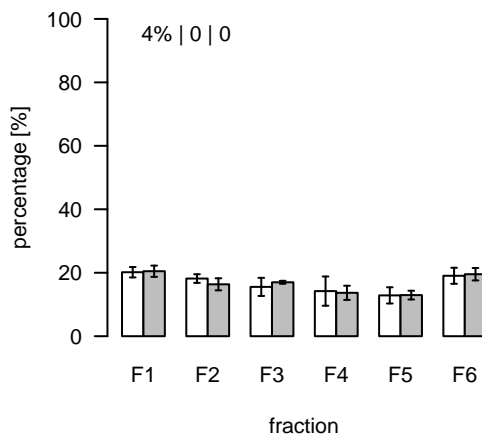

**S539 (m/z=307.22715; rt=13.56391)**  
T/S Cluster: S-13.6-3

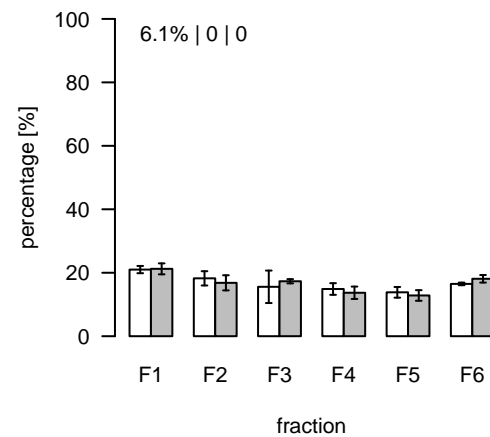

**S541 (m/z=429.167825; rt=13.60666)**  
T/S Cluster: S-13.6-4

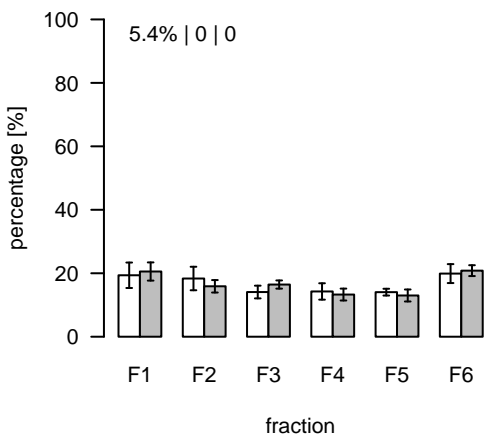

**S544 (m/z=288.247611; rt=13.6492)**  
T/S Cluster: S-13.6-5

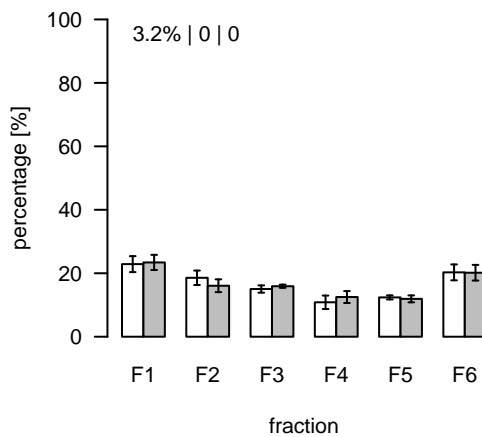

**S542 (m/z=365.230514; rt=13.61048)**  
T/S Cluster: S-13.6-5

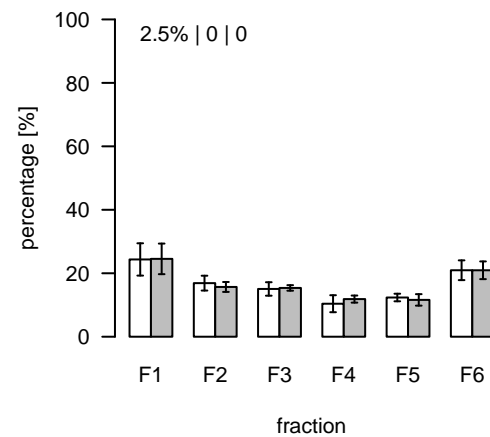

**S543 (m/z=597.483554; rt=13.64733)**  
T/S Cluster: S-13.6-6

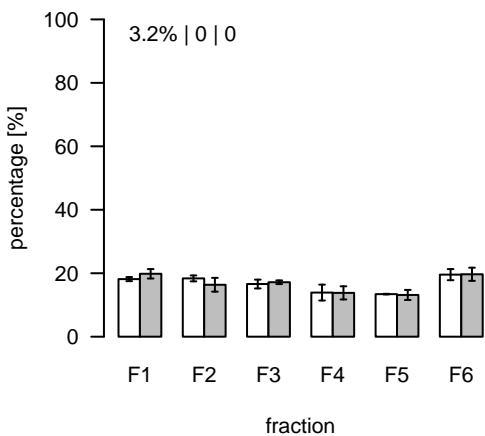

**S545 (m/z=288.253642; rt=13.65087)**  
T/S Cluster: S-13.7-1

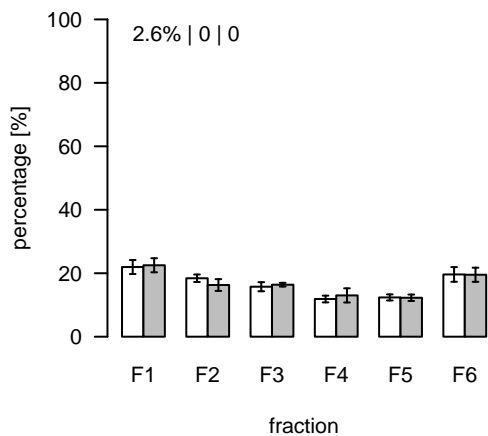

**S549 (m/z=399.211433; rt=13.70865)**  
T/S Cluster: S-13.7-1

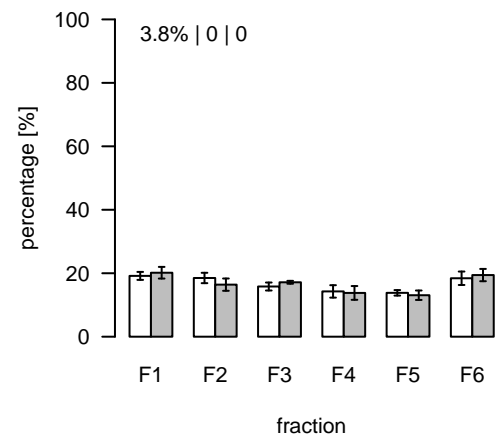

**S548 (m/z=399.204027; rt=13.70834)**  
T/S Cluster: S-13.7-1

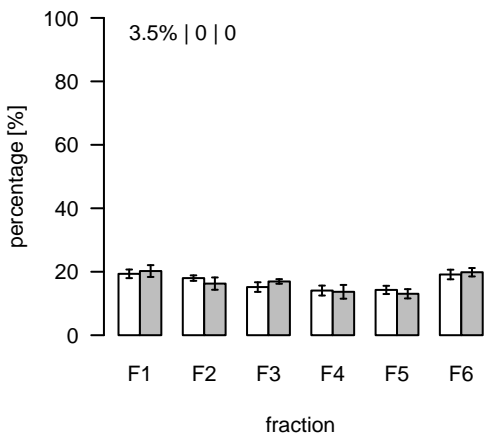

**S552 (m/z=323.219716; rt=13.72196)**  
T/S Cluster: S-13.7-1

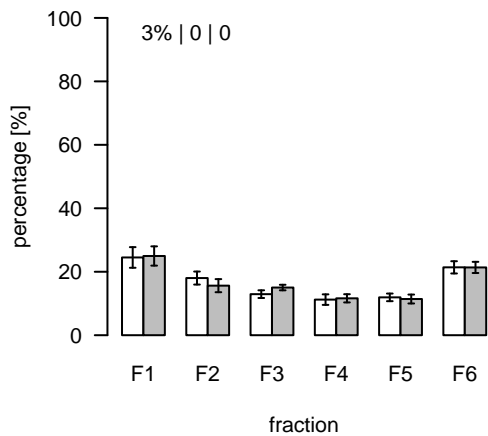

**S546 (m/z=310.23574; rt=13.65218)**  
T/S Cluster: S-13.7-2

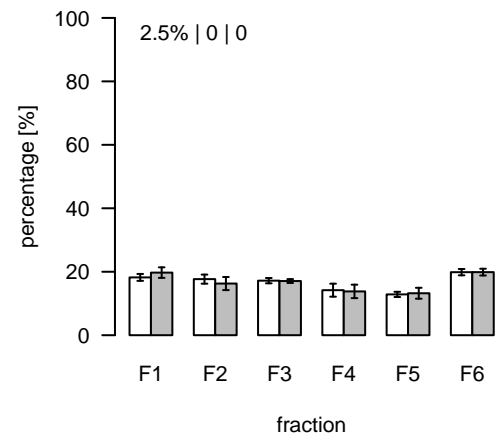

**S547 (m/z=310.235843; rt=13.6522)**  
T/S Cluster: S-13.7-2

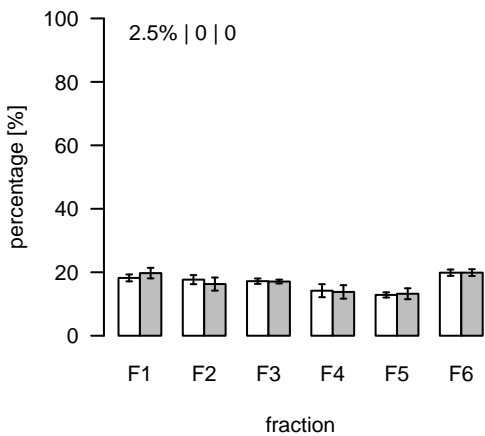

**S550 (m/z=823.770461; rt=13.71759)**  
T/S Cluster: S-13.7-3

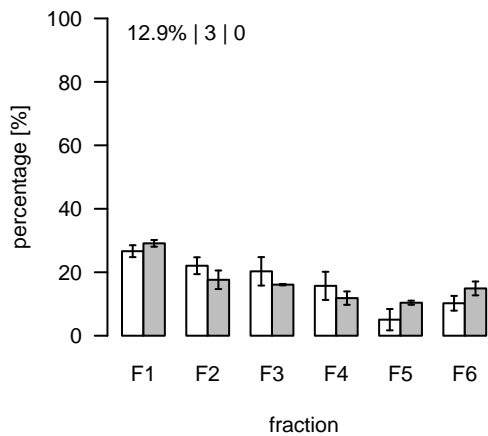

**S551 (m/z=706.432135; rt=13.72098)**  
T/S Cluster: S-13.7-4

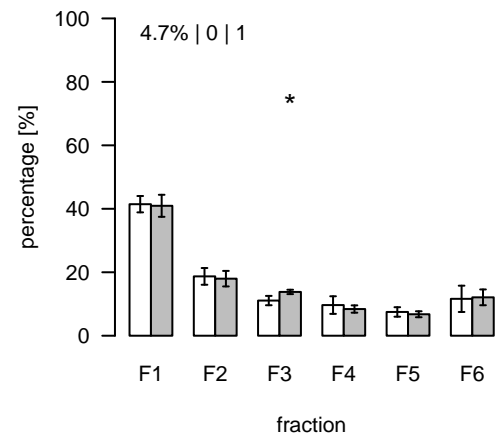

**S553 (m/z=291.153112; rt=13.73547)**  
T/S Cluster: S-13.7-5

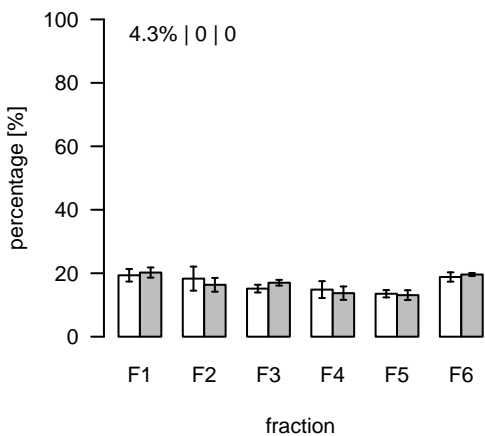

**S554 (m/z=437.738666; rt=13.89993)**  
T/S Cluster: S-13.9-1

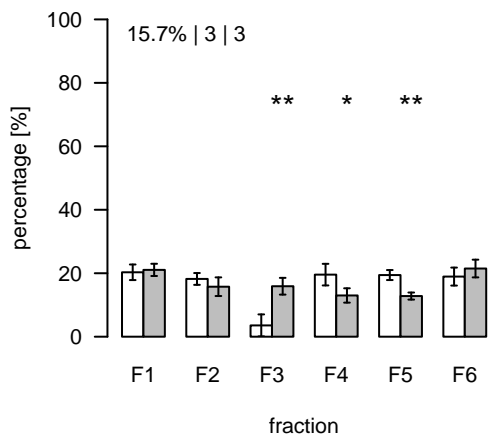

**S556 (m/z=245.110964; rt=13.95867)**  
T/S Cluster: S-14-1

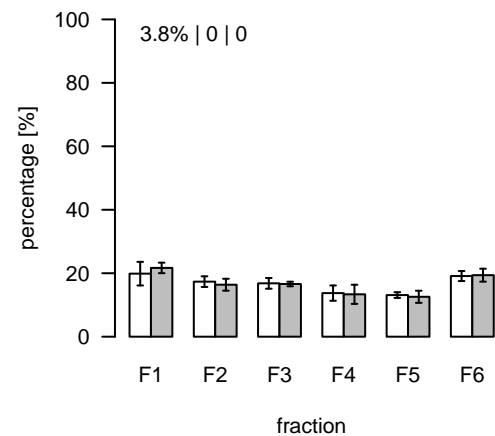

**S555 (m/z=245.107935; rt=13.95851)**  
T/S Cluster: S-14-1

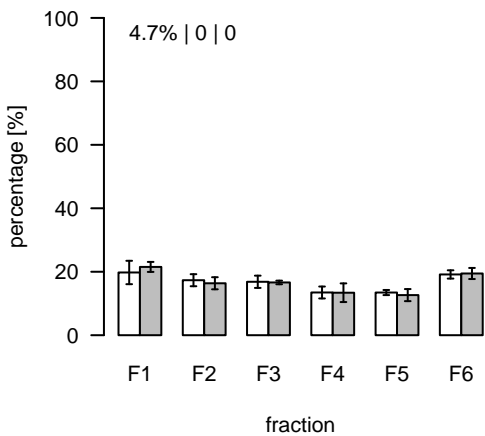

**S557 (m/z=487.263652; rt=13.98835)**  
T/S Cluster: S-14-2

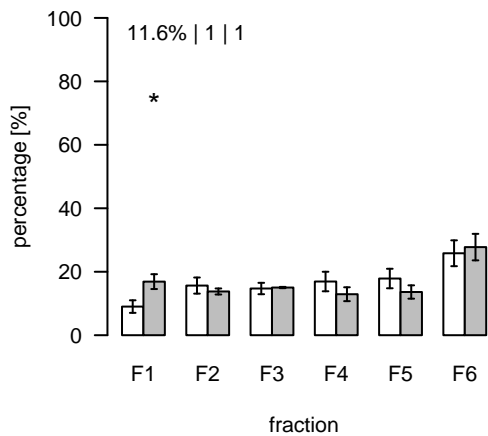

**S558 (m/z=823.602736; rt=13.99144)**  
T/S Cluster: S-14-3

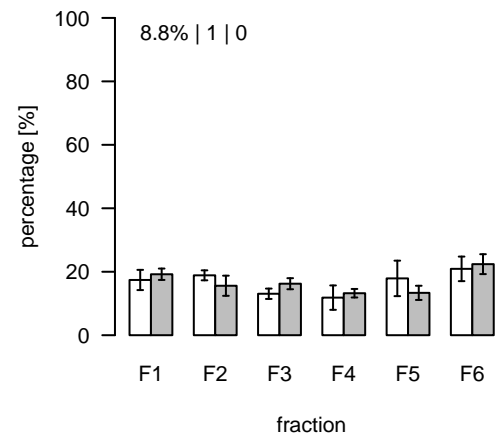

**S559 (m/z=864.498753; rt=14.05099)**  
T/S Cluster: S-14.1-1

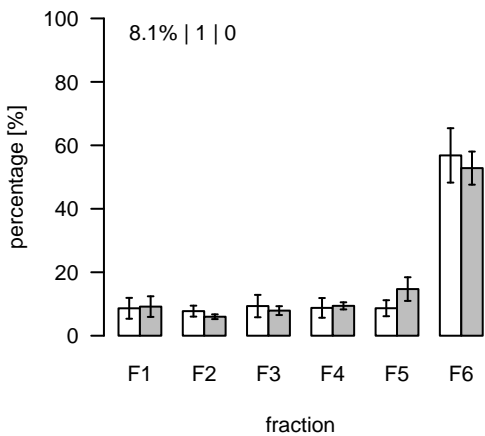

**S562 (m/z=305.168806; rt=14.09926)**  
T/S Cluster: S-14.1-2

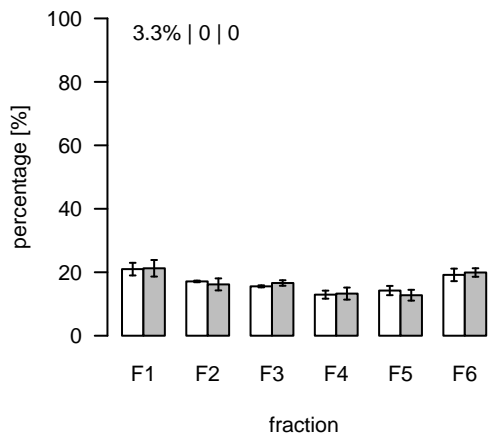

**S564 (m/z=309.243051; rt=14.11348)**  
T/S Cluster: S-14.1-2

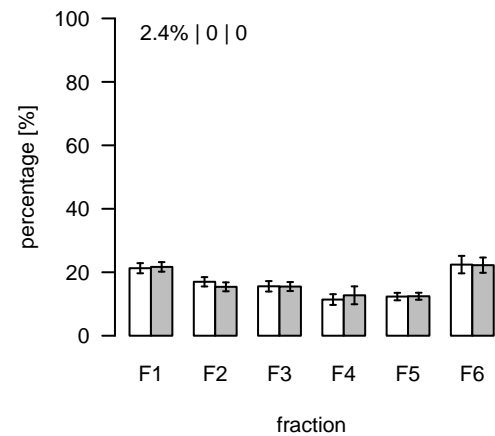

**S561 (m/z=305.163708; rt=14.09879)**  
T/S Cluster: S-14.1-2

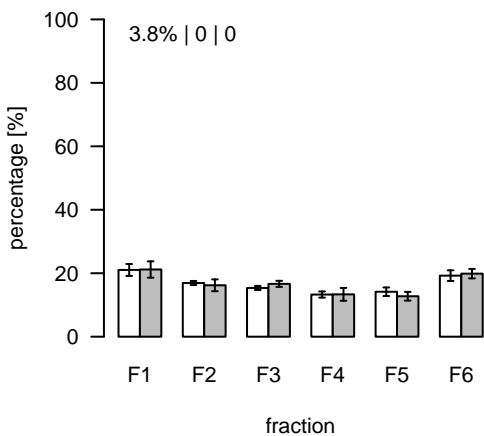

**S565 (m/z=349.235656; rt=14.11394)**  
T/S Cluster: S-14.1-2

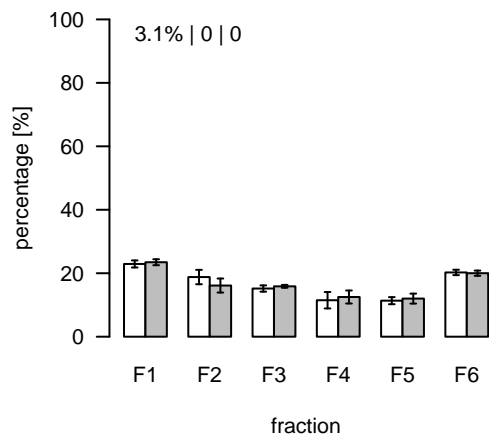

**S563 (m/z=309.237764; rt=14.11302)**  
T/S Cluster: S-14.1-2

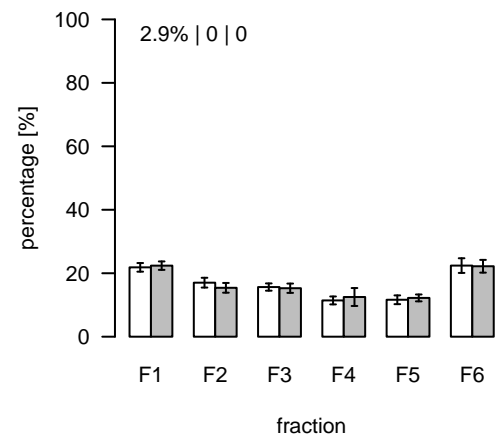

**S560 (m/z=688.421213; rt=14.09654)**  
T/S Cluster: S-14.1-2

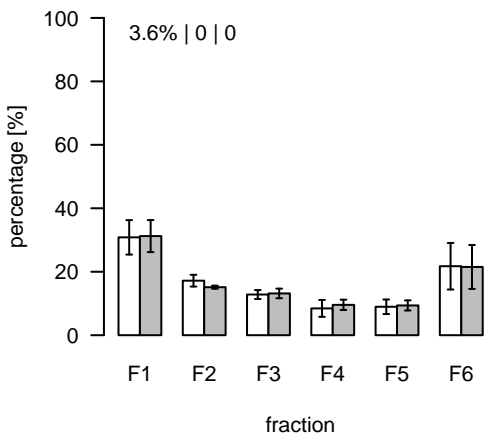

**S566 (m/z=1002.604683; rt=14.14891)**  
T/S Cluster: S-14.1-3

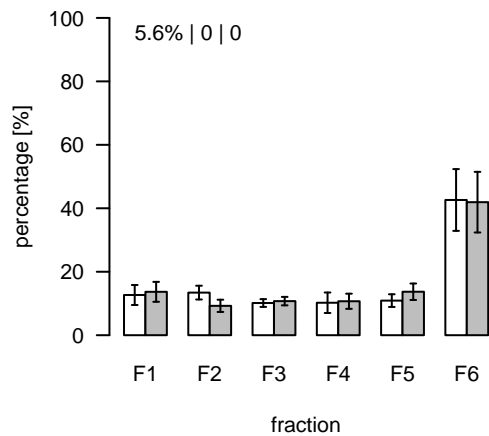

**S567 (m/z=823.478173; rt=14.21991)**  
T/S Cluster: S-14.2-1

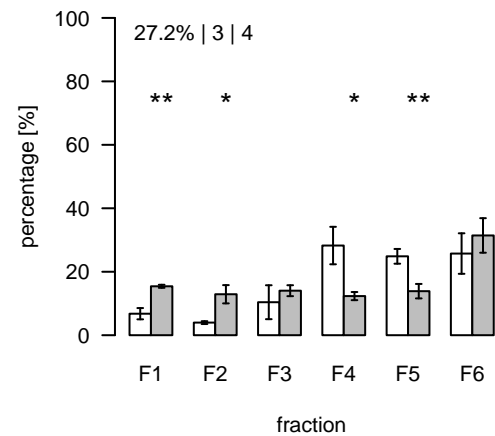

**S569 (m/z=221.153814; rt=14.23835)**  
T/S Cluster: S-14.2-2

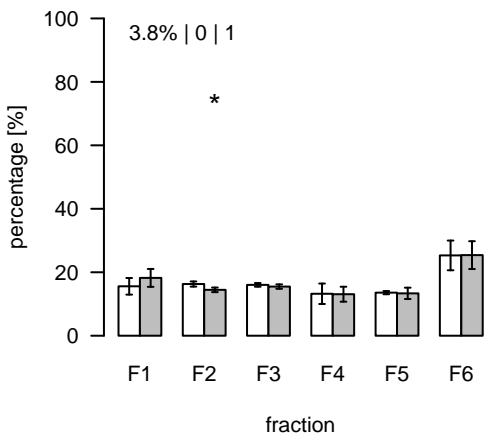

**S568 (m/z=221.152236; rt=14.23809)**  
T/S Cluster: S-14.2-2

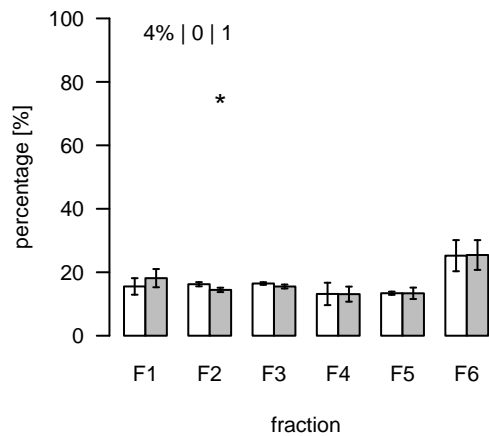

**S570 (m/z=345.204238; rt=14.23887)**  
T/S Cluster: S-14.2-3

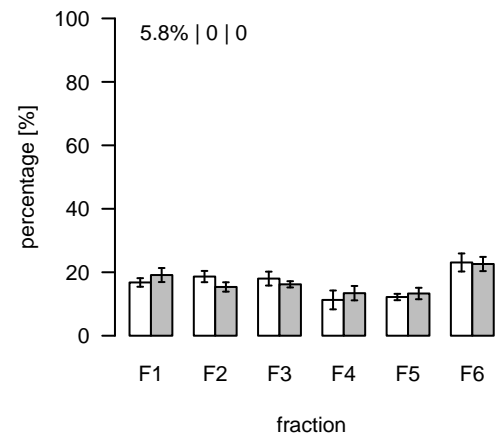

**S571 (m/z=323.220665; rt=14.23897)**  
T/S Cluster: S-14.2-3

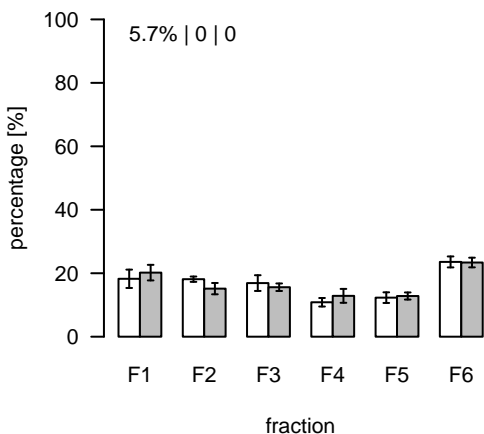

**S572 (m/z=323.223915; rt=14.239)**  
T/S Cluster: S-14.2-3

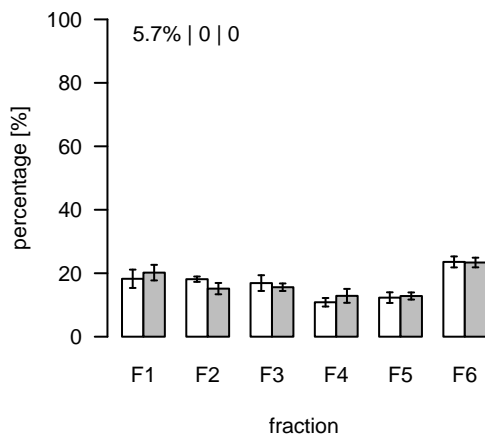

**S573 (m/z=760.427233; rt=14.30653)**  
T/S Cluster: S-14.3-1

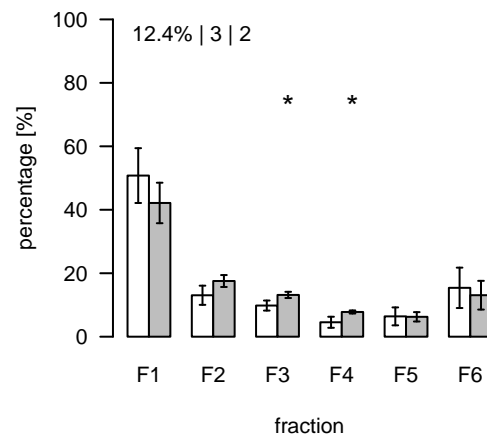

**S574 (m/z=480.219561; rt=14.31681)**  
T/S Cluster: S-14.3-2

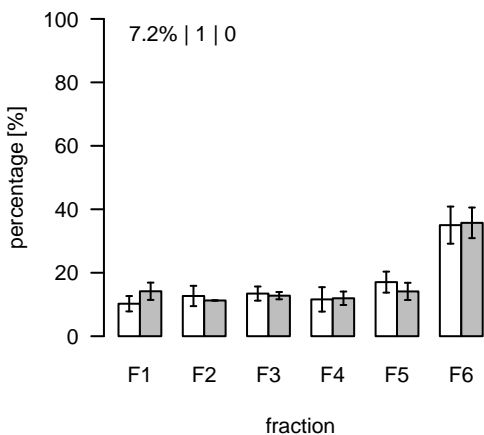

**S575 (m/z=458.237489; rt=14.31792)**  
T/S Cluster: S-14.3-3

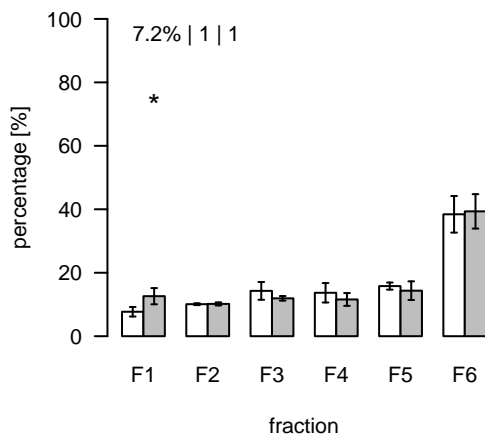

**S576 (m/z=670.395613; rt=14.34756)**  
T/S Cluster: S-14.3-4

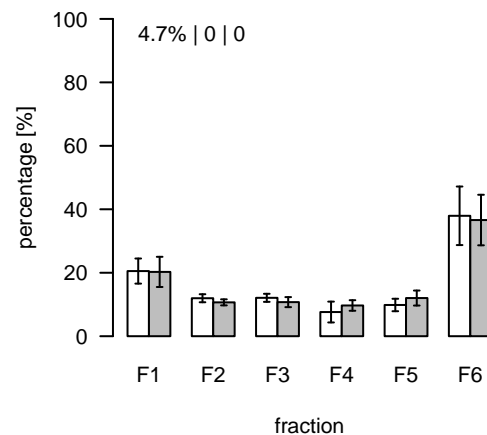

**S580 (m/z=481.353719; rt=14.34939)**  
T/S Cluster: S-14.3-4

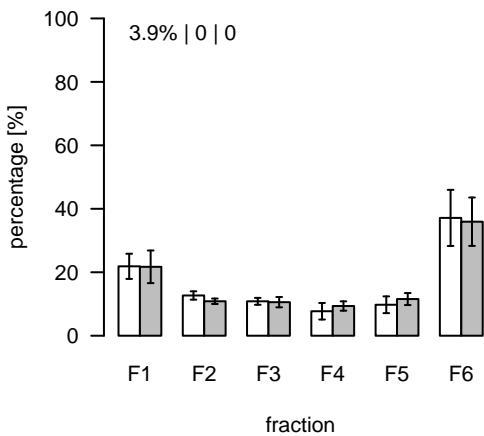

**S578 (m/z=653.368505; rt=14.34934)**  
T/S Cluster: S-14.3-4

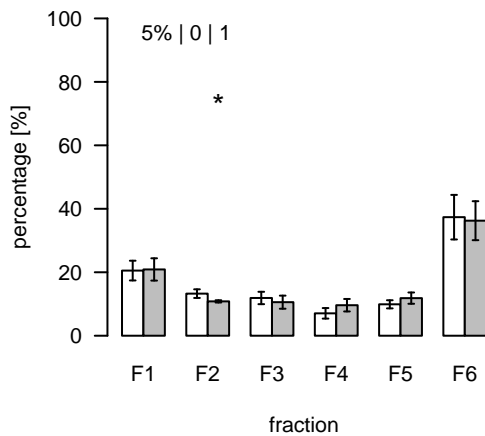

**S579 (m/z=653.368228; rt=14.34937)**  
T/S Cluster: S-14.3-4

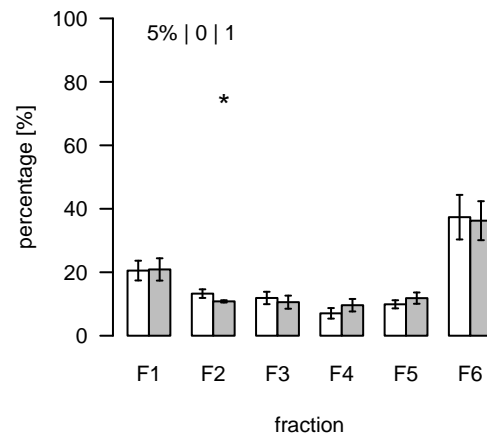

**S577 (m/z=671.398567; rt=14.34832)**  
T/S Cluster: S-14.3-4

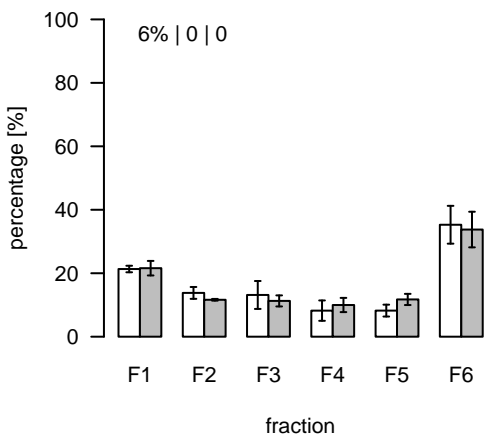

**S582 (m/z=744.4223; rt=14.38587)**  
T/S Cluster: S-14.4-1

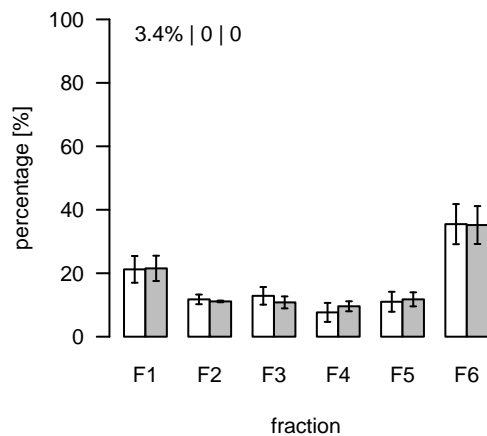

**S581 (m/z=745.425417; rt=14.38501)**  
T/S Cluster: S-14.4-1

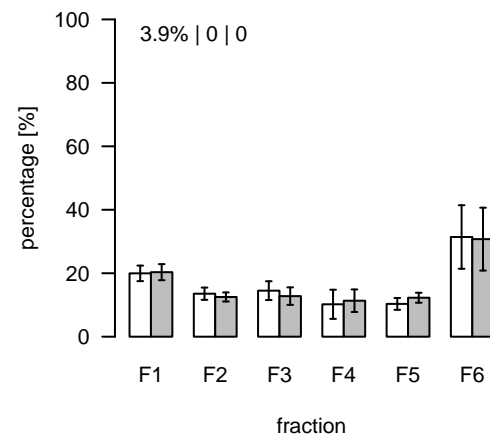

**S586 (m/z=690.436845; rt=14.41304)**  
T/S Cluster: S-14.4-2

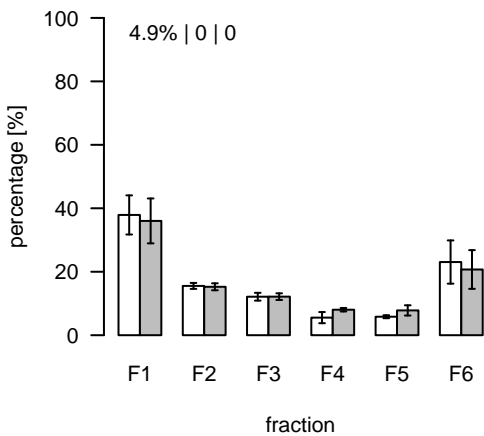

**S584 (m/z=496.341211; rt=14.38789)**  
T/S Cluster: S-14.4-2

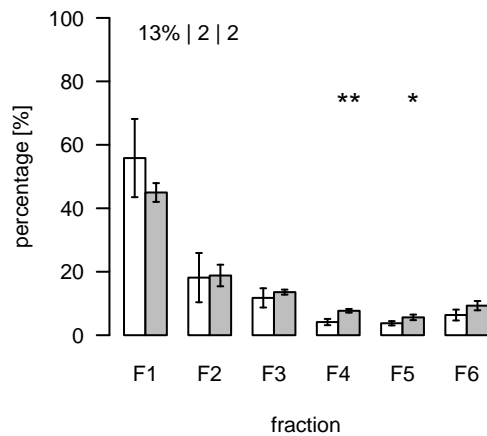

**S585 (m/z=496.341293; rt=14.38789)**  
T/S Cluster: S-14.4-2

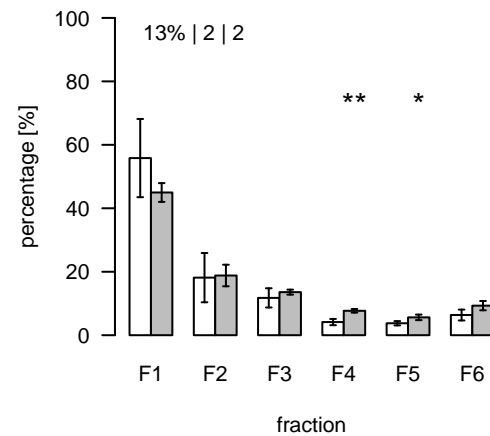

**S583 (m/z=496.322159; rt=14.38771)**  
T/S Cluster: S-14.4-2

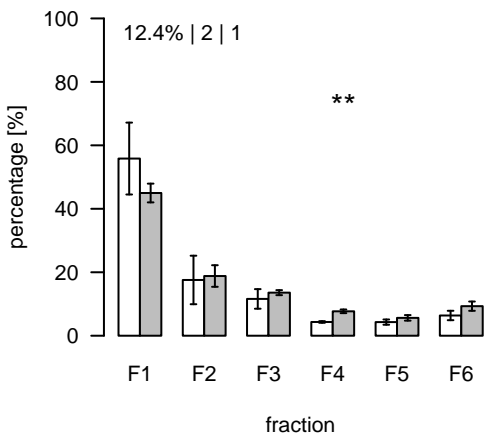

**S587 (m/z=808.500629; rt=14.45512)**  
T/S Cluster: S-14.5-1

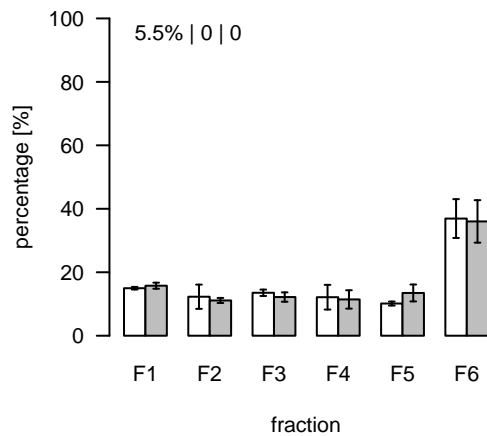

**S588 (m/z=319.184642; rt=14.45667)**  
T/S Cluster: S-14.5-2

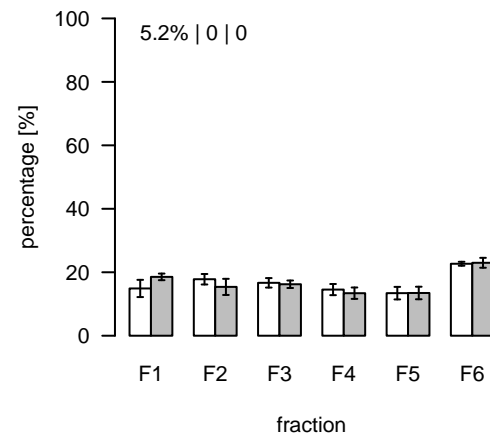



**S589 (m/z=319.184467; rt=14.45686)**  
T/S Cluster: S-14.5-2

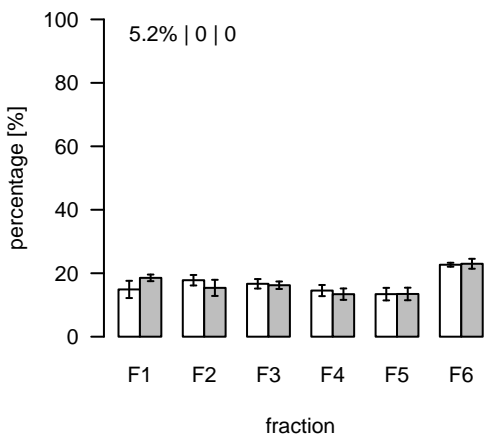

**S590 (m/z=437.801681; rt=14.45991)**  
T/S Cluster: S-14.5-3

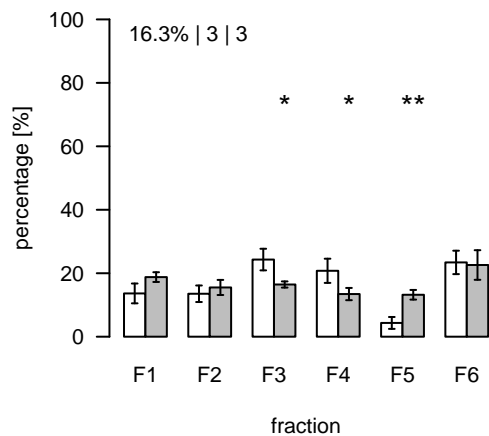

**S596 (m/z=690.437074; rt=14.51024)**  
T/S Cluster: S-14.5-4

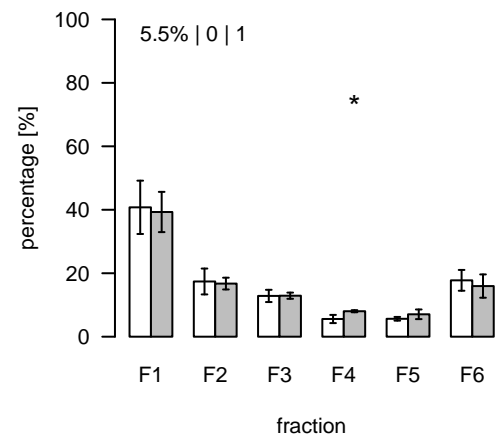

**S594 (m/z=740.473958; rt=14.47245)**  
T/S Cluster: S-14.5-4

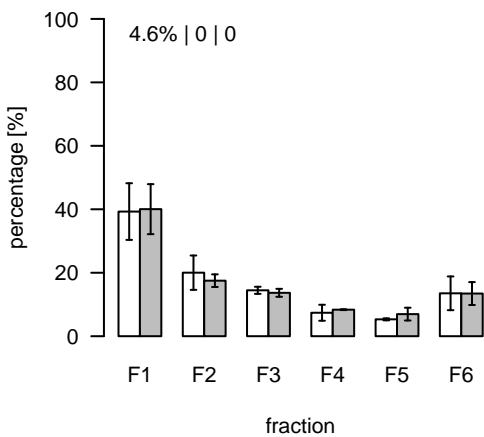

**S593 (m/z=740.447873; rt=14.47191)**  
T/S Cluster: S-14.5-4

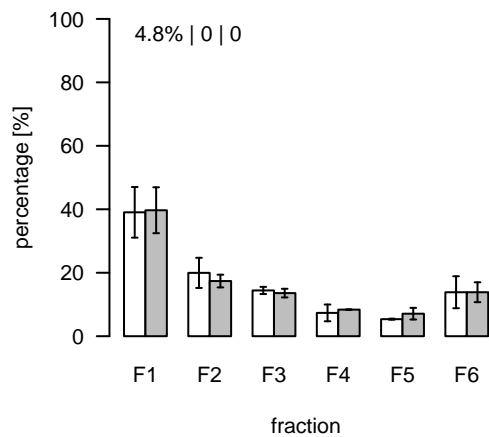

**S591 (m/z=741.477659; rt=14.47181)**  
T/S Cluster: S-14.5-4

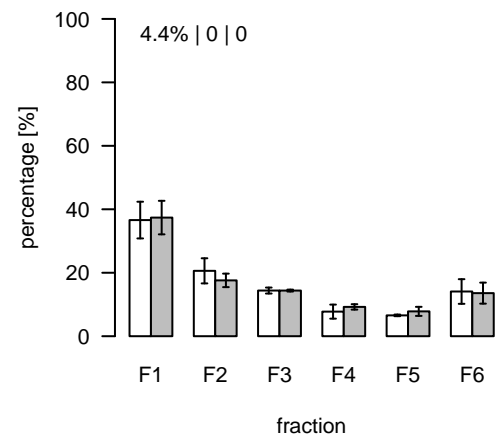

**S597 (m/z=691.43981; rt=14.51125)**  
T/S Cluster: S-14.5-4

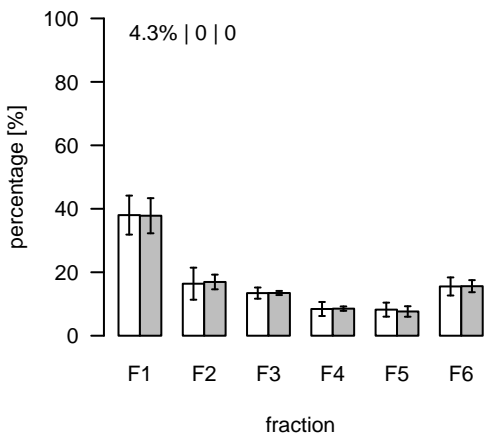

**S592 (m/z=437.773635; rt=14.47186)**  
T/S Cluster: S-14.5-5

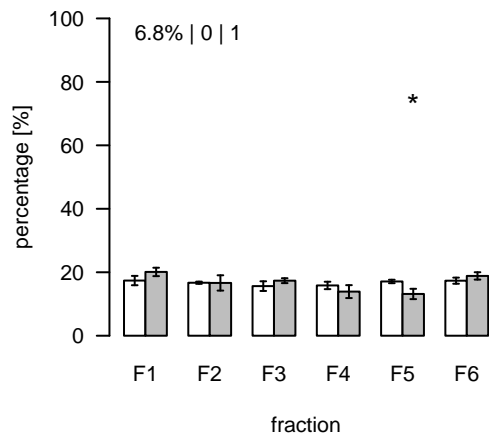

**S595 (m/z=848.50231; rt=14.49453)**  
T/S Cluster: S-14.5-6

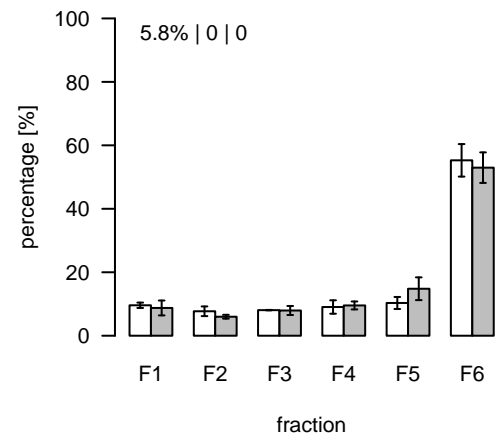

**S599 (m/z=655.384721; rt=14.51391)**  
T/S Cluster: S-14.5-7

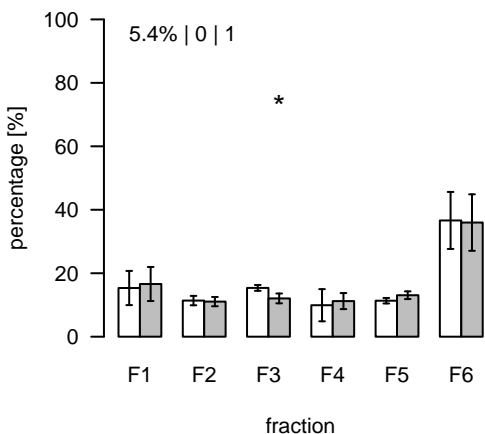

**S598 (m/z=655.384625; rt=14.5117)**  
T/S Cluster: S-14.5-7

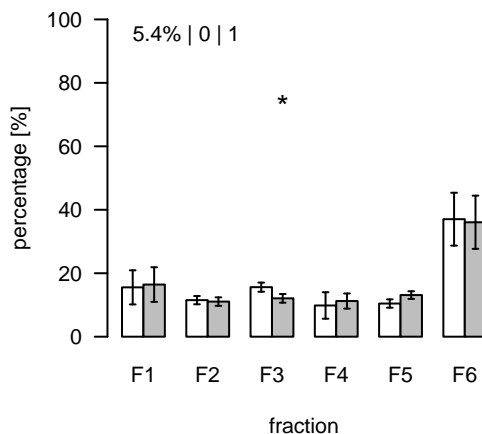

**S600 (m/z=848.543625; rt=14.51931)**  
T/S Cluster: S-14.5-8

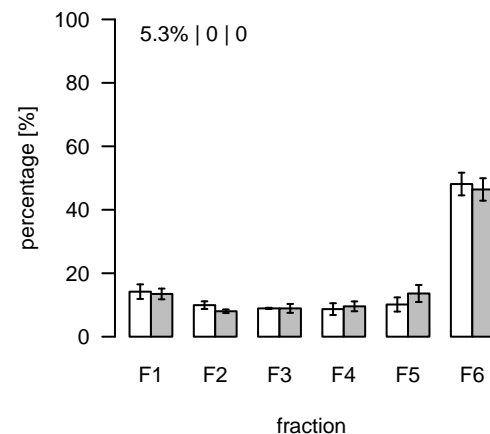

**S602 (m/z=672.410552; rt=14.54037)**  
T/S Cluster: S-14.5-9

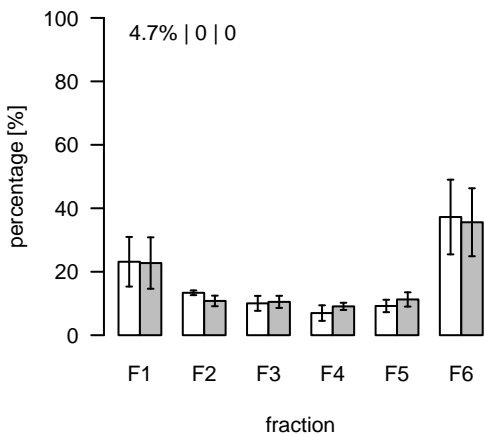

**S601 (m/z=483.369204; rt=14.5307)**  
T/S Cluster: S-14.5-9

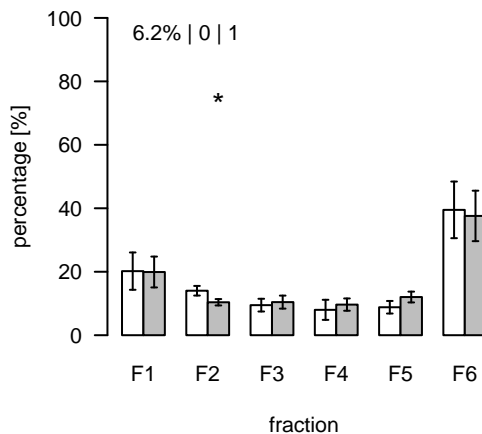

**S604 (m/z=722.462602; rt=14.60905)**  
T/S Cluster: S-14.6-1

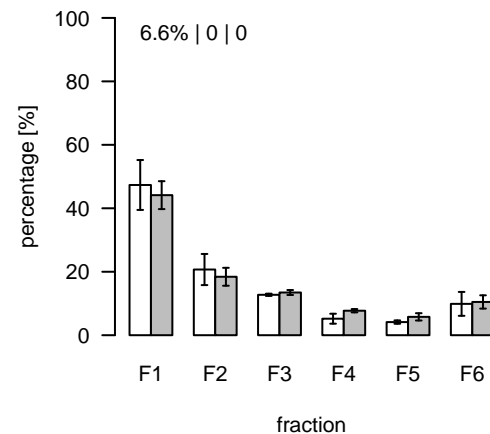

**S605 (m/z=723.467322; rt=14.60955)**  
T/S Cluster: S-14.6-1

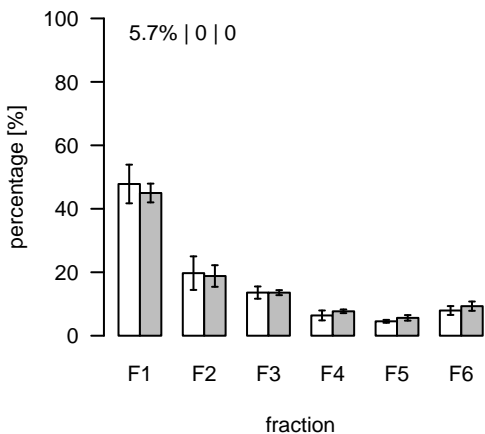

**S607 (m/z=822.553074; rt=14.63054)**  
T/S Cluster: S-14.6-1

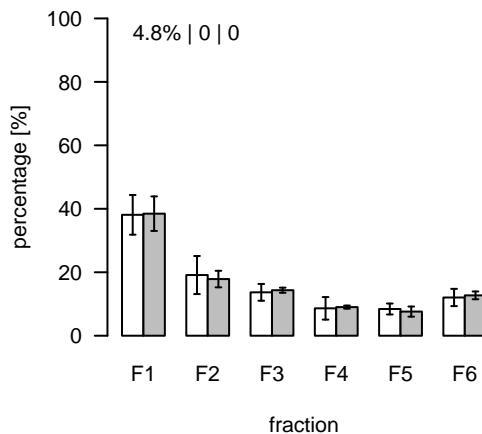

**S606 (m/z=724.476682; rt=14.62456)**  
T/S Cluster: S-14.6-1

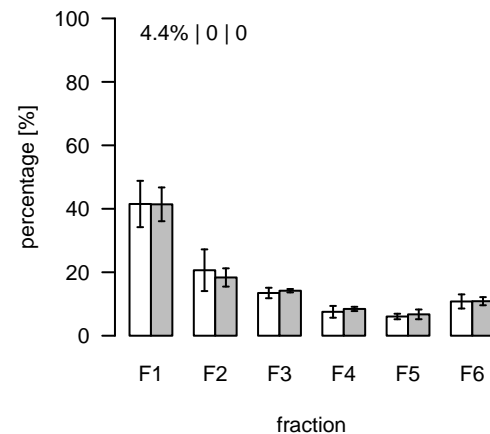

**S603 (m/z=778.489647; rt=14.59585)**  
T/S Cluster: S-14.6-1

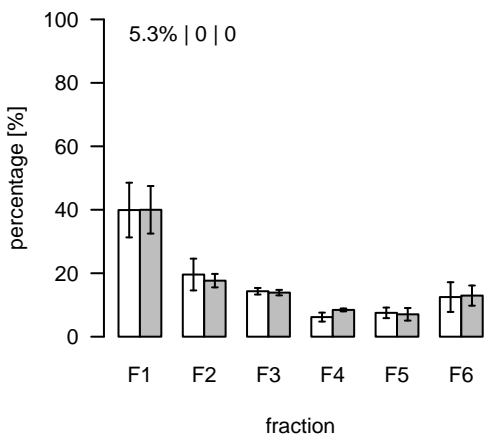

**S608 (m/z=823.562094; rt=14.63676)**  
T/S Cluster: S-14.6-2

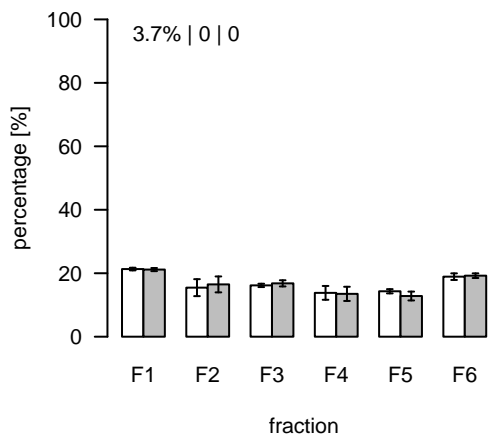

**S616 (m/z=744.431314; rt=14.71736)**  
T/S Cluster: S-14.7-1

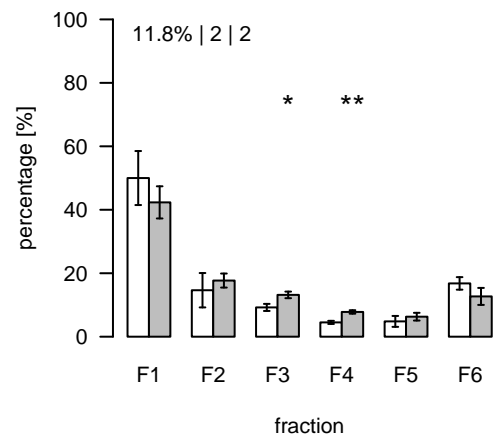

**S609 (m/z=655.38624; rt=14.65472)**  
T/S Cluster: S-14.7-1

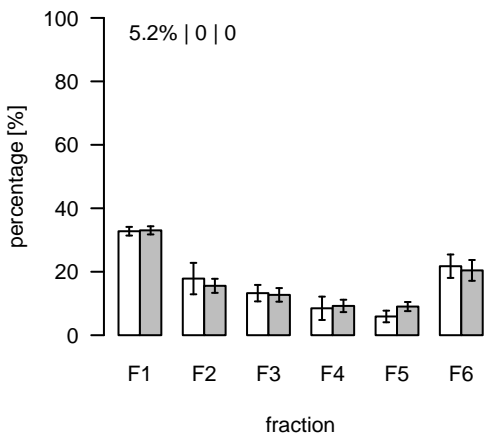

**S611 (m/z=810.516257; rt=14.66175)**  
T/S Cluster: S-14.7-2

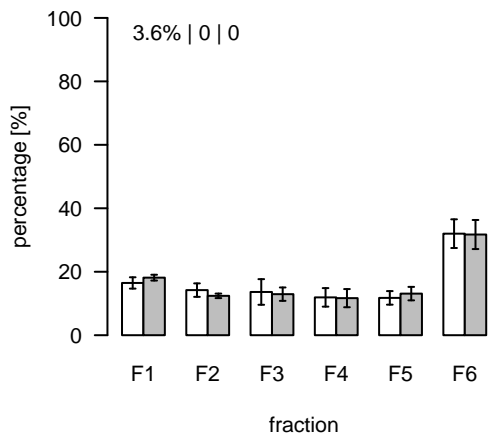

**S610 (m/z=810.515164; rt=14.6549)**  
T/S Cluster: S-14.7-2

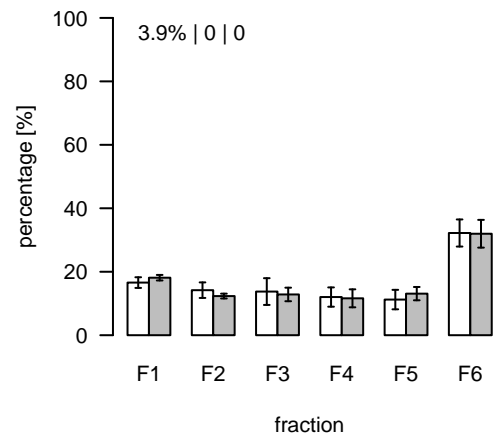

**S612 (m/z=738.457985; rt=14.66602)**  
T/S Cluster: S-14.7-3

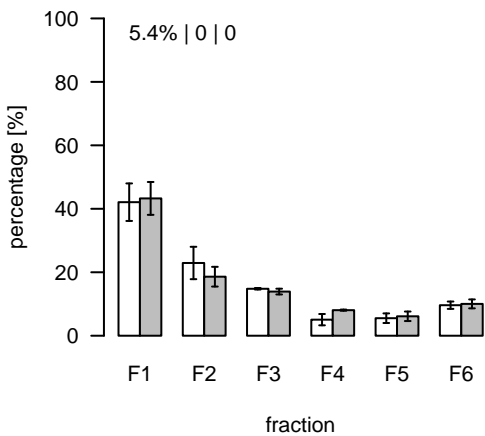

**S613 (m/z=852.525923; rt=14.68162)**  
T/S Cluster: S-14.7-3

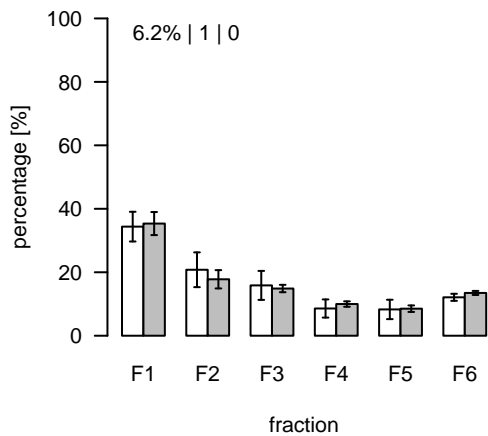

**S614 (m/z=842.513989; rt=14.68184)**  
T/S Cluster: S-14.7-4

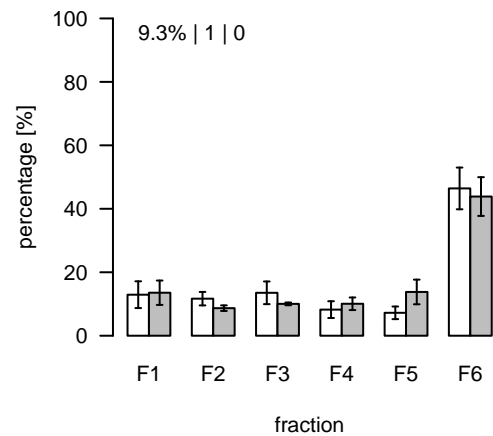

**S615 (m/z=843.517074; rt=14.68378)**  
T/S Cluster: S-14.7-4

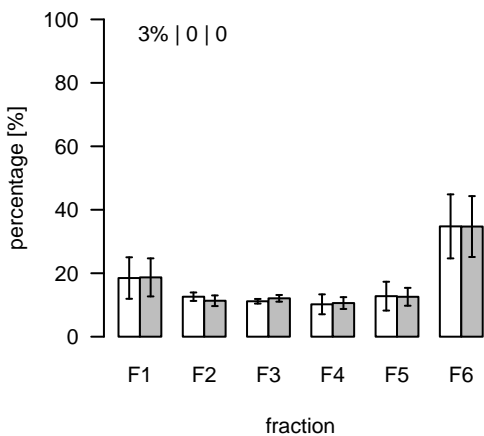

**S617 (m/z=300.992893; rt=14.76514)**  
T/S Cluster: S-14.8-1

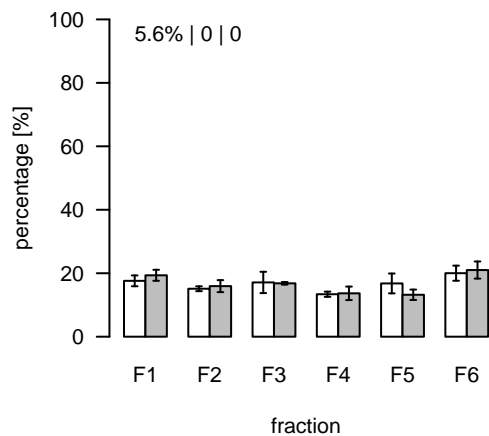

**S629 (m/z=720.447285; rt=14.7837)**  
T/S Cluster: S-14.8-2

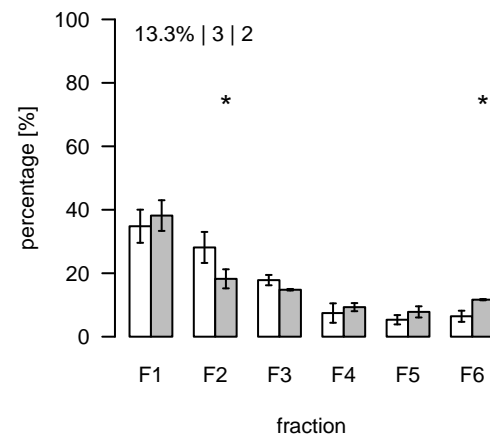

**S625 (m/z=652.420768; rt=14.77929)**  
T/S Cluster: S-14.8-2

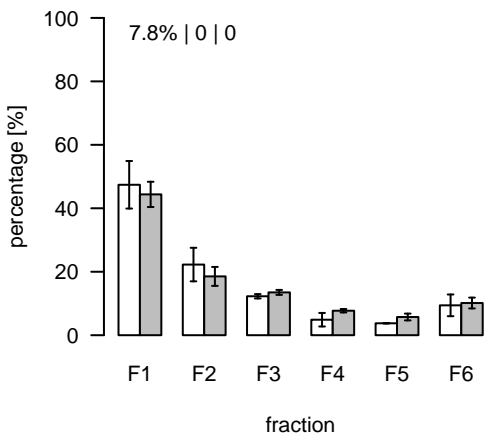

**S627 (m/z=652.421052; rt=14.77975)**  
T/S Cluster: S-14.8-2

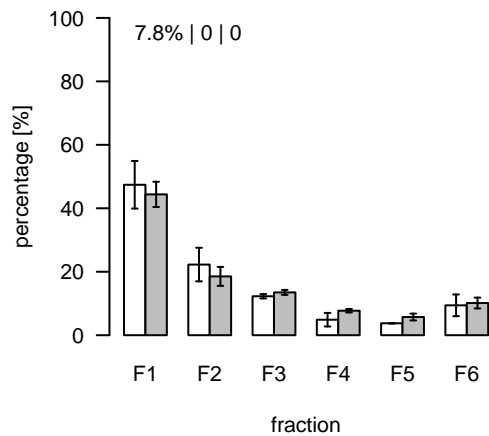

**S633 (m/z=722.463524; rt=14.83232)**  
T/S Cluster: S-14.8-2

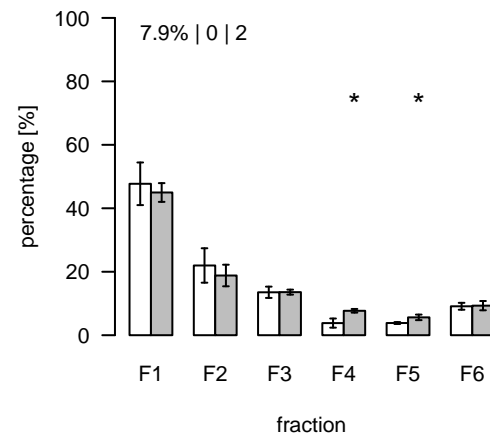

**S634 (m/z=723.466179; rt=14.8353)**  
T/S Cluster: S-14.8-2

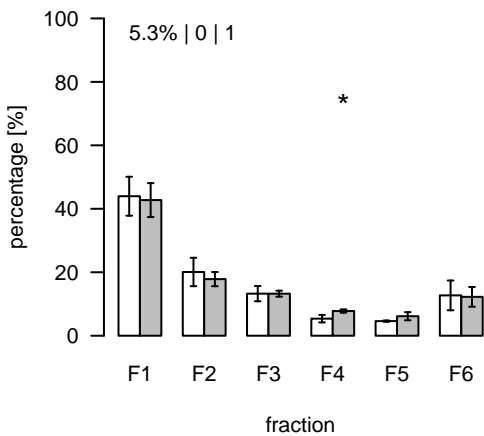

**S618 (m/z=748.47726; rt=14.77287)**  
T/S Cluster: S-14.8-2

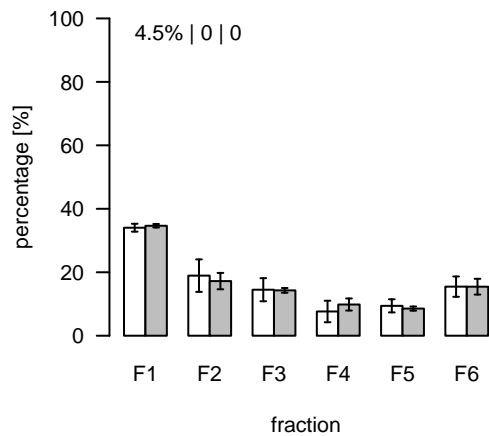

**S628 (m/z=721.450793; rt=14.78257)**  
T/S Cluster: S-14.8-2

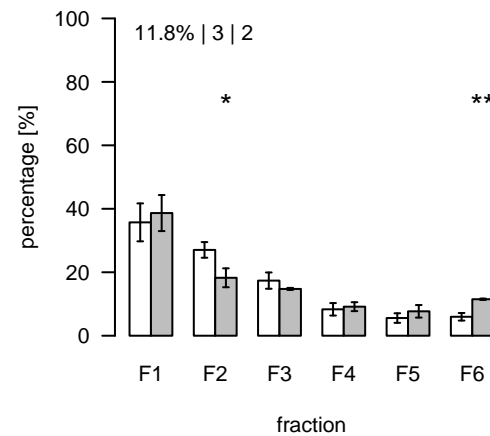

**S626 (m/z=653.424876; rt=14.77945)**  
T/S Cluster: S-14.8-2

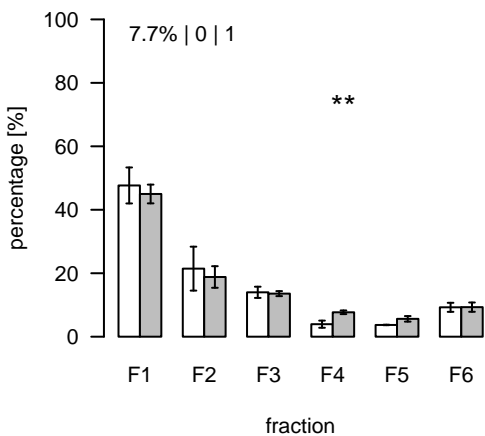

**S635 (m/z=746.463658; rt=14.83897)**  
T/S Cluster: S-14.8-2

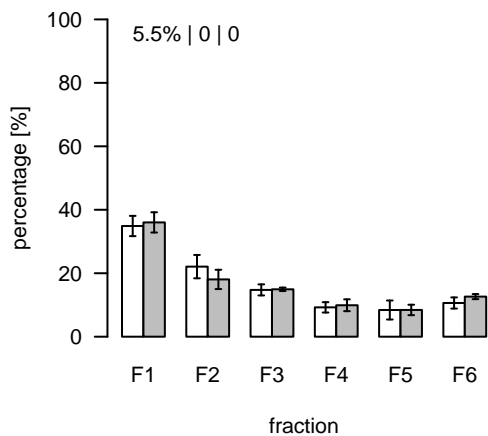

**S619 (m/z=654.401898; rt=14.77461)**  
T/S Cluster: S-14.8-3

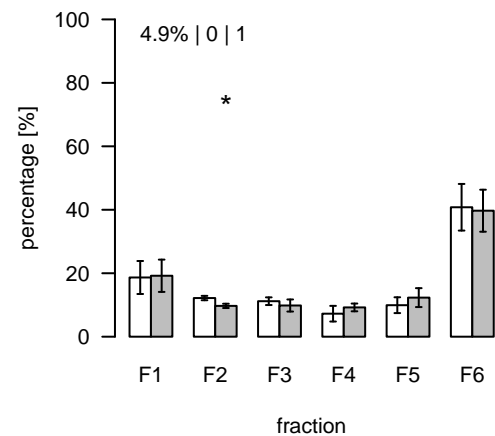

**S621 (m/z=465.358735; rt=14.77567)**  
T/S Cluster: S-14.8-3

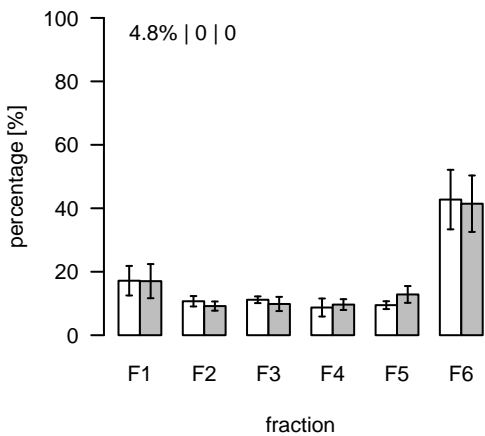

**S623 (m/z=619.362646; rt=14.77761)**  
T/S Cluster: S-14.8-3

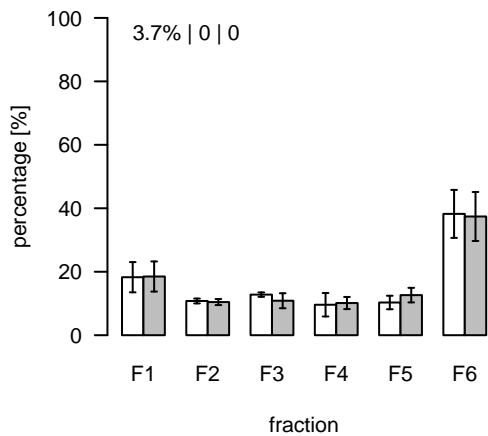

**S620 (m/z=465.347529; rt=14.77506)**  
T/S Cluster: S-14.8-3

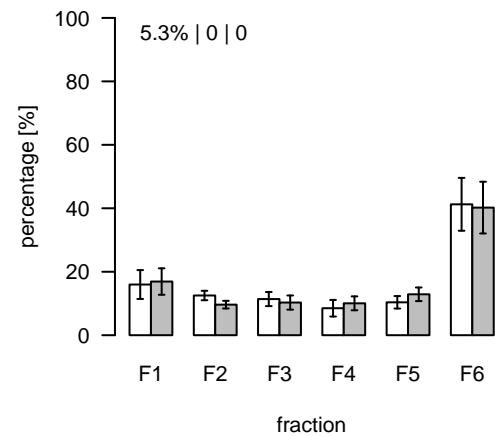

**S622 (m/z=654.428798; rt=14.77677)**  
T/S Cluster: S-14.8-4

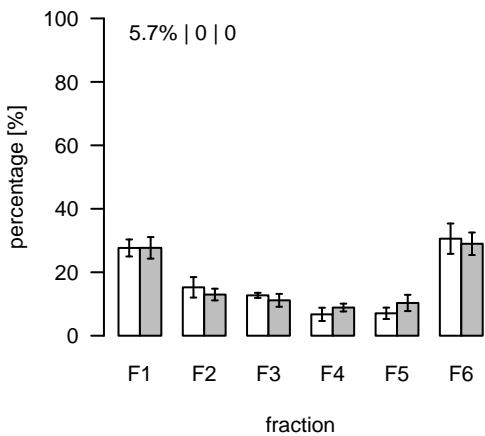

**S624 (m/z=437.749891; rt=14.77824)**  
T/S Cluster: S-14.8-5

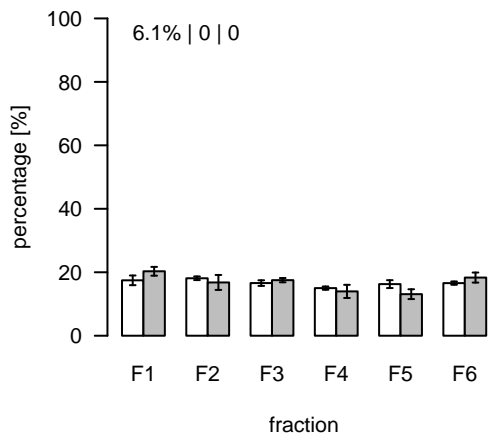

**S630 (m/z=437.795513; rt=14.78491)**  
T/S Cluster: S-14.8-6

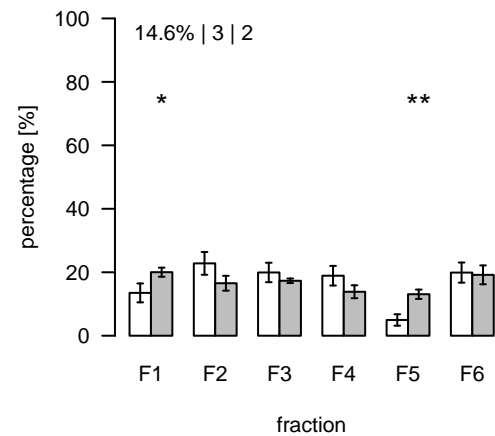

**S631 (m/z=842.514734; rt=14.81336)**  
T/S Cluster: S-14.8-7

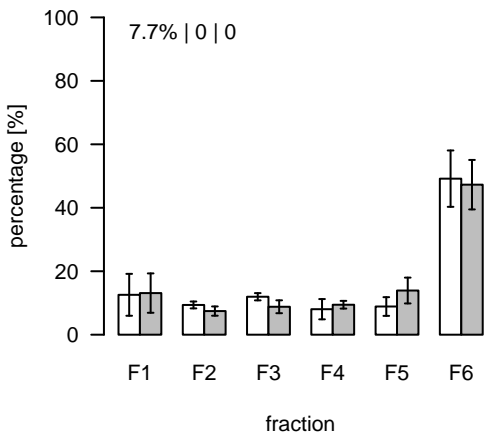

**S632 (m/z=843.517811; rt=14.8138)**  
T/S Cluster: S-14.8-8

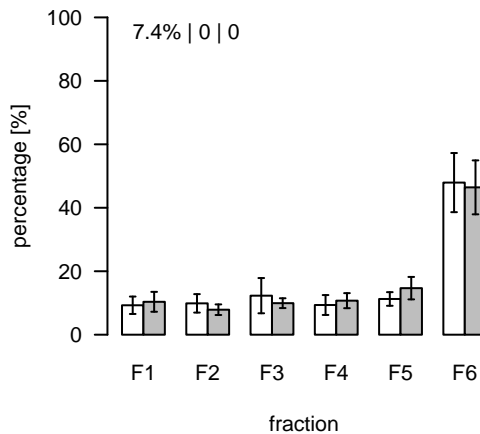

**S636 (m/z=728.427707; rt=14.85118)**  
T/S Cluster: S-14.9-1

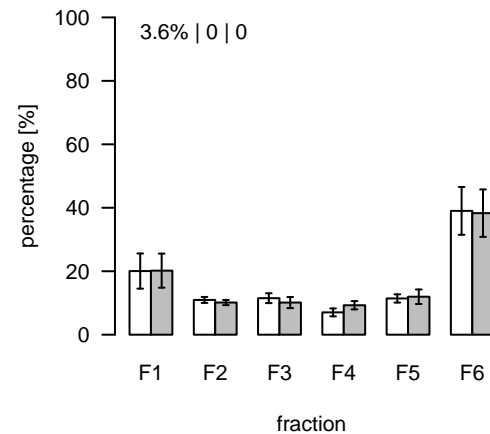

**S637 (m/z=729.430537; rt=14.85201)**  
T/S Cluster: S-14.9-1

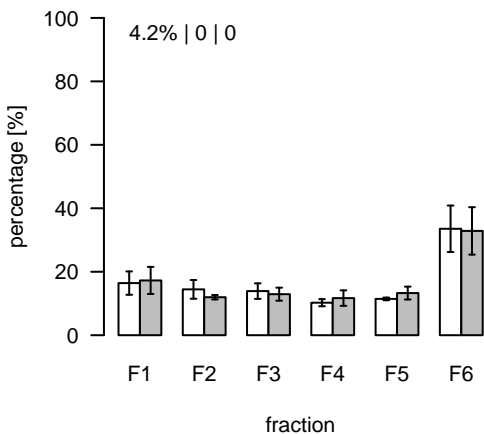

**S657 (m/z=666.436273; rt=14.90628)**  
T/S Cluster: S-14.9-2

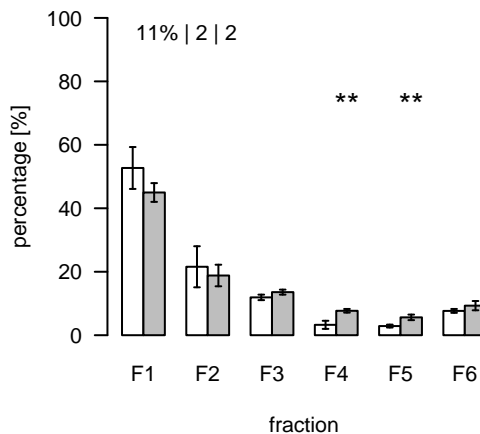

**S654 (m/z=667.440149; rt=14.90601)**  
T/S Cluster: S-14.9-2

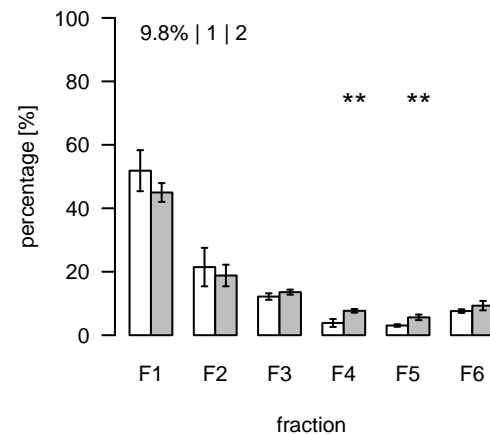

**S642 (m/z=692.451979; rt=14.87952)**  
T/S Cluster: S-14.9-2

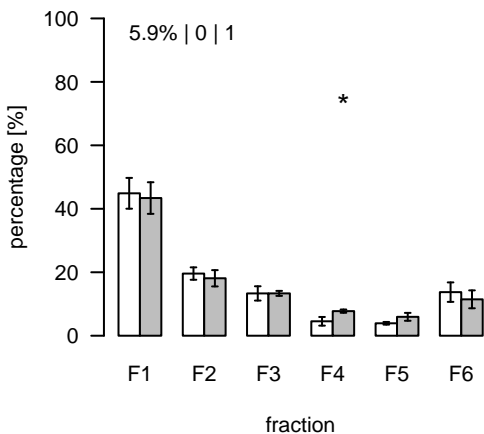

**S656 (m/z=333.219276; rt=14.90627)**  
T/S Cluster: S-14.9-2

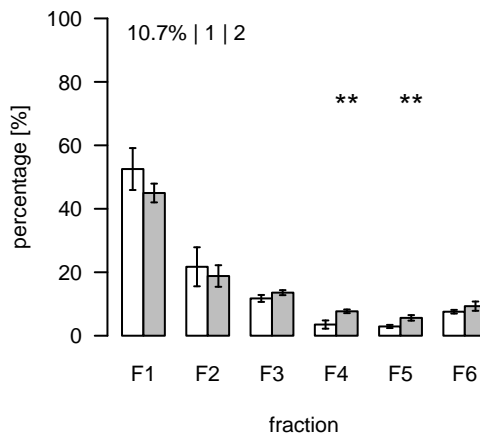

**S655 (m/z=668.442703; rt=14.90601)**  
T/S Cluster: S-14.9-2

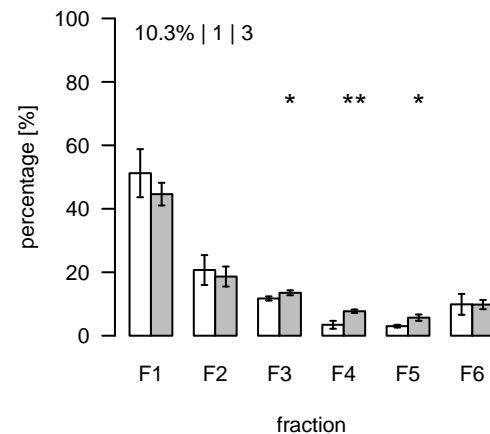

**S649 (m/z=688.41805; rt=14.90257)**  
T/S Cluster: S-14.9-2

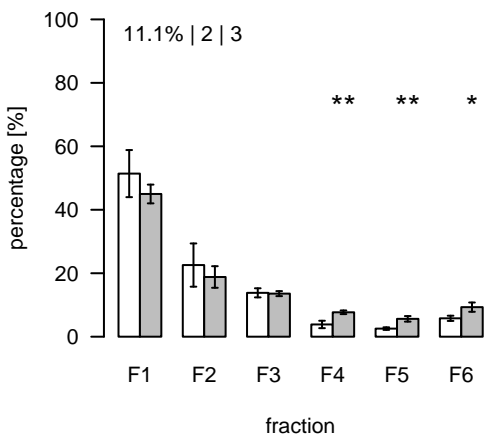

**S646 (m/z=624.389597; rt=14.88801)**  
T/S Cluster: S-14.9-2

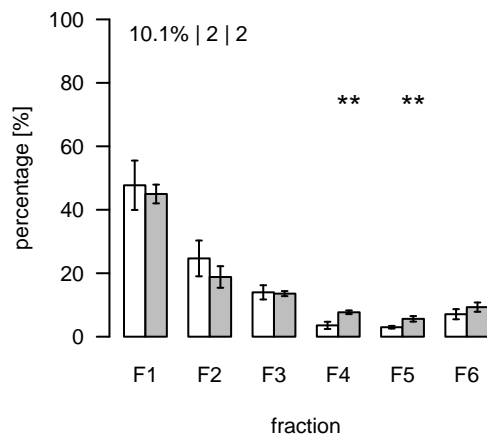

**S644 (m/z=680.451564; rt=14.88493)**  
T/S Cluster: S-14.9-2

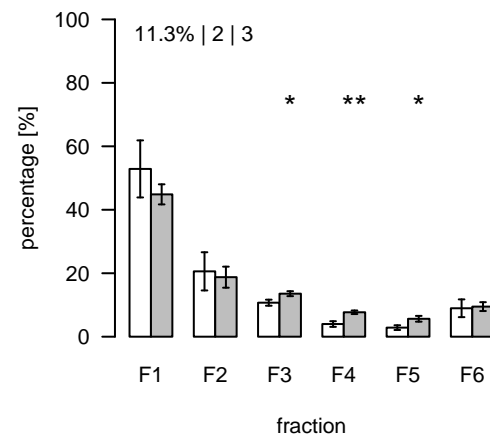

**S663 (m/z=638.442006; rt=14.91791)**  
T/S Cluster: S-14.9-2

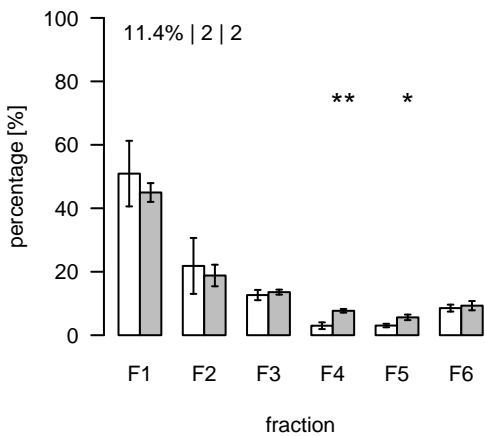

**S664 (m/z=693.455794; rt=14.92102)**  
T/S Cluster: S-14.9-2

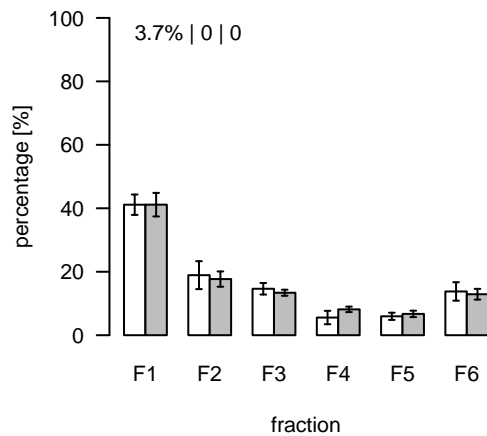

**S653 (m/z=333.721009; rt=14.90592)**  
T/S Cluster: S-14.9-2

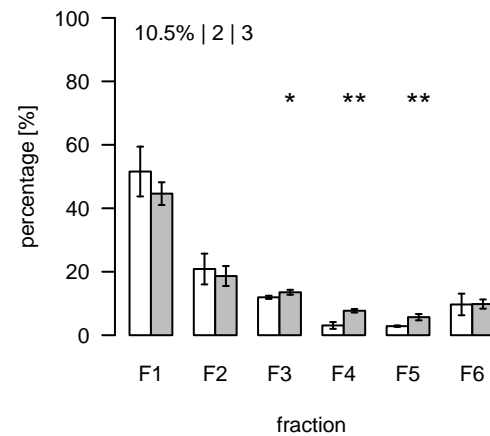

**S640 (m/z=624.412634; rt=14.87327)**  
T/S Cluster: S-14.9-2

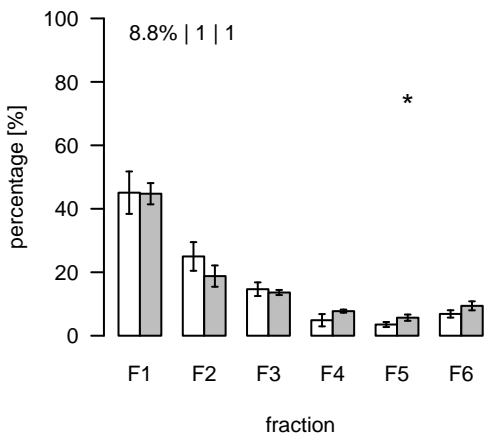

**S647 (m/z=624.369921; rt=14.88812)**  
T/S Cluster: S-14.9-2

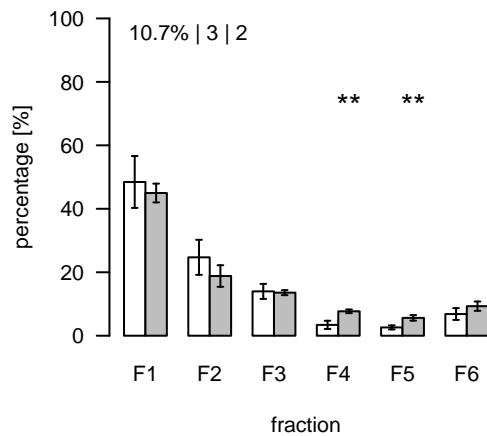

**S658 (m/z=820.538605; rt=14.90901)**  
T/S Cluster: S-14.9-2

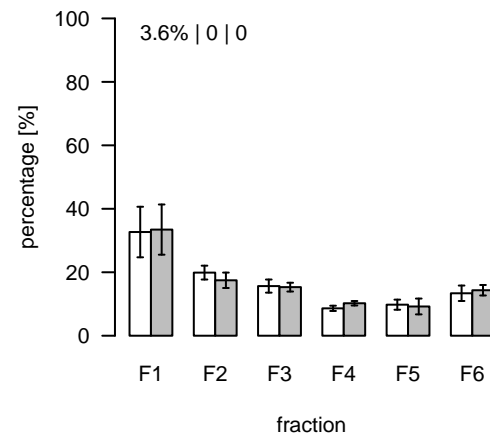

**S652 (m/z=222.148293; rt=14.90551)**  
T/S Cluster: S-14.9-2

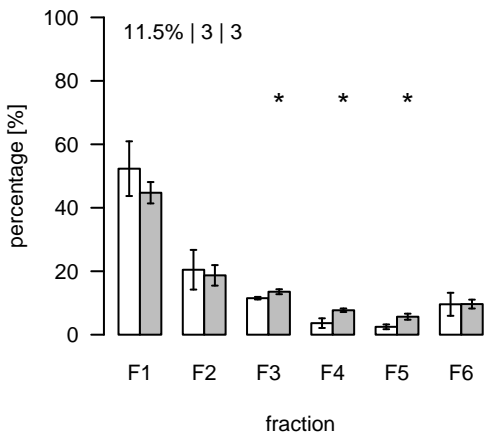

**S650 (m/z=678.435677; rt=14.90405)**  
T/S Cluster: S-14.9-2

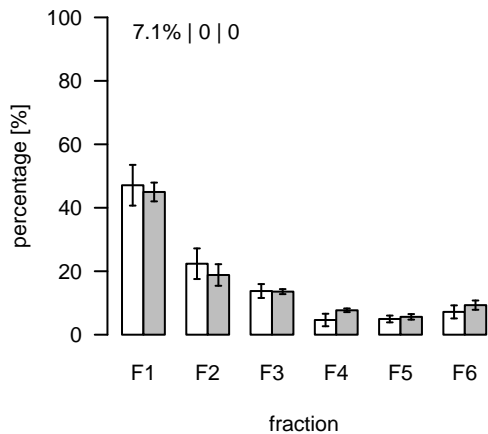

**S639 (m/z=678.46747; rt=14.86874)**  
T/S Cluster: S-14.9-2

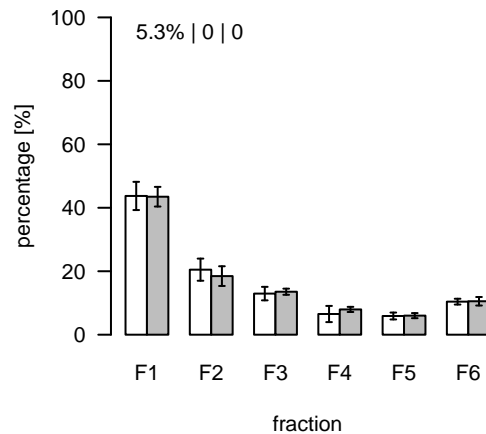

**S659 (m/z=678.408826; rt=14.90934)**  
T/S Cluster: S-14.9-2

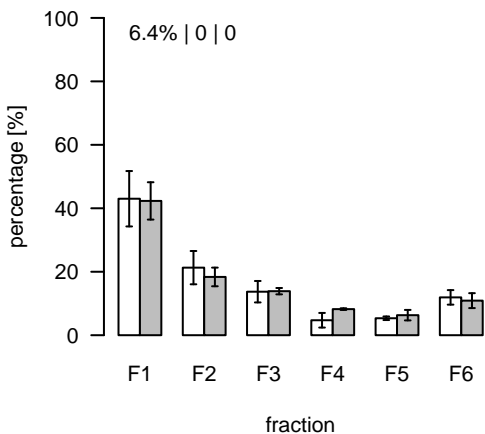

**S641 (m/z=652.421196; rt=14.87387)**  
T/S Cluster: S-14.9-2

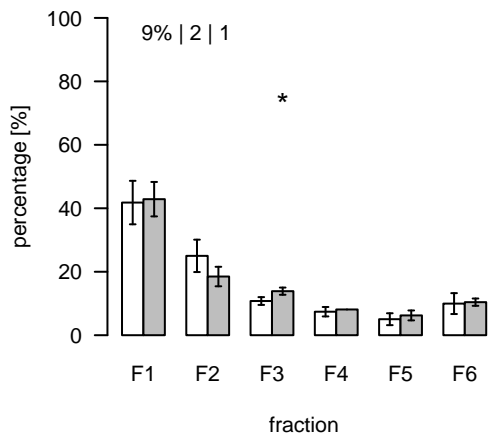

**S638 (m/z=680.451106; rt=14.86026)**  
T/S Cluster: S-14.9-2

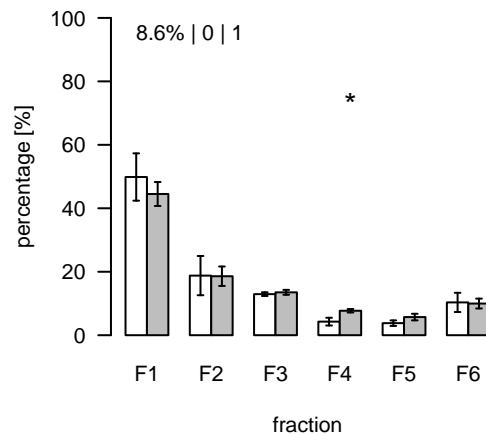

**S651 (m/z=184.073441; rt=14.90541)**  
T/S Cluster: S-14.9-2

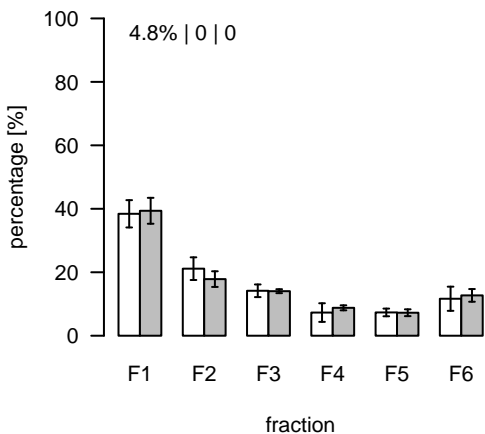

**S662 (m/z=639.445498; rt=14.91724)**  
T/S Cluster: S-14.9-2

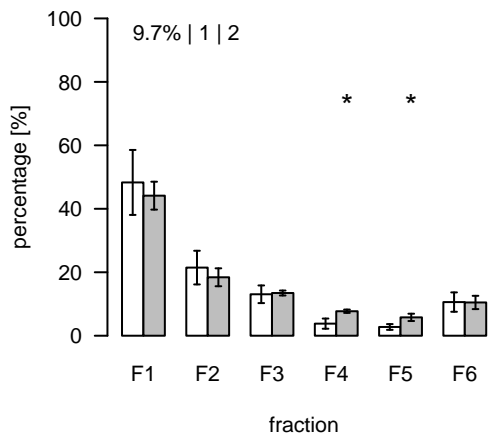

**S661 (m/z=638.399843; rt=14.91286)**  
T/S Cluster: S-14.9-2

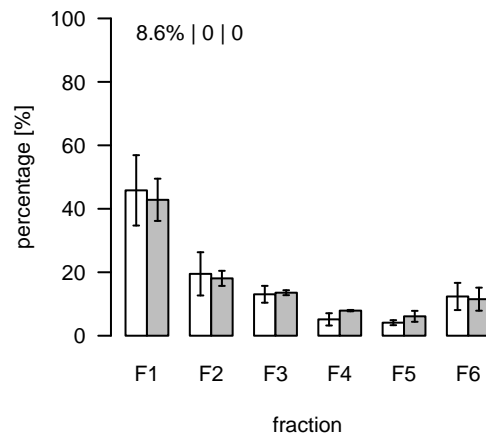



**S645 (m/z=284.331637; rt=14.88496)**  
T/S Cluster: S-14.9-3

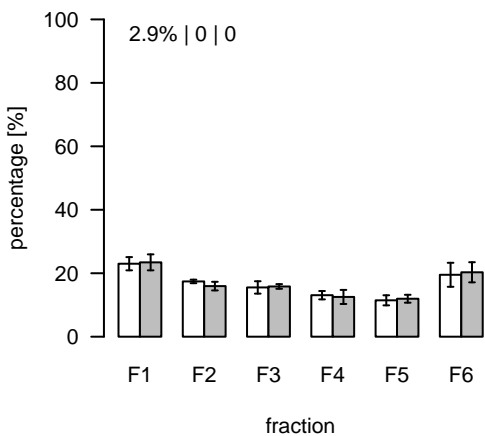

**S660 (m/z=674.441764; rt=14.91067)**  
T/S Cluster: S-14.9-3

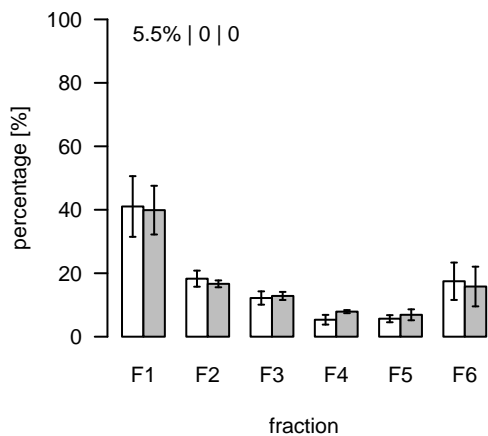

**S643 (m/z=284.328373; rt=14.88466)**  
T/S Cluster: S-14.9-3

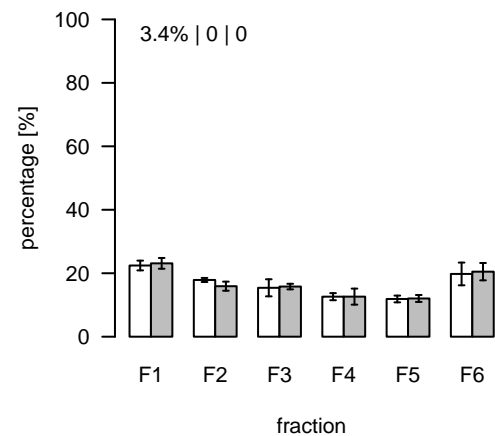

**S648 (m/z=980.619119; rt=14.9017)**  
T/S Cluster: S-14.9-4

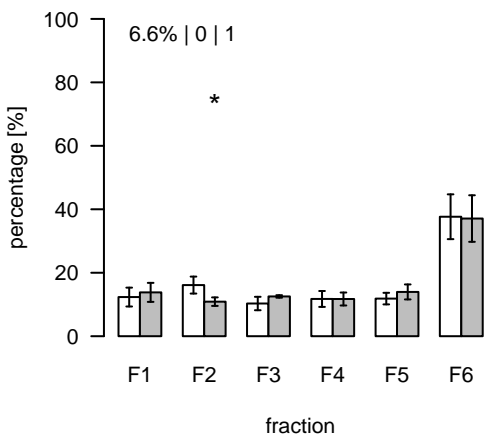

**S665 (m/z=483.369643; rt=14.93415)**  
T/S Cluster: S-14.9-5

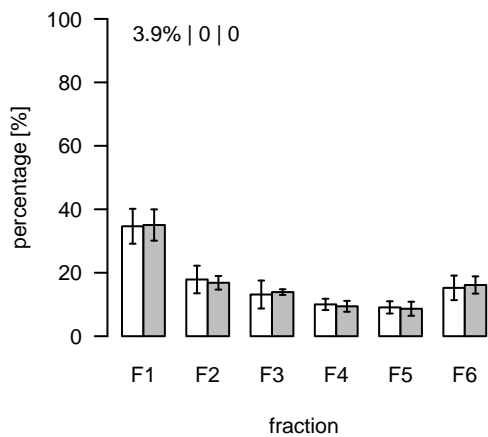

**S666 (m/z=808.49999; rt=14.94961)**  
T/S Cluster: S-14.9-6

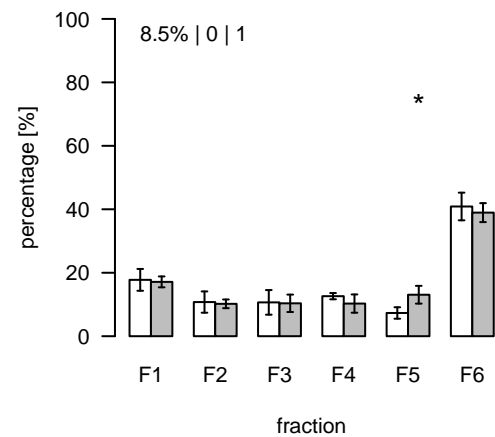

**S668 (m/z=804.54108; rt=14.97321)**  
T/S Cluster: S-15-1

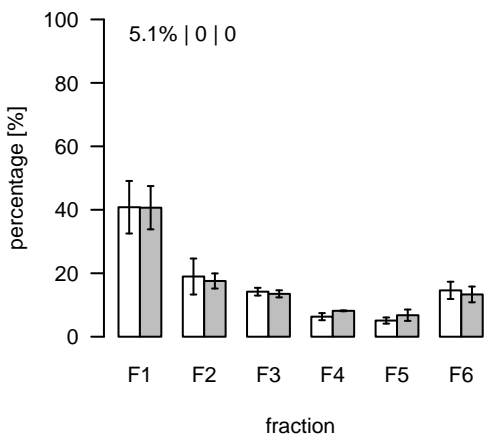

**S669 (m/z=804.541272; rt=14.9733)**  
T/S Cluster: S-15-1

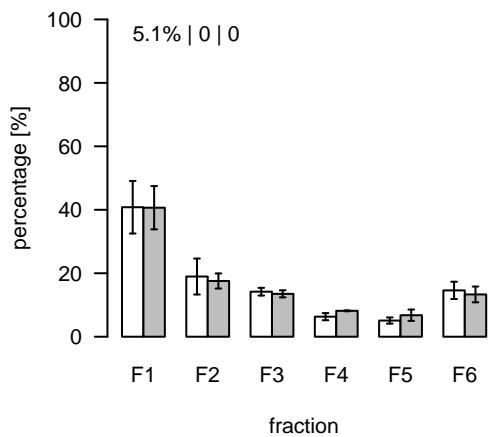

**S672 (m/z=692.452323; rt=14.99951)**  
T/S Cluster: S-15-1

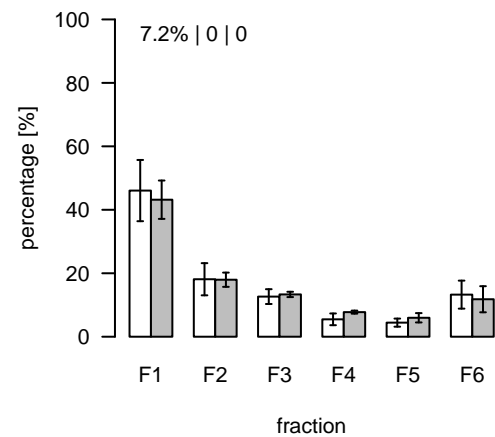

**S667 (m/z=805.544474; rt=14.97201)**  
T/S Cluster: S-15-1

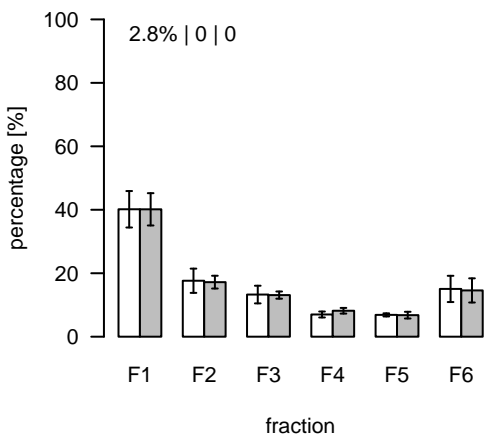

**S673 (m/z=758.440145; rt=15.00886)**  
T/S Cluster: S-15-1

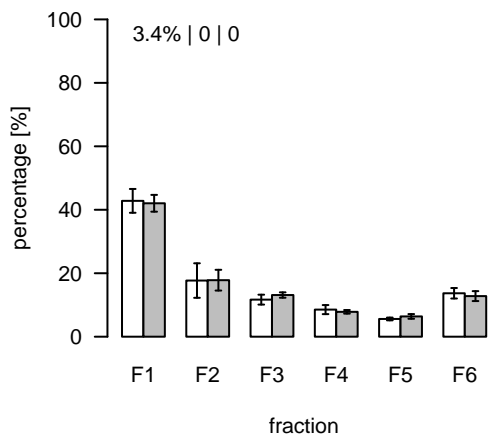

**S670 (m/z=467.374572; rt=14.97683)**  
T/S Cluster: S-15-2

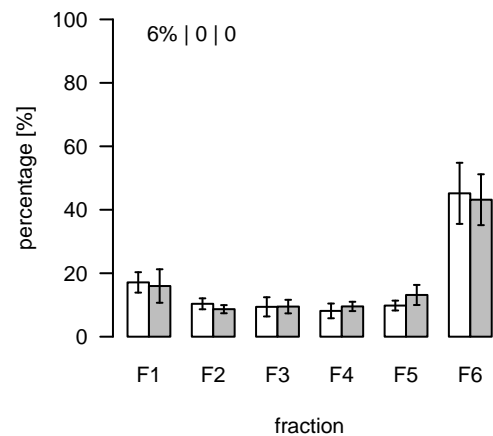

**S671 (m/z=656.416084; rt=14.97841)**  
T/S Cluster: S-15-3

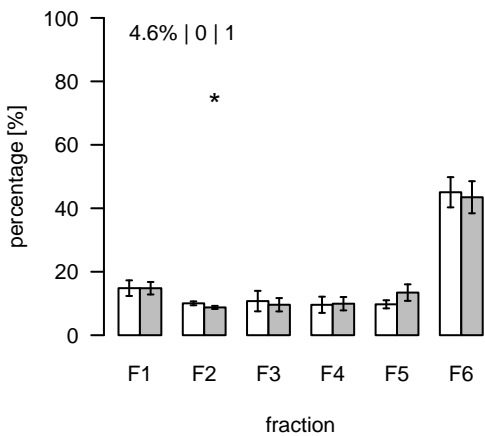

**S674 (m/z=823.770988; rt=15.11552)**  
T/S Cluster: S-15.1-1

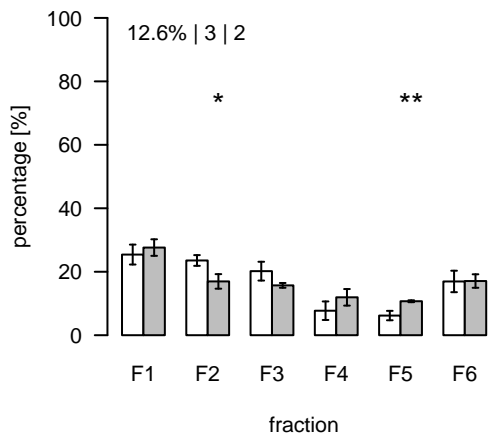

**S675 (m/z=802.525435; rt=15.11617)**  
T/S Cluster: S-15.1-2

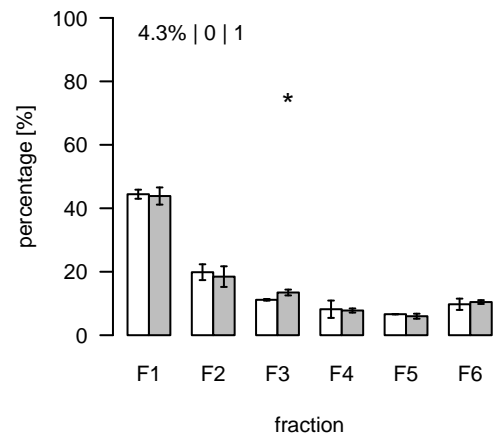

**S676 (m/z=803.527813; rt=15.12401)**  
T/S Cluster: S-15.1-3

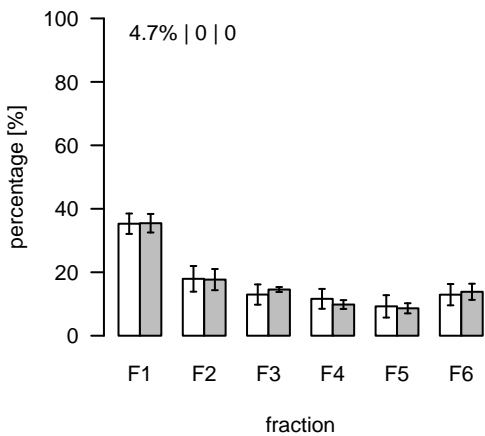

**S682 (m/z=636.426092; rt=15.19781)**  
T/S Cluster: S-15.2-1

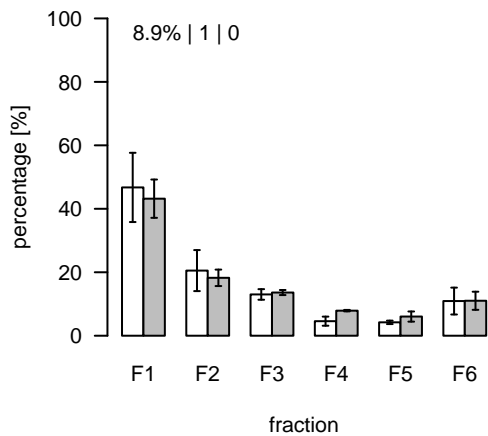

**S680 (m/z=636.402912; rt=15.19723)**  
T/S Cluster: S-15.2-1

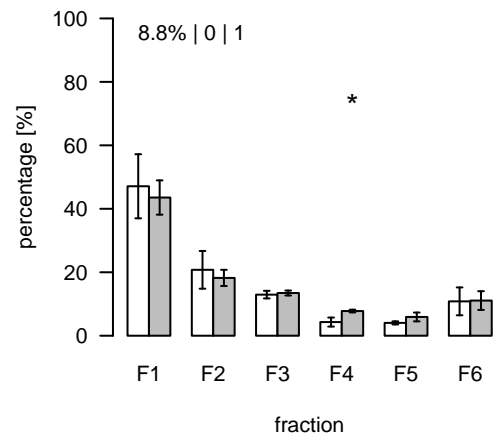

**S677 (m/z=636.426036; rt=15.17575)**  
T/S Cluster: S-15.2-1

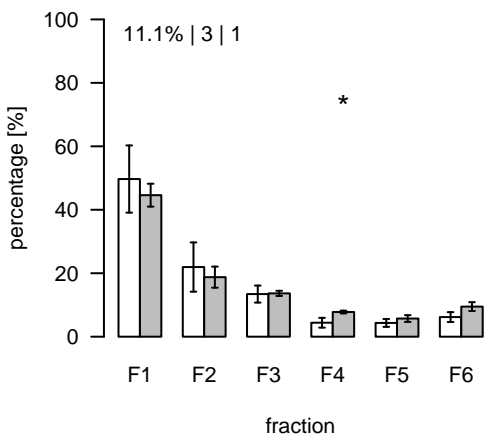

**S678 (m/z=704.452933; rt=15.17586)**  
T/S Cluster: S-15.2-1

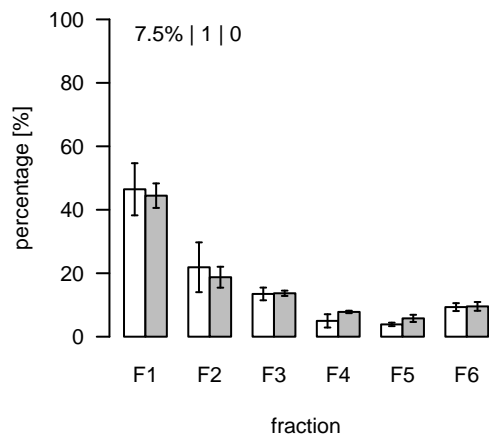

**S679 (m/z=704.485755; rt=15.17655)**  
T/S Cluster: S-15.2-1

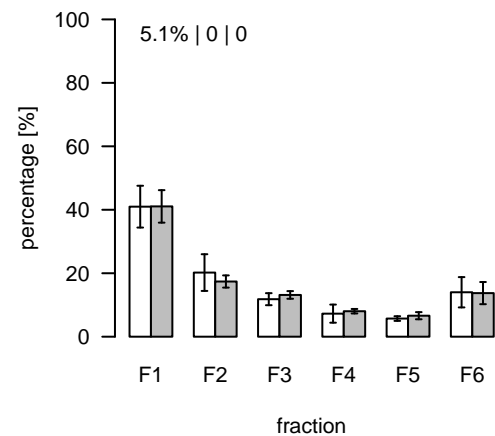

**S681 (m/z=637.429858; rt=15.19777)**  
T/S Cluster: S-15.2-1

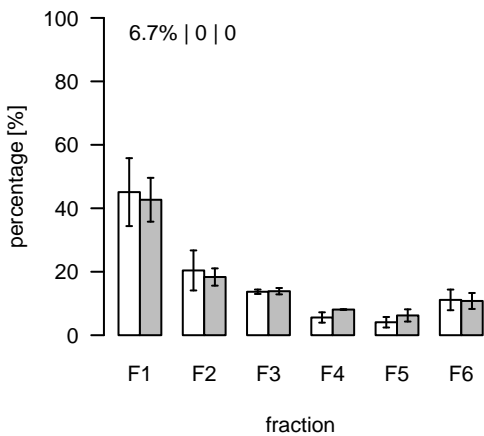

**S683 (m/z=437.781498; rt=15.23024)**  
T/S Cluster: S-15.2-2

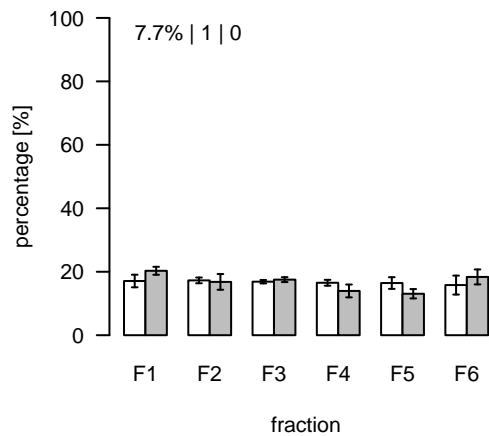

**S684 (m/z=524.372504; rt=15.25043)**  
T/S Cluster: S-15.3-1

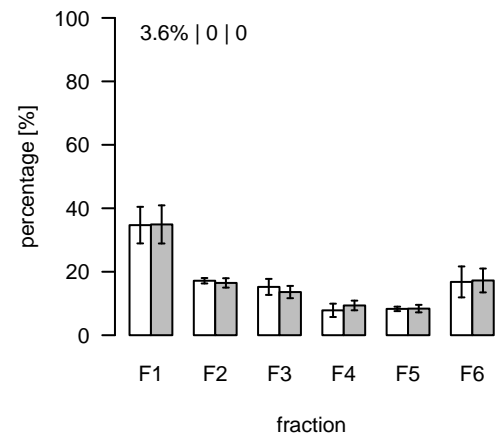

**S685 (m/z=806.558638; rt=15.30216)**  
T/S Cluster: S-15.3-2

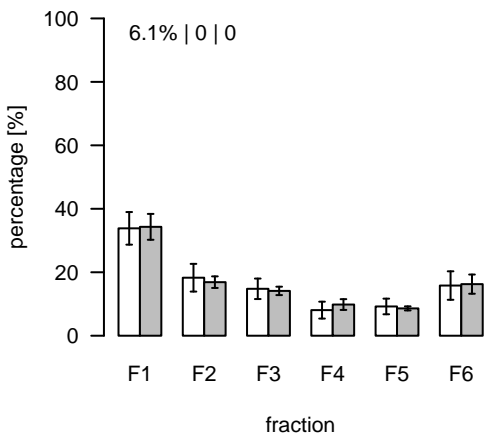

**S686 (m/z=827.523684; rt=15.30498)**  
T/S Cluster: S-15.3-3

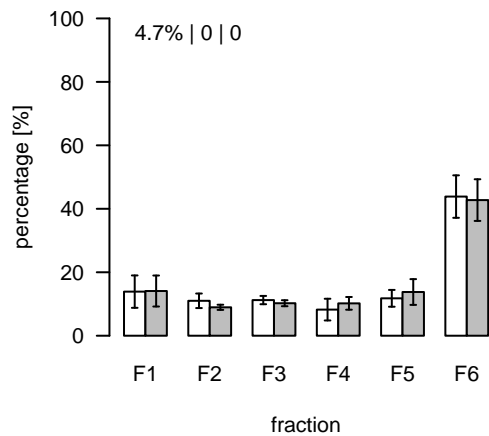

**S687 (m/z=826.519032; rt=15.31138)**  
T/S Cluster: S-15.3-4

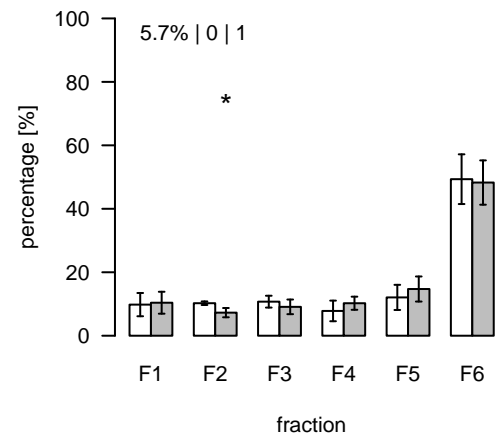

**S694 (m/z=650.441363; rt=15.39103)**  
T/S Cluster: S-15.4-1

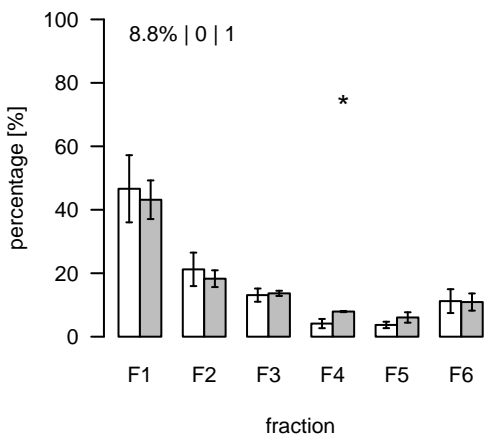

**S697 (m/z=651.445009; rt=15.39135)**  
T/S Cluster: S-15.4-1

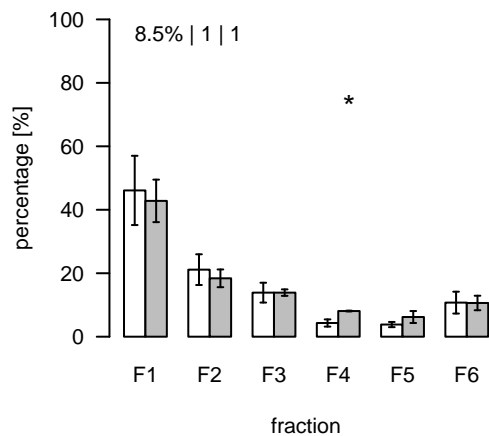

**S693 (m/z=650.409341; rt=15.39074)**  
T/S Cluster: S-15.4-1

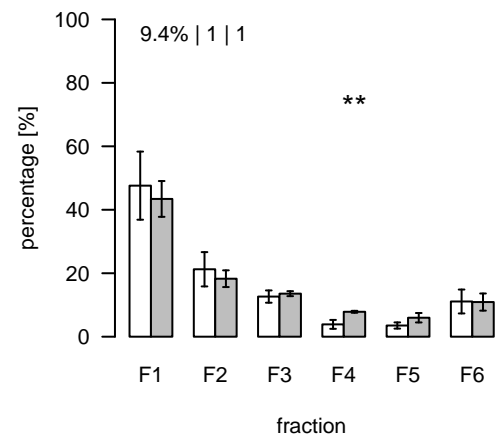

**S695 (m/z=325.221155; rt=15.39121)**  
T/S Cluster: S-15.4-1

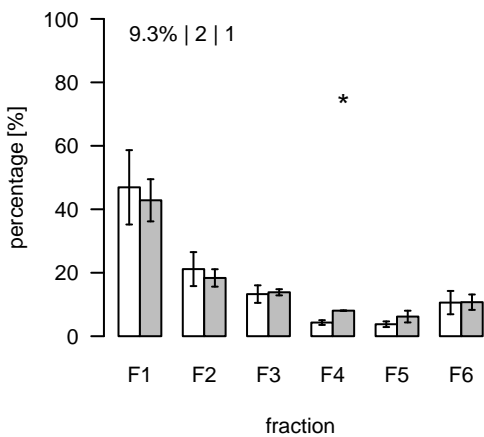

**S699 (m/z=676.457372; rt=15.43318)**  
T/S Cluster: S-15.4-1

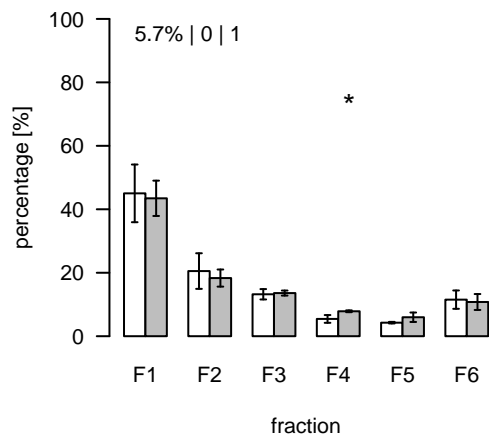

**S692 (m/z=651.403592; rt=15.39067)**  
T/S Cluster: S-15.4-1

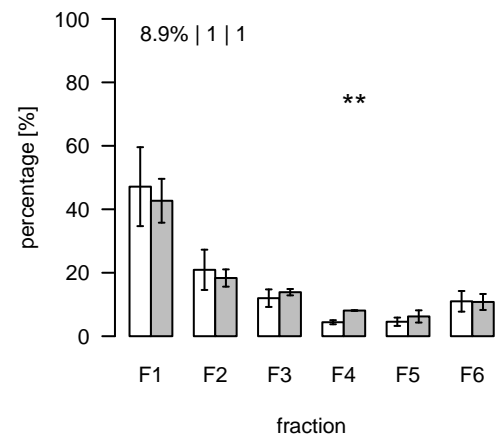

**S690 (m/z=840.519298; rt=15.37151)**  
T/S Cluster: S-15.4-1

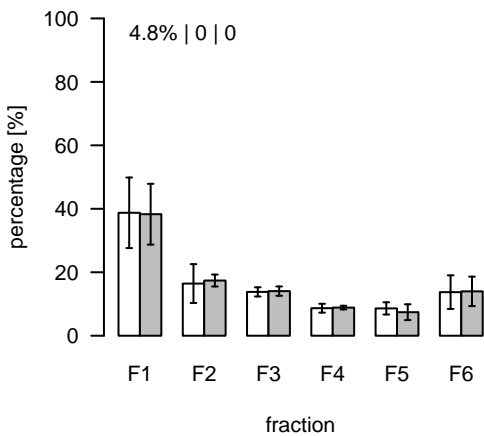

**S698 (m/z=677.460827; rt=15.43306)**  
T/S Cluster: S-15.4-1

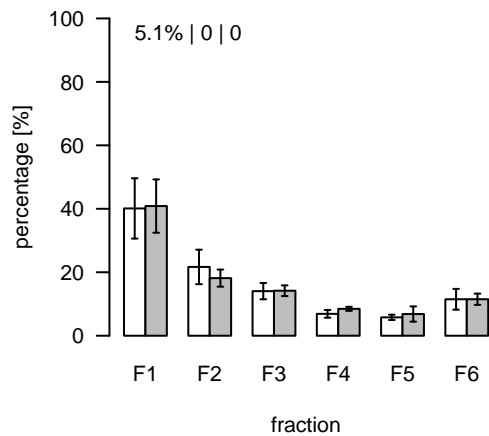

**S696 (m/z=652.449083; rt=15.39129)**  
T/S Cluster: S-15.4-1

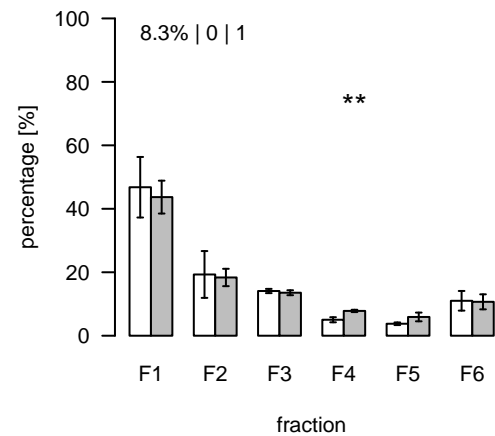

**S688** (m/z=608.394674; rt=15.36469)  
T/S Cluster: S-15.4-1

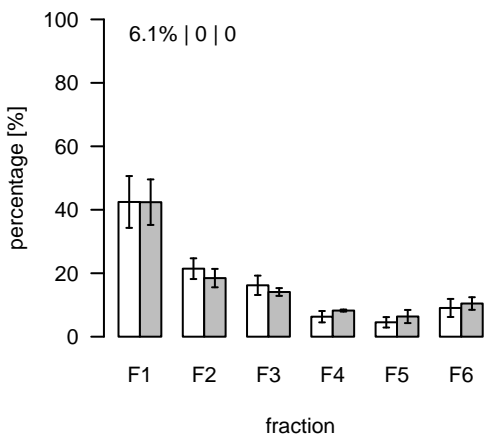

**S689** (m/z=437.78848; rt=15.36697)  
T/S Cluster: S-15.4-2

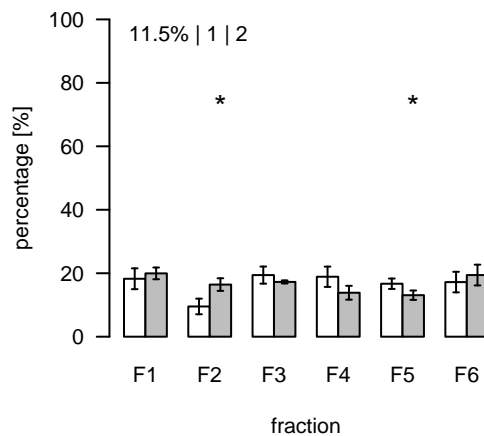

**S691** (m/z=467.374566; rt=15.37281)  
T/S Cluster: S-15.4-3

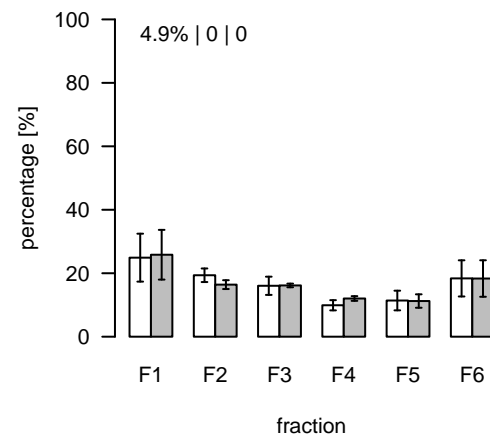

**S700** (m/z=808.542853; rt=15.44717)  
T/S Cluster: S-15.4-4

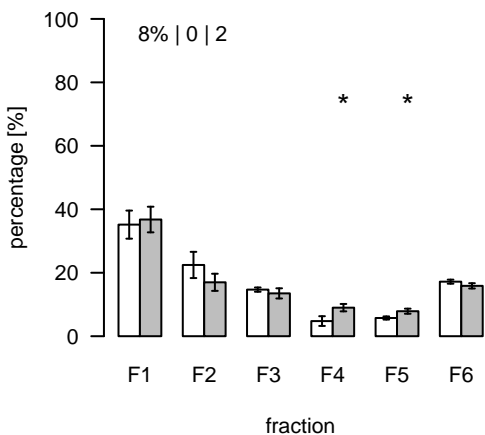

**S701** (m/z=808.573696; rt=15.45445)  
T/S Cluster: S-15.5-1

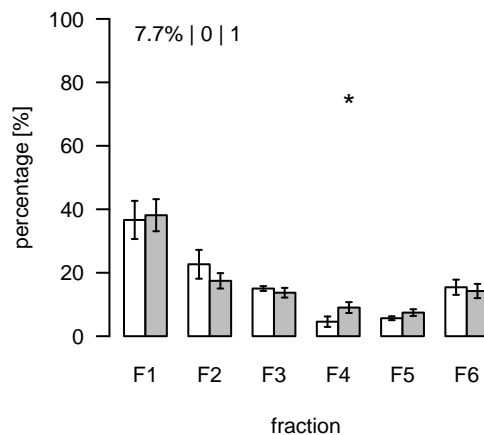

**S703** (m/z=808.573555; rt=15.45964)  
T/S Cluster: S-15.5-1

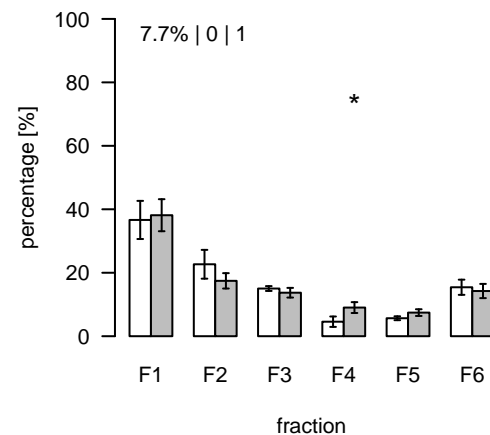

**S705** (m/z=808.573615; rt=15.51055)  
T/S Cluster: S-15.5-1

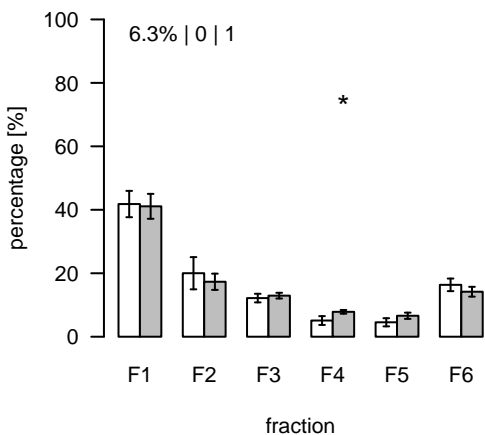

**S702** (m/z=809.576206; rt=15.45873)  
T/S Cluster: S-15.5-1

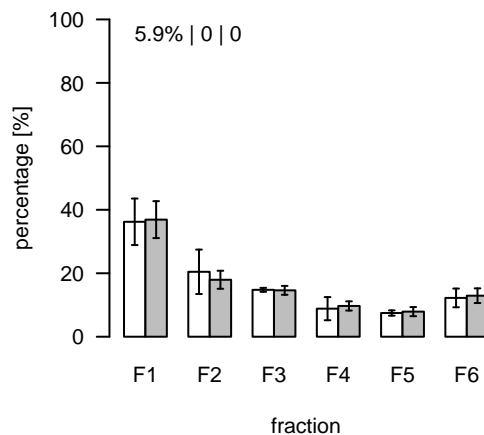

**S704** (m/z=809.576754; rt=15.51047)  
T/S Cluster: S-15.5-1

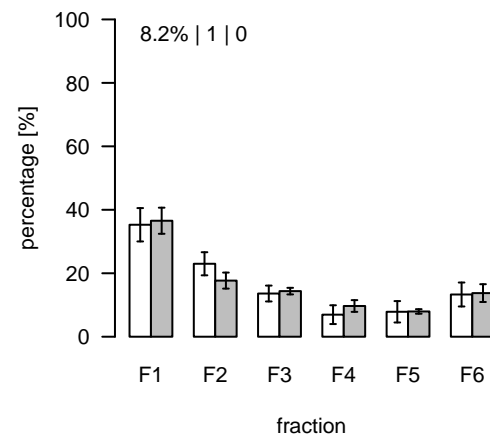

**S706 (m/z=790.5612; rt=15.54154)**  
T/S Cluster: S-15.5-2

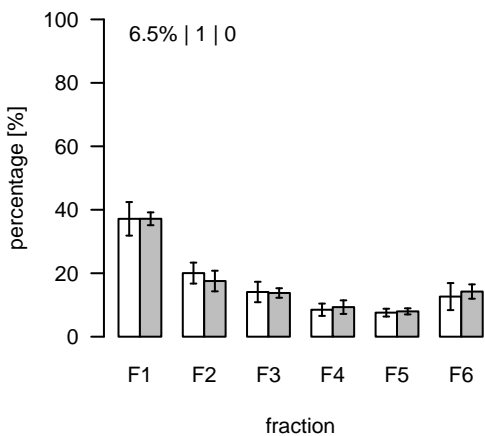

**S707 (m/z=790.561085; rt=15.54543)**  
T/S Cluster: S-15.5-2

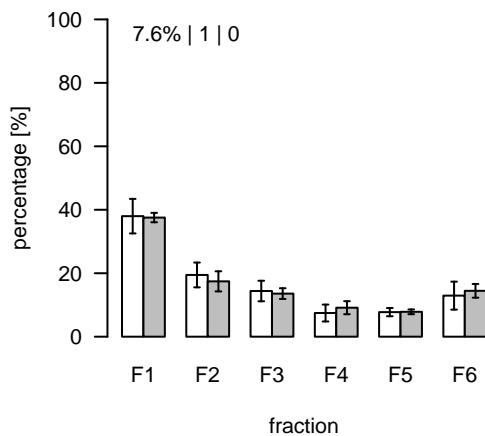

**S708 (m/z=774.566459; rt=15.58079)**  
T/S Cluster: S-15.6-1

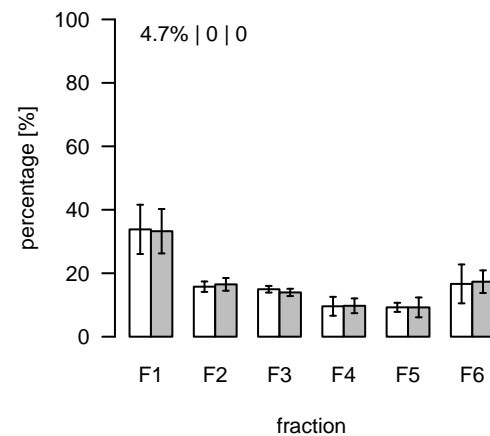

**S710 (m/z=970.614203; rt=15.5985)**  
T/S Cluster: S-15.6-2

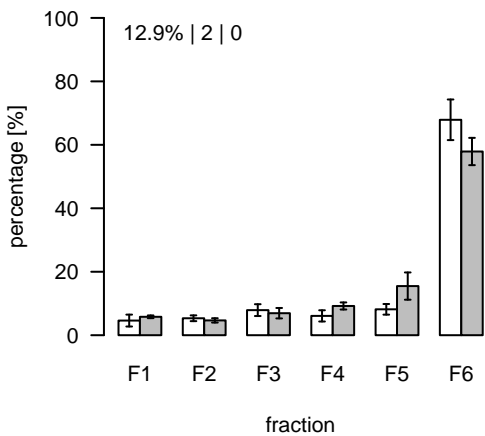

**S709 (m/z=971.616914; rt=15.59826)**  
T/S Cluster: S-15.6-2

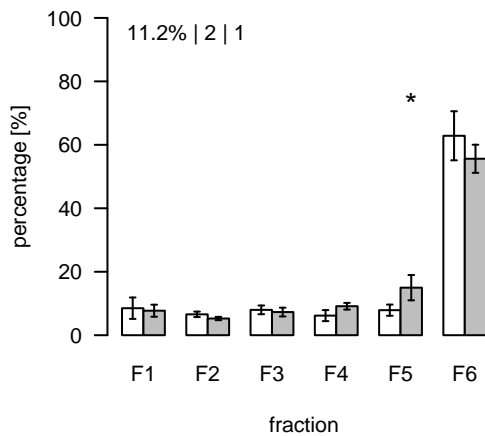

**S711 (m/z=806.558599; rt=15.63072)**  
T/S Cluster: S-15.6-3

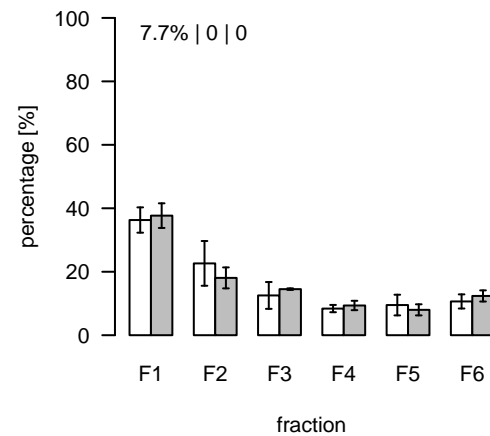

**S712 (m/z=621.273075; rt=15.6634)**  
T/S Cluster: S-15.7-1

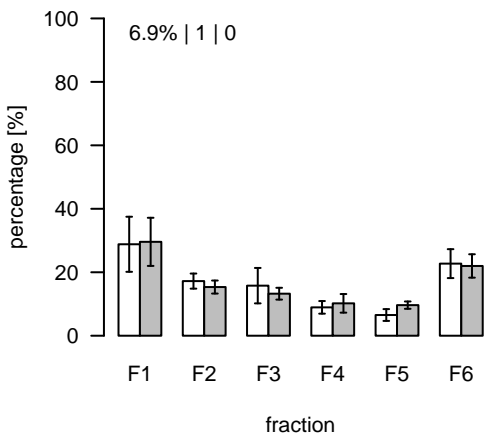

**S713 (m/z=778.540749; rt=15.68086)**  
T/S Cluster: S-15.7-2

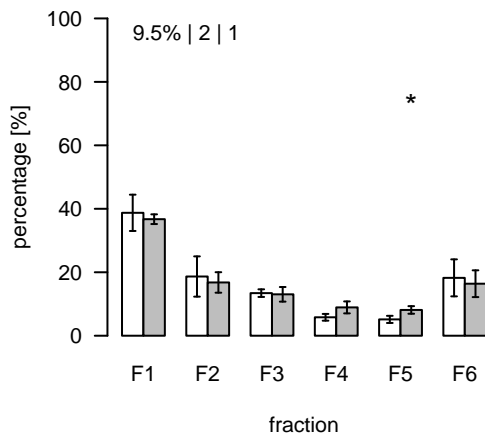

**S714 (m/z=779.542996; rt=15.68172)**  
T/S Cluster: S-15.7-2

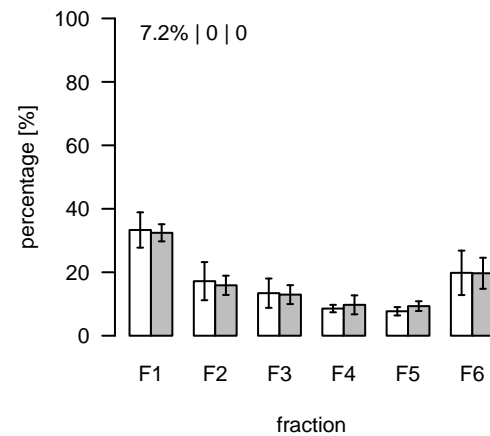

**S715 (m/z=968.598738; rt=15.68854)**  
T/S Cluster: S-15.7-3

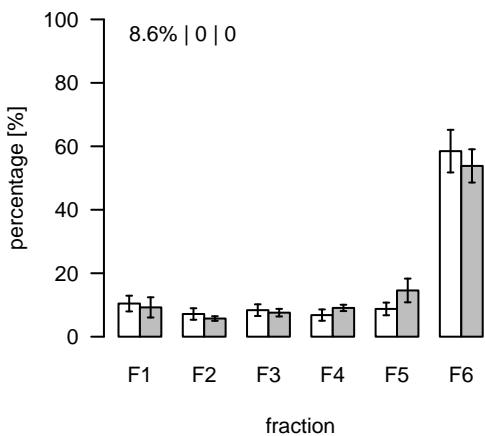

**S716 (m/z=774.576551; rt=15.69756)**  
T/S Cluster: S-15.7-4

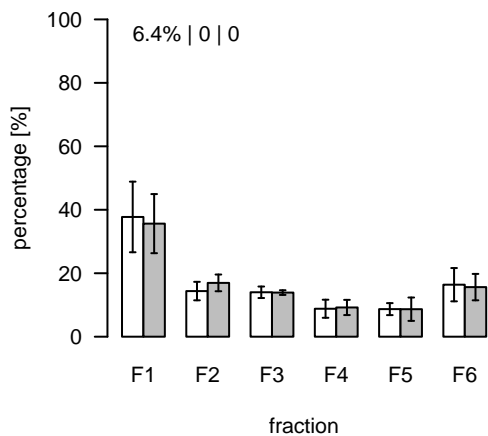

**S717 (m/z=823.628113; rt=15.70538)**  
T/S Cluster: S-15.7-5

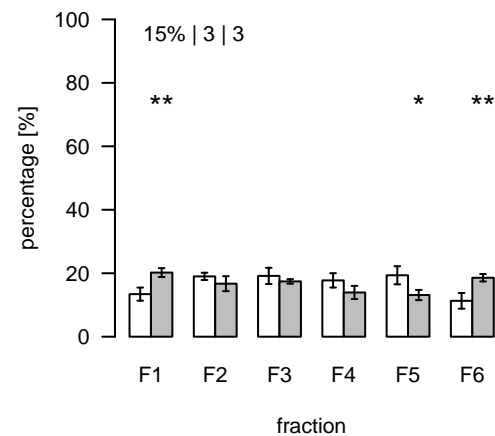

**S718 (m/z=823.776178; rt=15.71102)**  
T/S Cluster: S-15.7-6

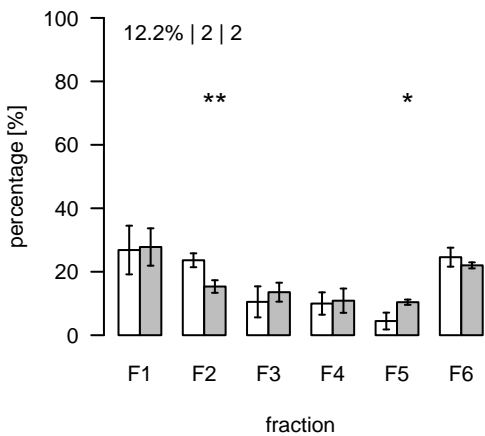

**S719 (m/z=437.788332; rt=15.7147)**  
T/S Cluster: S-15.7-7

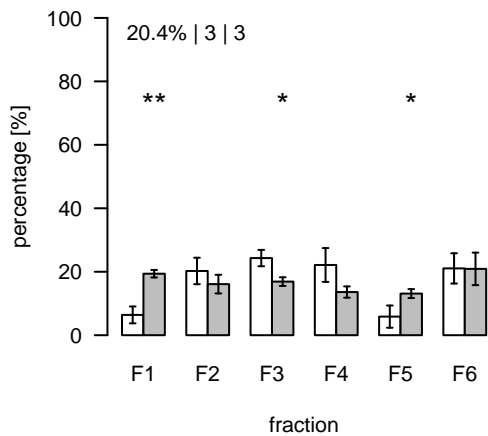

**S720 (m/z=934.651184; rt=15.76412)**  
T/S Cluster: S-15.8-1

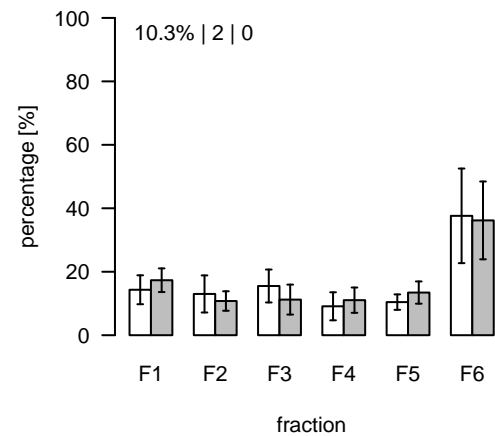

**S721 (m/z=593.278104; rt=15.76523)**  
T/S Cluster: S-15.8-2

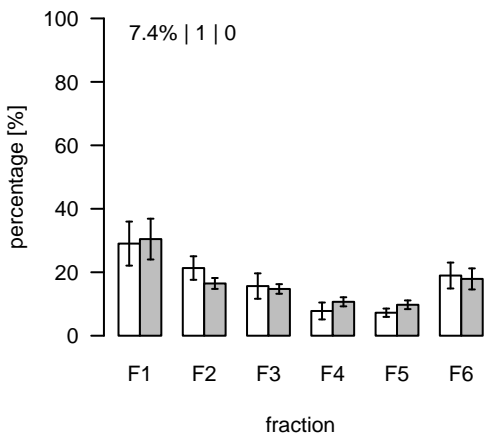

**S722 (m/z=594.281559; rt=15.76659)**  
T/S Cluster: S-15.8-2

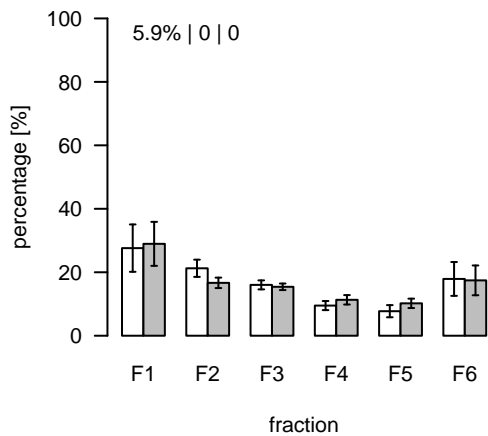

**S723 (m/z=782.570095; rt=15.78642)**  
T/S Cluster: S-15.8-3

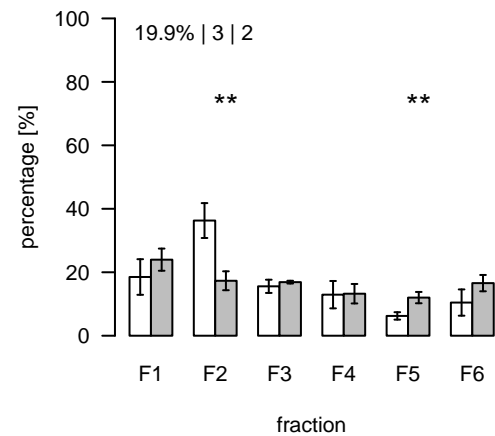

**S725 (m/z=780.548834; rt=15.80955)**  
T/S Cluster: S-15.8-4

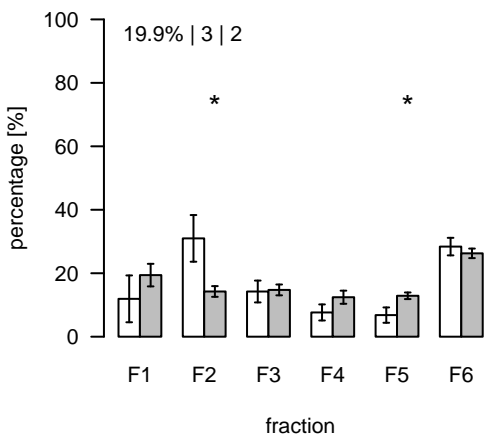

**S724 (m/z=781.553168; rt=15.80651)**  
T/S Cluster: S-15.8-4

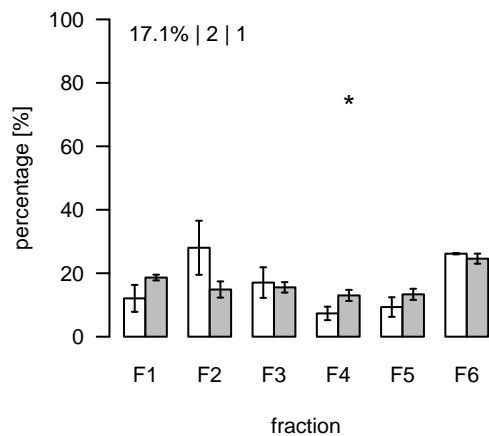

**S727 (m/z=680.483317; rt=15.81148)**  
T/S Cluster: S-15.8-5

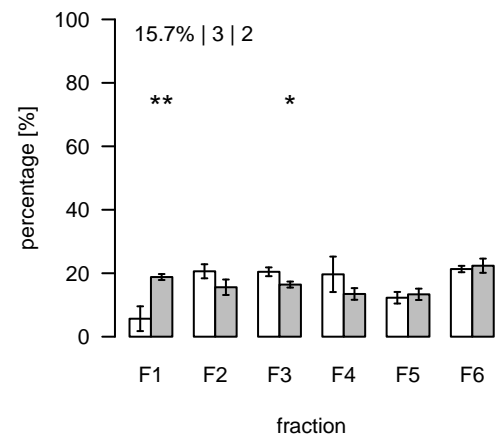

**S728 (m/z=663.456218; rt=15.81352)**  
T/S Cluster: S-15.8-5

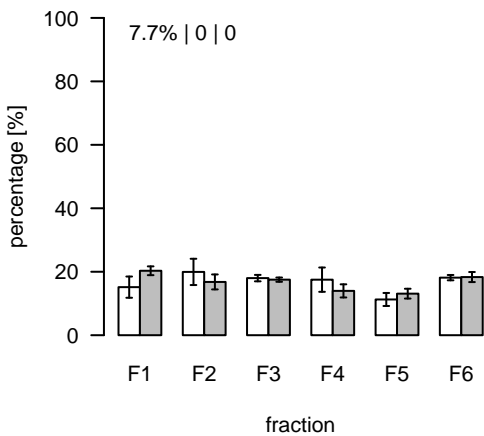

**S726 (m/z=681.485995; rt=15.81049)**  
T/S Cluster: S-15.8-5

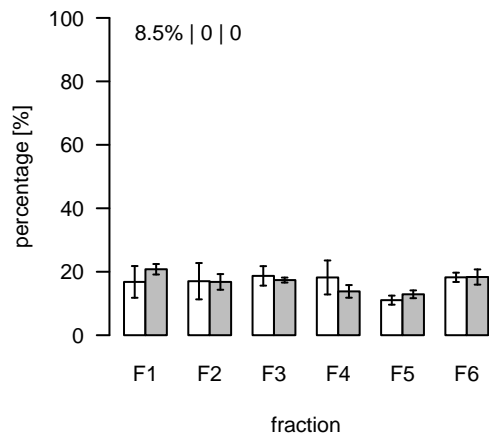

**S729 (m/z=664.460749; rt=15.81597)**  
T/S Cluster: S-15.8-6

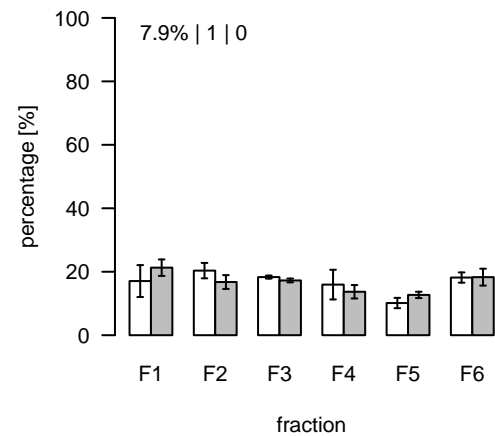

**S731 (m/z=664.461377; rt=15.84875)**  
T/S Cluster: S-15.8-6

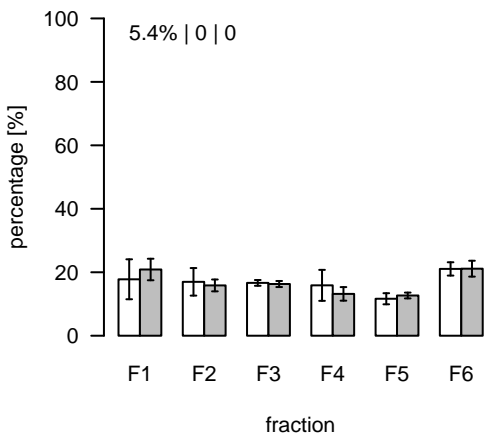

**S730 (m/z=665.465304; rt=15.81686)**  
T/S Cluster: S-15.8-7

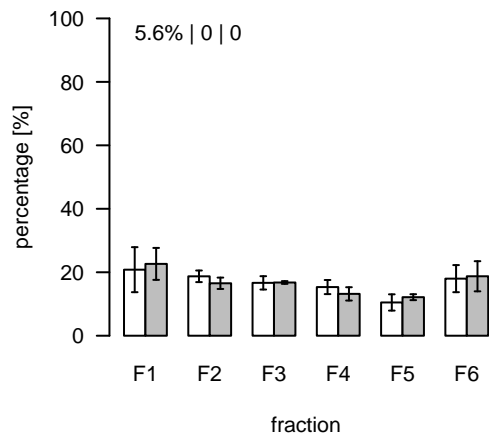

**S732 (m/z=772.591338; rt=15.84883)**  
T/S Cluster: S-15.8-8

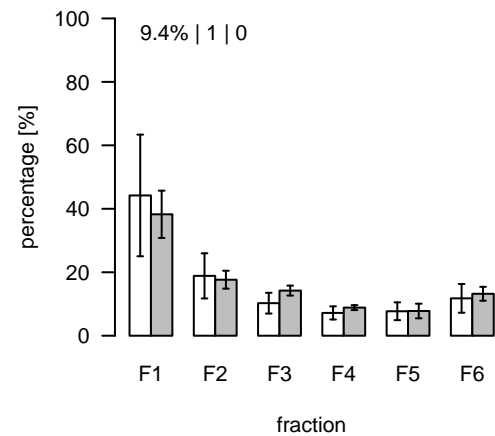



**S733 (m/z=437.763823; rt=15.85591)**  
T/S Cluster: S-15.9-1

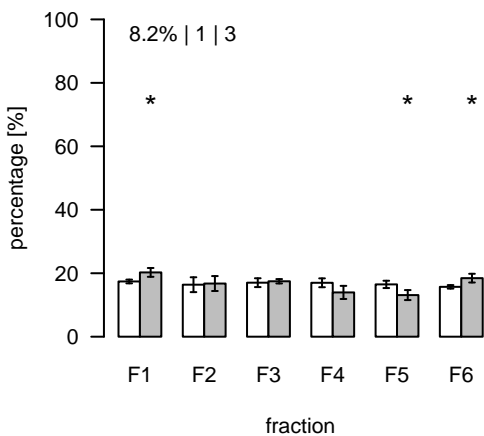

**S734 (m/z=781.558387; rt=15.87082)**  
T/S Cluster: S-15.9-2

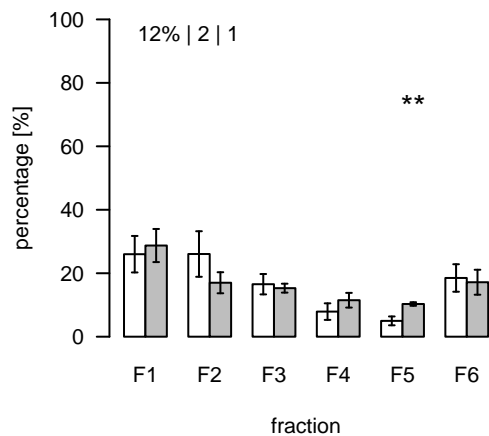

**S735 (m/z=832.526539; rt=15.90134)**  
T/S Cluster: S-15.9-3

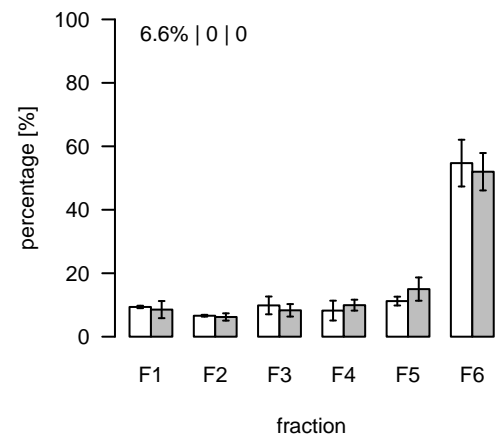

**S737 (m/z=833.531607; rt=15.9037)**  
T/S Cluster: S-15.9-3

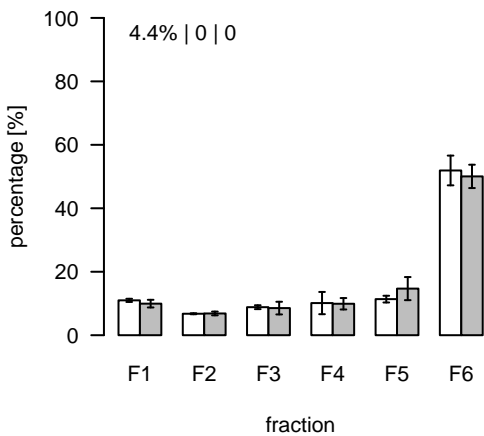

**S738 (m/z=833.531831; rt=15.9037)**  
T/S Cluster: S-15.9-3

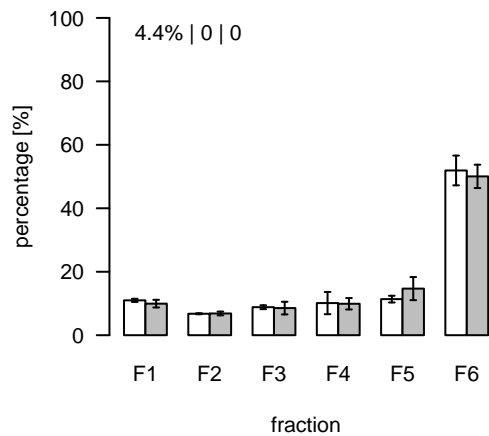

**S736 (m/z=608.526586; rt=15.90251)**  
T/S Cluster: S-15.9-4

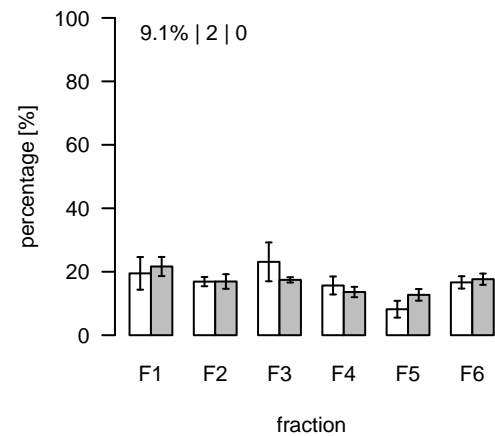

**S739 (m/z=815.502012; rt=15.90648)**  
T/S Cluster: S-15.9-5

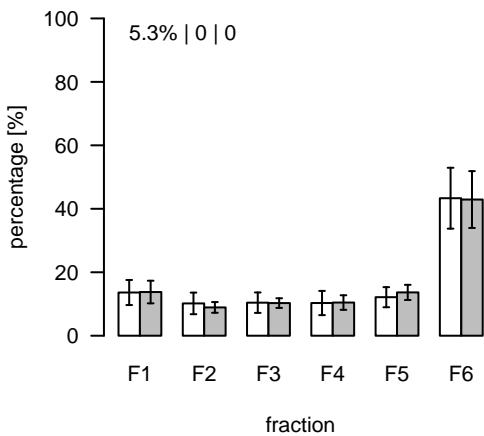

**S740 (m/z=770.580489; rt=15.92412)**  
T/S Cluster: S-15.9-6

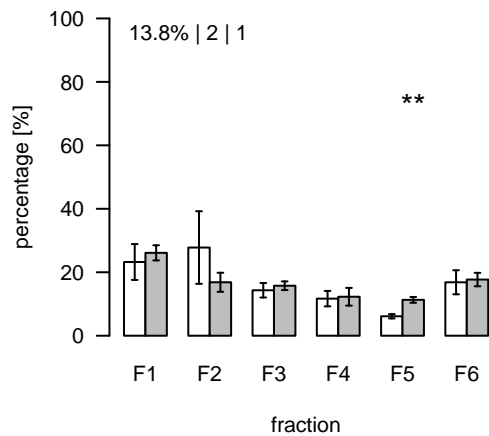

**S741 (m/z=770.580618; rt=15.92413)**  
T/S Cluster: S-15.9-6

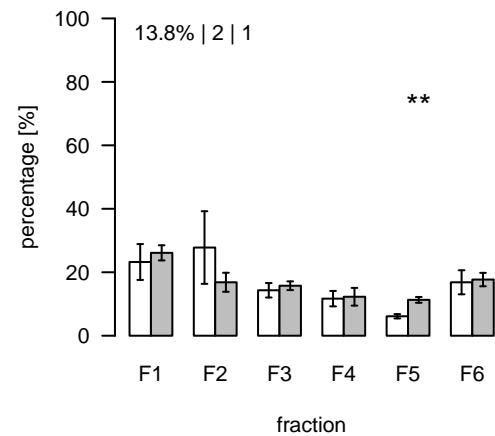

**S742 (m/z=574.433426; rt=15.96251)**  
T/S Cluster: S-16-1

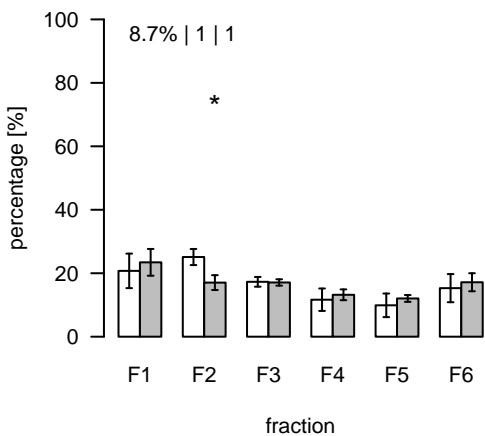

**S745 (m/z=808.559956; rt=15.96632)**  
T/S Cluster: S-16-2

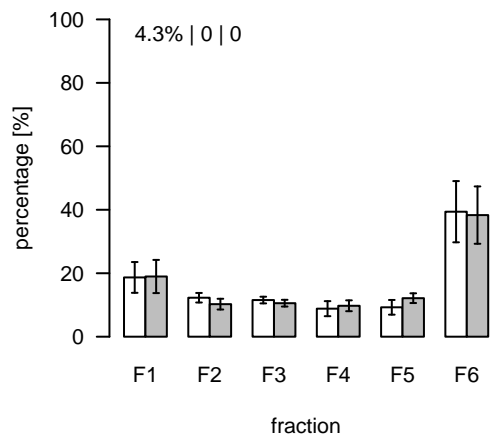

**S746 (m/z=809.562993; rt=15.96821)**  
T/S Cluster: S-16-2

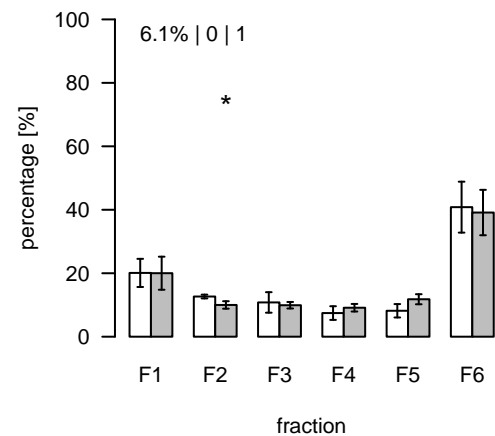

**S743 (m/z=611.470232; rt=15.96571)**  
T/S Cluster: S-16-2

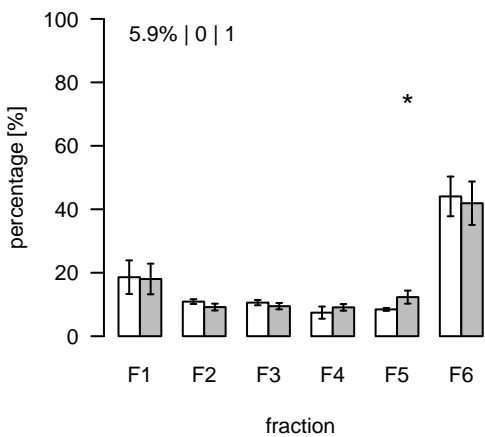

**S744 (m/z=611.470133; rt=15.96573)**  
T/S Cluster: S-16-2

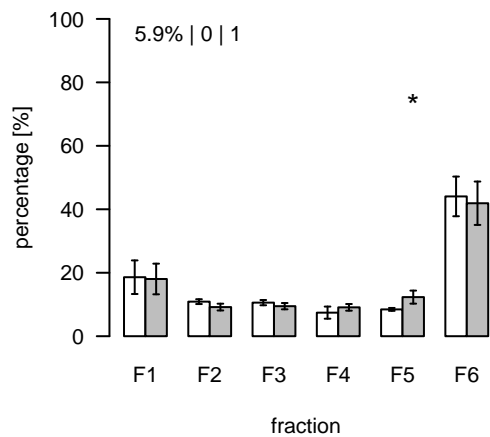

**S747 (m/z=848.52352; rt=15.9723)**  
T/S Cluster: S-16-3

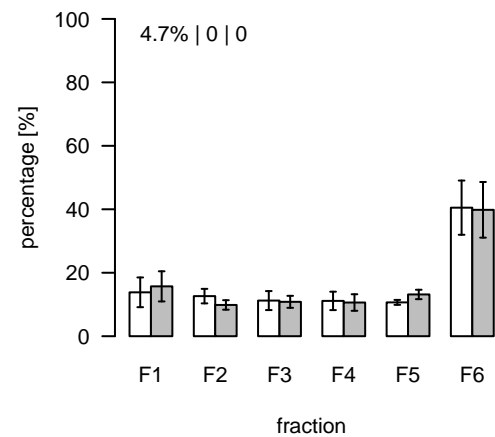

**S750 (m/z=518.406788; rt=16.0437)**  
T/S Cluster: S-16-4

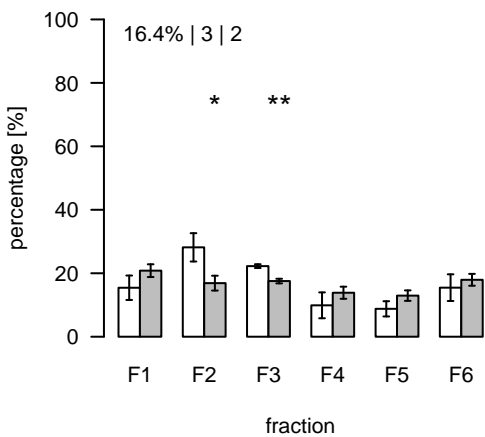

**S748 (m/z=313.274291; rt=16.04002)**  
T/S Cluster: S-16-4

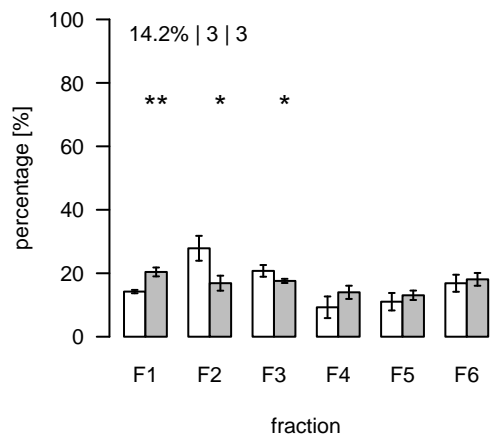

**S752 (m/z=245.138671; rt=16.04413)**  
T/S Cluster: S-16-4

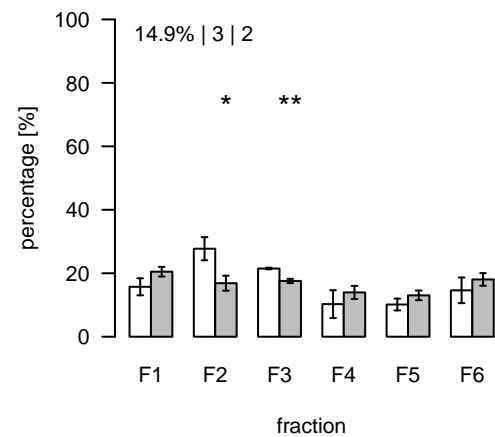

**S754 (m/z=483.369505; rt=16.04463)**  
T/S Cluster: S-16-4

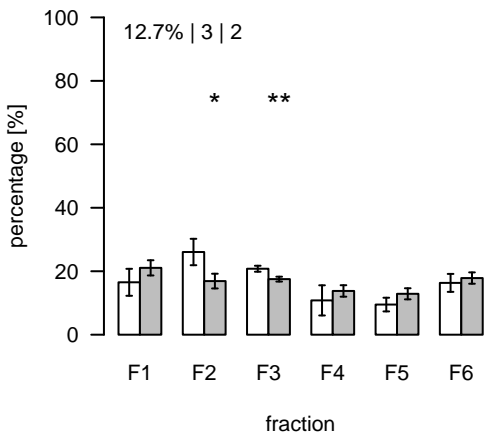

**S757 (m/z=523.362178; rt=16.04577)**  
T/S Cluster: S-16-4

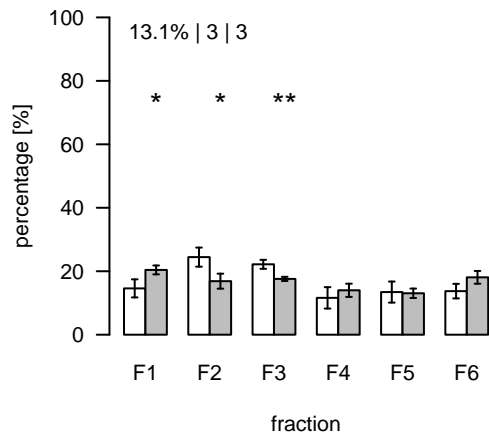

**S751 (m/z=245.135722; rt=16.0439)**  
T/S Cluster: S-16-4

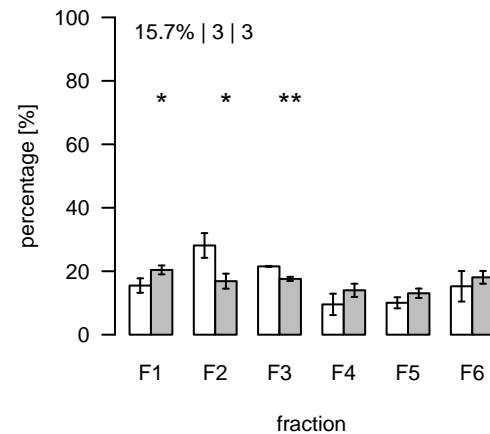

**S755 (m/z=227.12817; rt=16.0449)**  
T/S Cluster: S-16-4

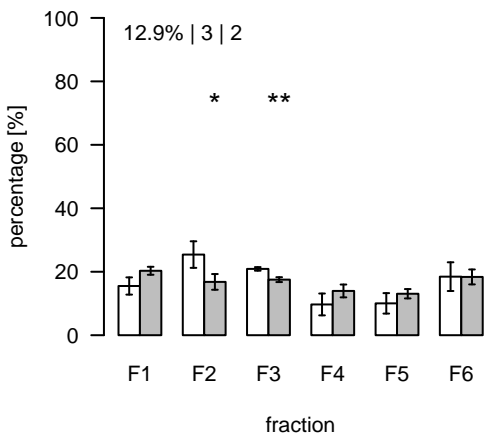

**S756 (m/z=523.35095; rt=16.04548)**  
T/S Cluster: S-16-4

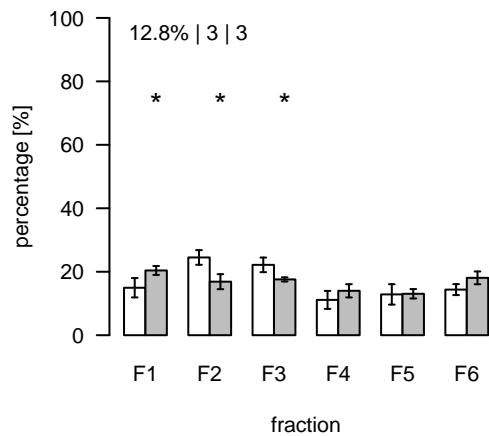

**S749 (m/z=518.388251; rt=16.04333)**  
T/S Cluster: S-16-4

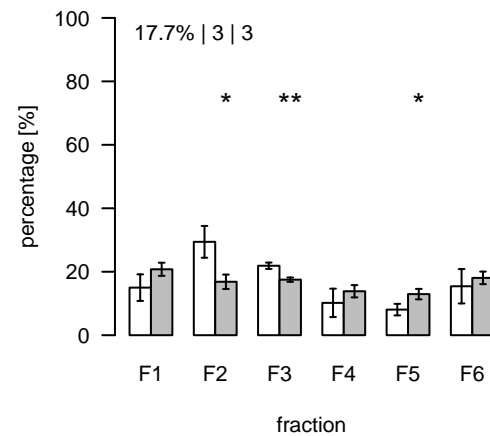

**S753 (m/z=519.410174; rt=16.04428)**  
T/S Cluster: S-16-4

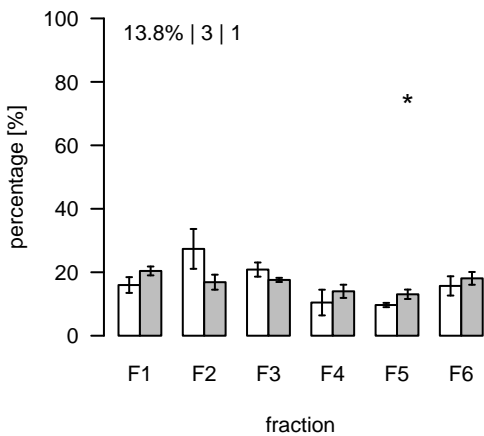

**S758 (m/z=656.512254; rt=16.0926)**  
T/S Cluster: S-16.1-1

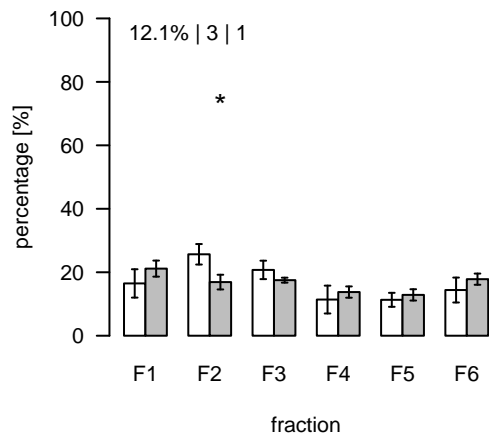

**S759 (m/z=926.587026; rt=16.14998)**  
T/S Cluster: S-16.1-2

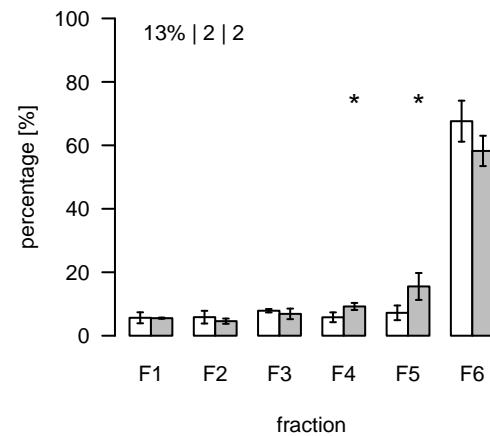

**S760 (m/z=437.741349; rt=16.15152)**  
T/S Cluster: S-16.2-1

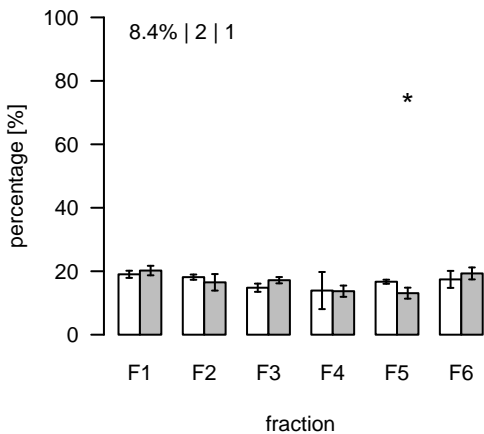

**S761 (m/z=437.770233; rt=16.15265)**  
T/S Cluster: S-16.2-2

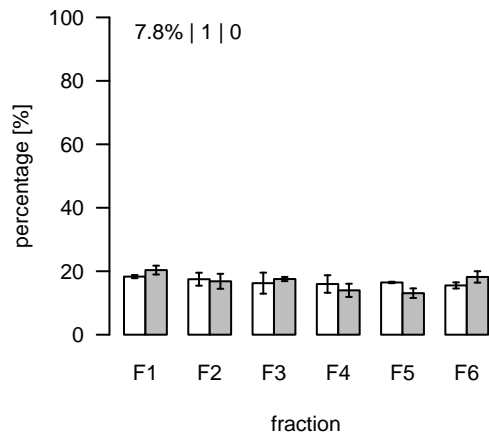

**S762 (m/z=926.587194; rt=16.16484)**  
T/S Cluster: S-16.2-3

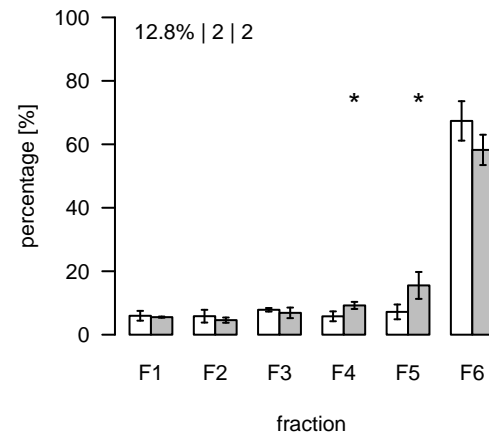

**S763 (m/z=927.59025; rt=16.16518)**  
T/S Cluster: S-16.2-3

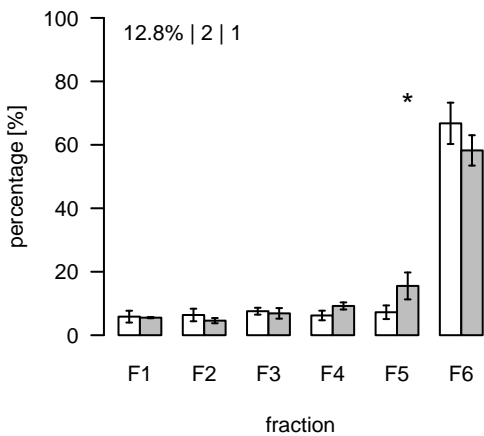

**S765 (m/z=473.399988; rt=16.19971)**  
T/S Cluster: S-16.2-4

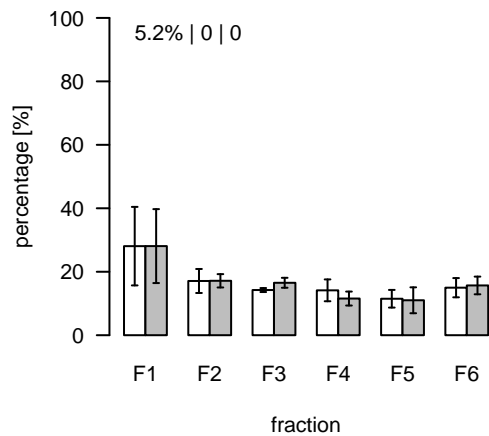

**S764 (m/z=473.389551; rt=16.19396)**  
T/S Cluster: S-16.2-4

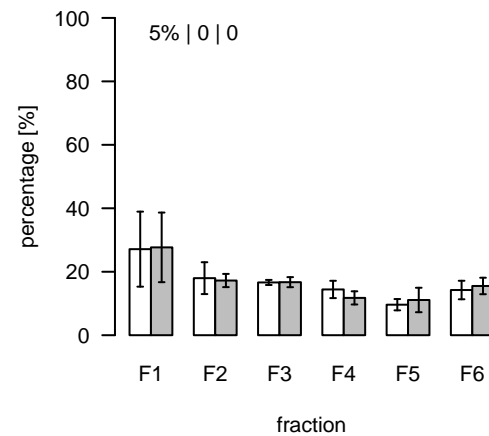

**S771 (m/z=607.294204; rt=16.21602)**  
T/S Cluster: S-16.2-5

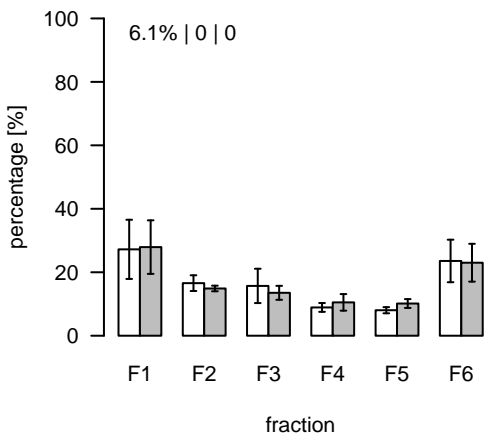

**S769 (m/z=608.297051; rt=16.21584)**  
T/S Cluster: S-16.2-5

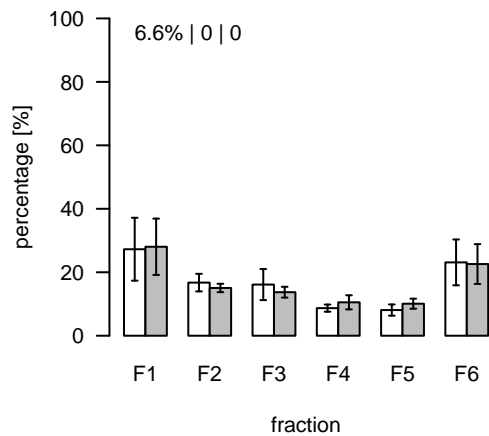

**S770 (m/z=608.297139; rt=16.21584)**  
T/S Cluster: S-16.2-5

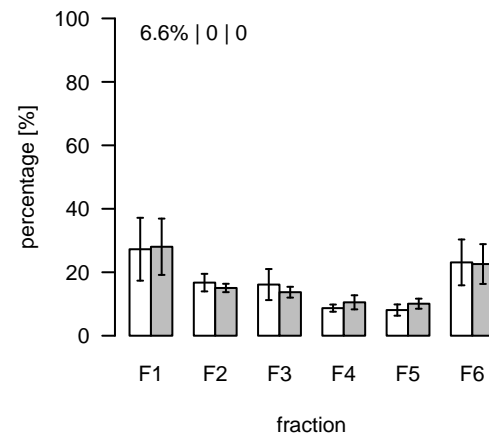

**S768 (m/z=607.264228; rt=16.21581)**  
T/S Cluster: S-16.2-5

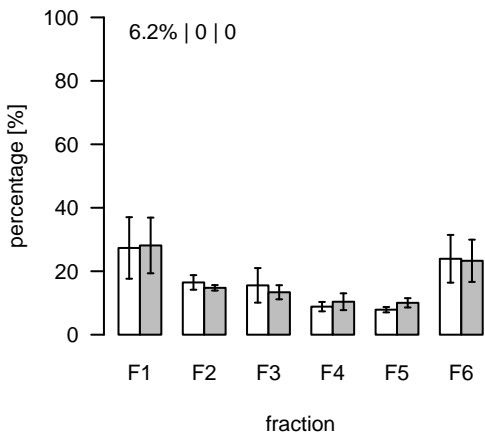

**S774 (m/z=303.646433; rt=16.21619)**  
T/S Cluster: S-16.2-5

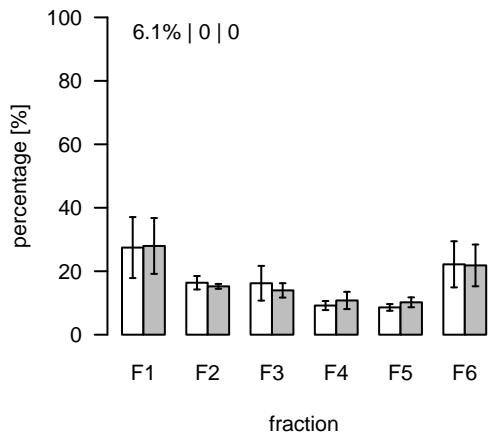

**S773 (m/z=303.650248; rt=16.2161)**  
T/S Cluster: S-16.2-5

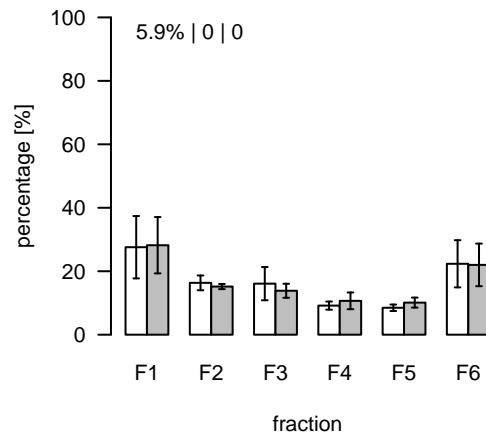

**S766 (m/z=609.300313; rt=16.21559)**  
T/S Cluster: S-16.2-5

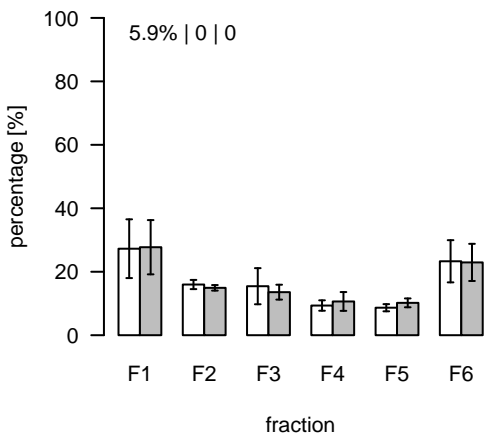

**S767 (m/z=304.151404; rt=16.21574)**  
T/S Cluster: S-16.2-5

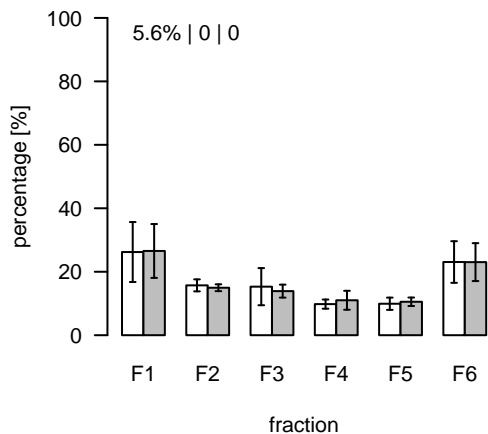

**S772 (m/z=304.148106; rt=16.21606)**  
T/S Cluster: S-16.2-5

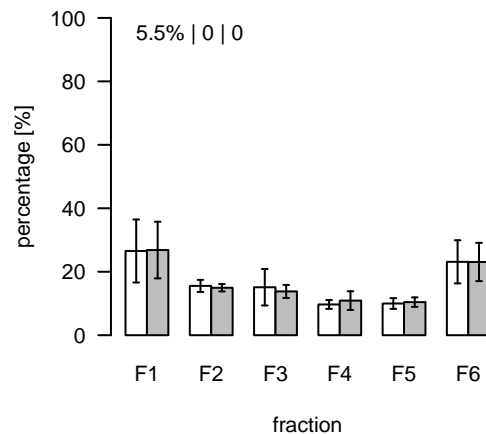

**S775 (m/z=202.433674; rt=16.21653)**  
T/S Cluster: S-16.2-5

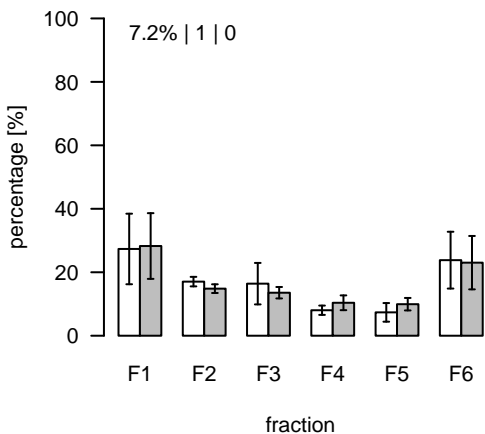

**S778 (m/z=856.526911; rt=16.24273)**  
T/S Cluster: S-16.2-6

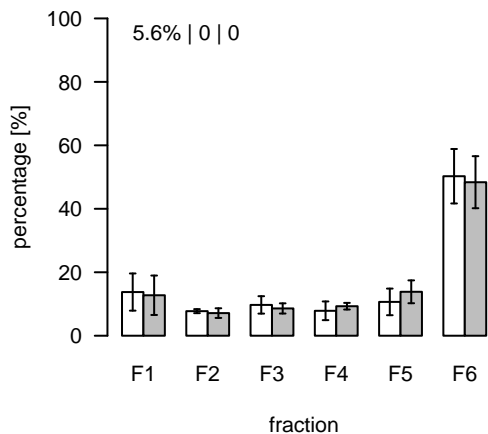

**S777 (m/z=857.531196; rt=16.24222)**  
T/S Cluster: S-16.2-6

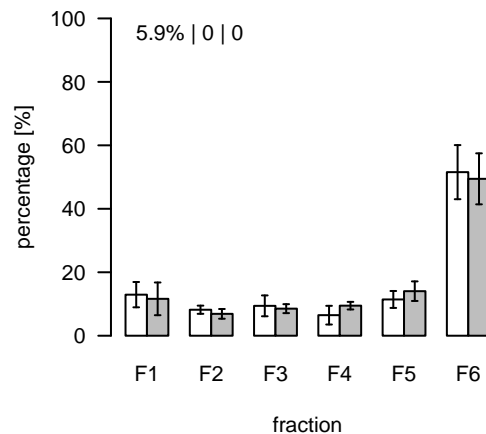

**S776 (m/z=858.532452; rt=16.2402)**  
T/S Cluster: S-16.2-6

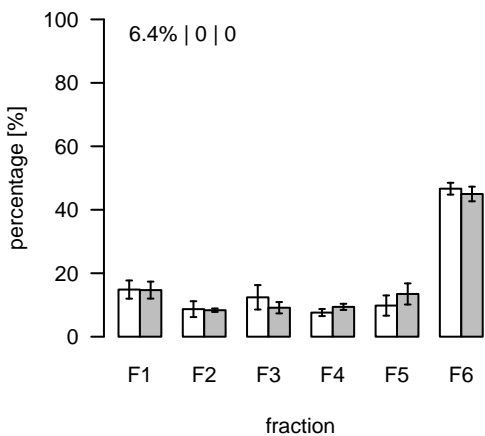

**S779 (m/z=589.485136; rt=16.24941)**  
T/S Cluster: S-16.2-7

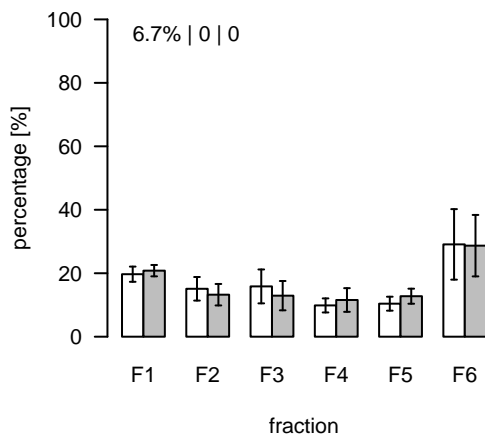

**S780 (m/z=823.770377; rt=16.25868)**  
T/S Cluster: S-16.3-1

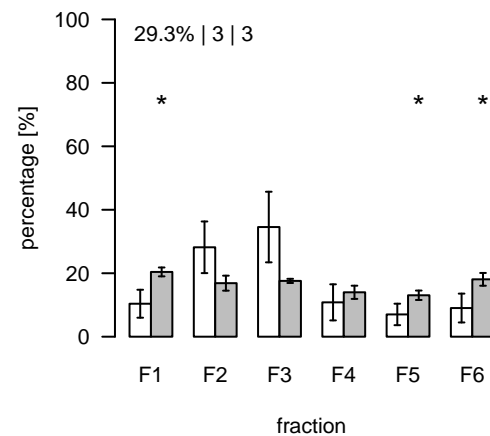

**S781 (m/z=948.628884; rt=16.28658)**  
T/S Cluster: S-16.3-2

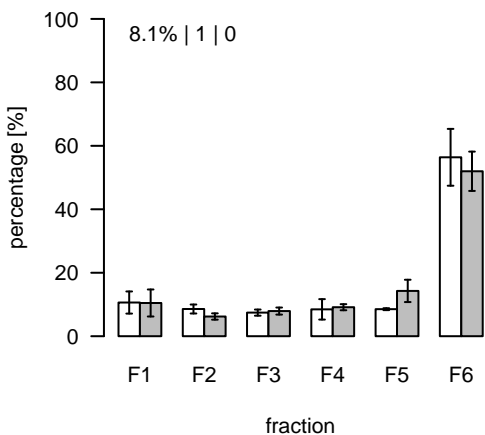

**S783 (m/z=932.634107; rt=16.30739)**  
T/S Cluster: S-16.3-3

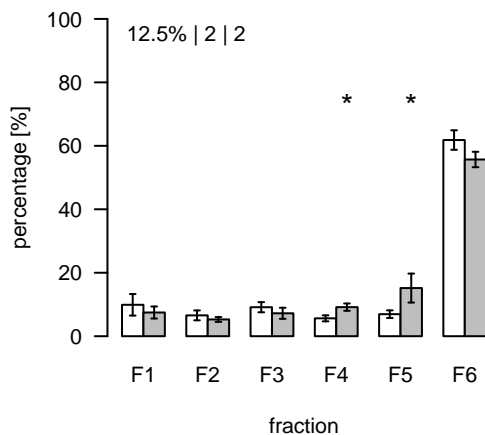

**S784 (m/z=933.638359; rt=16.30825)**  
T/S Cluster: S-16.3-3

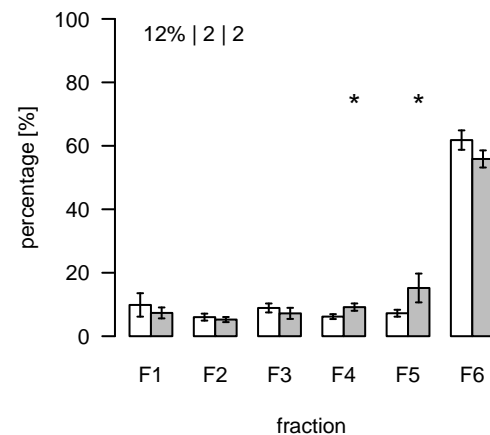

**S782 (m/z=934.640574; rt=16.30614)**  
T/S Cluster: S-16.3-3

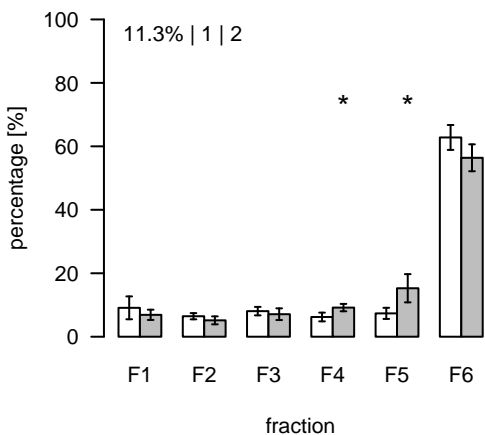

**S785 (m/z=466.317677; rt=16.30998)**  
T/S Cluster: S-16.3-3

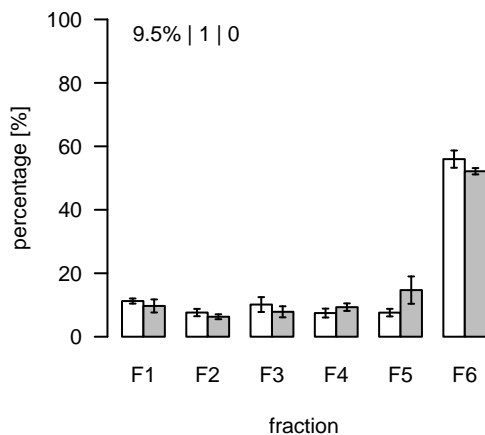

**S786 (m/z=466.324245; rt=16.31003)**  
T/S Cluster: S-16.3-3

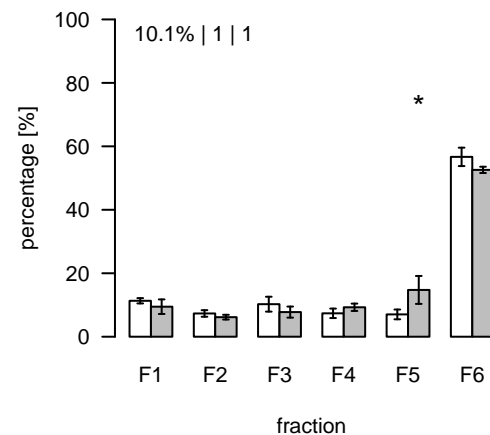

**S787 (m/z=660.544276; rt=16.40128)**  
T/S Cluster: S-16.4-1

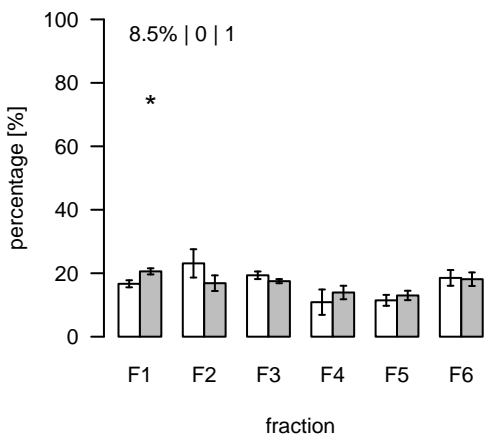

**S788 (m/z=660.544253; rt=16.40128)**  
T/S Cluster: S-16.4-1

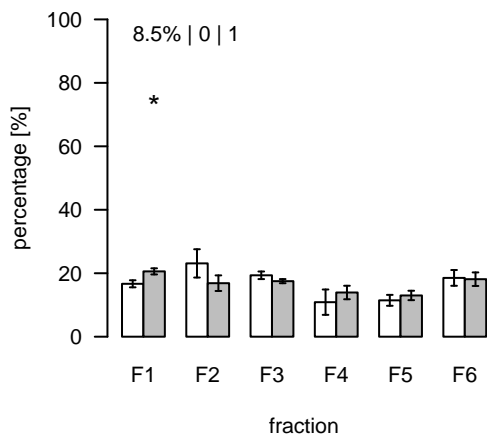

**S795 (m/z=313.274315; rt=16.45657)**  
T/S Cluster: S-16.5-1

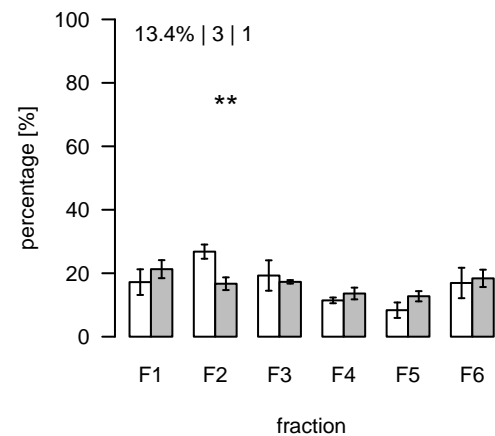

**S790 (m/z=229.143892; rt=16.45352)**  
T/S Cluster: S-16.5-1

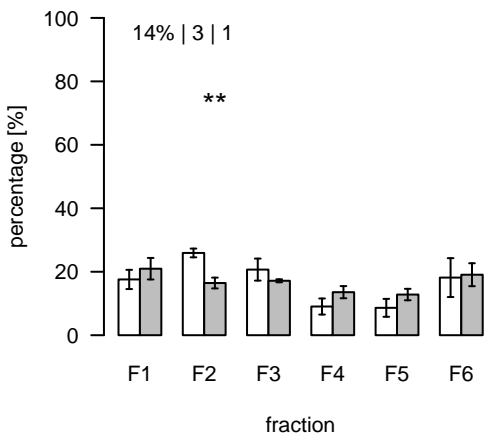

**S794 (m/z=502.411724; rt=16.4559)**  
T/S Cluster: S-16.5-1

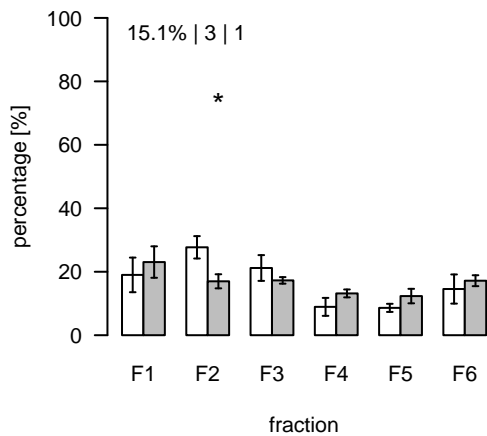

**S791 (m/z=229.140805; rt=16.45363)**  
T/S Cluster: S-16.5-1

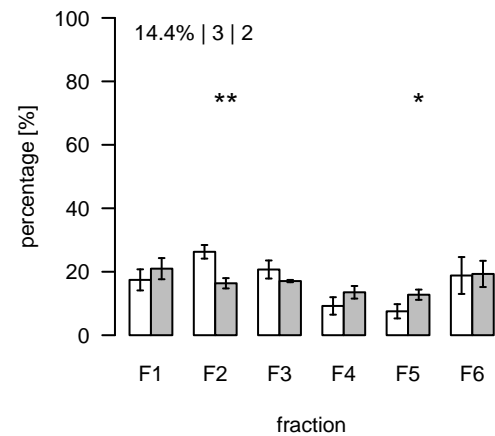

**S792 (m/z=507.367056; rt=16.4553)**  
T/S Cluster: S-16.5-1

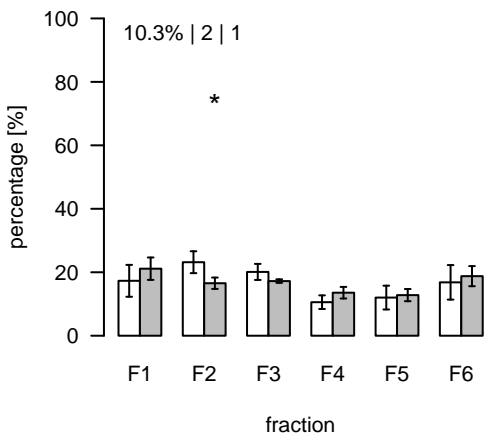

**S789 (m/z=467.37429; rt=16.45233)**  
T/S Cluster: S-16.5-1

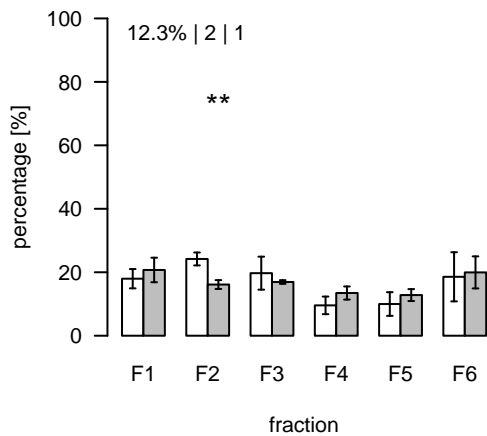

**S793 (m/z=523.341148; rt=16.45578)**  
T/S Cluster: S-16.5-1

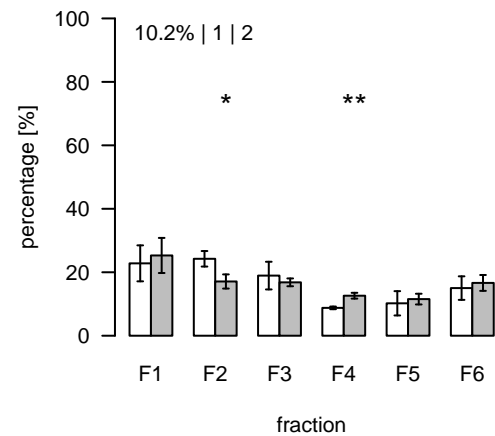

**S804 (m/z=502.411836; rt=16.50575)**  
T/S Cluster: S-16.5-1

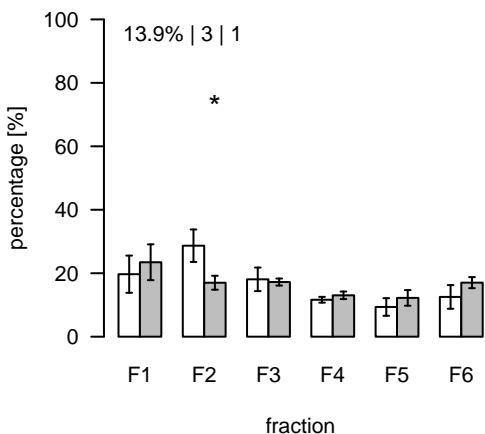

**S796 (m/z=503.415017; rt=16.45699)**  
T/S Cluster: S-16.5-1

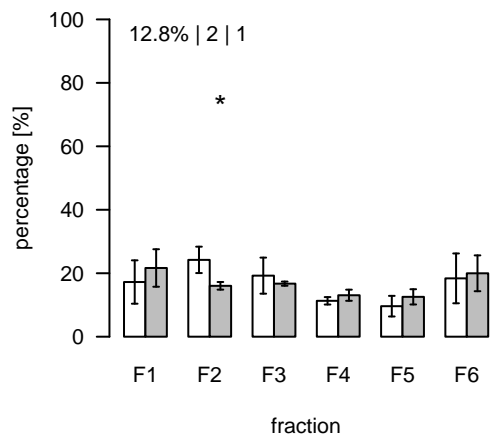

**S797 (m/z=803.54631; rt=16.48865)**  
T/S Cluster: S-16.5-2

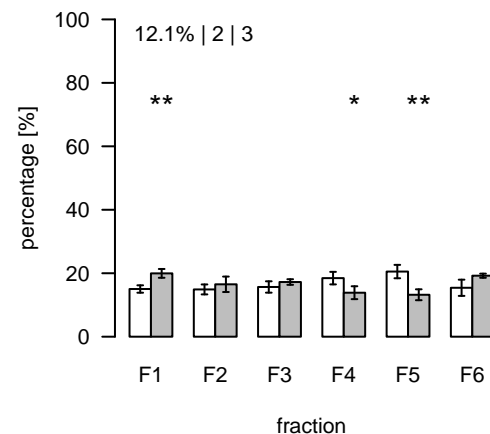

**S799 (m/z=391.285253; rt=16.49152)**  
T/S Cluster: S-16.5-3

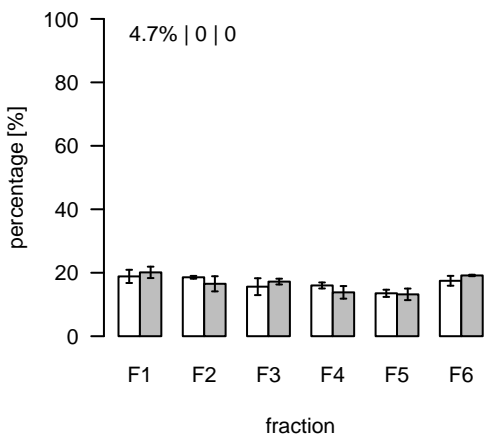

**S798 (m/z=391.276192; rt=16.49125)**  
T/S Cluster: S-16.5-3

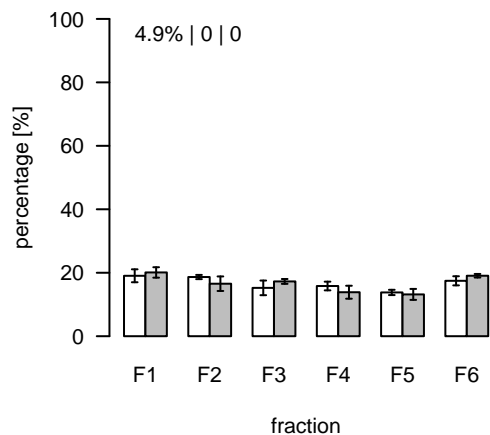

**S800 (m/z=413.267181; rt=16.49196)**  
T/S Cluster: S-16.5-4

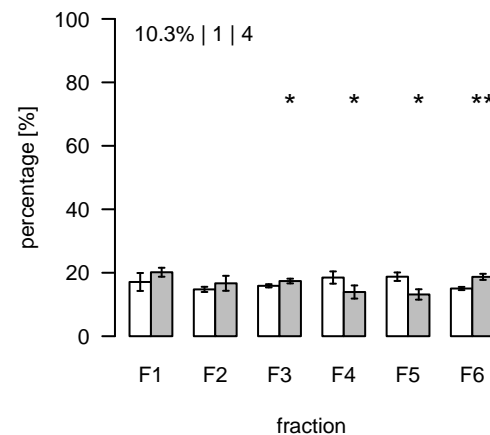

**S801 (m/z=392.288689; rt=16.49223)**  
T/S Cluster: S-16.5-5

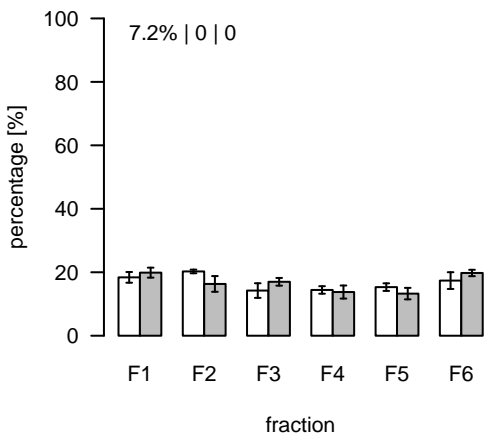

**S802 (m/z=429.241105; rt=16.49238)**  
T/S Cluster: S-16.5-6

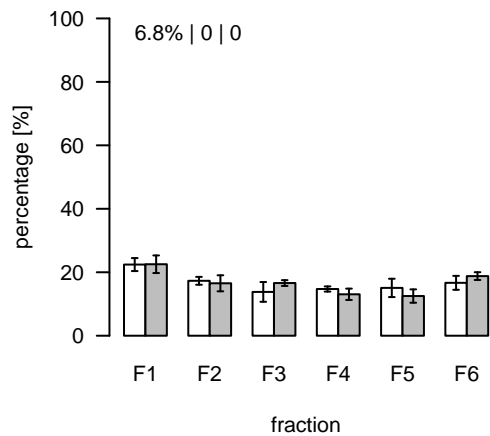

**S803 (m/z=190.050041; rt=16.49253)**  
T/S Cluster: S-16.5-7

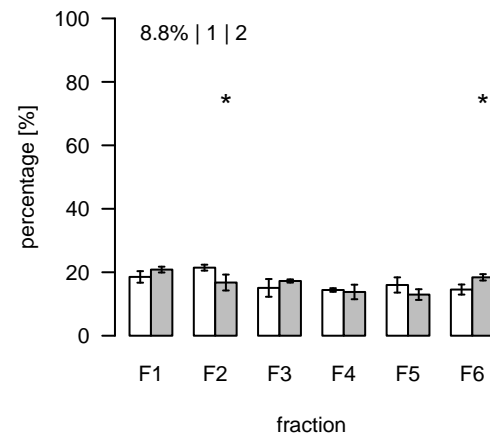



**S805 (m/z=313.274143; rt=16.51683)**  
T/S Cluster: S-16.5-8

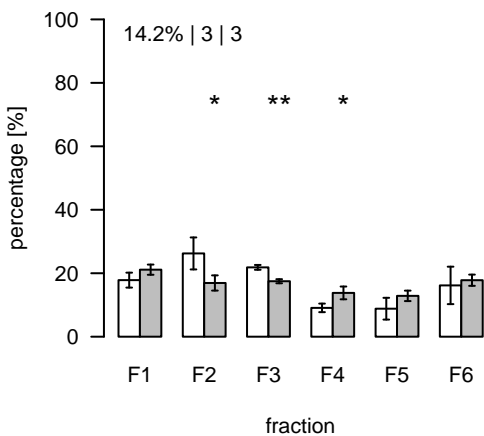

**S806 (m/z=437.776845; rt=16.52788)**  
T/S Cluster: S-16.5-9

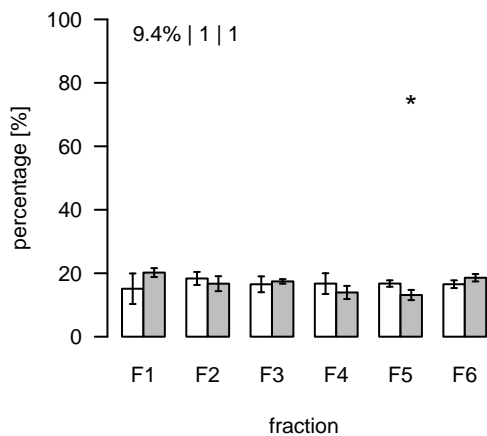

**S837 (m/z=764.533664; rt=16.57449)**  
T/S Cluster: S-16.6-1

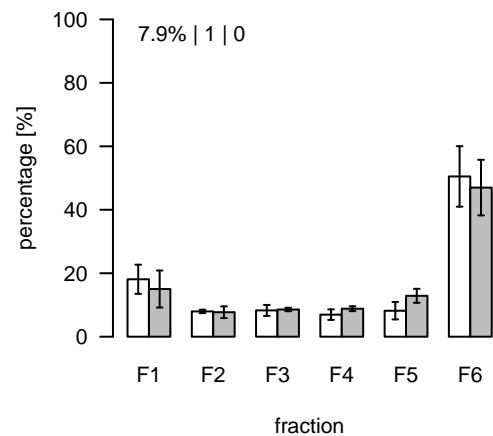

**S831 (m/z=765.537908; rt=16.57431)**  
T/S Cluster: S-16.6-1

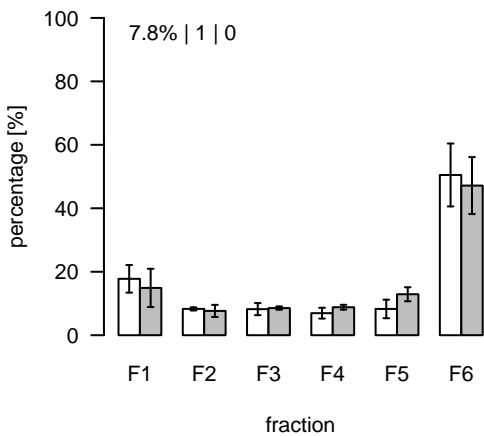

**S832 (m/z=765.538344; rt=16.57432)**  
T/S Cluster: S-16.6-1

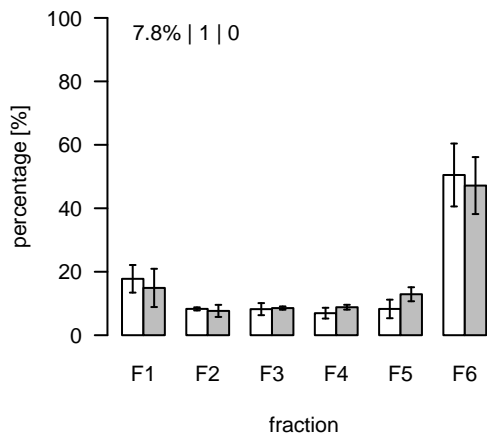

**S825 (m/z=585.45367; rt=16.57407)**  
T/S Cluster: S-16.6-1

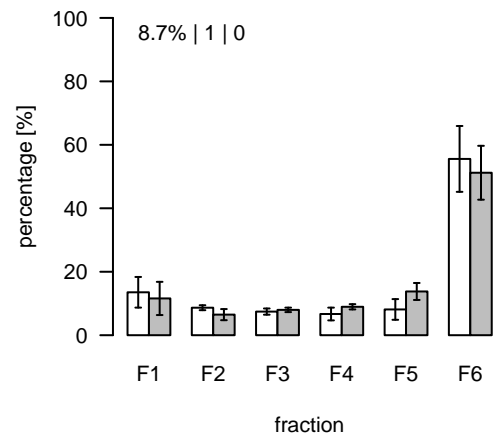

**S836 (m/z=382.267826; rt=16.57445)**  
T/S Cluster: S-16.6-1

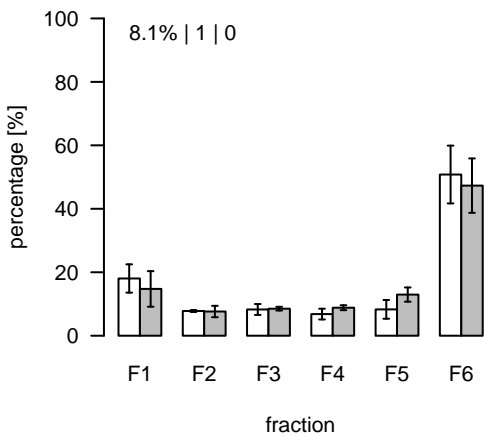

**S823 (m/z=766.538433; rt=16.57395)**  
T/S Cluster: S-16.6-1

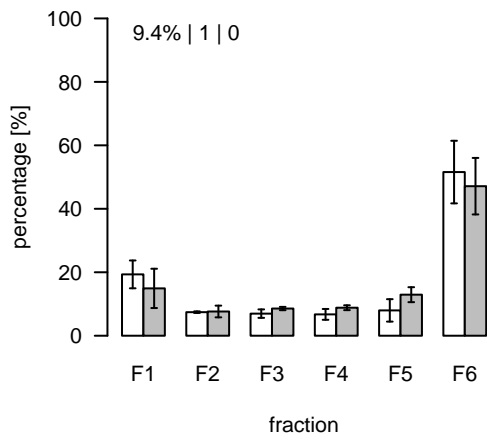

**S824 (m/z=766.538551; rt=16.57405)**  
T/S Cluster: S-16.6-1

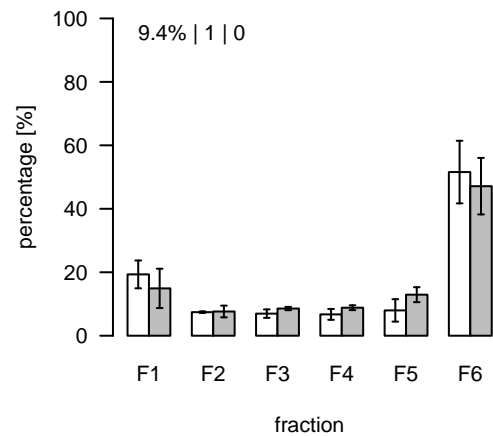

**S822 (m/z=335.25852; rt=16.57366)**  
T/S Cluster: S-16.6-1

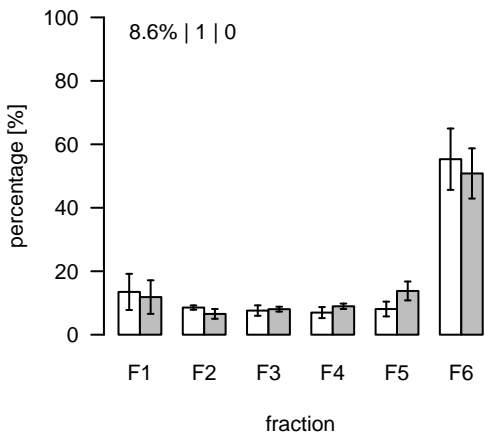

**S844 (m/z=785.463024; rt=16.57796)**  
T/S Cluster: S-16.6-1

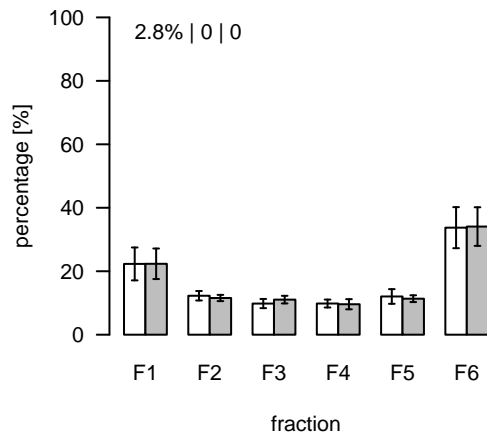

**S838 (m/z=586.457303; rt=16.57453)**  
T/S Cluster: S-16.6-1

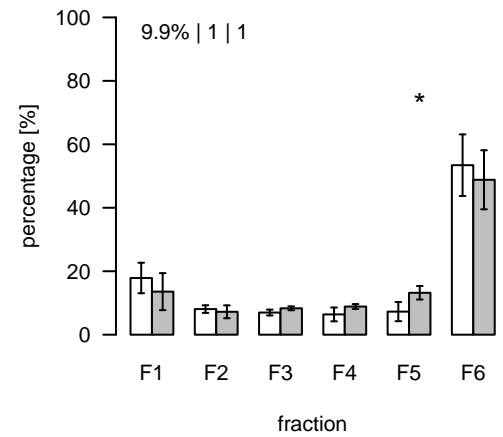

**S829 (m/z=254.848185; rt=16.57421)**  
T/S Cluster: S-16.6-1

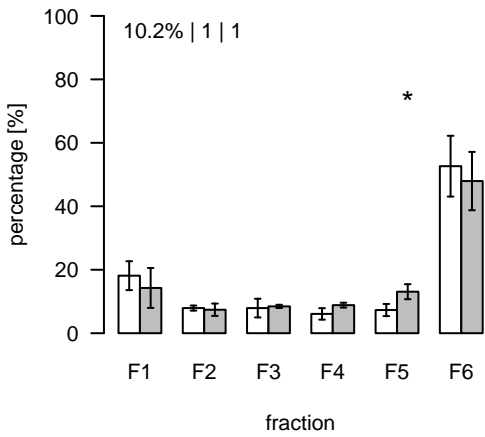

**S839 (m/z=382.769106; rt=16.57454)**  
T/S Cluster: S-16.6-1

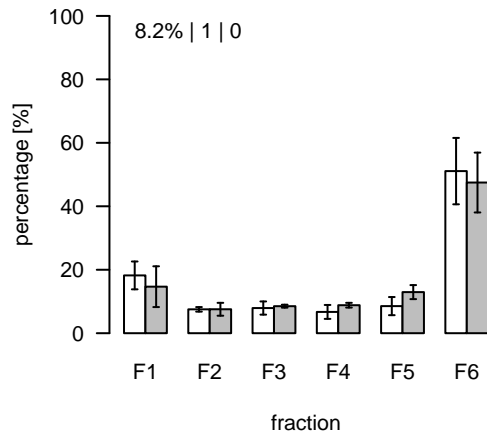

**S840 (m/z=307.227342; rt=16.5747)**  
T/S Cluster: S-16.6-1

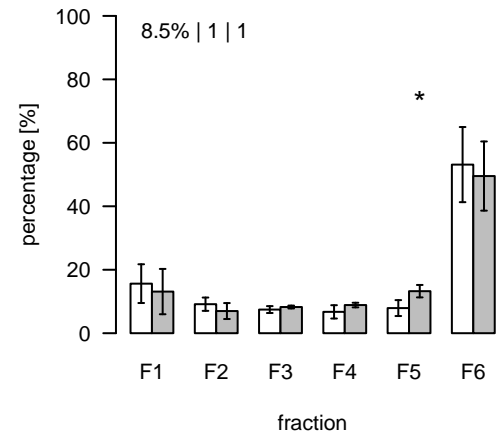

**S828 (m/z=382.774091; rt=16.57421)**  
T/S Cluster: S-16.6-1

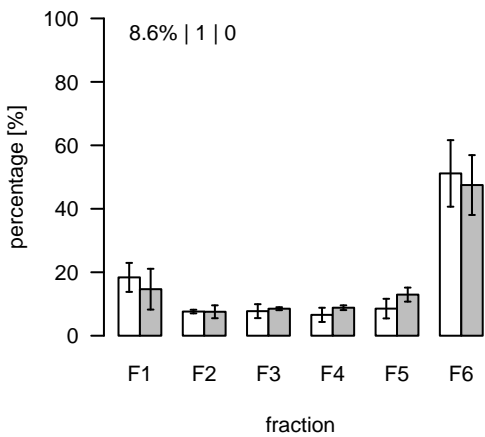

**S833 (m/z=586.439884; rt=16.57441)**  
T/S Cluster: S-16.6-1

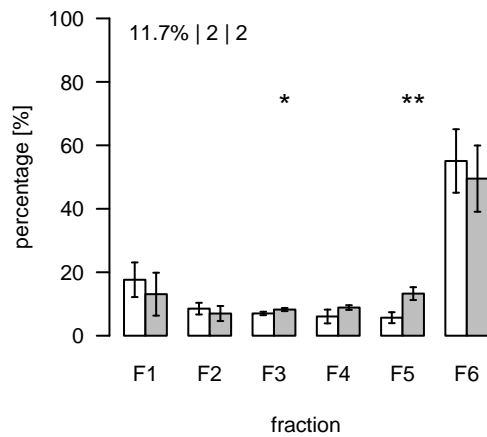

**S830 (m/z=307.221635; rt=16.57427)**  
T/S Cluster: S-16.6-1

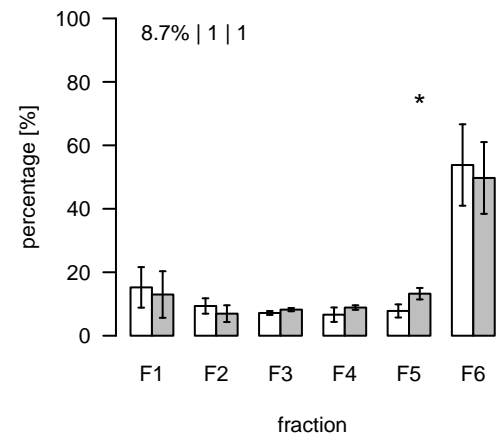

**S826 (m/z=254.842475; rt=16.57411)**  
T/S Cluster: S-16.6-1

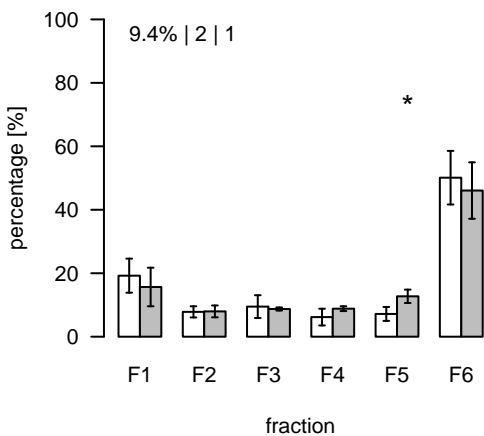

**S807 (m/z=656.510454; rt=16.55376)**  
T/S Cluster: S-16.6-1

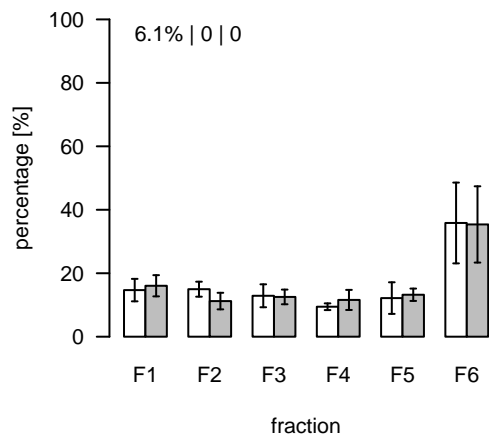

**S814 (m/z=954.61817; rt=16.56921)**  
T/S Cluster: S-16.6-2

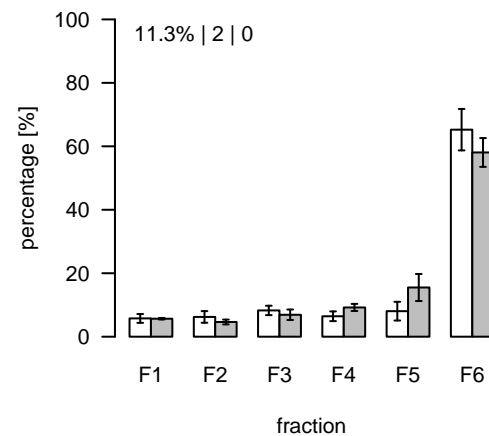

**S813 (m/z=955.622339; rt=16.56913)**  
T/S Cluster: S-16.6-2

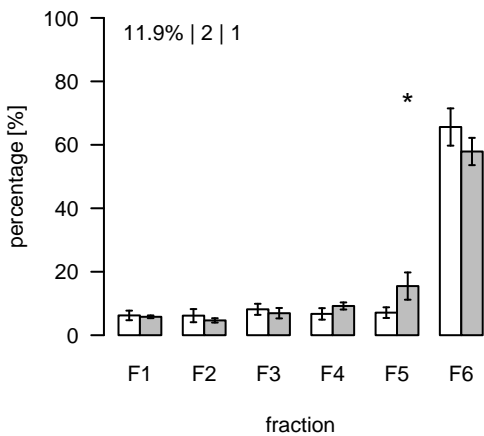

**S810 (m/z=956.625224; rt=16.56859)**  
T/S Cluster: S-16.6-2

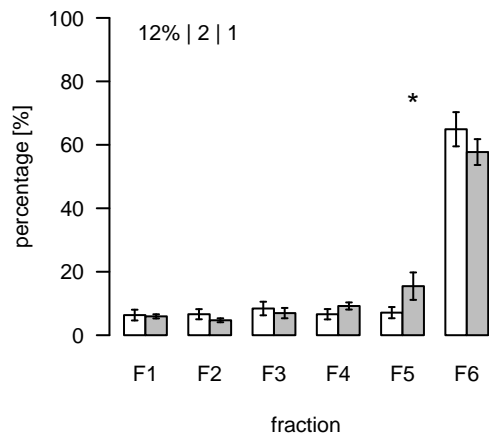

**S812 (m/z=477.311145; rt=16.569)**  
T/S Cluster: S-16.6-2

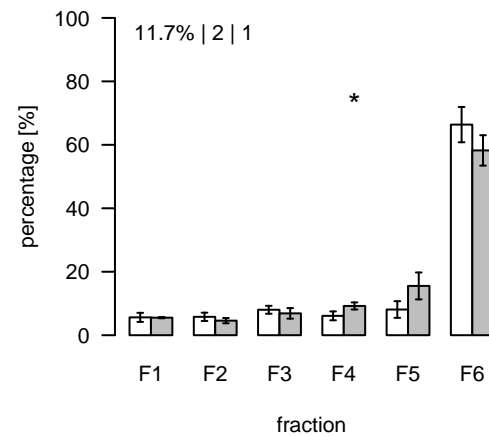

**S815 (m/z=477.813045; rt=16.56936)**  
T/S Cluster: S-16.6-2

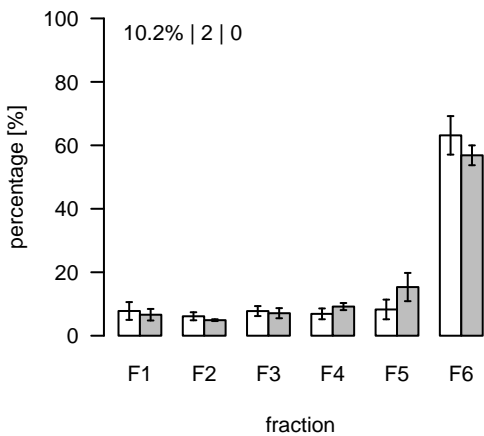

**S818 (m/z=957.627932; rt=16.57017)**  
T/S Cluster: S-16.6-2

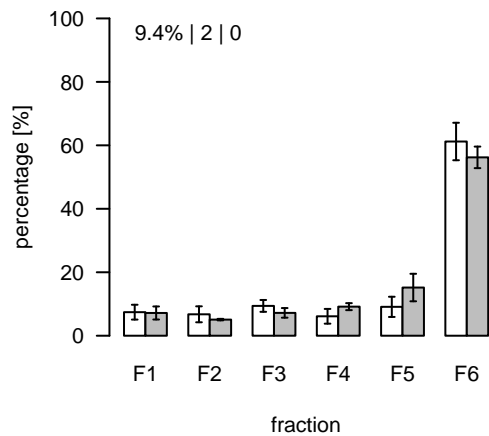

**S809 (m/z=613.485384; rt=16.56842)**  
T/S Cluster: S-16.6-2

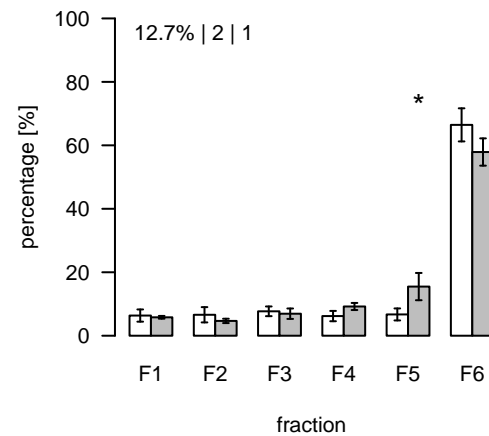

**S816** (m/z=318.21193; rt=16.5695)  
T/S Cluster: S-16.6-2

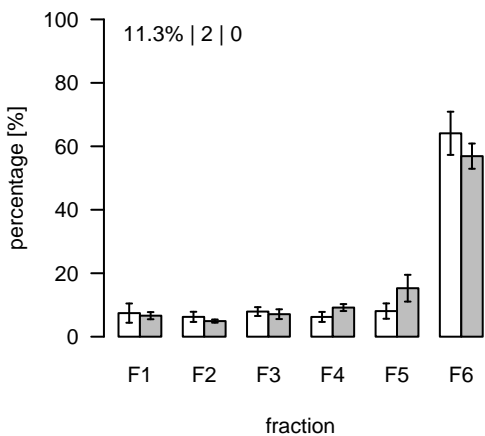

**S808** (m/z=613.456524; rt=16.56719)  
T/S Cluster: S-16.6-2

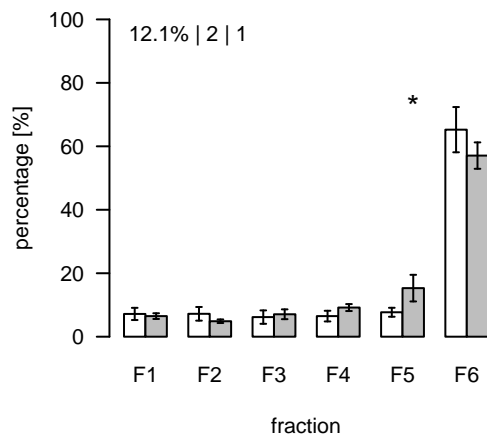

**S811** (m/z=478.324135; rt=16.56897)  
T/S Cluster: S-16.6-3

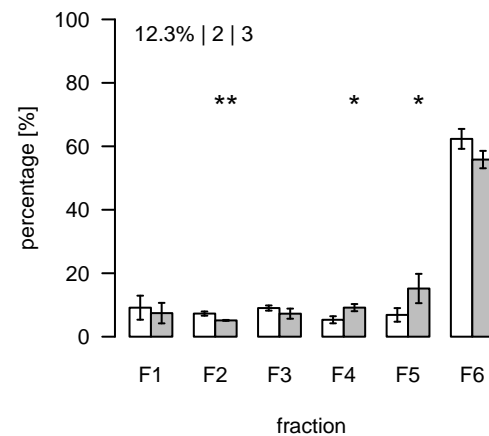

**S817** (m/z=478.313321; rt=16.56961)  
T/S Cluster: S-16.6-3

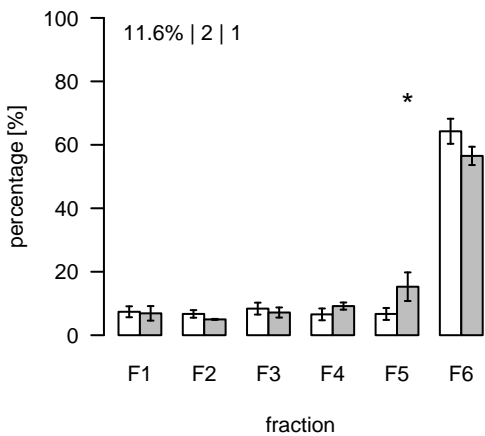

**S819** (m/z=335.249923; rt=16.57226)  
T/S Cluster: S-16.6-4

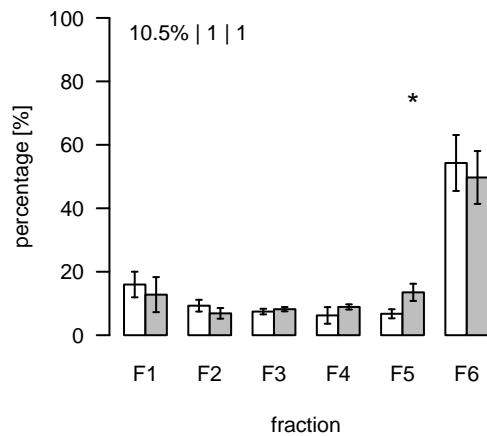

**S820** (m/z=959.574563; rt=16.57241)  
T/S Cluster: S-16.6-5

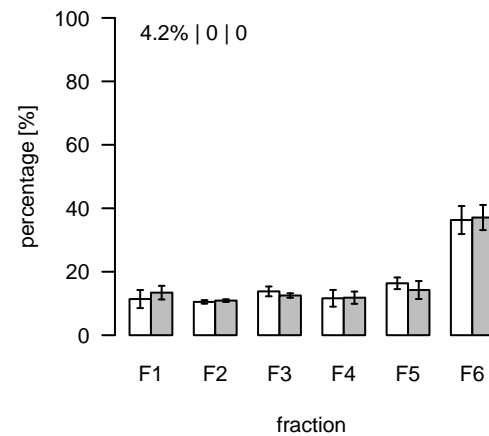

**S841** (m/z=960.578531; rt=16.5754)  
T/S Cluster: S-16.6-5

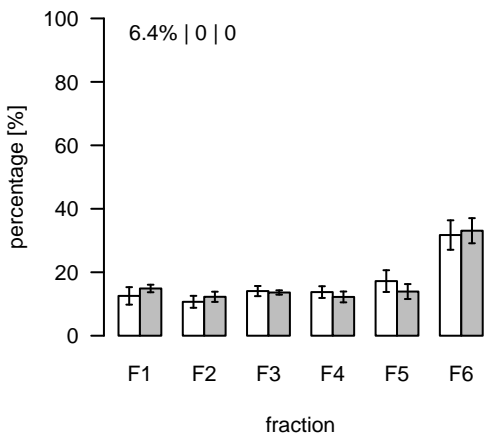

**S821** (m/z=975.547413; rt=16.57312)  
T/S Cluster: S-16.6-5

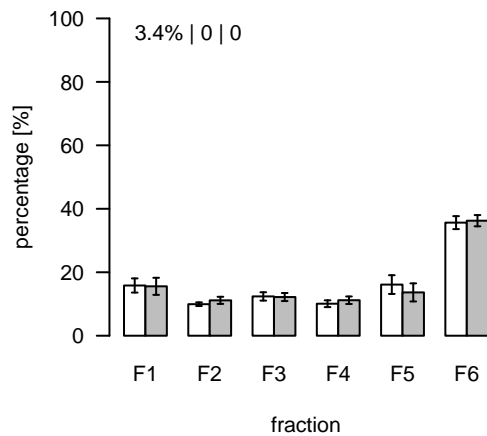

**S834** (m/z=767.542374; rt=16.57443)  
T/S Cluster: S-16.6-6

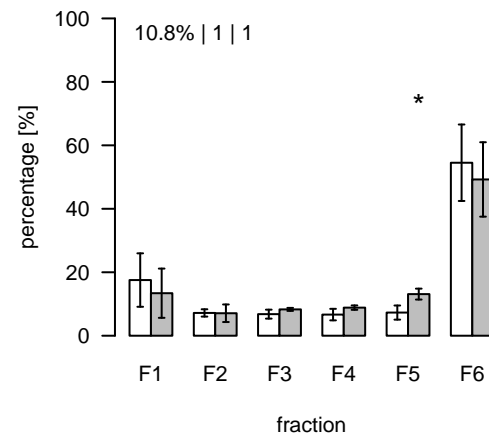

**S835 (m/z=767.542912; rt=16.57445)**  
T/S Cluster: S-16.6-6

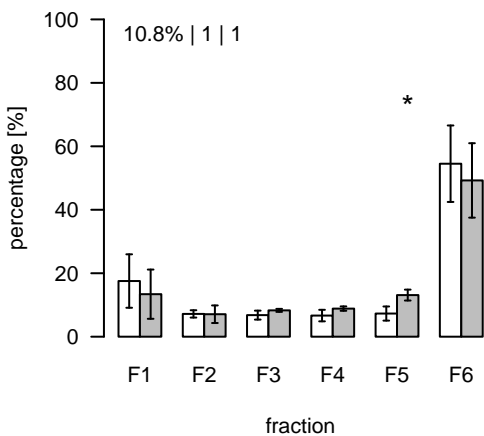

**S827 (m/z=767.51666; rt=16.57419)**  
T/S Cluster: S-16.6-6

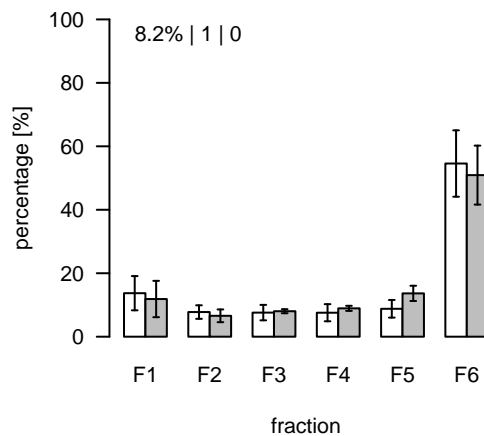

**S842 (m/z=769.489805; rt=16.5778)**  
T/S Cluster: S-16.6-7

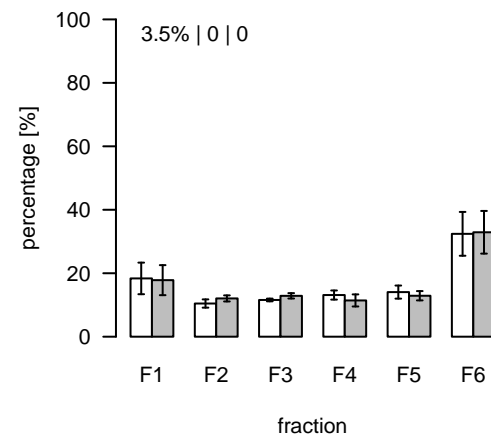

**S843 (m/z=770.493194; rt=16.57789)**  
T/S Cluster: S-16.6-7

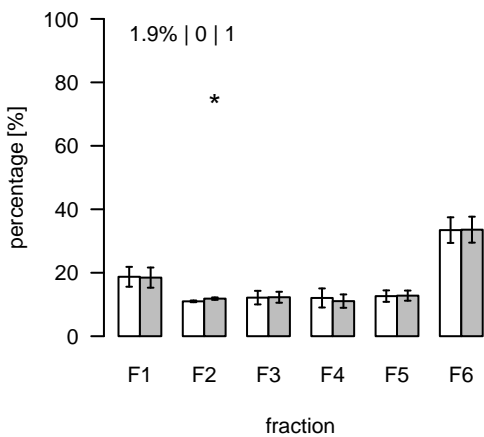

**S845 (m/z=437.732862; rt=16.65029)**  
T/S Cluster: S-16.7-1

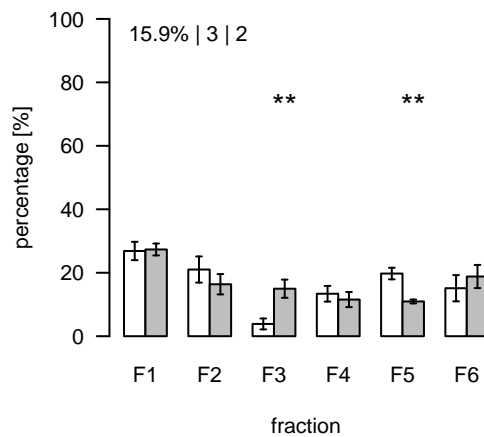

**S846 (m/z=716.566144; rt=16.65953)**  
T/S Cluster: S-16.7-2

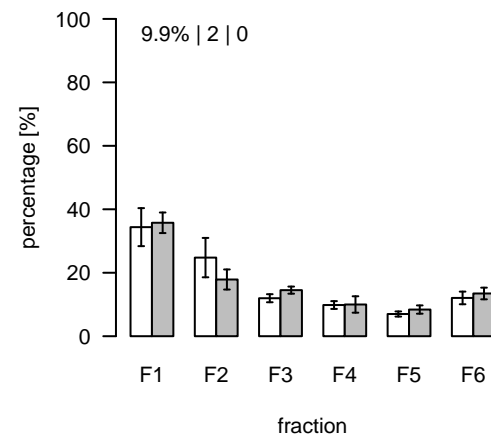

**S847 (m/z=716.5699; rt=16.65967)**  
T/S Cluster: S-16.7-2

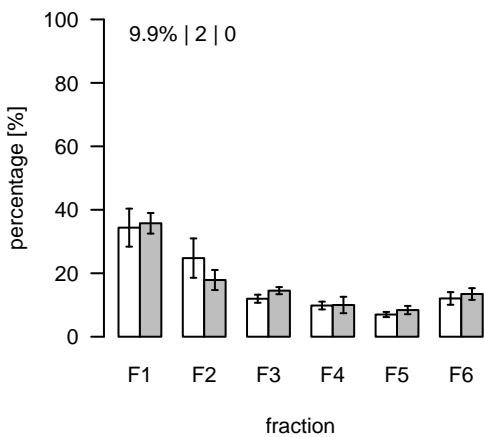

**S849 (m/z=520.438529; rt=16.80008)**  
T/S Cluster: S-16.8-1

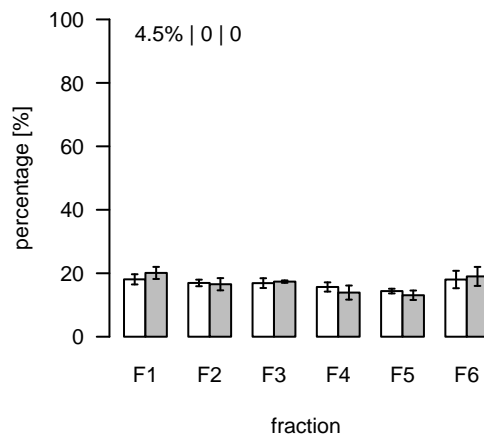

**S848 (m/z=520.427378; rt=16.7997)**  
T/S Cluster: S-16.8-1

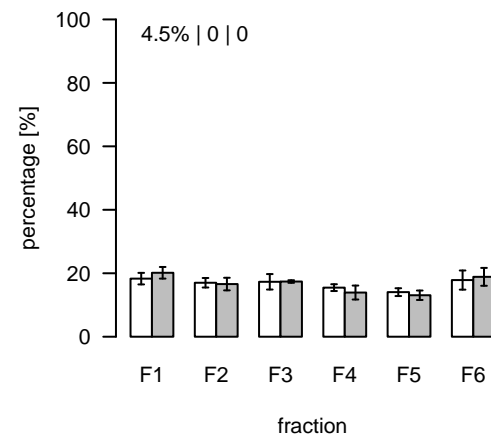

**S850 (m/z=520.437709; rt=16.84106)**  
T/S Cluster: S-16.8-2

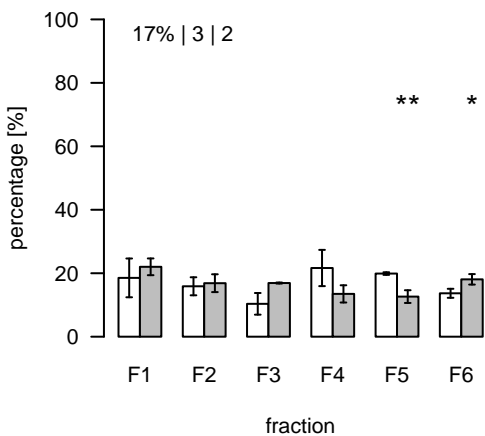

**S851 (m/z=591.500321; rt=16.92361)**  
T/S Cluster: S-16.9-1

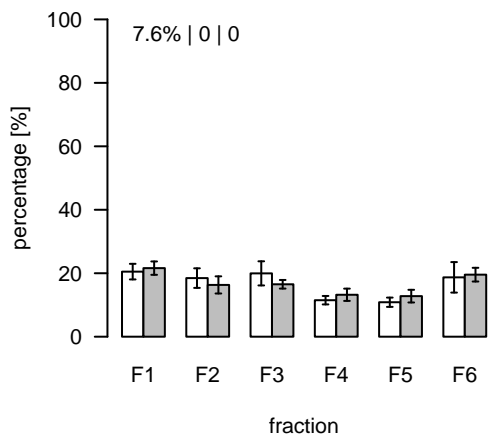

**S852 (m/z=1194.826114; rt=16.95159)**  
T/S Cluster: S-17-1

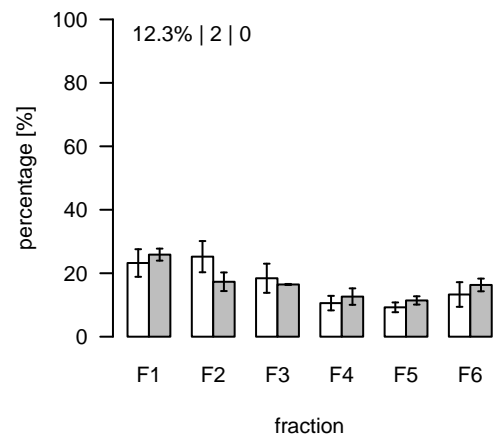

**S853 (m/z=1195.828816; rt=16.95195)**  
T/S Cluster: S-17-1

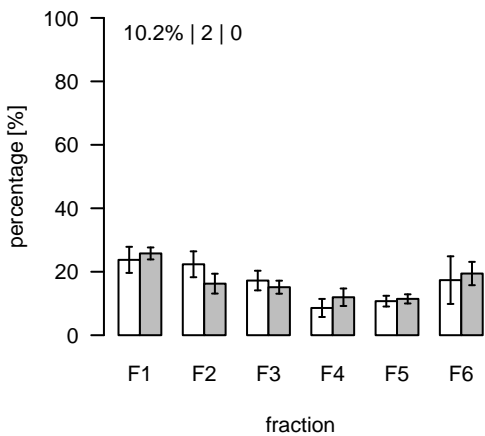

**S854 (m/z=954.618844; rt=16.96745)**  
T/S Cluster: S-17-2

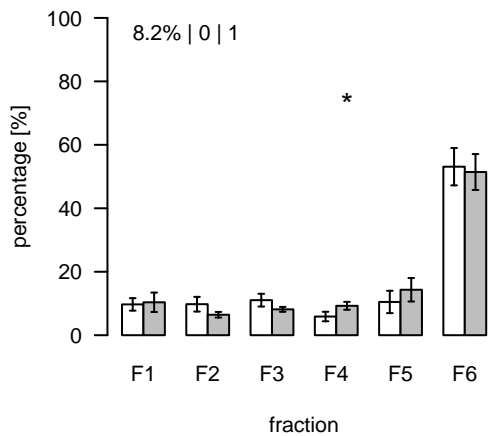

**S855 (m/z=955.622974; rt=16.96837)**  
T/S Cluster: S-17-2

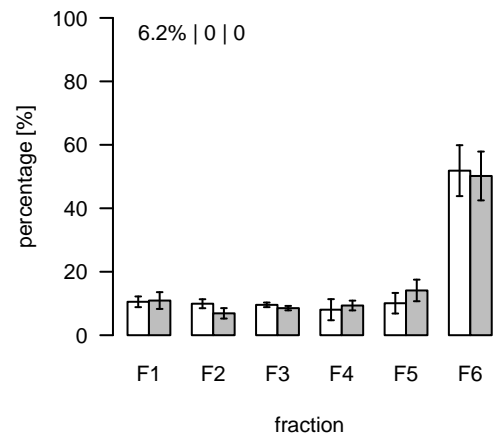

**S862 (m/z=743.488757; rt=16.97627)**  
T/S Cluster: S-17-3

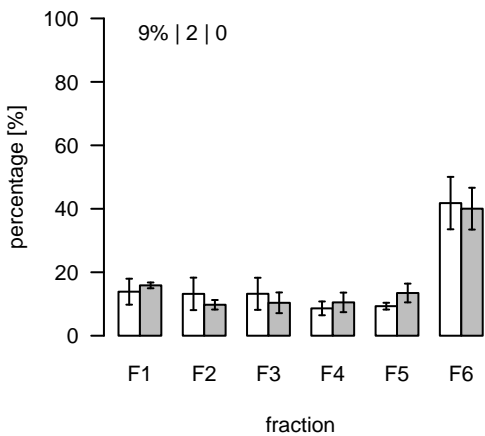

**S863 (m/z=571.474407; rt=16.97644)**  
T/S Cluster: S-17-3

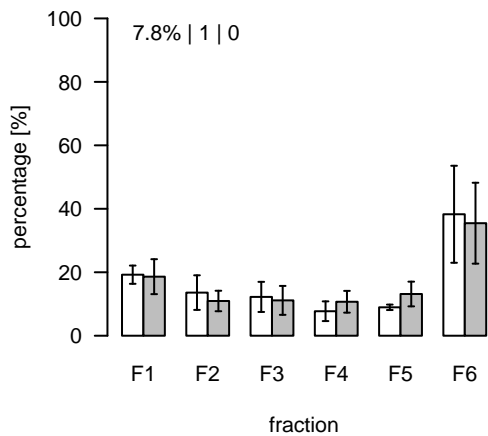

**S861 (m/z=760.515728; rt=16.97621)**  
T/S Cluster: S-17-3

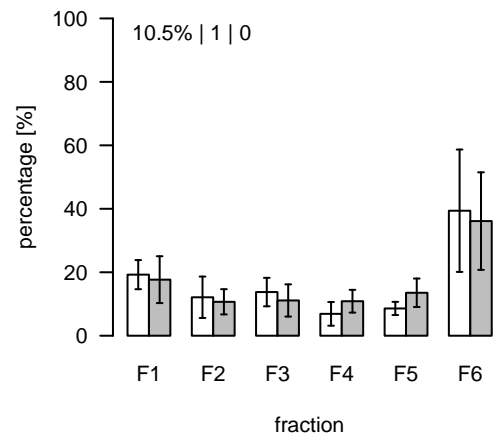

**S867 (m/z=744.491173; rt=16.97866)**  
T/S Cluster: S-17-3

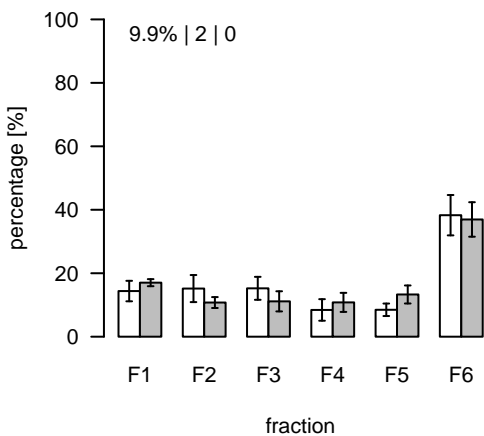

**S865 (m/z=761.521318; rt=16.97756)**  
T/S Cluster: S-17-3

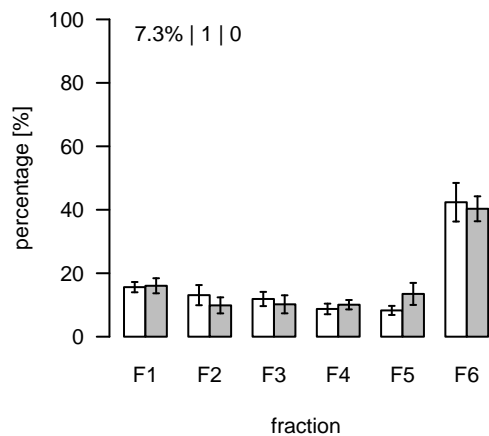

**S856 (m/z=834.542534; rt=16.9692)**  
T/S Cluster: S-17-3

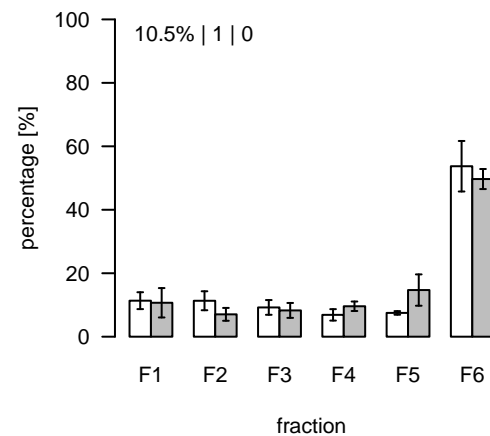

**S860 (m/z=571.452411; rt=16.97576)**  
T/S Cluster: S-17-3

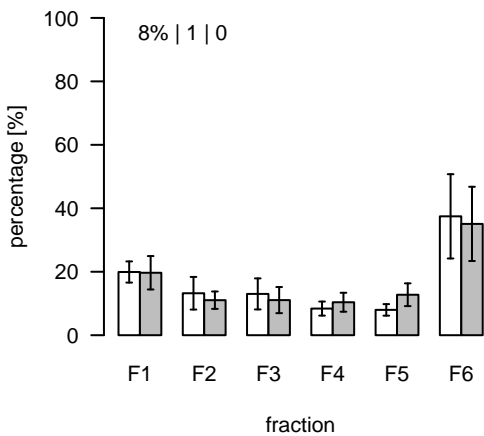

**S866 (m/z=572.477637; rt=16.9785)**  
T/S Cluster: S-17-3

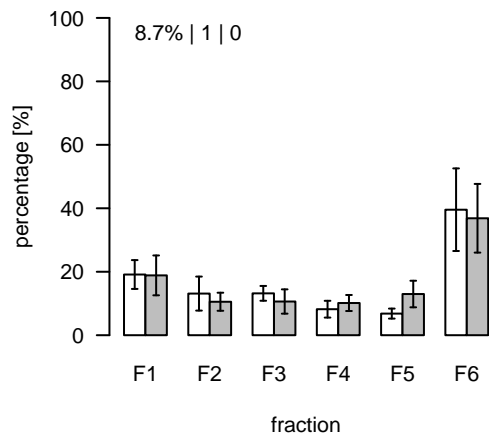

**S857 (m/z=762.531671; rt=16.97441)**  
T/S Cluster: S-17-4

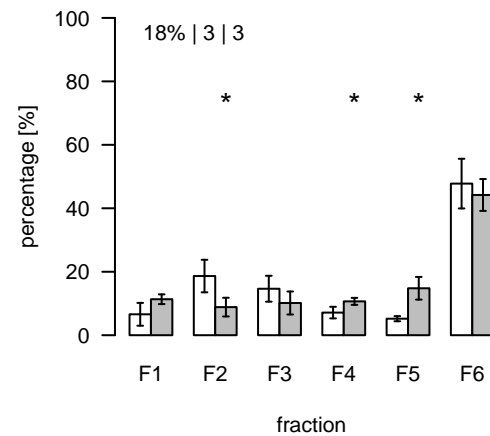

**S858 (m/z=745.505123; rt=16.97462)**  
T/S Cluster: S-17-4

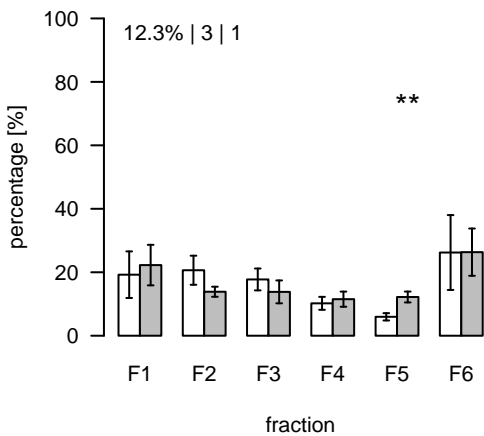

**S859 (m/z=759.486218; rt=16.97548)**  
T/S Cluster: S-17-5

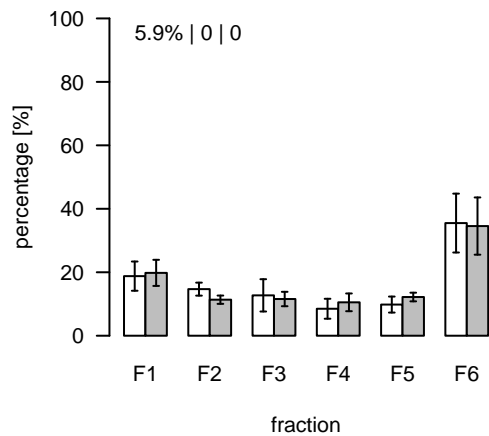

**S869 (m/z=741.476035; rt=16.9814)**  
T/S Cluster: S-17-5

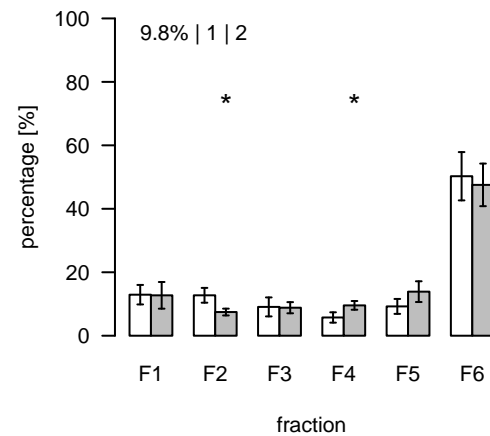

**S864 (m/z=764.547829; rt=16.9773)**  
T/S Cluster: S-17-6

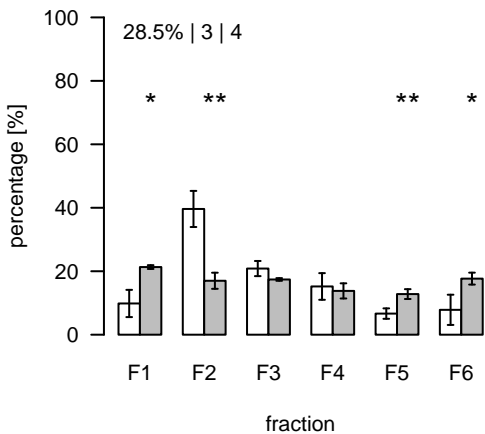

**S872 (m/z=573.490056; rt=16.98399)**  
T/S Cluster: S-17-7

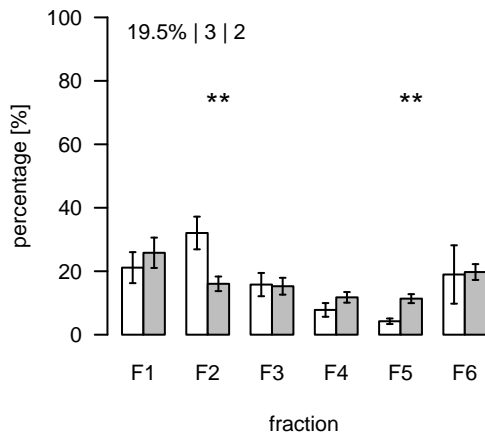

**S868 (m/z=765.541534; rt=16.97956)**  
T/S Cluster: S-17-7

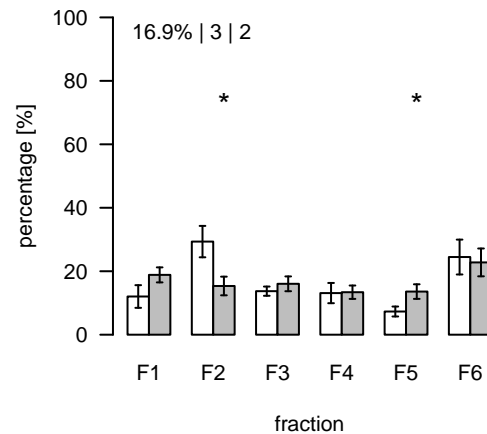

**S870 (m/z=766.564039; rt=16.98173)**  
T/S Cluster: S-17-8

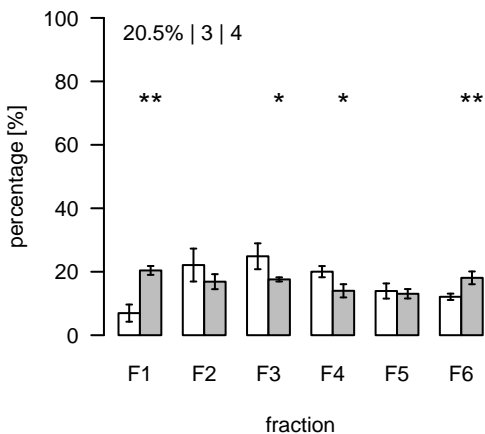

**S871 (m/z=766.56182; rt=16.98194)**  
T/S Cluster: S-17-8

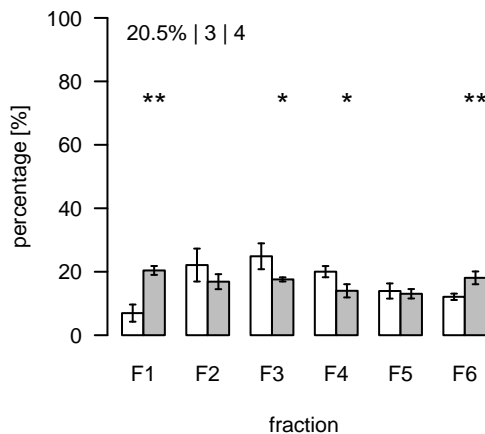

**S873 (m/z=774.565713; rt=16.98635)**  
T/S Cluster: S-17-9

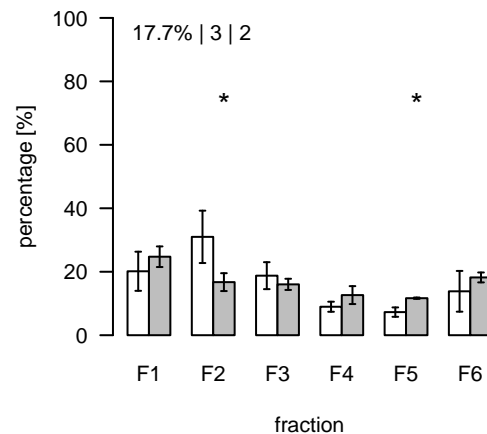

**S874 (m/z=577.521396; rt=16.98764)**  
T/S Cluster: S-17-10

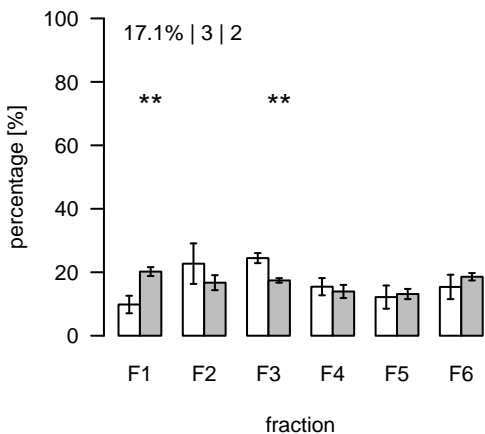

**S875 (m/z=835.541657; rt=16.98974)**  
T/S Cluster: S-17-11

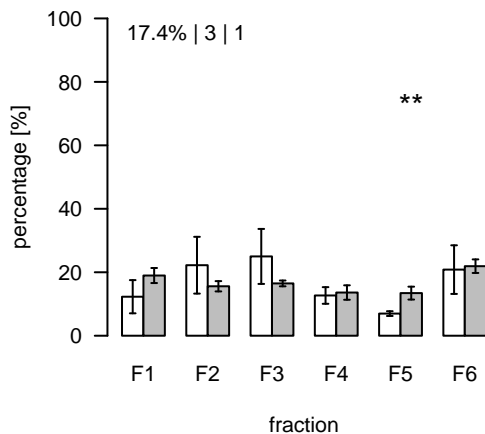

**S876 (m/z=575.505854; rt=16.99119)**  
T/S Cluster: S-17-12

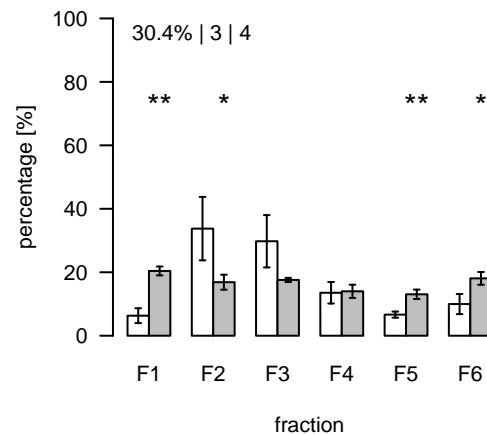



**S878 (m/z=760.586698; rt=16.99649)**  
T/S Cluster: S-17-13

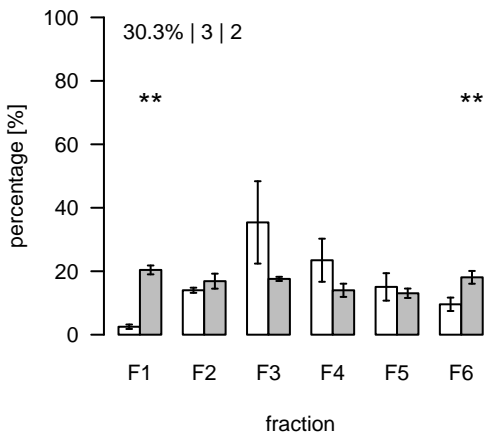

**S879 (m/z=761.589933; rt=16.99719)**  
T/S Cluster: S-17-13

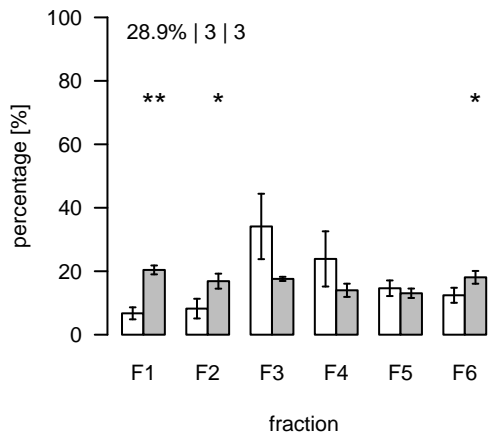

**S877 (m/z=786.602989; rt=16.9951)**  
T/S Cluster: S-17-13

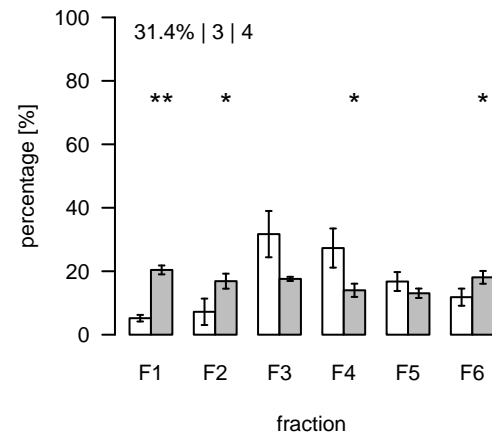

**S880 (m/z=714.509132; rt=16.99751)**  
T/S Cluster: S-17-14

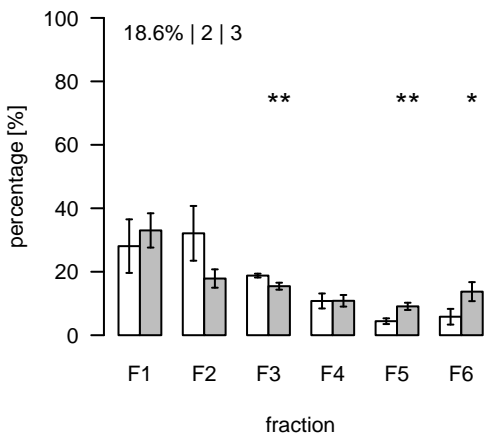

**S881 (m/z=716.525504; rt=16.99825)**  
T/S Cluster: S-17-15

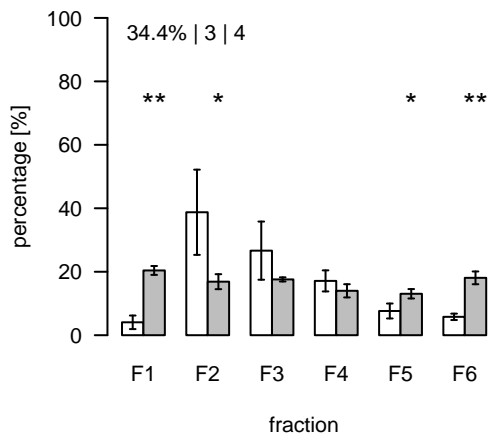

**S883 (m/z=717.528996; rt=16.99959)**  
T/S Cluster: S-17-15

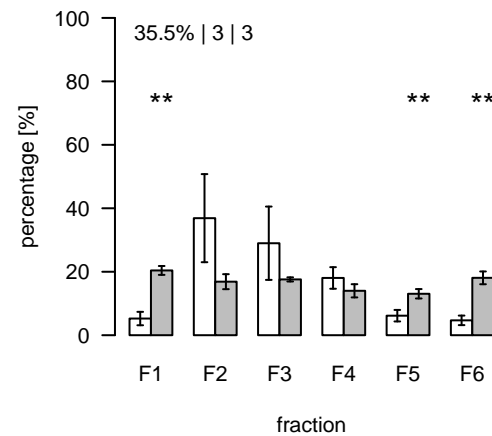

**S882 (m/z=768.558224; rt=16.99875)**  
T/S Cluster: S-17-16

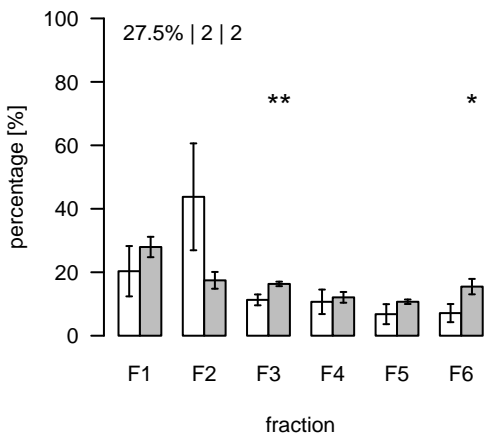

**S885 (m/z=718.539452; rt=17.00661)**  
T/S Cluster: S-17-17

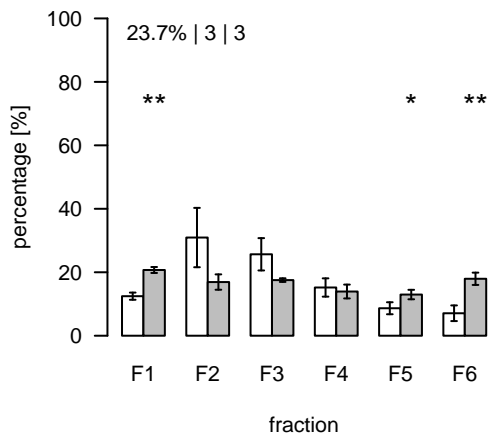

**S892 (m/z=788.546257; rt=17.04346)**  
T/S Cluster: S-17-17

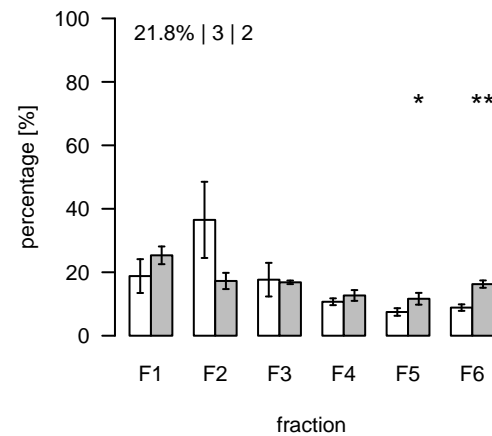

**S884 (m/z=744.556393; rt=17.00044)**  
T/S Cluster: S-17-17

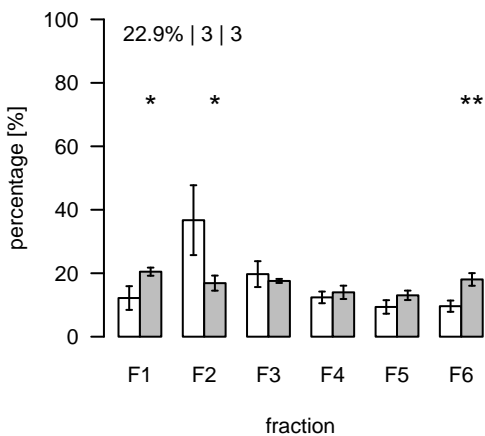

**S886 (m/z=823.709427; rt=17.00761)**  
T/S Cluster: S-17-18

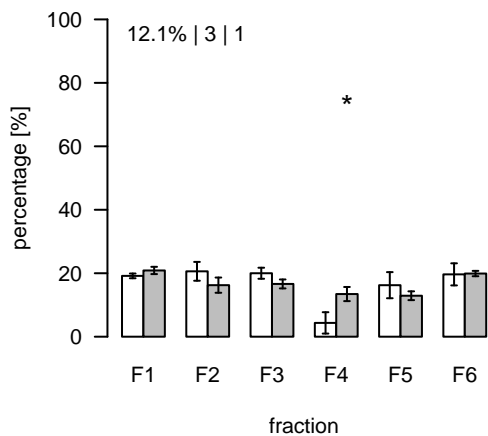

**S887 (m/z=836.544996; rt=17.03184)**  
T/S Cluster: S-17-19

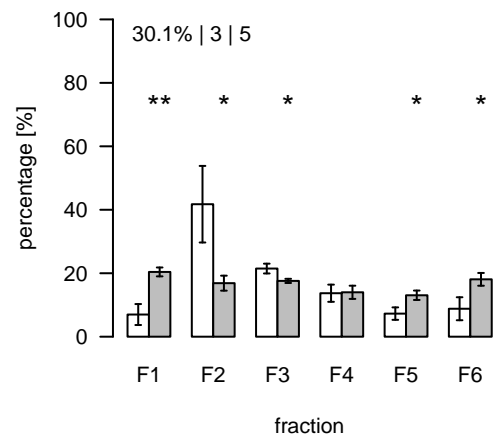

**S888 (m/z=837.550518; rt=17.03846)**  
T/S Cluster: S-17-19

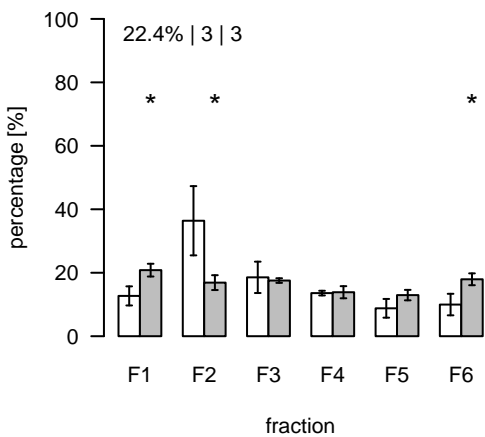

**S890 (m/z=838.560611; rt=17.04066)**  
T/S Cluster: S-17-20

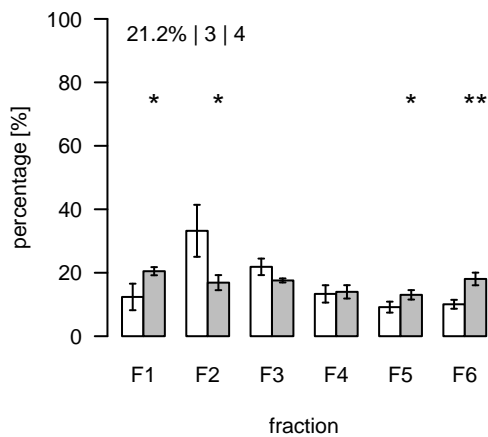

**S891 (m/z=838.556171; rt=17.04127)**  
T/S Cluster: S-17-20

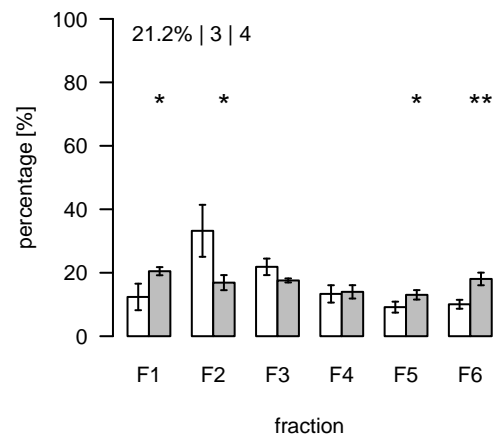

**S889 (m/z=838.579186; rt=17.03893)**  
T/S Cluster: S-17-20

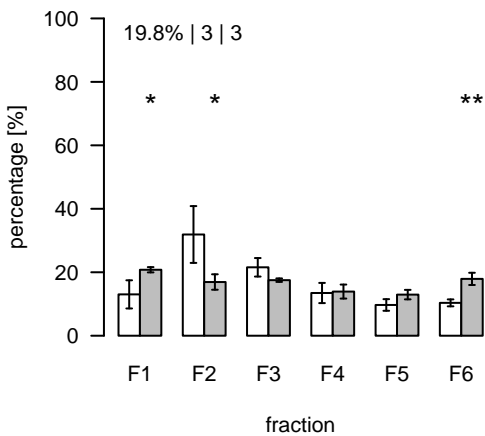

**S893 (m/z=812.545924; rt=17.04677)**  
T/S Cluster: S-17-21

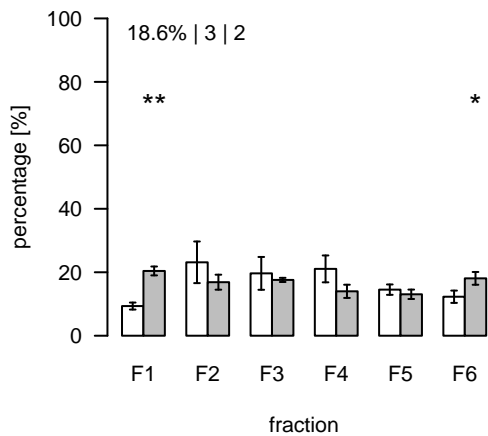

**S894 (m/z=840.576771; rt=17.05003)**  
T/S Cluster: S-17.1-1

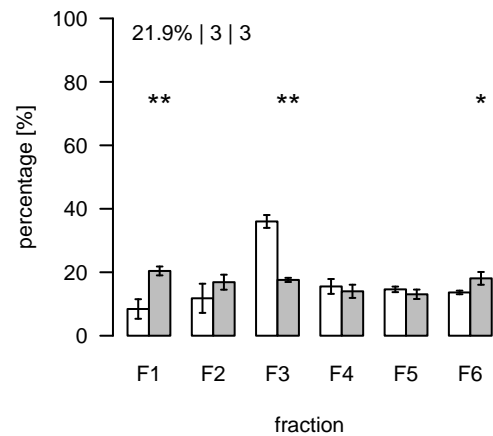

**S895 (m/z=790.562207; rt=17.0583)**  
T/S Cluster: S-17.1-2

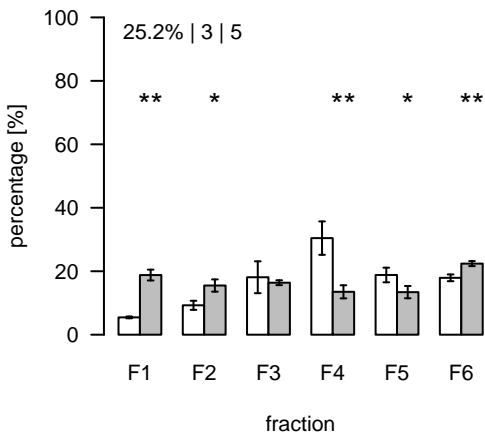

**S896 (m/z=791.566109; rt=17.0594)**  
T/S Cluster: S-17.1-2

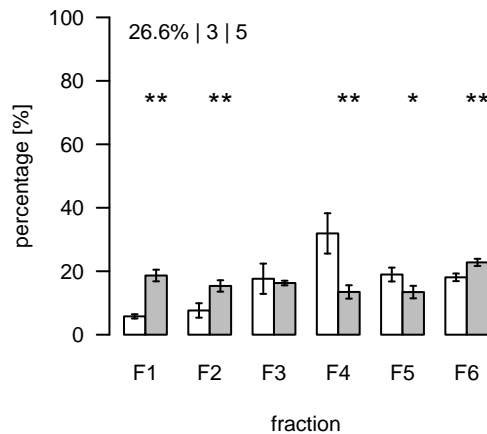

**S897 (m/z=437.760659; rt=17.1805)**  
T/S Cluster: S-17.2-1

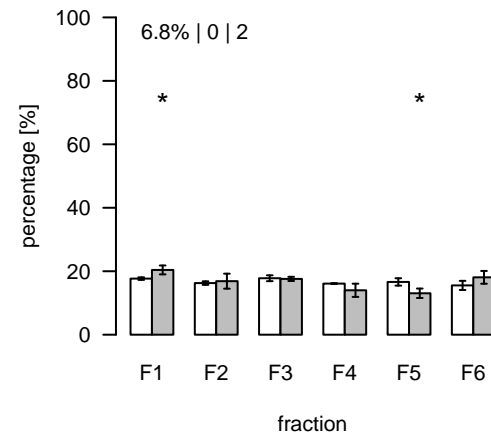

**S898 (m/z=437.784857; rt=17.44804)**  
T/S Cluster: S-17.4-1

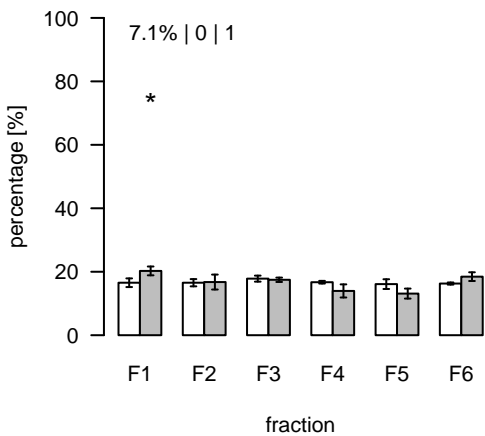

**S899 (m/z=222.295543; rt=17.44805)**  
T/S Cluster: S-17.4-2

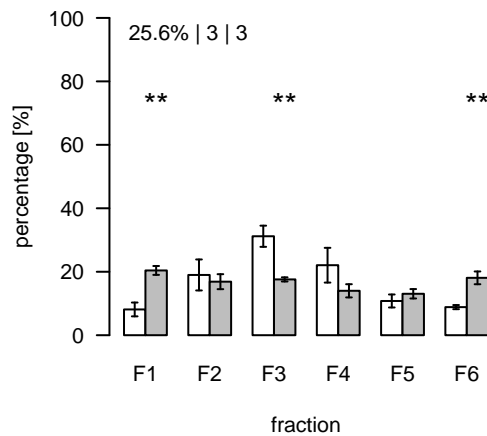

**S900 (m/z=437.73078; rt=17.80401)**  
T/S Cluster: S-17.8-1

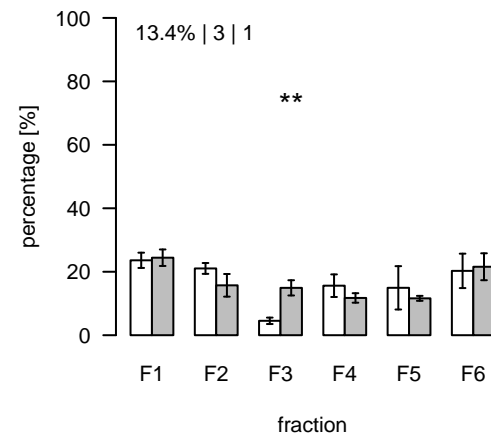

**S901 (m/z=437.764809; rt=17.86007)**  
T/S Cluster: S-17.9-1

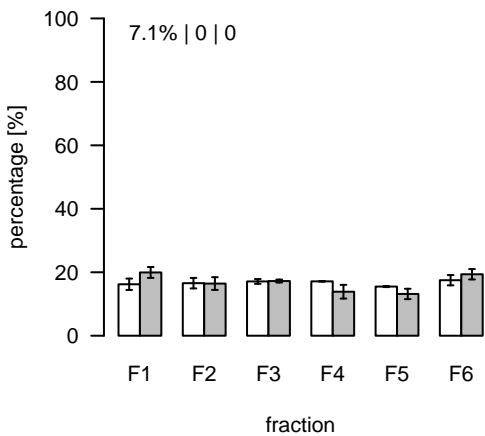

**S902 (m/z=823.737916; rt=18.18814)**  
T/S Cluster: S-18.2-1

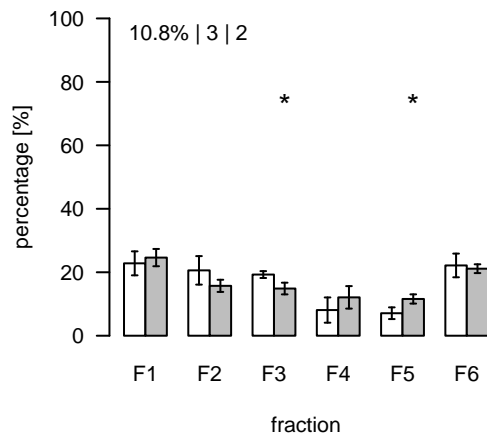

**S903 (m/z=231.116434; rt=18.42138)**  
T/S Cluster: S-18.4-1

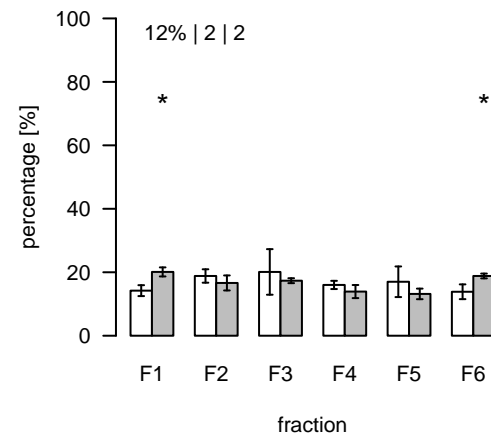

**S904 (m/z=437.744309; rt=18.42782)**  
T/S Cluster: S-18.4-2

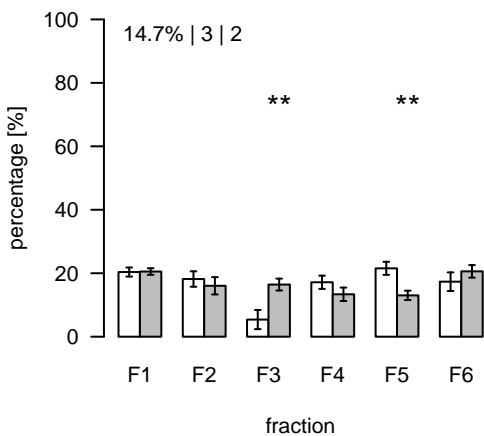

**S905 (m/z=214.089699; rt=18.4286)**  
T/S Cluster: S-18.4-3

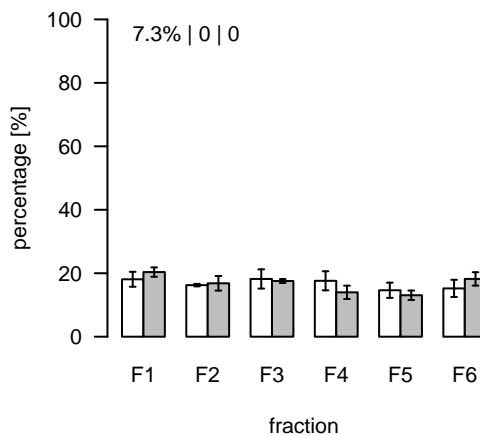

**S906 (m/z=158.027039; rt=18.48103)**  
T/S Cluster: S-18.5-1

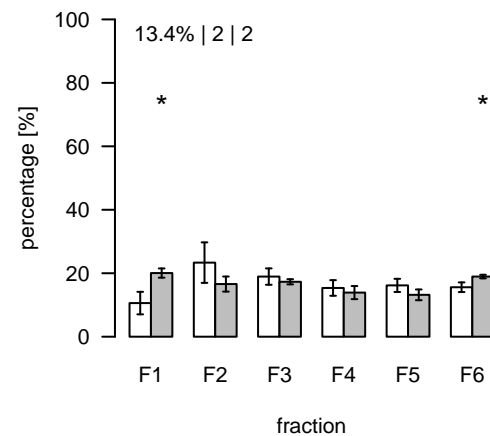

**S907 (m/z=141.000467; rt=18.52528)**  
T/S Cluster: S-18.5-2

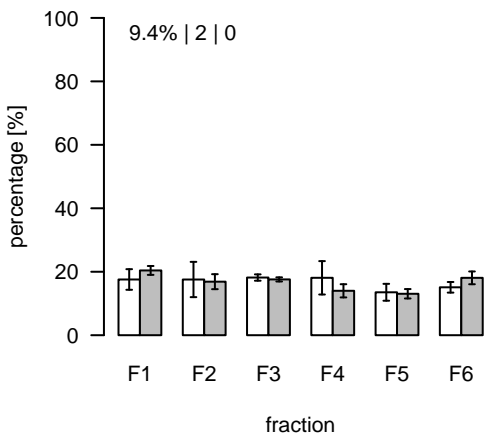

**S908 (m/z=823.711869; rt=18.53472)**  
T/S Cluster: S-18.5-3

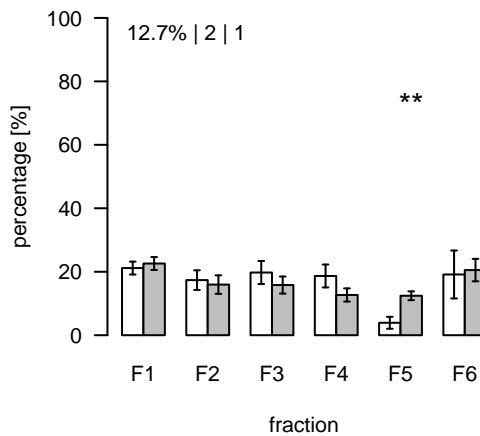

**S909 (m/z=437.753722; rt=18.68041)**  
T/S Cluster: S-18.7-1

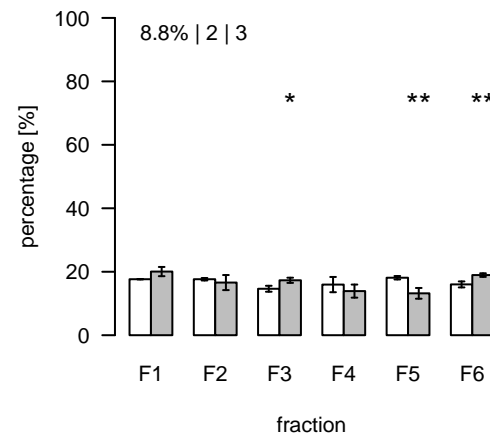

**S910 (m/z=437.777035; rt=19.02028)**  
T/S Cluster: S-19-1

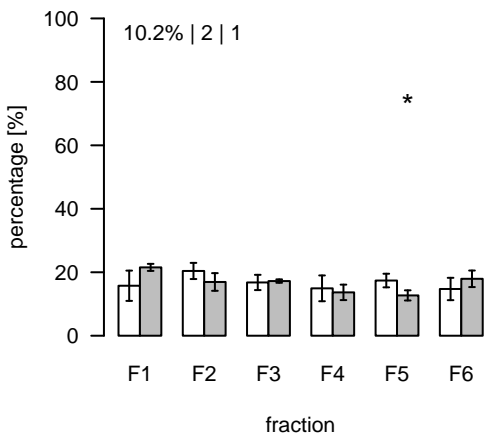

Supplement: pone.0017806.s013.pdf [file pone.0017806.s013.pdf]
