# Supplementary material for: A Topological Map of the Compartmentalized Arabidopsis thaliana Leaf Metabolome
Source: PLoS One. 2011 Mar 15;6(3):e17806. doi: 10.1371/journal.pone.0017806 (PMC3058050; doi:10.1371/journal.pone.0017806)
Supplement: Data S4 — Fused metabolome data set covering analyte annotations as well as results of estimated subcellular distributions and compartmental assignments. (XLS) [file pone.0017806.s012.xls]

## Sheet: data
		Fused and Scaled Dataset
	Fraction	F1			F2			F3			F4			F5			F6
	Gradient	1	2	3	1	2	3	1	2	3	1	2	3	1	2	3	1	2	3
#	AnalyteID	F1.G1	F1.G2	F1.G3	F2.G1	F2.G2	F2.G3	F3.G1	F3.G2	F3.G3	F4.G1	F4.G2	F4.G3	F5.G1	F5.G2	F5.G3	F6.G1	F6.G2	F6.G3
1	Marker#1: GAPDH (cpl.)	7.03694	4.75908	4.82174	3.99938	5.19275	4.23051	5.98143	2.77596	5.07163	6.2222	7.0021	6.88286	9.94429	16.9539	8.83988	66.8158	63.3162	70.1534
2	Marker#1.1: starch (cpl.)	3.3676	3.78499	2.94626	4.51208	3.9465	2.48779	10.356	6.85357	5.60316	11.9765	12.0383	10.7779	16.1999	26.2258	16.6592	53.5879	47.1509	61.5257
3	Marker#1.2: DGDG (cpl.)	6.8304	7.65602	8.58295	6.84699	5.88836	4.20459	9.95256	7.13794	8.23973	6.14656	12.0195	9.91256	14.5283	18.0235	12.4259	55.6952	49.2747	56.6343
4	Marker#2: UGPase (cyt.)	17.2095	19.9704	19.4661	20.2993	15.2048	11.5295	16.0861	16.418	16.4934	12.4054	13.9356	14.1703	10.7884	15.2772	10.8081	23.2114	19.1941	27.5326
5	Marker#2.1: GlcCer (cyt.)	22.1755	23.1366	26.4779	19.9495	16.8364	12.5497	18.7111	14.8131	18.3205	7.35224	15.6895	13.9517	11.4857	13.5957	10.7414	20.326	15.9286	17.9588
6	Marker#2.2: TAG (cyt.)	17.3629	18.786	19.1287	17.0903	19.242	19.1397	19.9267	21.5457	15.9546	15.516	13.4378	19.4907	16.9052	14.7591	13.165	13.199	12.2294	13.1213
7	Marker#3: nitrate (vac.)	41.4918	41.0288	37.6335	19.4207	20.8951	20.9059	11.6907	11.1861	14.9889	9.3913	7.34423	7.68156	8.04717	5.93237	6.41176	9.95834	13.6133	12.3784
8	Marker#3.1: glucosinolates (vac.)	43.9192	54.1582	50.4232	20.6032	16.6034	12.2464	12.2388	11.3952	12.2655	6.2572	6.74131	7.29031	7.08626	4.5646	4.71329	9.89538	6.53731	13.0613
9	Marker#3.2: flavonoids (vac.)	39.4133	46.2388	50.4897	26.6432	18.9271	13.1016	17.2096	15.6057	15.5987	5.46348	10.151	8.93791	4.74796	4.66377	4.41835	6.52246	4.41364	7.45376
10	(ref) (Lactate)-189.5	19.4186	23.6213	20.0494	19.0556	14.265	16.9714	18.6142	12.9485	13.6941	11.9375	13.3406	16.9179	13.0206	15.5912	16.9594	17.9534	20.2334	15.4079
11	(ref) (2-Hydroxypyridine)-204.9	21.9664	22.8488	19.411	25.6482	18.026	18.4809	19.5169	18.4974	12.4407	9.87269	13.0566	15.0665	6.79956	12.6644	13.7616	16.1962	14.9068	20.8393
12	(ref.b) (Alanine)-209.0	18.9372	22.4932	18.0306	21.3597	15.6647	19.5176	19.8463	15.5452	13.5883	11.0203	9.14706	18.3425	9.44615	14.752	13.4162	19.3904	22.3979	17.1049
13	(ref.b) (Pyruvate)-222.7	23.8977	27.1008	26.6249	21.095	13.0879	13.6243	15.6163	12.8584	11.541	8.66739	10.9577	13.6019	8.19075	13.2686	11.757	22.5329	22.7266	22.8508
14	(ref) (2-Hydroxybutyrate)-226.4	18.4506	21.7235	19.0326	21.9111	13.5858	12.8077	17.9606	14.2123	11.1388	10.2899	11.0616	13.985	8.97442	14.2075	13.7544	22.4134	25.2093	29.2815
15	(ref.b) (2-Aminobutyrate)-249.5	19.3247	24.3429	20.8704	21.5727	15.2784	14.8036	17.7928	13.4942	9.6622	9.07707	8.45943	14.2228	7.67258	14.9624	10.9954	24.5602	23.4626	29.4455
16	(ref) (2-Oxobutanoate)-252.6	18.0761	20.9105	17.982	17.9009	12.4965	11.0479	16.5475	11.9465	10.7448	7.88047	11.4424	13.1668	7.36098	14.7944	13.0901	32.234	28.4098	33.9684
17	(ref.b) (Valine)-272.0	18.6858	22.879	22.906	17.7767	13.1726	12.8912	25.413	13.0015	12.0192	8.66557	11.0579	11.9547	8.11291	14.9837	13.2058	21.3461	24.9052	27.0231
18	(ref.b) (Glycerol)-292.7	13.1444	10.2548	14.8007	11.0504	10.7416	10.6184	20.2333	13.9822	12.5865	14.603	14.5985	13.9675	13.1897	22.8536	23.9036	27.7792	27.5693	24.1233
19	(ref) (4-Hydroxypyridine)-293.9	23.6874	25.4766	23.4202	25.6719	15.1173	14.0881	17.3361	15.5855	12.2627	6.51254	11.5339	9.82444	4.49795	11.9842	9.96357	22.2942	20.3025	30.441
20	(ref.b) (Leucine)-305.4	18.3701	20.4096	19.4891	21.2148	13.7533	13.7075	19.9618	13.557	12.008	9.77171	11.3753	11.941	8.52616	15.3904	11.4623	22.1555	25.5145	31.3922
21	(ref.b) (Isoleucine)-319.6	19.6658	23.6939	21.946	19.9808	10.5994	12.4402	16.7115	12.6184	10.4479	8.78168	11.3928	12.6567	9.24058	15.5983	12.1674	25.6196	26.0971	30.3417
22	(ref.b) (Glycine (P1.1))-325.7	17.1583	28.1516	16.6779	22.1563	13.5446	16.6706	18.3369	15.2654	14.4771	10.8201	12.5324	14.8027	8.52482	14.3799	14.9736	23.0036	16.1261	22.3981
23	(ref.b) (Proline)-339.0	11.4724	14.1956	4.21607	11.48	6.67282	16.6314	9.05895	5.55252	7.26345	9.03135	10.4295	15.1136	13.1697	24.4026	12.3348	45.7877	38.7469	44.4406
24	(ref.b) (Glycerate)-345.0	18.0664	21.6561	24.6886	19.8726	11.2736	11.3539	15.9513	14.1411	9.8367	11.5676	10.5335	12.0522	9.33308	15.2595	13.2442	25.209	27.1361	28.8244
25	(ref) (Benzoate)-348.1	19.6311	19.2936	27.0923	20.503	15.6102	16.4047	15.8644	18.5347	11.0091	12.3118	11.9935	10.5829	8.57978	10.8552	13.0755	23.11	23.7127	21.8353
26	(ref) (Serine)-358.6	12.4977	21.7708	17.1141	19.9146	18.3574	19.2842	19.7793	18.4294	14.6833	22.7668	13.7998	14.4602	8.34151	11.4467	20.8466	16.7001	16.1959	13.6116
27	(ref.b) (Threonine)-368.1	17.5016	12.5303	16.85	16.5274	19.4261	19.5597	20.9009	20.9954	11.8899	15.3118	12.0765	16.3136	12.3406	17.187	19.9747	17.4177	17.7846	15.4121
28	(ref.b) (Fumarate (|Maleate))-372.0	14.6458	15.6187	17.9731	18.3554	10.637	20.7894	21.2726	24.6424	8.09267	17.5856	12.7462	16.289	11.9985	15.5818	24.3495	16.1421	20.7739	12.5063
29	(ref.b) (Nicotinate)-386.1	24.4354	31.7036	30.0934	24.7908	15.2051	17.5986	18.5539	17.4389	13.7015	10.7691	12.4854	12.5521	7.88247	9.6514	10.6288	13.5683	13.5156	15.4257
30	(ref) (Pyrrole-2-carboxylate)-388.5	18.1447	19.3868	28.5278	30.1049	18.4578	16.0743	27.0156	24.3064	22.9454	11.8634	16.9697	15.9155	5.79208	8.5691	11.9916	7.07925	12.3101	4.54531
31	(ref.b) (b-Alanine (P1.1))-395.2	18.6743	20.4206	20.7815	19.8564	15.5975	15.9548	18.8619	15.1747	12.7189	9.03738	11.9958	13.1446	8.17791	13.8758	11.3678	25.3921	22.9356	26.0324
32	(ref) (Homoserine)-407.6	14.4972	16.9177	11.3846	15.567	10.7484	12.9248	16.9956	14.4279	10.2969	10.0015	10.4408	14.3179	8.15494	16.7823	13.7063	34.7838	30.6829	37.3695
33	(ref.b) (Erythritol|Threitol)-409.3	31.5554	34.376	32.8929	25.2257	15.4956	13.8632	12.271	12.8814	10.3026	7.45838	8.79271	10.8194	5.4026	10.3925	10.1385	18.0869	18.0618	21.9833
34	(ref.b) (Malate)-442.3	15.2601	19.5613	18.5239	16.6028	13.679	16.6382	18.4954	20.8633	13.761	16.1209	13.3488	18.983	17.4435	13.3586	17.9343	16.0772	19.189	14.1597
35	(ref.b) (trans-4-Hydroxyproline)-449.4	14.3194	17.5214	7.54254	16.9853	11.3995	14.4377	21.1103	11.3915	11.5602	8.7743	16.1537	19.9513	7.24106	15.5966	9.70066	31.5697	27.9373	36.8076
36	(ref.b) (4-Aminobutanoate)-453.6	25.3661	31.1128	31.4497	25.3306	16.4528	14.498	17.4229	13.9216	12.3114	7.48147	10.3444	11.4835	6.50281	12.0794	9.89711	17.8961	16.089	20.3604
37	(ref.b) (Aspartate)-457.9	3.19118	3.73	4.00665	6.497	5.57863	8.9526	10.3966	11.6688	9.1123	14.9006	9.88984	17.1675	18.1532	17.8033	22.3491	46.8614	51.3294	38.4119
38	(ref.b) (Threonate)-458.6	9.74591	10.8821	11.6261	12.3112	7.78607	8.08889	12.5617	10.0374	8.19908	10.4221	9.80153	11.9987	11.152	18.7619	16.0945	43.8071	42.7311	43.9927
39	(ref.b) (Arginine)-491.1	3.15864	3.02553	4.10589	4.38807	3.42549	3.70619	8.79754	4.92209	3.89799	12.0527	6.1974	14.8121	16.6012	14.6321	12.6861	55.0018	67.7974	60.7918
40	(ref) (Xylose (P1.2))-493.8	35.5594	38.2317	41.6332	24.636	15.9348	14.0541	15.3415	12.6491	10.2872	6.92587	9.38094	9.41154	3.46837	9.9674	8.99887	14.0688	13.836	15.6151
41	(ref.b) (Arabinose|Lyxose|Xylose)-498.2	33.7215	33.5572	33.3513	27.5531	19.1827	18.1639	15.2294	12.4907	13.5216	5.04113	7.90652	9.1989	4.26252	11.6552	10.4458	14.1924	15.2078	15.3185
42	(ref.bx) (Ribose (|Ribulose))-501.8	31.0226	32.8994	32.0296	26.7832	19.6477	19.0174	16.919	13.2653	12.9181	6.17818	10.07	10.1205	5.7242	9.51054	9.78093	13.3727	14.607	16.1334
43	(ref.b) (5-Oxoproline)-507.0	12.236	13.6414	11.1904	16.5991	14.0458	15.472	18.9453	21.3255	14.1096	14.4621	14.3326	17.6551	9.79834	15.4225	21.1106	27.9592	21.2323	20.4623
44	(ref.b) (Glutamate)-508.3	1.59503	2.25272	1.16633	5.95685	4.10627	7.69297	17.3825	11.0197	6.62265	20.5618	12.2837	22.4374	25.2084	24.4998	26.6996	29.2955	45.8378	35.3811
45	(ref) (Rhamnose)-516.6	34.2877	42.0389	44.081	29.2486	17.5631	15.6686	15.3912	13.3736	13.8412	6.19608	8.47058	8.36666	4.39353	8.39542	7.83402	10.4828	10.1584	10.2086
46	(ref.b) (Putrescine (P1.1))-517.9	18.4086	17.7188	20.6506	16.6951	10.8743	11.4726	15.2949	11.397	9.779	8.78601	9.4196	11.3236	9.47249	15.0703	10.8962	31.3429	35.52	35.8779
47	(ref.b) ((Fucose|Epifucose) (P1.1))-523.0	26.5495	34.04	32.8412	28.4171	17.7828	17.6753	18.1071	12.29	13.4566	7.1298	9.87015	11.6538	5.4466	11.1185	6.33467	14.3499	14.8986	18.0384
48	(ref) (Arabinono-1,4-lactone (P1.1))-526.0	38.5061	41.7009	35.5942	24.5371	18.807	18.6029	12.7338	14.4764	12.8445	8.64991	13.9678	12.5072	2.69854	5.9224	4.68398	12.8745	5.12552	15.7672
49	(ref.b) (Glutamine (P1.1))-530.6	1.26206	1.48638	1.27512	4.82737	3.70773	4.75098	10.7243	9.56323	4.78315	14.8274	9.89189	17.1456	18.4186	16.6902	20.006	49.9403	58.6606	52.0391
50	(ref) (Phenylalanine)-531.1	14.8374	19.5219	20.392	17.9583	10.6046	11.4666	16.4237	12.4422	10.761	10.0737	11.1342	13.808	10.9673	16.2734	14.6307	29.7395	30.0236	28.9417
51	(ref) (4-Hydroxybenzoate)-535.8	21.6803	14.6274	32.4809	27.1781	17.8489	19.342	15.0402	22.7023	16.8668	13.5821	13.4198	6.64872	6.51904	7.91018	15.2037	16.0003	23.4915	9.45784
52	(ref.b) (Asparagine)-550.4	2.23055	5.68475	3.14025	5.07903	4.32384	5.25868	9.93893	8.4056	3.5017	12.4276	11.5989	23.0865	22.4947	21.8581	16.8486	47.8291	48.1288	48.1643
53	(cpd.bx) (Levoglucosan-like)-556.6-Exp	35.0196	29.6856	23.0235	30.5984	20.3847	31.0413	18.0454	16.9856	13.4835	8.26132	16.8893	17.0658	3.64926	11.1043	8.41442	4.42599	4.95047	6.97145
54	(ref) (2-Deoxygalactose)-562.4	13.6302	24.3813	33.9534	15.9102	9.96971	6.02064	13.1794	7.6715	5.71252	10.6509	9.02869	10.952	9.22147	14.4555	7.82748	37.4079	34.4933	35.5339
55	(ref) (Psicose (P1.2))-573.7	28.1942	36.0076	20.511	30.9471	22.2335	19.8337	17.3735	11.8622	12.6805	7.95015	7.43944	15.1001	7.72565	8.91697	7.72136	7.80938	13.5403	24.1533
56	(ref.b) (Glycerol 3-P)-574.3	3.27451	4.0627	2.31155	4.05449	3.38402	1.72788	7.19045	4.53931	2.44216	3.77546	3.62779	5.68581	10.0948	8.51052	6.90651	71.6103	75.8757	80.9261
57	(ref.b) (Fructose (|Psicose))-580.1	19.0063	21.3681	23.8357	19.1841	14.3306	19.9032	25.7558	20.4936	13.5475	12.8466	11.3694	13.3893	8.77563	11.5318	16.2515	14.4316	20.9066	13.0728
58	(ref) (Fructose|Sorbose)-586.0	22.9442	22.3819	16.296	17.2042	16.5094	21.7514	23.4781	19.7958	13.8476	12.4737	11.7904	16.1212	8.87133	14.2602	14.9218	15.0284	15.2623	17.062
59	(ref.b) (Glucose (P1.1))-591.4	21.5656	24.9591	20.3775	21.9466	12.1428	17.7303	22.0696	16.6486	13.7005	12.9416	10.8697	19.2758	10.7307	15.1332	19.1382	10.7458	20.2465	9.77771
60	(cpd.b) (Glutamine (P2.1))-598.8-Ref	4.86779	6.02867	4.05504	9.00416	8.22787	10.8185	20.863	16.9076	11.086	21.7818	16.2587	23.9459	20.8439	22.7323	27.197	22.6394	29.845	22.8975
61	(ref.b) (Glucose (P1.2))-599.4	21.6778	27.6407	28.533	27.2119	17.53	24.5088	21.1406	21.5911	14.6093	12.2829	11.9581	12.5797	7.68384	12.1235	12.4003	10.003	9.15663	7.36898
62	(ref) (Methylglucopyranoside)-613.6	40.6708	43.7271	64.9319	24.3578	18.4098	11.2318	15.3697	8.25822	6.41234	8.35463	12.5438	6.85771	6.84277	11.3682	5.45688	4.40423	5.6929	5.1094
63	(ref.b) (Lysine (P1.1))-616.2	10.0821	13.1581	12.5747	13.0707	8.78165	9.40165	14.1601	11.238	8.52801	11.2586	11.3728	13.821	11.3156	17.6672	16.6369	40.113	37.7823	39.0377
64	(ref) (Galactono-1,4-lactone)-619.1	10.7347	19.7096	16.1009	21.139	11.7223	10.332	13.1715	10.752	8.99893	8.1483	10.425	8.91221	7.08602	13.1838	10.2654	39.7204	34.2072	45.3905
65	(ref.b) (Dehydroascorbate (P1.1))-625.5	13.6339	12.4445	14.5033	19.7977	11.8822	20.5756	17.2596	19.3254	12.6821	21.5197	13.891	17.478	12.6298	17.556	22.1465	15.1593	24.9009	12.6145
66	(ref) (Dehydroascorbate (P1.2))-635.9	26.9036	29.6875	31.3573	21.7702	12.161	15.1878	16.057	10.9594	13.8302	7.55012	10.3782	13.3827	8.46151	12.675	12.1433	19.2576	24.1389	14.0988
67	(ref) (Ascorbate)-651.8	28.2148	34.4356	29.5115	17.8271	11.2566	12.6736	12.6865	7.75392	7.53738	5.4383	8.38647	13.7485	5.63187	11.9894	7.7861	30.2015	26.178	28.7429
68	(ref.b) (myo-Inositol)-654.5	17.7765	21.2018	18.7218	18.252	15.7092	19.8705	20.1723	19.9158	10.7067	18.0018	14.8021	18.4103	13.1649	15.6169	19.719	12.6325	12.7541	12.5716
69	(ref.b) (Tyrosine)-659.1	16.6388	18.9579	19.9174	18.3822	11.4863	11.7742	16.7547	12.6818	10.0866	8.30963	7.53379	13.2647	8.88326	16.0169	11.7723	31.0315	33.3233	33.1847
70	(ref) (Sinapyl alcohol)-662.4	32.7557	42.6499	45.7718	32.2981	21.1464	17.7207	16.7651	14.137	10.6257	6.50464	8.51795	10.5305	2.95544	7.15199	7.24631	8.72105	6.39678	8.10492
71	(ref) (N-Acetylgalactosamine (P1.2))-675.0	28.3406	35.4225	30.7009	23.0889	14.877	16.1661	13.721	14.702	12.1534	9.47559	13.6378	12.1665	9.91152	11.3471	14.0845	15.4624	10.0136	14.7285
72	(ref) (N-Acetylmannosamine (P1.2))-680.9	28.6189	30.286	44.8703	21.6606	12.4545	9.9641	15.5964	18.2564	5.55917	5.40022	11.8779	11.5035	8.92439	14.1314	12.2212	19.7995	12.9938	15.8817
73	(cpd) (Hexanoate)-206.6-Exp	21.4944	20.4285	23.165	21.8751	18.938	20.5679	16.4073	19.7536	16.9718	10.3127	9.83279	16.2974	6.76822	8.14437	6.68564	23.1423	22.9028	16.3123
74	(ref) (Phytol (P1.2))-716.5	9.36773	11.0853	5.59907	6.68802	4.47633	3.70265	13.6173	8.31791	3.78882	8.18752	7.91819	11.2256	11.0811	18.9705	9.1008	51.0584	49.2317	66.583
75	(ref) (3-Indoleacetonitrile)-724.0	29.6504	31.7121	40.3923	25.0428	15.6252	12.2883	17.5679	15.2264	12.2727	5.78844	11.3409	10.486	7.30411	12.0892	6.42964	14.6462	14.0061	18.1311
76	(ref.b) (Spermidine)-724.8	13.145	21.6751	15.876	13.3938	9.11154	8.87416	12.491	8.72512	7.04116	8.80642	9.64228	12.5124	7.82892	15.4041	12.5371	44.3349	35.4418	43.1592
77	(ref) (Phytol (P1.1))-734.1	6.18943	7.02525	5.85286	7.95025	4.63356	3.9511	11.6104	7.94174	4.70826	9.3525	9.32056	12.8493	13.0648	19.6429	14.6017	51.8326	51.4359	58.0368
78	(ref.b) (Sinapate (P1.2))-752.8	33.626	42.6558	35.3445	33.3746	21.5419	20.1018	20.1698	17.0943	17.534	7.91927	7.54555	14.9653	3.08808	6.93046	6.98982	1.82228	4.23199	5.06451
79	(ref) (Tryptophan)-791.1	6.73367	6.31734	8.08684	9.53123	9.0097	6.53802	13.1307	9.76613	6.74031	10.806	9.414	13.8747	10.1999	12.5887	14.439	49.5986	52.9041	50.3212
80	(ref) (Sinapate (P1.1))-817.9	24.1438	22.3973	21.9096	21.3629	18.4983	19.076	22.1584	19.4791	13.591	11.4011	15.1646	17.4523	8.63105	11.8743	13.6884	12.3028	12.5864	14.2828
81	(ref.b) (Sucrose (P1.1))-841.4	27.2916	16.8988	17.4183	15.1056	19.4194	22.8379	12.562	17.3995	11.1686	22.1166	13.9945	21.1098	11.4316	17.4912	19.6262	11.4925	14.7966	7.83918
82	(ref) (Lactose (|Lactulose))-858.6	31.7013	32.3449	40.6688	31.435	15.8634	18.9402	14.3181	15.9367	11.1204	3.50332	9.43191	5.35082	2.31599	12.4896	6.25517	16.7262	13.9336	17.6646
83	(ref.x) (Cellobiose)-862.3	25.696	30.9698	35.5162	24.0253	16.4924	16.0539	23.4419	17.5949	13.4623	6.26575	12.0783	13.6537	5.71021	11.5145	10.1537	14.8609	11.3501	11.1603
84	(cpd.b) (Glycine (P2.1))-228.1-Exp	17.6903	19.8147	16.2442	17.1028	14.1402	14.8448	17.0823	13.8454	12.0285	9.17035	12.5684	15.4172	8.73138	16.3926	13.3438	30.2229	23.2387	28.1216
85	(ref.x) (Maltose|Laminaribiose)-871.0	15.8571	15.1226	17.4155	16.5806	10.7618	9.62325	16.0367	13.1006	10.9606	9.85784	9.83469	14.535	7.89404	16.4918	13.5077	33.7736	34.6885	33.9579
86	(ref.b) (Maltose (P1.2))-880.2	29.8144	39.6828	29.3191	31.3668	17.3471	20.2613	11.3934	13.9237	14.9547	9.15088	9.00275	11.8601	6.0763	11.4109	9.21859	12.1982	8.63271	14.3862
87	(cpd.bx) (Lactobionate-like)-891.7-Exp	12.3616	18.7684	9.06807	17.4513	12.3749	9.4366	22.5603	17.3297	9.13869	14.6819	10.3797	28.1525	7.11796	12.0311	18.4026	25.8268	29.1162	25.8015
88	(ref.x) (Docosanoate)-904.0	17.2257	17.082	21.2616	21.3889	12.8894	19.4543	19.1299	19.0013	15.8984	13.2489	12.638	15.012	5.80032	7.67728	12.1586	23.2064	30.7121	16.2152
89	(ref) (Gentiobiose (P1.2))-909.7	24.3943	23.8173	24.1938	24.0737	18.8389	16.697	18.0113	18.2605	13.0946	10.8462	14.0993	17.6032	6.98208	11.9066	9.64296	15.6924	13.0774	18.7685
90	(ref) (Melibiose (P1.1))-914.3	29.5783	37.5148	35.9524	24.2891	15.3259	15.5552	12.5864	11.959	11.2967	8.07485	6.65437	9.58785	4.09494	8.2604	8.15829	21.3764	20.2855	19.4496
91	(ref.b) (Galactinol)-940.2	16.7334	19.6556	17.6489	20.2208	13.5811	13.3264	19.0061	15.394	12.3336	10.7461	13.0581	16.6181	7.66095	16.3905	15.0868	25.6326	21.9207	24.9862
92	(ref.x) (Tetracosanoate)-963.6	18.2522	20.6257	21.9691	22.3961	14.8022	16.4987	20.5884	19.7961	13.1978	13.2116	12.7454	15.0222	5.85117	9.13203	15.4438	19.7004	22.8985	17.8685
93	(cpd) (3-Hydroxypyridine)-283.0-Exp	22.1548	21.2971	22.8038	23.7386	12.5349	15.4754	14.5972	12.5477	11.5679	8.3341	10.804	10.9365	5.20644	10.2607	11.2558	25.9688	32.5556	27.9605
94	(ref.bx) (Raffinose (|1-Kestose|Inulotriose))-1033.3	23.2545	27.0126	24.0388	27.6068	17.7012	17.6031	19.7429	17.0312	15.4097	9.17663	12.9737	15.3958	6.3967	12.5078	12.0894	13.8225	12.7734	15.4632
95	(cpd.b) (Ethanolamine)-284.0-Exp	16.7114	18.3877	19.8512	22.0114	12.2555	14.0514	22.268	16.3667	10.4659	12.8285	12.5077	18.8467	10.3547	16.9017	16.0879	15.8259	23.5806	20.697
96	(ref) (Octacosanoate)-1072.0	17.8467	13.8027	26.0972	21.3265	21.225	16.6965	17.9024	21.5434	15.4459	14.425	11.0779	13.279	6.76959	8.43394	16.1429	21.7299	23.9171	12.3385
97	(cpd.z) (Urea)-340.8-Exp	17.9951	21.242	18.943	16.1489	11.2895	17.0157	16.6998	15.6327	12.2105	11.7161	13.7635	16.2394	16.9207	17.9879	15.0325	20.5194	20.0845	20.5587
98	(cpd.b) (Trehalose)-876.1-Exp	19.2721	19.8536	21.2757	19.8424	12.0124	10.4952	15.127	12.3845	11.065	9.73143	13.1723	14.4191	8.43568	21.0398	14.9867	27.5913	21.5373	27.7583
99	(ref) (Campesterol)-1107.3	42.7145	55.1136	48.8803	27.0664	16.2063	14.3958	16.3125	11.9153	10.1197	4.85255	8.38069	10.6514	3.02414	4.45297	5.66234	6.02991	3.93118	10.2904
100	(ref) (Triacontanoate)-1121.7	19.6344	17.0199	27.1394	18.9843	17.515	14.9864	17.9046	16.9891	13.4264	11.2671	10.9612	14.2181	6.24585	10.0906	14.9688	25.9638	27.4243	15.2609
101	(ref.x) (Sitosterol)-1128.3	39.1198	50.4917	43.1054	25.2253	15.5666	14.8686	19.8911	11.9656	11.2774	6.89741	9.90591	15.138	4.75606	8.50623	9.68496	4.11025	3.56392	5.92561
102	(cpd) (Hexacosanoate)-1018.9-Exp	21.2468	25.9109	24.3244	21.6765	14.7617	15.7316	19.6298	18.5817	12.3013	11.7283	11.7549	14.6419	6.49843	8.56148	13.3397	19.2201	20.4294	19.6611
103	(cpd.b) (Unknown)-203.4-Exp	3.06785	5.00852	1.72402	4.39858	3.48841	6.04922	6.79107	6.67246	4.36908	9.11833	6.43683	12.8337	22.1331	15.1747	19.0256	54.4911	63.2191	55.9984
104	(unk) (Unknown)-217.5-Exp	30.8422	24.2842	21.33	26.6448	21.4643	39.7274	18.7706	30.5741	16.4591	12.0291	12.201	9.38071	5.52062	5.90403	10.6131	6.19278	5.57231	2.48974
105	(unk) (Unknown)-231.5-Exp	29.5621	25.5837	22.3527	28.0037	17.2976	35.7241	18.0721	33.0457	16.9009	12.3895	12.7925	8.92473	6.15542	6.30053	11.947	5.8171	4.98	4.15048
106	(unk) (Unknown)-234.5-Exp	37.2734	34.8355	34.0947	30.3055	20.5789	24.4884	15.6807	18.0236	17.4937	7.22503	12.3549	9.95891	3.55342	9.14188	8.14888	5.96188	5.06521	5.81548
107	(unk) (Unknown)-236.8-Exp	17.3118	19.0202	33.4817	35.7605	21.9304	17.342	20.1991	33.0282	18.7706	14.7002	11.6574	13.5717	8.44402	8.4205	13.7241	3.58442	5.94328	3.10994
108	(cpd.b) (Unknown)-245.9-Exp	21.3335	24.9963	22.4408	20.7785	14.113	12.6532	15.8894	13.2555	10.5567	7.62962	10.5404	10.6336	7.62753	12.3784	10.0291	26.7414	24.7164	33.6865
109	(cpd.b) (Unknown)-274.9-Exp	18.793	15.7845	22.9256	24.659	16.3034	14.3613	19.801	23.4259	13.3702	13.4209	12.2829	20.2889	6.73741	9.2631	13.4199	16.5887	22.9402	15.6341
110	(cpd.b) (Unknown)-353.8-Exp	49.3029	58.1978	63.1413	31.9216	15.3924	14.4208	10.3821	12.1232	14.0399	2.21828	5.07146	2.57662	1.2239	2.94613	2.30886	4.95118	6.26904	3.51248
111	(cpd.b) (Unknown)-361.8-Exp	9.62532	6.39539	9.27752	11.3808	5.12437	14.253	17.8952	20.7998	9.13499	14.8724	15.2383	15.473	19.3709	22.3242	13.0335	26.8555	30.1179	38.8279
112	(unk) (Unknown)-368.9-Exp	24.5388	23.976	31.7001	39.817	24.5159	29.9375	15.3553	28.3408	14.9656	10.967	10.5191	8.06692	3.73367	5.76288	9.004	5.58828	6.88531	6.32592
113	(cpd.b) (Unknown)-375.6-Exp	31.5204	36.0489	34.6116	19.354	9.70747	17.4128	11.2857	13.2819	13.0057	8.50564	7.91829	11.9836	9.06601	10.7361	13.8138	20.2683	22.3073	9.17251
114	(unk) (Unknown)-389.0-Exp	25.2398	23.8899	27.1877	31.6759	22.8672	29.0475	19.5789	26.7986	19.4952	11.6575	12.2102	8.79698	4.30338	6.81299	8.76102	7.54445	7.4211	6.7116
115	(unk) (Unknown)-396.4-Exp	24.2184	21.4051	26.252	29.1652	23.874	28.8144	20.26	27.9122	19.6336	12.9036	12.8423	8.64482	5.76439	7.14966	10.1616	7.68839	6.81669	6.49368
116	(unk) (Unknown)-401.7-Exp	21.149	23.894	25.0855	25.0288	18.7497	19.4319	19.144	17.6482	14.39	8.53034	11.772	11.5433	6.65084	10.6213	11.0746	19.497	17.3148	18.4748
117	(cpd.b) (Unknown)-428.5-Exp	11.2982	12.8841	11.2683	12.9619	7.91227	5.72251	13.4599	9.91426	7.58771	8.80912	10.8061	10.6423	8.66386	17.8715	15.2082	44.807	40.6117	49.5709
118	(unk) (Unknown)-431.7-Exp	8.44092	10.5389	11.9446	14.5592	15.7714	19.6684	18.1367	18.1706	13.7213	10.7065	9.81057	13.8126	29.2488	25.0966	20.7664	18.9078	20.6119	20.0867
119	(cpd.b) (Unknown)-452.3-Exp	5.90327	6.17005	5.63447	9.11538	6.35856	5.51839	13.0221	8.31511	5.96677	7.87436	9.57567	12.0501	7.07935	18.9785	11.7293	57.0055	50.6021	59.101
120	(cpd.b) (Unknown)-560.9-Exp	19.0171	16.2855	27.3449	32.0143	26.2365	22.1305	24.6481	24.6417	14.7043	10.3542	15.4508	14.537	4.72031	9.44491	10.4893	9.24595	7.94048	10.794
121	(unk) (Unknown)-605.8-Exp	12.3415	15.9434	17.0838	15.8911	8.68548	8.62483	18.5381	10.8463	12.5736	12.5462	13.2524	18.0146	10.8105	20.5737	23.5801	29.8726	30.6987	20.1231
122	(unk) (Unknown)-608.3-Exp	23.7944	30.1357	20.3073	20.7292	12.6709	17.2149	20.4959	22.8228	11.3882	12.7059	8.1286	23.1649	5.40349	7.71862	12.4217	16.8711	18.5233	15.503
123	(unk) (Unknown)-618.8-Exp	11.1505	12.446	13.185	13.2396	8.09686	7.10851	15.3489	9.30826	10.1763	9.51811	11.4363	14.0978	7.84404	20.0616	17.7519	42.8989	38.6511	37.6806
124	(unk) (Unknown)-627.1-Exp	13.7389	11.7028	13.3561	14.752	7.93284	7.37065	14.2492	9.62135	10.8531	10.6554	11.9947	14.1626	8.51863	19.8679	18.5861	38.0858	38.8804	35.6715
125	(cpd.b) (Unknown)-731.5-Exp	13.1893	18.6946	12.0439	16.7671	14.0468	8.23634	24.0405	16.2368	9.77556	16.1194	12.3495	30.6586	7.57212	15.5771	20.9624	22.3116	23.0952	18.3232
126	(cpd.b) (Unknown)-738.0-Exp	12.7926	15.723	11.5996	13.4289	8.81767	7.50065	14.8408	11.1391	7.5697	9.00576	10.1913	13.7777	9.17763	16.9913	10.9761	40.7543	37.1377	48.5762
127	(cpd.b) (Unknown)-752.3-Exp	19.4393	25.8277	27.7655	19.5701	14.0482	14.5458	15.7783	15.4	10.4242	12.221	11.2144	11.8499	11.1151	14.0381	13.0682	21.8761	19.4715	22.3464
128	(cpd.b) (Unknown)-768.9-Exp	33.5455	38.0995	39.6135	22.7592	17.957	16.1172	17.883	13.5659	12.7119	7.39836	9.96675	10.7904	4.72181	8.79674	7.82887	13.6921	11.6141	12.938
129	(cpd.b) (Unknown)-983.6-Exp	21.6892	20.2988	18.194	21.3741	15.3958	20.0887	22.2387	19.3806	14.6222	11.3695	12.4377	19.4278	9.12521	15.4944	17.1589	14.2032	16.9928	10.5084
130	(cpd.b) (Unknown)-1005.5-Exp	5.25184	7.47296	11.5799	5.37788	5.37685	8.64357	12.6924	10.904	4.22236	7.45965	11.5395	8.33856	37.9119	40.5512	30.7875	31.3063	24.1555	36.4281
131	(unk) (Unknown)-1134.4-Exp	17.5391	21.4653	24.855	18.2578	13.008	16.7022	17.1719	12.3441	12.4857	8.37706	8.02589	15.7204	8.34654	14.9287	8.35028	30.3076	30.2281	21.8865
132	(unk.x) (Unknown)-1172.5-Ath	5.49305	7.93682	5.74422	8.78337	5.82636	2.83803	9.58217	6.65979	5.21451	8.23816	7.53465	15.4209	12.9184	25.3299	17.5936	54.9849	46.7125	53.1888
133	(unk) (Unknown)-1200.7-Exp	4.79732	12.1427	14.5811	10.791	17.0802	13.5614	23.3432	15.1459	14.7802	15.3482	14.5694	21.4692	20.9761	28.7565	20.2425	24.7441	12.3053	15.3655
134	(unk) (Unknown)-273.1-Ath	11.302	14.942	11.3708	15.9086	9.64449	12.5177	18.0417	13.3484	10.1093	8.5568	13.1733	15.7314	12.7518	16.6981	13.4298	33.4391	32.1937	36.8409
135	(cpd.b) (Unknown)-287.8-Ath	10.791	10.5183	11.276	12.0104	5.81508	5.15349	10.895	6.28413	6.23865	9.3807	8.43599	10.9988	13.3813	18.1244	14.6415	43.5416	50.8221	51.6916
136	(unk) (Unknown)-304.0-Ath	24.8887	28.7194	28.4084	21.6065	12.6989	11.8875	14.5514	10.7472	9.30489	5.86852	8.45314	8.7361	6.13386	11.7404	8.94911	26.9511	27.6409	32.714
137	(unk) (Unknown)-309.4-Ath	24.327	27.439	20.5788	24.0906	13.7466	20.2358	26.0343	20.968	16.9666	9.74142	15.9422	19.387	6.07344	15.1205	12.0933	9.73321	6.78373	10.7384
138	(unk) (Unknown)-316.9-Ath	22.5595	31.9147	36.7826	27.6548	16.8558	15.2867	19.8256	15.4795	9.99662	7.70904	9.44268	12.2146	5.23841	12.707	9.36018	17.0127	13.6003	16.3592
139	(unk) (Unknown)-321.1-Ath	8.88032	9.98388	10.0354	13.7098	7.37656	11.0927	17.5861	10.5923	13.628	10.2282	11.4672	19.846	10.7822	22.1857	18.7088	38.8135	38.3942	26.6892
140	(unk) (Unknown)-346.5-Ath	7.72166	5.82421	10.4784	12.4004	8.08363	8.86312	11.9906	10.6395	8.445	10.6045	9.1378	10.4836	6.60753	12.1509	15.0079	50.6753	54.164	46.722
141	(unk) (Unknown)-348.8-Ath	33.4307	37.5558	39.4978	27.8688	19.1838	16.3206	18.4269	15.5495	16.4964	6.92252	11.0238	11.5203	6.62882	10.5751	7.31335	6.72225	6.112	8.85165
142	(unk) (Unknown)-355.0-Ath	24.0118	31.4748	37.3287	29.3042	19.2131	14.9059	17.4237	13.8227	13.5797	8.24633	9.0267	10.2196	4.86458	6.82493	11.1001	16.1494	19.6378	12.8659
143	(unk) (Unknown)-376.0-Ath	17.3865	24.6365	22.0118	20.1885	15.8655	14.8619	15.4734	13.1312	10.2382	9.63718	9.30515	13.9792	8.56726	10.8682	8.42997	28.7472	26.1934	30.4789
144	(unk) (Unknown)-401.2-Ath	13.7518	15.3596	16.0051	15.4124	9.89021	8.48039	16.607	11.475	9.4235	10.9551	11.4696	12.9939	8.18202	17.5032	16.6387	35.0915	34.3023	36.4584
145	(cpd.b) (Unknown)-412.8-Ath	10.4882	13.1469	12.2755	15.039	13.0077	15.6468	19.467	15.2788	14.6561	9.32196	10.633	17.4491	14.0772	8.45451	19.0963	31.6066	39.479	20.8762
146	(unk) (Unknown)-418.2-Ath	21.0769	25.3751	26.0981	28.8834	14.6904	13.7776	15.0634	13.205	14.6391	7.42845	11.1673	12.8162	4.40375	13.7605	12.1727	23.1441	21.8018	20.4962
147	(cpd.b) (Unknown)-419.1-Ath	14.4312	20.7369	8.80736	10.1253	7.86484	2.15024	7.81471	8.4937	2.04815	5.23498	6.93143	2.64355	6.13085	13.7657	3.6532	56.2629	42.2074	80.6975
148	(unk) (Unknown)-426.5-Ath	27.8463	36.6439	35.0745	26.9505	13.2615	12.5952	18.2757	11.1964	12.0719	6.72658	8.46105	12.1174	4.59345	9.93443	7.98029	15.6075	20.5027	20.1607
149	(unk) (Unknown)-426.6-Ath	34.6053	49.0057	47.5315	29.1927	15.8933	13.4373	19.3654	12.4568	13.8435	5.17575	8.0936	8.92755	2.10729	7.15656	5.66066	9.55359	7.39405	10.5994
150	(cpd.b) (Unknown)-434.7-Ath	13.427	14.9827	16.7233	11.2328	6.9792	6.28375	12.0486	7.04942	8.17582	7.98713	10.7046	8.08069	6.77871	13.9279	10.5046	48.5257	46.3561	50.2319
151	(unk) (Unknown)-435.1-Ath	21.6159	22.5903	21.5278	23.5208	15.5092	12.8222	14.5484	15.6996	14.9638	8.3895	12.3624	14.3227	8.56049	13.5711	14.0459	23.3649	20.2674	22.3178
152	(unk) (Unknown)-438.8-Ath	35.63	39.1989	51.6575	31.795	20.684	16.1895	18.1872	16.1704	11.934	6.05323	12.9471	9.04957	2.59657	7.59163	5.22422	5.73803	3.40798	5.94529
153	(unk) (Unknown)-443.2-Ath	11.4643	7.05014	8.90606	9.14444	3.89644	4.33691	14.7173	6.89982	5.76591	9.18216	6.35029	11.4573	11.2013	15.657	9.50911	44.2905	60.1463	60.0247
154	(unk) (Unknown)-448.8-Ath	36.2842	38.3149	31.1933	30.4376	20.3105	25.5411	19.7296	17.738	18.6742	7.54496	12.4543	12.7578	2.5795	8.71381	7.37534	3.42414	2.46841	4.45831
155	(unk) (Unknown)-449.4-Ath	23.5814	35.9115	30.5158	32.8561	19.8144	17.2022	25.0273	17.6702	15.8439	6.74133	10.304	13.947	2.68861	7.51743	6.47536	9.10531	8.78237	16.0158
156	(cpd.b) (Unknown)-454.1-Ath	35.232	36.6358	32.9825	30.108	21.4166	22.0505	19.4941	17.9378	16.9099	6.50693	11.8668	12.8496	3.39156	8.37923	7.677	5.26748	3.7638	7.53054
157	(unk) (Unknown)-459.1-Ath	44.0778	42.425	54.3686	33.258	23.3079	17.4246	9.50519	15.0057	15.6061	3.80123	7.12853	3.93619	1.45307	4.09371	4.89027	7.90476	8.03921	3.77429
158	(unk) (Unknown)-463.6-Ath	19.278	14.3202	18.1133	16.8878	13.9006	18.1752	16.8359	16.2464	7.70461	10.3052	14.2602	14.4885	9.47045	14.1268	14.6304	27.2228	27.1458	26.888
159	(unk) (Unknown)-465.9-Ath	20.7933	18.4743	24.0354	21.1713	12.8091	14.1396	15.7684	9.00365	15.0757	8.29858	10.5346	14.4938	7.7189	17.4707	17.2908	26.2496	31.7077	14.9648
160	(cpd.b) (Unknown)-468.7-Ath	8.36131	10.7781	8.90104	15.5482	9.39632	10.776	16.9852	11.6535	8.87142	10.2977	11.8927	13.8424	7.55929	18.2268	15.7752	41.2483	38.0526	41.8339
161	(cpd.b) (Unknown)-471.0-Ath	27.9499	32.0345	29.0532	19.9061	15.4575	17.578	28.1966	16.0408	13.3576	6.74494	12.3644	13.6977	5.80292	11.3657	10.4013	11.3995	12.7372	15.9122
162	(cpd.b) (Unknown)-484.4-Ath	30.0649	28.3353	29.559	25.1035	20.8946	19.0188	18.1163	16.161	12.2341	6.19159	12.4377	10.711	5.46998	10.4578	11.7363	15.0537	11.7136	16.7407
163	(cpd.b) (Unknown)-492.6-Ath	3.6919	1.97925	3.52496	7.67106	5.45662	5.84219	11.1494	11.4661	6.49238	12.4432	9.17811	13.3422	9.70588	11.2526	16.0483	55.3385	60.6673	54.7499
164	(cpd.b) (Unknown)-494.1-Ath	9.47315	11.9391	8.96515	11.88	8.0706	7.81116	12.6889	9.89645	8.08287	10.1348	10.4565	10.767	7.77981	16.5771	11.1706	48.0433	43.0603	53.2032
165	(unk) (Unknown)-495.8-Ath	26.2868	32.9115	34.697	21.4247	17.0887	11.3297	16.1609	11.8586	9.97937	6.15235	8.83682	9.86031	5.67103	11.1064	8.73538	24.3041	18.198	25.3983
166	(cpd.b) (Unknown)-510.9-Ath	21.9202	20.4398	25.6682	29.7692	22.3329	18.3357	23.8618	20.5317	18.0398	10.3564	19.2429	17.5661	6.11042	10.9704	10.4576	7.98195	6.48232	9.93249
167	(unk) (Unknown)-521.3-Ath	31.4148	48.5515	23.5699	25.7163	14.069	26.1557	23.4337	14.3945	19.0535	10.1171	12.2202	18.255	6.0578	5.75748	9.20827	3.26036	5.00732	3.75769
168	(cpd.b) (Unknown)-525.7-Ath	24.9473	32.4965	30.6321	23.2857	18.785	18.5298	21.1774	16.4494	18.3893	10.8154	11.2295	11.3808	6.92987	10.1704	14.6249	12.8444	10.8692	6.44307
169	(unk) (Unknown)-531.5-Ath	36.4181	45.1033	42.0926	32.1908	19.2964	16.3268	18.0834	14.4665	15.8085	5.44943	9.15029	11.3736	2.33786	7.48454	5.56735	5.5205	4.49893	8.83119
170	(cpd.b) (Unknown)-534.5-Ath	23.1233	25.0991	23.0925	25.2742	15.6887	19.0188	19.1829	17.1682	14.9553	8.9925	13.3236	14.9101	6.92447	12.745	13.0792	16.5026	15.9754	14.944
171	(cpd.b) (Unknown)-534.1-Ath	20.9869	34.0744	29.1669	37.6966	20.6253	24.3956	23.4612	19.3102	19.6336	9.7134	14.0293	13.1754	3.3626	8.67692	9.21629	4.77928	3.28386	4.41221
172	(unk) (Unknown)-557.4-Ath	29.1686	27.4291	27.3879	25.1218	21.6397	20.0927	19.2952	16.9212	12.5852	6.84134	12.372	11.8164	5.57396	10.0802	12.1247	13.9991	11.5578	15.9931
173	(cpd.b) (Unknown)-562.5-Ath	29.6879	31.0181	29.0575	22.5503	17.5648	17.6988	22.8016	15.6323	12.9579	7.21901	13.864	14.2044	5.50126	10.5523	10.5386	12.2399	11.3686	15.5427
174	(unk) (Unknown)-571.3-Ath	48.3234	55.9902	56.033	29.8437	17.7462	15.229	12.6657	11.3459	12.6517	2.63584	7.32395	6.08036	1.44023	3.52087	2.86079	5.09119	4.07293	7.1452
175	(unk) (Unknown)-577.3-Ath	24.309	40.7992	34.7304	25.7893	13.8929	25.9319	17.9856	14.4341	13.1098	10.864	9.29918	10.9542	7.43411	12.1595	10.4372	13.618	9.41505	4.83639
176	(cpd.b) (Unknown)-616.2-Ath	27.2762	21.7727	24.9194	23.778	19.8855	18.8524	19.2091	16.7281	13.6744	8.2666	13.5514	12.6834	6.07197	12.4984	12.8187	15.3982	15.5639	17.0518
177	(unk) (Unknown)-621.6-Ath	26.2937	28.7753	25.653	25.2162	18.6596	17.9313	26.05	18.4471	16.3676	10.3881	13.9141	14.6273	5.57173	13.2412	11.7359	6.48026	6.96283	13.685
178	(unk) (Unknown)-630.2-Ath	11.2095	6.89665	12.3162	15.4145	21.3107	10.8932	18.3712	17.3827	15.2887	10.1673	11.3667	14.7361	10.3388	15.2637	14.8083	34.4987	27.7795	31.9575
179	(unk) (Unknown)-636.7-Ath	28.6636	28.0862	26.8956	20.7159	17.3067	15.6693	19.4657	13.921	16.0569	5.93538	11.4188	17.8617	4.73675	15.9908	14.0512	20.4826	13.2765	9.46523
180	(cpd.b) (Unknown)-640.9-Ath	28.7066	33.7217	24.8728	29.4348	21.9839	23.2874	22.3522	20.4763	20.8467	8.85265	12.8895	16.3872	6.78625	7.77437	9.72326	3.86751	3.15415	4.88263
181	(cpd.b) (Unknown)-661.6-Ath	16.2003	17.1389	23.0731	19.6869	12.202	11.1113	16.9153	11.3409	8.90701	8.24901	11.8929	14.8186	7.14628	10.4583	13.6595	31.8023	36.9669	28.4304
182	(cpd.b) (Unknown)-664.0-Ath	27.3658	33.6973	30.785	29.775	19.0582	11.5439	19.1563	15.349	14.3528	7.28201	10.1958	13.6575	4.3315	9.23554	11.3454	12.0893	12.4642	18.3154
183	(cpd.b) (Unknown)-685.0-Ath	21.6485	21.9918	20.9641	17.6714	13.049	14.3377	14.0557	15.6075	10.0973	8.19815	11.988	15.8699	11.0871	12.8751	13.7004	27.3392	24.4886	25.0305
184	(cpd.b) (Unknown)-706.4-Ath	21.2428	25.8751	22.678	20.283	13.3395	14.091	17.6434	13.5815	12.9447	8.17446	11.1579	15.3437	6.255	15.1667	13.1117	26.4013	20.8793	21.8309
185	(cpd.b) (Unknown)-715.2-Ath	30.2114	33.7273	27.3403	31.9165	23.5793	23.0151	19.6674	18.8848	21.491	8.68815	13.0313	15.6152	6.57289	7.52688	8.18499	2.94366	3.25043	4.35325
186	(cpd.b) (Unknown)-717.7-Ath	25.1605	26.1494	21.7609	27.469	17.9978	18.6487	21.8978	19.9157	17.2236	10.5559	14.3837	17.4793	5.78132	11.566	11.9673	9.13548	9.98737	12.9203
187	(cpd.b) (Unknown)-718.3-Ath	36.0849	35.6697	37.5187	21.6503	17.3884	16.9387	16.9933	14.8053	12.515	7.44786	10.6567	10.8449	5.55945	9.58271	8.43679	12.2642	11.8972	13.7459
188	(unk) (Unknown)-720.9-Ath	31.5486	34.9693	35.918	27.5057	18.1365	17.8559	16.7521	14.393	12.5916	6.43075	10.021	10.3071	4.24661	9.18257	7.56831	13.5162	13.2977	15.7591
189	(unk) (Unknown)-749.4-Ath	28.6925	39.6306	26.9646	24.4241	15.0376	21.3357	19.7927	12.197	14.3327	9.2169	9.73231	13.9114	5.01797	12.8518	6.66631	12.8558	10.5507	16.7893
190	(unk) (Unknown)-753.4-Ath	7.26075	8.95829	8.23919	10.3838	8.04706	8.37777	15.6989	15.2259	10.1186	10.3934	11.4308	24.5793	15.6345	16.789	16.1213	40.6287	39.5489	32.5638
191	(unk) (Unknown)-773.6-Ath	39.0511	39.0407	40.5727	24.5422	17.6372	18.2664	21.4014	17.3752	16.6247	6.05829	12.9774	11.0153	2.8263	8.60701	5.99803	6.12073	4.36243	7.5229
192	(cpd.b) (Unknown)-776.7-Ath	36.9627	39.8624	40.5326	24.8837	17.7878	15.8333	17.2615	13.4617	11.0399	5.0624	9.28009	10.9036	4.44612	9.21504	7.18397	11.3835	10.393	14.5067
193	(unk) (Unknown)-778.7-Ath	35.0725	40.6942	40.4035	30.5331	20.9363	17.3511	20.1995	15.0001	16.9403	5.37388	10.4094	10.7807	2.59116	7.93983	5.68221	6.22988	5.02014	8.84219
194	(unk) (Unknown)-785.3-Ath	18.1134	31.3111	17.1591	22.6589	17.0349	13.4713	25.1885	19.215	11.8113	13.864	7.7434	27.3882	3.96945	8.05107	12.0848	16.2058	16.6446	18.0852
195	(unk) (Unknown)-802.6-Ath	37.6369	47.4783	46.2872	27.1707	16.6156	24.5053	17.8997	16.031	9.94	8.65767	10.16	9.5328	3.94837	3.52877	6.25413	4.68661	6.18635	3.48056
196	(unk) (Unknown)-807.2-Ath	6.73747	6.44739	6.89513	11.3383	6.41478	4.80914	14.8667	8.00429	6.03848	10.0007	10.0704	11.4179	9.46193	17.9666	15.5584	47.5949	51.0965	55.2809
197	(unk) (Unknown)-806.2-Ath	22.6162	32.7682	33.1108	35.0136	19.5267	19.1168	18.4713	16.0757	11.5816	6.76554	9.84552	13.3015	4.30063	9.34368	8.24296	12.8328	12.4403	14.6464
198	(unk) (Unknown)-822.2-Ath	20.1118	20.3722	37.3422	17.2506	9.90788	5.65237	10.6871	7.99777	6.75296	5.48803	7.89779	6.30701	6.0118	11.9857	8.09792	40.4507	41.8387	35.8475
199	(cpd.b) (Unknown)-830.0-Ath	33.4012	37.1147	34.6497	33.2538	21.417	20.1989	19.5147	17.385	17.5896	6.04406	12.343	12.6281	2.82275	7.23351	6.53744	4.96348	4.50678	8.39627
200	(cpd.b) (Unknown)-865.3-Ath	33.6677	41.2589	27.4043	30.7315	21.5902	22.7245	20.3921	17.491	20.4856	6.70546	10.8929	17.409	5.39285	6.14077	6.90881	3.11043	2.62622	5.0677
201	(unk) (Unknown)-867.2-Ath	29.5207	37.7574	45.1161	22.5694	11.7784	8.81411	12.8856	8.84705	11.5216	6.04719	9.08213	7.41856	3.74273	11.3905	10.1816	25.2344	21.1445	16.9481
202	(unk) (Unknown)-899.4-Ath	34.0772	47.051	45.7648	28.3526	16.568	13.727	18.3717	12.4569	11.3589	5.09578	8.7385	10.5283	3.68567	7.23989	6.74967	10.417	7.94574	11.8713
203	(unk) (Unknown)-906.8-Ath	19.2332	20.0525	39.273	16.7024	10.153	7.16117	18.282	13.8694	12.0158	9.33082	9.52011	6.06451	4.33094	11.6502	11.0512	32.1207	34.7547	24.4343
204	(cpd.b) (Unknown)-947.4-Ath	22.5142	20.5035	21.1683	24.4581	15.7254	17.6801	17.2611	19.4442	15.2624	9.97368	14.2229	15.2133	6.78497	11.2701	14.3653	19.0079	18.8338	16.3106
205	(unk) (Unknown)-998.6-Ath	29.2559	38.6646	32.5682	25.4969	13.6822	14.0979	16.9277	13.7579	11.8959	7.7586	10.1839	12.0869	5.21267	9.34165	8.97654	15.3483	14.3697	20.3745
206	(unk) (Unknown)-1045.6-Ath	41.4502	50.4992	56.8017	23.6316	20.0849	11.6229	15.5715	9.44096	8.41539	3.23627	8.15005	5.87768	4.46932	5.95218	11.4333	11.6411	5.87273	5.84901
207	(unk) (Unknown)-1052.5-Ath	15.2956	31.1008	37.54	16.9897	11.6033	10.4044	12.4437	11.35	7.33164	10.6501	7.79112	16.406	19.9153	12.9792	11.8612	24.7056	25.1755	16.4567
208	(unk) (Unknown)-1095.6-Ath	11.9371	20.8287	10.6676	18.5574	16.4134	8.49907	28.6175	19.1212	21.9442	14.1745	8.71605	24.4127	4.47708	9.54769	12.3318	22.2364	25.373	22.1447
209	(unk.x) (Unknown)-1127.7-Ath	4.102	9.14122	6.73738	4.46295	2.75128	2.11943	7.67655	3.78567	2.93844	10.2516	4.83964	11.348	13.7952	27.895	15.5254	59.7117	51.5872	61.3313
210	(unk) (Unknown)-1137.8-Ath	7.2428	9.82612	7.01689	9.40227	7.13448	3.63672	9.76999	8.27057	5.23733	8.84607	9.95453	12.9793	12.9479	20.1603	13.3433	51.791	44.654	57.7865
211	(unk) (Unknown)-1182.6-Ath	5.16046	7.69485	5.4217	7.70677	5.68525	2.52325	9.40697	6.38517	4.45891	7.843	6.98993	13.9031	13.5328	26.7853	15.5813	56.35	46.4595	58.1117
212	(cpd.b) (Unknown)-1186.0-Ath	22.9608	24.4847	22.4356	19.105	14.4092	11.4097	18.9102	13.0259	10.7306	9.00082	12.5449	19.8439	9.85366	18.3635	13.3693	20.1695	17.1717	22.211
213	L5 (m/z=432.239799; rt=1.36442)	7.91768	6.78191	12.0514	9.58026	7.74152	10.0149	10.506	7.3206	15.5881	5.24017	8.73843	10.1983	10.3488	13.699	8.44052	56.4071	55.7186	43.7067
214	L6 (m/z=432.232293; rt=1.36462)	7.84934	6.82909	12.0817	9.6296	7.86531	10.1131	10.6036	7.43995	15.8018	5.47744	8.75723	10.3459	10.2608	13.6444	8.5648	56.1792	55.464	43.0927
215	L2 (m/z=433.238775; rt=1.36419)	7.90351	7.7688	12.46	10.0397	7.49763	9.33291	9.82754	7.06827	16.0171	4.68199	7.6863	8.84683	10.8913	14.0674	8.54613	56.656	55.9116	44.797
216	L3 (m/z=415.213114; rt=1.36432)	10.6484	8.97062	16.1512	13.4725	9.69751	10.2781	11.0474	10.2367	17.705	4.78078	9.15381	10.7458	9.09423	12.999	7.9023	50.9568	48.9424	37.2177
217	L4 (m/z=415.209739; rt=1.36442)	10.6484	8.97062	16.1512	13.4725	9.69751	10.2781	11.0474	10.2367	17.705	4.78078	9.15381	10.7458	9.09423	12.999	7.9023	50.9568	48.9424	37.2177
218	L1 (m/z=433.244077; rt=1.36412)	8.12138	7.73339	12.3316	9.95153	7.46345	9.15894	9.74124	7.03605	15.7185	4.65807	7.65126	9.00755	10.7956	14.0664	8.40091	56.7321	56.0495	45.3824
219	L10 (m/z=415.212785; rt=1.3724)	11.5954	8.86611	16.1512	8.38037	11.2802	10.2781	12.0299	10.1174	17.705	4.96588	9.04716	10.7458	9.90305	12.8475	7.9023	53.1254	47.8417	37.2177
220	L8 (m/z=460.27098; rt=1.36859)	20.2553	15.8513	26.0013	16.5127	12.9862	15.8203	13.0208	10.4448	19.4988	6.0298	10.258	10.482	8.70638	13.2424	7.60786	35.475	37.2173	20.5898
221	L9 (m/z=460.26284; rt=1.36879)	20.0107	15.8689	26.0435	16.4497	12.9674	16.0541	12.8966	10.3955	19.5255	6.09379	10.1693	10.5976	8.62691	13.0454	7.66701	35.9223	37.5533	20.1123
222	L7 (m/z=461.2742; rt=1.36848)	19.7494	14.5641	25.1355	16.5914	14.4484	15.1487	13.8191	10.6127	19.1486	5.72552	9.5786	10.7562	8.76334	13.5085	8.8352	35.3511	37.2877	20.9758
223	L11 (m/z=294.20681; rt=1.97812)	10.6807	7.87864	13.9099	10.8402	11.7396	7.78666	13.982	12.2327	14.7672	11.8979	14.5602	13.5364	16.1605	23.9502	15.8901	36.4386	29.6386	34.1097
224	L15 (m/z=674.41431; rt=2.5047)	3.75978	4.92021	4.37962	4.0654	4.16829	2.11132	6.12176	4.5873	4.62255	3.30622	8.27673	5.56917	9.78928	15.4867	7.86804	72.9576	62.5608	75.4493
225	L13 (m/z=675.418001; rt=2.50431)	4.22664	4.1166	4.36596	4.17821	3.7136	2.05132	7.07033	4.89115	4.8482	3.57493	8.79796	5.68551	10.045	15.2261	8.03227	70.9049	63.2546	75.0167
226	L14 (m/z=674.38601; rt=2.50455)	3.62882	5.15716	4.26598	3.91664	4.04539	1.90883	6.19546	4.64997	4.43739	3.12007	8.06628	5.80789	9.60034	15.7948	7.86002	73.5387	62.2864	75.7199
227	L12 (m/z=675.401071; rt=2.50425)	4.20272	4.08322	4.42198	4.14034	3.69824	2.06895	7.20216	5.04525	4.85253	3.37968	8.88797	5.75755	9.82276	15.2411	8.13326	71.2523	63.0442	74.7657
228	L16 (m/z=813.522831; rt=2.60859)	7.94646	5.69551	4.26257	11.6182	8.39774	5.56481	10.2516	6.70629	5.83797	13.9893	9.56803	5.49041	11.4907	11.7991	6.05464	44.7037	57.8333	72.7896
229	L17 (m/z=812.519897; rt=2.61006)	5.83662	4.37945	3.59718	6.86574	4.90049	2.95572	7.07222	4.51194	4.26054	5.935	8.66949	7.22774	13.7929	16.0457	9.13696	60.4975	61.4929	72.8219
230	L19 (m/z=830.507539; rt=2.71645)	7.36298	11.7123	7.56309	7.3468	10.3418	4.92192	6.07638	7.08847	6.62829	8.11317	7.95353	7.20711	10.7005	16.1359	9.65231	60.4001	46.7681	64.0273
231	L18 (m/z=830.53023; rt=2.71631)	6.89253	10.3148	6.25648	7.00256	9.83054	4.72851	5.70696	9.90556	5.72534	7.51225	8.57258	6.55544	10.8942	14.7243	8.84437	61.9915	46.6523	67.8899
232	L20 (m/z=864.49964; rt=2.74845)	5.97248	6.39053	7.25452	8.00031	6.02061	3.7002	7.93513	7.38725	6.2972	6.78948	10.9653	8.89394	13.9311	22.0499	13.4705	57.3715	47.1864	60.3836
233	L21 (m/z=864.502834; rt=2.7485)	5.97248	6.39053	7.25452	8.00031	6.02061	3.7002	7.93513	7.38725	6.2972	6.78948	10.9653	8.89394	13.9311	22.0499	13.4705	57.3715	47.1864	60.3836
234	L22 (m/z=688.425974; rt=2.74915)	11.6588	13.0272	13.33	12.6461	9.05376	5.72492	12.8524	9.09031	7.1877	6.64134	11.2403	8.07977	14.0208	17.4488	8.54875	42.1805	40.1396	57.1288
235	L24 (m/z=1002.610193; rt=2.84661)	10.6735	7.95804	8.14128	11.8779	6.1443	8.07989	9.65119	11.9831	7.06561	9.50796	7.81525	9.57771	13.3835	13.4654	11.5141	44.906	52.634	55.6214
236	L23 (m/z=1002.572972; rt=2.84612)	12.767	7.66858	8.99013	14.2078	7.37397	8.56226	11.3062	11.6786	8.727	3.91199	7.98624	10.0562	14.0537	13.2543	11.5121	43.7533	52.0383	52.1523
237	L28 (m/z=674.414661; rt=2.8716)	3.68405	4.25524	4.39918	4.03255	3.90513	2.11289	6.44432	4.94335	4.89882	3.96472	8.31383	6.21674	10.6918	16.5404	8.49695	71.1826	62.0421	73.8754
238	L29 (m/z=674.413565; rt=2.90488)	3.0534	4.42409	4.54582	3.28351	3.78452	1.75403	5.10372	4.18379	5.24207	6.09426	9.2511	7.18071	10.8269	16.9137	8.76087	71.6382	61.4428	72.5165
239	L31 (m/z=812.519841; rt=2.94205)	5.94833	6.42877	4.87243	3.44598	4.65924	2.49773	7.98135	8.80359	5.21183	5.15497	9.10324	6.7638	13.6566	18.8282	8.73267	63.8128	52.177	71.9215
240	L25 (m/z=675.418267; rt=2.87114)	3.48147	4.11721	4.58662	3.8585	4.41335	2.39571	6.20033	5.01575	4.96941	3.44801	8.10387	6.23689	10.9715	16.6544	8.15141	72.0402	61.6954	73.66
241	L26 (m/z=675.409564; rt=2.87128)	3.48147	4.11721	4.58662	3.8585	4.41335	2.39571	6.20033	5.01575	4.96941	3.44801	8.10387	6.23689	10.9715	16.6544	8.15141	72.0402	61.6954	73.66
242	L27 (m/z=674.386117; rt=2.87155)	3.93534	4.25157	4.46231	4.12366	3.92019	2.08637	6.13916	5.25457	4.81174	3.96845	8.05463	6.22753	10.3133	16.9167	8.62114	71.5201	61.6023	73.7909
243	L30 (m/z=813.52333; rt=2.93787)	7.79817	8.87015	5.27193	7.86391	6.71909	5.45471	7.70877	6.92803	6.63543	8.47437	7.46739	8.39887	14.025	21.917	9.26847	54.1298	48.0984	64.9706
244	L32 (m/z=658.419288; rt=2.99569)	3.64893	4.90212	2.85946	4.35493	3.1935	1.54891	6.78678	4.17068	3.21113	4.05587	6.48226	4.17066	9.26742	10.9077	5.55084	71.8861	70.3438	82.659
245	L33 (m/z=810.505458; rt=3.00466)	7.97732	4.36228	4.05479	9.64853	3.95877	2.83232	7.49352	4.52226	4.80342	5.48962	7.82757	6.71916	11.0031	17.1697	8.03536	58.3879	62.1594	73.555
246	L34 (m/z=814.536705; rt=3.09915)	4.49876	6.74094	5.78543	5.2379	9.0178	5.92055	8.66782	7.22473	6.36377	3.96868	8.98232	5.76055	11.0956	14.472	7.53923	66.5312	53.5622	68.6305
247	L35 (m/z=686.451472; rt=3.19106)	4.27767	4.66186	4.33409	4.05791	3.2871	1.8855	7.26125	4.68794	4.5006	3.70392	7.91139	6.0322	10.9764	14.9962	6.73831	69.7229	64.4555	76.5093
248	L36 (m/z=686.431372; rt=3.19114)	4.18662	4.89128	4.4916	4.09566	3.23544	2.09442	7.42546	4.95849	4.63047	3.73845	7.92323	6.17492	11.2551	15.2864	7.76012	69.2988	63.7052	74.8485
249	L37 (m/z=848.508507; rt=3.2258)	6.7147	4.14674	4.3861	6.51678	3.67097	2.23096	9.92184	5.43095	5.31038	10.8156	7.32665	4.50684	12.9006	15.4531	7.26559	53.1304	63.9716	76.3001
250	L38 (m/z=691.414075; rt=3.2267)	15.1331	19.954	23.2936	16.5775	11.7082	13.8692	11.6502	10.7712	12.9523	8.64793	12.9037	11.9982	14.6547	16.9948	11.7194	33.3366	27.6681	26.1674
251	L46 (m/z=702.445824; rt=3.2722)	4.52428	5.35365	6.11858	4.90272	4.22346	2.62856	7.19481	5.66727	6.31609	4.12109	9.05971	7.04345	10.8143	17.1344	9.39956	68.4428	58.5616	68.4938
252	L39 (m/z=702.44637; rt=3.26054)	4.51795	5.39602	6.10248	4.89586	4.22157	2.62164	7.18475	5.66473	6.29948	4.25515	9.05565	7.02493	10.7992	17.1267	9.37484	68.3471	58.5353	68.5766
253	L40 (m/z=702.422998; rt=3.26067)	4.60113	5.5272	6.31826	5.2233	4.54243	2.82897	7.28337	5.94005	6.60133	4.59469	9.35722	7.36128	11.2785	17.4278	9.86778	67.019	57.2053	67.0224
254	L52 (m/z=840.519244; rt=3.33556)	9.66133	7.15115	5.36297	9.80871	7.52178	5.96435	11.8443	5.95603	6.88058	8.63738	9.39735	7.70749	11.1676	11.7145	8.16768	48.8807	58.2592	65.9169
255	L42 (m/z=690.438041; rt=3.26458)	17.5408	20.6881	33.6944	21.0289	15.6473	12.9353	19.3251	15.9808	15.575	7.5864	18.2164	12.8603	13.4268	15.895	7.81782	21.092	13.5724	17.1172
256	L43 (m/z=690.424139; rt=3.26604)	17.4809	21.0829	34.2525	21.2718	15.7797	12.8992	19.316	15.8238	15.7168	7.95076	18.5654	12.9673	13.3888	15.7158	7.71379	20.5918	13.0323	16.4504
257	L41 (m/z=691.441895; rt=3.26165)	18.0985	22.2766	29.6468	20.2993	14.1462	16.0655	18.9998	14.9104	14.2826	9.02974	13.2945	12.3191	14.5725	22.4855	9.27963	19.0001	12.8868	18.4064
258	L44 (m/z=898.541856; rt=3.26742)	14.5608	13.1629	10.1664	13.542	12.8047	10.4898	13.0771	12.3767	14.9766	14.6663	15.1406	14.0835	15.072	17.2672	19.1843	29.0818	29.2479	31.0993
259	L45 (m/z=724.478956; rt=3.27052)	20.5323	17.287	36.3414	19.929	18.4503	11.3042	14.9852	19.6614	13.1529	9.76276	12.7135	13.2241	14.4842	17.0055	9.96593	20.3066	14.8823	16.0116
260	L49 (m/z=724.453004; rt=3.27522)	18.5239	18.8627	31.3065	17.6185	19.2617	12.6603	12.1577	15.1849	11.1345	9.00947	10.3623	13.7846	14.1662	17.6684	10.779	28.5241	18.6599	20.335
261	L47 (m/z=722.466054; rt=3.2742)	23.7774	29.5741	47.5592	34.8196	19.7966	18.6804	18.0685	16.8135	14.1849	6.78052	14.9359	13.3121	10.6362	14.9052	3.42468	5.91777	3.97475	2.83881
262	L48 (m/z=722.462988; rt=3.27425)	23.7774	29.5741	47.5592	34.8196	19.7966	18.6804	18.0685	16.8135	14.1849	6.78052	14.9359	13.3121	10.6362	14.9052	3.42468	5.91777	3.97475	2.83881
263	L50 (m/z=828.545524; rt=3.29643)	17.9818	12.677	14.322	17.0151	9.72628	8.52365	16.2491	11.8739	11.9022	8.85305	9.17417	12.1063	15.8505	14.5779	6.35179	24.0505	41.9706	46.794
264	L51 (m/z=840.55273; rt=3.33359)	6.99389	5.2523	3.93506	10.0719	5.91488	4.29065	7.35765	4.09996	4.31325	7.94178	8.52771	6.76611	12.0919	12.3511	8.80345	55.5429	63.8541	71.8915
265	L72 (m/z=796.525378; rt=3.4493)	4.55057	4.75162	5.16289	4.78506	4.40497	2.90646	5.56894	6.0342	6.4037	4.52548	8.79085	6.58398	10.941	14.5474	9.49836	69.629	61.4709	69.4446
266	L73 (m/z=796.485776; rt=3.4494)	6.99111	4.83801	7.06603	6.37803	4.9891	5.99155	5.98824	6.44209	5.80637	4.98309	9.96102	7.48079	10.6003	14.262	9.52849	65.0592	59.5077	64.1268
267	L62 (m/z=799.464691; rt=3.38856)	9.71562	9.97723	11.192	7.36882	7.54134	6.21679	7.18784	7.04049	11.483	8.30404	16.6518	17.8267	14.1426	20.1951	17.8101	53.2811	38.5941	35.4714
268	L71 (m/z=810.504433; rt=3.42113)	4.16648	2.55267	3.15046	6.4423	2.79212	1.76119	4.1435	3.70836	3.83035	4.99282	6.35692	5.71548	9.55418	15.3355	8.41719	70.7007	69.2544	77.1253
269	L54 (m/z=794.509626; rt=3.37348)	5.07604	4.77445	5.05959	5.81412	5.37555	2.36751	6.18661	4.76934	5.06025	3.97684	8.41136	7.17639	14.2989	21.3512	7.99541	64.6474	55.3181	72.3408
270	L53 (m/z=794.478158; rt=3.37347)	6.9056	5.86592	6.51144	6.74769	6.22132	2.81976	5.38113	5.99914	5.44947	3.77678	8.68846	8.57841	15.9449	23.2582	8.30691	61.2439	49.967	68.334
271	L55 (m/z=795.488329; rt=3.37397)	9.97526	8.80345	6.65188	11.2912	8.12206	6.46683	7.95299	6.99613	5.64484	12.9037	11.2651	6.85682	15.8971	15.0597	8.11104	41.9798	49.7536	66.2686
272	L56 (m/z=795.51436; rt=3.37446)	8.43044	8.16446	6.03923	8.89244	8.64782	4.71983	7.16675	6.51731	4.97788	10.4951	10.8353	6.67532	17.19	14.6067	8.15556	47.8253	51.2283	69.4322
273	L58 (m/z=284.331802; rt=3.38021)	16.5063	10.461	11.5401	8.57449	11.2389	7.38819	9.94996	7.94064	14.9903	5.47355	8.51153	11.39	22.8689	32.1591	41.7379	36.6268	29.6889	12.9536
274	L57 (m/z=284.328677; rt=3.38003)	16.1422	10.4636	11.36	8.69142	11.4838	7.4099	9.8391	8.04607	14.9288	6.51621	8.70066	11.8777	23.0534	32.274	41.953	35.7577	29.0319	12.4707
275	L59 (m/z=664.42159; rt=3.38503)	20.0243	22.7075	30.8608	27.3058	15.2264	15.0671	20.7763	16.9126	15.2501	8.39274	16.2456	14.9299	8.74253	16.582	9.20767	14.7583	12.3259	14.6843
276	L60 (m/z=664.402075; rt=3.38509)	19.8072	21.2191	34.5043	29.1147	16.9956	14.1882	20.9389	18.1275	14.9721	8.18336	16.415	13.8826	8.65631	15.2495	9.16845	13.2996	11.9933	13.2844
277	L61 (m/z=898.541738; rt=3.38554)	11.4871	13.3249	11.3457	11.8671	11.8352	8.27061	12.9968	10.6818	12.9104	11.1211	14.6868	14.6017	14.5296	13.2445	15.2952	37.9982	36.2269	37.5764
278	L64 (m/z=722.463131; rt=3.39946)	21.7822	20.4035	28.7436	21.6036	16.6634	12.1369	19.073	14.1709	16.1926	6.69771	14.5432	14.242	11.4006	15.9779	10.7463	19.4429	18.241	17.9387
279	L65 (m/z=722.466486; rt=3.39949)	21.7822	20.4035	28.7436	21.6036	16.6634	12.1369	19.073	14.1709	16.1926	6.69771	14.5432	14.242	11.4006	15.9779	10.7463	19.4429	18.241	17.9387
280	L63 (m/z=722.491438; rt=3.39937)	20.809	19.1903	27.8516	21.25	16.0173	11.9247	18.6145	13.6986	15.8057	7.3407	13.7812	13.7303	10.6847	16.2629	11.5099	21.3011	21.0497	19.1778
281	L66 (m/z=723.467148; rt=3.39962)	22.6021	21.0839	27.9304	21.5345	16.2358	11.6143	18.8559	14.8631	17.0932	6.37814	14.9879	14.2488	11.2108	15.1425	11.892	19.4185	17.6869	17.2212
282	L67 (m/z=361.232647; rt=3.40037)	22.3659	20.7376	26.3642	20.9899	16.5781	13.9632	19.4661	14.1875	16.4416	9.94553	16.0717	15.5105	10.8241	18.1466	11.6304	16.4085	14.2785	16.0901
283	L68 (m/z=838.538327; rt=3.40692)	18.725	17.0933	12.9678	19.4542	13.7024	13.3138	16.2387	14.3432	14.5615	9.26272	14.2767	12.3942	9.8994	16.322	9.28672	26.4199	24.2623	37.476
284	L69 (m/z=801.485502; rt=3.42084)	9.4018	11.0247	8.43992	10.7866	10.1376	10.2362	11.2318	8.6231	15.1723	17.0852	14.0183	15.1895	16.1311	18.8188	15.2955	35.3635	37.3776	35.6665
285	L70 (m/z=801.462625; rt=3.42084)	8.6665	10.8672	7.84615	9.61331	12.3783	6.86551	11.7674	7.59836	15.7354	16.5669	13.9497	16.3645	17.1762	18.0372	16.4533	36.2097	37.1692	36.7351
286	L88 (m/z=986.586301; rt=3.48328)	5.94478	4.76282	5.42349	7.41253	6.39531	4.96994	7.1694	5.89016	8.01261	6.52758	10.6207	8.99634	12.1592	17.6661	13.0623	60.7866	54.6649	59.5353
287	L86 (m/z=986.618012; rt=3.4831)	5.71747	4.57882	5.26946	7.28941	7.7066	4.67962	6.89526	5.65978	7.53042	6.40457	10.111	8.59933	12.0602	17.1384	12.6698	61.633	54.8054	61.2514
288	L91 (m/z=984.579967; rt=3.50054)	6.68649	6.27462	6.05913	7.3442	5.38973	5.45174	8.95997	5.74896	7.56776	6.75488	11.1648	8.05443	12.7983	18.1168	14.1368	57.4561	53.3051	58.7301
289	L92 (m/z=984.600309; rt=3.50095)	6.5555	6.21344	6.05913	9.15935	6.31218	5.45174	8.78445	5.6929	7.56776	6.62255	11.0559	8.05443	12.5476	17.9401	14.1368	56.3306	52.7854	58.7301
290	L74 (m/z=797.52938; rt=3.4503)	4.95409	5.42149	6.23242	7.0362	5.29614	3.737	6.48582	5.94073	8.22568	5.68642	8.42651	6.40769	8.1516	14.8823	10.3356	67.6859	60.0328	65.0616
291	L96 (m/z=815.460007; rt=3.54218)	4.62096	7.40733	8.27625	7.7577	6.7221	4.41391	11.3957	5.97587	10.5078	7.79269	12.7789	12.3491	16.2526	20.7168	15.8977	52.1804	46.399	48.5552
292	L75 (m/z=812.519826; rt=3.45977)	4.41403	3.14615	3.6905	3.6059	3.66651	2.13701	4.60512	3.85567	5.0389	9.3899	7.17415	5.69835	9.73788	13.0118	8.91735	68.2472	69.1458	74.5179
293	L79 (m/z=987.581683; rt=3.48078)	6.56702	7.14896	7.81153	5.71975	5.03924	6.02834	9.82166	9.15908	9.47428	8.22871	12.8599	11.5947	11.2422	16.7611	11.4749	58.4207	49.0318	53.6163
294	L80 (m/z=987.617111; rt=3.48109)	6.74147	6.8266	7.87925	6.15191	5.3311	5.67264	9.27079	9.05191	8.90805	7.78113	11.0843	9.25576	11.4906	16.012	11.1747	58.5641	51.6941	57.1096
295	L76 (m/z=814.525245; rt=3.46649)	12.768	9.5636	9.42943	12.3295	10.4312	7.07295	5.61902	7.23537	7.31208	6.73657	9.70629	9.54619	8.41562	12.2642	9.72978	54.1313	50.7993	56.9096
296	L78 (m/z=814.498689; rt=3.47805)	18.775	12.2998	10.1115	18.1301	13.4157	8.89674	5.82658	8.47344	6.75776	9.33161	9.73169	9.6691	9.99476	12.3732	12.0748	37.9419	43.7061	52.4901
297	L77 (m/z=822.553506; rt=3.4779)	18.5689	17.3215	23.6261	17.6936	15.2727	9.15237	22.6262	14.9151	11.2084	12.2399	16.162	12.5218	10.9189	16.8991	9.6558	17.9524	19.4295	33.8355
298	L82 (m/z=652.423088; rt=3.48127)	26.2112	27.3963	40.5216	33.2958	18.6433	17.2775	19.1174	17.6519	16.149	8.22594	16.7198	12.5691	7.88281	16.0393	9.39296	5.26688	3.54941	4.08974
299	L81 (m/z=652.407087; rt=3.48112)	26.1203	27.347	40.5034	34.0319	18.7417	17.5582	18.888	17.7963	16.1254	8.17705	16.7451	12.6768	7.73791	16.0246	9.37174	5.04477	3.3453	3.76451
300	L83 (m/z=748.477682; rt=3.48207)	15.7573	17.8706	26.3745	19.2085	19.8656	15.348	17.6665	15.9529	14.9296	12.1779	12.9838	13.5279	13.8782	17.2417	15.7845	21.3116	16.0854	14.0355
301	L87 (m/z=680.452926; rt=3.48321)	24.2301	23.9303	32.6328	24.4631	16.6345	13.7031	17.468	14.7743	15.0233	9.46186	15.1021	13.4368	9.55538	16.2134	9.06663	14.8215	13.3455	16.1373
302	L89 (m/z=680.432893; rt=3.48356)	24.8592	24.2177	33.465	24.8211	17.3661	14.4807	17.5663	14.7747	15.5768	9.57427	15.3688	13.6032	9.47815	15.8701	8.88597	13.701	12.4026	13.9883
303	L84 (m/z=681.458616; rt=3.48283)	24.5755	23.1428	33.4267	25.1061	15.333	12.2742	16.2908	15.1355	16.0393	9.77521	15.3149	13.1481	9.3005	17.2381	8.7972	14.9519	13.8357	16.3145
304	L85 (m/z=681.443033; rt=3.48288)	24.6755	23.1092	33.6674	25.555	15.3815	12.8477	16.5309	15.4885	16.0826	9.71249	15.2057	13.2265	9.34918	17.4894	8.74455	14.1769	13.3257	15.4312
305	L90 (m/z=836.537757; rt=3.49571)	22.5713	23.4281	26.7418	17.7504	12.3998	11.427	14.8951	16.6399	15.3546	11.0782	17.3183	12.6022	14.2602	17.0685	12.9706	19.4449	13.1455	20.9037
306	L100 (m/z=842.514619; rt=3.54818)	12.4611	13.1974	18.4036	13.6252	10.0398	8.27308	12.9992	10.2657	13.3136	6.6669	13.5418	14.2575	15.2058	21.4938	14.136	39.0419	31.4614	31.6162
307	L97 (m/z=842.549188; rt=3.54747)	12.2645	12.1622	18.1392	13.29	9.93564	7.90581	13.057	9.38556	12.9374	6.69676	13.0629	14.1526	14.6248	21.3445	14.0185	40.067	34.1092	32.8465
308	L99 (m/z=843.517242; rt=3.54795)	12.1287	11.6474	19.9727	14.7843	10.8438	8.2114	13.7403	9.58202	12.3306	6.38276	13.962	13.0727	14.3974	23.4024	16.6075	38.5666	30.5624	29.8052
309	L98 (m/z=843.536121; rt=3.54766)	11.9228	11.6512	19.8188	14.6585	10.565	8.14803	13.3358	9.11582	12.1088	6.62979	13.3141	12.8653	14.2192	23.7956	16.3888	39.2339	31.5583	30.6703
310	L93 (m/z=678.447089; rt=3.52906)	11.0025	11.3116	11.753	12.8432	8.84623	6.20609	10.6821	7.77873	10.4574	4.5807	11.3183	9.80941	12.6159	15.9089	13.0225	48.2756	44.8362	48.7517
311	L94 (m/z=678.444946; rt=3.52915)	11.0025	11.3116	11.753	12.8432	8.84623	6.20609	10.6821	7.77873	10.4574	4.5807	11.3183	9.80941	12.6159	15.9089	13.0225	48.2756	44.8362	48.7517
312	L95 (m/z=678.459161; rt=3.52933)	10.3489	10.0976	12.2884	11.5859	7.95246	5.53234	10.5411	7.30236	9.65543	4.70968	11.2835	9.35979	12.412	16.7976	12.503	50.4024	46.5665	50.6611
313	L101 (m/z=421.258625; rt=3.54877)	12.82	13.6898	20.8227	14.6962	10.6442	9.258	14.4873	10.1279	14.9492	8.89968	14.2861	14.1802	15.3742	21.2662	13.8612	33.7226	29.9857	26.9288
314	L102 (m/z=722.463432; rt=3.56588)	24.8508	23.4785	39.2585	32.965	19.8642	15.8781	21.9021	16.0495	15.0306	5.9084	15.308	11.8045	9.47854	19.8613	12.2847	4.89506	5.43851	5.74371
315	L110 (m/z=722.466597; rt=3.57492)	24.6553	23.4003	39.2585	32.7057	19.7981	15.8781	21.7299	15.996	15.0306	5.86192	15.257	11.8045	9.40398	19.7951	12.2847	5.64318	5.7535	5.74371
316	L116 (m/z=722.455676; rt=3.58788)	23.4926	23.4292	37.6729	33.1622	20.6772	15.9172	21.9376	16.5491	16.1488	6.37359	14.9622	12.2385	8.92726	18.0736	11.7062	6.10669	6.30862	6.31636
317	L109 (m/z=722.447593; rt=3.57491)	24.9352	23.9017	39.0695	32.8455	19.7921	15.7007	21.5866	15.7236	15.0722	5.82046	15.2465	11.9198	9.44963	19.4139	12.331	5.36268	5.9223	5.90685
318	L103 (m/z=722.490808; rt=3.56606)	22.1368	20.8703	41.5643	29.7009	21.8498	16.7749	22.6675	19.5507	14.9344	5.83915	12.587	12.2962	10.7736	16.7573	8.12853	8.88207	8.3849	6.30164
319	L104 (m/z=593.278874; rt=3.57045)	7.16408	5.39438	8.523	5.92947	7.56506	3.62393	11.4339	6.50507	7.91586	4.65924	5.07274	9.13639	7.58359	19.4022	13.4111	63.2298	56.0606	57.3897
320	L105 (m/z=593.259852; rt=3.57047)	7.15487	5.61718	8.5151	5.82571	7.7363	3.48729	11.3667	6.7406	7.94386	5.18488	4.83564	9.21625	7.84827	19.9572	14.1972	62.6196	55.113	56.6403
321	L106 (m/z=594.284807; rt=3.57066)	7.03735	6.84682	11.4157	5.05228	7.9417	4.10868	11.2999	6.52711	8.24199	5.15002	4.51937	8.37228	7.21586	18.3873	12.7485	64.2446	55.7777	55.1129
322	L107 (m/z=594.274306; rt=3.57068)	7.04198	6.8812	11.5532	5.0556	7.98157	4.15818	11.3073	6.55988	8.34129	5.1534	4.54206	8.47315	7.2206	18.4796	12.9021	64.2211	55.5557	54.5721
323	L114 (m/z=795.5146; rt=3.58173)	5.28941	4.12774	4.49486	6.10275	5.5997	3.4609	7.27578	5.58777	4.84213	7.68249	9.79188	7.06146	10.1735	14.6192	8.74809	63.4761	60.2737	71.3925
324	L111 (m/z=794.509588; rt=3.57706)	3.76732	4.24608	3.82524	4.39511	3.38546	2.62444	6.29543	4.37691	4.53023	3.60469	6.64052	5.51332	9.63962	16.1177	7.70988	72.2978	65.2334	75.7969
325	L108 (m/z=792.494557; rt=3.57434)	5.22845	3.82395	2.25755	6.48508	5.65192	3.07411	4.80932	5.2376	3.02426	5.71314	7.29872	5.34346	8.03042	11.1191	10.5964	69.7336	66.8687	75.7042
326	L112 (m/z=795.488414; rt=3.58165)	6.90566	3.40681	4.10344	7.96752	5.56334	4.63776	7.18686	6.08807	4.73014	10.03	9.85561	6.63364	8.78255	14.4835	9.53012	59.1274	60.6027	70.3649
327	L115 (m/z=794.478452; rt=3.58337)	4.02971	4.58316	4.25812	3.59693	4.4186	2.50749	6.12521	4.3268	4.33347	4.47646	6.19994	5.26231	8.93512	15.9539	7.75367	72.8366	64.5176	75.8849
328	L113 (m/z=748.478106; rt=3.58171)	12.4766	19.7616	17.9889	13.0989	14.5715	12.843	16.5298	14.6739	15.4416	13.0126	14.7935	13.9634	18.5693	16.5276	18.1317	26.3129	19.6719	21.6314
329	L117 (m/z=792.494438; rt=3.60603)	5.74243	4.49345	4.09857	6.27206	4.10389	2.73647	5.58866	4.77894	5.04776	5.31181	6.69265	5.31907	8.89198	14.1789	8.67369	68.1931	65.7522	74.1244
330	L128 (m/z=1002.610012; rt=3.62033)	5.33059	4.47773	4.48381	5.98211	3.7907	2.86994	6.47494	6.17283	5.59531	7.66653	8.78894	8.56898	11.5126	17.7513	10.1525	63.0332	59.0186	68.3295
331	L127 (m/z=1002.57197; rt=3.61837)	5.49133	4.73167	4.63677	5.93566	3.93435	3.12498	6.37057	6.41416	5.84481	8.75245	8.56825	9.02937	12.4451	18.1767	10.4035	61.0049	58.1749	66.9606
332	L129 (m/z=806.48662; rt=3.62504)	11.6114	5.6705	7.26229	11.7475	6.79819	5.34228	8.66283	7.20128	5.0361	8.67701	12.1111	10.4203	17.0258	23.0864	10.666	42.2754	45.1326	61.273
333	L119 (m/z=690.439425; rt=3.61312)	22.2352	22.1873	32.9421	23.3555	16.9546	15.3724	18.4962	14.1294	17.6015	9.51533	17.3097	13.4209	11.5806	17.4602	9.06745	14.8171	11.9588	11.5957
334	L120 (m/z=690.43743; rt=3.61394)	22.2352	22.1873	32.9421	23.3555	16.9546	15.3724	18.4962	14.1294	17.6015	9.51533	17.3097	13.4209	11.5806	17.4602	9.06745	14.8171	11.9588	11.5957
335	L121 (m/z=690.426556; rt=3.61581)	22.0625	22.093	32.2661	24.1221	17.4711	15.0686	18.5664	14.1976	17.6195	9.32724	17.7074	14.2115	11.4011	17.5966	8.64255	14.5206	10.9343	12.1917
336	L118 (m/z=690.463634; rt=3.61108)	27.5393	24.8402	40.2884	21.1983	17.5698	14.3264	25.3301	16.706	17.6981	11.7484	17.8809	13.6714	4.70962	8.3011	0.752357	9.47431	14.7019	13.2634
337	L126 (m/z=638.444823; rt=3.61746)	22.8557	20.6196	31.3033	22.9793	16.0714	12.8493	18.0878	14.3487	15.5537	8.45422	14.7279	13.9125	10.362	18.0895	9.60702	17.261	16.1428	16.7742
338	L124 (m/z=638.430416; rt=3.61718)	23.1041	20.6953	31.1169	22.9813	16.2453	13.0246	18.1576	14.5603	15.6448	8.5021	14.8741	14.0024	10.3756	17.9867	9.59162	16.8793	15.6383	16.6197
339	L123 (m/z=639.437999; rt=3.61699)	22.2331	21.6222	30.8966	25.372	16.4635	13.637	20.0326	15.3531	16.6964	7.94635	14.6435	13.2579	9.05578	17.515	9.84355	15.3602	14.4027	15.6687
340	L125 (m/z=639.45025; rt=3.61718)	22.2331	21.6222	30.8966	25.372	16.4635	13.637	20.0326	15.3531	16.6964	7.94635	14.6435	13.2579	9.05578	17.515	9.84355	15.3602	14.4027	15.6687
341	L122 (m/z=319.221655; rt=3.61677)	22.8031	20.4777	32.51	23.9118	17.0503	12.9718	18.5733	15.1477	15.6245	8.00444	14.1126	13.7981	9.40476	18.1085	9.41421	17.3026	15.1032	15.6813
342	L130 (m/z=706.469389; rt=3.62959)	18.9893	13.521	17.1166	17.886	13.489	11.6956	20.8333	12.3914	11.8994	11.7059	14.8795	9.14975	15.0016	15.3446	10.8349	15.5838	30.3746	39.3037
343	L131 (m/z=844.51624; rt=3.65103)	11.8739	17.1073	22.8059	13.4082	13.3596	11.2146	13.599	11.4911	13.6241	9.41963	11.5532	13.1428	17.4799	17.5012	15.6973	34.2194	28.9876	23.5152
344	L139 (m/z=844.529425; rt=3.65238)	11.8543	15.0064	22.8059	13.386	13.7659	11.2146	13.5765	11.8406	13.6241	9.56945	11.4843	13.1428	17.451	18.0335	15.6973	34.1628	29.8692	23.5152
345	L132 (m/z=402.272308; rt=3.65112)	19.7748	20.6313	18.4645	19.9511	14.4882	17.8249	15.2474	16.3211	16.0532	13.8427	17.333	16.2779	14.3377	16.5272	13.832	16.8462	14.6991	17.5475
346	L136 (m/z=842.513579; rt=3.65223)	13.9456	13.9018	20.8762	15.7185	11.1882	9.87585	14.1789	10.3394	14.3049	6.83575	14.805	13.7584	14.0063	22.5953	14.0777	35.315	27.1703	27.1071
347	L133 (m/z=843.516913; rt=3.65148)	12.9427	13.396	21.6433	16.4308	11.8191	9.13731	14.5567	11.0049	13.6834	8.32148	13.8347	13.4437	14.2215	22.6844	14.817	33.5268	27.261	27.2752
348	L134 (m/z=843.516913; rt=3.65148)	12.9427	13.396	21.6433	16.4308	11.8191	9.13731	14.5567	11.0049	13.6834	8.32148	13.8347	13.4437	14.2215	22.6844	14.817	33.5268	27.261	27.2752
349	L142 (m/z=842.547932; rt=3.65278)	15.8655	14.928	25.7555	17.5307	12.0046	11.1775	15.6869	10.9279	16.0649	6.79995	15.3515	15.2884	13.9293	23.7723	14.2196	30.1878	23.0158	17.494
350	L140 (m/z=843.547498; rt=3.65242)	14.4125	14.1021	24.5681	17.4576	12.0081	10.1538	15.4162	11.1003	14.2253	8.54545	14.1499	13.9451	15.0544	24.6964	15.2552	29.1138	23.9432	21.8525
351	L141 (m/z=421.258836; rt=3.65245)	14.883	13.5951	20.9562	16.604	10.343	10.328	14.4464	11.0783	15.4899	6.93226	15.1072	14.484	14.9212	22.3743	13.2098	32.2132	27.5022	25.5321
352	L144 (m/z=804.543424; rt=3.65345)	24.321	24.2214	29.0746	23.0496	15.7607	15.5519	18.0429	14.7896	15.8943	8.47739	17.5919	14.429	11.7958	14.9098	9.39066	14.3133	12.7266	15.6595
353	L145 (m/z=804.547747; rt=3.65356)	24.321	24.2214	29.0746	23.0496	15.7607	15.5519	18.0429	14.7896	15.8943	8.47739	17.5919	14.429	11.7958	14.9098	9.39066	14.3133	12.7266	15.6595
354	L135 (m/z=805.54641; rt=3.65206)	26.304	21.9623	28.5953	21.1226	15.2046	17.0727	19.7397	15.7639	16.9909	7.28971	18.9769	12.8736	11.3562	13.9714	9.79372	14.1877	14.1209	14.6737
355	L137 (m/z=805.551517; rt=3.65231)	26.304	21.9623	28.5953	21.1226	15.2046	17.0727	19.7397	15.7639	16.9909	7.28971	18.9769	12.8736	11.3562	13.9714	9.79372	14.1877	14.1209	14.6737
356	L189 (m/z=802.530374; rt=3.74937)	33.5649	27.5385	36.7066	19.948	16.727	13.0751	19.0506	15.9844	16.192	6.41276	15.5693	11.4948	7.05603	11.6402	7.87221	13.9677	12.5405	14.6593
357	L138 (m/z=805.583001; rt=3.65238)	24.6118	19.9706	29.9585	20.1553	21.5324	15.555	18.6646	14.9441	14.3739	8.27696	16.258	10.9307	15.5753	13.2097	12.7573	12.7161	14.0852	16.4246
358	L143 (m/z=806.532826; rt=3.65303)	17.681	9.38267	10.6496	15.7747	9.88761	7.05382	14.7592	9.81689	6.97238	9.94967	10.5264	9.66952	14.4226	21.0722	10.298	27.4129	39.3142	55.3567
359	L146 (m/z=804.593287; rt=3.65479)	23.1096	22.0656	23.471	20.8572	16.8019	15.8063	20.0856	14.8997	17.0796	8.86799	15.1658	17.5021	14.4509	18.7862	14.6284	12.6287	12.2807	11.5126
360	L178 (m/z=674.445355; rt=3.69484)	16.7776	19.1551	20.9633	19.9919	12.4755	9.34944	16.9139	11.2549	12.7315	8.37146	14.7197	12.6679	12.7489	15.5844	9.00263	25.1963	26.8104	35.2853
361	L179 (m/z=674.428876; rt=3.69505)	16.985	19.13	20.603	18.8269	12.3873	9.35333	16.9636	11.3006	12.6826	8.28002	15.1405	12.9491	14.4061	15.9826	9.41413	24.5383	26.059	34.9979
362	L147 (m/z=826.529821; rt=3.65753)	16.0473	15.2425	20.9936	16.8409	12.6972	10.3942	16.1681	14.484	13.8045	11.4186	17.1441	12.6058	16.4989	16.6114	12.3987	23.0262	23.8208	29.8032
363	L148 (m/z=826.527052; rt=3.65763)	16.0473	15.2425	20.9936	16.8409	12.6972	10.3942	16.1681	14.484	13.8045	11.4186	17.1441	12.6058	16.4989	16.6114	12.3987	23.0262	23.8208	29.8032
364	L150 (m/z=826.501029; rt=3.65872)	13.3628	14.9032	19.4609	15.2707	13.8986	10.5363	15.6286	15.7493	14.5464	13.4624	17.2156	15.006	21.4078	15.4483	13.2316	20.8676	22.7849	27.2188
365	L177 (m/z=675.446454; rt=3.69394)	14.4753	15.3439	18.7482	18.1503	11.6949	10.7731	15.3679	13.1203	15.2837	10.5277	15.3111	12.9779	17.8492	24.8782	10.9933	23.6295	19.6516	31.2238
366	L149 (m/z=827.531567; rt=3.65863)	19.6856	17.2952	25.4523	17.7444	12.7999	10.8376	19.2335	13.6805	12.8892	8.49295	14.2135	12.1128	15.1359	17.5697	7.65519	19.7076	24.4413	31.0529
367	L151 (m/z=828.543343; rt=3.6615)	18.9151	18.5921	20.2006	16.9885	14.9234	11.4019	11.891	12.5729	13.5668	8.0981	10.2345	8.63184	13.2685	16.5892	10.1567	30.8388	27.0879	36.0421
368	L152 (m/z=980.623051; rt=3.66504)	12.0906	10.0839	13.2068	10.2798	10.6889	8.35438	13.2653	9.94974	9.0722	9.80181	11.0022	10.1198	15.8651	17.2212	15.4521	38.6974	41.0541	43.7946
369	L153 (m/z=981.626353; rt=3.66593)	17.5605	17.3836	12.2981	10.6812	11.5074	11.7338	11.4434	15.4366	12.0418	14.1935	12.279	12.9913	13.8739	14.2418	13.3422	32.2476	29.1516	37.5927
370	L154 (m/z=847.478578; rt=3.66853)	17.0326	15.6719	14.6493	17.8588	12.1521	10.4146	19.6637	11.2251	9.15326	10.956	14.696	10.8976	14.3257	12.3169	9.36919	20.1631	33.938	45.5161
371	L159 (m/z=666.436865; rt=3.67489)	28.1938	29.2004	41.2988	33.7248	20.2382	18.13	19.1437	16.3842	16.2599	7.26116	14.8874	11.5986	6.88907	15.4763	8.5526	4.78744	3.81367	4.16013
372	L162 (m/z=667.441206; rt=3.67492)	28.7648	29.1016	40.9775	33.8025	20.6503	18.0821	18.9525	15.9407	16.49	7.11488	14.7876	11.7552	6.73522	15.5927	8.6079	4.63013	3.92712	4.08733
373	L158 (m/z=666.403687; rt=3.67489)	28.6401	29.6698	41.5449	33.717	20.5195	18.4239	19.4322	16.4036	16.3606	7.17717	14.7862	11.6014	6.63952	15.1781	8.32618	4.3941	3.44277	3.74307
374	L163 (m/z=667.418171; rt=3.67498)	28.5259	28.8102	40.5516	33.277	21.1285	18.4255	19.4647	16.2179	16.6686	7.24624	14.9553	11.8966	6.95154	15.2068	8.62909	4.53465	3.68134	3.82859
375	L164 (m/z=333.2191; rt=3.67498)	28.3965	29.5329	40.9554	33.5903	20.124	18.3994	19.0991	16.6943	16.3634	7.24613	15.0665	11.7752	6.99001	15.0994	8.62735	4.67794	3.4829	3.8792
376	L160 (m/z=668.444418; rt=3.6749)	29.4884	31.6342	41.3039	32.5112	21.2454	19.2461	19.5857	16.6627	18.0132	7.40915	15.6787	13.0004	6.41768	10.8305	4.15646	4.58785	3.94848	4.27981
377	L161 (m/z=668.423692; rt=3.67491)	29.1976	29.7661	38.4717	32.2565	20.552	18.9401	19.8996	15.8045	17.4465	7.56293	14.8935	12.7786	6.57449	15.3919	8.49759	4.50878	3.5921	3.86546
378	L157 (m/z=333.721047; rt=3.67488)	28.5928	29.5088	40.6267	34.2795	20.8795	18.3124	18.9284	15.9943	16.958	7.001	14.7801	11.7317	6.71773	15.4781	8.59539	4.48055	3.35916	3.77575
379	L156 (m/z=222.148424; rt=3.67485)	28.3355	28.9243	41.3243	33.8148	20.6244	18.3599	19.2645	16.3577	16.4537	7.09639	14.7259	11.5356	6.78913	15.6781	8.5384	4.6997	3.68957	3.78808
380	L165 (m/z=688.42026; rt=3.6753)	28.351	30.6649	43.7396	38.5662	23.259	19.5227	20.3457	17.5082	15.4517	5.52518	14.0493	9.23432	4.89844	10.2065	5.67368	2.31349	4.31217	6.37808
381	L167 (m/z=688.439982; rt=3.67712)	28.1679	29.7809	43.3853	37.9603	22.1439	18.2658	19.9206	17.0017	15.0266	5.53232	14.0017	8.91949	4.77553	10.9336	5.60736	3.64336	6.13818	8.79551
382	L182 (m/z=803.533347; rt=3.69832)	25.5982	23.2872	33.1254	30.0518	17.2438	14.7893	19.8121	13.335	17.9422	10.7037	16.1041	12.1224	7.54216	16.937	9.80686	6.292	13.0929	12.2138
383	L181 (m/z=803.52035; rt=3.69823)	25.7917	24.2316	33.1254	30.279	17.9432	14.7893	19.9619	13.8758	17.9422	10.7847	16.7572	12.1224	6.84316	13.5682	9.80686	6.33957	13.6239	12.2138
384	L155 (m/z=222.144679; rt=3.67454)	28.7543	28.1372	40.5903	32.8649	21.7756	19.0906	20.2773	16.6201	17.1622	7.30962	15.0444	11.9041	6.90033	15.2989	8.67534	3.89352	3.12385	2.57742
385	L166 (m/z=834.516117; rt=3.67666)	18.9831	20.6459	20.5691	18.7937	13.3825	12.7448	17.8439	17.3306	13.0484	11.8447	16.9845	11.3488	14.5099	13.6443	10.2595	18.0247	18.0122	32.0295
386	L168 (m/z=711.49339; rt=3.6777)	41.9739	31.6297	38.441	21.0217	16.7837	15.4061	16.2139	11.1116	9.58876	4.36392	8.63111	6.96611	4.65025	7.68222	4.02133	11.7763	24.1617	25.5767
387	L171 (m/z=712.495596; rt=3.68706)	33.1645	36.3447	35.9684	30.7769	16.1963	16.3758	13.1853	10.5099	11.1228	5.74082	8.14193	5.35643	6.23787	6.84416	6.74331	10.8947	21.963	24.4333
388	L183 (m/z=710.451681; rt=3.70975)	8.11428	5.4226	5.85384	7.26104	4.99003	2.96268	9.84659	5.06935	5.19086	4.32163	8.39611	6.33657	12.8101	16.2426	10.1873	57.6464	59.8793	69.4687
389	L184 (m/z=710.426205; rt=3.71046)	8.19114	6.3164	5.84441	7.68214	5.06629	3.07559	11.3024	5.83189	6.4196	3.97536	8.49577	6.69898	14.0193	16.1849	10.5606	54.8297	58.1048	67.4008
390	L185 (m/z=686.450653; rt=3.72545)	5.76859	6.37704	5.64694	7.51265	4.10161	3.23661	9.17229	4.82017	4.10102	5.00955	6.94816	4.99004	13.1104	19.2769	6.64934	59.4265	58.4761	75.3761
391	L172 (m/z=846.481626; rt=3.68801)	10.905	10.7216	6.31459	14.0218	7.88862	6.62062	10.6622	8.06956	9.25191	7.10416	11.934	7.22016	9.01573	15.3666	11.6473	48.2911	46.0196	58.9454
392	L175 (m/z=810.504213; rt=3.69195)	6.83789	5.48756	6.01591	6.56018	5.25953	2.6217	7.77115	6.47332	5.86951	6.21077	7.46481	7.62663	11.8913	14.5232	9.76828	60.7287	60.7916	68.098
393	L173 (m/z=838.537352; rt=3.68912)	9.91156	4.25953	4.28073	12.1285	4.59719	3.65595	10.5561	4.73752	4.14167	9.3508	9.21056	5.92895	11.5753	15.9602	10.9697	46.4777	61.235	71.023
394	L169 (m/z=847.517056; rt=3.67854)	1.075	0.860265	6.60798	1.39155	0.729647	1.14651	1.10174	0.761443	0.688078	14.124	19.6395	13.5045	25.326	28.3845	15.419	56.9817	49.6246	62.6339
395	L170 (m/z=846.529389; rt=3.68132)	15.6811	11.502	11.5807	20.1629	18.2869	16.1545	16.5617	18.0092	9.44783	10.1676	9.94954	7.8064	11.5194	12.0002	9.43089	25.9072	30.2521	45.5797
396	L174 (m/z=492.3258; rt=3.69114)	19.1497	13.4484	25.4292	18.4526	16.4432	18.3306	19.3416	19.9626	17.9946	11.8601	14.2081	13.5779	16.1257	23.5054	13.2522	15.0703	12.4323	11.4155
397	L176 (m/z=664.458165; rt=3.69313)	21.7792	17.8458	27.0221	23.4028	15.3681	13.557	17.6935	15.4477	17.4785	9.84628	16.4821	13.6403	11.7938	18.2558	10.4584	15.4844	16.6004	17.8437
398	L180 (m/z=711.462214; rt=3.69729)	34.0645	20.6711	24.8795	17.252	11.4237	10.192	14.1477	7.914	7.23369	4.58082	7.31784	5.61452	5.55756	8.4991	5.51816	24.3974	44.1743	46.5621
399	L187 (m/z=712.466158; rt=3.74248)	27.8965	25.0961	22.3311	25.3429	13.4237	12.4048	12.6379	9.6802	9.99234	7.78107	10.395	8.36444	9.32449	10.1627	9.3496	17.0171	31.2424	37.5577
400	L188 (m/z=694.46873; rt=3.7429)	21.9909	19.5348	28.281	23.2363	14.404	12.1286	16.8481	15.6797	14.5923	5.63274	14.1404	12.9305	10.9883	16.2244	9.57303	21.3035	20.0168	22.4946
401	L186 (m/z=695.471953; rt=3.74089)	21.7173	21.3759	30.7756	24.0512	15.2922	12.2831	17.2844	13.2445	15.1187	8.77133	14.2428	11.8686	12.1368	18.393	9.85034	16.039	17.4516	20.1037
402	L190 (m/z=820.537386; rt=3.75144)	18.7636	26.1274	38.7864	18.1817	17.0171	14.8898	22.654	14.163	18.0168	15.6851	16.6045	12.2484	13.5038	17.834	6.94187	11.2118	8.25398	9.11665
403	L191 (m/z=820.538275; rt=3.75155)	18.7636	26.1274	38.7864	18.1817	17.0171	14.8898	22.654	14.163	18.0168	15.6851	16.6045	12.2484	13.5038	17.834	6.94187	11.2118	8.25398	9.11665
404	L192 (m/z=802.507671; rt=3.75994)	28.6732	26.6149	36.3337	28.3249	16.0403	13.7196	16.6393	15.4639	15.9937	5.75587	13.873	11.4426	5.7062	10.0911	7.00439	14.9006	17.9169	15.506
405	L193 (m/z=700.458486; rt=3.76187)	14.0873	14.1404	21.3624	17.2827	14.2023	11.7497	18.4944	13	15.1516	9.2851	16.2813	12.3598	13.4048	22.1835	10.6402	27.4457	20.1923	28.7363
406	L196 (m/z=804.54208; rt=3.77678)	22.1401	18.3651	30.2324	22.8092	14.9867	13.6307	19.3623	13.6239	15.5382	6.40759	15.0573	12.4966	10.5204	20.5993	10.9435	18.7604	17.3676	17.1586
407	L197 (m/z=804.546837; rt=3.7768)	22.1401	18.3651	30.2324	22.8092	14.9867	13.6307	19.3623	13.6239	15.5382	6.40759	15.0573	12.4966	10.5204	20.5993	10.9435	18.7604	17.3676	17.1586
408	L194 (m/z=805.545044; rt=3.77635)	21.5894	21.7212	26.8179	22.9432	17.6891	12.3902	19.785	13.3959	16.6266	6.73311	15.4468	15.7913	11.5301	14.9787	10.5781	17.4192	16.7683	17.7959
409	L195 (m/z=805.550828; rt=3.77637)	21.5894	21.7212	26.8179	22.9432	17.6891	12.3902	19.785	13.3959	16.6266	6.73311	15.4468	15.7913	11.5301	14.9787	10.5781	17.4192	16.7683	17.7959
410	L207 (m/z=664.457631; rt=3.79771)	18.3293	19.1901	23.2166	19.6861	15.2903	12.1565	19.1503	15.421	16.3338	10.5677	15.8724	14.9567	12.6564	17.0708	12.4626	19.6101	17.1554	20.8738
411	L217 (m/z=729.424931; rt=3.8397)	5.48128	7.46532	9.29678	6.47665	7.39753	5.43782	10.2821	9.18568	11.4757	10.6657	13.7711	13.5416	17.9846	20.5851	17.2565	49.1097	41.5952	42.9916
412	L218 (m/z=729.414044; rt=3.83972)	5.48128	7.46532	9.29678	6.47665	7.39753	5.43782	10.2821	9.18568	11.4757	10.6657	13.7711	13.5416	17.9846	20.5851	17.2565	49.1097	41.5952	42.9916
413	L216 (m/z=724.467184; rt=3.83772)	2.88052	3.90495	4.23883	3.39887	3.36879	2.0244	5.23812	4.08377	5.20818	3.01197	8.31321	6.03486	10.4158	15.2005	8.69927	75.0547	65.1288	73.7945
414	L214 (m/z=724.43977; rt=3.83764)	3.57054	4.02536	4.11503	3.44068	3.52808	2.07165	5.39883	4.14285	5.28323	3.50209	8.51632	6.03985	10.6992	15.2662	8.68238	73.3887	64.5212	73.8079
415	L215 (m/z=725.470861; rt=3.83766)	3.12751	4.02248	4.28339	4.23436	3.47869	2.42926	5.71986	3.92222	5.10333	3.70842	8.25154	6.18138	10.7765	14.5897	8.5609	72.4333	65.7353	73.4417
416	L213 (m/z=725.445964; rt=3.83758)	3.28874	5.1701	4.473	4.4119	4.31648	3.08049	7.0084	4.22701	5.06575	3.77973	8.47577	6.55665	11.1852	14.6974	8.6371	70.326	63.1133	72.187
417	L222 (m/z=792.494005; rt=3.84578)	3.51088	4.04103	5.45726	3.93569	4.30992	2.99129	4.67058	4.58676	5.72546	4.40404	8.58678	7.10961	9.45744	15.3983	10.3151	74.0214	63.0772	68.4012
418	L199 (m/z=796.525249; rt=3.78876)	5.48292	4.33255	5.01758	4.72583	2.879	2.33184	6.96248	5.11216	4.55838	4.71646	9.0036	6.61639	13.0661	14.9515	9.13542	65.0462	63.7212	72.3404
419	L198 (m/z=796.486399; rt=3.78858)	9.35562	4.92621	5.38263	7.76326	3.95772	4.40753	8.84404	4.67966	4.94136	11.3057	8.47163	6.25446	10.6114	15.1405	9.42485	52.12	62.8243	69.5892
420	L219 (m/z=730.423129; rt=3.84015)	5.59723	8.43978	9.0063	7.52227	6.92924	6.51825	9.70806	10.9742	12.0695	9.33039	11.9039	12.8797	18.0914	22.9816	16.8765	49.7507	38.7713	42.6497
421	L212 (m/z=730.445864; rt=3.83337)	8.93673	8.57255	14.0881	9.34883	4.06808	6.06941	8.8326	9.98393	8.64496	7.07235	11.5429	10.7941	15.3789	24.3102	16.3514	50.4305	41.5223	44.0521
422	L220 (m/z=900.541573; rt=3.84179)	6.07817	6.52861	8.21758	6.79296	6.19424	2.85546	10.2737	6.40119	6.57131	4.73704	9.99637	9.10138	13.5906	19.3718	11.5064	58.5274	51.5078	61.7479
423	L221 (m/z=900.515985; rt=3.84208)	5.53155	6.06483	8.19817	6.54606	6.02788	2.6726	10.7292	6.45187	6.61434	4.74363	9.99264	9.2117	14.2203	21.1	11.896	58.2294	50.3628	61.4071
424	L200 (m/z=801.480947; rt=3.79127)	8.23032	7.79253	8.44177	11.4932	7.8358	5.93396	9.07858	8.98909	10.441	9.75367	15.1082	14.4776	12.4219	20.465	16.2187	49.0223	39.8094	44.487
425	L201 (m/z=801.485579; rt=3.79138)	8.23032	7.79253	8.44177	11.4932	7.8358	5.93396	9.07858	8.98909	10.441	9.75367	15.1082	14.4776	12.4219	20.465	16.2187	49.0223	39.8094	44.487
426	L202 (m/z=980.622645; rt=3.79202)	10.5404	10.7818	12.2086	8.3349	8.59249	6.36491	11.691	9.57792	14.2514	8.78959	11.2652	8.13449	14.4759	18.265	11.2317	46.1682	41.5175	47.8089
427	L210 (m/z=704.452789; rt=3.81579)	23.3014	23.7244	35.235	26.4012	18.7236	14.014	20.6474	16.58	16.9464	6.40097	15.3067	14.3429	10.0661	15.7158	9.14408	13.1829	9.94952	10.3177
428	L206 (m/z=692.456226; rt=3.79458)	21.8213	25.8404	38.0091	29.4601	19.4954	16.7431	18.9366	16.6712	17.2958	10.5368	18.2532	14.0744	9.94508	12.9439	6.00633	9.30007	6.79599	7.87126
429	L205 (m/z=692.439492; rt=3.7942)	21.7652	26.0241	37.8162	29.5671	19.654	16.8966	19.0541	16.5808	17.3574	10.5067	18.0941	14.1562	9.87092	12.9381	6.02732	9.23601	6.70889	7.74635
430	L209 (m/z=705.456299; rt=3.81524)	23.4857	24.4119	33.9367	26.1534	17.7761	15.1502	18.6574	15.1317	18.4123	6.36677	16.4813	14.3537	10.8655	16.8287	9.175	14.4712	9.37041	8.9722
431	L211 (m/z=704.425208; rt=3.81637)	22.4608	23.5255	32.636	25.3749	17.8844	14.6774	19.7918	15.4323	17.7352	9.65101	15.3702	14.6219	8.69902	16.3455	9.56024	14.0225	11.4422	10.7692
432	L204 (m/z=693.458873; rt=3.79368)	21.9358	27.1568	38.9511	28.5865	18.4468	15.1104	20.5488	16.356	17.6638	10.0211	18.3541	13.5593	9.63886	13.229	7.52702	9.26892	6.45726	7.18837
433	L203 (m/z=693.441276; rt=3.79343)	22.3483	25.7316	39.079	28.4336	17.637	15.1379	20.3019	15.3679	17.961	10.2786	17.6361	13.329	10.415	17.7779	7.67094	8.22245	5.84949	6.82216
434	L208 (m/z=830.559859; rt=3.8027)	16.6797	13.2392	24.611	16.0182	15.3415	11.636	19.1621	15.8061	14.5958	10.7992	18.3708	12.8489	11.3753	16.8361	14.3049	25.9655	20.4063	22.0033
435	L224 (m/z=636.428571; rt=3.86146)	19.7368	21.8832	28.1934	20.8163	12.2555	10.065	19.5298	12.2302	11.8319	7.37574	15.3208	13.0354	15.4366	17.9131	8.78439	17.1048	20.3971	28.0899
436	L225 (m/z=636.413409; rt=3.86152)	19.4848	21.8243	28.2782	19.9963	12.4503	9.95848	19.2574	12.2871	11.9809	7.00212	15.7094	13.289	15.0374	17.9348	9.18598	19.222	19.794	27.3074
437	L223 (m/z=637.430267; rt=3.86054)	17.5698	20.188	24.6353	20.6705	14.1792	11.3969	19.4647	12.1563	15.5356	9.78732	14.5184	12.1609	16.2416	18.9412	9.86913	16.2661	20.017	26.4021
438	L226 (m/z=812.561642; rt=3.86204)	18.236	22.134	27.1666	14.2832	16.5118	13.8395	13.2193	18.0311	16.1731	8.32541	15.0703	12.096	14.8385	15.1969	9.18601	31.0977	13.0558	21.5388
439	L227 (m/z=702.472228; rt=3.86449)	16.9347	19.4155	26.006	18.1319	15.0775	12.2304	15.368	11.282	16.0009	8.89706	15.8339	14.7364	12.449	17.946	10.9827	28.2194	20.4451	20.0435
440	L228 (m/z=702.473626; rt=3.86527)	16.9347	19.4155	26.006	18.1319	15.0775	12.2304	15.368	11.282	16.0009	8.89706	15.8339	14.7364	12.449	17.946	10.9827	28.2194	20.4451	20.0435
441	L229 (m/z=803.52065; rt=3.87461)	28.3324	19.7605	31.5825	23.8633	19.4225	14.1394	16.8533	13.5287	14.2186	8.08461	12.8279	12.7981	7.59131	16.3572	10.7941	15.275	18.1033	16.4673
442	L230 (m/z=803.532361; rt=3.87479)	27.3754	19.7605	31.5825	23.0573	19.4225	14.1394	16.2841	13.5287	14.2186	8.61125	12.8279	12.7981	9.3298	16.3572	10.7941	15.3422	18.1033	16.4673
443	L232 (m/z=810.508967; rt=3.90109)	6.35874	8.0014	7.89207	7.34216	6.17111	3.26576	5.53809	6.44482	6.48363	4.42458	7.4321	3.77435	6.55667	7.81451	3.26311	69.7798	64.1361	75.3211
444	L231 (m/z=811.512457; rt=3.8994)	11.6354	9.14721	9.98811	9.44425	6.28687	3.94636	8.08798	7.31798	6.72675	4.28617	10.2205	7.15772	8.92692	7.00347	3.71921	57.6192	60.0239	68.4619
445	L235 (m/z=680.452785; rt=3.90662)	26.2621	26.4479	37.8842	30.1853	18.9546	16.5737	20.9781	15.7199	17.9886	6.06004	14.9011	13.4084	9.45043	16.0006	7.89249	7.06398	7.97578	6.25268
446	L233 (m/z=680.434786; rt=3.90204)	26.1645	26.6461	40.1813	31.2462	19.0288	16.0882	20.4913	16.2081	17.4004	5.81283	14.9089	12.8366	9.64617	15.4949	7.54022	6.63909	7.7132	5.95323
447	L246 (m/z=729.414068; rt=3.94035)	5.07154	7.02161	7.21047	6.84929	6.19361	5.09716	8.98194	7.88431	11.5972	11.3344	14.236	14.39	17.0566	20.8642	18.3724	50.7063	43.8003	43.3328
448	L247 (m/z=729.424936; rt=3.94037)	5.07154	7.02161	7.21047	6.84929	6.19361	5.09716	8.98194	7.88431	11.5972	11.3344	14.236	14.39	17.0566	20.8642	18.3724	50.7063	43.8003	43.3328
449	L244 (m/z=724.467471; rt=3.93953)	2.61066	3.05909	2.86174	2.76036	2.90138	1.59044	5.46088	3.75529	4.4068	2.94377	7.65909	5.67968	9.72445	14.9618	7.97185	76.4999	67.6633	77.4895
450	L245 (m/z=730.431491; rt=3.93983)	11.3497	9.81922	13.0895	11.494	8.49341	8.78295	11.5465	11.2969	12.4039	5.36569	13.4423	10.8666	18.5613	18.1755	16.3365	41.6827	38.7726	38.5205
451	L248 (m/z=730.460669; rt=3.94182)	13.3035	13.7786	17.2158	13.8232	8.55097	10.1334	13.5282	11.3654	11.7108	5.45252	14.2756	10.3948	16.1931	17.7879	15.118	37.6994	34.2416	35.4271
452	L243 (m/z=724.439725; rt=3.93951)	3.25684	2.96522	2.90738	3.89431	2.92525	1.65542	5.29628	3.98062	4.45454	3.65154	7.76804	5.67654	9.60865	15.0212	8.03562	74.2924	67.3397	77.2705
453	L242 (m/z=725.470915; rt=3.93938)	3.97554	3.25098	3.02917	4.09127	3.16312	2.32856	5.6414	3.58683	4.16746	3.95337	7.19674	4.75913	9.61157	15.1141	8.561	72.7269	67.6883	77.1547
454	L238 (m/z=824.558649; rt=3.92389)	4.95571	5.80149	6.0239	6.31764	4.50869	2.36346	5.45117	5.55993	5.03359	5.57157	8.31304	5.65715	9.76626	14.5723	9.14915	67.9377	61.2445	71.7727
455	L241 (m/z=725.445937; rt=3.9393)	4.14488	4.23701	2.92139	4.0872	4.18011	2.61623	7.56467	4.70941	4.16452	3.97225	7.214	4.97815	9.9926	14.4405	8.92846	70.2384	65.219	76.3913
456	L234 (m/z=824.535125; rt=3.90399)	4.27174	3.48624	5.12456	6.92662	5.30115	4.38434	5.80793	4.65193	5.09338	4.1773	8.71877	5.48538	10.1214	14.289	7.71756	68.695	63.5529	72.1948
457	L240 (m/z=986.612184; rt=3.93574)	7.2786	7.27193	6.78243	7.38186	7.37115	4.7897	9.56576	7.86716	7.42977	7.73798	11.1352	10.295	11.1921	15.9228	12.2974	56.8437	50.4318	58.4057
458	L239 (m/z=986.586679; rt=3.93529)	7.20389	7.64057	7.03852	6.72277	7.33358	4.97055	10.0197	7.77577	7.64542	7.65438	11.0352	10.6837	11.7232	16.3327	12.1707	56.676	49.8822	57.491
459	L236 (m/z=818.512864; rt=3.91806)	17.2882	16.648	22.4009	20.8597	15.2757	12.4142	16.4151	14.0747	18.5131	14.747	17.1373	16.2987	12.1616	18.4761	7.97241	18.5284	18.3883	22.4007
460	L237 (m/z=818.530929; rt=3.91819)	17.3009	16.648	22.4009	20.875	15.2757	12.4142	16.4271	14.0747	18.5131	14.0235	17.1373	16.2987	12.8314	18.4761	7.97241	18.542	18.3883	22.4007
461	L251 (m/z=326.378879; rt=3.94271)	16.3045	17.6446	19.3139	12.004	8.87401	7.56572	9.88611	7.29373	12.1569	3.09333	11.4175	12.0196	27.6979	12.5049	13.5299	31.0142	42.2652	35.414
462	L252 (m/z=326.373085; rt=3.94277)	16.594	18.4901	19.9179	12.2119	9.08026	7.67881	9.79874	7.45082	12.0274	3.04311	11.7465	12.3927	28.5673	12.5	13.9624	29.7849	40.7322	34.0208
463	L250 (m/z=327.382842; rt=3.94246)	13.4958	16.5277	16.7261	10.0997	8.82314	14.062	8.13954	7.17315	10.4162	16.2188	18.6787	11.5147	23.4414	10.0947	11.7562	28.6047	38.7026	35.5248
464	L249 (m/z=327.379619; rt=3.94241)	13.5659	16.7349	16.9739	10.1105	9.05281	14.4707	8.19426	7.30766	10.4655	16.5866	18.9562	11.8955	23.5285	10.1651	12.1054	28.0141	37.7834	34.0891
465	L253 (m/z=810.553849; rt=3.95474)	12.2891	8.86002	20.7853	12.8186	10.0207	7.01325	10.3736	11.8149	10.7923	12.5617	16.214	10.2557	11.575	12.9953	12.7434	40.382	40.095	38.4101
466	L258 (m/z=914.555068; rt=3.9859)	4.21941	5.11947	5.12374	4.63399	4.46768	2.80859	7.64433	5.54531	6.18167	4.49007	9.01953	7.65813	13.4591	16.6606	10.1596	65.5531	59.1874	68.0682
467	L259 (m/z=914.537156; rt=3.98597)	4.21941	5.11947	5.12374	4.63399	4.46768	2.80859	7.64433	5.54531	6.18167	4.49007	9.01953	7.65813	13.4591	16.6606	10.1596	65.5531	59.1874	68.0682
468	L264 (m/z=978.6078; rt=4.00658)	10.0572	6.85649	7.3339	10.887	5.27035	6.49383	11.6136	7.79805	9.0724	8.79668	11.6233	10.0654	12.8969	17.6792	15.8001	45.7485	50.7726	51.2344
469	L265 (m/z=978.584936; rt=4.00674)	10.2624	6.8386	7.36035	10.7324	5.00184	6.51725	11.1641	7.82346	9.10512	7.99947	11.6612	10.0683	13.16	17.7368	15.8571	46.6816	50.9381	51.0918
470	L254 (m/z=822.542924; rt=3.96203)	5.43223	5.00557	3.79606	5.23333	4.78479	2.1694	5.41447	4.51372	4.61322	6.30152	7.47007	6.38707	11.3518	14.2085	8.08313	66.2667	64.0173	74.9511
471	L262 (m/z=915.561383; rt=3.9881)	4.43837	4.4116	4.79361	5.3706	4.07296	2.72953	7.45786	5.31135	5.52063	6.47648	9.35561	9.07199	13.2648	19.5702	10.8725	62.9919	57.2783	67.0117
472	L263 (m/z=915.534942; rt=3.98812)	4.06726	4.60807	4.79323	5.32806	4.18855	2.93293	7.89537	5.45093	5.74856	6.64792	9.79868	9.34994	13.4761	19.7534	11.0712	62.5853	56.2004	66.1041
473	L255 (m/z=832.505593; rt=3.97429)	9.85898	8.07853	8.43141	10.5798	6.78631	6.10671	13.3859	8.70513	6.60795	9.10127	10.1946	7.1923	12.4287	14.5118	11.6454	44.6455	51.7235	60.0162
474	L257 (m/z=692.452485; rt=3.97751)	33.3766	32.5788	51.8346	24.0737	21.184	16.3813	19.1783	15.8069	14.6561	9.31973	14.3505	8.73823	8.02746	11.4585	5.5911	6.02415	4.6213	2.79865
475	L256 (m/z=692.439643; rt=3.9774)	28.5592	31.3665	50.8317	36.0279	21.1277	16.1904	16.6189	15.994	14.2772	7.4924	13.6547	8.93569	7.52721	14.7127	7.76095	3.77439	3.14446	2.00398
476	L261 (m/z=738.4612; rt=3.98668)	9.55657	14.3565	15.7771	9.51826	10.2557	9.0017	14.4523	11.2794	12.8725	13.5946	14.5833	12.8282	15.2861	16.9428	10.6867	37.5922	32.5823	38.8339
477	L260 (m/z=738.474566; rt=3.98614)	10.8818	14.3442	15.7775	10.6914	10.0407	8.89989	15.6689	11.2903	12.6087	5.41611	14.3363	11.9848	16.6281	16.6949	10.6184	40.7137	33.2936	40.1107
478	L266 (m/z=833.576018; rt=4.00771)	17.1003	15.0745	13.6908	19.7761	13.899	12.4677	15.3779	14.2877	14.1811	11.5484	17.8876	13.0207	14.1206	17.4364	10.3952	22.0768	21.4148	36.2443
479	L267 (m/z=832.575809; rt=4.00906)	13.0556	15.8162	22.2188	14.6842	14.2676	9.99459	16.7412	12.0382	12.3535	10.6066	14.7561	13.4794	13.9311	18.495	9.74994	30.9812	24.6269	32.2038
480	L269 (m/z=802.527957; rt=4.01565)	22.046	15.9041	19.9841	17.1002	11.3223	11.6781	16.9314	13.9794	16.0412	7.20243	17.7204	15.3944	15.0324	19.2542	11.7625	21.6876	21.8195	25.1396
481	L270 (m/z=802.490539; rt=4.02609)	21.2097	16.8062	20.6862	16.6967	11.8049	12.2146	14.9362	13.8643	15.9975	8.55107	17.8861	14.1523	10.5972	16.8862	10.4059	28.0091	22.7524	26.5436
482	L268 (m/z=803.531785; rt=4.01483)	15.7732	16.2927	21.0199	19.0633	12.4227	12.1354	18.0507	14.1494	17.4079	10.2721	20.8313	14.4582	13.7253	17.6313	12.3636	23.1153	18.6726	22.6151
483	L271 (m/z=804.553755; rt=4.03316)	22.886	21.2488	18.6064	7.39867	13.7693	9.6276	11.6264	16.4446	13.7106	7.28727	14.033	10.8078	6.26197	13.4596	7.99022	44.5397	21.0448	39.2573
484	L272 (m/z=826.524257; rt=4.05438)	7.53987	8.05954	9.24572	6.18069	7.64125	4.87533	9.2109	7.24954	6.79571	7.37445	9.65942	8.1589	12.1133	15.7528	8.10822	57.5808	51.6374	62.8161
485	L274 (m/z=826.510338; rt=4.05705)	7.53987	8.05954	9.24572	6.18069	7.64125	4.87533	9.2109	7.24954	6.79571	7.37445	9.65942	8.1589	12.1133	15.7528	8.10822	57.5808	51.6374	62.8161
486	L276 (m/z=827.528072; rt=4.06331)	10.872	8.68258	10.6354	8.88611	6.79159	5.34152	15.2431	7.64642	8.23662	7.3307	10.4898	8.90294	14.9371	17.5508	9.75106	42.7311	48.8387	57.1325
487	L275 (m/z=796.525848; rt=4.06058)	7.54631	4.51751	4.65027	6.34328	3.92984	2.37308	8.27368	4.38151	3.53691	4.45017	7.77901	6.13511	8.84009	10.856	6.02338	64.5465	68.5362	77.2812
488	L273 (m/z=801.480595; rt=4.05539)	6.47729	7.30958	4.44842	8.27185	4.40886	5.67722	4.8407	6.82955	7.50324	10.2099	11.5864	12.6261	12.0984	22.1973	18.9258	58.1019	47.6683	50.8193
489	L281 (m/z=650.443074; rt=4.09566)	20.0771	19.6152	23.915	22.6646	13.8931	10.3838	19.0766	13.163	13.327	6.13919	15.3438	11.8543	10.9128	16.3499	9.53382	21.1297	21.6351	30.9861
490	L280 (m/z=650.422665; rt=4.09564)	20.2677	19.787	24.4303	22.7167	14.0506	10.5167	19.1431	13.2674	13.4749	6.33476	15.3557	11.9975	10.8394	16.4632	9.63725	20.6985	21.076	29.9433
491	L285 (m/z=651.447207; rt=4.09576)	20.674	19.8029	23.7719	22.716	13.7316	10.9593	18.738	12.6615	13.0449	6.87918	15.8865	11.6903	10.718	15.7931	10.2188	20.2747	22.1244	30.3148
492	L284 (m/z=651.42864; rt=4.09574)	20.157	19.7061	24.1734	22.4445	13.7669	11.097	18.5291	12.782	13.1097	6.84039	15.9496	11.7099	12.1806	15.9961	10.2635	19.8484	21.7993	29.6466
493	L282 (m/z=325.219619; rt=4.09568)	19.5198	19.5255	23.9942	24.2824	14.544	11.8352	19.2404	14.3366	13.3606	6.01988	15.4356	12.2243	10.877	16.0529	9.73391	20.0606	20.1054	28.8518
494	L283 (m/z=325.223766; rt=4.09569)	19.5198	19.5273	23.9995	24.2824	14.5453	11.8378	19.2404	14.3379	13.3636	6.01988	15.437	12.227	10.877	16.0453	9.71408	20.0606	20.1073	28.8581
495	L277 (m/z=662.44363; rt=4.07434)	16.8206	19.6567	31.1984	24.0479	12.8914	12.9259	16.7824	13.2484	15.0648	9.57454	17.2016	12.6014	12.2282	18.5104	11.0691	20.5463	18.4915	17.1405
496	L278 (m/z=662.427147; rt=4.07558)	15.6748	19.5942	30.3781	23.3555	12.8559	12.7543	15.8689	13.1704	15.4025	9.34642	18.1652	13.498	11.5956	18.1898	11.3799	24.1588	18.0245	16.5873
497	L286 (m/z=652.448069; rt=4.0958)	20.1844	21.2078	21.87	23.0969	15.5158	12.0593	19.0006	12.8937	15.2178	8.59599	14.9255	13.3131	10.0546	14.6682	9.73931	19.0675	20.7889	27.8003
498	L287 (m/z=325.723394; rt=4.09595)	18.5308	17.7001	22.0263	22.687	12.5107	11.0172	15.3604	11.0511	13.4054	10.3592	15.4257	12.7284	16.8836	24.7521	10.7456	16.179	18.5604	30.077
499	L288 (m/z=216.816679; rt=4.09616)	17.6423	20.2529	24.9815	20.6021	13.234	9.93882	17.1099	11.5382	12.956	8.54876	15.0937	11.8798	16.4225	17.6882	9.15925	19.6744	22.193	31.0847
500	L289 (m/z=216.814993; rt=4.09623)	18.5831	20.5309	25.4381	20.896	13.1538	10.3389	16.6975	11.9876	13.0543	8.78186	15.4714	12.1862	16.4278	17.8339	9.37632	18.6138	21.0223	29.6062
501	L279 (m/z=680.460199; rt=4.09507)	13.4469	13.8451	17.2193	11.902	10.6022	7.89879	8.3582	8.79577	9.68405	6.71661	12.3163	10.5363	12.9408	13.1354	10.8463	46.6355	41.3052	43.8153
502	L290 (m/z=841.555272; rt=4.09698)	16.2261	9.37371	7.2254	10.0635	5.32667	2.60437	9.4326	7.99062	3.46835	8.17608	8.25972	5.31217	16.2969	10.5608	6.39725	39.8048	58.4885	74.9925
503	L291 (m/z=804.608076; rt=4.10363)	24.0927	14.3626	10.4517	7.17867	8.78777	4.76183	8.54228	8.20476	9.34406	3.81739	11.268	4.59322	6.07577	9.19993	6.64181	50.2932	48.177	64.2073
504	L292 (m/z=828.543977; rt=4.10684)	20.1004	14.5371	15.0901	21.2117	10.5309	11.4825	12.9255	13.7145	14.187	10.5741	15.9352	11.2473	13.2762	16.2824	9.51814	21.9121	28.9998	38.475
505	L293 (m/z=852.536994; rt=4.10693)	14.4394	15.6266	13.2606	16.1502	14.104	13.0608	15.0317	13.4751	18.5291	13.2839	15.4411	14.7211	11.878	14.5511	16.5869	29.2168	26.8021	23.8415
506	L294 (m/z=829.549097; rt=4.11294)	16.8416	14.5738	16.5984	15.1137	8.76694	12.5814	22.8264	17.3757	22.9433	12.9723	18.7549	11.4106	15.3718	16.3428	10.0592	16.8743	24.1859	26.4071
507	L295 (m/z=806.509292; rt=4.14863)	20.2978	19.4164	18.4381	23.1896	15.7268	12.7438	19.0843	17.1196	20.8304	11.4325	14.8179	13.8109	12.4841	19.8989	12.4725	13.5118	13.0203	21.7043
508	L298 (m/z=807.546211; rt=4.15189)	17.1583	15.4136	18.8047	18.7829	14.9521	14.5076	17.7047	15.443	15.1045	11.4554	19.8709	13.4991	14.1927	16.8698	16.0563	20.7059	17.4505	22.0279
509	L296 (m/z=807.56166; rt=4.15112)	16.9358	15.2649	18.6599	18.8195	14.8078	14.3278	17.6562	15.294	14.7731	11.2721	20.644	13.3079	14.1153	16.7071	15.704	21.2011	17.2821	23.2273
510	L297 (m/z=806.5586; rt=4.15123)	21.8306	16.0888	24.3121	21.3654	15.7437	12.0557	18.5779	14.9583	14.9923	7.54934	15.4529	12.4445	11.7674	19.6799	11.5065	18.9094	18.0765	24.6889
511	L299 (m/z=806.537573; rt=4.15237)	21.9134	15.8033	24.2446	21.5565	15.6842	12.0901	18.9457	15.4398	15.5182	7.62077	16.0296	12.8752	11.6661	19.7576	11.6448	18.2975	17.2856	23.627
512	L323 (m/z=678.454147; rt=4.24489)	25.513	23.8207	33.3057	23.0575	17.0695	12.0351	18.0183	14.3479	16.7081	6.99272	16.0847	14.1124	10.4927	15.206	9.28317	15.9257	13.4713	14.5556
513	L300 (m/z=664.458052; rt=4.1542)	23.9107	24.9979	32.1712	26.6395	19.8825	14.7853	18.8349	13.6474	17.2989	6.03973	15.2049	12.9116	9.18348	14.0592	10.031	15.3917	12.2079	12.802
514	L322 (m/z=679.459932; rt=4.24368)	22.5042	24.7911	30.4862	22.4321	15.8697	13.0557	18.0915	14.06	16.9521	10.0818	16.0691	13.6711	11.3297	16.9746	8.78373	15.5608	12.2356	17.0512
515	L309 (m/z=750.496153; rt=4.18119)	20.306	21.8282	24.4818	19.5359	18.8617	14.84	23.9491	17.0592	18.9461	10.227	15.0399	16.0855	9.61459	15.2728	10.5316	16.3674	11.9383	15.115
516	L304 (m/z=676.459596; rt=4.15476)	20.3353	20.7202	28.9784	25.6336	17.0419	16.5192	20.2742	15.759	18.2083	8.1778	16.4846	14.8008	10.7965	18.443	9.4065	14.7826	11.5513	12.0869
517	L303 (m/z=676.440656; rt=4.15474)	20.2841	20.9105	28.9747	25.6273	17.1178	16.604	20.4807	15.8631	18.2998	8.27527	16.4303	15.018	10.9639	18.4814	9.42449	14.3688	11.197	11.6789
518	L305 (m/z=677.449712; rt=4.15479)	20.4888	21.3391	28.2401	24.4265	18.1581	16.0922	21.5201	16.3157	18.2883	8.46948	15.5802	14.9989	10.7805	17.2955	9.52506	14.3147	11.3115	12.8554
519	L306 (m/z=677.465102; rt=4.15481)	20.6165	21.1079	28.3518	24.372	18.178	15.9915	21.3348	16.0402	18.0659	8.54619	15.6582	15.0041	10.559	17.5409	9.45944	14.5715	11.4748	13.1274
520	L315 (m/z=692.453165; rt=4.21553)	24.4583	21.8722	36.3774	25.2387	20.4762	16.6888	19.9745	17.7064	18.7158	9.9678	15.4836	13.524	10.7432	16.9569	7.73086	9.61745	7.50463	6.96319
521	L314 (m/z=692.440741; rt=4.21528)	23.8474	21.8565	35.504	25.6419	19.8688	16.5533	19.6737	17.6522	18.7529	10.1028	16.3916	14.2969	11.1442	17.193	7.69846	9.59005	7.03806	7.1944
522	L301 (m/z=338.229676; rt=4.15457)	19.1841	18.611	28.0887	24.656	18.2862	17.704	19.9419	17.383	18.0366	11.1821	17.3701	14.2178	10.7507	18.3873	11.1124	14.2851	9.96229	10.8405
523	L307 (m/z=867.539361; rt=4.15645)	24.9552	27.151	34.2047	21.5462	18.4039	11.9154	16.2709	13.7131	15.3464	9.95957	16.7742	14.6558	11.8026	13.8356	10.2921	15.4655	10.1221	13.5857
524	L302 (m/z=868.542251; rt=4.15472)	23.4615	21.1494	26.996	23.9982	19.7241	12.3705	14.2819	15.742	14.4504	10.2711	18.4099	14.7012	13.1385	15.2562	11.8248	14.8488	9.71843	19.657
525	L308 (m/z=830.557181; rt=4.17212)	15.076	16.9563	21.7978	15.1635	16.1001	9.38168	22.6788	12.5176	17.5555	12.1523	15.8217	13.9461	14.548	19.6309	11.1197	20.3814	18.9735	26.1992
526	L311 (m/z=810.535032; rt=4.18448)	17.6921	17.0816	23.6696	16.9589	16.2674	12.4658	19.583	13.4842	16.4268	8.34549	13.3397	11.6743	10.2969	19.7403	10.8029	27.1237	20.0868	24.9607
527	L310 (m/z=810.554037; rt=4.18369)	18.2285	18.2212	23.4122	18.1705	17.3003	12.0949	18.9977	14.7673	15.6634	7.40383	13.7256	10.9015	7.89902	14.6744	10.9618	29.3005	21.3112	26.9662
528	L313 (m/z=812.55147; rt=4.20337)	12.2713	22.73	22.5495	13.2652	12.1518	12.0823	20.5522	10.8858	17.7875	10.2272	16.3389	12.9051	19.8099	17.0936	9.52401	23.8743	20.7999	25.1516
529	L312 (m/z=812.524075; rt=4.19958)	13.3145	25.0661	21.1265	13.8456	13.496	10.6899	20.9275	12.5843	16.1666	10.2438	18.1175	11.3777	22.1491	18.2362	13.84	19.5194	12.4999	26.7994
530	L316 (m/z=740.499515; rt=4.21747)	2.74845	3.30068	3.02197	3.14148	2.6369	1.32183	4.6361	3.15078	3.60024	4.68806	8.03296	4.63491	10.6845	15.277	7.40491	74.1014	67.6017	80.0161
531	L317 (m/z=740.476401; rt=4.21752)	2.79452	3.29165	2.7724	3.64707	2.67579	1.66331	4.44036	3.05122	3.39666	4.88487	7.94949	4.68142	10.3255	15.1391	7.57932	73.9077	67.8928	79.9069
532	L319 (m/z=814.565217; rt=4.21951)	11.1833	13.506	16.7456	9.90785	11.9178	9.82657	13.7642	10.7135	12.7122	8.54213	14.8162	12.127	13.9294	18.5798	10.628	42.6732	30.4666	37.9606
533	L318 (m/z=815.569188; rt=4.21785)	13.0501	12.9185	15.5701	12.6145	14.5929	12.625	13.4255	12.06	14.7061	11.1541	16.3123	11.2485	15.5951	15.9271	13.5465	34.1607	28.1892	32.3037
534	L321 (m/z=854.555436; rt=4.22558)	9.91273	10.6229	11.096	11.2766	9.10509	7.27289	12.2672	7.68318	11.5466	8.69874	13.1634	9.95634	12.6945	20.4126	15.0226	45.1502	39.0128	45.1057
535	L320 (m/z=854.526705; rt=4.22487)	10.2428	12.42	13.7691	12.3625	9.4322	8.76289	11.6621	8.09277	13.5556	8.84859	14.7364	11.7811	13.269	21.0574	15.7397	43.6149	34.2612	36.3915
536	L324 (m/z=702.473358; rt=4.24647)	19.9432	18.0038	26.8282	25.2996	15.2923	12.1153	18.7043	15.2746	16.1326	8.95571	16.0713	15.4829	9.59453	17.6073	9.294	17.5027	17.7507	20.1469
537	L350 (m/z=738.483079; rt=4.28206)	6.14886	5.91561	4.6704	6.99242	4.41226	2.81583	8.10222	5.13966	5.16061	5.14923	9.52033	6.75074	11.0185	16.3055	9.02089	62.5888	58.7067	71.5815
538	L339 (m/z=796.524292; rt=4.27783)	2.99176	4.04282	3.76686	3.12914	3.15789	1.63363	5.02656	3.83633	4.38164	3.69095	6.63373	5.61812	9.03175	15.0204	8.10231	76.1298	67.3089	76.4974
539	L349 (m/z=738.462209; rt=4.28181)	6.23429	5.90566	4.73322	7.12911	5.75105	2.97245	8.32848	5.41464	5.37605	5.33103	9.49046	6.88006	11.1933	15.8829	9.28235	61.7838	57.5553	70.7559
540	L340 (m/z=801.479976; rt=4.27825)	7.08463	6.36997	8.65326	6.96954	5.7478	4.97218	8.74587	6.36022	11.4287	7.89711	15.9377	15.607	16.365	19.8762	15.5625	52.9379	45.7081	43.7764
541	L337 (m/z=797.528127; rt=4.27661)	4.45444	4.17968	4.81044	4.88085	3.68574	1.78694	4.72908	4.5355	4.7379	5.96893	8.14465	5.68474	7.48948	10.8514	6.81285	72.4772	68.6031	76.1671
542	L336 (m/z=796.486032; rt=4.27491)	5.57138	4.15323	3.96624	4.08501	3.26394	1.92392	5.13829	4.45708	4.75138	6.73343	7.32351	5.83663	8.79537	15.2796	7.91115	69.6765	65.5226	75.6107
543	L352 (m/z=797.501621; rt=4.28622)	6.18665	4.81827	5.06357	5.22614	4.10462	2.61736	3.80261	4.75091	5.05361	6.25951	8.26112	6.09296	8.12855	11.6719	7.35054	70.3965	66.3932	73.822
544	L325 (m/z=798.536792; rt=4.25506)	7.45069	5.47687	6.06754	8.38581	7.91796	3.71012	4.95641	4.91036	3.91248	5.11266	7.03599	5.10076	10.835	14.6353	8.13821	63.2595	60.0235	73.0709
545	L338 (m/z=743.437743; rt=4.27779)	8.94086	10.2337	10.5036	9.00732	9.89074	7.59968	12.4499	10.9668	10.2475	10.7208	13.0737	13.9624	16.7596	18.816	16.0366	42.1215	37.0189	41.6501
546	L347 (m/z=739.48784; rt=4.28099)	5.30712	7.55295	5.79318	6.72967	5.18251	3.33453	11.5876	6.14892	5.6709	6.24308	8.2548	6.76017	12.8166	15.2693	8.27925	57.3159	57.5915	70.162
547	L346 (m/z=739.46788; rt=4.28076)	6.06757	7.57164	6.68149	6.35787	5.16648	3.5812	9.27497	6.12932	5.87342	6.54834	10.0758	6.94643	13.383	15.2866	8.95896	58.3682	55.7701	67.9585
548	L335 (m/z=743.469318; rt=4.27437)	7.02241	8.76662	11.1464	0.775651	0.749309	0.539151	12.9687	9.1313	12.6882	11.9142	17.8281	16.0722	18.4558	26.3143	19.0409	48.8632	37.2103	40.5131
549	L327 (m/z=678.475136; rt=4.25575)	24.3105	23.9323	32.0932	23.1705	16.1721	13.1047	19.1103	14.9714	16.3044	6.62099	15.7751	13.3945	10.1276	15.0826	8.86875	16.6601	14.0666	16.2344
550	L328 (m/z=678.454061; rt=4.25592)	24.6486	24.0472	32.4052	23.4236	16.7728	13.3709	19.0283	15.196	16.5729	6.75579	15.8051	13.7308	10.1372	14.9417	9.03217	16.0065	13.2371	14.888
551	L326 (m/z=679.47665; rt=4.25542)	21.9782	22.9462	30.9262	21.7161	16.4265	13.7465	18.2261	15.1271	15.6968	10.3091	16.1319	13.5916	11.5552	16.8646	9.01556	16.2153	12.5038	17.0234
552	L357 (m/z=706.469317; rt=4.29969)	22.5714	25.8441	34.0215	24.6062	20.0998	17.9518	21.0514	15.7612	16.0069	7.38952	16.942	12.8926	9.32642	10.7513	5.16552	15.0551	10.6017	13.9616
553	L359 (m/z=706.469208; rt=4.30464)	22.5714	25.8441	34.0215	24.6062	20.0998	17.9518	21.0514	15.7612	16.0069	7.38952	16.942	12.8926	9.32642	10.7513	5.16552	15.0551	10.6017	13.9616
554	L329 (m/z=339.237716; rt=4.25622)	23.3652	24.1345	32.1536	24.6756	17.5145	13.3493	19.6463	14.034	16.5393	8.37392	15.6571	13.8411	9.17688	15.2122	9.23117	14.762	13.4478	14.8856
555	L330 (m/z=814.532546; rt=4.26275)	9.43352	14.3487	20.0121	7.5531	12.4054	13.0637	10.928	9.78139	16.6724	11.4356	15.6878	10.9489	16.9215	16.6972	15.3354	43.7284	31.0795	23.9675
556	L332 (m/z=726.480252; rt=4.26985)	11.9399	11.5789	11.8989	9.77964	8.90081	4.91495	9.01185	7.9129	6.70735	6.74396	10.0023	8.34639	12.3408	11.467	9.97073	50.1838	50.1382	58.1617
557	L331 (m/z=726.465989; rt=4.26795)	13.517	13.0488	13.7075	10.9157	10.0308	5.66202	9.6819	8.90079	7.72685	7.1015	10.5212	8.25074	12.4996	11.1934	10.2562	46.2843	46.3051	54.3967
558	L333 (m/z=702.475369; rt=4.27129)	17.7008	17.3214	24.3069	22.2673	17.5307	14.103	19.1999	15.0047	16.2434	10.9714	16.9697	13.7379	11.3347	16.5196	12.2735	18.5258	16.6541	19.3354
559	L341 (m/z=702.473711; rt=4.27882)	17.6721	17.5817	24.3069	22.2311	17.7941	14.103	19.1688	15.2302	16.2434	11.1158	17.2247	13.7379	11.3163	15.2649	12.2735	18.4958	16.9044	19.3354
560	L334 (m/z=702.458232; rt=4.27243)	18.5742	19.4084	23.2626	22.8574	16.7133	13.5371	19.5645	14.3654	18.261	11.0966	16.1085	14.7794	11.2494	17.0731	12.2848	16.6579	16.3312	17.8751
561	L342 (m/z=787.536579; rt=4.27988)	15.456	13.5227	18.6121	12.6327	16.5188	12.4364	23.6369	15.45	17.4606	10.8205	17.8486	15.2459	13.6582	15.2183	9.81267	23.7958	21.4416	26.4324
562	L343 (m/z=813.553895; rt=4.2799)	16.1811	19.548	17.5301	14.7401	15.1361	12.2991	17.7383	12.2256	16.8959	9.59253	14.9618	11.921	14.1756	15.872	9.44387	27.5724	22.2564	31.91
563	L344 (m/z=786.522322; rt=4.28037)	18.9495	18.708	25.1816	14.4314	14.5323	11.5225	14.6483	14.6035	15.546	9.36517	15.7342	11.7678	14.7017	17.4624	10.8153	27.904	18.9596	25.1668
564	L345 (m/z=786.53208; rt=4.28039)	18.9495	18.708	25.1816	14.4314	14.5323	11.5225	14.6483	14.6035	15.546	9.36517	15.7342	11.7678	14.7017	17.4624	10.8153	27.904	18.9596	25.1668
565	L348 (m/z=786.500151; rt=4.2816)	17.6322	20.2454	24.5807	14.2047	16.4205	13.2046	14.5465	15.4134	15.1065	15.9178	15.4967	11.0563	11.6881	15.803	12.6445	26.0106	16.621	23.4075
566	L351 (m/z=812.5494; rt=4.28414)	14.0873	19.3885	21.57	13.1741	10.5813	11.3497	17.5877	12.205	17.4022	8.75199	15.224	12.4096	16.9525	18.1356	8.94659	29.4464	24.4656	28.3218
567	L364 (m/z=812.52447; rt=4.34347)	14.4384	15.4874	23.1364	13.1552	10.8764	10.9662	17.2702	11.9171	18.549	8.7388	16.5327	13.5178	15.2572	18.265	9.47947	31.1403	26.9214	24.3511
568	L363 (m/z=813.532577; rt=4.33874)	16.9352	19.8256	20.3652	11.3929	10.4614	10.694	16.8352	13.0774	15.2694	8.14844	14.1261	12.935	16.3981	17.6958	7.9928	30.2901	24.8137	32.7436
569	L353 (m/z=840.533008; rt=4.28673)	28.0002	21.2686	25.7344	22.4643	17.5995	14.2789	17.8054	17.8119	14.6255	7.60037	13.1184	14.3953	10.7875	9.51368	12.0471	13.3422	20.6879	18.9188
570	L358 (m/z=840.519293; rt=4.30409)	27.3636	20.5026	23.2635	21.9535	16.9656	12.5645	17.4006	17.1704	12.8695	7.42756	15.1846	12.667	10.5422	9.17101	14.4293	15.3125	21.0058	24.2063
571	L360 (m/z=840.508852; rt=4.31114)	27.3636	20.5026	23.2635	21.9535	16.9656	12.5645	17.4006	17.1704	12.8695	7.42756	15.1846	12.667	10.5422	9.17101	14.4293	15.3125	21.0058	24.2063
572	L354 (m/z=842.496005; rt=4.28842)	16.5218	15.1975	16.958	17.8778	10.949	10.7148	14.4934	5.89427	13.543	6.67638	9.40965	11.3782	10.089	11.5766	6.37696	34.3416	46.9731	41.0291
573	L355 (m/z=820.529635; rt=4.29735)	16.4773	10.186	9.13314	11.4407	4.04384	6.86575	10.592	6.99184	5.76087	6.16573	7.86565	7.1824	8.34876	11.5979	5.77728	46.9755	59.3147	65.2806
574	L356 (m/z=841.474169; rt=4.29828)	13.3155	8.58361	10.5047	8.91525	5.64692	6.96399	11.0595	5.0512	6.28366	11.4736	12.9353	14.9989	11.3896	14.5459	19.5212	43.8464	53.2371	41.7274
575	L361 (m/z=984.645941; rt=4.3133)	10.0554	8.2521	7.55088	10.7607	9.0241	6.44968	13.1481	10.7514	7.79182	7.86415	11.2374	11.3501	15.6071	16.0864	12.3871	42.5645	44.6486	54.4704
576	L365 (m/z=984.598244; rt=4.34507)	10.87	6.14493	6.84585	11.0575	7.00363	5.49639	14.3979	9.79498	6.33942	8.10556	11.8713	11.8016	17.6028	15.3777	12.8798	37.9663	49.8074	56.637
577	L362 (m/z=688.457667; rt=4.31426)	16.5392	19.9981	31.2034	22.9691	20.0729	16.1785	19.2959	17.1261	16.8325	13.0071	17.1474	14.5164	15.2586	16.2948	11.2955	12.9301	9.36084	9.97369
578	L371 (m/z=802.527397; rt=4.36615)	19.9091	22.3586	28.2777	15.9052	15.688	11.7153	22.6478	14.666	15.7746	6.46458	14.1849	12.4738	12.0439	15.8793	9.65931	23.0294	17.2232	22.0994
579	L366 (m/z=802.492882; rt=4.36363)	18.3005	22.1348	28.3719	13.2661	15.8951	12.2229	20.0901	15.2123	16.4018	7.57595	14.5892	12.6309	9.58122	15.9641	9.8082	31.1861	16.2046	20.5643
580	L370 (m/z=803.53172; rt=4.36589)	21.0808	21.8001	27.5494	16.5409	14.8566	12.3935	14.8758	14.3742	16.173	10.0769	16.015	12.9869	12.59	15.0546	9.40882	24.8357	17.8995	21.4885
581	L369 (m/z=803.508335; rt=4.36568)	25.8772	22.562	27.518	19.7191	15.4551	12.4705	15.6607	14.9515	16.3081	11.1372	16.2831	13.072	13.2882	15.1667	9.65423	14.3176	15.5815	20.9771
582	L405 (m/z=804.547476; rt=4.42583)	14.2241	15.7967	19.2676	11.5874	13.6955	10.9956	11.519	13.7529	15.8204	25.8297	16.2582	14.8783	9.6925	18.661	12.2628	27.1473	21.8357	26.7753
583	L406 (m/z=804.542597; rt=4.42585)	17.304	15.7967	19.2676	14.0963	13.6955	10.9956	14.0131	13.7529	15.8204	9.77003	16.2582	14.8783	11.7912	18.661	12.2628	33.0254	21.8357	26.7753
584	L408 (m/z=804.580244; rt=4.42687)	14.218	16.6579	20.7971	10.2583	13.4325	11.2079	10.5597	12.2277	14.1362	23.9854	16.8922	13.8644	11.822	17.7434	11.8923	29.1567	23.0463	28.102
585	L411 (m/z=805.551155; rt=4.43045)	17.8267	18.7953	21.1575	17.6463	14.8921	11.4146	10.2773	11.3722	15.4486	9.43201	14.7526	14.3226	14.5344	17.7669	10.5977	30.2833	22.4208	27.059
586	L412 (m/z=805.546295; rt=4.43073)	17.8267	18.7953	21.1575	17.6463	14.8921	11.4146	10.2773	11.3722	15.4486	9.43201	14.7526	14.3226	14.5344	17.7669	10.5977	30.2833	22.4208	27.059
587	L420 (m/z=752.498548; rt=4.44469)	3.27686	5.18303	3.98581	4.0873	4.12639	2.24864	6.95089	4.81766	5.16256	3.87984	8.72466	5.83293	11.7008	14.8049	8.14057	70.1043	62.3433	74.6295
588	L393 (m/z=942.585674; rt=4.38964)	6.31178	7.54378	5.64507	6.89321	6.75939	4.31094	7.67369	7.59817	7.17969	6.45691	10.3085	9.68342	13.6867	17.3309	12.132	58.9777	50.4592	61.0489
589	L385 (m/z=986.613272; rt=4.38665)	5.14277	4.70784	4.97934	4.94646	3.94212	2.43128	6.84103	5.49264	5.97911	6.41238	9.73943	7.87453	11.7551	18.0465	10.6672	64.9022	58.0715	68.0685
590	L394 (m/z=942.548228; rt=4.39029)	6.53029	7.4987	5.62767	6.44844	7.07207	4.12605	10.0009	8.2661	8.25158	6.30435	10.4452	10.1438	13.3922	17.6542	12.1562	57.3238	49.0637	59.6947
591	L386 (m/z=987.618036; rt=4.3868)	5.41054	6.37864	5.63819	5.34524	5.71246	3.46214	9.85851	5.03445	6.33481	8.04343	10.1955	7.6486	14.4476	17.3766	10.977	56.8946	55.3023	65.9393
592	L383 (m/z=986.56821; rt=4.38593)	5.51352	5.5043	5.20789	5.15769	5.61314	3.45187	9.04501	5.65142	6.18959	6.86588	9.28216	7.96608	11.864	18.5668	11.1504	61.5539	55.3822	66.0341
593	L384 (m/z=987.581444; rt=4.38644)	5.07636	6.16828	5.6804	5.51828	5.36674	3.30041	10.3065	5.53904	6.28248	8.22267	10.8161	8.21758	15.0492	17.065	11.0403	55.827	55.0449	65.4788
594	L367 (m/z=930.589661; rt=4.36508)	5.43959	6.65817	6.6045	5.02367	5.18021	3.94537	8.34042	6.70024	6.59211	5.48947	11.2008	9.60943	15.4987	16.4492	11.0084	60.2082	53.8114	62.2402
595	L368 (m/z=930.560958; rt=4.36548)	5.67247	6.85835	6.95654	5.20801	5.23932	4.22306	8.6394	6.95756	6.67622	5.58895	11.7428	8.85744	15.8085	16.2715	11.2525	59.0826	52.9304	62.0342
596	L414 (m/z=832.501011; rt=4.43263)	7.26086	8.05271	7.62648	9.69877	8.72467	4.83257	9.68238	7.91488	7.77999	6.47395	13.3056	10.2959	11.2142	20.2128	9.842	55.6698	41.7893	59.6231
597	L382 (m/z=824.556741; rt=4.38466)	7.71582	8.5766	5.11625	7.24989	7.47915	3.89679	7.05114	5.31309	7.73591	7.25544	8.35601	7.06581	12.9747	14.3091	10.1076	57.753	55.966	66.0777
598	L421 (m/z=752.463855; rt=4.44574)	4.40969	5.06035	4.49989	4.2148	4.06967	2.36562	6.53148	4.56092	5.69745	4.47792	9.48441	6.20699	11.4434	15.4786	8.85007	68.9227	61.3461	72.38
599	L396 (m/z=980.625636; rt=4.39259)	9.18864	5.0852	4.15188	7.63012	4.78121	3.80608	8.59407	6.6103	6.88548	10.2839	9.59798	9.97863	12.5259	18.636	12.7513	51.7773	55.2893	62.4266
600	L395 (m/z=980.588855; rt=4.39213)	10.975	6.23807	4.31394	7.67956	5.05527	4.15887	5.78984	7.13894	6.60522	9.9083	9.53642	10.2716	14.1102	18.1245	13.6302	51.537	53.9068	61.0202
601	L422 (m/z=757.455369; rt=4.44747)	6.1548	7.20078	7.11305	5.82637	6.31987	4.86922	9.54427	8.36024	10.6928	9.85888	13.9583	13.1318	15.6731	19.8558	18.0348	52.9426	44.3051	46.1582
602	L423 (m/z=757.433746; rt=4.44758)	6.25027	7.32991	7.04497	5.92342	6.54681	4.83482	9.76212	8.57713	10.8384	10.0186	14.2563	13.2712	15.4073	19.8897	18.1988	52.6383	43.4002	45.8118
603	L372 (m/z=811.548908; rt=4.36809)	18.6771	11.016	17.7027	21.8034	15.42	11.5681	16.4504	17.6275	11.1965	13.3235	18.9156	15.124	10.9732	12.8837	15.8395	18.7724	24.1373	28.5693
604	L373 (m/z=810.535994; rt=4.37012)	21.524	20.5056	17.4301	23.3092	13.4396	12.2996	17.7905	13.7996	14.3859	9.1735	15.7332	11.7339	9.5487	15.8721	10.7922	18.6541	20.6499	33.3584
605	L375 (m/z=704.4901; rt=4.37276)	21.0984	21.2963	24.9929	20.4242	15.5795	12.5547	17.2708	13.0306	15.9318	9.32646	16.0872	15.2923	10.865	16.4969	11.0365	21.0151	17.5096	20.1918
606	L374 (m/z=704.473901; rt=4.37236)	21.4856	21.0481	22.216	19.9952	15.7445	12.7278	17.8067	12.4932	16.1099	9.86796	16.7425	16.2847	10.748	16.9331	11.4806	20.0965	17.0385	21.181
607	L376 (m/z=866.531649; rt=4.37571)	19.2569	16.3524	25.2102	16.605	15.3798	13.4637	17.9177	13.8304	14.4092	12.3044	15.5175	13.9437	17.1704	18.2829	14.6492	16.7455	20.6369	18.324
608	L379 (m/z=838.50633; rt=4.38072)	25.345	25.5734	32.1949	22.2363	16.1323	12.7585	18.2704	17.457	17.8027	7.89523	15.7333	13.3281	9.60084	14.566	10.6454	16.6522	10.538	13.2702
609	L377 (m/z=838.494291; rt=4.37985)	25.3893	25.5734	32.1949	22.2752	16.1323	12.7585	18.3023	17.457	17.8027	7.90903	15.7333	13.3281	9.44284	14.566	10.6454	16.6813	10.538	13.2702
610	L381 (m/z=838.515749; rt=4.38141)	25.4623	26.4147	32.8588	22.3393	16.663	13.0216	18.355	18.0312	18.1698	7.9318	16.2509	13.603	9.64531	15.0452	10.8649	16.2663	7.59498	11.4818
611	L380 (m/z=839.504151; rt=4.38093)	20.9228	25.2887	30.5328	18.2572	14.715	14.8838	15.8293	14.6606	16.0865	10.1622	16.5099	12.7056	14.319	17.4692	12.2399	20.5095	11.3567	13.5514
612	L378 (m/z=839.533048; rt=4.37985)	20.7515	24.6639	34.1012	18.4821	17.8911	14.9325	23.3233	17.0764	17.4439	13.63	18.5246	15.8682	12.9242	13.4451	11.9174	10.8889	8.39893	5.73674
613	L391 (m/z=808.573809; rt=4.38911)	23.1354	18.5133	26.7408	24.2718	17.4065	14.3203	19.7463	16.3155	16.5634	6.48691	15.2209	13.8457	10.5432	17.7497	10.4469	15.8163	14.7942	18.0828
614	L392 (m/z=808.546667; rt=4.38925)	23.074	18.4948	26.2427	24.1992	17.5019	14.1042	20.0493	16.2761	16.8559	6.65746	15.0303	14.3273	10.6935	18.0927	10.8657	15.3265	14.6042	17.6042
615	L389 (m/z=809.577932; rt=4.38891)	23.4204	19.8025	26.7371	23.9478	18.3876	14.3134	18.9194	15.5949	15.5117	6.76491	13.8169	14.5735	11.2826	17.4937	10.2006	15.6649	14.9043	18.6637
616	L390 (m/z=809.559042; rt=4.38898)	23.3285	19.7681	26.6282	23.855	18.4044	14.3859	19.0011	15.6641	15.6451	6.92936	13.9617	14.4388	11.3563	17.6035	10.3673	15.5298	14.5981	18.5349
617	L387 (m/z=810.581492; rt=4.3869)	21.7042	14.1359	24.2752	23.8966	19.977	15.8608	18.1525	17.4441	13.4011	8.03789	18.3271	11.9373	11.5365	17.3209	12.478	16.6723	12.795	22.0476
618	L388 (m/z=404.288091; rt=4.38845)	22.1093	18.8642	28.2744	23.4898	17.5909	13.7268	19.7175	16.567	16.5169	6.51826	15.4709	13.9444	11.4096	17.2282	9.93318	16.7555	14.2787	17.6043
619	L416 (m/z=784.519718; rt=4.43776)	30.7243	26.0785	27.5381	16.1888	13.6155	12.0129	21.3933	16.0873	15.9456	7.89488	16.4251	14.9834	9.51223	15.8055	9.53022	14.2864	11.9882	19.9898
620	L415 (m/z=784.507255; rt=4.43774)	31.1725	25.6729	27.5381	16.425	13.4037	12.0129	21.7054	15.837	15.9456	8.01004	16.1695	14.9834	8.19225	15.5596	9.53022	14.4948	13.3573	19.9898
621	L397 (m/z=666.473578; rt=4.40641)	25.1173	22.9493	30.5825	24.2914	17.9293	15.4172	19.7895	14.8092	16.6004	8.60634	14.4433	13.7172	9.71467	16.9931	8.66049	12.4808	12.8757	15.0222
622	L398 (m/z=832.541367; rt=4.41949)	12.2885	10.9396	8.25779	11.6161	11.8962	10.3711	7.77796	10.5116	7.38225	7.49554	12.7555	9.12653	9.15375	16.938	8.50972	51.6682	36.9591	56.3526
623	L401 (m/z=740.495881; rt=4.42094)	10.3604	12.4532	15.5497	11.1056	9.28549	7.01269	12.293	8.9582	10.5679	6.56975	13.0314	9.2344	11.3927	17.1842	8.73928	48.2785	39.0874	48.896
624	L399 (m/z=740.475111; rt=4.41972)	11.5277	13.2382	16.8631	12.4408	10.4281	7.90263	13.057	9.75991	11.653	7.02958	13.8935	9.96837	11.7748	17.7233	9.35935	44.1701	34.9571	44.2536
625	L402 (m/z=741.497333; rt=4.42134)	11.5352	11.3661	15.5451	10.6582	10.3559	8.31181	13.8603	9.7802	10.5504	6.686	13.5582	9.7323	12.634	17.0504	7.956	44.6263	37.8892	47.9044
626	L400 (m/z=741.483901; rt=4.42041)	12.0326	11.7275	16.1199	11.1178	10.5742	8.61914	14.4579	9.70467	10.9405	6.76994	13.9893	10.0922	12.1521	17.5925	8.25018	43.4697	36.4118	45.9781
627	L403 (m/z=982.602248; rt=4.42349)	12.0951	11.5563	11.3899	12.4089	9.14398	8.79468	18.0127	11.9602	10.9146	9.76282	17.0892	14.9657	15.4429	14.7582	9.7529	32.2776	35.4922	44.1822
628	L404 (m/z=982.634197; rt=4.42422)	13.4366	12.858	10.1715	13.9552	10.4492	9.19354	18.4899	12.3671	10.033	10.6113	13.5601	12.3663	11.862	14.5578	11.9167	31.645	36.2078	46.319
629	L407 (m/z=789.551703; rt=4.42614)	12.6337	17.0235	14.6754	16.0304	16.4275	18.6002	18.3702	16.3611	14.0684	16.8022	16.8364	16.5046	15.636	17.4421	18.3963	20.5275	15.9094	17.7551
630	L409 (m/z=788.547415; rt=4.43023)	15.4176	15.8515	19.2432	15.3255	16.1963	13.1569	16.5576	15.8317	16.4891	12.9883	15.6348	15.4661	12.6052	16.3784	13.8009	27.1058	20.1073	21.8438
631	L410 (m/z=788.547461; rt=4.43023)	15.4176	15.8515	19.2432	15.3255	16.1963	13.1569	16.5576	15.8317	16.4891	12.9883	15.6348	15.4661	12.6052	16.3784	13.8009	27.1058	20.1073	21.8438
632	L413 (m/z=805.582905; rt=4.43096)	15.8216	20.3583	18.1616	15.2122	14.2137	10.4628	13.0856	13.2079	14.4132	12.1009	14.9522	12.8775	13.9395	16.9463	17.253	29.8402	20.3215	26.8318
633	L418 (m/z=694.4695; rt=4.44016)	26.4344	27.4729	39.7983	32.8683	20.1494	18.4106	18.8163	16.6266	16.5304	8.40235	16.8777	12.0323	8.24488	14.9776	8.99326	5.23381	3.89574	4.23515
634	L419 (m/z=694.446053; rt=4.44017)	26.6897	27.1291	38.9888	33.1002	20.1782	18.8172	19.0842	16.8715	16.8221	8.59429	17.2024	12.6027	7.83681	14.9766	8.90342	4.69472	3.64214	3.86581
635	L417 (m/z=695.472326; rt=4.4398)	27.5025	28.5116	41.3987	32.303	20.3562	18.7426	19.2579	17.3069	17.6688	8.95683	18.7077	13.1953	7.39248	11.2286	4.87881	4.58728	3.889	4.11583
636	L424 (m/z=787.507502; rt=4.45464)	17.48	22.1354	24.4355	18.202	17.3614	15.155	18.5887	11.0012	16.7286	12.8752	19.0795	18.0531	18.1049	19.717	9.0245	14.7492	10.7054	16.6032
637	L425 (m/z=787.536516; rt=4.45528)	19.448	22.6265	24.3543	19.636	15.3304	13.711	20.3096	11.7484	17.5227	10.5636	18.5248	15.4477	11.9087	17.2876	10.28	18.1342	14.4823	18.6843
638	L440 (m/z=806.558876; rt=4.52927)	23.7611	23.6999	30.6703	27.6028	17.9691	12.7035	20.1819	14.6351	17.0755	6.63214	15.8888	12.6626	9.67648	15.0565	8.65842	12.1456	12.7507	18.2296
639	L441 (m/z=806.53752; rt=4.52932)	23.77	23.5084	30.5328	27.6019	18.2227	12.84	20.2408	14.6597	17.4135	6.73039	16.0386	12.8303	9.69871	14.8907	8.73163	11.9581	12.6799	17.6518
640	L444 (m/z=807.567292; rt=4.52954)	25.4573	24.6547	27.9454	26.2657	18.0855	14.0877	18.5018	14.0735	17.4844	7.97362	16.1848	13.4732	9.10841	14.9096	8.43832	12.6932	12.092	18.5709
641	L442 (m/z=807.545769; rt=4.52948)	25.5358	24.8943	27.7027	26.3848	18.1256	14.2876	18.6155	14.0523	17.6665	7.9557	15.9267	13.6644	8.902	15.0545	8.3539	12.6063	11.9465	18.3248
642	L426 (m/z=786.533625; rt=4.45641)	20.0208	19.471	27.7836	22.2254	17.0655	16.9828	17.8391	15.2758	15.9335	8.20339	16.1604	13.6403	12.9691	15.9437	10.1088	18.7422	16.0836	15.5511
643	L428 (m/z=786.513544; rt=4.45657)	20.0034	19.181	27.4821	22.5149	18.0188	17.3901	17.815	15.742	16.5588	8.33314	16.4233	13.4406	12.9388	15.7667	10.3685	18.3948	14.8682	14.7598
644	L427 (m/z=786.500729; rt=4.45655)	20.3685	18.9817	25.3519	23.609	20.5008	16.8503	17.9144	16.8614	16.1959	6.9044	16.4668	12.6186	13.7108	14.5781	9.76322	17.4929	12.6113	19.2201
645	L443 (m/z=403.280085; rt=4.52952)	22.2966	23.4754	26.6492	26.4103	17.4724	15.8688	20.1722	15.0519	17.1054	9.15647	14.8734	13.7369	8.70418	15.9264	10.2659	13.2602	13.2005	16.3738
646	L430 (m/z=834.591896; rt=4.48554)	20.2217	17.6077	24.6293	19.8034	19.2016	14.1488	17.3452	14.0833	13.8837	8.372	15.7574	12.7619	13.1978	17.4919	10.5967	21.0599	15.8581	23.9796
647	L429 (m/z=835.594523; rt=4.4844)	18.6747	15.7865	22.8022	18.651	16.5333	13.9299	16.1618	16.0187	14.5381	10.5796	16.724	14.3817	16.27	19.944	13.7492	19.663	14.9934	20.5989
648	L431 (m/z=828.542846; rt=4.50201)	23.301	18.9125	16.3836	20.5157	14.1349	10.8609	20.1263	13.6796	18.7964	9.61252	13.9046	14.9707	8.69538	17.8692	9.77131	17.7491	21.4992	29.217
649	L432 (m/z=828.554734; rt=4.50322)	23.7969	18.9125	16.3836	20.9523	14.1349	10.8609	20.5546	13.6796	18.7964	9.85228	13.9046	14.9707	8.88044	17.8692	9.77131	15.9635	21.4992	29.217
650	L433 (m/z=828.532246; rt=4.5065)	23.8444	18.9125	16.3836	18.8529	14.1349	10.8609	20.5956	13.6796	18.7964	9.64592	13.9046	14.9707	8.89816	17.8692	9.77131	18.163	21.4992	29.217
651	L437 (m/z=802.527813; rt=4.50699)	19.0998	23.8716	27.1098	20.8578	15.809	10.0051	18.2322	15.2112	14.5262	7.88669	12.8398	11.6537	11.3297	14.4936	10.1981	22.5938	17.7747	26.5071
652	L445 (m/z=784.506199; rt=4.53304)	21.4931	20.3578	24.6369	18.6303	15.8296	9.51344	18.7633	14.3869	15.2551	6.60802	12.4869	13.4021	11.4616	17.1193	10.519	23.0437	19.8195	26.6734
653	L446 (m/z=784.519202; rt=4.53317)	21.4931	20.3578	24.6369	18.6303	15.8296	9.51344	18.7633	14.3869	15.2551	6.60802	12.4869	13.4021	11.4616	17.1193	10.519	23.0437	19.8195	26.6734
654	L435 (m/z=803.53183; rt=4.50669)	19.4638	20.0805	23.2061	20.5481	11.5062	11.9473	16.8901	18.1313	13.7316	12.3262	14.1124	13.1814	10.2661	17.7545	10.5704	20.5057	18.4151	27.3633
655	L434 (m/z=803.509982; rt=4.50667)	19.9314	19.8504	23.713	22.6308	10.908	12.5902	16.9414	19.8082	14.5102	12.5022	14.2251	13.6382	10.2462	17.2317	10.2238	17.748	17.9766	25.3245
656	L436 (m/z=802.496346; rt=4.50679)	20.431	25.1367	29.2167	21.9909	18.1626	11.271	19.4687	16.7885	15.3423	11.6952	12.9934	10.2258	9.20275	13.598	9.92146	17.2114	13.3207	24.0228
657	L449 (m/z=830.527006; rt=4.536)	24.8457	11.3971	13.6769	13.7274	9.02771	8.75419	18.3349	13.5344	12.4735	11.3557	13.9605	11.461	11.052	15.5625	10.9552	20.6843	36.5177	42.6792
658	L438 (m/z=830.552884; rt=4.51603)	23.4517	11.5282	13.9676	13.1992	9.13144	9.01647	17.1967	13.1563	12.3657	10.5135	14.1277	11.4793	10.2078	16.559	10.8605	25.4311	35.4975	42.3104
659	L439 (m/z=785.519719; rt=4.52764)	13.5086	12.5745	23.9975	15.7766	14.1996	9.36833	14.8002	13.5197	15.444	8.22393	10.6202	10.075	15.3886	15.2721	9.37603	32.3021	33.8141	31.7392
660	L450 (m/z=785.488069; rt=4.5426)	12.1443	11.2326	20.2936	13.9979	12.0903	8.66955	13.1391	12.1101	13.7356	8.2051	9.15073	8.97674	15.7043	17.6383	11.7596	36.8093	37.778	36.5649
661	L447 (m/z=840.533472; rt=4.5346)	20.692	23.0233	26.1805	22.6942	16.1161	14.998	20.4321	18.615	17.1976	9.57127	14.2785	15.9505	8.75214	20.3359	14.3508	17.8583	7.63127	11.3227
662	L448 (m/z=840.523674; rt=4.53532)	20.692	23.0233	26.1805	22.6942	16.1161	14.998	20.4321	18.615	17.1976	9.57127	14.2785	15.9505	8.75214	20.3359	14.3508	17.8583	7.63127	11.3227
663	L451 (m/z=816.581033; rt=4.5497)	15.1781	16.3328	17.9081	16.0561	15.759	14.4952	17.2471	16.384	19.2274	13.6426	16.1747	18.2174	15.1688	18.3993	13.8716	22.7073	16.9501	16.2803
664	L453 (m/z=790.517958; rt=4.57223)	23.7378	24.9585	30.4743	24.9491	17.2083	14.5371	18.3764	15.5525	16.8952	9.21206	15.6263	14.8714	10.2673	15.4517	9.23926	13.4574	11.2028	13.9828
665	L452 (m/z=790.543574; rt=4.57147)	24.625	29.9275	32.013	27.4278	19.5223	13.2914	16.1584	14.4551	18.4452	8.92334	13.4456	13.6103	12.3167	13.2276	8.18576	10.5488	9.42188	14.4543
666	L454 (m/z=791.525027; rt=4.57228)	25.3456	25.8796	33.3394	26.7659	15.4774	12.9641	16.8049	16.2743	17.0146	8.43203	17.585	12.4078	10.2315	11.8713	7.1911	12.4201	12.9124	17.083
667	L455 (m/z=791.526549; rt=4.57265)	25.3456	25.8796	33.3394	26.7659	15.4774	12.9641	16.8049	16.2743	17.0146	8.43203	17.585	12.4078	10.2315	11.8713	7.1911	12.4201	12.9124	17.083
668	L456 (m/z=791.545954; rt=4.57343)	20.4954	25.5751	28.823	20.9692	14.9789	13.6739	20.3571	16.3105	18.1321	10.4849	16.4584	13.0773	12.8273	12.5718	8.10289	14.866	14.1053	18.1907
669	L457 (m/z=832.577763; rt=4.5818)	23.7479	19.4037	28.5575	15.6051	13.9431	11.7546	22.5628	16.2325	15.639	10.9527	15.3483	11.3441	11.6825	16.6011	11.6465	15.4489	18.4714	21.0583
670	L461 (m/z=702.473921; rt=4.59548)	23.2564	22.947	31.6001	20.9247	16.5393	13.311	19.9645	15.8846	15.4505	9.09793	14.9554	12.0915	12.2229	15.9804	8.74436	14.5335	13.6933	18.8025
671	L458 (m/z=690.473676; rt=4.58216)	16.8483	22.687	27.6918	25.7125	14.5066	12.6372	19.5261	13.0196	13.7812	9.94829	17.4137	13.2119	12.7678	18.1881	11.9172	15.1969	14.1851	20.7607
672	L460 (m/z=703.478255; rt=4.59419)	21.4828	22.9489	30.8975	21.1907	15.5225	13.4972	18.3416	14.8441	16.243	10.1225	14.2628	14.4988	13.7977	15.9961	8.71359	15.0647	16.4256	16.1499
673	L459 (m/z=814.566186; rt=4.587)	21.6355	12.0697	15.4982	12.5777	16.6179	12.9256	8.23929	15.4897	10.8788	12.9339	13.0342	17.8148	24.5823	25.4325	13.646	20.0312	17.3561	29.2366
674	L463 (m/z=812.549016; rt=4.61247)	18.8364	19.4508	20.252	20.2007	14.9518	11.2675	16.0116	16.9653	14.7422	11.4276	15.5357	13.1288	10.2303	16.2345	9.19228	23.2934	16.8618	31.4172
675	L465 (m/z=812.524535; rt=4.61686)	19.1234	18.5712	19.8333	21.6666	15.6428	11.2608	15.698	17.7962	15.2492	9.23821	15.2918	13.674	10.8597	15.2632	8.28887	23.4141	17.4347	31.6939
676	L462 (m/z=813.552936; rt=4.61126)	18.3272	18.5402	20.9901	17.5609	14.4081	10.8444	18.8407	16.7548	12.4761	10.1968	15.029	12.5937	14.8354	16.3162	9.60491	20.239	18.9518	33.4909
677	L464 (m/z=813.532753; rt=4.61316)	12.9776	18.2253	21.658	18.0796	15.7486	11.0026	19.1399	17.3	12.3749	9.90745	14.8924	12.2486	15.7797	16.264	9.27758	24.1157	17.5698	33.4384
678	L468 (m/z=654.335292; rt=4.62217)	5.99336	5.76579	6.80528	16.5878	11.891	10.6557	12.69	6.95539	8.67662	6.83736	11.8913	7.32944	10.417	15.2872	9.85687	47.4745	48.2093	56.6761
679	L469 (m/z=654.3202; rt=4.62222)	5.90045	5.75586	6.86531	16.5129	11.9451	10.6947	12.7795	6.96565	8.73123	6.87413	11.9933	7.34398	10.4311	15.2151	9.89173	47.5019	48.125	56.473
680	L467 (m/z=655.341099; rt=4.62179)	6.09965	6.88507	6.71861	16.4374	11.5248	10.5142	11.7782	7.05895	8.96563	5.24214	9.61618	6.98169	9.30178	12.5178	7.12774	51.1409	52.3972	59.6921
681	L466 (m/z=655.327482; rt=4.62176)	6.02894	6.90687	6.75058	16.5684	11.5933	10.744	11.8092	6.98894	9.02675	5.2364	9.69776	7.00466	9.34279	12.7098	7.41266	51.0142	52.1033	59.0614
682	L470 (m/z=682.366845; rt=4.62285)	14.5224	14.7129	18.3148	26.7059	20.4299	14.7949	16.0551	10.8196	15.2373	5.77416	12.3898	11.0366	8.96666	12.6564	8.04835	27.9758	28.9915	32.5682
683	L471 (m/z=832.565407; rt=4.62405)	18.9721	21.6829	29.2265	23.6485	19.8089	10.6197	20.0052	12.6705	12.8726	14.1726	14.7923	12.5241	9.7598	16.8239	10.4061	13.4418	14.2215	24.351
684	L472 (m/z=814.566896; rt=4.64567)	17.2125	17.0944	21.4193	14.1335	13.7381	11.1467	15.3476	14.8607	12.4453	8.47413	18.9242	12.3358	15.4053	15.9674	11.5191	29.4268	19.4151	31.1338
685	L475 (m/z=814.563796; rt=4.64632)	17.2125	17.0944	21.4193	14.1335	13.7381	11.1467	15.3476	14.8607	12.4453	8.47413	18.9242	12.3358	15.4053	15.9674	11.5191	29.4268	19.4151	31.1338
686	L477 (m/z=814.544329; rt=4.64688)	17.019	16.8279	20.6762	13.7983	13.9209	11.2887	15.2796	15.1325	12.7356	7.05144	19.085	12.6583	16.1251	15.769	11.8537	30.7266	19.2648	30.7874
687	L473 (m/z=814.598303; rt=4.64612)	15.5347	16.3189	23.257	13.4035	16.077	12.2535	13.0059	16.0415	12.004	17.9971	17.4181	11.3353	13.4442	14.3181	9.23993	26.6145	19.8263	31.9102
688	L474 (m/z=815.567381; rt=4.64622)	14.6104	17.0523	20.1496	18.3006	13.4157	11.4501	15.5087	15.5053	16.3092	10.4329	16.0299	10.0501	15.3076	17.0192	13.4461	25.8397	20.9775	28.5949
689	L476 (m/z=815.567378; rt=4.64649)	14.6104	17.0523	20.1496	18.3006	13.4157	11.4501	15.5087	15.5053	16.3092	10.4329	16.0299	10.0501	15.3076	17.0192	13.4461	25.8397	20.9775	28.5949
690	L480 (m/z=716.490424; rt=4.6594)	19.3893	19.0235	25.3094	20.7975	15.2056	12.7832	16.2301	14.4592	13.1598	6.32952	14.7758	12.1481	11.5983	17.2771	8.23635	25.6552	19.2588	28.3631
691	L479 (m/z=716.467353; rt=4.65931)	18.9261	18.9255	25.6987	21.1736	15.1189	12.7569	16.283	14.6344	13.5485	6.50704	15.0527	12.3089	11.7106	17.2015	8.64195	25.3996	19.067	27.0449
692	L481 (m/z=717.495229; rt=4.65952)	18.9728	17.7553	26.0361	20.4658	15.7327	12.2275	18.5407	13.6006	14.6179	10.5863	15.0436	13.4979	9.80698	17.3	8.31505	21.6273	20.5678	25.3056
693	L482 (m/z=717.475541; rt=4.65971)	18.7169	17.2584	26.7638	20.3572	15.5389	12.2517	18.5674	13.466	14.8778	10.6331	15.0101	13.5722	9.7928	17.6858	8.35045	21.9327	21.0408	24.184
694	L489 (m/z=789.550473; rt=4.72916)	20.0897	21.0579	24.1572	19.6219	17.1669	12.484	17.0271	11.9548	16.9154	10.6025	13.473	12.1704	11.7506	14.5101	8.27759	20.9083	21.8374	25.9954
695	L478 (m/z=358.245487; rt=4.65895)	17.0722	17.6335	20.4999	19.9217	14.6863	13.7959	15.0512	14.2439	14.9817	9.98823	15.2938	14.8709	13.389	18.0461	10.057	24.5777	20.0964	25.7945
696	L483 (m/z=964.623494; rt=4.67873)	8.98788	11.1711	10.5966	14.9929	12.8714	7.5652	15.392	12.0417	8.05267	9.74109	10.8059	8.60559	12.8697	12.5217	10.4583	38.0165	40.5883	54.7216
697	L484 (m/z=790.567767; rt=4.68055)	19.1099	15.3178	25.3954	23.5713	18.9881	13.9739	15.0293	11.7365	16.0807	10.7348	19.7368	10.8552	10.6499	15.2466	7.6266	20.9047	18.9741	26.0682
698	L485 (m/z=790.551231; rt=4.68213)	18.4322	15.4845	26.1376	24.4445	19.9459	13.7949	15.784	11.2579	16.7948	7.92422	16.0114	8.85838	11.0265	16.6187	6.51605	22.3885	20.6816	27.8982
699	L487 (m/z=810.528834; rt=4.69109)	14.3002	13.8781	20.8057	13.006	12.6842	8.49008	18.2982	13.6772	13.2722	8.28756	11.4442	11.18	15.9271	22.1006	9.97575	30.1809	26.2157	36.2762
700	L486 (m/z=810.554675; rt=4.69039)	18.0868	12.7552	20.0577	14.6127	13.1063	9.64962	17.8334	13.4798	12.119	8.6263	11.6341	10.7651	13.6161	21.7851	10.1659	27.2247	27.2395	37.2428
701	L488 (m/z=820.515641; rt=4.70551)	14.0185	15.3059	11.6598	11.83	9.23981	8.14826	17.6429	12.4635	12.222	10.9021	11.6597	10.2379	14.5596	12.6577	10.8801	31.0469	38.6734	46.852
702	L490 (m/z=788.591712; rt=4.72925)	19.2636	18.7155	19.4422	17.7481	14.914	11.6304	14.7647	17.0489	14.0365	7.58497	13.7911	9.1744	18.2473	13.1173	19.1041	22.3913	22.4132	26.6124
703	L491 (m/z=788.547762; rt=4.73069)	21.3746	19.2601	26.1838	19.4542	14.182	10.2853	16.1654	16.9519	14.4291	6.94711	16.8528	11.6945	9.60624	13.3417	10.3767	26.4525	19.4115	27.0307
704	L493 (m/z=892.57477; rt=4.74184)	7.42597	9.21368	10.3095	9.34765	8.55214	5.32943	10.2899	8.38129	8.61566	6.38949	12.8085	11.451	15.2545	18.6767	14.431	51.2925	42.3677	49.8635
705	L492 (m/z=892.549887; rt=4.74176)	7.81068	9.433	10.4407	9.83192	8.75572	5.4416	10.7277	8.5808	8.75581	6.72051	13.1134	11.642	13.9167	18.765	14.5198	50.9925	41.3521	49.2
706	L494 (m/z=774.530527; rt=4.74892)	21.5782	18.7557	27.5644	25.5409	17.2375	15.1306	18.0336	18.4579	15.6351	12.8438	18.7216	15.8357	10.9998	15.3653	14.3391	11.0036	11.4619	11.4951
707	L495 (m/z=774.531637; rt=4.74897)	21.5782	18.7557	27.5644	25.5409	17.2375	15.1306	18.0336	18.4579	15.6351	12.8438	18.7216	15.8357	10.9998	15.3653	14.3391	11.0036	11.4619	11.4951
708	L496 (m/z=774.563392; rt=4.753)	23.5281	25.5946	30.9276	18.6591	14.8837	13.6955	21.1661	16.3073	19.4873	11.0222	17.4512	15.4429	0.887681	6.39025	0.695899	24.7368	19.3729	19.7508
709	L504 (m/z=716.490613; rt=4.75652)	16.5805	17.8294	25.335	17.5676	14.1103	11.8304	16.545	13.3271	15.7011	6.35955	15.3737	12.7375	13.1742	18.4984	11.062	29.7731	20.8611	23.334
710	L503 (m/z=716.466985; rt=4.75651)	17.0637	18.3452	25.7264	18.2009	14.3784	12.0796	16.6013	13.5353	16.2002	6.55459	15.8702	12.9239	13.6242	18.4902	11.1703	27.9553	19.3807	21.8995
711	L500 (m/z=717.495534; rt=4.75643)	16.4641	17.4159	25.315	18.3469	13.6688	11.4091	17.563	12.3621	15.8286	7.41597	16.6638	13.8543	12.0864	19.7297	10.3194	28.1236	20.1597	23.2736
712	L502 (m/z=717.475129; rt=4.75648)	16.7508	17.5515	25.5846	18.6277	13.8007	11.6489	18.0422	12.6044	15.9447	7.37222	16.7681	13.9392	12.1053	19.751	10.3841	27.1017	19.5242	22.4984
713	L501 (m/z=358.245647; rt=4.75648)	15.793	17.6124	24.7247	18.5595	14.1069	12.5292	17.2414	13.6452	16.0386	6.56291	15.7843	13.2247	13.4133	18.4963	11.4669	28.4298	20.3549	22.0159
714	L499 (m/z=718.496493; rt=4.75592)	18.6017	18.9792	21.5154	17.3348	13.5011	11.8269	14.7858	13.0838	17.4291	9.89121	17.8873	13.5445	13.6138	16.9412	11.4682	25.7728	19.6073	24.216
715	L497 (m/z=718.486128; rt=4.75589)	18.725	18.9792	21.5154	17.4498	13.5011	11.8269	14.8838	13.0838	17.4291	9.92352	17.8873	13.5445	13.5771	16.9412	11.4682	25.4408	19.6073	24.216
716	L498 (m/z=358.747454; rt=4.7559)	15.9889	17.3098	25.3246	18.2161	13.7843	11.2913	16.6633	12.4977	14.9178	9.20511	15.9035	13.9523	14.2153	19.5902	10.7862	25.7113	20.9145	23.7278
717	L553 (m/z=783.469576; rt=4.8356)	7.7645	11.6232	12.9363	10.5259	10.1503	8.32204	14.6856	12.4148	16.3097	9.88538	17.9615	18.8278	22.5218	22.5014	22.5213	34.6168	25.3488	21.0829
718	L517 (m/z=785.47504; rt=4.79753)	8.79842	12.1939	13.734	10.5019	11.2057	10.3772	14.6508	12.2272	16.1629	10.988	17.6385	18.1318	22.2127	22.7238	19.3356	32.8482	24.0109	22.2586
719	L518 (m/z=785.494043; rt=4.79813)	8.79842	12.1939	13.734	10.5019	11.2057	10.3772	14.6508	12.2272	16.1629	10.988	17.6385	18.1318	22.2127	22.7238	19.3356	32.8482	24.0109	22.2586
720	L545 (m/z=784.47138; rt=4.83394)	8.41928	10.6159	12.6866	10.0917	10.56	8.89575	14.3509	13.2369	15.2259	11.0035	18.22	19.7422	21.3063	22.9217	23.1722	34.8284	24.4455	20.2774
721	L515 (m/z=786.483892; rt=4.79151)	8.10593	11.5501	11.8634	9.58755	10.1179	9.13081	17.229	12.7129	15.6929	10.9267	17.3391	15.8246	20.9584	23.2599	22.2548	33.1924	25.0201	25.2335
722	L510 (m/z=786.507196; rt=4.78247)	7.63627	9.12802	10.3757	8.47359	9.87072	8.00419	16.7633	11.5835	15.1293	11.1551	17.2833	15.9875	20.5727	25.792	22.6715	35.399	26.3424	27.8318
723	L505 (m/z=787.518637; rt=4.75843)	9.72763	10.0531	16.8244	9.91857	11.4627	10.0162	12.0925	11.7996	14.4358	15.7819	13.2022	16.4044	21.2542	24.554	19.8525	31.2252	28.9283	22.4667
724	L552 (m/z=391.735645; rt=4.83558)	9.37097	11.1451	12.5423	9.39974	10.2904	9.29907	14.2396	13.0428	16.3713	9.23364	18.822	19.9347	23.2835	23.0027	21.9584	34.4725	23.697	19.8943
725	L512 (m/z=787.486257; rt=4.78656)	10.8454	12.0827	10.8612	12.2508	12.8033	13.8762	12.8964	12.5647	15.53	14.6054	16.2308	18.6945	20.502	22.9828	19.5141	28.9001	23.3357	21.5239
726	L506 (m/z=784.526098; rt=4.76814)	15.425	23.4355	31.5504	10.8389	14.4415	15.2963	12.3014	13.5802	17.7841	12.5008	17.751	11.7642	22.0666	18.3173	9.35841	26.8674	12.4745	14.2466
727	L508 (m/z=804.546739; rt=4.77266)	19.2773	22.9419	27.1233	26.6261	19.4254	14.3849	17.6567	16.2447	18.7848	12.3612	15.4346	15.5581	10.3063	15.7426	12.3121	13.7724	10.2107	11.8368
728	L507 (m/z=804.525086; rt=4.77216)	19.1924	23.2117	27.1356	26.324	19.1588	14.9222	18.3095	16.2177	18.8413	13.2472	15.7819	15.6908	10.0193	16.0397	12.3835	12.9075	9.59013	11.0265
729	L509 (m/z=805.546835; rt=4.77347)	18.846	22.1204	24.1321	19.9813	16.8707	14.6633	20.2831	15.9259	18.2997	13.0778	14.6384	15.7608	12.9116	17.3102	14.8974	14.9002	13.1343	12.2467
730	L516 (m/z=826.538869; rt=4.79283)	11.0609	12.7169	10.9024	11.5191	10.1426	8.49303	12.2972	13.1861	11.1788	9.65384	12.5789	8.00543	13.4809	10.9981	12.7328	41.9881	40.3774	48.6876
731	L511 (m/z=826.52302; rt=4.78467)	14.8889	18.6719	15.2261	15.5056	13.0611	8.6034	16.553	19.3609	15.612	11.3211	8.5471	10.5313	13.6277	12.4563	17.0375	28.1037	27.9027	32.9897
732	L513 (m/z=392.743865; rt=4.78876)	12.2889	13.9038	15.9163	11.3527	14.8847	12.6566	18.3976	13.1652	14.192	12.8774	16.1528	16.6199	17.7726	18.6618	18.8538	27.3109	23.2317	21.7613
733	L514 (m/z=801.457779; rt=4.7914)	11.4257	14.3303	15.9266	15.5518	10.4328	13.1218	14.4276	12.58	14.4234	13.6055	14.6933	17.6009	19.4191	23.8117	17.5832	25.5703	24.152	21.3441
734	L532 (m/z=780.528128; rt=4.81081)	3.44863	5.50511	5.55393	3.67303	4.33865	2.70338	6.04888	5.64852	7.64195	9.02863	10.3408	9.418	12.7789	19.3101	12.6336	65.0219	54.8568	62.0492
735	L555 (m/z=778.514556; rt=4.83582)	4.10801	6.1294	6.29269	4.39708	4.83927	2.64048	7.20967	5.64345	7.30573	4.21556	10.7558	9.28927	12.4898	18.7648	11.9056	67.5799	53.8674	62.5663
736	L528 (m/z=781.533075; rt=4.80941)	3.31673	5.95226	5.5892	4.03387	4.26732	2.62591	6.62328	5.62969	7.82907	4.41161	10.1772	9.40681	13.343	18.891	12.7255	68.2715	55.0826	61.8235
737	L551 (m/z=779.518897; rt=4.83557)	3.65621	5.66988	6.42715	3.96287	4.42913	2.78899	6.22942	5.71306	7.1133	10.0929	10.465	9.77353	12.057	19.3537	12.1244	64.0016	54.3692	61.7726
738	L549 (m/z=779.489377; rt=4.83552)	4.1006	5.97241	6.54596	4.7996	4.62401	2.9463	7.47889	6.03719	7.31858	4.70998	10.7713	10.0514	13.5366	19.3914	12.4033	65.3743	53.2037	60.7345
739	L526 (m/z=782.53676; rt=4.80873)	3.44641	5.32674	5.67067	4.39493	4.56377	2.84927	5.38284	5.77182	7.47824	9.16032	10.4451	9.46427	13.2631	18.5371	12.7599	64.3524	55.3554	61.7777
740	L525 (m/z=390.265432; rt=4.80859)	3.14818	5.10962	5.26786	3.32184	4.22688	2.61417	5.7717	5.5911	7.06113	8.36116	9.71112	8.60366	12.0954	17.4916	12.1451	67.3018	57.8697	64.3081
741	L546 (m/z=389.258146; rt=4.83539)	4.29229	6.47956	6.61948	4.44122	5.00971	2.77589	7.37633	6.02621	7.27769	4.24412	10.4904	9.22075	12.9606	17.99	11.6855	66.6854	54.0042	62.4207
742	L531 (m/z=780.472015; rt=4.81072)	2.72767	4.72995	5.14737	3.16941	3.69128	2.23534	5.14649	4.81587	7.18789	8.48569	10.0101	9.08035	11.3184	19.875	13.0654	69.1523	56.8778	63.2837
743	L547 (m/z=778.455723; rt=4.83541)	3.66164	5.89995	6.36963	3.55122	4.52265	2.3461	6.33636	5.49002	7.47711	10.3397	11.0037	9.70185	11.1353	18.8939	11.9348	64.9758	54.1898	62.1705
744	L533 (m/z=583.439282; rt=4.81096)	3.8002	5.96714	7.31441	4.43345	4.86253	3.08761	6.47813	5.06729	8.82337	10.2518	11.468	10.235	11.6164	20.9113	13.2728	63.42	51.7238	57.2668
745	L524 (m/z=782.504008; rt=4.80826)	4.02074	5.9107	6.01145	5.12194	4.71284	2.87197	6.19958	6.42062	7.67242	4.18262	10.6996	9.59409	14.8793	18.8695	12.8207	65.5958	53.3867	61.0294
746	L522 (m/z=781.477023; rt=4.80729)	4.74005	5.38732	5.26858	4.92311	4.16862	3.15497	5.31361	5.30765	7.1105	5.26201	9.18252	9.07583	12.1095	18.5657	13.1646	67.6518	57.3882	62.2255
747	L538 (m/z=783.537361; rt=4.81341)	6.98695	10.0075	7.92649	7.31952	8.07998	5.83554	11.0122	9.15804	10.0106	6.90481	11.2768	11.2911	14.1143	15.6842	13.0005	53.6622	45.7935	51.9358
748	L523 (m/z=390.767452; rt=4.80774)	4.61288	5.84743	5.50376	5.66354	4.2907	2.61951	6.34524	5.50928	7.75801	5.58205	10.0855	9.32189	12.8137	17.5027	12.8112	64.9826	56.7644	61.9856
749	L534 (m/z=745.493126; rt=4.81139)	6.5298	7.37308	7.02251	8.21848	5.28064	4.49046	7.26133	5.85173	7.57433	5.5405	10.0482	9.1962	12.7802	17.1353	12.4545	59.6697	54.3111	59.262
750	L548 (m/z=778.566698; rt=4.83544)	3.65923	5.6508	6.34087	3.85721	4.83463	2.56907	6.12571	5.37289	7.16261	9.58088	10.428	9.03575	11.1858	17.8874	12.0581	65.5911	55.8263	62.8335
751	L529 (m/z=583.423061; rt=4.80981)	6.01525	6.22404	7.50029	6.89155	5.24115	3.29573	7.50827	5.3125	9.20264	6.08076	11.9178	10.1174	12.5309	20.9258	13.6094	60.9733	50.3787	56.2745
752	L520 (m/z=260.180026; rt=4.80647)	5.15025	4.99718	5.51124	5.47518	5.36871	3.88453	5.91003	4.75257	6.52456	5.79825	9.68821	8.72099	11.3595	17.1887	11.7618	66.3068	58.0047	63.5968
753	L557 (m/z=808.55929; rt=4.84721)	10.2135	14.8149	15.5619	8.32413	8.34624	7.7754	9.70559	9.16916	11.4448	10.3933	11.4243	10.9386	11.926	16.827	11.6139	49.4375	39.4184	42.6653
754	L544 (m/z=808.543061; rt=4.83352)	13.2868	16.6662	19.037	11.4567	10.6916	10.3018	12.4196	9.7378	13.3426	12.2407	13.7691	13.824	13.4836	19.1797	12.8702	37.1126	29.9555	30.6245
755	L527 (m/z=781.589217; rt=4.80932)	5.43443	7.74436	6.01474	4.13947	6.42146	3.93368	9.12883	7.02902	8.62761	4.92122	9.72545	8.89626	12.3815	15.8434	12.1034	63.9946	53.2363	60.4243
756	L521 (m/z=824.559558; rt=4.80697)	5.28478	4.08986	4.01308	4.94047	3.85928	3.35959	6.96949	4.42807	5.1871	4.16359	6.44014	6.55801	10.1603	17.4424	10.9542	68.4813	63.7402	69.928
757	L550 (m/z=389.756667; rt=4.83557)	4.15446	5.96339	6.67788	3.96829	4.53986	2.97336	6.60838	5.80682	7.34638	10.6001	10.9702	9.98921	12.986	20.1221	12.6384	61.6827	52.5976	60.3748
758	L554 (m/z=389.762262; rt=4.83566)	4.15446	5.96339	6.67788	3.96829	4.53986	2.97336	6.60838	5.80682	7.34638	10.6001	10.9702	9.98921	12.986	20.1221	12.6384	61.6827	52.5976	60.3748
759	L530 (m/z=391.269306; rt=4.8107)	7.64025	6.52243	6.6237	6.93181	7.74571	5.11542	6.00329	5.70984	9.20395	7.63935	12.8394	11.1551	15.1803	16.5241	11.5	56.605	50.6585	56.4018
760	L535 (m/z=746.485037; rt=4.8115)	7.34057	7.05379	6.66348	8.35072	6.04805	5.14504	12.6749	7.30593	6.54249	8.43158	13.0017	9.17874	13.1504	16.4532	12.4668	50.0518	50.1374	60.0034
761	L536 (m/z=746.503308; rt=4.81194)	7.45198	7.01037	6.68705	9.09475	6.96314	4.80945	12.5111	6.92414	6.56564	8.49139	12.9217	9.21122	13.0458	16.3519	12.5109	49.405	49.8288	60.2157
762	L540 (m/z=391.277009; rt=4.81662)	10.3044	11.3124	5.55743	7.44138	8.40577	6.2664	13.1636	7.10081	8.45797	8.33944	9.35987	9.67059	10.1931	15.2191	11.6206	50.5581	48.602	58.427
763	L537 (m/z=584.442856; rt=4.81312)	6.14546	7.47858	6.94229	5.90389	5.47406	4.66037	7.69505	7.36747	8.0149	7.06711	11.5255	10.2327	12.4943	18.7588	13.5047	60.6942	49.3956	56.645
764	L519 (m/z=826.566902; rt=4.80063)	9.31432	10.3397	9.76872	8.06834	9.13363	7.60987	11.7991	8.5044	8.95555	8.57302	11.8082	9.95599	14.199	16.2293	13.809	48.0462	43.9848	49.9009
765	L539 (m/z=784.50747; rt=4.81367)	15.2417	15.6802	21.2364	7.06575	9.66254	10.2958	11.9271	11.2585	11.9994	11.4836	15.4434	16.2221	19.9979	21.1885	21.7771	34.284	26.7668	18.4692
766	L556 (m/z=799.442777; rt=4.84088)	10.3361	15.9736	18.3501	15.7334	12.817	9.095	15.0994	12.1128	17.4263	9.97869	18.7534	19.0065	20.3913	19.6657	20.9223	28.4611	20.6775	15.1998
767	L542 (m/z=678.473587; rt=4.82447)	20.1988	19.046	24.0184	23.7649	16.1748	12.2551	19.245	13.9849	17.7583	10.4325	18.0672	15.2313	11.3962	16.5136	11.3786	14.9627	16.2134	19.3583
768	L541 (m/z=678.455444; rt=4.82428)	20.0903	20.9488	23.9554	24.1543	16.1915	12.5147	19.2795	13.3172	17.5938	10.3125	17.0368	14.994	11.8636	17.0581	11.4134	14.2997	15.4476	19.5287
769	L543 (m/z=802.473002; rt=4.82827)	11.7288	18.505	24.1247	15.6769	13.8243	13.2397	17.9683	12.2911	14.8608	13.3694	17.8338	18.3099	21.1013	20.7357	15.771	20.1553	16.8101	13.6939
770	L558 (m/z=806.539357; rt=4.85137)	23.2291	21.0929	23.8473	22.2482	12.9613	12.9973	17.2852	11.9833	14.209	10.7131	16.1368	12.7219	12.4657	19.3852	14.8899	14.0586	18.4405	21.3346
771	L559 (m/z=806.556985; rt=4.85308)	23.4365	19.1243	23.4944	22.1145	12.9441	13.0231	17.4485	11.8727	15.2607	8.9868	17.1773	12.5336	11.2324	19.3031	14.6695	16.7813	19.5785	21.0188
772	L620 (m/z=986.612313; rt=4.91768)	13.4352	9.78395	11.6502	18.0847	7.8182	8.55633	9.43227	8.30655	11.837	7.9854	15.4939	11.3601	24.2096	17.1091	14.6226	26.8528	41.4883	41.9738
773	L621 (m/z=986.585901; rt=4.91791)	13.4875	9.82268	11.8701	18.3388	8.03679	8.9316	9.37301	8.61493	12.0865	8.27473	16.1132	11.4113	24.358	17.0008	14.9808	26.168	40.4116	40.7197
774	L562 (m/z=796.526243; rt=4.86442)	15.6461	10.1515	12.3267	12.2656	7.52786	6.61149	11.6433	8.39533	12.6448	8.59305	15.177	11.9715	23.7437	18.4625	14.5105	28.1083	40.2858	41.935
775	L563 (m/z=796.532857; rt=4.86454)	15.6461	10.1515	12.3267	12.2656	7.52786	6.61149	11.6433	8.39533	12.6448	8.59305	15.177	11.9715	23.7437	18.4625	14.5105	28.1083	40.2858	41.935
776	L560 (m/z=796.512432; rt=4.86379)	14.0589	10.1515	12.3267	12.6751	7.52786	6.61149	10.803	8.39533	12.6448	8.87994	15.177	11.9715	24.5364	18.4625	14.5105	29.0467	40.2858	41.935
777	L619 (m/z=987.614556; rt=4.9171)	10.4733	9.1201	12.741	20.3596	9.62107	9.83523	9.69403	10.2683	11.3486	10.3521	13.5813	11.1392	26.1006	18.3699	15.5815	23.0203	39.0394	39.3545
778	L561 (m/z=796.486616; rt=4.864)	14.5437	11.5192	12.4577	13.6462	8.3921	7.02182	16.5477	9.43404	13.0783	13.6999	14.7892	12.8819	20.4862	17.8218	14.2481	21.0763	38.0437	40.3122
779	L564 (m/z=742.496038; rt=4.87003)	16.5455	17.5287	22.9371	20.6064	15.5225	12.1236	17.2024	14.9457	17.9558	7.32096	16.2433	15.0183	15.9046	18.3585	12.4424	22.4201	17.4013	19.5228
780	L565 (m/z=742.513855; rt=4.87059)	16.5455	17.5287	22.9371	20.6064	15.5225	12.1236	17.2024	14.9457	17.9558	7.32096	16.2433	15.0183	15.9046	18.3585	12.4424	22.4201	17.4013	19.5228
781	L567 (m/z=743.510116; rt=4.87535)	15.5348	15.2767	19.7596	16.3594	14.1844	12.8449	17.6011	16.2923	18.6718	12.1908	18.8768	16.538	14.0804	18.2067	13.002	24.2334	17.163	19.1836
782	L581 (m/z=789.610535; rt=4.89698)	19.6836	12.9568	9.61344	7.90927	10.9708	5.77472	7.0233	10.0856	7.75091	4.62451	11.7537	7.22011	9.91022	14.6902	7.12525	50.849	39.5429	62.5156
783	L586 (m/z=788.613377; rt=4.89771)	22.3188	13.1153	10.747	6.83591	10.3202	4.85954	6.38514	7.87599	7.99002	2.8088	9.78643	4.7823	6.64447	12.4793	6.69568	55.0068	46.4227	64.9255
784	L566 (m/z=832.638918; rt=4.87486)	25.672	15.5638	12.251	7.2225	7.98184	4.81794	6.30528	10.963	8.03044	4.00327	8.92413	7.26832	6.51932	12.8362	7.35216	50.2776	43.731	60.2801
785	L568 (m/z=802.535644; rt=4.88137)	13.1675	21.844	23.1699	15.8117	15.9721	13.0616	10.9159	11.4236	13.5202	10.5098	16.8337	18.2081	19.3929	13.4865	10.4487	30.2022	20.4401	21.5915
786	L569 (m/z=789.554005; rt=4.88913)	21.7433	18.2075	26.0483	21.7763	18.1999	11.8927	17.1316	17.5581	15.9769	8.42601	15.4503	13.846	12.3595	17.1379	9.68852	18.5632	13.4463	22.5475
787	L570 (m/z=394.274766; rt=4.88964)	18.6821	14.2604	17.7419	20.1177	16.5339	16.5635	18.6242	18.2913	16.1967	16.5236	17.254	16.4292	14.9835	16.9316	15.5911	11.0688	16.7288	17.4775
788	L571 (m/z=788.558731; rt=4.89256)	15.9544	18.3319	17.983	17.5134	16.4062	9.68746	13.6628	14.956	12.4116	4.82304	13.2541	9.53834	8.80321	15.4073	8.43778	39.2431	21.6444	41.9419
789	L583 (m/z=970.615341; rt=4.89707)	4.48552	6.01265	6.51585	5.08525	5.33558	3.45289	8.67177	6.38229	8.01303	5.61126	11.8109	10.0738	14.4983	18.5105	12.5255	61.6479	51.9481	59.4189
790	L578 (m/z=971.619572; rt=4.89653)	4.37187	6.08644	6.18312	5.09996	5.66376	3.82609	8.87074	6.33463	7.52677	5.55065	11.526	9.77951	14.648	18.3363	12.8308	61.4588	52.0529	59.8537
791	L580 (m/z=971.586649; rt=4.89673)	4.46776	6.19624	6.17029	5.17193	5.81495	3.92263	9.04649	6.4479	7.59549	5.75617	11.6336	9.85939	14.8254	18.2731	12.9466	60.7323	51.6343	59.5056
792	L585 (m/z=970.561489; rt=4.8976)	4.58864	6.02473	6.39555	5.10261	5.43209	3.53381	8.84665	6.52735	8.05081	5.77067	12.0091	10.1844	14.7208	18.3127	12.5177	60.9706	51.6941	59.3176
793	L613 (m/z=968.602064; rt=4.91105)	5.1194	7.01635	7.35344	6.1483	5.55522	3.72607	8.97363	6.89637	8.61385	5.95584	11.9459	10.3301	15.2901	18.5178	12.9656	58.5127	50.0684	57.011
794	L576 (m/z=972.623201; rt=4.89637)	5.07448	6.32335	6.3088	5.7292	5.60714	3.82136	8.78391	6.46958	7.38486	6.01243	11.4746	10.0856	14.7383	18.6787	12.5713	59.6617	51.4467	59.8281
795	L615 (m/z=968.557067; rt=4.91145)	5.34822	7.36284	7.60284	6.59315	5.89795	3.93605	9.61688	7.44423	8.94303	6.90222	12.4746	10.815	15.8576	18.5507	13.5149	55.6819	48.2696	55.1882
796	L577 (m/z=972.594009; rt=4.89651)	5.16176	6.47894	6.32216	5.88544	5.74264	3.91557	9.50842	7.1214	7.45713	6.1612	11.5137	10.1878	14.8428	18.5416	12.7668	58.4404	50.6018	59.3505
797	L612 (m/z=969.604967; rt=4.91092)	6.12136	7.28498	7.36857	5.81264	5.50191	4.12464	9.17495	7.06075	8.19801	6.13912	11.4208	10.3969	14.6195	19.1085	13.2165	58.1324	49.623	56.6954
798	L579 (m/z=485.313088; rt=4.8966)	4.54496	6.29096	6.79901	5.11299	5.58059	3.57164	8.87214	6.79587	8.45834	5.53269	11.9352	10.3687	15.5914	18.3293	12.9656	60.3458	51.068	57.8368
799	L582 (m/z=485.304028; rt=4.89699)	4.54496	6.29096	6.79901	5.11299	5.58059	3.57164	8.87214	6.79587	8.45834	5.53269	11.9352	10.3687	15.5914	18.3293	12.9656	60.3458	51.068	57.8368
800	L614 (m/z=969.558773; rt=4.91106)	6.38928	7.44625	7.5257	6.11148	6.43172	4.49315	10.5934	8.09635	8.53834	6.33254	11.953	11.04	15.1006	18.9861	13.6266	55.4727	47.0866	54.7763
801	L589 (m/z=973.619876; rt=4.89907)	7.43037	8.65106	8.07723	7.18217	6.92449	5.64928	10.4233	9.75009	10.0577	7.56312	13.5434	11.4671	16.1707	16.9788	13.1913	51.2303	44.1521	51.5574
802	L604 (m/z=973.58013; rt=4.90579)	7.82335	10.3312	8.52648	8.38967	7.25089	6.04893	10.9208	10.3936	11.5014	7.96569	14.4228	11.698	17.0308	15.5889	13.3183	47.8697	42.0126	48.9068
803	L575 (m/z=485.809248; rt=4.89618)	4.54959	6.01567	6.57586	5.55052	5.70768	3.76786	8.95429	6.78501	7.56535	5.41452	11.8434	10.6275	15.6618	19.0805	13.4953	59.8693	50.5678	57.9681
804	L574 (m/z=485.818764; rt=4.89606)	4.22665	5.93298	6.61567	5.44551	5.65148	3.53906	8.71212	6.33152	7.45463	5.22913	11.5007	10.468	15.3552	19.0399	13.3267	61.0314	51.5434	58.5959
805	L630 (m/z=485.306997; rt=4.94296)	5.38904	7.32358	8.3893	5.55174	6.39075	4.63335	9.70482	6.9339	10.343	5.48263	11.8326	9.9488	15.0166	17.232	12.0633	58.8552	50.2872	54.6222
806	L607 (m/z=974.571778; rt=4.90822)	11.2125	14.1742	11.2598	10.3337	11.3889	9.54678	15.4324	14.448	12.3181	11.8532	17.1441	16.2	18.3884	16.9813	18.1784	32.7797	25.8635	32.497
807	L573 (m/z=611.47042; rt=4.89589)	4.95552	6.3013	7.76515	4.64547	5.39742	3.41942	8.22345	6.86712	7.78571	4.97801	12.13	10.0841	14.2033	18.7722	13.0261	62.9943	50.532	57.9195
808	L572 (m/z=611.459144; rt=4.89571)	4.98475	6.40349	7.87485	4.76138	5.43036	3.34178	8.48357	6.80087	7.80875	4.67966	12.1766	10.1915	14.518	18.9576	13.361	62.5726	50.231	57.422
809	L610 (m/z=484.305093; rt=4.91022)	5.78689	6.69221	7.84838	5.41969	5.87639	3.79337	9.64405	7.24412	9.06366	6.46376	12.8543	11.2731	16.3798	20.1391	14.3146	56.3058	47.1939	53.7068
810	L611 (m/z=484.299709; rt=4.91038)	5.78689	6.69221	7.84838	5.41969	5.87639	3.79337	9.64405	7.24412	9.06366	6.46376	12.8543	11.2731	16.3798	20.1391	14.3146	56.3058	47.1939	53.7068
811	L598 (m/z=974.61416; rt=4.90165)	9.51	12.909	9.15799	9.43874	10.3499	7.65297	13.0126	11.5493	11.8031	8.79906	13.8485	13.4048	16.973	17.988	16.2914	42.2666	33.3553	41.6897
812	L593 (m/z=794.537664; rt=4.90028)	10.974	15.2166	19.0333	9.76108	11.8977	9.26243	13.6468	12.7194	14.5952	6.66026	15.4479	12.8569	14.3657	18.4225	11.6867	44.5921	26.296	32.5655
813	L595 (m/z=794.508886; rt=4.90098)	11.9195	15.8474	19.4881	10.5413	12.6608	9.86184	14.5526	13.1645	15.1048	6.90975	15.9046	13.4802	15.4743	18.2462	11.9662	40.6026	24.1765	30.0988
814	L584 (m/z=795.54141; rt=4.8972)	10.9971	15.0775	18.4915	10.4417	11.4881	8.91825	14.8662	12.219	15.0015	6.93109	15.6029	13.5495	15.0221	18.868	11.4683	41.7418	26.7445	32.5709
815	L592 (m/z=795.543285; rt=4.90003)	10.9971	15.0775	18.4915	10.4417	11.4881	8.91825	14.8662	12.219	15.0015	6.93109	15.6029	13.5495	15.0221	18.868	11.4683	41.7418	26.7445	32.5709
816	L594 (m/z=795.518685; rt=4.9005)	11.26	15.1943	18.456	10.5961	11.6494	9.77354	15.0904	13.2569	14.7143	7.23	15.7267	14.2656	15.2928	18.4145	11.9229	40.5308	25.7582	30.8676
817	L603 (m/z=792.525319; rt=4.90538)	13.4399	18.1121	22.5668	12.8712	12.2652	9.06048	15.5048	12.0656	14.0111	8.21492	15.378	12.6833	14.0484	18.3051	11.1028	35.9207	23.874	30.5755
818	L609 (m/z=792.519626; rt=4.9098)	13.4399	18.1121	22.5668	12.8712	12.2652	9.06048	15.5048	12.0656	14.0111	8.21492	15.378	12.6833	14.0484	18.3051	11.1028	35.9207	23.874	30.5755
819	L588 (m/z=794.492845; rt=4.89898)	12.3127	17.3038	20.4087	10.6221	13.7816	10.3395	15.1767	13.7559	15.6351	7.62524	16.989	14.2586	15.6318	16.839	12.6292	38.6315	21.3307	26.7289
820	L617 (m/z=792.547432; rt=4.91539)	10.7957	17.7184	21.748	9.51831	11.8742	8.51403	15.0568	11.616	13.8191	9.63074	15.0593	12.2782	14.4857	18.655	11.0754	40.5127	25.0772	32.5653
821	L608 (m/z=793.525527; rt=4.9093)	15.3014	18.3536	23.4037	13.6021	13.9382	10.1055	17.2315	13.1034	13.7311	7.19219	15.3678	13.0423	15.295	16.803	11.7186	31.3778	22.434	27.9987
822	L587 (m/z=397.269964; rt=4.89811)	10.621	16.0443	18.922	10.7128	13.1693	9.33768	12.3339	12.3106	15.1391	8.25196	15.2182	13.4996	15.1554	17.6793	11.7387	42.9249	25.5783	31.3628
823	L591 (m/z=397.268576; rt=4.89983)	10.621	16.0443	18.922	10.7128	13.1693	9.33768	12.3339	12.3106	15.1391	8.25196	15.2182	13.4996	15.1554	17.6793	11.7387	42.9249	25.5783	31.3628
824	L590 (m/z=397.274241; rt=4.89973)	10.8612	15.6155	18.9019	10.2145	12.7444	9.09485	12.4276	11.8989	14.8571	7.83857	15.041	13.1101	14.4761	18.0605	11.4376	44.1821	26.6397	32.5985
825	L596 (m/z=776.51135; rt=4.90157)	6.73204	5.73556	6.77647	7.88959	4.95663	5.53397	10.4321	5.81338	6.54022	8.06418	11.299	9.13724	22.6376	38.2661	12.7259	44.2445	33.9294	59.2863
826	L601 (m/z=776.485274; rt=4.90422)	7.38709	5.7787	7.25278	8.57885	5.2898	6.20721	8.09803	6.06742	6.97496	8.93173	12.1131	9.34847	27.191	39.6204	13.2964	39.8133	31.1306	56.9202
827	L616 (m/z=774.49399; rt=4.91337)	5.56121	6.26348	8.68102	7.70371	5.52105	5.82213	11.197	5.68955	8.10801	6.78879	11.1716	10.0369	23.0292	36.2462	12.1205	45.7201	35.1082	55.2314
828	L622 (m/z=774.490816; rt=4.9215)	5.56121	6.26348	8.68102	7.70371	5.52105	5.82213	11.197	5.68955	8.10801	6.78879	11.1716	10.0369	23.0292	36.2462	12.1205	45.7201	35.1082	55.2314
829	L623 (m/z=774.510302; rt=4.92332)	5.85371	7.05928	8.70062	8.07848	5.40137	5.87012	11.1569	6.03415	8.71522	7.48995	10.2559	9.76473	23.7088	37.8125	11.6177	43.7121	33.4367	55.3316
830	L599 (m/z=975.570645; rt=4.90281)	10.8758	13.5343	13.7652	13.0081	15.8032	12.9324	16.7959	16.6995	15.7678	15.7161	21.0575	22.5102	22.3478	17.3511	20.2826	21.2563	15.5543	14.7419
831	L597 (m/z=976.57399; rt=4.90165)	11.4506	13.7088	13.8601	12.6362	13.1893	11.7987	17.5406	15.3962	17.671	13.6075	19.5502	20.5438	24.4874	19.2363	19.9651	20.2777	18.9193	16.1613
832	L624 (m/z=848.523794; rt=4.92577)	14.4666	14.79	21.603	12.4656	9.42953	8.87923	13.7482	10.1457	13.1435	12.3187	14.7685	13.9665	19.7157	26.1588	17.1486	27.2853	24.7074	25.2592
833	L600 (m/z=850.537216; rt=4.90343)	13.4327	14.9933	21.2218	14.4487	12.4125	13.5672	15.5897	12.9234	14.6801	12.5834	15.4311	16.1146	20.6091	24.1932	14.6329	23.3364	20.0465	19.7834
834	L602 (m/z=844.531717; rt=4.90518)	13.1969	10.6207	12.258	10.817	13.6681	9.8383	14.2906	14.5715	9.8238	12.2095	19.0281	13.7908	15.1094	20.5466	17.1318	34.3766	21.5651	37.1573
835	L605 (m/z=843.527252; rt=4.90645)	10.8799	15.5822	14.9232	10.6026	13.0159	6.34803	13.3114	10.4732	11.6753	9.13523	18.4798	10.6727	14.1789	15.2647	11.9461	41.892	27.1842	44.4347
836	L606 (m/z=832.526805; rt=4.90808)	8.90256	5.97354	11.5019	7.6699	6.50921	8.64049	13.2538	10.1715	6.12989	8.91204	13.3699	15.7981	22.6911	32.8941	22.2251	38.5707	31.0818	35.7046
837	L618 (m/z=832.526833; rt=4.91642)	8.90256	5.97354	11.5019	7.6699	6.50921	8.64049	13.2538	10.1715	6.12989	8.91204	13.3699	15.7981	22.6911	32.8941	22.2251	38.5707	31.0818	35.7046
838	L631 (m/z=832.526925; rt=4.94563)	8.56675	6.21573	9.47556	8.23483	6.55925	12.1735	11.939	9.1663	7.92123	8.95915	13.7416	14.2851	22.0833	32.0763	19.2146	40.2169	32.2408	36.93
839	L635 (m/z=849.527124; rt=4.94971)	15.4497	12.722	17.2326	14.3146	11.288	17.8426	14.3507	11.4473	11.3268	13.3548	16.022	17.1015	17.5684	23.5894	14.4188	24.9619	24.9313	22.0776
840	L625 (m/z=849.527236; rt=4.92751)	15.1959	13.2387	20.2213	13.5916	13.6232	16.0798	13.6259	12.0633	9.94988	13.216	15.3473	16.714	17.1703	22.2314	17.6412	27.2004	23.4961	19.3939
841	L626 (m/z=787.538077; rt=4.93435)	22.9846	23.7015	30.0721	27.2204	18.396	14.6805	16.755	14.3701	20.8834	10.0816	14.876	13.888	10.4274	14.5846	8.90915	12.531	14.0718	11.5669
842	L627 (m/z=786.53413; rt=4.93455)	24.7005	23.2595	30.4321	23.6606	17.3534	13.1448	16.0829	14.609	18.7741	8.51556	14.2483	13.487	8.53169	12.8773	10.4653	18.5087	17.6526	13.6966
843	L628 (m/z=789.555027; rt=4.94026)	26.4915	17.4976	20.8631	8.70131	19.5595	12.2237	15.2999	11.0723	18.4544	3.44682	12.2544	10.4411	9.27056	17.3551	13.9999	36.7899	22.2612	24.0178
844	L629 (m/z=787.496937; rt=4.94149)	18.1125	18.5592	30.6146	23.199	12.9981	11.7472	14.5764	11.0409	17.4472	13.5527	17.4034	14.3891	13.3596	16.6289	13.6887	17.1998	23.3695	12.1131
845	L632 (m/z=810.555224; rt=4.94575)	17.972	21.1856	24.2247	21.4072	14.5188	17.3341	18.3448	17.293	15.3128	12.6624	14.1461	8.33295	18.094	12.4641	9.70239	11.5196	20.3924	25.0931
846	L633 (m/z=810.530376; rt=4.94704)	19.032	20.9064	25.1816	20.6593	13.2136	17.8721	18.9801	17.3097	15.5964	12.6261	16.1808	7.8795	17.345	12.8934	9.62832	11.3575	19.4961	23.842
847	L634 (m/z=786.486972; rt=4.94739)	14.2233	10.4986	16.0163	15.2051	10.0007	8.55362	13.2721	13.1072	16.0209	8.80297	17.8173	16.6305	16.6385	18.8973	17.2249	31.8581	29.6789	25.5537
848	L648 (m/z=780.529036; rt=4.9531)	3.1045	4.25346	4.42044	4.02168	3.9911	2.16634	6.42179	4.98844	5.98126	3.61318	9.1076	6.64594	12.6522	16.0779	10.2806	70.1866	61.5814	70.5054
849	L649 (m/z=780.528818; rt=4.9531)	3.1045	4.25346	4.42044	4.02168	3.9911	2.16634	6.42179	4.98844	5.98126	3.61318	9.1076	6.64594	12.6522	16.0779	10.2806	70.1866	61.5814	70.5054
850	L644 (m/z=781.532906; rt=4.95285)	3.06761	4.54799	4.85065	3.51739	4.16044	2.60379	6.51975	4.67259	5.52391	3.85604	9.23379	7.31679	11.6626	16.6209	9.7902	71.3766	60.7642	69.9147
851	L645 (m/z=781.532657; rt=4.95286)	3.06761	4.54799	4.85065	3.51739	4.16044	2.60379	6.51975	4.67259	5.52391	3.85604	9.23379	7.31679	11.6626	16.6209	9.7902	71.3766	60.7642	69.9147
852	L662 (m/z=816.506285; rt=5.01503)	6.75932	10.1147	8.32487	7.02736	6.30059	3.43561	9.80746	6.63217	7.40749	4.9255	11.628	9.8484	12.3518	16.6944	10.0024	59.1286	48.6301	60.9812
853	L667 (m/z=821.461698; rt=5.01641)	10.1177	15.8562	14.9357	12.9263	11.1943	8.322	14.6739	10.9733	13.5533	10.084	14.3568	15.3495	16.3731	20.6486	18.1227	35.825	26.9709	29.7168
854	L651 (m/z=390.265654; rt=4.95322)	4.33084	4.52271	4.21997	3.62968	3.9725	2.33413	6.71201	4.75953	5.47509	3.46542	9.22214	6.78259	12.8863	16.2243	10.0227	68.9757	61.2988	71.1656
855	L660 (m/z=817.509592; rt=5.01432)	7.11553	10.5054	8.37943	7.91648	7.30832	3.69807	9.20537	6.83308	7.74233	6.04329	11.6089	9.47525	13.0952	16.2406	9.70591	56.6241	47.5037	60.999
856	L665 (m/z=818.50693; rt=5.01555)	8.36085	10.0685	8.56968	7.60711	6.98443	3.6149	9.52461	6.43088	6.93034	6.0008	11.6079	8.56976	12.8569	16.3024	10.4072	55.6497	48.6059	61.9081
857	L640 (m/z=782.535505; rt=4.95227)	2.59968	5.14073	4.3444	4.06296	3.55317	2.58257	6.79784	5.14206	6.83879	7.07831	9.52369	7.62419	10.4676	17.2896	8.97738	68.9937	59.3507	69.6327
858	L652 (m/z=782.504994; rt=4.9534)	5.18237	5.00724	4.35168	6.33155	3.76987	4.1954	7.12881	5.85385	6.98148	4.9221	10.2055	7.69849	10.9055	17.0944	9.13589	65.5296	58.0692	67.6371
859	L670 (m/z=816.548577; rt=5.01763)	4.92097	9.56928	8.33672	6.73776	5.19297	3.15827	7.86816	5.3549	7.21486	6.95234	11.1107	9.44243	12.006	18.2801	9.7868	61.5148	50.4921	62.0609
860	L666 (m/z=817.5506; rt=5.01627)	8.02416	11.629	7.64983	4.4519	6.70244	3.49688	9.1076	7.01678	8.88925	5.49575	12.0541	10.2259	15.1135	15.5834	9.94639	57.8071	47.0144	59.7917
861	L638 (m/z=781.589073; rt=4.95185)	5.20601	7.34371	7.51988	0.513956	0.773726	0.50082	5.84901	8.64788	7.98407	8.79776	13.7666	11.8952	17.6805	15.1464	9.93006	61.9528	54.3217	62.17
862	L663 (m/z=818.471707; rt=5.01516)	7.50675	11.6886	9.26809	7.71581	7.71713	4.02266	10.8503	7.46967	9.04044	6.62812	13.2196	8.90576	15.921	15.8606	10.6085	51.378	44.0445	58.1545
863	L636 (m/z=583.438992; rt=4.95077)	5.07553	7.48329	5.2603	5.48676	4.66406	3.41273	6.83697	4.59573	5.77058	5.91663	8.00667	7.425	7.34836	13.0858	8.81602	69.3358	62.1645	69.3154
864	L650 (m/z=781.477537; rt=4.95317)	5.55713	5.76629	4.22812	4.80789	6.18902	3.18328	7.07105	5.18228	5.23905	6.3888	8.97429	6.53659	10.0842	15.369	9.39529	66.0909	58.5191	71.4177
865	L661 (m/z=818.554508; rt=5.01452)	9.27903	11.769	9.41798	0.779662	3.21332	0.435408	11.8836	9.20589	9.19555	11.1925	14.6514	10.4145	14.8996	18.1104	11.8797	51.9657	43.05	58.6569
866	L639 (m/z=780.601868; rt=4.95212)	0.555136	1.06743	0.657032	1.2335	0.813878	0.928894	1.42141	1.17157	1.02	1.38875	6.51087	1.3313	16.6039	27.2648	17.247	78.7973	63.1715	78.8158
867	L646 (m/z=390.767486; rt=4.95286)	6.25595	5.72453	4.84711	6.78672	6.33855	4.27076	7.35798	6.23356	5.58489	7.05177	8.84572	7.52431	9.98628	16.242	9.10631	62.5613	56.6156	68.6666
868	L647 (m/z=390.765844; rt=4.95295)	6.24062	5.74842	4.84711	6.77189	6.36501	4.27076	7.36053	5.8422	5.58489	7.05421	8.88265	7.52431	9.98974	16.3098	9.10631	62.583	56.8519	68.6666
869	L637 (m/z=583.423482; rt=4.95125)	6.86164	8.13275	5.4737	7.68307	6.8085	5.12907	7.91126	6.13425	5.89933	5.53911	8.39131	7.9768	7.80541	13.1338	9.24202	64.1995	57.3994	66.2791
870	L641 (m/z=785.49476; rt=4.95249)	6.6912	11.0195	9.90574	10.6649	11.5367	7.66763	12.1401	12.4603	15.5835	9.57286	17.2352	17.6776	21.508	21.8114	19.9585	39.423	25.9369	29.207
871	L642 (m/z=785.484747; rt=4.9527)	6.6912	11.0195	9.90574	10.6649	11.5367	7.66763	12.1401	12.4603	15.5835	9.57286	17.2352	17.6776	21.508	21.8114	19.9585	39.423	25.9369	29.207
872	L643 (m/z=785.475774; rt=4.95277)	6.6912	11.0195	9.90574	10.6649	11.5367	7.66763	12.1401	12.4603	15.5835	9.57286	17.2352	17.6776	21.508	21.8114	19.9585	39.423	25.9369	29.207
873	L653 (m/z=790.56451; rt=5.00949)	25.9212	25.1966	29.768	21.4293	16.8982	10.9936	17.775	14.4239	17.2543	9.35265	16.2549	14.3153	10.4596	13.0696	10.9387	15.0622	14.1568	16.7301
874	L654 (m/z=790.548373; rt=5.00952)	26.0926	25.2473	29.8654	21.571	17.0215	10.957	17.8926	14.5291	17.4683	9.36957	16.3735	14.3828	10.5288	13.1649	10.9573	14.5454	13.6636	16.3693
875	L656 (m/z=791.549219; rt=5.00987)	27.2896	25.3235	29.6284	20.4501	19.1043	13.1973	19.2831	14.3435	16.5673	7.1491	16.5413	14.5422	10.8726	11.4974	10.491	14.9555	13.1899	15.5738
876	L655 (m/z=791.571729; rt=5.00967)	27.9905	24.8894	29.7678	20.6652	18.8282	12.6981	18.9229	13.9471	16.6606	6.69335	16.2901	14.3594	10.5557	12.1382	10.2448	15.1723	13.907	16.2693
877	L659 (m/z=395.282615; rt=5.014)	24.5282	23.2424	25.8968	19.4869	16.0672	12.8854	17.9186	14.7533	19.4664	10.0258	16.5143	13.8336	11.6236	14.8291	10.7171	16.417	14.5937	17.2007
878	L658 (m/z=827.539411; rt=5.01399)	22.4361	23.5432	28.3482	21.3709	17.6542	12.7272	17.2536	16.5939	12.8748	11.1708	15.0152	15.5509	13.5282	12.6473	10.4493	14.2405	14.5462	20.0497
879	L657 (m/z=827.52213; rt=5.01227)	21.8311	22.1042	27.0058	21.5875	18.0168	12.1416	16.4883	16.5893	12.7656	11.1576	14.7929	14.8889	13.7243	12.2516	10.3827	15.2112	16.2453	22.8155
880	L664 (m/z=828.509645; rt=5.01521)	20.2483	22.4114	27.4888	22.3237	17.8913	16.9995	17.4608	18.9619	14.2967	13.0188	15.2977	10.6797	12.3278	8.68675	13.5047	14.6207	16.7509	17.0306
881	L669 (m/z=828.540189; rt=5.01755)	18.4439	29.3212	33.0497	21.6085	17.7202	12.793	23.7678	16.4861	16.2014	9.14206	13.3297	12.9649	11.4923	12.3783	9.57467	15.5453	10.7645	15.4164
882	L668 (m/z=828.529762; rt=5.01712)	19.7235	28.248	33.0497	23.1076	17.0716	12.793	19.8903	15.8827	16.2014	9.45634	12.8418	12.9649	11.8257	11.9252	9.57467	15.9965	14.0308	15.4164
883	L671 (m/z=822.463007; rt=5.02013)	8.0717	14.6419	14.4352	11.9929	11.2467	9.38796	14.2803	14.2446	15.8505	12.4267	17.1036	18.9166	18.0171	17.7387	18.7624	35.2113	25.0245	22.6473
884	L673 (m/z=814.575262; rt=5.04338)	15.7556	18.1594	17.7541	14.7273	13.0683	10.6614	15.55	11.3988	12.4221	7.03554	15.1871	12.1747	11.5524	17.8609	9.45759	35.3792	24.3255	37.5302
885	L675 (m/z=814.562839; rt=5.04404)	15.4406	18.1594	17.7541	14.4328	13.0683	10.6614	15.2391	11.3988	12.4221	8.89421	15.1871	12.1747	11.3214	17.8609	9.45759	34.6719	24.3255	37.5302
886	L676 (m/z=814.553616; rt=5.04449)	15.4406	18.1594	17.7541	14.4328	13.0683	10.6614	15.2391	11.3988	12.4221	8.89421	15.1871	12.1747	11.3214	17.8609	9.45759	34.6719	24.3255	37.5302
887	L672 (m/z=815.567107; rt=5.04212)	16.4726	17.8204	19.7697	13.6197	13.2904	10.2857	14.7129	12.1599	14.5329	8.58827	14.6219	12.5546	17.7047	19.4163	8.83003	28.9018	22.6911	34.027
888	L677 (m/z=836.604221; rt=5.04905)	23.9719	18.3139	23.9869	21.638	19.2866	14.1253	20.7486	14.734	14.547	6.87537	14.4275	12.0627	9.92865	18.3827	10.2921	16.8374	14.8552	24.9861
889	L674 (m/z=836.578991; rt=5.04352)	24.153	15.5219	20.1579	21.8549	17.5808	11.7327	20.4123	13.5219	13.0086	6.74918	13.6204	11.2741	10.5491	17.7216	9.6193	16.2816	22.0335	34.2073
890	L679 (m/z=778.514392; rt=5.051)	4.43833	5.98988	4.45112	4.94122	4.2936	2.27192	6.94551	5.35859	4.48157	4.11816	9.47682	6.17742	10.8616	14.4185	8.93563	68.6952	60.4626	73.6823
891	L693 (m/z=1006.593793; rt=5.10162)	7.56464	13.9146	13.6235	10.3113	9.40238	5.84822	12.8857	9.07003	10.1116	7.78201	15.2918	11.5873	16.58	17.7127	13.1788	44.8764	34.6085	45.6506
892	L694 (m/z=1006.55835; rt=5.10177)	7.71521	13.9227	13.577	10.463	9.61515	5.61518	13.0068	9.22772	11.1996	7.66061	15.376	12.8435	16.654	17.676	14.4736	44.5004	34.1824	42.2911
893	L680 (m/z=779.517753; rt=5.05109)	4.9776	5.93193	4.4063	5.86731	4.99063	2.9181	6.76152	5.53829	5.05213	5.24114	8.22307	6.41182	12.0857	15.6599	8.82457	65.0667	59.6561	72.3871
894	L681 (m/z=779.518724; rt=5.05112)	4.9776	5.93193	4.4063	5.86731	4.99063	2.9181	6.76152	5.53829	5.05213	5.24114	8.22307	6.41182	12.0857	15.6599	8.82457	65.0667	59.6561	72.3871
895	L692 (m/z=1007.594574; rt=5.09929)	8.35708	13.1228	12.0203	9.75337	9.66176	6.49935	11.3402	8.48428	10.6436	7.0444	13.6825	13.0567	18.0428	19.9495	12.5934	45.4621	35.0992	45.1867
896	L678 (m/z=778.475363; rt=5.0503)	5.4417	7.37079	4.81548	5.96129	5.98269	3.1626	8.50276	6.78476	4.56184	5.26977	8.99887	6.42627	10.2926	13.995	8.43084	64.5319	56.8679	72.603
897	L682 (m/z=783.469663; rt=5.05258)	8.37141	8.99318	8.96212	11.1072	6.97251	6.15176	11.1489	10.5126	11.1439	9.80704	13.3438	13.2131	16.418	23.6653	16.5409	43.1474	36.5126	43.9882
898	L691 (m/z=1008.590818; rt=5.09888)	9.0349	14.1436	11.3823	10.6019	8.9011	6.95132	12.0198	9.7665	10.3395	7.40631	14.9073	12.7001	16.5046	19.7247	13.8288	44.4325	32.5568	44.7979
899	L695 (m/z=964.669269; rt=5.11411)	7.20063	9.4007	9.11061	7.56044	6.99939	3.63998	13.2778	9.1456	9.11869	10.8719	15.3919	12.9161	16.9473	13.8261	9.15368	44.1419	45.2363	56.0609
900	L683 (m/z=778.566989; rt=5.0536)	0.764604	0.822934	1.77568	1.18247	0.990372	0.561587	1.66365	1.26176	2.62906	11.2952	14.445	8.35831	18.7757	24.9526	11.156	66.3184	57.5273	75.5193
901	L684 (m/z=786.536835; rt=5.06196)	22.9958	24.1763	30.0373	22.3777	16.4235	13.2834	18.7615	16.8804	15.8278	10.7954	15.8491	13.1374	10.6495	15.6012	8.11489	14.4201	11.0696	19.5993
902	L689 (m/z=804.523926; rt=5.0817)	26.8987	24.7667	25.9017	19.3078	19.1843	12.6555	16.7265	17.7057	17.5894	9.7224	14.1316	17.9796	10.8594	11.1324	8.92939	16.4852	13.0793	16.9444
903	L688 (m/z=804.539538; rt=5.07933)	26.4461	25.6952	25.8013	18.1527	18.7393	12.2943	15.7503	18.0262	17.4396	10.2427	14.3667	17.5679	13.3119	10.467	9.13108	16.0963	12.7056	17.7658
904	L686 (m/z=804.547664; rt=5.07773)	26.2264	25.9405	25.2922	18.0019	18.9182	12.0518	15.6194	18.1983	17.0955	10.9886	14.5038	17.2213	13.2012	9.61228	10.924	15.9625	12.8269	17.4152
905	L685 (m/z=804.566647; rt=5.0755)	25.5515	25.1425	24.4478	16.3096	18.4592	10.5586	15.0818	19.4256	16.5332	12.3615	15.0879	16.9476	16.1289	9.91654	13.6093	14.5667	11.9683	17.9036
906	L687 (m/z=787.538946; rt=5.07792)	21.4492	22.4996	30.975	21.6373	17.2524	11.8255	15.5189	12.3601	16.5213	9.7017	13.8053	13.2273	11.2646	13.4922	8.81135	20.4283	20.5904	18.6396
907	L690 (m/z=830.511992; rt=5.09241)	16.4329	26.9438	27.6529	18.8564	18.1534	12.1197	18.7179	9.2293	14.8358	9.29533	17.665	14.4801	15.6906	12.3024	9.69994	21.0069	15.7061	21.2116
908	L696 (m/z=964.624911; rt=5.11444)	9.55852	6.86165	5.59404	9.45385	8.30901	5.44991	11.8204	9.4267	6.62223	10.1784	10.4004	9.96175	11.0753	16.0512	11.5278	47.9137	48.951	60.8443
909	L697 (m/z=964.628956; rt=5.11462)	9.55852	6.86165	5.59404	9.45385	8.30901	5.44991	11.8204	9.4267	6.62223	10.1784	10.4004	9.96175	11.0753	16.0512	11.5278	47.9137	48.951	60.8443
910	L698 (m/z=789.587463; rt=5.1255)	20.6812	21.756	15.9141	17.208	16.0536	13.9087	18.716	14.8577	10.9623	14.4366	16.6237	18.7785	1.4336	13.3046	12.1986	27.5246	17.4045	28.2378
911	L699 (m/z=788.591609; rt=5.1264)	21.0869	12.6479	15.6302	20.6345	21.5908	15.3818	20.8094	19.0224	11.282	1.3787	10.8078	8.14805	12.1816	15.9768	15.4976	23.9089	19.9543	34.0604
912	L701 (m/z=788.546324; rt=5.12672)	20.6492	18.7968	19.7069	15.3845	13.5693	10.2318	13.2837	13.8179	13.4205	7.85529	14.8589	9.59934	10.2839	14.5266	9.61483	32.5433	24.4305	37.4266
913	L700 (m/z=789.551052; rt=5.12657)	21.0537	19.6094	21.1982	11.7119	10.9509	9.67786	12.8536	11.8966	12.7241	7.97288	14.2577	12.8909	16.7645	19.7549	9.59615	29.6434	23.5305	33.9128
914	L702 (m/z=852.553187; rt=5.16227)	18.2731	19.3154	21.0811	21.8028	13.5542	17.1184	18.4819	20.4905	13.1893	12.5891	20.8225	10.1574	11.7627	9.76246	13.7624	17.0905	16.055	24.6913
915	L703 (m/z=812.552043; rt=5.19169)	15.5546	22.9069	23.7912	16.4615	18.4444	16.8615	19.3105	13.2083	15.469	12.956	17.2886	11.505	11.2766	13.7034	9.66423	24.4408	14.4484	22.7091
916	L705 (m/z=730.509594; rt=5.19619)	17.7064	12.7053	15.4099	14.8457	14.0392	11.9148	14.3654	12.6801	11.5999	10.897	14.534	11.7347	14.8283	19.0451	12.3326	27.3573	26.9962	37.0081
917	L704 (m/z=730.493143; rt=5.19408)	19.5562	11.8845	16.7177	16.3967	15.896	12.7379	15.0343	13.1863	14.7685	11.7156	16.9391	13.5197	14.4802	20.0382	12.684	22.817	22.056	29.5721
918	L714 (m/z=780.528627; rt=5.22352)	3.0842	3.93988	3.91719	3.09372	4.26965	1.70861	5.21331	4.87754	4.6798	3.47435	7.761	6.0671	11.4358	13.7268	8.11994	73.6986	65.4251	75.5074
919	L711 (m/z=785.485186; rt=5.21984)	6.49683	5.54566	7.13287	5.87643	6.96308	3.94131	7.63082	7.19775	9.63078	6.39938	12.9176	12.7691	17.0491	21.4353	17.7461	56.5475	45.9406	48.7799
920	L709 (m/z=785.494856; rt=5.21652)	6.54971	5.54566	7.13287	5.45828	6.96308	3.94131	7.69293	7.19775	9.63078	6.10351	12.9176	12.7691	17.1878	21.4353	17.7461	57.0077	45.9406	48.7799
921	L713 (m/z=781.533134; rt=5.22334)	4.01844	3.98158	3.95145	4.0294	3.2538	1.57538	5.38939	5.26823	4.55286	3.37852	8.5348	6.72537	9.19793	13.1403	8.32916	73.9863	65.8213	74.8658
922	L712 (m/z=786.48602; rt=5.22187)	8.19598	5.4348	6.23981	6.18104	4.78652	3.79595	9.58721	7.75619	9.16319	7.4993	13.9344	13.4938	13.5902	21.6809	15.5966	54.9463	46.4071	51.7107
923	L706 (m/z=782.542057; rt=5.20913)	4.31184	3.94243	3.61916	4.68649	4.09326	2.04099	5.91742	5.03237	4.18498	5.47153	7.58069	5.92706	9.91105	16.422	7.69542	69.7017	62.9292	76.5324
924	L715 (m/z=786.509096; rt=5.22488)	7.58081	6.19138	7.9224	7.74252	5.22338	4.6874	7.72083	6.96179	9.55277	9.52292	12.8448	10.5206	12.393	18.227	14.9643	55.0399	50.5516	52.3525
925	L710 (m/z=785.531198; rt=5.21845)	0.781469	0.648136	3.45155	0.80423	1.21019	0.716236	1.48372	0.916198	4.77802	17.6488	22.4879	16.8194	21.844	23.5254	21.542	57.4378	51.2121	52.6928
926	L708 (m/z=787.490463; rt=5.21379)	9.35514	10.0273	7.62129	10.1276	9.07174	10.004	13.3298	11.0955	9.531	14.5292	14.4078	16.6934	16.3414	16.9405	16.8493	36.3168	38.4571	39.3009
927	L720 (m/z=790.548563; rt=5.23213)	20.3468	17.2459	17.5425	19.6873	16.0923	7.15792	14.0923	11.4841	9.71065	7.29221	13.3719	14.026	7.79671	17.5378	13.3727	30.7847	24.268	38.1901
928	L721 (m/z=790.565777; rt=5.23257)	19.1083	16.6003	16.0434	19.1275	15.5127	11.2677	13.4518	11.0543	9.15794	6.84834	12.8713	12.545	8.55146	17.5538	11.9607	32.9126	26.4076	39.0254
929	L707 (m/z=782.504885; rt=5.2137)	12.8698	8.49744	6.32545	8.4579	6.66513	3.93328	11.7262	7.82627	4.28849	6.37977	7.98133	5.7988	8.40608	14.603	8.09469	52.1602	54.4268	71.5593
930	L716 (m/z=795.517428; rt=5.22862)	17.8811	17.8028	21.9782	17.4557	17.2795	10.8632	15.9301	19.4025	15.1674	8.18808	8.25646	13.8832	13.3158	17.9107	7.93971	27.2292	19.3481	30.1682
931	L717 (m/z=795.542986; rt=5.22969)	15.333	18.8458	21.8494	16.7313	18.0523	10.2999	18.2214	17.4923	14.6448	7.55437	7.95976	12.7994	12.4932	17.6976	7.83494	29.6667	19.9522	32.5716
932	L719 (m/z=794.538157; rt=5.23147)	15.5155	19.4246	18.3895	16.0775	18.5711	12.2475	13.6543	15.9867	13.4023	5.84522	13.0722	9.65539	15.8974	12.6646	10.4215	33.01	20.2807	35.8838
933	L718 (m/z=794.508086; rt=5.23126)	16.3262	18.5073	17.868	14.3188	19.7721	13.69	13.2044	16.334	13.5294	5.85485	13.0274	10.2703	16.4497	13.2394	10.5579	33.846	19.1198	34.0843
934	L722 (m/z=398.271569; rt=5.24916)	13.2188	14.0019	17.1485	12.2444	10.751	8.7639	15.2899	16.7999	13.1772	9.58563	13.7907	12.4221	15.4255	16.8007	12.0912	34.2357	27.8558	36.3972
935	L733 (m/z=796.553455; rt=5.28739)	12.1391	16.0669	20.4036	11.3762	13.3581	10.0044	13.6711	12.2001	14.2157	6.00592	13.6642	12.125	15.0404	18.8863	11.0184	41.7672	25.8245	32.233
936	L734 (m/z=796.530453; rt=5.28753)	12.5034	16.2436	20.646	11.6325	13.5351	10.0443	13.7414	12.4263	14.3483	6.24618	13.9336	12.2758	15.2176	18.9353	11.0865	40.6589	24.9261	31.599
937	L745 (m/z=794.538256; rt=5.32381)	13.243	19.5173	23.6719	12.909	13.1108	10.3983	14.9878	14.5487	13.6071	6.41721	14.135	12.6454	14.5873	18.2017	11.0466	37.8557	20.4865	28.6307
938	L732 (m/z=797.558069; rt=5.28692)	11.5214	16.021	20.9976	11.9833	12.5515	10.9226	13.0924	12.0809	13.2242	6.49656	13.7608	13.4489	14.7288	18.5836	10.5217	42.1775	27.0022	30.885
939	L731 (m/z=797.531631; rt=5.28682)	11.588	16.1093	21.0392	12.6443	12.7542	11.2488	13.3463	12.275	13.4798	6.90276	14.102	13.6943	14.6583	18.5995	10.7974	40.8603	26.1599	29.7406
940	L748 (m/z=794.507988; rt=5.32418)	14.1661	19.8957	23.7953	12.8566	13.2496	10.9888	15.0344	14.7529	13.6342	7.25684	14.5215	12.8929	15.4948	18.1394	11.1026	35.1912	19.4409	27.5862
941	L746 (m/z=795.543445; rt=5.32396)	15.3853	19.5281	23.2242	13.0937	13.8274	10.4575	17.5395	13.6601	14.6871	6.03901	15.8816	13.4849	13.9938	18.3299	11.0075	33.9486	18.7729	27.1389
942	L728 (m/z=398.277468; rt=5.28564)	12.6807	16.339	20.2385	12.9024	12.5877	12.2474	16.1682	13.5249	13.8125	6.97804	13.6105	11.7294	16.608	18.4878	10.4179	34.6627	25.4501	31.5543
943	L747 (m/z=795.517665; rt=5.32408)	15.8269	19.5949	23.6052	13.4691	13.8112	10.5928	17.5097	13.7704	14.9458	6.34645	15.9857	13.5405	15.0122	18.4958	10.9776	31.8357	18.342	26.3381
944	L727 (m/z=798.566932; rt=5.28473)	12.5931	15.7872	20.1662	12.29	13.3006	10.5534	14.5675	11.8507	15.0728	9.83823	14.2218	13.6298	14.6248	18.1782	10.9078	36.0863	26.6615	29.6699
945	L725 (m/z=798.548404; rt=5.28208)	11.9357	16.4338	20.611	13.26	13.8454	10.7862	15.6223	12.336	15.4053	10.6147	14.8042	13.9304	15.779	18.9227	11.1483	32.7883	23.6579	28.1187
946	L723 (m/z=798.561422; rt=5.25054)	12.1062	13.7194	17.3358	13.4495	14.5908	9.6296	15.8455	12.298	13.5092	9.1146	13.779	13.8393	16.0045	17.6254	9.60598	33.4797	27.9874	36.08
947	L750 (m/z=397.267852; rt=5.32432)	18.4303	19.4878	23.4111	15.3656	14.445	10.198	16.1793	16.6075	12.3095	10.304	12.9789	13.5961	16.9444	16.6281	11.7183	22.7765	19.8526	28.767
948	L749 (m/z=397.274583; rt=5.32431)	18.1277	20.3251	22.1253	16.0023	12.3284	10.5552	15.7839	13.5705	12.2007	9.9094	13.7677	13.3975	16.2399	17.7753	12.0179	23.9368	22.233	29.7034
949	L724 (m/z=824.522726; rt=5.25319)	28.5773	32.4793	40.7146	20.4892	19.1254	12.9518	25.3469	17.7036	17.1548	7.23288	14.3277	12.3146	8.70784	10.9046	6.346	9.64587	5.45936	10.5182
950	L730 (m/z=826.518435; rt=5.28653)	25.9735	28.8768	39.8815	33.8879	23.0985	12.6097	16.6185	14.2281	17.8406	7.77145	12.792	11.289	8.3579	10.7159	6.44986	7.39078	10.2887	11.9294
951	L738 (m/z=826.519534; rt=5.29527)	31.1734	27.9489	38.1375	20.6523	22.3563	12.0583	19.9455	13.7709	17.0604	9.32728	12.381	10.7954	10.0311	10.3716	6.16782	8.87041	13.1714	15.7805
952	L726 (m/z=826.543911; rt=5.28457)	32.1524	26.0629	39.3002	22.4518	23.3868	11.2395	18.5455	12.7912	16.3735	7.37449	13.7597	9.34255	8.57611	9.36105	5.90668	10.8997	14.6383	17.8375
953	L735 (m/z=824.524013; rt=5.28827)	26.8666	28.0526	32.9356	21.2462	17.9554	12.3775	21.7099	14.2182	16.1205	6.42002	10.8426	10.1473	8.47633	9.15629	5.53288	15.281	19.775	22.8862
954	L729 (m/z=825.524196; rt=5.28591)	23.448	25.9517	31.9767	33.1881	21.2184	13.5022	19.6041	14.1037	17.6043	6.24932	10.852	10.8889	8.28456	10.0228	6.3308	9.22594	17.8513	19.6971
955	L737 (m/z=825.549221; rt=5.29179)	25.3396	27.6784	30.9849	21.3976	19.6593	12.5936	21.4293	12.5711	15.9111	6.61654	8.87884	9.73935	8.50314	8.85876	6.34544	16.7138	22.3535	24.4255
956	L736 (m/z=827.528337; rt=5.2902)	21.3204	22.5378	30.8992	25.3878	15.7524	19.9384	21.7716	14.0701	14.0994	9.71846	15.7981	11.7625	9.86621	15.1981	9.79659	11.9356	16.6434	13.5039
957	L762 (m/z=808.56174; rt=5.33113)	3.25801	5.01896	5.08781	3.93105	3.82229	2.52513	6.23074	4.78118	5.71409	3.51476	8.55367	7.65266	11.2342	15.2167	9.68747	71.8312	62.6072	69.3328
958	L760 (m/z=809.56496; rt=5.33041)	3.0616	4.71719	4.89754	4.36406	3.7692	2.5328	6.41439	4.76607	5.5437	3.45776	8.89313	7.48354	10.7784	15.2412	9.79053	71.9238	62.6132	69.7519
959	L761 (m/z=809.543519; rt=5.33075)	3.12474	4.82658	4.95992	4.33083	3.81992	2.62216	6.55454	4.95531	5.64755	4.03613	8.98172	7.58444	10.9014	15.3732	9.98518	71.0524	62.0433	69.2007
960	L764 (m/z=813.517583; rt=5.33304)	6.1656	8.47115	10.5006	7.5149	9.40603	7.67064	11.6532	10.4907	13.8476	7.46934	16.6799	18.3145	19.4332	23.2194	21.2627	47.7637	31.7328	28.4039
961	L765 (m/z=813.512556; rt=5.33335)	6.1656	8.47115	10.5006	7.5149	9.40603	7.67064	11.6532	10.4907	13.8476	7.46934	16.6799	18.3145	19.4332	23.2194	21.2627	47.7637	31.7328	28.4039
962	L766 (m/z=813.507899; rt=5.33343)	6.1656	8.47115	10.5006	7.5149	9.40603	7.67064	11.6532	10.4907	13.8476	7.46934	16.6799	18.3145	19.4332	23.2194	21.2627	47.7637	31.7328	28.4039
963	L763 (m/z=814.515083; rt=5.33139)	7.3977	9.61135	9.52847	8.05119	9.4114	7.05469	14.2725	11.9171	13.8895	7.81368	15.8575	19.0275	20.9574	22.3528	21.4713	41.5075	30.8499	29.0286
964	L752 (m/z=808.510759; rt=5.3291)	3.89892	4.86672	4.82183	4.5077	4.55309	2.49481	6.14221	4.82201	5.52826	4.27218	8.25094	7.43219	10.5226	14.9703	9.76803	70.6564	62.5369	69.9549
965	L744 (m/z=970.616092; rt=5.30917)	4.88134	5.2864	5.37393	5.72878	5.55178	2.9831	6.71192	6.15165	7.00934	4.45686	9.39484	8.72919	13.9164	16.5215	11.7293	64.3047	57.0938	64.1751
966	L758 (m/z=810.57049; rt=5.33026)	2.92582	5.11625	5.08418	4.20636	4.72224	2.46954	6.0739	5.63477	5.91364	4.08337	8.12623	7.04735	12.5853	14.3403	9.3976	70.1253	62.0602	70.0877
967	L754 (m/z=404.281494; rt=5.3301)	3.29321	5.48213	5.47372	3.98835	4.25771	2.74672	5.94609	5.17897	6.13183	8.81373	9.45679	8.59996	11.0695	15.5252	9.65451	66.8892	60.0992	67.3933
968	L755 (m/z=808.612885; rt=5.33015)	3.19505	5.372	5.77975	3.67705	4.0106	2.55893	6.09452	5.04982	6.00421	8.51246	9.35706	8.3188	11.2009	15.0929	9.55327	67.3201	61.1177	67.785
969	L759 (m/z=810.546235; rt=5.33032)	2.70277	5.02741	4.30585	4.30917	4.70038	2.53315	6.08541	5.81404	5.83924	4.07209	8.9039	7.10117	12.8933	14.3749	9.59377	69.9372	61.1794	70.6268
970	L770 (m/z=812.500817; rt=5.34444)	5.51073	9.97931	11.9479	5.83203	8.03523	8.4678	10.7897	8.18295	10.8122	5.35353	12.6926	12.3315	18.0477	19.4057	17.6975	54.4663	41.7042	38.7432
971	L743 (m/z=971.619662; rt=5.30886)	5.7639	5.06888	5.1196	5.35114	5.20025	3.26238	9.02602	6.25317	7.51752	6.13724	10.1541	8.52502	12.7193	17.1024	12.4861	61.0024	56.2212	63.0894
972	L742 (m/z=971.587271; rt=5.30886)	5.92987	5.13025	5.28829	5.08975	5.51929	3.31903	11.0348	6.36296	7.81302	6.37598	10.6613	8.75702	12.7925	17.3594	12.7728	58.7771	54.9668	62.0499
973	L741 (m/z=970.561212; rt=5.30877)	5.40404	5.17361	5.61204	5.89026	7.93782	3.25756	7.56023	6.45979	7.1699	6.63697	9.54975	10.2418	14.5348	16.6418	11.9018	59.9737	54.2372	61.8169
974	L771 (m/z=811.5569; rt=5.34466)	6.05102	6.80391	7.39975	4.77447	6.0035	3.43186	8.95473	8.55238	9.55722	12.5039	14.3043	12.128	15.0122	21.2902	16.2617	52.7037	43.0457	51.2214
975	L756 (m/z=611.470243; rt=5.3302)	4.74325	6.11394	6.25601	4.46385	4.5626	3.0514	6.95386	5.39137	5.98184	3.86584	9.59308	8.00492	10.5036	15.7718	10.3499	69.4696	58.5672	66.356
976	L757 (m/z=611.45907; rt=5.33025)	4.74242	6.17602	6.35497	4.36241	4.59685	3.2598	7.12438	5.55391	6.09256	3.85985	9.89001	8.11818	10.7896	16.0646	10.7012	69.1213	57.7186	65.4733
977	L739 (m/z=972.627106; rt=5.30048)	6.61065	7.53496	5.77341	6.31678	6.28987	4.52385	9.01865	7.53053	7.02003	7.12577	8.80193	8.67319	15.0706	16.1754	11.9703	55.8575	53.6674	62.0392
978	L740 (m/z=972.594867; rt=5.3013)	6.90384	7.11929	6.25875	6.25134	6.40577	4.66829	10.6675	9.15165	7.16756	7.50734	9.01547	8.98425	15.1126	16.6399	12.2939	53.5574	51.668	60.6272
979	L753 (m/z=404.271568; rt=5.32932)	4.58378	5.53234	5.38077	4.82788	4.37114	2.6517	5.90702	5.42418	5.95028	8.54598	9.42297	8.65125	11.153	15.0435	10.7045	64.9823	60.2059	66.6615
980	L751 (m/z=827.493973; rt=5.32892)	18.1357	16.8782	19.5167	21.5955	10.0144	12.5936	18.5195	10.5369	9.19672	9.73119	13.1108	13.1598	11.6868	15.6983	12.6255	20.3313	33.7615	32.9077
981	L768 (m/z=804.540482; rt=5.3383)	36.9718	29.7088	31.342	17.1161	13.9045	13.2472	19.3332	13.7215	18.2079	11.545	19.8319	16.449	9.03584	12.4378	11.7813	5.99811	10.3954	8.97254
982	L767 (m/z=804.534016; rt=5.33801)	37.5198	31.8541	31.5772	17.0317	13.5144	12.5963	19.6198	13.0808	18.3445	11.0436	18.1037	16.5724	8.69801	12.301	11.8697	6.08703	11.1461	9.03985
983	L769 (m/z=804.55613; rt=5.34019)	36.0857	28.6763	28.3681	16.7059	13.4213	11.9902	18.8699	13.2446	16.4802	10.1463	19.1427	14.8883	9.2684	12.0055	10.6635	8.92388	13.5096	17.6097
984	L772 (m/z=850.542122; rt=5.35003)	16.8748	17.442	20.128	16.6289	14.3108	14.8319	12.8934	14.5964	17.9143	15.5746	10.8274	10.8492	16.7921	26.307	14.4285	21.2361	16.5163	21.8482
985	L773 (m/z=806.545904; rt=5.36047)	4.11664	5.88095	5.02595	4.25613	3.87666	2.18702	6.83413	5.06037	5.812	4.27378	8.76589	6.89958	11.7548	15.0796	8.83773	68.7646	61.3365	71.2377
986	L777 (m/z=811.500492; rt=5.36597)	4.47518	8.02152	9.62077	6.33144	6.32624	4.68274	8.77456	9.05906	11.6675	12.7379	13.6823	14.6983	15.7528	20.5945	17.1497	51.9281	42.3164	42.1811
987	L774 (m/z=807.549961; rt=5.36093)	4.11854	6.04888	5.12572	5.61989	4.45247	2.58219	7.27743	4.79248	5.73087	4.58419	8.70221	7.01618	12.2784	14.0853	9.21364	66.1216	61.9187	70.3314
988	L776 (m/z=806.508493; rt=5.36257)	5.55468	6.60082	5.26224	4.88098	4.58836	2.48206	7.52251	5.76153	6.7341	4.70646	9.02266	7.17993	12.4338	15.0474	9.21839	64.9016	58.9793	69.1233
989	L775 (m/z=807.518998; rt=5.36222)	3.93657	6.85487	5.72776	5.65389	4.61657	2.73334	8.04227	5.40211	6.55134	4.10746	9.61719	7.79865	12.2819	15.0588	9.77694	65.9779	58.4505	67.412
990	L778 (m/z=409.272152; rt=5.39959)	15.6777	14.7357	19.1565	16.333	12.3787	14.043	21.0758	20.8924	17.6366	14.0308	19.3282	17.433	18.8958	18.1976	15.3352	13.9869	14.4673	16.3957
991	L779 (m/z=416.375947; rt=5.39964)	24.6859	23.9734	19.8832	20.5978	17.2327	30.1157	19.2253	17.1075	16.3243	13.1637	18.8721	13.4994	14.5216	17.3859	13.025	7.80574	5.42838	7.15243
992	L780 (m/z=416.369805; rt=5.39997)	24.261	25.0437	19.8054	21.73	17.3372	29.5029	19.6545	17.0009	16.6373	13.3249	18.8824	13.8476	14.1172	16.5694	13.477	6.91238	5.16641	6.7297
993	L784 (m/z=790.564333; rt=5.43042)	22.7857	23.1317	28.4595	18.2444	17.4609	13.3483	19.3803	15.6	17.3369	6.58964	17.1043	13.3094	14.3572	15.2603	7.59347	18.6428	11.4428	19.9525
994	L785 (m/z=790.547821; rt=5.43049)	22.818	23.4095	28.8826	18.2703	17.6706	13.5468	19.4079	15.7874	17.5947	6.59899	17.3097	13.5073	14.3775	15.4436	7.70638	18.5273	10.3792	18.7622
995	L788 (m/z=788.547131; rt=5.43688)	26.6481	23.1897	26.741	22.6232	17.7825	12.4182	17.9786	14.1888	16.6053	6.4959	13.2921	11.8339	9.79103	17.1704	7.95536	16.4631	14.3766	24.4462
996	L781 (m/z=791.571319; rt=5.42478)	21.7307	22.0015	28.5587	19.4126	18.3458	13.6398	20.2144	17	17.3654	7.83159	15.5977	13.5967	11.7056	15.5035	8.94962	19.1051	11.5515	17.8898
997	L782 (m/z=791.549627; rt=5.42587)	22.1652	22.0341	28.8597	19.5727	18.7977	13.9096	20.1424	17.0025	17.914	8.26115	16.0888	14.1768	11.3175	15.9006	9.08149	18.5411	10.1761	16.0583
998	L790 (m/z=789.551303; rt=5.43732)	26.2808	22.176	27.7906	24.8992	19.2945	14.4678	16.0675	15.3054	14.9584	8.5634	13.2631	11.612	10.2047	15.9735	7.73013	13.9845	13.9875	23.4412
999	L783 (m/z=792.543519; rt=5.4293)	21.6576	20.4876	21.083	18.784	19.0648	17.0052	16.8745	16.8177	18.5734	12.9237	16.9191	18.3574	13.0564	18.295	12.9397	16.7039	8.41589	12.0413
1000	L786 (m/z=792.5734; rt=5.43054)	20.4045	20.5478	26.1543	21.2758	17.2628	15.014	17.5497	16.4799	14.6517	10.8652	17.3655	12.5616	13.8681	17.5027	12.7821	16.0367	10.8414	18.8364
1001	L787 (m/z=395.282455; rt=5.43301)	21.3296	19.6084	23.1324	18.481	15.4664	13.8297	17.3454	15.4464	13.8864	10.7419	17.1163	14.8565	12.0702	15.476	12.2756	20.0319	16.8866	22.0195
1002	L789 (m/z=394.274074; rt=5.4369)	23.2334	18.2236	24.9877	20.5503	18.2	15.5469	18.055	17.5902	13.7979	10.8628	15.8249	13.7864	11.9996	14.8504	10.3138	15.2989	15.3109	21.5673
1003	L793 (m/z=622.447608; rt=5.48569)	29.662	29.8615	36.5703	30.4127	20.1558	16.6204	18.701	16.8047	16.4675	6.37752	14.1524	12.6655	7.68249	12.3754	7.08674	7.16423	6.65029	10.5895
1004	L801 (m/z=788.547006; rt=5.53665)	27.7119	26.3879	33.2231	24.9904	19.5117	14.4772	22.1155	17.7241	16.6451	7.10033	12.9781	11.403	9.46169	15.5622	8.54589	8.62023	7.83596	15.7058
1005	L792 (m/z=622.432026; rt=5.48551)	29.5225	29.9537	36.5161	30.4678	20.2697	16.8412	18.6356	16.6228	16.432	6.3507	14.2489	12.6188	7.9359	12.2418	7.02462	7.08753	6.66326	10.5673
1006	L791 (m/z=623.450422; rt=5.48526)	29.5934	30.3239	34.8653	29.6758	20.1769	17.4031	18.9962	14.892	18.3216	7.75124	16.4936	12.2864	7.11482	11.0619	7.21861	6.86849	7.05168	9.90506
1007	L800 (m/z=789.55097; rt=5.53585)	30.5547	26.0695	31.7866	27.4347	17.3371	14.5724	16.3527	15.7629	15.902	7.13319	13.7727	12.9922	9.06314	16.283	8.28973	9.46152	10.7749	16.4571
1008	L797 (m/z=568.430111; rt=5.51248)	7.44142	8.01514	5.35656	12.6775	8.95636	12.433	11.6897	11.203	9.06509	11.7237	12.0172	10.5335	14.1154	15.4736	10.7216	42.3523	44.3347	51.8902
1009	L798 (m/z=568.416283; rt=5.51254)	7.77381	7.77281	5.06526	12.702	8.78517	11.9077	11.3639	12.0778	9.24256	11.3088	13.2478	11.9664	15.4765	15.1163	10.8295	41.3749	43.0002	50.9886
1010	L795 (m/z=551.427179; rt=5.51048)	3.14994	4.96828	4.38893	4.53696	3.93666	2.5813	6.36354	5.2986	7.03294	9.51462	11.0336	11.098	13.4407	14.4265	12.5939	62.9943	60.3364	62.305
1011	L794 (m/z=551.414595; rt=5.51041)	3.3055	4.90986	4.2676	4.44166	4.023	2.57058	6.16228	5.26308	7.03148	9.44997	11.1419	11.1498	13.256	14.3135	12.5503	63.3846	60.3487	62.4303
1012	L796 (m/z=569.434411; rt=5.51201)	8.68169	7.18103	5.34769	10.3193	8.59789	9.18333	10.4554	11.2688	9.44245	9.70423	13.3644	11.9935	16.0485	15.0611	13.0405	44.7909	44.5267	50.9925
1013	L799 (m/z=779.545878; rt=5.52822)	13.1634	10.208	10.8537	17.1039	12.1719	10.8297	28.2492	18.1057	14.8705	10.4531	20.6536	18.4023	13.2983	20.9936	13.8365	17.732	17.8673	31.2073
1014	L802 (m/z=394.27397; rt=5.53707)	24.4687	18.2043	24.4055	22.6216	19.5136	16.0804	18.34	18.2401	15.7971	12.5383	15.1699	17.1017	12.0306	17.3213	11.9037	10.0007	11.5508	14.7116
1015	L803 (m/z=763.605779; rt=5.55204)	13.0302	21.3939	21.5462	17.867	18.2226	13.7226	16.4904	12.5141	14.2047	17.4729	13.141	14.8858	18.0177	21.4636	23.6035	17.1218	13.2648	12.0371
1016	L804 (m/z=832.555743; rt=5.55402)	17.7372	26.0189	31.0217	13.8503	18.2712	15.9958	22.4233	16.5568	14.7497	10.3515	12.342	12.4878	15.4796	14.6387	11.9356	20.1581	12.1724	13.8094
1017	L805 (m/z=832.527223; rt=5.55428)	19.4414	27.4731	29.9155	15.4363	18.5736	15.6707	19.7696	16.6962	17.9116	10.7752	14.4706	13.0263	17.2035	12.1334	9.54705	17.3741	10.6532	13.9289
1018	L806 (m/z=832.526938; rt=5.55439)	19.4414	27.4731	29.9155	15.4363	18.5736	15.6707	19.7696	16.6962	17.9116	10.7752	14.4706	13.0263	17.2035	12.1334	9.54705	17.3741	10.6532	13.9289
1019	L807 (m/z=816.57842; rt=5.56445)	19.7102	19.125	20.2709	16.0756	14.8703	13.8258	17.2431	21.2209	17.5284	12.0344	13.4543	14.2752	12.5924	19.1778	11.2466	22.3445	12.1518	22.8531
1020	L808 (m/z=816.578311; rt=5.56572)	19.7102	19.125	20.2709	16.0756	14.8703	13.8258	17.2431	21.2209	17.5284	12.0344	13.4543	14.2752	12.5924	19.1778	11.2466	22.3445	12.1518	22.8531
1021	L809 (m/z=817.581916; rt=5.56789)	18.7862	16.0228	20.204	16.7192	19.7724	13.4994	17.2813	18.9843	16.5383	15.3657	19.3739	14.2298	13.897	12.568	19.6924	17.9506	13.2786	15.8361
1022	L811 (m/z=844.537851; rt=5.57775)	7.59568	13.5102	10.3716	8.68227	8.14906	5.06226	11.5484	8.38838	9.19144	6.36877	14.8335	10.0272	14.6531	18.4205	10.1169	51.1518	36.6984	55.2306
1023	L810 (m/z=844.510247; rt=5.57713)	7.60965	13.7168	10.1083	7.68086	8.3043	5.32498	12.37	8.85061	9.11	6.299	14.8029	9.96554	14.8146	18.8634	11.4752	51.2258	35.462	54.0159
1024	L812 (m/z=844.523004; rt=5.63053)	12.2109	15.8375	9.32054	12.0554	9.32367	6.40357	14.3364	8.74568	11.0376	6.47121	11.4721	10.0292	12.2708	14.7695	7.44508	42.6553	39.8515	55.764
1025	L813 (m/z=783.566403; rt=5.63107)	9.8076	8.5535	5.81022	12.1178	9.4664	7.03072	12.9198	11.6889	10.4781	10.5253	14.3182	11.2099	12.0997	20.4258	10.6863	42.5299	35.5472	54.7848
1026	L814 (m/z=826.539343; rt=5.6412)	24.6088	28.5453	36.0229	30.4933	19.8569	14.4915	19.5544	11.6122	19.2193	7.5748	15.0357	13.9317	9.7664	15.0886	8.57146	8.00233	9.86138	7.76309
1027	L840 (m/z=948.630195; rt=5.70365)	5.11423	6.97943	6.85785	5.78989	6.20311	3.89217	9.13877	6.94552	7.40737	5.69952	10.6456	8.91731	13.8771	17.8776	11.5756	60.3805	51.3488	61.3497
1028	L836 (m/z=949.63381; rt=5.70335)	5.30699	6.77224	6.45456	6.10756	5.77199	4.10721	8.14666	7.27621	7.39852	6.37566	11.4275	9.45013	13.655	16.7741	12.5534	60.4081	51.9779	60.0361
1029	L832 (m/z=949.669696; rt=5.70309)	6.14033	6.74455	6.42929	7.26522	5.80777	4.56831	7.47833	7.13132	7.098	6.91181	11.2501	9.22361	12.9149	16.3705	12.2351	59.2894	52.6957	60.4457
1030	L854 (m/z=946.620335; rt=5.71383)	7.18941	8.38583	9.08632	8.20219	6.84243	4.80152	9.21301	7.9994	9.11372	7.79027	11.9852	9.7742	13.9523	18.7096	12.4658	53.6528	46.0776	54.7584
1031	L831 (m/z=948.685324; rt=5.70067)	7.21231	6.41994	6.31877	4.92191	5.99817	4.12679	7.97868	6.68169	7.0631	6.34155	10.1711	8.36195	13.37	17.7383	10.705	60.1755	52.9908	63.4244
1032	L855 (m/z=946.587557; rt=5.71392)	7.37068	8.58068	9.17232	8.56361	7.02238	5.67339	9.29454	8.34116	9.18128	8.01944	12.1591	10.0251	14.2902	18.8936	12.8464	52.4615	45.003	53.1015
1033	L818 (m/z=856.528616; rt=5.66113)	6.4109	5.43131	9.71825	5.74663	4.93238	5.67397	11.9847	7.89631	5.31189	8.308	13.6341	13.9337	21.2788	32.7966	17.4201	46.2709	35.3093	47.9421
1034	L841 (m/z=948.569298; rt=5.70383)	6.23639	6.55188	6.76004	7.6957	7.24173	5.19453	9.51101	8.72194	7.47177	7.10147	11.0884	9.08081	13.4343	17.5556	12.322	56.0211	48.8404	59.1708
1035	L853 (m/z=947.619145; rt=5.71381)	8.5944	8.66076	8.64211	7.85307	8.00494	5.26758	12.5827	9.15879	9.48855	6.85793	12.4229	9.94185	14.7995	18.411	12.515	49.3124	43.3416	54.1449
1036	L817 (m/z=856.495816; rt=5.66095)	6.33011	5.3402	9.86031	6.20674	5.12929	6.17976	11.8426	7.89987	5.38746	8.74093	13.9772	14.3012	21.8346	33.1248	18.0747	45.0451	34.5287	46.1966
1037	L834 (m/z=950.63684; rt=5.70318)	6.88537	8.38801	8.7503	6.51622	7.36024	4.29081	10.8001	8.95554	8.88798	7.16182	11.411	11.5158	13.269	16.6529	11.7522	55.3675	47.2323	54.8029
1038	L835 (m/z=950.618069; rt=5.70319)	6.88703	8.38801	8.77065	6.51778	7.36024	4.30079	10.8027	8.95554	8.90865	7.13949	11.411	11.5426	13.2722	16.6529	11.7795	55.3808	47.2323	54.6978
1039	L816 (m/z=857.534247; rt=5.66078)	7.5527	4.92535	11.0115	5.7863	5.03055	6.74833	10.9713	7.73892	5.81474	8.13736	12.596	13.8912	22.7535	34.7234	17.101	44.7988	34.9858	45.4333
1040	L815 (m/z=857.508789; rt=5.66057)	7.67284	4.76615	11.1528	5.78114	5.06892	6.9248	11.1548	7.81155	5.72056	8.1582	12.5631	13.9346	23.1166	35.123	17.579	44.1165	34.6674	44.6883
1041	L819 (m/z=784.560889; rt=5.67003)	6.8412	6.78171	5.39924	6.255	5.88023	2.55918	9.7245	7.45642	5.34996	6.70271	10.323	8.11843	13.5439	16.4165	8.26255	56.9327	53.1421	70.3106
1042	L838 (m/z=474.316668; rt=5.70357)	6.63426	6.44358	7.5041	5.99937	7.40062	5.21312	9.47699	8.17606	7.72727	6.60102	12.1416	10.7772	15.6983	16.7657	12.756	55.59	49.0724	56.0223
1043	L856 (m/z=947.570531; rt=5.7143)	8.53001	8.8388	9.3061	8.16925	8.44351	5.54422	11.6411	8.51896	10.3418	9.81395	14.7835	12.0383	17.0461	18.9958	14.6938	44.7996	40.4195	48.0758
1044	L820 (m/z=790.565291; rt=5.67597)	29.683	24.347	27.23	14.2423	16.8012	13.0762	11.9407	19.5099	15.5831	10.8248	14.5072	14.4734	18.9948	12.4459	9.28258	14.3144	12.3887	20.3547
1045	L821 (m/z=398.277662; rt=5.69143)	16.7965	18.4872	23.6373	20.9597	16.0709	13.2657	17.5137	15.7796	14.7575	10.6713	13.2189	12.1792	15.0505	16.5659	11.6113	19.0083	19.8774	24.5491
1046	L867 (m/z=772.551749; rt=5.71646)	16.081	17.393	21.4773	14.521	15.2795	12.3039	16.5064	14.1017	16.7133	7.19616	15.4631	13.601	13.2909	17.3404	10.181	32.4046	20.4223	25.7235
1047	L864 (m/z=773.555596; rt=5.71621)	16.4565	17.587	22.0987	14.3075	15.5841	12.6147	14.9896	14.4314	16.5783	7.01829	15.1709	12.579	14.4636	16.6349	9.65182	32.7645	20.5917	26.4775
1048	L845 (m/z=798.568785; rt=5.71052)	11.4927	15.4419	19.7326	12.3568	12.5045	9.64884	14.2488	13.0357	13.2144	6.64901	14.5433	11.4273	12.9189	16.5384	9.47213	42.3338	27.9362	36.5047
1049	L844 (m/z=798.548924; rt=5.71036)	11.5629	15.4916	19.9056	12.5468	12.6091	9.77779	14.3775	13.2178	13.258	6.86583	14.7037	11.6542	13.0179	16.6194	9.63614	41.6291	27.3584	35.7682
1050	L825 (m/z=796.555315; rt=5.69251)	16.7626	18.9489	25.6092	19.9227	14.4972	11.0542	16.2515	14.3549	14.1081	6.62137	13.5884	12.355	12.5167	17.105	9.15901	27.9251	21.5056	27.7144
1051	L847 (m/z=799.57596; rt=5.71132)	13.5003	14.6209	19.2479	11.1005	12.7664	9.16702	13.8705	12.8625	13.4919	6.46579	15.3465	11.5562	12.9269	17.1736	9.43366	42.136	27.2302	37.1033
1052	L846 (m/z=799.553841; rt=5.71124)	13.5408	14.7813	19.4017	11.1517	12.7222	9.41234	14.0759	12.8465	13.6685	6.49553	15.4708	11.7263	13.4806	17.3145	9.61918	41.2555	26.8647	36.172
1053	L823 (m/z=796.530808; rt=5.69237)	16.9467	19.1942	25.8956	20.2745	14.6135	11.2733	16.0366	14.3819	14.4229	6.8405	13.6433	12.4812	12.8007	17.4463	9.39793	27.101	20.7209	26.5291
1054	L865 (m/z=773.514015; rt=5.71634)	15.761	18.2004	22.8892	14.539	15.2771	13.2198	14.4467	14.3999	16.1904	8.99759	16.0866	13.5339	16.3498	16.3335	9.38485	29.906	19.7027	24.7819
1055	L866 (m/z=386.275389; rt=5.71643)	15.3268	17.6606	20.6337	16.7036	14.9794	12.2081	15.1299	14.1408	16.5224	7.83523	15.8736	13.8445	14.799	17.076	11.4505	30.2054	20.2696	25.3407
1056	L861 (m/z=774.558863; rt=5.71565)	16.1708	17.5274	23.113	13.8328	14.4514	12.1677	15.8309	14.227	16.4367	9.04722	15.5249	12.156	14.1937	17.4446	9.95433	30.9246	20.8247	26.1723
1057	L862 (m/z=774.558077; rt=5.71566)	16.1708	17.5274	23.113	13.8328	14.4514	12.1677	15.8309	14.227	16.4367	9.04722	15.5249	12.156	14.1937	17.4446	9.95433	30.9246	20.8247	26.1723
1058	L868 (m/z=386.281583; rt=5.71648)	14.8724	17.4094	20.6863	16.4914	14.7723	11.922	14.9971	13.6251	16.4273	7.7292	16.0366	13.6644	15.0525	17.3055	11.2323	30.8575	20.8512	26.0676
1059	L824 (m/z=797.558037; rt=5.69244)	17.7263	18.8593	24.4106	18.5587	15.2549	11.2931	16.6881	14.088	14.4319	6.90561	17.3698	14.414	10.9662	15.904	9.19687	29.1551	18.524	26.2535
1060	L822 (m/z=797.531906; rt=5.69226)	17.885	18.6138	24.4659	18.781	15.8497	11.1573	16.3399	14.5025	14.9858	6.91183	17.3654	14.6989	11.0448	15.7885	9.18994	29.0374	17.88	25.5021
1061	L879 (m/z=773.60994; rt=5.72455)	16.9387	17.4187	19.3165	11.8944	14.9732	10.8058	11.801	13.6331	16.286	9.36678	14.2349	10.6144	10.9021	16.682	9.40367	39.097	23.0581	33.5735
1062	L863 (m/z=386.778878; rt=5.71578)	16.0002	17.5689	19.9038	13.7057	15.2086	12.4632	14.683	14.478	18.3134	9.82919	16.3914	14.197	13.6067	16.6478	10.9156	32.1752	19.7052	24.207
1063	L842 (m/z=800.57578; rt=5.70818)	16.6005	15.1964	18.2642	15.3293	13.0289	8.74435	14.9008	12.8791	12.7403	7.62132	15.7395	12.0381	11.3888	17.9407	8.69488	34.1594	25.2154	39.5183
1064	L859 (m/z=257.521284; rt=5.71476)	16.0886	17.6003	21.113	14.5096	15.6039	12.12	16.007	13.8199	16.3261	8.88444	16.1213	13.3988	11.9745	16.9813	10.3799	32.5358	19.8733	26.6623
1065	L849 (m/z=399.282495; rt=5.71177)	15.6404	15.2616	19.8832	14.8401	12.9781	9.98818	13.5371	12.7912	12.9613	7.89022	14.4906	11.7055	12.0473	16.8133	9.78168	36.0448	27.6653	35.6802
1066	L848 (m/z=399.28909; rt=5.71169)	16.1427	15.4229	19.8832	11.9967	12.1822	9.98818	12.8309	12.9264	12.9613	7.97831	14.6437	11.7055	13.8489	16.8671	9.78168	37.2025	27.9577	35.6802
1067	L860 (m/z=386.771384; rt=5.7148)	17.039	17.2849	22.3884	14.1721	14.9667	12.2174	15.8631	15.0042	17.292	9.05753	17.1321	13.2783	12.4516	16.8778	10.362	31.4167	18.7343	24.4619
1068	L826 (m/z=416.369798; rt=5.69493)	26.9536	24.3964	20.0398	19.599	21.8845	19.2635	19.4304	21.9636	21.248	15.3263	9.93143	15.0506	10.4314	13.5155	15.8493	8.25941	8.30858	8.54879
1069	L829 (m/z=416.376182; rt=5.69754)	26.8307	24.6005	21.3153	20.1803	22.3355	17.9701	18.8679	21.8407	20.7039	15.6212	9.55076	15.3385	10.0949	13.3672	15.7436	8.40506	8.30537	8.9287
1070	L827 (m/z=790.526894; rt=5.69689)	16.2186	20.7266	24.1892	11.1417	14.0065	11.7311	6.72533	15.4099	15.2728	8.18514	12.4522	14.1461	16.8297	14.9698	12.1646	40.8995	22.435	22.4963
1071	L874 (m/z=770.538266; rt=5.72204)	19.251	20.9464	26.3674	17.4608	15.514	13.1083	16.7907	15.269	16.9176	7.67478	15.5988	12.3823	11.7563	15.8738	9.23721	27.0663	16.7981	21.9872
1072	L875 (m/z=770.511522; rt=5.72213)	19.4306	21.0762	26.7811	17.8774	15.6481	13.4473	16.9266	15.3656	17.02	7.80092	15.6598	12.49	11.9261	15.9753	9.39861	26.0383	16.2751	20.8629
1073	L877 (m/z=771.542687; rt=5.72224)	18.5801	21.4004	27.2242	18.4122	16.2384	11.9337	17.9615	14.8432	16.976	8.54698	15.7772	13.1036	11.7363	15.4683	9.16876	24.7629	16.2725	21.5937
1074	L878 (m/z=771.519222; rt=5.7223)	18.2803	21.3796	27.1468	19.0309	16.3641	12.153	17.8933	14.9779	17.0471	8.80447	15.8981	13.3919	11.6464	15.4665	9.25251	24.3446	15.9138	21.0088
1075	L837 (m/z=814.564099; rt=5.70351)	15.5992	20.995	21.6338	15.6385	15.3846	17.0166	16.81	15.0921	17.2272	12.1591	17.4478	12.4795	11.135	14.4551	11.795	28.6583	16.6254	19.8479
1076	L872 (m/z=814.548387; rt=5.72185)	13.9509	20.1868	20.954	14.9843	14.7924	16.4818	16.1068	14.5111	16.6859	11.6505	16.7761	12.0874	11.8996	13.8986	11.4243	31.408	19.835	22.3665
1077	L873 (m/z=385.272385; rt=5.722)	18.9429	18.7611	25.7509	18.0671	16.3434	14.6759	17.4079	15.8708	16.9384	9.75473	16.6694	12.0167	11.4515	16.6544	10.6819	24.3759	15.7009	19.9362
1078	L876 (m/z=385.266793; rt=5.7222)	18.9287	18.7611	25.4687	18.0535	16.3434	14.515	17.3949	15.8708	16.7527	9.82232	16.6694	12.9812	11.4429	16.6544	10.5648	24.3576	15.7009	19.7176
1079	L869 (m/z=815.54897; rt=5.71649)	19.1848	21.6907	24.0346	16.4315	17.5696	17.2179	14.1779	12.5877	15.9504	9.99239	17.2308	9.6055	13.9995	12.714	9.0114	26.2138	18.2073	24.1802
1080	L828 (m/z=815.576556; rt=5.69693)	14.8983	23.2137	25.1028	16.5875	18.8032	17.9832	22.6168	13.4715	16.6593	11.8676	18.4406	11.1483	15.6729	13.6068	10.3279	18.3569	12.4642	18.7786
1081	L880 (m/z=772.615273; rt=5.73264)	19.7123	17.1553	15.2554	9.00178	13.8425	8.69945	10.123	12.5074	12.921	7.91453	13.6053	9.90328	9.46194	16.2635	7.93506	43.7865	26.6259	45.2858
1082	L830 (m/z=816.644151; rt=5.70063)	22.5336	16.2905	14.3217	10.446	9.92895	7.60796	9.63296	12.6761	9.03349	0.286727	5.6899	3.90932	7.92926	13.8962	6.97063	49.1714	41.5182	58.1569
1083	L839 (m/z=953.585726; rt=5.70359)	9.02054	10.4899	11.9111	10.7014	12.2757	10.015	16.0339	12.6545	17.0561	12.3475	18.8282	19.4533	23.145	20.4574	20.1799	28.7516	25.2943	21.3846
1084	L833 (m/z=953.635954; rt=5.70317)	0.796558	0.777994	4.06585	7.69371	12.198	11.7267	18.3912	13.1875	15.0087	11.3903	16.6922	19.0769	28.8224	26.6842	22.111	32.9058	30.4601	28.0109
1085	L843 (m/z=800.550725; rt=5.7092)	15.2294	16.1643	19.064	12.7256	14.055	9.00033	19.6199	12.2428	13.5373	8.81667	15.944	12.4772	13.9329	18.3332	10.9182	29.6755	23.2607	35.0029
1086	L850 (m/z=388.34341; rt=5.71303)	12.4989	17.7861	15.2587	17.6638	17.5082	11.1219	15.3574	15.2521	23.3388	12.4734	17.6693	17.4353	22.5928	17.8364	21.5083	19.4137	13.9479	11.337
1087	L852 (m/z=388.335179; rt=5.7135)	12.393	17.7728	14.8669	18.7319	18.1086	10.5412	15.8165	15.1026	23.2781	12.2861	18.5361	17.7676	23.6789	18.7501	22.2637	17.0937	11.7298	11.2824
1088	L851 (m/z=389.34674; rt=5.71319)	12.6478	16.845	13.4641	17.1105	23.066	11.3579	16.1017	14.76	23.831	13.1974	17.6205	17.9293	23.9675	14.1648	20.632	16.9751	13.5437	12.7857
1089	L857 (m/z=371.317694; rt=5.71444)	12.9814	17.5973	15.9311	13.847	21.7609	12.1182	16.1028	14.0936	18.6331	12.6573	16.8879	20.0519	28.6585	15.6416	17.233	15.753	14.0187	16.0327
1090	L858 (m/z=371.312064; rt=5.71453)	13.1452	18.2435	16.175	14.044	21.7428	12.4687	17.0611	14.4231	19.0804	12.9725	16.4298	20.4571	28.5646	15.9127	16.8293	14.2126	13.248	14.9895
1091	L870 (m/z=393.299471; rt=5.71804)	13.4941	20.9031	13.2124	16.5619	18.0206	18.9704	17.4249	19.6168	16.5088	17.1084	14.007	18.1128	23.7551	16.4333	22.1567	11.6555	11.0191	11.039
1092	L871 (m/z=393.29258; rt=5.71864)	12.9788	20.8218	13.1347	16.6997	18.3306	18.4049	17.4903	18.8987	15.7543	16.1824	13.0557	18.3229	24.2482	16.8048	21.8514	12.4006	12.0885	12.5317
1093	L881 (m/z=789.5178; rt=5.73359)	11.9587	19.5302	21.1637	18.1371	14.4923	20.0377	20.0495	12.2303	10.0978	7.97543	11.2233	11.0376	12.7417	19.6464	11.9857	29.1376	22.8776	25.6777
1094	L882 (m/z=789.531233; rt=5.74776)	12.866	22.5688	24.1612	20.9324	16.0168	23.8388	17.7632	14.1957	12.4946	9.48867	13.2875	12.1179	13.1348	15.6764	7.36929	25.8149	18.2547	20.0182
1095	L884 (m/z=788.550771; rt=5.75677)	19.3079	23.9007	28.4354	25.512	16.7099	21.9795	15.3665	17.0372	16.9544	16.8968	16.3251	11.0315	10.3565	16.0501	6.18995	12.5604	9.97697	15.4092
1096	L883 (m/z=788.524109; rt=5.75341)	19.7364	23.3727	28.1782	23.751	16.765	22.0009	13.8095	17.094	17.053	15.9086	16.4223	11.1854	8.91875	15.1635	6.18106	17.8758	11.1825	15.4014
1097	L885 (m/z=789.553753; rt=5.75745)	13.5573	24.9925	24.9019	22.1496	17.8534	26.0601	18.6251	16.2953	14.598	11.2156	14.6185	12.5585	12.4976	10.384	7.70079	21.9549	15.8563	14.1808
1098	L886 (m/z=808.560304; rt=5.83375)	13.124	11.0922	10.1651	10.6212	6.5714	4.02869	11.6778	5.49432	5.87797	5.33664	8.83361	5.90631	10.2924	14.4092	7.70724	48.948	53.5993	66.3147
1099	L887 (m/z=809.562651; rt=5.83397)	13.8109	9.94455	9.70243	10.1007	6.98756	3.88186	10.4706	7.4509	5.53623	6.32438	10.7952	6.28403	11.3312	14.4251	8.34677	47.9622	50.3967	66.2487
1100	L888 (m/z=771.542349; rt=5.83632)	16.9672	20.5634	22.3938	16.1448	10.7611	12.6589	9.65472	16.4064	14.3264	14.996	10.1558	12.5371	13.3561	19.7995	11.9313	28.8812	22.3137	26.1526
1101	L890 (m/z=771.519683; rt=5.83653)	20.0017	19.8961	22.3284	16.7954	11.7191	12.4888	9.94828	16.3061	13.7308	14.0004	9.59614	13.7038	11.6664	20.1629	12.2247	27.5878	22.3196	25.5236
1102	L889 (m/z=770.537517; rt=5.83652)	17.441	21.1188	25.6169	16.5238	13.4387	10.6632	18.5758	16.036	15.0756	6.72504	14.025	12.0731	11.2634	14.1994	9.08886	29.471	21.1822	27.4823
1103	L891 (m/z=770.512297; rt=5.83664)	17.8665	20.0374	26.0565	16.641	13.0559	10.7567	19.3109	14.7265	14.8505	5.88608	12.5349	12.4643	12.2776	20.3614	9.75864	28.0179	19.2839	26.1133
1104	L893 (m/z=797.557545; rt=5.87058)	16.2596	19.1593	21.7942	17.6936	12.6638	10.9648	17.166	14.1168	19.131	10.222	15.1596	14.773	14.328	22.1739	8.43973	24.3309	16.7266	24.8972
1105	L892 (m/z=797.532109; rt=5.86987)	17.2333	18.8896	22.8258	17.947	12.1788	11.526	16.5468	15.7109	19.269	9.69595	15.1777	14.2885	14.3435	22.2315	8.61664	24.2335	15.8116	23.4741
1106	L895 (m/z=796.554231; rt=5.8725)	14.7089	21.2066	20.7685	17.8598	13.929	11.0803	15.5857	12.1616	17.5128	8.95251	14.58	16.1779	17.5794	20.6876	10.1398	25.3138	17.4351	24.3206
1107	L894 (m/z=796.530466; rt=5.87101)	14.9371	20.5546	21.0723	17.8172	13.7007	11.018	15.4013	12.3159	17.8478	9.14336	15.8033	16.0565	17.4516	20.5758	10.5388	25.2495	17.0497	23.4666
1108	L896 (m/z=808.527046; rt=5.87788)	17.5144	15.9238	14.6344	14.1743	9.4338	5.80001	11.624	7.08713	5.95872	7.07863	6.77711	4.84593	8.03926	12.893	7.26653	41.5694	47.8852	61.4945
1109	L905 (m/z=926.588264; rt=5.93361)	4.13703	6.34984	6.81246	4.78856	4.7928	3.19441	8.41367	6.48678	7.46203	5.37693	11.5626	9.86902	14.9147	19.77	13.1585	62.3691	51.038	59.5036
1110	L901 (m/z=927.592149; rt=5.93351)	4.39212	6.35227	6.97244	4.76478	4.85874	3.4063	8.14355	6.44124	7.49464	5.43578	11.4707	9.92379	14.9305	19.8456	13.1721	62.3333	51.0314	59.0307
1111	L904 (m/z=928.596437; rt=5.93358)	4.13757	6.5017	6.42493	4.85202	5.06525	3.37616	8.01407	6.32378	7.87436	5.05244	11.5406	10.1859	14.917	20.3814	13.4803	63.0269	50.1873	58.6583
1112	L903 (m/z=927.530673; rt=5.93355)	4.37233	6.61368	7.23706	5.10592	5.18192	3.48006	8.48331	6.66075	8.04823	5.71501	11.8705	10.4457	15.4135	19.9653	13.5814	60.91	49.7079	57.2075
1113	L906 (m/z=463.295664; rt=5.93361)	3.83455	6.36513	6.88611	4.64657	4.69397	3.12233	8.27772	6.45174	7.57581	5.11958	11.7149	10.247	15.4732	20.5315	13.6011	62.6484	50.2428	58.5676
1114	L908 (m/z=928.554717; rt=5.93364)	4.38367	6.74511	6.85234	5.16908	5.41845	3.55172	8.59418	6.73179	8.41526	5.30621	12.301	10.8406	15.4632	20.801	14.1604	61.0837	48.0027	56.1797
1115	L897 (m/z=700.45698; rt=5.90227)	6.41232	5.71476	5.91057	5.95901	5.269	3.48083	9.96547	6.62673	7.40724	6.00023	11.3701	9.34433	15.3965	22.0355	12.3564	56.2664	48.9839	61.5007
1116	L898 (m/z=700.442435; rt=5.90241)	6.44477	5.9364	6.20239	6.16737	5.22544	3.545	9.80906	6.60582	7.4671	6.12505	11.2358	9.62354	15.484	22.4875	12.5119	55.9698	48.509	60.65
1117	L900 (m/z=463.800668; rt=5.93348)	4.27489	6.40474	7.23398	4.57084	4.82677	3.45927	7.84434	6.25228	7.78075	5.45253	11.7597	10.297	15.1295	20.8054	14.0618	62.7279	49.9511	57.1671
1118	L902 (m/z=463.79268; rt=5.93354)	4.27489	6.40474	7.23398	4.57084	4.82677	3.45927	7.84434	6.25228	7.78075	5.45253	11.7597	10.297	15.1295	20.8054	14.0618	62.7279	49.9511	57.1671
1119	L907 (m/z=463.280414; rt=5.93363)	3.78229	6.7333	7.36066	4.87064	4.89336	3.46496	8.98411	6.84269	8.27767	5.5812	12.0777	11.2011	15.7041	20.6044	14.7671	61.0776	48.8485	54.9286
1120	L909 (m/z=927.683925; rt=5.93366)	1.66014	2.41367	2.39575	1.85027	1.82456	1.24129	3.0738	2.4674	2.68865	2.09819	4.09054	5.76947	24.3819	26.902	17.7581	66.9357	62.3018	70.1468
1121	L913 (m/z=750.512718; rt=5.93759)	9.81729	14.3447	16.5923	8.08038	9.00884	6.61875	10.9922	9.92208	10.712	6.41242	13.9496	11.36	14.4131	18.5418	10.7389	50.2846	34.233	43.9781
1122	L914 (m/z=750.492831; rt=5.93789)	9.80572	14.2798	17.2885	7.61583	9.04781	6.84393	11.3056	10.1413	11.0136	6.49956	14.0426	11.6198	14.8478	18.6386	10.8753	49.9255	33.8499	42.3589
1123	L911 (m/z=931.536031; rt=5.93432)	8.47899	12.3839	14.4156	9.69344	11.1663	9.44593	14.4724	13.936	17.1974	11.6778	18.3282	19.9746	23.8908	23.0181	21.837	31.7865	21.1675	17.1294
1124	L910 (m/z=931.563788; rt=5.93428)	8.42416	12.3161	14.2988	9.50106	11.0759	9.23316	14.4129	13.6574	17.1247	11.2552	18.2234	19.9175	23.7141	23.0875	21.8815	32.6925	21.6398	17.5443
1125	L912 (m/z=932.547399; rt=5.93438)	9.65572	14.0503	14.5838	9.46045	11.2824	9.98063	15.4839	13.8579	16.3933	10.2729	19.088	19.4947	21.9031	21.8882	21.9796	33.224	19.8332	17.5679
1126	L899 (m/z=932.607263; rt=5.93299)	10.8221	12.2051	14.0999	8.61444	10.3229	10.3309	16.897	12.4425	14.9269	15.2443	18.6411	18.5727	18.9411	22.1089	22.115	29.4812	24.2794	19.9545
1127	L915 (m/z=834.545491; rt=5.9447)	18.9159	28.1175	34.154	17.7933	14.2405	12.2166	19.2631	13.5652	16.6891	10.3528	14.339	13.5076	18.191	16.7438	11.6359	15.4839	12.9942	11.7968
1128	L917 (m/z=463.295319; rt=5.95916)	4.25692	6.58387	7.72992	5.62875	4.981	2.69752	7.30742	5.85712	8.66813	3.73386	9.37842	8.33283	12.1486	19.6736	13.0558	66.9244	53.526	59.5158
1129	L916 (m/z=463.797187; rt=5.9589)	4.44969	6.17303	7.53124	5.16818	5.23818	3.01253	7.58219	5.72371	8.58029	3.90636	9.76945	8.36266	12.2392	19.9343	12.8936	66.6544	53.1614	59.6196
1130	L919 (m/z=931.543653; rt=5.96081)	8.93988	12.5603	15.3501	10.6147	12.4909	8.56427	13.243	12.5608	16.2598	8.16188	15.7195	17.5114	20.2896	23.2561	21.6225	38.751	23.4125	20.6919
1131	L918 (m/z=931.597043; rt=5.95953)	8.79237	11.8772	14.2818	9.38139	11.2935	8.53001	12.9886	11.993	15.8887	7.64041	15.0151	16.2705	19.9751	23.5614	19.7833	41.2221	26.2598	25.2458
1132	L935 (m/z=684.462244; rt=6.12661)	6.7024	7.93747	7.52506	7.26301	6.02115	4.01042	9.65128	7.29658	8.32803	5.78098	11.7589	9.7946	13.4964	15.2162	11.7848	57.1059	51.7697	58.5571
1133	L930 (m/z=667.436245; rt=6.12464)	7.55473	8.90441	8.71303	8.27181	6.65218	4.61515	10.4058	7.44923	9.14099	6.07139	12.7673	9.42946	13.4821	14.7553	12.6359	54.2142	49.4716	55.4655
1134	L932 (m/z=684.439325; rt=6.12639)	6.73194	8.07332	7.82382	7.34021	6.43394	4.18763	10.1064	7.39048	8.75315	5.85859	12.2864	10.2872	13.7373	14.4272	12.3215	56.2255	51.3886	56.6267
1135	L927 (m/z=667.418257; rt=6.12452)	7.49546	9.0034	8.71654	8.36685	6.668	4.73311	10.5077	7.55273	9.24012	6.15571	12.8739	9.56521	13.4747	14.8175	12.717	53.9996	49.0844	55.028
1136	L923 (m/z=950.647852; rt=6.10886)	5.58057	7.17081	6.64487	6.21159	5.8152	4.19907	8.64061	6.51045	7.59107	6.26882	10.0677	9.16497	14.7457	19.4171	12.4204	58.5527	51.0187	59.9796
1137	L933 (m/z=685.465203; rt=6.12643)	6.22254	7.57027	7.7771	8.25227	6.10224	3.85179	9.27029	7.19851	8.26742	5.69798	12.7583	9.1733	13.3538	14.9764	12.2557	57.2032	51.3943	58.6747
1138	L924 (m/z=951.627282; rt=6.10912)	6.47401	7.44401	8.68374	8.23647	6.95239	5.60966	9.64507	7.89956	8.88499	6.43983	12.0375	8.52288	13.7261	16.9151	12.3244	55.4785	48.7515	55.9743
1139	L925 (m/z=951.651156; rt=6.10956)	6.26425	7.36499	8.57458	7.97789	6.75652	5.44679	9.60594	7.6719	8.58335	6.29608	11.754	8.13019	13.4778	16.8041	12.0043	56.378	49.6485	57.2608
1140	L922 (m/z=950.602083; rt=6.10775)	5.96761	7.32226	6.89935	6.58337	5.98201	5.83186	9.04862	6.73479	7.82371	7.90204	10.5033	9.51354	14.7506	20.2364	12.9959	55.7478	49.2212	56.9356
1141	L928 (m/z=668.439865; rt=6.12454)	7.21003	8.91298	8.77123	8.36478	6.59289	4.57647	10.6222	6.63489	9.76019	6.04033	11.5722	9.43831	14.5663	15.8779	11.5002	53.1964	50.4091	55.9536
1142	L929 (m/z=668.423591; rt=6.12457)	7.24488	9.03406	8.92187	8.44927	6.60303	4.57888	10.6718	6.7457	9.97535	5.93385	11.6262	9.59126	14.6723	15.9765	11.7194	53.028	50.0145	55.2132
1143	L940 (m/z=389.135681; rt=6.12859)	7.93636	9.5039	8.95404	8.58103	7.09262	4.21133	10.2565	7.72589	9.36821	6.53014	11.5987	9.94752	14.5005	14.6921	11.7473	52.1955	49.3868	55.7716
1144	L931 (m/z=685.440282; rt=6.12608)	6.10476	7.07976	8.10556	8.24277	6.20058	3.78068	9.39195	7.24711	8.30931	5.7322	13.74	9.55041	13.5774	15.1672	12.837	56.9509	50.5653	57.417
1145	L941 (m/z=389.12999; rt=6.12866)	7.94159	9.64764	8.98226	8.95958	7.13668	4.28655	10.3868	7.59623	9.538	6.51816	11.9295	10.2402	14.5041	14.719	11.8704	51.6898	48.9709	55.0826
1146	L920 (m/z=948.62963; rt=6.08365)	9.7157	11.2336	11.1881	9.29758	7.1889	7.01353	11.4915	7.66448	8.03598	6.68971	12.0921	11.6566	12.2562	19.5036	13.5591	50.5494	42.3173	48.5467
1147	L934 (m/z=342.230408; rt=6.12656)	6.57689	7.90146	7.23837	7.17595	5.67637	4.89039	9.44828	8.26221	8.83304	5.86459	11.5774	10.0728	13.5842	14.6887	11.8268	57.3501	51.8939	57.1387
1148	L936 (m/z=342.234516; rt=6.12675)	6.42527	7.94007	6.93098	7.25814	5.42892	4.67634	9.52161	8.01989	8.75	5.5666	11.293	9.77481	13.1741	14.813	11.4817	58.0542	52.5052	58.3862
1149	L937 (m/z=786.576653; rt=6.12744)	7.95339	7.07031	5.18654	7.72509	7.26106	3.98307	8.55509	8.3285	6.08615	7.21032	10.4253	6.16086	11.0657	15.2963	8.53724	57.4904	51.6185	70.0461
1150	L938 (m/z=786.577331; rt=6.12753)	7.95339	7.07031	5.18654	7.72509	7.26106	3.98307	8.55509	8.3285	6.08615	7.21032	10.4253	6.16086	11.0657	15.2963	8.53724	57.4904	51.6185	70.0461
1151	L921 (m/z=955.600851; rt=6.10552)	9.86929	9.85428	11.5907	11.1305	10.2114	11.7713	13.3737	13.2233	16.3527	12.5683	15.3387	15.7201	21.8519	25.9794	19.5044	31.2064	25.393	25.0607
1152	L926 (m/z=689.41694; rt=6.12405)	10.4999	11.2482	10.7716	11.9613	10.613	12.0811	15.2107	11.3576	15.2962	10.8465	18.2519	15.2648	20.4516	17.2355	22.7897	31.03	31.2938	23.7967
1153	L939 (m/z=792.571794; rt=6.12845)	18.4061	21.1983	19.0844	21.6504	18.2591	19.8571	12.3739	19.449	17.8583	15.1315	17.3859	17.8011	13.974	13.2839	13.4701	18.4642	10.4239	11.9291
1154	L942 (m/z=834.547321; rt=6.13211)	16.2224	22.468	27.6212	20.9833	16.1693	16.7262	18.1493	19.4847	13.437	13.9139	16.1059	14.3277	17.5356	14.4123	14.7169	13.1955	11.3598	13.1711
1155	L950 (m/z=772.554167; rt=6.14163)	22.1708	21.877	27.9803	23.259	16.1199	12.8857	18.0093	14.2389	15.4883	6.32755	15.2001	12.8	11.7117	16.1997	8.05266	18.5217	16.3644	22.7931
1156	L945 (m/z=772.529948; rt=6.14147)	22.247	21.9052	28.0921	23.4234	16.248	13.0523	18.1151	14.3623	15.6543	6.40695	15.216	12.9378	11.7753	16.1809	8.13576	18.0323	16.0876	22.1277
1157	L947 (m/z=773.555626; rt=6.14153)	21.9	22.6649	27.9339	23.529	16.9002	11.9045	17.4068	13.8874	16.136	7.08277	14.7502	12.0379	10.6732	15.2505	8.65301	19.4082	16.5469	23.3346
1158	L948 (m/z=773.556938; rt=6.14155)	21.9	22.6649	27.9339	23.529	16.9002	11.9045	17.4068	13.8874	16.136	7.08277	14.7502	12.0379	10.6732	15.2505	8.65301	19.4082	16.5469	23.3346
1159	L949 (m/z=386.275206; rt=6.14158)	21.4511	22.2878	28.9169	22.6071	15.9695	12.9684	17.9524	13.6792	15.2555	7.97216	15.8633	12.7007	11.6247	16.2924	7.79337	18.3926	15.9078	22.3652
1160	L946 (m/z=386.281654; rt=6.14147)	21.4243	22.1171	28.7914	22.29	15.9653	12.8499	17.9596	13.7555	15.0422	7.6515	15.5012	12.3908	11.4954	16.3884	7.70005	19.1792	16.2726	23.2256
1161	L944 (m/z=772.606223; rt=6.14022)	21.4944	19.9852	25.5764	19.7071	17.7374	12.0881	17.4931	15.3593	14.117	11.1882	17.7453	13.619	10.2732	14.4597	10.5604	19.844	14.7133	24.039
1162	L952 (m/z=773.605414; rt=6.14266)	21.8937	19.1043	23.1638	22.5484	17.6232	12.9965	16.9292	14.2054	16.9634	7.93625	16.6597	13.471	10.6673	16.7653	10.1468	20.0252	15.642	23.2585
1163	L943 (m/z=386.778789; rt=6.13999)	19.5714	20.6126	27.6946	24.2001	16.3569	12.2587	18.1173	15.4002	14.4288	9.6442	14.9892	12.0331	11.8905	15.3623	11.6683	16.5766	17.2789	21.9166
1164	L951 (m/z=257.521106; rt=6.1419)	20.8817	18.9266	26.1671	22.3886	16.7229	14.2001	19.0727	15.805	14.6365	9.56286	16.1244	13.6274	10.7581	17.6395	10.3122	17.3361	14.7817	21.0568
1165	L953 (m/z=391.282876; rt=6.15096)	21.8438	18.2167	15.1963	24.7426	11.4327	15.5259	10.9281	15.4149	18.3897	12.4817	17.8866	19.6016	12.5631	14.6707	9.929	17.4407	22.3784	21.3575
1166	L955 (m/z=391.285682; rt=6.15135)	21.8438	18.2167	15.1963	24.7426	11.4327	15.5259	10.9281	15.4149	18.3897	12.4817	17.8866	19.6016	12.5631	14.6707	9.929	17.4407	22.3784	21.3575
1167	L958 (m/z=790.564346; rt=6.15282)	22.5503	23.2976	25.3273	27.3288	17.5934	17.7502	14.4784	15.2553	18.0057	8.07776	16.9488	12.6521	17.8822	14.8414	9.38846	9.68264	12.0634	16.8763
1168	L956 (m/z=790.548428; rt=6.15226)	22.6297	23.3893	25.387	27.425	17.6627	17.8489	14.1773	15.3153	18.1058	8.1062	16.9427	12.7215	17.9451	14.7637	9.44068	9.71672	11.9262	16.4961
1169	L954 (m/z=791.548369; rt=6.15106)	17.1024	23.1898	27.5913	20.9073	16.7764	19.822	21.3474	17.8975	19.3916	10.1716	17.956	11.9966	9.04939	15.7247	10.1335	21.422	8.45557	11.065
1170	L959 (m/z=791.571987; rt=6.15337)	17.9576	22.2677	26.7216	22.1988	16.0245	18.6025	20.3333	16.2716	19.2211	10.9544	17.543	11.734	10.2344	15.6219	10.2275	18.3214	12.2714	13.4933
1171	L957 (m/z=794.534934; rt=6.15258)	19.183	17.2326	27.9648	24.4719	17.5956	14.8884	19.0488	19.2982	16.9362	12.6095	18.7392	18.0935	13.1978	16.5958	10.7085	11.4889	10.5386	11.4086
1172	L960 (m/z=794.558068; rt=6.15357)	16.7212	21.8365	23.4608	24.6145	15.8365	17.5821	19.7365	19.749	19.2884	12.5837	17.5101	15.8789	13.6243	15.7381	10.0146	12.7198	9.32977	13.7751
1173	L964 (m/z=774.567973; rt=6.18907)	16.7059	19.3399	23.2935	16.904	14.4655	11.7819	16.6367	12.7245	14.6147	6.72963	15.4135	12.2617	12.9361	17.2647	8.98009	30.0877	20.7918	29.0681
1174	L968 (m/z=775.573129; rt=6.19001)	17.2898	17.9599	23.0057	16.4689	14.7447	11.5256	16.4542	14.3742	14.845	6.68357	15.3265	12.3681	13.6707	16.6778	9.64909	29.4328	20.9169	28.6064
1175	L970 (m/z=775.548871; rt=6.19013)	17.2934	18.0249	23.0001	16.5344	14.7753	11.6721	16.5296	14.4593	14.8012	6.75158	15.4835	12.5177	13.74	16.5426	9.794	29.151	20.7144	28.215
1176	L963 (m/z=774.530842; rt=6.18858)	16.7357	19.2219	23.4962	16.9472	14.8608	11.8845	16.8296	12.9123	14.4111	6.68475	15.4061	12.4126	13.1049	17.2424	8.97323	29.6978	20.3564	28.8224
1177	L969 (m/z=776.574217; rt=6.19002)	16.931	19.5151	22.0784	16.6536	13.6227	11.6002	16.2606	14.0701	15.9053	6.77203	15.412	12.6768	14.3566	16.9986	9.20037	29.0262	20.3815	28.5388
1178	L977 (m/z=387.282806; rt=6.19158)	16.5857	19.6049	22.9336	17.7794	14.1081	11.5045	16.6586	12.5631	15.0781	6.50511	16.2425	12.593	12.8954	17.1171	9.22184	29.5758	20.3643	28.6689
1179	L975 (m/z=387.289155; rt=6.19079)	16.255	19.4828	22.8147	17.6929	14.1978	11.5141	16.3618	12.4564	15.0119	6.67068	15.998	12.4324	12.847	17.0874	9.13024	30.1726	20.7776	29.0966
1180	L976 (m/z=387.784649; rt=6.19113)	16.1368	18.8908	23.03	15.5719	14.5964	11.6449	15.9786	14.5381	14.2476	9.34933	14.7397	12.4056	13.654	16.6488	10.4252	29.3094	20.5861	28.2467
1181	L978 (m/z=258.193991; rt=6.19217)	14.983	18.5025	22.3502	17.6645	14.0584	11.91	17.481	12.4247	14.6168	7.9863	17.0344	12.471	14.779	17.169	11.1514	27.1062	20.8111	27.5006
1182	L979 (m/z=258.191421; rt=6.19451)	16.2905	18.0687	22.1432	16.2751	14.2626	12.0209	15.8135	13.4727	15.3082	8.26645	16.635	12.4791	15.2974	17.2379	11.0482	28.057	20.3232	27.0003
1183	L972 (m/z=387.79131; rt=6.19031)	16.7166	18.9197	22.843	15.8256	14.0031	11.944	15.7079	14.4062	13.9442	9.38743	14.6025	12.4787	12.4906	17.1745	9.6764	29.8718	20.8939	29.1136
1184	L961 (m/z=756.55724; rt=6.18541)	17.8234	19.0832	24.7581	16.2948	16.9376	11.794	15.2365	14.0803	15.5259	9.39681	15.0383	13.7247	16.4235	16.0484	9.4464	24.8251	18.8122	24.7509
1185	L973 (m/z=258.527473; rt=6.19037)	16.7261	17.6815	21.9596	16.0794	13.2915	11.1305	15.8407	15.1049	16.8843	9.2417	15.1456	12.7617	14.2665	17.438	10.5665	27.8456	21.3385	26.6974
1186	L962 (m/z=777.57777; rt=6.18806)	21.416	17.3391	19.3255	17.7478	16.5888	15.4941	17.382	14.7021	18.3696	11.9001	16.4988	14.0763	12.9235	16.069	10.7375	18.6306	18.8021	21.997
1187	L965 (m/z=796.554339; rt=6.18952)	18.0597	17.5244	26.2868	17.1166	19.6117	14.1391	18.0212	16.2157	19.3669	13.1211	15.924	17.1822	17.9452	20.5122	12.5213	15.7361	10.2121	10.5037
1188	L967 (m/z=796.549956; rt=6.1899)	18.0597	17.5244	26.2868	17.1166	19.6117	14.1391	18.0212	16.2157	19.3669	13.1211	15.924	17.1822	17.9452	20.5122	12.5213	15.7361	10.2121	10.5037
1189	L974 (m/z=796.529682; rt=6.19047)	20.3203	16.6873	26.1328	17.1926	20.7896	14.2601	19.001	16.1388	19.5295	13.5087	16.3365	17.5499	14.518	20.8797	13.1034	15.4594	9.16801	9.42433
1190	L971 (m/z=797.552708; rt=6.19016)	19.6029	19.0128	20.8724	17.8437	16.3583	18.4859	15.4782	16.8224	19.9479	15.6201	15.9816	20.1215	14.8013	19.4416	13.9122	16.6538	12.3834	6.66007
1191	L966 (m/z=797.535445; rt=6.18961)	19.8492	21.6937	19.8168	18.5075	16.5073	17.2761	14.662	16.7386	23.3905	14.9022	13.5878	19.2845	14.7644	17.343	12.4226	17.3147	14.1295	7.80948
1192	L980 (m/z=776.52916; rt=6.19824)	19.3598	20.1437	18.9205	16.9163	15.5089	15.4045	16.0591	13.3935	16.5509	12.3705	17.5527	16.6037	13.8064	16.52	12.5864	21.4879	16.8813	19.9339
1193	L981 (m/z=757.559085; rt=6.20157)	24.2249	22.8277	26.231	16.5342	12.8659	14.5647	13.7186	12.0812	16.8326	9.43543	14.2093	14.4228	13.9131	22.0669	11.3222	22.1738	15.949	16.6267
1194	L985 (m/z=948.630741; rt=6.22824)	7.8604	6.28784	7.26013	7.39634	6.67676	4.71303	9.43032	6.59519	8.74415	7.09286	11.3714	10.1399	13.3315	18.6713	12.986	54.8886	50.3975	56.1568
1195	L984 (m/z=949.634048; rt=6.22809)	8.45779	9.3179	7.75716	7.76727	7.98286	6.23113	10.7719	8.16969	7.20497	8.55941	10.8527	9.82681	14.2482	18.0988	12.3836	50.1955	45.5781	56.5963
1196	L982 (m/z=949.69035; rt=6.22054)	7.84226	11.3347	9.88804	0.996961	0.951383	0.608099	14.4829	11.5401	10.7299	11.5304	17.6593	14.4013	19.075	16.7497	16.1528	46.0725	41.7648	48.2199
1197	L986 (m/z=948.57195; rt=6.22924)	10.46	11.0123	8.51205	9.97259	10.2085	7.62448	14.9502	11.3292	10.5132	9.22668	9.10021	9.65692	11.3937	15.9582	12.8185	43.9968	42.3915	50.8748
1198	L983 (m/z=948.704544; rt=6.22596)	2.94608	2.00735	1.74242	2.19591	2.05671	1.32818	3.39663	2.17801	8.54294	2.77616	1.90221	1.69449	20.1809	29.564	20.8748	68.5044	62.2917	65.8172
1199	L994 (m/z=800.584177; rt=6.30623)	14.6432	19.1558	18.3354	16.623	13.9541	10.4506	18.0179	13.4677	15.0288	6.80497	16.0614	12.4209	13.4675	16.4952	10.1458	30.4435	20.8658	33.6184
1200	L995 (m/z=801.588866; rt=6.30706)	15.5956	18.3593	19.3944	14.9359	15.5959	12.5912	14.2392	13.5193	13.8555	8.26089	14.6856	11.9956	13.3367	16.7792	10.5627	33.6316	21.0607	31.6007
1201	L993 (m/z=800.54395; rt=6.30598)	14.8979	18.4462	17.8746	15.9009	13.9119	10.8497	16.8458	14.8741	14.4282	7.83933	16.6571	11.9481	14.3597	15.6998	10.1272	30.1564	20.4108	34.7721
1202	L987 (m/z=801.587441; rt=6.27979)	13.3731	16.8301	20.0474	15.0555	13.6659	10.617	16.23	14.2544	14.5965	7.91776	15.4841	11.8614	14.1298	17.5597	8.17255	33.2938	22.2059	34.705
1203	L997 (m/z=801.557728; rt=6.30769)	15.8077	18.2333	18.8624	15.2959	15.8114	12.8284	14.7464	13.5722	14.1922	6.40268	14.6984	12.2814	13.6938	16.8029	10.6825	34.0536	20.8818	31.1531
1204	L996 (m/z=802.59213; rt=6.30747)	15.7454	19.9558	17.7832	16.7735	14.858	14.6227	16.6082	17.3045	16.9166	11.9095	15.226	13.8036	15.8275	17.3262	12.0793	23.1358	15.3295	24.7946
1205	L990 (m/z=798.568567; rt=6.28283)	21.112	19.2169	21.2871	19.6035	16.3101	10.6718	17.1582	14.1493	18.0287	8.06791	15.4568	12.4882	13.1819	16.5923	10.3444	20.8765	18.2746	27.1798
1206	L991 (m/z=798.548631; rt=6.28301)	21.0658	19.108	21.36	19.6101	16.2531	10.7446	17.2461	14.4103	17.9413	8.08155	15.5467	12.5671	12.9687	16.4636	10.4916	21.0276	18.2183	26.8955
1207	L989 (m/z=799.575764; rt=6.28204)	17.9739	19.3185	22.7397	21.428	16.3942	13.1637	19.1732	16.0565	15.5933	10.1008	15.5408	12.3316	9.3164	16.8558	10.2562	22.0077	15.834	25.9155
1208	L988 (m/z=799.553593; rt=6.28193)	17.5126	19.2011	22.8489	21.7329	16.2607	13.0767	19.854	16.1239	15.7477	9.8415	15.7645	12.6091	9.38166	17.147	10.5214	21.6773	15.5028	25.1961
1209	L992 (m/z=399.285022; rt=6.28332)	19.8772	16.0353	20.4088	18.5134	17.6668	14.7932	17.6659	17.1885	15.1332	13.386	18.5991	12.3077	14.3875	16.4873	15.0623	16.17	14.023	22.2947
1210	L998 (m/z=400.292877; rt=6.30861)	15.9563	18.578	15.8319	15.974	17.6802	13.67	20.0504	16.1847	15.2359	13.3167	16.7059	16.0809	15.4916	15.768	12.3969	19.2111	15.0832	26.7842
1211	L1000 (m/z=794.534284; rt=6.33876)	24.1134	18.6795	25.93	22.1409	19.0363	18.6054	17.0344	16.8083	15.8627	13.1197	16.4797	19.7644	12.3558	16.7842	10.3885	11.2357	12.212	9.44904
1212	L999 (m/z=794.547349; rt=6.33834)	24.3415	17.7017	26.2119	21.8786	19.2582	18.745	17.0896	16.9492	15.5132	13.0493	16.7213	19.8782	12.2975	16.7735	10.0999	11.3435	12.5961	9.5518
1213	L1002 (m/z=794.529689; rt=6.33911)	24.0363	18.6795	26.1748	22.0701	19.0363	18.7811	16.9799	16.8083	16.0125	13.3374	16.4797	19.9511	12.3766	16.7842	10.4866	11.1998	12.212	8.59397
1214	L1005 (m/z=772.553882; rt=6.33942)	23.4846	21.6812	28.2826	23.4913	17.1833	13.2621	17.7902	15.2557	15.8682	6.71328	14.3931	12.8418	10.8205	16.1827	9.11284	17.7001	15.3039	20.6326
1215	L1006 (m/z=772.5302; rt=6.33945)	23.6258	21.6976	28.3394	23.5159	17.2754	13.3663	17.852	15.2471	15.9371	6.76537	14.4278	12.8475	10.7692	16.1201	9.15478	17.4717	15.2319	20.355
1216	L1003 (m/z=773.556884; rt=6.33923)	22.237	22.1436	27.3454	23.6051	17.5562	14.0422	18.7711	15.1449	17.0464	6.86684	15.2486	12.4586	10.4712	15.8383	8.87033	18.0487	14.0684	20.237
1217	L1004 (m/z=773.529574; rt=6.33934)	22.4297	22.2775	27.238	23.548	17.7731	14.3151	18.9471	15.1156	17.1892	6.93099	15.3489	12.4837	10.5197	15.6767	9.06101	17.6245	13.8083	19.713
1218	L1007 (m/z=386.275086; rt=6.33968)	23.1662	22.1315	28.7168	23.0795	16.95	12.6432	17.8276	14.3301	15.2118	7.69101	14.4948	13.1337	10.7962	16.628	9.59485	17.4396	15.4657	20.6996
1219	L1008 (m/z=386.281495; rt=6.33976)	23.1882	21.8737	28.6855	23.0781	16.925	12.5518	17.8721	14.6003	15.239	7.53732	14.3324	13.0161	10.5762	16.4921	9.43646	17.7481	15.7764	21.0712
1220	L1009 (m/z=386.778675; rt=6.34076)	22.5054	18.9301	26.2969	24.247	18.7909	14.4321	18.3787	15.9819	15.5296	6.10665	16.3179	11.1832	11.5363	15.8018	12.6434	17.226	14.1774	19.9148
1221	L1001 (m/z=257.520908; rt=6.33897)	22.3078	18.3385	24.9153	21.1081	17.6775	15.3686	17.8796	16.697	16.0203	10.1503	14.5066	15.118	10.1823	17.0721	10.7481	18.3718	15.7084	17.8297
1222	L1010 (m/z=812.580292; rt=6.42039)	20.6618	18.4502	23.4916	21.296	15.5714	15.3974	20.1211	13.6498	15.0658	8.28345	14.7047	13.2	10.5662	12.757	9.36676	19.0715	24.8669	23.4784
1223	L1011 (m/z=810.542255; rt=6.42228)	29.7213	37.3148	41.8102	33.1364	18.4111	15.9706	17.3496	16.4292	16.9186	5.99124	14.018	11.8057	5.93851	7.79097	5.60653	7.86287	6.03591	7.88846
1224	L1013 (m/z=811.546194; rt=6.42299)	23.751	30.2795	40.9862	30.9791	18.8662	13.5779	18.2066	14.2682	16.0021	8.68225	13.1112	12.8655	9.76431	14.8028	8.51123	8.61668	8.67203	8.05711
1225	L1014 (m/z=811.539944; rt=6.42343)	23.751	30.7784	41.7495	30.9791	19.177	13.8308	18.2066	14.5033	16.3001	8.68225	12.1503	13.105	9.76431	15.0466	8.66974	8.61668	8.34436	6.34483
1226	L1012 (m/z=812.546212; rt=6.42238)	25.8558	27.8802	34.0671	27.9827	15.203	15.3133	16.5309	15.0595	14.8458	7.86407	13.6945	11.3835	9.75827	12.8925	8.92943	12.0082	15.2704	15.4608
1227	L1016 (m/z=776.583235; rt=6.44457)	26.1119	23.3939	27.8394	25.7218	17.7349	12.803	18.057	12.6501	13.0594	6.09346	14.4915	13.9587	8.58573	15.2637	7.63813	15.4301	16.4659	24.7015
1228	L1015 (m/z=777.585308; rt=6.44393)	20.2233	19.6107	26.0628	25.4728	14.2993	12.6472	16.8586	18.2612	17.8515	9.68906	12.6942	10.4178	7.97186	14.8384	8.67639	19.7843	20.2962	24.3442
1229	L1088 (m/z=764.533918; rt=6.54777)	6.17376	10.9622	11.7635	6.70037	8.58835	6.71252	11.1272	10.4312	13.2189	7.46902	15.3587	15.1939	18.887	19.8457	17.989	49.6426	34.8138	35.1222
1230	L1070 (m/z=765.537533; rt=6.54762)	6.25449	10.9797	11.7027	6.84149	8.52009	6.75463	11.102	10.4514	13.0465	7.61033	15.2622	15.3092	19.012	20.0844	18.2525	49.1797	34.7023	34.9345
1231	L1057 (m/z=766.541752; rt=6.54753)	6.32263	11.114	11.9192	6.81185	8.59255	6.70957	11.1995	10.4549	13.1865	7.55495	15.563	15.1617	19.2746	20.3006	18.3074	48.8365	33.9749	34.7156
1232	L1085 (m/z=382.268123; rt=6.54773)	6.1665	10.9109	11.6823	6.64298	8.52152	6.64896	11.0361	10.4001	13.1721	7.43882	15.3204	15.2665	18.9118	19.8743	17.9472	49.8038	34.9728	35.2829
1233	L1066 (m/z=382.770083; rt=6.54761)	6.20303	10.8148	11.6012	6.77822	8.38836	6.60303	10.9039	10.2991	13.1093	7.60807	15.4219	15.2866	18.674	19.7911	18.0128	49.8327	35.2847	35.387
1234	L1087 (m/z=254.848408; rt=6.54776)	6.27532	10.8641	11.7316	6.80033	8.5896	6.70721	11.2149	10.4262	13.2685	7.58611	15.4063	15.2265	18.6412	19.843	17.9149	49.4822	34.8708	35.1514
1235	L1062 (m/z=766.504795; rt=6.54755)	6.5527	11.0775	11.9379	7.1028	8.70988	6.80528	11.486	10.4912	13.1647	7.87072	15.6297	15.1696	19.1215	20.2603	18.3142	47.8662	33.8315	34.6082
1236	L1068 (m/z=585.45593; rt=6.54761)	6.71746	12.2696	12.9805	7.41625	9.27618	7.4236	12.1234	11.0568	13.5668	7.8624	15.5633	15.3053	18.2794	19.531	17.4697	47.601	32.3031	33.2542
1237	L1073 (m/z=585.441873; rt=6.54764)	6.82246	12.1556	12.9951	7.53218	9.27211	7.40406	12.0505	11.1812	13.5998	7.97572	15.5355	15.3267	18.3834	19.462	17.3975	47.2357	32.3936	33.2767
1238	L1061 (m/z=767.545717; rt=6.54755)	6.28982	10.8382	11.4864	6.63687	8.58724	6.32542	11.376	10.3618	12.8011	7.34537	15.045	15.4746	19.0927	19.712	18.4168	49.2593	35.4557	35.4957
1239	L1071 (m/z=255.183046; rt=6.54763)	6.20936	11.0613	11.7949	6.7491	8.54324	6.82881	11.3422	10.542	13.2552	7.661	15.5146	15.3395	19.2241	19.8926	18.1602	48.8143	34.4463	34.6214
1240	L1055 (m/z=383.272016; rt=6.54749)	6.21066	10.877	11.886	6.53935	8.51008	6.6306	11.0299	10.35	13.2393	7.47944	15.5734	15.4306	19.16	20.3729	18.1807	49.5806	34.3166	34.6329
1241	L1072 (m/z=767.517798; rt=6.54763)	6.52533	10.7389	11.6947	6.81885	8.52736	6.2747	11.5942	10.3372	12.992	7.49099	15.3815	15.7612	18.855	19.6517	18.1949	48.7157	35.3635	35.0824
1242	L1086 (m/z=254.853016; rt=6.54774)	6.02851	11.6442	12.0856	6.57825	8.94668	7.17315	11.2706	10.7762	13.7402	7.30441	15.411	15.4859	19.9179	19.6072	17.8403	48.9003	33.6148	33.6749
1243	L1067 (m/z=586.459975; rt=6.54761)	6.77911	12.0661	13.087	7.00692	9.10064	7.3688	11.1542	10.8325	13.7768	7.56849	15.6731	15.4122	20.1726	19.5974	17.8622	47.3186	32.7303	32.493
1244	L1076 (m/z=586.447661; rt=6.54767)	6.96067	11.9569	13.1448	7.15373	9.04662	7.34539	11.1968	10.7982	13.6366	7.64512	15.5028	15.4288	19.9757	19.8465	17.8111	47.068	32.8489	32.6334
1245	L1078 (m/z=307.227986; rt=6.54769)	6.98283	11.8542	12.7097	7.69806	9.35849	7.76283	11.974	10.921	13.5547	8.46969	15.6364	15.3232	18.234	19.8011	17.9073	46.6414	32.4287	32.7423
1246	L1089 (m/z=254.841967; rt=6.54778)	7.05403	10.7971	11.9438	7.47277	8.39846	6.45576	11.4519	10.4584	13.2999	8.48802	16.0082	15.0882	17.9253	20.2957	17.8666	47.608	34.0422	35.3457
1247	L1091 (m/z=335.259751; rt=6.54785)	7.5911	12.5585	12.711	7.41341	10.0029	7.98457	11.9216	10.9803	14.3535	8.46072	16.6726	15.2261	18.5195	18.2841	17.8779	46.0937	31.5015	31.847
1248	L1019 (m/z=928.605472; rt=6.49641)	4.31863	6.706	7.68785	5.39952	5.57073	4.15823	8.86544	7.90144	8.92826	6.36771	12.9308	11.517	15.5906	20.4625	15.5931	59.4581	46.4285	52.1156
1249	L1094 (m/z=335.255405; rt=6.54791)	8.24074	12.3235	12.6628	7.57949	9.97491	7.91797	11.6049	10.8927	14.2435	8.78122	16.6747	15.3972	18.0439	18.5429	17.6304	45.7498	31.5913	32.148
1250	L1083 (m/z=307.223906; rt=6.5477)	7.07064	11.6159	12.7333	7.77742	9.38857	7.74546	11.8169	10.8414	13.6214	8.73099	15.4607	15.1948	17.9864	19.8677	17.8965	46.6176	32.8257	32.8087
1251	L1018 (m/z=928.574673; rt=6.49547)	4.5631	6.8037	8.01985	5.46384	5.75014	4.32607	9.26	8.15909	9.1262	6.50166	13.1649	11.879	15.7095	20.6109	15.8183	58.5019	45.5113	50.8306
1252	L1051 (m/z=255.517725; rt=6.5474)	5.99593	11.1792	11.7841	6.39146	8.35069	6.77328	11.4707	10.5936	13.1045	7.35496	15.8277	15.3224	19.2277	20.0901	18.3006	49.5593	33.9587	34.7151
1253	L1090 (m/z=191.133703; rt=6.54781)	6.86053	10.5543	11.7963	7.01843	8.45923	6.39339	10.912	10.2576	13.4124	7.93202	15.6685	15.2008	18.7473	19.8256	17.5965	48.5297	35.2347	35.6006
1254	L1065 (m/z=567.444595; rt=6.54759)	6.66399	11.5461	12.5181	7.54239	9.31268	7.67226	11.8031	11.5119	14.0051	7.76102	14.7864	14.8253	18.9921	19.2088	17.8966	47.2374	33.6341	33.0826
1255	L1020 (m/z=929.611525; rt=6.49643)	5.09462	6.89376	7.71945	5.30008	5.57039	4.42026	9.27489	6.993	9.90451	5.80564	13.3945	11.9546	15.5577	20.1757	15.2015	58.967	46.9727	50.7998
1256	L1081 (m/z=292.726952; rt=6.5477)	7.09523	11.9482	12.9171	7.91513	9.09723	7.13935	11.8687	11.0997	13.2544	7.54495	16.0992	15.2199	17.9543	19.2143	17.9416	47.6217	32.5413	33.5277
1257	L1060 (m/z=292.730389; rt=6.54755)	6.79828	11.9167	12.7412	7.51154	8.89517	7.16707	12.118	11.1105	13.3234	7.22075	15.8818	15.1939	18.4766	19.4211	18.0532	47.8748	32.7748	33.5212
1258	L1080 (m/z=191.137116; rt=6.54769)	6.11321	11.3944	11.4466	6.6687	8.40629	6.48481	11.364	10.2384	13.3871	6.91957	16.1335	15.4543	18.5778	19.7448	18.6173	50.3566	34.0826	34.6099
1259	L1069 (m/z=255.188646; rt=6.54762)	5.32003	11.565	11.6873	6.06652	8.59088	6.52414	10.3777	10.436	13.979	6.77422	15.6741	15.5285	19.7399	19.634	17.4725	51.7216	34.1	34.8086
1260	L1017 (m/z=929.578391; rt=6.49536)	5.07141	7.09624	7.90832	5.46678	5.68778	4.71388	9.54888	7.18848	10.187	6.22383	13.7015	12.1113	15.5124	19.6502	15.3618	58.1767	46.6758	49.7177
1261	L1058 (m/z=567.431401; rt=6.54754)	7.00574	11.511	12.3916	7.51518	9.20342	7.46057	11.807	11.3969	14.0301	7.92167	14.483	14.7609	18.6669	18.8087	17.6744	47.0835	34.597	33.6824
1262	L1084 (m/z=255.175496; rt=6.54772)	6.43822	10.3557	11.4255	6.94725	8.33079	6.5471	11.7307	10.7417	12.8957	7.97693	15.6002	15.6201	18.1885	19.2988	18.4401	48.7184	35.6729	35.0715
1263	L1052 (m/z=768.547637; rt=6.5474)	6.19826	10.79	11.2648	6.8637	8.08289	7.34188	10.9912	10.5661	14.1538	6.78787	15.0081	14.7984	18.0912	19.7568	17.2751	51.0678	35.7961	35.166
1264	L1075 (m/z=152.908581; rt=6.54766)	6.54702	10.9944	11.7891	6.4043	8.51627	6.30451	11.3354	10.3579	13.3063	7.12504	15.9705	14.9533	18.8466	19.2326	17.8762	49.7416	34.9282	35.7705
1265	L1064 (m/z=587.461397; rt=6.54758)	6.22498	11.823	13.0504	7.50693	9.24491	7.26321	11.3493	11.1088	13.9114	6.4605	15.5402	14.8457	17.2624	17.9402	17.9887	51.1959	34.3429	32.9406
1266	L1050 (m/z=383.77205; rt=6.54734)	6.26374	10.5655	10.8046	6.27107	8.30856	5.97477	10.631	10.0703	12.2831	7.08173	15.2079	15.3785	19.3084	19.0214	18.7397	50.444	36.8263	36.8192
1267	L1053 (m/z=383.259283; rt=6.54742)	6.48043	10.5828	11.7369	6.80122	8.68081	6.74258	11.6487	10.4364	12.7545	8.57761	16.3081	14.7987	18.1739	19.7701	17.7183	48.3181	34.2218	36.249
1268	L1092 (m/z=336.262458; rt=6.54787)	7.79093	14.018	12.9953	7.4657	10.0366	10.0376	12.9747	12.0963	12.3389	8.5378	16.9717	15.6242	19.4253	18.229	19.0201	43.8056	28.6484	29.9838
1269	L1049 (m/z=383.777847; rt=6.54724)	5.99455	10.7474	10.6665	5.95169	8.28025	5.94189	10.8125	10.1161	12.0447	7.09365	14.8452	15.4263	19.5687	19.2483	18.4919	50.5789	36.7627	37.4287
1270	L1082 (m/z=382.245092; rt=6.5477)	7.1333	10.3244	12.5036	8.56122	9.24485	7.3297	10.1782	11.0163	13.2852	10.048	14.2202	15.5373	19.009	20.8878	16.9721	45.0702	34.3064	34.3721
1271	L1095 (m/z=768.518623; rt=6.54809)	8.51776	12.3271	12.0882	9.24231	9.06699	8.24483	12.1064	10.4739	13.667	6.81104	14.9749	13.8262	17.0787	19.6906	17.3605	46.2438	33.4665	34.8133
1272	L1079 (m/z=382.786935; rt=6.54769)	5.37278	10.6796	10.8098	5.34129	8.20412	6.20747	9.16052	9.43513	13.9059	6.46014	15.631	15.0203	18.1173	19.4568	17.6737	55.548	36.5933	36.3828
1273	L1074 (m/z=255.513284; rt=6.54766)	6.48837	10.9056	11.907	6.46511	8.50773	6.67549	12.2301	10.6632	13.35	8.84854	16.8793	15.2449	18.6018	20.053	17.5781	47.3661	32.9911	35.2445
1274	L1097 (m/z=152.90724; rt=6.54818)	6.89355	10.6736	11.6125	7.48748	7.99394	5.81667	11.0207	10.3247	13.5764	8.24078	16.4311	14.705	16.5356	18.9813	17.0752	49.8218	35.5954	37.2142
1275	L1096 (m/z=765.636992; rt=6.54815)	6.70009	10.5869	10.4705	6.29518	7.62403	5.87751	7.98796	8.44569	13.3444	6.33663	15.1733	12.7643	16.111	19.8693	19.7928	56.5691	38.3008	37.7505
1276	L1056 (m/z=191.384475; rt=6.54751)	7.76878	10.8803	11.5266	6.61854	8.03205	6.22468	10.633	10.0894	13.2242	6.83397	16.0668	15.3008	18.3015	19.5777	17.9871	49.8442	35.3537	35.7366
1277	L1093 (m/z=233.190407; rt=6.54789)	7.47577	11.5541	13.1401	6.67518	9.41034	6.82491	12.1935	10.6725	13.7536	9.18021	15.0438	17.0747	16.1357	17.9663	16.1989	48.3397	35.3531	33.0078
1278	L1048 (m/z=191.388002; rt=6.54717)	8.51077	11.2298	12.9741	7.16603	9.12691	7.37831	12.5291	11.625	12.1378	7.71363	14.6443	16.7582	19.6967	21.7939	17.8117	44.3838	31.5801	32.9399
1279	L1098 (m/z=382.748376; rt=6.54819)	6.94543	9.97552	10.8887	5.89411	7.78917	5.76707	9.12422	9.18425	12.7591	6.6326	16.266	14.0697	15.5782	19.6808	18.2218	55.8254	37.1043	38.2936
1280	L1100 (m/z=568.449131; rt=6.54903)	9.03334	11.8867	12.0244	7.20438	9.54272	7.18068	11.2971	10.2964	13.2667	10.5326	15.312	16.5774	16.3687	19.3633	17.7323	45.5638	33.5988	33.2186
1281	L1102 (m/z=568.439154; rt=6.54958)	9.18187	11.3908	12.3121	7.69852	9.52386	7.04682	11.0658	10.2356	13.5165	10.7787	14.7246	17.1075	16.642	19.5475	18.1113	44.6331	34.5777	31.9057
1282	L1077 (m/z=308.231118; rt=6.54767)	10.2335	12.2607	13.3246	10.328	9.90898	6.97473	10.7132	11.7331	14.5803	6.74768	15.9008	13.7007	15.6002	18.5511	19.2189	46.3774	31.6453	32.2008
1283	L1022 (m/z=752.527978; rt=6.52324)	16.8664	20.7005	24.3464	13.2373	14.5468	12.3083	15.9809	14.3098	18.489	6.77778	17.0072	16.009	16.9798	17.3352	11.9574	30.158	16.1005	16.8899
1284	L1021 (m/z=753.530544; rt=6.52299)	16.5147	18.911	23.7649	10.7456	14.1171	12.5432	16.5552	13.4144	17.4295	10.6728	17.4166	15.6724	16.365	18.5819	12.1753	29.1467	17.5591	18.4148
1285	L1026 (m/z=798.573605; rt=6.52824)	15.8244	23.0049	25.3605	17.9549	17.3771	14.4475	21.6289	16.0063	19.2937	8.63708	19.8276	19.0097	19.3647	14.1988	12.9536	16.59	9.58519	8.935
1286	L1024 (m/z=798.549167; rt=6.5262)	15.9837	22.3254	24.8801	18.4746	17.8218	14.7661	21.3065	16.2226	18.955	8.98703	20.0857	18.7405	19.1238	14.1262	12.813	16.1245	9.41824	9.84532
1287	L1027 (m/z=799.578842; rt=6.5289)	16.4514	20.6507	26.6131	18.0901	17.1697	14.5492	23.1227	18.2644	20.1848	9.99223	17.575	15.68	14.9611	15.6835	12.1212	17.3825	10.6566	10.8517
1288	L1025 (m/z=799.554736; rt=6.52714)	17.8315	21.1	25.732	18.5355	17.8105	14.2529	23.3908	18.7709	20.1766	9.20318	16.9762	16.1798	14.4135	15.8495	11.3008	16.6256	9.49299	12.358
1289	L1023 (m/z=798.534167; rt=6.52481)	15.7041	22.3086	23.7629	19.0377	18.7981	14.7346	21.1928	16.2724	18.5261	9.77229	20.8677	18.0554	19.0011	13.3804	12.8563	15.2919	8.37291	12.0646
1290	L1028 (m/z=391.28824; rt=6.54042)	19.3122	14.9424	12.8474	18.1082	25.6784	23.0609	15.905	18.4821	21.0286	20.8567	11.6515	18.6869	13.4082	11.8904	10.017	12.4097	17.3551	14.3592
1291	L1029 (m/z=391.282806; rt=6.54045)	19.391	14.7089	12.8891	18.1821	26.0328	23.1958	15.5886	18.7371	21.1517	20.9418	11.322	18.7962	13.4362	12.0545	10.0756	12.4603	17.1447	13.8917
1292	L1054 (m/z=792.56931; rt=6.54743)	20.204	28.0732	27.9055	12.2319	15.8856	16.2341	19.0402	14.0029	15.4046	10.625	14.9033	13.3147	17.7703	13.2859	13.5127	20.1286	13.849	13.6285
1293	L1031 (m/z=792.541224; rt=6.5451)	23.2595	29.3498	30.6895	14.4058	16.6616	17.5091	18.3457	14.5604	15.8404	11.7246	15.3056	13.0119	15.7099	12.7356	12.1387	16.5545	11.3871	10.8104
1294	L1046 (m/z=793.572475; rt=6.54672)	21.5508	26.4867	29.0741	14.3595	17.2892	16.3065	18.3465	14.7668	15.9526	10.2418	13.329	14.2151	16.2751	14.0235	12.2696	19.2263	14.105	12.1821
1295	L1037 (m/z=793.558529; rt=6.54572)	22.0924	26.8294	29.523	14.7205	17.5129	16.5583	18.8076	14.9578	16.1989	10.4992	13.5014	14.2979	16.6841	14.0065	12.438	17.1961	13.192	10.9838
1296	L1042 (m/z=794.575372; rt=6.54641)	21.4857	29.1874	26.7359	14.3366	15.816	16.371	17.6865	11.9756	15.722	10.3157	16.3461	13.4844	15.8683	12.7523	13.3048	20.3073	13.9225	14.3818
1297	L1040 (m/z=794.55575; rt=6.5461)	22.5131	28.9804	27.3052	14.335	16.4037	16.6386	17.1906	12.0083	15.8938	10.6417	16.6329	13.3979	15.4503	13.2141	13.2698	19.8693	12.7605	13.4947
1298	L1044 (m/z=396.284479; rt=6.54649)	19.3694	26.6661	27.5056	11.3711	15.757	16.5485	18.1888	14.2655	15.2879	11.5115	14.44	14.8342	18.0936	13.7322	11.9599	21.4655	15.1392	13.8639
1299	L1030 (m/z=792.505135; rt=6.54336)	21.1431	28.3455	24.6723	11.8419	17.5847	17.4417	19.9315	14.8539	16.1172	13.1919	14.367	14.9341	17.7064	14.4797	13.7987	16.1852	10.3692	13.036
1300	L1036 (m/z=769.475171; rt=6.54562)	12.9871	17.0211	16.2599	15.6285	18.0111	18.2934	19.604	18.8968	19.3148	17.1414	17.7449	18.1799	20.6179	16.5299	18.0381	14.0211	11.7961	9.91392
1301	L1038 (m/z=769.495591; rt=6.54578)	12.7625	17.1653	16.2745	15.323	17.8676	18.1947	19.6314	18.7859	19.4435	16.8703	17.7006	18.2558	21.0261	16.5261	17.9341	14.3867	11.9545	9.89735
1302	L1032 (m/z=770.494275; rt=6.54515)	13.0448	17.0153	16.3419	15.2292	17.8547	18.2728	19.3222	18.64	18.745	17.2696	17.3801	19.2607	20.7025	16.5464	17.1833	14.4317	12.5635	10.1962
1303	L1035 (m/z=384.744993; rt=6.54561)	12.6304	16.8155	16.2979	15.2545	18.2026	18.0875	19.4732	19.2003	18.8781	17.4883	17.3249	18.5645	20.5818	16.5982	19.0984	14.5717	11.8585	9.07371
1304	L1034 (m/z=771.497981; rt=6.54545)	13.1865	17.3378	16.2678	14.4999	17.7406	18.8129	18.8593	18.5192	18.8545	17.7186	18.1889	19.343	21.9389	16.9613	18.2893	13.7969	11.2522	8.43249
1305	L1039 (m/z=384.751033; rt=6.54588)	12.4067	16.8758	16.3373	14.806	17.7501	17.9872	19.7502	19.0982	19.1988	16.9881	17.5727	18.726	21.2241	16.4825	18.8489	14.8249	12.2207	8.9018
1306	L1033 (m/z=385.248206; rt=6.54517)	12.5557	17.1776	15.6407	15.0227	17.4297	16.8705	19.334	18.8022	18.3789	17.9372	16.725	18.6008	20.2343	15.8386	17.2219	14.9162	14.0269	13.2872
1307	L1043 (m/z=256.500666; rt=6.54642)	12.3254	18.3097	15.3913	14.0375	17.2637	18.0528	18.7857	18.8465	19.6438	16.6402	17.2648	17.6828	22.3558	15.6469	18.3864	15.8555	12.6683	10.8428
1308	L1041 (m/z=785.465201; rt=6.54623)	13.1476	19.2409	18.7939	14.356	17.7489	19.01	19.7727	19.7695	18.9405	17.0157	16.3851	17.3713	21.7979	16.4104	17.2591	13.91	10.4452	8.62534
1309	L1045 (m/z=786.468917; rt=6.54666)	13.7861	20.3106	18.4913	14.7485	17.4256	17.5548	18.1632	19.2033	18.8018	16.162	16.7135	18.5214	21.0044	15.6569	15.5531	16.1359	10.6902	11.0776
1310	L1047 (m/z=787.469963; rt=6.54706)	12.2349	19.4806	17.0665	14.6507	19.679	15.1431	16.9722	19.0655	18.2062	15.3457	18.1298	16.7219	20.7767	13.1356	17.7222	20.0198	10.5095	15.1402
1311	L1059 (m/z=806.561778; rt=6.54755)	7.63971	14.1132	14.5461	8.90979	12.2606	11.2278	15.2934	14.4432	17.0314	11.0621	18.5621	19.1879	24.3577	22.0294	21.1261	32.7373	18.5915	16.8806
1312	L1063 (m/z=806.561732; rt=6.54756)	7.63971	14.1132	14.5461	8.90979	12.2606	11.2278	15.2934	14.4432	17.0314	11.0621	18.5621	19.1879	24.3577	22.0294	21.1261	32.7373	18.5915	16.8806
1313	L1099 (m/z=805.563214; rt=6.549)	5.57741	8.59368	8.55202	5.09076	8.37768	6.46153	11.0547	12.165	14.652	19.5375	19.6694	22.5769	25.9837	27.4668	27.3535	32.7559	23.7274	20.404
1314	L1101 (m/z=806.526737; rt=6.54913)	8.67294	15.0798	17.8399	12.1098	13.9331	13.4099	15.98	16.1085	17.7926	14.1404	18.4764	18.9287	23.8576	19.6017	21.2481	25.2393	16.8005	10.7807
1315	L1103 (m/z=772.511095; rt=6.55532)	14.391	22.516	20.2726	16.3747	19.9236	17.3985	19.3033	18.2392	17.1873	18.3855	16.7791	14.3445	20.557	12.6556	14.837	10.9885	9.88655	15.9601
1316	L1104 (m/z=437.745075; rt=6.56583)	12.5816	9.54743	8.63219	16.2995	10.2925	8.2396	14.5117	9.92409	15.3793	14.2435	13.8888	11.6847	8.58348	21.7385	16.0985	33.7801	34.6087	39.9657
1317	L1105 (m/z=388.341144; rt=6.56646)	18.0388	15.2429	11.2576	17.8474	21.385	20.3122	22.5368	14.521	15.7076	19.1336	17.3885	16.8071	11.5895	17.4571	27.806	10.854	14.0055	8.10949
1318	L1107 (m/z=388.345121; rt=6.56953)	18.0388	15.2429	11.2576	17.8474	21.385	20.3122	22.5368	14.521	15.7076	19.1336	17.3885	16.8071	11.5895	17.4571	27.806	10.854	14.0055	8.10949
1319	L1106 (m/z=800.587099; rt=6.56825)	14.6	23.6176	25.6976	15.4766	21.9683	17.9448	21.931	15.7307	18.3355	12.3759	17.3771	16.1879	17.3002	13.6482	9.74667	18.3163	7.6581	12.0874
1320	L1109 (m/z=801.587851; rt=6.58541)	18.1378	18.9463	27.143	17.7679	20.3117	14.562	16.7914	15.6945	20.8143	11.6298	18.6155	15.5909	18.2144	13.9706	7.60242	17.4586	12.4615	14.2873
1321	L1108 (m/z=772.554975; rt=6.57071)	16.3617	27.9118	26.2823	20.1081	18.2137	13.7644	19.723	12.3878	17.7193	13.3732	13.6511	9.51455	17.4955	15.9394	9.66275	12.9386	11.8961	23.0568
1322	L1110 (m/z=802.601429; rt=6.59462)	17.5436	17.111	24.8551	19.0728	18.2207	14.2217	19.6331	16.0231	15.3597	11.3257	14.8409	13.9076	15.2	22.278	12.2725	17.2249	11.5263	19.3833
1323	L1114 (m/z=941.533861; rt=6.59733)	8.54111	9.0981	8.52065	10.7717	7.1627	7.55323	10.78	9.71205	15.9151	8.62291	16.7519	17.256	21.1513	22.9497	23.9209	40.133	34.3256	26.834
1324	L1111 (m/z=942.537048; rt=6.5958)	9.22747	9.4233	7.91482	11.3167	6.66892	7.11598	11.1333	9.02027	16.4476	8.63915	17.0339	18.2433	21.346	21.2492	23.4246	38.3374	36.6044	26.8536
1325	L1113 (m/z=942.537002; rt=6.59725)	9.22747	9.4233	7.91482	11.3167	6.66892	7.11598	11.1333	9.02027	16.4476	8.63915	17.0339	18.2433	21.346	21.2492	23.4246	38.3374	36.6044	26.8536
1326	L1112 (m/z=941.584811; rt=6.596)	8.09294	8.07637	7.98811	10.5936	6.12387	6.40573	10.2023	9.0818	14.8242	7.62383	16.9483	16.0214	20.0082	25.9001	23.9899	43.4791	33.8695	30.7707
1327	L1115 (m/z=952.66427; rt=6.60482)	14.6864	11.6273	17.0591	14.1882	15.6866	14.267	13.8305	14.2107	18.3425	10.4284	18.4162	16.8522	14.8127	15.2099	17.5636	32.0538	24.8495	15.9157
1328	L1116 (m/z=837.559152; rt=6.60772)	12.4011	17.6403	21.9661	13.7432	12.538	15.0356	14.5797	9.52963	15.6032	11.0899	12.7018	13.1996	24.1922	31.9908	14.7608	23.9939	15.5995	19.4347
1329	L1117 (m/z=477.813741; rt=6.61326)	5.46961	8.83712	9.53258	6.2304	7.68968	7.17737	15.0808	11.4948	10.4984	7.77616	15.1346	14.1114	16.4537	18.4053	18.9802	48.9894	38.4385	39.7001
1330	L1118 (m/z=953.659222; rt=6.61367)	11.3505	13.621	15.2562	14.1777	11.7079	11.7025	16.2201	10.6548	14.2163	12.9786	14.9533	16.0327	16.193	17.2529	17.0701	29.0801	31.81	25.7222
1331	L1121 (m/z=953.626375; rt=6.63012)	10.2403	11.9839	12.6234	12.4978	9.6583	10.1928	14.9181	9.547	14.1225	12.6869	16.971	17.1873	14.1121	15.7373	18.2994	35.5448	36.1025	27.5745
1332	L1127 (m/z=834.545911; rt=6.6332)	10.2588	7.42491	15.8415	7.57768	6.92322	11.3642	15.1336	10.7416	7.68042	13.6046	13.9928	19.0696	26.6628	41.6986	21.9225	26.7625	19.2189	24.1219
1333	L1137 (m/z=760.517602; rt=6.64237)	8.50818	6.60259	11.7449	9.19243	6.15618	9.67165	12.8024	7.45335	9.91336	11.2051	11.9323	14.8661	27.2218	47.0479	16.6206	31.07	20.8077	37.1833
1334	L1124 (m/z=834.519532; rt=6.6325)	10.5878	7.49734	16.0341	7.83436	7.27941	11.8383	15.5111	10.8512	7.73292	14.0684	13.8581	18.8558	26.4149	41.7888	21.7611	25.5834	18.7251	23.7777
1335	L1126 (m/z=835.55; rt=6.63308)	10.1356	6.9057	16.0098	7.46247	6.99604	11.9629	15.9505	10.1633	7.25921	12.9363	14.4432	18.314	25.8146	41.9741	21.6081	27.7005	19.5177	24.8459
1336	L1136 (m/z=761.521558; rt=6.6422)	8.40962	6.32489	10.8875	9.80903	6.37529	10.6264	12.6359	7.45872	10.1634	12.1632	13.0484	15.2947	26.9357	46.7278	16.5872	30.0465	20.0649	36.4409
1337	L1133 (m/z=761.499771; rt=6.64175)	8.5976	6.336	11.1589	10.1099	6.5437	10.9776	12.6894	7.48156	10.1164	12.5005	12.7784	15.105	27.3893	47.3851	16.4463	28.7132	19.4752	36.1957
1338	L1123 (m/z=835.517989; rt=6.63203)	10.5474	7.2026	16.1383	7.40554	7.17713	12.5837	16.0122	10.3248	7.28004	13.5377	14.62	17.6967	26.1782	41.6779	21.8916	26.3191	18.9975	24.4097
1339	L1134 (m/z=760.474494; rt=6.64186)	9.23409	6.46358	11.495	9.20965	6.1823	10.5699	13.1246	7.42977	9.9542	11.8841	11.2839	14.7169	27.9953	49.7227	16.5563	28.5523	18.9177	36.7077
1340	L1119 (m/z=836.552356; rt=6.62414)	8.78138	9.41226	17.5962	9.07035	5.96671	10.8202	13.5968	8.93966	8.31827	13.3285	12.0141	16.8089	25.6809	42.4281	21.0757	29.5421	21.2391	25.3808
1341	L1135 (m/z=380.258142; rt=6.64209)	9.11581	6.60316	12.0965	9.07523	6.21623	10.1933	12.9562	7.60643	10.0415	10.5147	11.9023	14.9834	27.1479	46.9633	16.739	31.1901	20.7086	35.9463
1342	L1138 (m/z=380.261631; rt=6.64252)	9.11581	6.60316	12.0965	9.07523	6.21623	10.1933	12.9562	7.60643	10.0415	10.5147	11.9023	14.9834	27.1479	46.9633	16.739	31.1901	20.7086	35.9463
1343	L1131 (m/z=762.525136; rt=6.64125)	7.86002	7.14434	13.087	9.64341	6.89501	11.9654	13.6582	8.90676	13.9615	12.7915	11.5622	17.2838	27.9458	50.1686	17.9373	28.101	15.3231	25.765
1344	L1122 (m/z=417.272226; rt=6.63172)	10.6643	6.70341	15.7908	7.21422	7.23545	12.1698	15.7537	10.1658	7.1641	13.846	13.768	18.7236	26.3487	42.2242	22.3886	26.173	19.9033	23.7632
1345	L1128 (m/z=417.274093; rt=6.64018)	10.6899	6.82867	16.0973	7.2315	7.37066	12.406	15.7914	10.3557	7.30315	13.8792	14.0252	19.087	26.4118	41.1445	22.8232	25.9962	20.2752	22.2834
1346	L1125 (m/z=417.278674; rt=6.63271)	10.0011	6.67433	15.6986	6.72129	7.03423	11.4758	15.8781	10.034	7.23224	13.1511	13.9257	19.0237	26.4939	42.0269	22.383	27.7545	20.3048	24.1867
1347	L1129 (m/z=762.500246; rt=6.64051)	9.59543	7.30182	16.1951	10.4029	7.14351	12.424	14.6537	8.79636	13.6562	12.73	13.4263	17.5632	28.2344	50.0236	16.4314	24.3837	13.3084	23.73
1348	L1120 (m/z=417.775577; rt=6.63005)	9.8373	6.81346	14.537	11.0435	6.42014	9.72974	15.3408	9.39844	15.4875	12.7454	15.2584	17.0847	25.1466	43.0547	20.508	25.8865	19.0549	22.6531
1349	L1132 (m/z=571.475714; rt=6.64163)	6.57429	5.7753	9.3372	9.60272	6.72256	11.2049	13.107	7.46288	10.6544	11.0703	12.8971	13.9264	27.9851	46.4689	16.9194	31.6606	20.6733	37.9578
1350	L1139 (m/z=571.475379; rt=6.64443)	6.57429	5.7753	9.3372	9.60272	6.72256	11.2049	13.107	7.46288	10.6544	11.0703	12.8971	13.9264	27.9851	46.4689	16.9194	31.6606	20.6733	37.9578
1351	L1130 (m/z=571.462314; rt=6.64095)	6.78889	5.98814	9.51899	9.92552	6.91901	11.7858	13.7379	7.93092	11.0452	11.5989	12.1367	13.7728	27.8493	47.0028	16.7863	30.0995	20.0224	37.0909
1352	L1140 (m/z=982.602641; rt=6.64963)	23.8952	22.6294	28.0097	15.7996	17.2831	17.2102	15.4846	14.3431	17.4583	13.2646	14.1314	13.1919	16.1084	14.2415	13.6635	15.4476	17.3714	10.4665
1353	L1142 (m/z=982.657666; rt=6.65225)	22.0435	24.0204	25.9229	14.7675	16.7375	15.7232	17.3537	14.4856	17.556	12.841	16.8402	14.0106	16.512	15.0616	12.9208	16.4823	12.8547	13.8664
1354	L1143 (m/z=983.661664; rt=6.65238)	20.1571	21.4753	25.2029	14.8922	15.0864	15.0561	14.9989	14.4494	17.0442	13.2933	16.8049	14.24	17.3575	15.8937	15.7319	19.3011	16.2903	12.7248
1355	L1141 (m/z=983.629342; rt=6.65115)	20.754	21.1611	25.2699	15.7031	16.1273	15.8967	14.4856	15.1177	17.3213	13.61	17.1819	14.024	16.9051	16.1237	15.8	18.5423	14.2882	11.6881
1356	L1144 (m/z=335.259775; rt=6.6527)	13.0462	16.1459	15.5277	12.5333	18.6009	14.7598	15.2108	14.693	18.0147	13.1097	24.6518	17.1362	23.3585	12.5079	14.7057	22.7415	13.4006	19.8559
1357	L1164 (m/z=954.620615; rt=6.65428)	7.09584	11.0736	11.5639	7.70248	9.38403	7.34168	12.3577	11.5183	13.5708	8.61792	16.5867	15.8677	19.1651	18.7531	18.0202	45.061	32.6843	33.6359
1358	L1159 (m/z=955.624378; rt=6.65422)	7.10133	11.0136	11.5989	8.14168	9.68363	7.45188	12.6024	11.589	13.6236	8.79324	16.6099	16.1029	19.2945	18.7972	17.8095	44.0669	32.3068	33.4132
1359	L1153 (m/z=956.628268; rt=6.65413)	7.16229	10.9705	11.6847	7.81439	9.55944	7.37877	12.6777	11.4485	13.7751	8.97192	16.6044	16.1627	19.329	19.0287	17.7343	44.0447	32.3885	33.2645
1360	L1170 (m/z=477.312104; rt=6.65436)	7.36623	10.8398	11.2777	7.975	9.38553	7.33723	12.3925	11.5012	13.6704	9.04267	16.9297	16.0686	19.1343	18.7999	18.0537	44.0892	32.5438	33.5924
1361	L1163 (m/z=955.547955; rt=6.65426)	7.04096	10.4897	10.7591	8.26019	9.72557	7.41116	12.9341	11.7222	13.4804	8.85473	16.8286	16.5256	19.4917	18.6949	18.0869	43.4183	32.5389	33.7369
1362	L1168 (m/z=477.813874; rt=6.6543)	7.40497	10.9972	11.4011	8.27633	9.83303	7.5807	12.8009	11.6697	13.7437	9.15082	16.9656	16.1975	19.1593	18.7993	17.7991	43.2077	31.7352	33.2778
1363	L1166 (m/z=318.212707; rt=6.65429)	7.11016	11.1149	11.5338	7.77459	9.45441	7.33509	12.6571	11.5337	13.7164	8.72039	16.7482	16.0509	19.4269	18.6339	17.933	44.3109	32.5149	33.4308
1364	L1147 (m/z=957.632448; rt=6.65385)	7.48643	11.6851	11.5073	8.00361	9.8009	7.77244	12.4217	11.6094	14.208	8.62491	16.6621	16.4828	19.013	18.4539	17.2933	44.4504	31.7887	32.7361
1365	L1165 (m/z=477.294143; rt=6.65429)	7.86271	10.4727	10.9531	8.65296	10.0934	7.94417	13.4654	12.1138	13.7366	9.98471	17.2955	16.2798	20.1569	19.1715	18.1968	39.8773	30.8531	32.8895
1366	L1157 (m/z=318.54716; rt=6.65419)	7.20302	11.0406	11.8053	8.34788	9.57225	7.50385	12.7524	11.6642	13.6713	8.81757	16.812	16.1552	19.4762	19.2482	17.9332	43.4029	31.6628	32.9312
1367	L1161 (m/z=613.486972; rt=6.65426)	6.93393	11.8625	12.204	7.42711	9.60004	7.73547	12.6889	12.0634	14.1796	7.90325	17.2102	16.3223	19.0381	19.1216	17.8641	46.0087	30.1423	31.6946
1368	L1162 (m/z=613.47575; rt=6.65426)	7.20032	11.8765	12.3809	7.7481	9.74232	7.99643	13.0142	12.1689	14.0591	8.19198	17.2008	16.174	19.0686	19.1532	17.8741	44.7768	29.8583	31.5155
1369	L1155 (m/z=478.312301; rt=6.65417)	7.26498	10.9377	11.7689	7.60271	9.59955	7.20037	12.7507	11.4943	13.9	8.87867	17.1549	16.4428	19.6209	19.3345	17.8915	43.8821	31.4791	32.7964
1370	L1158 (m/z=478.31839; rt=6.65421)	7.26498	10.9377	11.7689	7.60271	9.59955	7.20037	12.7507	11.4943	13.9	8.87867	17.1549	16.4428	19.6209	19.3345	17.8915	43.8821	31.4791	32.7964
1371	L1152 (m/z=957.571032; rt=6.65409)	8.2716	11.081	11.7808	8.45226	10.4518	8.10477	13.5246	12.1013	13.8951	9.51145	16.1048	16.1579	19.0839	19.1885	17.3498	41.1562	31.0726	32.7116
1372	L1149 (m/z=318.539822; rt=6.65397)	8.22016	10.4262	10.4991	9.66072	9.72057	8.19214	13.7115	12.0092	12.8312	9.77068	16.237	15.9198	18.8225	18.9993	18.1828	39.8144	32.6077	34.375
1373	L1167 (m/z=318.202661; rt=6.6543)	8.22435	10.4017	10.3748	8.49088	10.6993	8.22402	13.9166	12.5302	13.3738	9.85048	16.3183	16.5378	20.5197	18.4928	18.3461	38.998	31.5578	33.1436
1374	L1156 (m/z=614.492777; rt=6.65418)	6.70719	11.8341	12.9045	7.98016	9.48647	7.67026	12.1214	11.9396	13.7779	8.12619	17.4185	16.3326	19.4677	17.9568	17.638	45.5974	31.3645	31.6766
1375	L1160 (m/z=614.480477; rt=6.65424)	6.77286	11.8533	12.8938	8.39663	9.76371	7.79445	12.4419	11.9992	13.6966	8.41279	17.3855	16.3497	19.6948	17.8932	17.6442	44.2811	31.1051	31.6213
1376	L1145 (m/z=958.634896; rt=6.65361)	7.36869	11.1085	12.2079	8.41893	9.53646	7.69702	13.3263	11.6471	14.1522	8.77205	16.4136	16.3154	17.8841	19.837	17.8391	44.2299	31.4573	31.7884
1377	L1146 (m/z=318.879084; rt=6.65381)	7.00791	10.7196	11.622	7.65388	9.78297	7.76238	12.4896	11.5363	13.5946	8.26625	16.1448	15.724	20.1034	19.1884	17.9041	44.4789	32.6279	33.3929
1378	L1148 (m/z=318.882072; rt=6.65394)	6.74356	10.6378	11.5778	7.36516	9.5276	7.31679	12.0185	11.2617	13.807	7.95443	16.4225	15.9546	19.7789	19.3946	18.022	46.1394	32.7557	33.3218
1379	L1169 (m/z=477.791605; rt=6.65434)	6.69114	9.59551	9.71933	8.13093	10.2396	7.02105	13.3444	11.4248	13.5609	9.43658	17.4459	16.7973	19.634	18.2528	18.2036	42.763	33.0414	34.6978
1380	L1150 (m/z=238.660198; rt=6.654)	8.26743	10.715	11.7919	6.67994	9.41565	7.7502	12.309	11.4088	12.6129	7.1626	15.7615	15.1336	18.7862	18.8303	17.1854	46.7947	33.8687	35.526
1381	L1151 (m/z=478.821194; rt=6.65409)	8.12987	11.0259	10.9592	6.28283	9.32364	7.08217	12.5594	11.5651	14.1152	8.20285	16.9551	16.7628	19.4773	18.2671	17.3928	45.3478	32.8632	33.6879
1382	L1154 (m/z=478.815841; rt=6.65414)	8.12987	11.0259	10.9592	6.28283	9.32364	7.08217	12.5594	11.5651	14.1152	8.20285	16.9551	16.7628	19.4773	18.2671	17.3928	45.3478	32.8632	33.6879
1383	L1171 (m/z=238.655423; rt=6.65462)	8.27801	9.99517	9.70131	7.36983	9.44894	6.4474	11.9452	11.0951	15.0148	9.07224	18.8304	16.8708	19.9426	19.9018	17.6752	43.3922	30.7286	34.2904
1384	L1203 (m/z=800.525016; rt=6.6748)	22.8984	27.7392	26.377	22.2093	22.4043	23.4216	20.5895	22.0789	20.0718	11.3728	14.6872	14.9055	14.811	9.4964	9.87407	8.11896	3.59399	5.35009
1385	L1172 (m/z=801.537908; rt=6.65826)	22.2945	24.031	27.4713	18.3356	21.1813	20.5494	17.2768	17.537	18.42	12.5001	16.2194	13.8224	18.0683	10.1681	9.80965	11.5246	10.8632	9.92723
1386	L1173 (m/z=391.288442; rt=6.65877)	17.3153	16.9339	13.885	17.9082	19.3803	16.9597	18.8099	12.6477	17.8905	19.0423	13.4054	20.2778	13.5963	16.1161	20.0877	13.3281	21.5166	10.8994
1387	L1174 (m/z=391.283388; rt=6.65946)	17.5168	16.9074	13.4097	18.1166	19.9478	17.985	19.0288	12.6367	16.1291	19.2639	13.798	20.3346	12.9021	16.588	20.5833	13.1717	20.1222	11.5583
1388	L1177 (m/z=959.582032; rt=6.66037)	14.2657	18.5328	14.7773	16.5404	21.0209	19.7852	20.6622	20.7489	21.0566	18.3326	18.8655	19.2183	18.9102	11.8221	18.192	11.2889	9.00977	6.97065
1389	L1180 (m/z=959.563178; rt=6.66078)	14.2657	18.5328	14.7773	16.5404	21.0209	19.7852	20.6622	20.7489	21.0566	18.3326	18.8655	19.2183	18.9102	11.8221	18.192	11.2889	9.00977	6.97065
1390	L1175 (m/z=960.585945; rt=6.65986)	14.1705	18.9012	15.9018	16.7129	21.8183	20.344	20.3656	21.097	20.4128	19.2828	17.0614	18.9539	18.7077	12.5195	17.6179	10.7605	8.60267	6.7697
1391	L1176 (m/z=960.567523; rt=6.66019)	14.1705	18.9012	15.9018	16.7129	21.8183	20.344	20.3656	21.097	20.4128	19.2828	17.0614	18.9539	18.7077	12.5195	17.6179	10.7605	8.60267	6.7697
1392	L1179 (m/z=961.584171; rt=6.66074)	12.5535	19.2134	15.3185	17.2449	19.9448	19.1393	20.6942	20.0235	21.2501	16.7964	17.2392	18.5395	19.4135	13.8262	17.161	13.2974	9.75302	8.5916
1393	L1181 (m/z=479.789854; rt=6.66109)	13.385	17.1232	13.5022	15.5297	20.2527	17.7845	21.3874	20.1905	19.8204	18.003	18.8896	18.3354	19.6269	12.3951	17.996	12.068	11.1489	12.5616
1394	L1178 (m/z=975.551241; rt=6.66073)	15.6113	19.01	17.3995	16.0037	20.5508	19.5753	20.8371	20.0024	19.4445	17.5697	18.9678	16.1087	16.9255	11.7526	15.5227	13.0527	9.71632	11.9494
1395	L1192 (m/z=778.543084; rt=6.66672)	14.1192	21.2767	24.6354	13.1485	14.0001	11.8861	16.5357	14.2476	16.5687	6.96307	16.2288	14.7428	17.2843	17.1919	11.8438	31.9492	17.0548	20.3232
1396	L1188 (m/z=779.547799; rt=6.66657)	13.9498	20.6567	24.3781	13.0664	14.1771	11.7774	16.4764	14.3643	16.6931	6.61154	16.3021	14.7936	17.3116	17.3875	11.8518	32.5842	17.1123	20.506
1397	L1198 (m/z=779.503425; rt=6.66719)	15.1363	21.3607	25.1176	14.3147	15.0921	12.4905	17.1258	15.1	16.7527	7.05442	15.5348	14.3372	17.3613	16.8077	11.479	29.0075	16.1047	19.8231
1398	L1186 (m/z=780.5503; rt=6.66651)	14.4393	20.631	24.5148	12.7581	14.1423	11.5659	15.9911	14.7156	16.8188	7.05696	16.4324	14.6632	17.5486	17.0417	11.8083	32.2058	17.037	20.6289
1399	L1196 (m/z=389.272583; rt=6.66701)	14.3374	21.4209	25.1669	13.4471	14.0259	11.9476	16.7475	14.1733	16.4266	7.02466	16.198	14.6311	17.618	17.1972	11.7124	30.8253	16.9847	20.1154
1400	L1195 (m/z=778.486081; rt=6.66698)	14.3235	22.2294	25.1668	13.14	14.2422	12.1249	17.3268	14.6429	17.2325	6.63732	15.8655	14.8686	17.8651	16.9934	11.3201	30.7074	16.0266	19.2871
1401	L1197 (m/z=780.521316; rt=6.66708)	15.3383	20.6333	24.3677	13.2384	14.8823	12.3454	16.5308	15.0959	16.8532	7.16791	16.1694	14.6876	17.5386	16.8222	11.8085	30.186	16.3968	19.9376
1402	L1189 (m/z=389.777037; rt=6.66658)	14.2485	21.3751	25.4938	13.6692	14.4974	12.1537	16.8619	14.7251	16.5213	7.11769	15.9426	14.6135	17.3262	17.2308	11.5645	30.7765	16.229	19.6533
1403	L1199 (m/z=389.771084; rt=6.66741)	14.2485	21.3751	25.4938	13.6692	14.4974	12.1537	16.8619	14.7251	16.5213	7.11769	15.9426	14.6135	17.3262	17.2308	11.5645	30.7765	16.229	19.6533
1404	L1193 (m/z=259.518178; rt=6.66678)	14.1974	21.3352	24.8408	13.0898	13.9146	11.6621	16.3685	14.0149	16.8303	6.57955	16.2737	14.798	17.0964	17.3285	11.8697	32.6682	17.1331	19.9991
1405	L1183 (m/z=781.558023; rt=6.66622)	12.6504	19.9536	24.8105	10.388	13.7178	11.4766	13.7156	14.1976	16.4726	20.2251	16.8045	14.4405	14.8139	18.8635	12.3204	28.207	16.463	20.4793
1406	L1184 (m/z=781.553483; rt=6.6663)	12.6504	19.9536	24.8105	10.388	13.7178	11.4766	13.7156	14.1976	16.4726	20.2251	16.8045	14.4405	14.8139	18.8635	12.3204	28.207	16.463	20.4793
1407	L1187 (m/z=781.538822; rt=6.66656)	13.1464	20.118	24.9368	10.6301	14.1518	11.9614	14.2532	14.429	16.6478	19.6408	16.5448	14.3732	14.6859	18.6623	12.4263	27.6436	16.0941	19.6545
1408	L1185 (m/z=259.852965; rt=6.66638)	11.9814	20.8931	24.3964	11.0316	14.2409	11.8748	14.7362	14.4136	16.4246	19.8521	15.9577	14.6345	14.5319	17.2702	11.7992	27.8667	17.2244	20.8706
1409	L1201 (m/z=259.513083; rt=6.66829)	16.6647	23.1586	26.7054	14.7444	15.7413	13.4214	17.5476	15.2409	16.9735	7.1733	15.3474	14.1764	16.4158	16.1451	10.5222	27.4542	14.3668	18.2012
1410	L1202 (m/z=389.258901; rt=6.66929)	17.2328	24.4079	28.7122	15.2275	16.0748	13.9541	17.6054	15.1926	16.6236	7.4799	15.2731	13.7539	16.7535	16.1344	10.2849	25.7008	12.9172	16.6714
1411	L1200 (m/z=259.84981; rt=6.66783)	15.2468	21.9588	25.7618	14.3922	15.4587	12.8915	18.4232	15.268	16.5334	6.32062	14.9811	13.8858	17.3782	16.5666	11.3712	28.239	15.7667	19.5564
1412	L1190 (m/z=390.276215; rt=6.66658)	13.708	20.8144	25.9959	12.7526	14.5819	11.9535	16.1902	14.8204	16.3245	9.85278	15.9875	14.267	17.5494	17.2186	11.0758	29.9471	16.5773	20.3833
1413	L1194 (m/z=390.274682; rt=6.66682)	13.708	20.8144	25.9959	12.7526	14.5819	11.9535	16.1902	14.8204	16.3245	9.85278	15.9875	14.267	17.5494	17.2186	11.0758	29.9471	16.5773	20.3833
1414	L1182 (m/z=390.280436; rt=6.66596)	12.8039	20.7832	25.6186	12.5003	13.9875	11.4699	15.7868	14.6305	16.3171	9.77744	16.2102	14.57	18.1595	17.4095	11.2059	30.972	16.9791	20.8186
1415	L1191 (m/z=781.514124; rt=6.66662)	17.1849	20.2013	24.7046	12.1133	14.5392	12.222	16.0102	14.893	17.6426	10.3871	15.7927	14.2015	15.5362	18.0644	12.684	28.7682	16.5095	18.5453
1416	L1204 (m/z=778.615095; rt=6.68098)	19.6765	22.7363	27.5721	20.049	12.6163	10.3096	20.0593	12.4069	15.9882	7.61867	15.5633	14.726	11.8811	17.192	11.434	20.7154	19.4852	19.9699
1417	L1205 (m/z=777.523619; rt=6.69581)	21.0954	16.4338	23.6514	19.4964	15.7519	14.437	18.9112	16.111	15.6098	11.0411	16.6059	14.3204	12.7128	17.5544	10.8738	16.7432	17.543	21.1075
1418	L1209 (m/z=776.584556; rt=6.69969)	19.4291	19.7767	26.4639	21.574	16.89	15.9928	19.4206	15.8341	17.7646	8.55498	17.0816	17.2168	12.8452	17.5794	11.2811	18.176	12.8382	11.2808
1419	L1207 (m/z=777.588171; rt=6.69893)	20.6966	19.078	26.4917	20.817	16.8974	16.2404	18.2127	16.5026	17.2433	8.67891	16.4974	16.5987	13.3742	18.5282	12.152	18.2206	12.4965	11.2739
1420	L1210 (m/z=776.539221; rt=6.69982)	19.422	20.218	26.5303	21.7432	17.2386	17.0189	19.5036	17.2752	19.4402	10.1685	16.7732	16.7366	13.5774	16.7387	10.9494	15.5853	11.7563	9.3246
1421	L1208 (m/z=388.293339; rt=6.69962)	19.6162	17.5598	25.2546	20.5655	18.0377	18.2026	19.3757	17.4102	17.4701	8.83011	17.7078	16.6459	13.897	17.7625	11.6634	17.7155	11.5221	10.7635
1422	L1206 (m/z=388.794852; rt=6.69782)	19.6683	19.2002	27.4895	20.2716	17.6567	16.3119	18.1522	17.2871	19.0575	12.4893	16.6101	15.9015	13.5617	17.7841	11.0287	15.857	11.4618	10.2109
1423	L1211 (m/z=788.59064; rt=6.72186)	10.0911	7.69938	5.95097	10.809	8.00406	6.73653	7.26129	7.10718	5.42499	4.74734	8.61869	5.7079	8.166	11.2939	4.17831	58.9253	57.2768	72.0013
1424	L1212 (m/z=950.648958; rt=6.73448)	14.7052	10.1704	9.1353	13.7077	14.448	8.21069	13.4801	15.7653	8.896	10.1139	10.6908	10.2463	12.7269	12.0239	8.74571	35.2662	36.9016	54.766
1425	L1220 (m/z=792.528373; rt=6.77736)	3.24792	3.1468	2.96077	3.43104	2.78048	1.52473	4.85719	4.07241	4.39732	3.86081	7.90715	5.78373	11.7665	11.8828	8.39653	72.8365	70.2103	76.9369
1426	L1221 (m/z=792.50856; rt=6.7775)	3.26238	3.04206	3.16052	3.30138	3.34357	1.87296	5.41196	4.88325	4.50024	3.83047	7.93955	6.22325	12.0114	12.3133	8.81743	72.1824	68.4783	75.4256
1427	L1213 (m/z=764.532429; rt=6.77155)	2.36389	3.89766	2.57918	2.83314	2.88313	1.20401	4.03565	3.16068	3.16849	2.42178	4.92788	3.51589	8.03869	9.49482	5.29165	80.3068	75.6358	84.2408
1428	L1218 (m/z=769.494289; rt=6.77677)	8.19236	7.66417	9.47749	6.94751	5.4246	4.65311	5.39171	6.04544	10.4591	6.41352	12.5226	11.637	14.9622	22.5321	17.1765	58.0927	45.8111	46.5968
1429	L1219 (m/z=769.48906; rt=6.77689)	8.19236	7.66417	9.47749	6.94751	5.4246	4.65311	5.39171	6.04544	10.4591	6.41352	12.5226	11.637	14.9622	22.5321	17.1765	58.0927	45.8111	46.5968
1430	L1214 (m/z=765.536437; rt=6.77162)	2.04909	3.42961	2.49429	2.65274	2.51896	1.19884	4.17383	3.33705	2.52362	2.59573	6.73072	4.30627	8.20427	12.3411	5.14124	80.3243	71.6426	84.3357
1431	L1215 (m/z=765.536849; rt=6.77162)	2.04909	3.42961	2.49429	2.65274	2.51896	1.19884	4.17383	3.33705	2.52362	2.59573	6.73072	4.30627	8.20427	12.3411	5.14124	80.3243	71.6426	84.3357
1432	L1216 (m/z=764.487676; rt=6.77247)	6.36396	3.79656	2.73561	4.95885	2.95474	1.45649	4.0336	3.05902	3.41863	6.78984	6.70272	4.082	7.67548	10.7622	5.34686	70.1783	72.7247	82.9604
1433	L1217 (m/z=769.524515; rt=6.77556)	11.7032	12.1577	14.3944	0.942226	4.99355	5.02627	9.64449	11.5906	10.1112	9.50856	9.38441	12.0255	21.7487	21.1422	15.344	46.4528	40.7315	43.0987
1434	L1226 (m/z=774.5685; rt=6.79914)	25.7276	23.7137	27.0872	23.0857	17.4311	12.3806	19.7313	17.848	15.7634	7.00977	15.5329	12.3536	9.72889	11.6146	9.8848	14.7166	13.8596	22.5304
1435	L1225 (m/z=775.572513; rt=6.79827)	25.7474	23.4978	25.1222	22.4355	18.5084	14.6164	18.5667	16.3123	17.5193	7.0989	14.5259	12.643	10.7711	13.1576	8.91247	15.3803	13.9981	21.1867
1436	L1223 (m/z=774.532356; rt=6.7834)	28.1467	25.2022	30.1484	24.0184	19.816	15.7969	17.9952	17.4566	16.0154	6.48963	14.0381	11.3546	11.2646	13.4138	8.10169	12.0854	10.0732	18.583
1437	L1222 (m/z=775.537098; rt=6.7827)	25.0379	24.3452	27.3908	21.7076	20.5524	16.3211	20.9741	15.8721	15.9712	9.16358	13.9749	15.5857	9.06798	15.4881	7.97824	14.0488	9.76723	16.753
1438	L1224 (m/z=387.284815; rt=6.79793)	22.9844	23.5681	27.544	16.0837	17.1734	11.281	16.5034	18.3101	15.0459	10.9547	15.4075	12.7868	18.221	11.8542	10.7609	15.2529	13.6868	22.5814
1439	L1227 (m/z=925.495914; rt=6.81461)	9.04818	12.4447	13.8878	10.4594	8.38305	7.84377	12.9128	11.2503	15.2014	11.8506	23.7471	22.385	23.3536	12.0509	20.1361	32.3753	32.124	20.546
1440	L1228 (m/z=925.539202; rt=6.81597)	10.6177	14.6901	13.7848	10.7211	9.30493	7.21393	14.5671	14.1669	14.9833	13.1539	26.5445	22.3134	25.2423	10.4435	18.8096	25.698	24.8499	22.8949
1441	L1229 (m/z=802.59111; rt=6.85467)	20.1252	20.39	25.9202	18.5599	15.475	14.0756	23.3474	15.0356	17.4154	10.2912	16.2265	16.7944	10.5715	16.6423	10.7295	17.1048	16.2306	15.0648
1442	L1230 (m/z=802.539836; rt=6.88223)	13.8904	18.5097	20.3759	14.8007	14.0479	11.0648	13.6791	13.6491	13.6903	5.24967	12.9417	12.9642	5.23595	10.1337	8.4345	47.1441	30.7178	33.4703
1443	L1233 (m/z=954.619067; rt=6.89941)	4.30984	5.81211	6.25279	4.9418	4.59154	3.08504	6.62239	6.44961	5.72052	4.40911	10.9315	9.24461	12.948	18.646	10.0681	66.7689	53.5692	65.629
1444	L1232 (m/z=955.622607; rt=6.89929)	3.79421	6.12172	6.51906	5.84756	3.90107	2.49082	6.48756	5.31721	6.89713	6.183	11.9749	8.3107	13.401	19.4546	11.1293	64.2867	53.2305	64.653
1445	L1231 (m/z=955.575801; rt=6.89801)	5.11117	6.07845	6.46706	7.09743	4.32879	3.60493	7.66939	5.59476	6.92092	11.2978	12.8815	9.67825	13.5896	17.8368	11.2202	55.2346	53.2797	62.1087
1446	L1234 (m/z=778.545388; rt=6.90841)	17.2129	15.3515	15.8766	15.8297	9.43215	8.56249	10.6676	13.4454	10.3195	6.87268	10.2545	14.2288	14.5767	17.8063	6.91399	34.8404	33.7102	44.0986
1447	L1237 (m/z=762.53198; rt=6.93721)	6.22394	4.56352	7.74318	6.50339	4.07765	4.9163	8.50032	4.5998	5.91592	7.60172	8.25272	8.19901	21.7081	43.32	10.0276	49.4625	35.1864	63.198
1448	L1235 (m/z=763.535252; rt=6.93714)	6.73677	5.02924	8.2803	6.90369	3.97613	5.01959	8.6106	4.72139	6.19707	7.55	8.56706	8.70202	22.0089	43.398	10.2548	48.19	34.3082	61.5462
1449	L1238 (m/z=762.499191; rt=6.93733)	6.29149	4.82775	8.25803	6.49501	3.96113	5.05219	8.61735	4.64469	6.04476	7.67377	8.49519	8.91958	23.0037	44.7123	10.7392	47.9186	33.3589	60.9863
1450	L1236 (m/z=763.501222; rt=6.93718)	6.1145	4.8269	8.49884	7.32869	4.21587	5.18597	8.43628	4.64323	6.23446	7.87575	8.52202	9.09303	22.4816	44.5029	10.6441	47.7632	33.2891	60.3436
1451	L1240 (m/z=774.509065; rt=6.95421)	8.28808	7.19635	10.9694	7.73701	6.31485	5.13137	6.53566	5.1096	7.89082	4.86334	10.4587	10.9378	15.0901	11.2883	14.8501	57.4858	59.6321	50.2205
1452	L1239 (m/z=775.513288; rt=6.95372)	6.9454	6.27815	8.94393	7.32765	6.2823	4.46582	7.42191	6.12192	8.83768	5.15819	10.727	12.6992	15.3204	11.3361	15.765	57.8265	59.2544	49.2883
1453	L1244 (m/z=927.555664; rt=6.99432)	3.26502	5.5316	6.36136	4.28269	4.37694	1.85198	3.35494	3.35181	5.92237	4.12451	10.9436	12.606	13.2212	6.26457	14.0675	71.7516	69.5315	59.1908
1454	L1243 (m/z=927.531455; rt=6.99409)	3.46213	5.78562	6.39518	4.49487	4.44563	1.72193	3.47569	3.48981	6.12984	4.31982	11.3796	13.1649	13.5365	5.35049	14.5072	70.711	69.5489	58.0809
1455	L1241 (m/z=774.552902; rt=6.95889)	15.1037	12.6716	19.1317	14.2439	11.5015	8.93301	9.6647	8.67285	11.5021	4.32953	8.95334	9.35849	11.4879	12.2953	11.3822	45.1703	45.9055	39.6924
1456	L1242 (m/z=775.555999; rt=6.95891)	13.0216	11.8026	17.4611	12.8171	11.8947	8.31092	11.3981	6.16161	10.73	7.02984	8.94699	10.4507	11.5347	13.3602	11.3796	44.1987	47.8339	41.6678
1457	L1245 (m/z=800.584798; rt=7.00222)	23.7981	20.1796	27.9539	19.8419	15.5785	12.9778	19.5179	16.9682	19.3523	9.46413	15.248	15.3231	11.5753	16.1963	7.7875	15.8028	15.8295	16.6054
1458	L1253 (m/z=930.62153; rt=7.11744)	6.98201	7.75198	6.17478	6.20954	6.50102	4.21952	10.1793	6.25846	6.00436	7.01444	10.8401	8.04215	13.7357	16.5538	9.33838	55.879	52.0947	66.2208
1459	L1252 (m/z=930.587317; rt=7.11533)	7.37709	7.77022	7.92768	6.14433	6.19431	4.37143	11.1367	8.89321	5.98786	7.04998	10.5488	8.17367	11.0826	16.7299	10.0417	57.2093	49.8636	63.4976
1460	L1246 (m/z=909.540923; rt=7.05822)	4.63251	5.98223	5.8338	6.07295	5.80064	2.77703	6.85475	5.4536	7.06419	6.23639	14.2792	9.46098	16.1174	9.46259	11.1279	60.086	59.0218	63.7361
1461	L1247 (m/z=909.506928; rt=7.05835)	4.27183	5.8056	5.86447	6.41577	6.10253	2.83533	6.81809	5.50349	7.66854	5.95629	15.5027	11.017	17.7907	9.42323	11.8652	58.7473	57.6624	60.7495
1462	L1248 (m/z=801.526373; rt=7.06467)	15.6012	20.9708	12.0497	15.6768	12.8825	10.6471	10.0694	10.609	9.74487	10.8212	9.40623	10.1684	19.6549	12.7435	11.6681	28.1766	33.388	45.7218
1463	L1249 (m/z=800.508321; rt=7.07151)	17.0095	14.3579	14.9632	13.8534	10.4092	8.42164	15.722	11.6394	11.3488	13.4724	9.54398	9.98998	13.1675	18.9122	11.3203	26.7752	35.1372	43.9561
1464	L1250 (m/z=728.525673; rt=7.09921)	17.3293	21.6757	24.8168	16.4115	15.839	13.044	19.2372	13.9939	13.9544	8.62405	15.3973	13.6972	12.3668	16.5703	8.84605	26.0312	16.5238	25.6415
1465	L1254 (m/z=802.600881; rt=7.1232)	18.0221	16.3336	19.9159	14.8876	17.4362	11.2591	15.2978	13.6806	15.2116	12.8027	16.9057	12.7811	12.7681	16.4313	10.1659	26.2218	19.2125	30.6664
1466	L1251 (m/z=802.571392; rt=7.11509)	19.6015	15.8598	20.0237	15.5934	16.7745	11.4043	15.1686	13.0569	15.2579	11.1548	17.0848	12.8019	14.4807	16.7283	9.4772	24.001	20.4957	31.0351
1467	L1255 (m/z=803.603809; rt=7.12631)	18.8425	17.1741	20.2976	16.6504	13.4065	13.36	14.7327	13.5303	14.3605	11.8533	16.3735	15.0369	16.7311	17.3408	12.942	21.19	22.1749	24.0031
1468	L1265 (m/z=732.565721; rt=7.16426)	26.6056	26.5168	30.0447	22.225	17.2416	12.5549	17.5131	14.6007	18.4106	6.15043	15.1888	12.512	9.0425	11.9725	8.83161	18.4634	14.4795	17.6461
1469	L1264 (m/z=732.539379; rt=7.16414)	26.7446	26.9935	30.6016	22.2677	17.5292	12.5901	17.7509	14.5634	18.6898	6.1934	15.3192	12.5796	9.12792	11.7923	8.86375	17.9155	13.8024	16.6752
1470	L1262 (m/z=733.569331; rt=7.16409)	26.1188	26.3936	29.5848	22.2137	17.1683	12.4612	17.3883	14.7189	18.1057	6.38072	15.1282	12.8794	9.3365	11.9519	9.32833	18.562	14.6391	17.6406
1471	L1257 (m/z=733.542083; rt=7.16388)	26.4003	26.865	29.7393	22.5952	17.3402	12.7918	17.4573	14.7037	18.2866	6.44711	15.2465	12.9074	9.14117	11.8604	9.30922	17.9589	13.9842	16.9656
1472	L1266 (m/z=366.281817; rt=7.16428)	25.7109	27.0225	30.4282	21.0884	17.6478	12.7041	16.7895	14.6696	18.6767	11.152	15.3995	12.5396	8.28447	11.4688	8.73454	16.9747	13.7919	16.917
1473	L1267 (m/z=366.287217; rt=7.16443)	25.5144	26.8687	30.123	20.9466	17.5625	12.5556	16.6293	14.5239	18.5069	11.083	15.3478	12.41	8.41755	11.4487	8.76291	17.4092	14.2484	17.6415
1474	L1261 (m/z=734.571623; rt=7.16406)	26.7302	25.7245	29.5168	21.8121	18.2611	12.785	17.8447	14.2826	18.9492	5.71341	15.386	11.9058	9.4263	11.4274	8.71098	18.4733	14.9184	18.1321
1475	L1288 (m/z=858.670239; rt=7.23033)	22.8086	20.7553	26.5873	20.4084	17.3854	12.7675	17.1738	17.1036	19.2488	8.86912	13.3549	15.3875	13.092	14.4099	10.4112	17.648	16.9909	15.5975
1476	L1259 (m/z=734.558029; rt=7.16398)	26.7177	25.8471	29.6766	21.8723	18.6332	12.8138	17.8807	14.3665	18.9732	5.83724	15.2682	12.0177	9.39411	11.4436	8.86669	18.2979	14.4413	17.652
1477	L1263 (m/z=366.78838; rt=7.16412)	26.7813	26.6101	30.814	23.0264	17.4342	12.1796	17.4258	15.4135	17.8138	5.79101	13.9945	12.3849	8.84733	11.7698	9.10583	18.1282	14.7778	17.7018
1478	L1256 (m/z=749.592436; rt=7.16143)	23.676	24.8103	27.7419	20.1381	16.9322	11.8011	17.3095	15.4518	17.1313	8.27625	14.9691	13.5299	11.2146	13.5332	10.4756	19.3857	14.3034	19.3202
1479	L1260 (m/z=366.78349; rt=7.16401)	26.5854	26.6304	30.6526	23.1146	17.3272	12.1158	17.4025	15.3189	18.0362	5.93013	14.3388	12.3982	9.01415	11.6976	9.18808	17.9532	14.687	17.6091
1480	L1286 (m/z=859.673817; rt=7.22245)	20.4954	22.7394	24.4642	20.6187	17.5296	14.8848	16.4505	14.8162	20.4801	10.5135	16.8872	14.6202	10.9615	11.8062	10.5783	20.9602	16.2214	14.9725
1481	L1258 (m/z=244.191717; rt=7.16393)	26.7698	27.4861	30.7267	20.9519	17.0072	12.7316	17.4345	14.1254	18.4641	7.51768	14.8946	11.8349	8.78588	11.801	7.9606	18.5403	14.6857	18.2821
1482	L1268 (m/z=570.511571; rt=7.16476)	25.0499	27.6026	31.9353	19.7916	18.1313	11.7566	18.1592	14.0831	19.0637	8.55053	13.6057	11.2867	10.7872	11.4428	9.02724	17.6616	15.1347	16.9305
1483	L1270 (m/z=754.546397; rt=7.18767)	18.6386	20.8804	23.76	19.3392	15.1602	12.181	15.7903	14.1641	15.9425	8.88893	14.9797	12.1039	12.8886	15.0682	10.3482	24.4544	19.7473	25.6644
1484	L1282 (m/z=754.524979; rt=7.19011)	17.5687	20.9132	23.9112	18.7921	15.1228	11.9018	15.4516	14.1955	16.1296	9.44238	15.021	12.3819	13.4075	15.3593	10.3345	25.3377	19.3882	25.3411
1485	L1269 (m/z=755.551654; rt=7.1874)	19.0804	20.5983	23.0516	16.6804	16.0227	12.0163	17.1421	12.5796	15.6199	8.53006	15.527	12.8087	14.3391	16.4991	9.47318	24.228	18.7732	27.0304
1486	L1278 (m/z=755.53193; rt=7.1899)	18.7883	20.8883	23.3081	16.0156	16.0796	11.8022	17.1112	12.6454	15.815	8.30312	15.4847	13.0417	14.9222	16.9484	9.6954	24.8595	17.9536	26.3376
1487	L1274 (m/z=766.549827; rt=7.18897)	3.48846	4.8805	4.35009	3.64832	3.61726	1.99239	5.7079	4.48138	5.09204	3.79064	8.4176	6.22396	11.4972	14.7834	8.58067	71.8674	63.8198	73.7608
1488	L1271 (m/z=767.553517; rt=7.18875)	3.0775	5.12807	4.50291	3.62853	3.71014	2.02582	5.97596	4.56462	5.09814	3.73758	8.33674	6.1846	11.9607	14.826	8.64569	71.6198	63.4345	73.5428
1489	L1279 (m/z=771.509089; rt=7.18994)	5.36632	9.11429	9.71755	6.73746	7.72719	5.32097	11.8731	9.63873	12.4061	6.92582	15.2331	16.4774	17.7967	21.985	19.7303	51.3006	36.3016	36.3476
1490	L1277 (m/z=771.489636; rt=7.18987)	5.48802	9.32953	9.89648	6.80674	7.80716	5.51903	12.0907	9.8258	12.7106	7.12491	15.5508	16.911	18.103	22.1241	20.1045	50.3867	35.3626	34.8584
1491	L1272 (m/z=767.517969; rt=7.18886)	3.13073	5.14712	4.64268	3.63094	3.61777	2.00609	6.05367	4.61912	5.23298	3.66695	8.66569	6.57341	12.0068	15.3429	8.89704	71.511	62.6074	72.6478
1492	L1275 (m/z=766.503555; rt=7.18897)	3.27444	4.55065	4.16966	3.47684	3.33513	1.84673	5.5406	4.27945	5.01938	3.79361	8.31961	6.2208	11.1676	14.7666	8.53707	72.7469	64.7485	74.2064
1493	L1281 (m/z=772.515773; rt=7.19008)	5.06335	9.1195	10.0749	6.18252	7.69887	6.18361	11.4494	8.93666	12.9803	6.53795	15.6104	15.7937	19.2142	21.5351	20.7159	51.5526	37.0995	34.2516
1494	L1283 (m/z=772.508637; rt=7.19016)	5.06335	9.1195	10.0749	6.18252	7.69887	6.18361	11.4494	8.93666	12.9803	6.53795	15.6104	15.7937	19.2142	21.5351	20.7159	51.5526	37.0995	34.2516
1495	L1276 (m/z=383.276107; rt=7.18909)	3.28849	4.82418	4.41029	3.43384	3.54754	1.92195	5.37896	4.44949	5.17285	3.4212	8.6302	6.27353	11.1668	15.2077	8.7574	73.3107	63.3409	73.464
1496	L1280 (m/z=772.535736; rt=7.18995)	8.19956	9.23003	10.269	4.08481	6.86925	5.75057	9.44527	8.68549	12.3603	13.4957	15.0165	14.54	16.9384	21.0263	19.5328	47.8362	39.1723	37.5473
1497	L1273 (m/z=768.557056; rt=7.18896)	3.87002	4.91142	4.39119	3.40139	3.61697	2.13368	5.09436	4.64835	4.93057	3.71523	9.38095	6.10374	11.4413	13.9649	8.699	72.4777	63.4774	73.7418
1498	L1285 (m/z=923.522459; rt=7.2006)	8.47159	8.73274	8.40448	8.66984	6.16435	6.21523	10.8233	9.32409	11.4393	7.79108	15.2429	12.578	14.2534	7.58638	14.4395	49.9908	52.9495	46.9235
1499	L1284 (m/z=923.502181; rt=7.19938)	8.47159	8.90136	8.60587	8.66984	6.33074	6.45843	10.8233	9.56663	11.2976	7.79108	14.1501	12.8746	14.2534	7.79115	14.8869	49.9908	53.2601	45.8766
1500	L1287 (m/z=774.509552; rt=7.22525)	7.42879	5.1885	2.535	6.67307	7.731	2.54158	7.78467	6.46682	2.75154	6.15575	9.19798	3.56125	13.5928	14.6815	5.29535	58.3649	56.7342	83.3153
1501	L1289 (m/z=774.542927; rt=7.24356)	13.0241	11.2674	6.48029	9.68693	10.7879	3.66492	11.1248	12.2482	4.86394	5.83529	10.1658	4.68348	11.1027	12.2014	4.83279	49.2261	43.3293	75.4746
1502	L1290 (m/z=856.654898; rt=7.27635)	31.4066	32.8114	36.3188	26.3204	18.6252	14.1104	18.0997	14.832	17.6795	5.54348	13.0376	12.6328	7.14234	10.6953	8.26109	11.4874	9.99851	10.9975
1503	L1291 (m/z=857.657742; rt=7.27637)	31.7301	31.217	35.2681	24.9884	19.4633	14.1408	16.5328	14.8191	18.8703	7.85317	12.3347	12.1964	7.61154	10.8252	8.4633	11.284	11.3406	11.0612
1504	L1292 (m/z=836.55925; rt=7.27801)	8.6377	5.85089	12.3409	5.79422	5.47875	7.28838	12.554	7.59833	6.12492	9.42545	13.1697	14.9638	22.0596	39.171	19.2539	41.5291	28.7314	40.0281
1505	L1344 (m/z=792.565615; rt=7.34734)	4.23104	9.16113	9.20629	4.43555	6.26799	4.13668	7.47836	7.71059	10.2896	14.2311	13.3851	12.3232	12.9509	19.458	15.1939	56.6731	44.0172	48.8503
1506	L1338 (m/z=793.569408; rt=7.34708)	4.16183	9.09426	9.40243	4.52684	6.31341	4.18501	7.35556	7.68119	10.3273	14.5198	13.4292	12.4571	13.2917	19.5841	15.3307	56.1443	43.8978	48.2975
1507	L1336 (m/z=794.573786; rt=7.34701)	4.32883	8.92372	9.16803	4.46842	6.50462	4.10446	7.59662	7.49207	9.96612	14.1859	12.9708	12.1737	13.1695	19.6679	15.0344	56.2508	44.4409	49.5533
1508	L1342 (m/z=396.28403; rt=7.34733)	4.23636	9.2411	9.46958	4.41867	6.18171	4.12033	7.45468	7.54759	10.4429	14.431	13.4507	12.2747	12.7314	19.2879	15.0525	56.7279	44.2911	48.64
1509	L1300 (m/z=956.637584; rt=7.30049)	5.23364	7.97812	8.35263	5.72315	6.1779	4.39063	8.71083	8.24891	8.5285	5.1627	12.8107	11.5661	14.6402	18.8109	13.9137	60.5295	45.9735	53.2484
1510	L1343 (m/z=794.538988; rt=7.34733)	4.55778	8.68358	9.11592	4.60036	6.49595	4.17944	7.85551	7.69731	9.99934	13.9725	13.0812	12.0339	13.4098	19.4246	15.0339	55.6041	44.6174	49.6375
1511	L1340 (m/z=396.786079; rt=7.34725)	4.05084	9.07955	9.54103	4.45543	6.25568	4.11242	7.37209	7.50307	10.3865	14.5134	13.4827	12.2962	13.1107	19.3789	15.126	56.4975	44.3	48.5378
1512	L1293 (m/z=956.636399; rt=7.28354)	4.31591	6.9549	6.61116	4.83578	5.44912	3.99504	8.68496	6.86951	8.61834	5.23649	12.5012	10.5979	14.1862	18.6001	13.8186	62.7407	49.6252	56.3589
1513	L1341 (m/z=264.192636; rt=7.34732)	3.9818	9.17556	9.33421	4.16286	6.27604	4.15618	7.46665	7.67238	10.4118	14.3714	13.5893	12.4111	13.0456	19.5778	15.2409	56.9717	43.7089	48.4459
1514	L1301 (m/z=957.640988; rt=7.30054)	4.48523	8.08547	8.62673	5.51098	6.0904	4.18926	8.56856	7.8673	9.53161	5.52986	12.9303	11.7417	14.8041	18.4668	14.1101	61.1013	46.5598	51.8006
1515	L1347 (m/z=613.486802; rt=7.34761)	4.06254	9.50383	9.75566	4.8548	6.74472	4.43083	7.53891	8.45452	11.0367	15.0376	13.7186	13.0002	13.2231	19.5427	14.2957	55.2831	42.0357	47.481
1516	L1335 (m/z=795.577133; rt=7.34697)	4.34379	9.42065	9.4298	4.75609	6.51668	4.12597	7.40236	7.62347	10.1301	14.1569	13.1774	12.8511	13.1031	19.9429	15.3023	56.2377	43.3189	48.1608
1517	L1348 (m/z=335.259619; rt=7.34793)	4.16748	9.98281	10.0043	5.10347	7.8215	5.09336	7.80317	8.649	10.721	14.2387	13.4258	12.3036	14.5793	19.1557	14.9857	54.1078	40.9652	46.892
1518	L1334 (m/z=264.527419; rt=7.34693)	3.51679	9.26824	9.68543	4.21661	6.37868	4.2328	7.134	7.6362	10.5159	14.6366	13.6687	12.6479	13.595	19.7306	15.3635	56.901	43.3176	47.5544
1519	L1298 (m/z=957.593846; rt=7.29922)	4.93291	7.86977	8.11261	5.99183	6.6637	4.30196	9.32423	8.33645	9.48636	5.6607	13.324	12.1765	15.8315	17.5002	14.9134	58.2588	46.3058	51.0092
1520	L1349 (m/z=613.468058; rt=7.34797)	4.29055	9.42389	9.64519	4.91964	6.87528	4.55226	7.53621	8.58692	10.9738	14.6282	13.5046	12.8796	13.2339	19.2055	14.3744	55.3915	42.4038	47.5747
1521	L1350 (m/z=335.255486; rt=7.34817)	4.2967	9.79212	9.96222	5.14052	7.7797	5.10963	8.09961	8.84415	10.7283	14.0142	13.36	12.2117	14.7375	19.4092	15.3	53.7114	40.8148	46.6882
1522	L1337 (m/z=795.549903; rt=7.34705)	4.52172	9.19491	9.74635	4.96088	6.55131	4.28701	7.56822	7.94252	9.97309	13.7246	13.149	12.3121	13.7144	19.7347	15.0331	55.5102	43.4276	48.6483
1523	L1297 (m/z=956.569608; rt=7.29869)	5.57883	8.13826	8.13438	6.09463	6.46812	4.86495	9.54966	9.01746	9.17586	5.90277	14.1928	12.6002	16.4463	17.9878	14.6077	56.4278	44.1955	50.6168
1524	L1339 (m/z=397.287806; rt=7.34716)	4.14753	8.66872	8.93258	3.88817	6.2279	3.93653	7.02192	7.22357	9.49513	13.9624	12.7807	12.0249	12.4963	19.5867	15.0072	58.4837	45.5124	50.6037
1525	L1299 (m/z=958.643937; rt=7.30007)	4.8196	7.9559	7.83796	6.56001	6.21109	4.54374	8.79712	7.77196	8.55797	5.12994	12.3029	12.091	14.877	18.8826	14.3162	59.8164	46.8755	52.6531
1526	L1332 (m/z=264.198037; rt=7.34536)	11.598	10.8114	10.2662	3.496	5.87873	4.19344	5.93992	7.35615	11.1818	15.2318	14.8166	13.0664	10.7825	20.4932	15.3496	52.9518	40.6439	45.9426
1527	L1351 (m/z=264.522143; rt=7.34836)	4.08714	7.89943	8.76301	4.62085	6.73468	4.5298	7.83448	7.51148	10.2715	13.2039	13.2277	11.9367	15.0424	18.2648	15.3173	55.2112	46.362	49.1818
1528	L1333 (m/z=264.531701; rt=7.34551)	10.2232	9.79682	10.1693	5.34027	6.24359	4.20083	4.96458	7.21817	10.6341	13.5887	13.7282	12.8775	11.0824	20.0507	15.3033	54.8009	42.9626	46.8149
1529	L1345 (m/z=614.49009; rt=7.34738)	4.40163	10.4072	9.42407	5.75652	6.82217	4.80998	8.38603	8.03142	10.5733	14.8257	13.0631	13.2329	13.4473	18.8275	14.668	53.1828	42.8485	47.2917
1530	L1346 (m/z=614.48004; rt=7.34755)	4.47773	10.2738	9.40116	5.84886	6.95077	4.83745	8.50318	8.11567	10.562	14.6555	13.0142	13.2929	13.747	18.7698	14.7024	52.7677	42.8758	47.2042
1531	L1330 (m/z=788.592872; rt=7.34077)	12.3309	13.6628	17.6791	10.8707	11.0029	9.41503	14.3803	12.3519	15.8565	10.8569	15.1469	15.3965	14.9495	19.7588	18.9012	36.6117	28.0766	22.7517
1532	L1296 (m/z=790.608578; rt=7.29597)	8.68189	12.2617	11.2196	10.4197	9.76745	8.29414	10.3565	11.0359	12.5037	8.93365	12.3964	13.5689	12.5733	17.3125	13.8909	49.0349	37.226	40.5228
1533	L1294 (m/z=800.550555; rt=7.28624)	16.114	21.0577	25.8002	17.1794	12.9148	14.1012	17.9135	12.3207	15.2247	9.01513	16.6243	13.177	14.298	21.5862	11.2914	25.48	15.4963	20.4055
1534	L1321 (m/z=780.557124; rt=7.32863)	16.3137	23.1472	27.1466	14.8618	15.2032	13.4628	16.4179	14.9805	17.4611	6.48442	16.2115	15.1264	15.3121	16.852	11.1004	30.61	13.6057	15.7026
1535	L1319 (m/z=781.561556; rt=7.32848)	16.349	22.9545	26.8472	14.8826	15.3761	13.4294	16.4657	15.0618	17.6297	6.48831	16.2176	14.9697	15.339	16.9384	11.3266	30.4755	13.4515	15.7973
1536	L1325 (m/z=390.280195; rt=7.32899)	16.4239	23.0763	26.8199	14.9941	15.0853	13.2057	16.8136	14.8032	17.3455	6.65428	16.2733	15.1646	15.8345	16.7908	11.3432	29.2797	13.971	16.1211
1537	L1317 (m/z=782.565799; rt=7.32841)	16.9281	22.7597	26.9097	15.2108	15.3946	13.1421	16.8574	14.9921	17.679	6.42029	16.1314	15.0491	15.5573	17.2269	11.2186	29.0261	13.4954	16.0014
1538	L1314 (m/z=782.53386; rt=7.32823)	17.3527	22.7621	26.9764	15.5385	15.4043	13.3404	17.3611	15.2477	17.5797	6.57254	16.0789	14.7921	15.7763	17.2549	11.0949	27.3989	13.2521	16.2165
1539	L1323 (m/z=390.782055; rt=7.32868)	16.2501	22.8277	26.8014	14.8929	15.5466	13.4442	16.481	15.0572	17.6056	6.35791	16.3332	15.0306	15.6762	16.7518	11.4212	30.3419	13.4835	15.6971
1540	L1320 (m/z=781.506144; rt=7.3285)	13.9002	22.9135	26.9021	12.7083	15.2723	13.2371	14.1166	15.55	18.3105	21.3192	16.4563	15.5293	13.3101	17.1009	11.2186	24.6455	12.7069	14.8024
1541	L1322 (m/z=260.189803; rt=7.32865)	13.8918	23.3596	27.2053	12.7179	15.1584	13.5752	14.0943	15.0576	17.4602	21.0456	16.4133	15.3604	13.149	16.804	11.1119	25.1014	13.2071	15.287
1542	L1295 (m/z=780.501717; rt=7.29025)	12.881	20.316	23.5302	11.3871	10.8163	11.2378	16.1021	11.6528	17.014	6.96645	17.8151	14.9652	14.1042	20.6598	11.7823	38.5591	18.74	21.4706
1543	L1324 (m/z=783.568412; rt=7.32875)	16.425	22.7078	26.45	14.3515	14.7344	13.2538	15.3331	15.177	17.6744	6.45859	16.1004	14.5017	15.3869	17.0098	11.3315	32.0448	14.2707	16.7885
1544	L1318 (m/z=260.524438; rt=7.32843)	13.161	22.9035	26.8404	12.5384	15.4562	13.1465	13.6523	15.0638	17.753	20.9121	16.1102	14.9557	13.02	16.926	11.3009	26.7162	13.5403	16.0035
1545	L1326 (m/z=391.281617; rt=7.33026)	15.8944	22.5264	25.3525	14.7842	16.5805	15.1896	18.5043	16.3677	17.8747	9.48736	16.9711	16.6071	18.4865	16.902	12.0894	22.8432	10.6524	12.8867
1546	L1327 (m/z=391.287516; rt=7.33094)	15.8944	22.5264	25.3525	14.7842	16.5805	15.1896	18.5043	16.3677	17.8747	9.48736	16.9711	16.6071	18.4865	16.902	12.0894	22.8432	10.6524	12.8867
1547	L1311 (m/z=390.76957; rt=7.32757)	17.1549	24.0149	28.6129	16.1436	16.1685	13.7032	16.8336	15.9825	17.836	6.5585	16.1239	14.3623	15.7068	15.9721	10.6804	27.6027	11.738	14.8052
1548	L1310 (m/z=260.520444; rt=7.32736)	17.3597	23.65	28.1048	16.8215	16.1321	13.7751	17.5819	15.7111	17.8606	6.35668	15.6104	14.4673	15.7418	16.695	10.4301	26.1385	12.2014	15.3621
1549	L1312 (m/z=260.183004; rt=7.32795)	17.5508	24.2267	28.3283	16.4047	15.2484	13.5596	17.5397	15.8702	17.6763	7.30013	16.4549	15.6953	15.6628	16.904	10.9613	25.5419	11.2958	13.7791
1550	L1316 (m/z=781.636824; rt=7.32833)	10.8386	23.4184	25.5614	7.03916	15.9869	11.5591	13.176	13.3247	20.0511	23.7796	16.5239	16.3043	14.3527	15.8085	10.5098	30.8139	14.9375	16.0143
1551	L1313 (m/z=390.261971; rt=7.32797)	16.2975	23.1763	26.94	15.2352	15.9147	13.6589	17.1496	16.4587	18.0392	11.4711	16.7984	16.6546	15.4821	16.76	12.0158	24.3645	10.8919	12.6915
1552	L1315 (m/z=195.139623; rt=7.32825)	13.8573	22.2647	25.0771	17.4922	14.8267	12.4168	14.932	14.7783	17.891	11.2701	16.4438	16.2094	15.2188	17.445	12.7851	27.2296	14.2414	15.6206
1553	L1309 (m/z=195.142814; rt=7.32632)	15.8672	24.7675	28.5774	18.8829	14.4975	12.6561	15.0123	14.2259	17.902	9.83015	15.3787	14.5294	13.4437	17.2727	11.4995	26.9637	13.8576	14.8356
1554	L1303 (m/z=800.557122; rt=7.31975)	20.0236	20.4276	32.186	17.7859	16.2892	14.7136	15.3171	14.2968	16.6798	9.60358	14.8997	12.271	16.3758	18.5149	10.6189	20.894	15.5718	13.5307
1555	L1302 (m/z=800.581944; rt=7.30654)	21.0319	21.1977	32.1284	17.7995	15.6204	13.8378	15.7755	14.6418	16.8166	9.40503	14.6673	12.129	14.3597	18.7866	9.49844	21.6283	15.0862	15.5898
1556	L1308 (m/z=802.539717; rt=7.32574)	20.207	25.7517	27.2561	20.8091	20.5091	19.4499	19.3921	18.4202	17.4371	9.33613	13.4318	13.1413	13.362	10.5716	8.30556	16.8937	11.3156	14.41
1557	L1306 (m/z=802.563088; rt=7.3247)	21.7939	27.8116	29.645	22.4567	21.2698	21.4215	20.6143	20.32	18.5112	10.0079	13.9837	14.0204	14.4719	11.2284	9.41467	10.6554	5.38654	6.98727
1558	L1305 (m/z=803.544363; rt=7.32283)	19.4793	25.6897	27.3987	22.4756	21.9011	20.7929	19.7411	19.1609	19.0416	10.2607	14.7793	14.1823	15.4942	10.407	8.72061	12.5491	8.06207	9.86383
1559	L1304 (m/z=803.564073; rt=7.32251)	20.7786	27.0388	28.6512	23.4675	22.118	21.0945	20.8961	19.7707	20.09	10.9521	15.3027	14.863	16.2944	10.967	9.10987	7.61128	4.80276	6.19135
1560	L1307 (m/z=818.517794; rt=7.32492)	15.3263	29.8125	34.5199	23.6876	21.162	21.0999	18.4366	18.0068	17.835	13.425	13.2664	12.7582	16.6615	10.5279	8.45745	12.4629	7.22433	5.32951
1561	L1328 (m/z=820.558393; rt=7.33635)	13.7868	20.173	21.2448	9.44225	12.0265	8.96634	10.0138	9.69284	13.4344	6.35319	12.2435	11.7772	11.9788	13.61	10.904	48.4252	32.2542	33.6733
1562	L1329 (m/z=818.550331; rt=7.33766)	28.1604	26.465	30.0924	15.514	19.0045	18.2812	12.0787	16.2541	16.5111	10.9006	12.527	13.0712	15.7217	11.1297	12.3356	17.6245	14.6198	9.70849
1563	L1331 (m/z=801.570196; rt=7.34301)	11.4603	9.24014	11.7399	13.0867	8.92196	7.34759	11.8463	8.80237	7.09782	6.92913	8.96093	6.75098	8.11135	7.53045	9.56425	48.5663	56.5442	57.4994
1564	L1355 (m/z=813.49638; rt=7.34966)	11.1872	15.9159	17.516	12.5467	15.1028	12.7815	18.0407	16.9584	18.4773	13.1357	18.9152	19.7402	24.9236	18.9232	21.3068	20.1661	14.1846	10.1782
1565	L1352 (m/z=813.523604; rt=7.3489)	10.7993	15.8239	17.518	12.5767	14.7514	11.9507	17.433	17.1403	18.8343	12.5882	18.6768	19.8858	24.5421	19.2511	21.3345	22.0608	14.3566	10.4767
1566	L1354 (m/z=814.50052; rt=7.34943)	10.2471	15.2402	16.2637	11.2579	13.6744	11.9612	18.9834	16.1972	19.4846	12.2217	19.8264	20.1446	24.2374	19.8329	19.5103	23.0525	15.2291	12.6357
1567	L1353 (m/z=388.343638; rt=7.34921)	11.2866	19.5756	18.9108	15.7204	20.691	19.1828	19.5143	21.1726	17.711	16.5397	18.6175	18.6552	25.8205	12.4417	16.96	11.1185	7.50167	8.58015
1568	L1358 (m/z=797.531178; rt=7.35179)	9.2756	14.2641	14.1764	11.0141	13.7882	11.6721	17.0015	16.4255	19.8257	12.4478	19.6933	21.3275	24.521	19.618	21.3594	25.7401	16.2109	11.6388
1569	L1364 (m/z=797.511261; rt=7.35243)	9.2756	14.2641	14.1764	11.0141	13.7882	11.6721	17.0015	16.4255	19.8257	12.4478	19.6933	21.3275	24.521	19.618	21.3594	25.7401	16.2109	11.6388
1570	L1360 (m/z=798.52806; rt=7.35186)	9.78592	15.366	14.435	12.2935	13.9546	12.349	19.2014	16.3833	19.3541	12.9963	19.5664	20.8626	26.4449	19.5435	22.4803	19.278	15.1862	10.519
1571	L1365 (m/z=798.503317; rt=7.35248)	9.04882	15.1182	14.5878	11.3035	13.9689	12.3457	17.8482	16.3847	19.0311	12.1051	19.4392	20.733	24.2992	19.3119	22.3553	25.395	15.777	10.9471
1572	L1362 (m/z=398.761075; rt=7.35216)	7.84116	14.3845	13.412	10.4823	12.7353	10.7426	16.9387	15.8419	19.0184	11.7211	19.7776	21.1541	24.5185	20.3929	21.9382	28.4983	16.8678	13.7346
1573	L1359 (m/z=799.528547; rt=7.35181)	8.92686	14.5223	13.9379	11.8185	13.9492	10.9172	16.4357	17.0585	19.4749	13.6891	19.8289	21.6316	28.2553	20.0966	22.0455	20.8745	14.5445	11.9929
1574	L1356 (m/z=398.767268; rt=7.35103)	7.70332	14.4759	13.5301	10.32	12.3374	10.5304	16.3875	16.0781	19.1294	11.3314	19.6682	21.0826	24.1129	20.2995	22.0105	30.1448	17.1409	13.7169
1575	L1363 (m/z=399.263681; rt=7.35219)	10.8554	13.0272	13.187	9.57861	12.3614	10.3624	17.0968	15.8557	17.9975	11.5544	19.6404	20.562	22.4246	19.9039	21.2665	28.4901	19.2115	16.6246
1576	L1361 (m/z=820.602716; rt=7.35213)	15.5957	21.9751	24.8896	11.2749	13.0979	10.1744	13.8335	11.3407	16.2212	6.35824	14.404	14.7357	16.2491	17.2283	14.271	36.6886	21.954	19.7082
1577	L1368 (m/z=742.541789; rt=7.41348)	17.0692	22.5382	28.6515	17.9704	14.221	11.4844	18.0294	15.1645	16.3304	8.37193	16.5408	12.9599	11.8443	15.389	9.42696	26.7149	16.1465	21.1468
1578	L1357 (m/z=821.604608; rt=7.35127)	16.2103	23.3789	26.9782	9.74846	12.4134	9.62228	12.8206	12.6347	15.2308	8.64857	14.4106	12.8093	16.6108	15.3401	14.16	35.9611	21.8222	21.1994
1579	L1366 (m/z=801.521976; rt=7.39025)	6.8791	5.63184	4.89264	6.99573	4.48842	4.2108	7.12987	4.44056	4.96101	6.77878	8.65791	7.96652	7.81209	5.50328	11.607	64.4044	71.278	66.362
1580	L1367 (m/z=716.570944; rt=7.40866)	24.298	32.0175	32.4568	17.6599	13.4027	10.7312	18.1737	12.1942	17.4368	7.70897	15.7394	13.4601	10.4582	9.30886	7.85508	21.7012	17.3372	18.06
1581	L1369 (m/z=776.583101; rt=7.47511)	29.6835	24.3259	30.3688	24.2549	18.5738	15.5113	18.6198	15.3254	16.0826	7.63408	15.3191	12.6868	8.83645	13.2495	6.60274	10.9713	13.2065	18.7478
1582	L1370 (m/z=776.56853; rt=7.47593)	29.6709	24.834	30.9	24.3337	18.681	15.5068	18.7762	15.4213	15.9569	7.51999	15.439	12.5526	8.7713	13.3548	6.74004	10.9279	12.2698	18.3436
1583	L1372 (m/z=777.587013; rt=7.47703)	25.062	22.1463	32.5242	25.6222	16.6818	14.4115	19.2178	15.9023	15.4807	6.56055	14.3791	13.8098	9.41639	14.5353	7.6935	14.121	16.3551	16.0804
1584	L1373 (m/z=777.587013; rt=7.47703)	25.062	22.1463	32.5242	25.6222	16.6818	14.4115	19.2178	15.9023	15.4807	6.56055	14.3791	13.8098	9.41639	14.5353	7.6935	14.121	16.3551	16.0804
1585	L1371 (m/z=776.544716; rt=7.47644)	27.9071	24.6167	30.7074	23.1363	18.4215	15.9343	18.65	15.1612	15.9591	10.2348	13.9781	11.4787	8.39447	11.9415	13.8003	11.6772	15.8811	12.1203
1586	L1381 (m/z=911.515006; rt=7.53212)	5.90405	8.06626	7.82328	8.76963	5.22227	5.39835	8.18644	7.62279	11.5602	11.2008	20.79	15.537	17.6799	8.75959	13.9455	48.2592	49.5391	45.7357
1587	L1374 (m/z=912.528637; rt=7.49704)	7.36328	9.37792	4.43184	11.41	7.52578	6.04037	7.90898	7.42506	12.5572	7.76688	16.7253	17.9995	18.2075	9.86122	16.53	47.3433	49.0847	42.441
1588	L1378 (m/z=912.49985; rt=7.50503)	8.04681	9.94789	5.15053	12.0235	7.87316	6.32789	8.26453	7.03528	11.8582	8.19378	16.4375	18.6422	19.0005	10.1507	16.1894	44.4709	48.5555	41.8318
1589	L1376 (m/z=738.511213; rt=7.50026)	29.2279	32.8011	39.5991	28.3972	18.4423	21.7052	17.0885	15.7271	19.1324	8.51984	18.1385	12.5945	9.74364	11.5667	4.17811	7.02296	3.32424	2.79071
1590	L1377 (m/z=738.509431; rt=7.50027)	29.2279	32.8011	39.5991	28.3972	18.4423	21.7052	17.0885	15.7271	19.1324	8.51984	18.1385	12.5945	9.74364	11.5667	4.17811	7.02296	3.32424	2.79071
1591	L1375 (m/z=738.533541; rt=7.49993)	29.1283	33.5964	40.283	28.486	18.3472	21.3677	16.7475	15.6136	19.0217	8.58301	17.9913	12.4912	10.1508	11.2405	4.13911	6.90442	3.21112	2.69737
1592	L1380 (m/z=982.654389; rt=7.52368)	5.79876	5.75697	5.76543	6.31988	4.45106	2.53165	8.33411	5.76373	6.25051	5.39529	10.8344	8.70291	13.3675	18.5741	11.1134	60.7845	54.6197	65.6361
1593	L1379 (m/z=982.62027; rt=7.52362)	5.79661	5.61707	5.89918	6.34798	4.59424	2.5317	8.42854	5.96328	6.2227	5.32802	11.0107	8.69996	13.3041	18.6161	11.1802	60.7948	54.1986	65.4662
1594	L1392 (m/z=909.499309; rt=7.58873)	6.49825	8.67703	7.41997	8.00982	5.4943	4.33628	10.2083	7.26949	9.19386	6.66438	12.8254	12.3336	14.1074	7.97209	14.6942	54.5119	57.7616	52.0221
1595	L1393 (m/z=909.506812; rt=7.5888)	6.49825	8.67703	7.41997	8.00982	5.4943	4.33628	10.2083	7.26949	9.19386	6.66438	12.8254	12.3336	14.1074	7.97209	14.6942	54.5119	57.7616	52.0221
1596	L1390 (m/z=910.510148; rt=7.58828)	6.68597	8.00711	7.59056	7.82753	5.34086	4.1991	9.46868	7.50736	9.36361	6.46025	13.7487	11.7733	15.0591	8.52293	14.2935	54.4985	56.873	52.7799
1597	L1391 (m/z=910.502746; rt=7.58828)	6.68597	8.00711	7.59056	7.82753	5.34086	4.1991	9.46868	7.50736	9.36361	6.46025	13.7487	11.7733	15.0591	8.52293	14.2935	54.4985	56.873	52.7799
1598	L1388 (m/z=926.535473; rt=7.58533)	7.0185	6.44424	7.40166	7.55772	5.83277	5.16991	8.91583	7.26514	7.88513	8.28256	12.552	11.6435	13.5873	6.85898	15.9897	54.6381	61.0469	51.91
1599	L1389 (m/z=926.507982; rt=7.58547)	7.37403	6.64749	7.21465	7.6806	5.67566	5.04699	8.66929	7.53531	8.35422	8.03731	12.5262	12.3272	13.563	6.70712	16.3993	54.6758	60.9082	50.6576
1600	L1384 (m/z=923.522057; rt=7.57347)	6.99995	9.03522	5.88636	6.52064	5.20241	5.4996	7.49037	7.32196	7.76602	7.06038	13.1124	12.4493	15.469	6.14077	13.6161	56.4597	59.1872	54.7826
1601	L1394 (m/z=927.539542; rt=7.59798)	8.03791	7.36146	7.3097	7.40673	8.12913	5.25644	10.5672	8.10754	8.29321	8.16035	12.1528	12.356	11.343	8.49154	14.6894	54.4848	55.7576	52.0952
1602	L1382 (m/z=911.474589; rt=7.56848)	8.02518	10.6411	9.68322	8.08116	6.78623	5.42373	11.4021	7.55079	9.17212	8.59868	13.5059	11.5138	12.4421	8.6066	13.5614	51.4508	52.9094	50.6457
1603	L1383 (m/z=923.485697; rt=7.57336)	7.41784	8.71832	5.9464	8.33981	4.68974	6.01524	7.103	8.2269	7.74955	7.42328	12.7037	12.861	15.1437	12.0157	14.0758	54.5724	53.6456	53.352
1604	L1386 (m/z=924.52711; rt=7.57369)	7.06333	8.93209	6.15028	9.4033	5.21041	5.50721	8.19058	7.47425	8.97281	9.46866	13.4922	10.0137	13.7908	6.74671	12.801	52.0833	58.1443	56.555
1605	L1385 (m/z=924.497716; rt=7.57355)	7.05093	9.11692	7.25588	10.1227	5.52569	5.57024	6.62354	7.28446	8.95575	9.87093	13.6645	10.1479	14.2612	7.103	12.9792	52.0708	57.3054	55.091
1606	L1387 (m/z=927.509668; rt=7.58444)	6.43986	7.4453	6.50067	7.87712	5.03123	5.76582	9.31623	7.47594	9.2305	6.84813	13.6819	13.7524	12.8805	9.88282	16.3496	56.6382	56.4828	48.401
1607	L1395 (m/z=780.557237; rt=7.61583)	13.8446	18.3523	21.0727	13.4295	13.5626	7.67126	11.5868	10.2288	13.455	16.3046	13.4657	14.5626	12.584	18.9379	7.76235	32.2504	25.4528	35.4761
1608	L1396 (m/z=781.56125; rt=7.61712)	13.9932	19.4015	17.4908	17.3459	13.5076	9.42208	20.8369	11.951	13.178	9.65417	17.2705	16.1865	15.934	16.9417	8.45889	22.2359	20.9277	35.2637
1609	L1397 (m/z=730.540982; rt=7.62448)	17.5625	20.1458	22.2464	18.033	14.4954	10.5607	18.8043	14.3444	15.2735	11.0729	14.8664	16.7487	15.8039	18.8607	11.4263	18.7234	17.2872	23.7444
1610	L1401 (m/z=764.54776; rt=7.6285)	11.2932	8.19476	13.9639	10.63	6.27662	7.93066	10.0412	6.13486	7.28224	7.43452	9.55084	11.0942	18.9296	40.8497	10.0366	41.6715	28.9932	49.6924
1611	L1400 (m/z=764.519979; rt=7.62849)	11.3652	8.72692	15.3424	10.9132	6.61882	8.92965	10.4761	6.13718	8.26737	7.48041	9.7241	11.3907	19.3256	42.6079	10.9925	40.4395	26.185	45.0774
1612	L1399 (m/z=765.551613; rt=7.62804)	10.7284	7.83927	14.5368	10.2881	5.73429	7.70979	10.8726	6.40362	7.87296	5.49928	10.4038	10.5772	19.6646	40.233	9.50481	42.947	29.386	49.7984
1613	L1398 (m/z=765.526724; rt=7.62768)	10.7392	8.23176	13.2126	9.39043	5.63924	8.60069	11.5799	6.65304	8.11663	5.82713	11.1433	12.2599	20.5967	41.6284	11.2869	41.8666	26.7043	46.5233
1614	L1402 (m/z=792.565983; rt=7.63018)	6.70904	6.56139	3.45191	5.92567	3.94597	2.27694	7.21081	5.33813	4.45211	7.13048	8.8682	6.63482	8.97286	11.9487	7.35672	64.0511	63.3377	75.8275
1615	L1403 (m/z=792.540315; rt=7.64521)	5.60236	6.91855	3.29557	6.42079	5.1122	3.20613	8.17152	4.40122	4.29822	7.33178	8.50515	6.89183	8.95591	11.2001	6.05654	63.5177	63.8628	76.2517
1616	L1409 (m/z=905.583088; rt=7.65526)	7.82387	7.38443	8.47448	7.57337	7.6397	4.05741	12.0831	8.2692	6.86857	7.95591	7.23644	8.72107	11.2187	19.8443	11.5965	53.3451	49.6259	60.282
1617	L1411 (m/z=905.554105; rt=7.65544)	7.96553	7.44804	8.56582	7.60137	7.77384	4.22148	12.2652	8.34451	7.02242	8.07303	7.47846	8.85207	11.3542	19.8024	11.8128	52.7406	49.1527	59.5254
1618	L1407 (m/z=906.587279; rt=7.65516)	7.84146	7.25558	8.41134	7.30207	7.19017	4.18998	11.9196	7.56358	7.34872	6.99277	7.83143	8.37708	10.9373	19.4374	11.601	55.0069	50.7218	60.0719
1619	L1413 (m/z=905.536727; rt=7.65685)	8.62026	7.9249	8.62017	7.47881	8.46282	4.43529	12.4106	8.81981	7.48714	8.66074	7.71219	9.00336	11.8375	19.4356	12.0231	50.9921	47.6447	58.431
1620	L1410 (m/z=906.550328; rt=7.65543)	8.21015	7.41542	8.67878	7.4462	7.59055	4.28693	11.9537	8.566	7.79635	7.60853	8.098	8.81859	11.6597	19.3601	11.9791	53.1217	48.97	58.4403
1621	L1404 (m/z=907.589541; rt=7.65495)	8.50095	7.87903	8.76229	7.23751	7.35901	3.95268	12.9599	7.95389	6.88593	7.30614	7.32571	8.92739	11.3064	20.8297	12.5417	52.689	48.6527	58.93
1622	L1406 (m/z=452.791083; rt=7.65511)	7.62906	7.49361	8.84706	7.55534	7.52617	3.9527	12.108	7.92469	6.6452	7.31393	6.27628	9.01499	11.2836	20.9387	12.4577	54.11	49.8405	59.0824
1623	L1408 (m/z=452.795849; rt=7.65519)	7.62906	7.49361	8.84706	7.55534	7.52617	3.9527	12.108	7.92469	6.6452	7.31393	6.27628	9.01499	11.2836	20.9387	12.4577	54.11	49.8405	59.0824
1624	L1412 (m/z=452.792708; rt=7.65613)	7.62906	7.49361	8.84706	7.55534	7.52617	3.9527	12.108	7.92469	6.6452	7.31393	6.27628	9.01499	11.2836	20.9387	12.4577	54.11	49.8405	59.0824
1625	L1405 (m/z=907.548946; rt=7.6551)	8.6333	7.60771	8.54498	7.75505	7.57968	3.99575	9.15191	7.71711	6.89412	7.26534	8.25826	9.72719	11.6334	21.2619	12.3522	55.561	47.5754	58.4858
1626	L1414 (m/z=925.539658; rt=7.70764)	4.61144	5.61508	3.33627	6.87136	5.26921	3.78795	6.68405	5.97967	5.7025	7.04195	10.4947	7.93676	12.7162	13.17	10.8356	62.075	59.4713	68.4009
1627	L1415 (m/z=925.512652; rt=7.70774)	4.43688	5.92833	3.24361	6.28788	5.40587	3.68969	5.7049	4.76132	5.72038	7.47363	9.855	8.39145	12.7826	13.8812	10.7849	63.3141	60.1683	68.1699
1628	L1418 (m/z=889.556965; rt=7.82273)	14.9523	14.336	23.0572	10.657	14.7805	6.70726	20.5814	16.44	12.5307	11.7448	8.22689	10.7255	11.9042	15.5248	10.2454	30.1602	30.6919	36.7339
1629	L1417 (m/z=889.541442; rt=7.82154)	14.9841	14.3479	23.0572	10.4673	14.7098	6.70726	20.6251	16.4536	12.5307	11.7698	8.23372	10.7255	11.9295	15.5377	10.2454	30.2242	30.7173	36.7339
1630	L1419 (m/z=890.567468; rt=7.82308)	16.5237	16.7317	23.5853	10.1808	14.6932	6.99093	20.0086	14.5885	11.5089	13.1463	9.86881	8.95392	12.3016	14.4426	10.8627	27.839	29.6752	38.0982
1631	L1416 (m/z=890.542543; rt=7.82128)	16.5117	15.4677	23.5853	10.1823	14.9163	6.99093	20.0115	14.81	11.5089	13.1482	10.0186	8.95392	12.3033	14.6618	10.8627	27.843	30.1256	38.0982
1632	L1420 (m/z=812.559586; rt=7.8668)	17.8885	10.5451	17.3413	12.4139	11.3903	13.6958	17.8582	13.7699	17.1653	10.8087	15.6162	18.8633	19.8841	28.109	15.9334	21.1465	20.5696	17.0008
1633	L1422 (m/z=885.558396; rt=7.87876)	13.274	14.3944	24.6918	11.9328	15.3181	8.18628	17.3059	12.1682	13.4636	5.59557	8.33265	11.3391	7.85813	16.6825	10.4216	44.0335	33.1041	31.8975
1634	L1423 (m/z=885.558865; rt=7.87877)	13.274	14.3944	24.6918	11.9328	15.3181	8.18628	17.3059	12.1682	13.4636	5.59557	8.33265	11.3391	7.85813	16.6825	10.4216	44.0335	33.1041	31.8975
1635	L1421 (m/z=885.528757; rt=7.87705)	13.8205	13.284	24.1539	11.8158	16.2141	7.87604	18.6392	12.2381	13.8788	5.90672	8.57807	11.4911	7.88078	17.5523	11.1285	41.937	32.1335	31.4718
1636	L1424 (m/z=953.541784; rt=7.8852)	13.5224	18.8839	14.9736	15.6536	14.6307	10.1246	18.1882	16.8828	13.9162	13.3428	19.4878	16.0567	23.4675	16.1142	15.6552	15.8256	14.0006	29.2736
1637	L1430 (m/z=937.592552; rt=7.88914)	12.2928	18.1986	18.1918	14.4898	15.4302	12.4425	17.5637	16.2726	18.942	15.0848	19.4571	19.3309	23.2366	17.874	20.462	17.3323	12.7676	10.6307
1638	L1429 (m/z=938.595778; rt=7.88877)	13.3104	18.5587	18.1135	14.8429	16.0964	13.5368	17.5785	16.4201	17.1148	14.9973	19.0884	20.254	21.6903	17.0501	20.1909	17.5807	12.7863	10.79
1639	L1427 (m/z=938.562162; rt=7.88639)	13.0064	19.338	18.897	14.9185	15.9908	14.4204	18.1256	17.3046	17.123	14.9938	18.8826	20.2904	21.4973	16.0856	19.7818	17.4584	12.3984	9.48737
1640	L1425 (m/z=937.541131; rt=7.88552)	12.5934	18.2366	18.9519	15.4263	16.75	13.846	18.0538	16.7304	19.5185	15.8371	19.6052	18.5122	21.9164	16.5521	19.5704	16.1731	12.1257	9.60109
1641	L1428 (m/z=939.599988; rt=7.88726)	11.9856	20.0196	17.7448	13.4514	16.9996	10.0398	19.9466	17.1265	17.5973	15.6224	22.5387	19.4853	23.439	11.7952	19.2763	15.555	11.5205	15.8565
1642	L1426 (m/z=468.797405; rt=7.88604)	11.4816	17.2251	17.9627	13.1773	14.5141	11.5458	15.6594	15.1189	17.9906	16.6725	18.5707	19.2576	21.9776	19.3126	20.0476	21.0317	15.2587	13.1957
1643	L1431 (m/z=953.568179; rt=7.88953)	13.267	18.3154	17.6768	15.074	14.5651	11.4461	17.5893	16.492	15.97	13.1973	18.2054	18.8741	23.2897	18.6415	18.5223	17.5827	13.7806	17.5107
1644	L1432 (m/z=953.614044; rt=7.89403)	10.8707	16.0468	17.789	11.772	12.728	8.0328	15.8862	14.8419	16.5195	13.4444	16.1944	20.2718	21.3407	18.3612	18.3678	26.6861	21.8277	19.0191
1645	L1434 (m/z=391.286679; rt=7.8975)	16.209	17.1273	17.4443	19.8326	13.5288	12.1395	15.9293	20.0934	24.5501	13.2779	14.6812	15.6524	14.5186	16.8855	14.1575	20.2326	17.6839	16.0563
1646	L1433 (m/z=391.283354; rt=7.89661)	16.2266	17.247	17.5873	19.8541	13.0052	12.1792	15.9466	20.1531	24.7514	13.2923	14.7838	15.7807	14.4257	17.0035	13.5959	20.2546	17.8075	16.1056
1647	L1447 (m/z=932.636174; rt=7.90407)	8.46426	10.987	10.8577	8.58574	8.84193	6.56039	10.5528	9.48495	11.5977	7.04311	13.0544	13.8047	16.1704	19.9285	16.009	49.1836	37.7032	41.1705
1648	L1446 (m/z=933.64108; rt=7.90392)	8.50193	10.998	11.0791	8.54587	8.94895	6.64583	10.7882	9.36171	11.7099	7.14035	13.5572	14.0318	16.2091	19.8174	16.27	48.8145	37.3168	40.2634
1649	L1439 (m/z=933.594705; rt=7.90185)	8.72962	10.151	10.3806	8.8146	9.07896	6.74549	11.1385	9.55781	11.9836	7.5544	13.628	13.3467	16.6526	19.5462	16.6257	47.1103	38.038	40.918
1650	L1444 (m/z=934.644324; rt=7.90383)	8.674	11.2316	10.9924	8.47806	8.59599	6.79112	10.3667	9.2164	11.3957	7.38451	13.4309	14.0908	16.1279	19.7594	16.4496	48.9688	37.7658	40.2804
1651	L1440 (m/z=934.608819; rt=7.90233)	9.00049	11.056	10.7077	8.7355	8.61695	6.99561	10.5271	9.39195	11.4408	7.62771	13.6067	13.874	16.5084	19.7764	16.7698	47.6008	37.552	40.2122
1652	L1445 (m/z=466.320014; rt=7.90391)	9.09961	11.4256	11.1884	9.09995	9.21334	6.83818	10.8081	9.72488	11.7945	7.41213	13.2186	14.1504	16.0572	19.6924	16.0413	47.523	36.7252	39.9872
1653	L1462 (m/z=768.567682; rt=7.9182)	5.69407	9.16338	8.17916	6.2153	6.18296	4.37688	8.78811	7.59798	8.95071	5.16201	12.3883	11.379	14.0374	18.4349	14.4382	60.1031	46.2325	52.676
1654	L1441 (m/z=466.817917; rt=7.90291)	8.89981	11.1075	11.4036	9.1364	9.47511	7.28925	11.4786	9.80583	11.9735	7.18422	14.1523	14.1699	16.74	19.4147	16.3971	46.561	36.0446	38.7667
1655	L1451 (m/z=466.826657; rt=7.9051)	8.89981	11.1075	11.4036	9.1364	9.47511	7.28925	11.4786	9.80583	11.9735	7.18422	14.1523	14.1699	16.74	19.4147	16.3971	46.561	36.0446	38.7667
1656	L1464 (m/z=769.571439; rt=7.91871)	6.28969	9.64564	7.46211	6.24048	6.3865	4.06897	8.66507	7.57528	9.25846	5.93049	12.3661	11.4809	14.4259	18.3553	14.8875	58.4484	45.6711	52.8421
1657	L1448 (m/z=310.884288; rt=7.90426)	8.24478	11.5824	11.3034	8.65769	9.04074	6.91827	10.9101	9.6999	11.3401	6.90444	13.1926	14.2846	16.8284	19.6739	15.6728	48.4546	36.8105	40.4808
1658	L1443 (m/z=935.647551; rt=7.90353)	8.34851	11.8879	10.667	8.05927	8.70321	7.62983	11.4961	9.25304	12.4346	7.28221	14.0563	13.454	18.1572	19.5291	16.5192	46.6567	36.5704	39.2954
1659	L1437 (m/z=466.300225; rt=7.89864)	9.21805	10.9825	9.90944	9.82959	9.58873	7.57941	12.9975	10.9565	11.9436	8.09306	14.5097	14.6519	18.1752	19.6222	18.0395	41.6866	34.3403	37.8761
1660	L1435 (m/z=310.877356; rt=7.89853)	8.87203	10.062	10.4245	9.90944	9.63069	7.95058	12.4195	11.0315	12.727	8.11168	15.3371	14.2277	18.5761	18.7156	17.629	42.1112	35.2232	37.0412
1661	L1449 (m/z=311.218901; rt=7.90432)	8.62493	11.8033	11.81	8.63608	9.29664	6.83215	10.8021	9.86168	12.3111	6.76845	14.278	14.6124	17.3233	19.5257	16.4703	47.8452	35.2347	37.9641
1662	L1461 (m/z=769.53583; rt=7.91783)	6.37875	9.24875	7.33424	6.21034	7.63873	4.25134	9.36058	8.04448	8.73115	6.6696	12.0349	11.4743	16.7482	17.7749	14.74	54.6325	45.2582	53.469
1663	L1453 (m/z=591.503149; rt=7.90711)	8.17929	13.5964	12.5367	9.02818	8.5528	7.03532	12.0292	9.74848	12.5364	5.98072	13.7488	14.5345	15.976	18.9952	16.2964	48.8066	35.3584	37.0608
1664	L1452 (m/z=591.490911; rt=7.90631)	8.32863	13.5678	12.6256	9.39073	8.6143	7.16635	12.1965	9.87902	12.5423	6.10795	13.8413	14.4932	16.0339	18.9117	16.2511	47.9423	35.1858	36.9214
1665	L1442 (m/z=467.322202; rt=7.90338)	8.74211	11.4151	11.3306	8.65889	8.57889	6.66719	10.5592	9.607	11.8716	6.932	14.2531	14.9468	16.6224	20.2422	16.8985	48.4854	35.9037	38.2853
1666	L1450 (m/z=467.327978; rt=7.90476)	8.74211	11.4151	11.3306	8.65889	8.57889	6.66719	10.5592	9.607	11.8716	6.932	14.2531	14.9468	16.6224	20.2422	16.8985	48.4854	35.9037	38.2853
1667	L1460 (m/z=770.574336; rt=7.91782)	6.04637	10.1458	9.739	6.40964	6.56747	5.13655	10.2605	8.31739	10.2986	5.49321	12.0358	12.1269	16.0847	17.6119	14.5454	55.7056	45.3216	48.1536
1668	L1458 (m/z=768.514125; rt=7.91597)	6.01636	8.7066	7.59507	6.49224	6.44958	4.12637	9.06291	7.94358	8.15736	5.67773	12.1578	9.76606	15.6619	16.601	13.9882	57.0888	48.1415	56.3669
1669	L1463 (m/z=384.283293; rt=7.91847)	6.87417	10.0856	9.22476	6.70155	6.60601	4.49914	9.55493	8.05554	10.2338	5.61354	13.6255	12.221	15.2315	18.0044	14.7405	56.0243	43.623	49.0808
1670	L1465 (m/z=384.286823; rt=7.91898)	6.87417	10.0856	9.22476	6.70155	6.60601	4.49914	9.55493	8.05554	10.2338	5.61354	13.6255	12.221	15.2315	18.0044	14.7405	56.0243	43.623	49.0808
1671	L1436 (m/z=311.212947; rt=7.8986)	8.80964	9.74576	9.86472	9.67103	9.86196	7.02752	11.9266	10.6936	12.913	7.88245	15.6463	14.7188	18.1319	20.1474	18.4169	43.5784	33.905	37.0591
1672	L1438 (m/z=935.587552; rt=7.89946)	8.00578	12.9303	11.6299	10.0319	9.9513	8.89813	12.717	10.263	13.5947	12.8277	16.2576	16.5571	20.0434	17.2103	19.458	36.3741	33.3875	29.8622
1673	L1459 (m/z=770.542739; rt=7.91704)	8.14791	11.1173	9.34901	7.58042	6.46296	5.14816	9.27177	7.96776	10.4776	8.61946	12.3423	13.3353	15.5781	18.9478	15.5199	50.8024	43.1619	46.1701
1674	L1456 (m/z=773.523228; rt=7.90914)	8.75463	14.441	13.6415	9.05658	12.0851	8.30618	14.4993	13.5937	12.5293	10.9188	16.9832	17.8043	21.901	15.6217	25.6657	34.8697	27.2754	22.053
1675	L1454 (m/z=774.527507; rt=7.90734)	10.3908	13.4087	12.0902	10.1194	11.0701	12.3	12.1899	12.7535	16.3813	10.8	20.2349	17.8303	22.3007	18.3075	21.4593	34.1992	24.2253	19.939
1676	L1455 (m/z=774.550754; rt=7.90738)	10.3523	13.8447	11.8327	11.0353	12.5391	12.0531	11.4743	12.3408	16.5649	9.41793	19.7047	16.0213	18.5734	19.6137	23.1099	39.1467	21.9571	20.4181
1677	L1457 (m/z=388.343832; rt=7.91226)	14.6896	17.1287	16.6065	17.9367	19.3532	17.3962	22.6897	18.96	17.9979	16.622	18.1548	17.6019	15.6871	14.8845	12.112	12.3751	11.5188	18.2854
1678	L1466 (m/z=738.537995; rt=7.9195)	19.4136	11.2612	13.2878	16.6272	10.0001	13.213	11.8215	8.54901	14.6729	6.51868	5.82546	13.6168	18.0728	45.6238	14.1663	27.5462	18.7404	31.0432
1679	L1483 (m/z=716.571836; rt=7.93894)	26.5746	26.9518	29.0381	23.7762	19.4961	15.8488	19.4735	16.5834	19.1201	6.5891	15.3203	13.7636	9.28836	10.1791	10.2708	14.2981	11.4693	11.9586
1680	L1467 (m/z=716.541497; rt=7.93134)	26.4531	26.2754	28.2122	23.7066	19.6869	15.6893	19.2972	16.9564	19.282	7.11279	15.6154	13.9917	9.65076	9.76238	10.7634	13.7796	11.7034	12.0614
1681	L1473 (m/z=717.576433; rt=7.93871)	26.6264	27.0859	28.7333	23.8687	19.4617	15.7325	19.3673	16.1515	19.941	6.66131	15.1826	13.3873	9.4393	10.6897	10.3879	14.037	11.4286	11.818
1682	L1474 (m/z=717.55087; rt=7.93873)	26.2059	26.2464	28.3755	24.1049	18.9062	15.7906	19.5784	16.1375	19.7462	6.95038	15.8076	13.4173	9.57519	10.9659	10.3936	13.5853	11.9364	12.2768
1683	L1468 (m/z=716.525973; rt=7.93437)	25.5306	25.6684	27.1602	24.3324	18.9699	15.2901	19.4417	16.0704	18.537	6.61719	15.6139	13.9731	9.63573	10.7518	11.5498	14.4424	12.9256	13.4898
1684	L1492 (m/z=358.288817; rt=7.93915)	27.3568	27.0837	29.1027	24.2364	19.5584	16.1512	19.5487	16.4828	19.3143	6.24555	15.7965	13.6689	8.99321	10.2946	10.0622	13.6192	10.784	11.7006
1685	L1500 (m/z=358.284075; rt=7.93941)	27.3568	27.0837	29.1027	24.2364	19.5584	16.1512	19.5487	16.4828	19.3143	6.24555	15.7965	13.6689	8.99321	10.2946	10.0622	13.6192	10.784	11.7006
1686	L1479 (m/z=718.580796; rt=7.93884)	27.8849	28.0565	28.0013	23.7404	19.5093	16.1473	17.5689	16.9188	20.3748	6.88405	14.8707	13.5161	9.13575	10.1437	10.0586	14.7859	10.501	11.902
1687	L1478 (m/z=718.562552; rt=7.93883)	27.7376	27.9059	28.7102	23.7775	19.8083	15.93	17.7109	16.962	20.1864	7.26969	14.8559	13.3765	9.32563	9.98087	9.9752	14.1787	10.487	11.8217
1688	L1485 (m/z=358.792133; rt=7.93903)	26.0551	28.0942	30.2184	23.5771	19.4454	15.46	18.8897	16.7827	19.3439	9.44079	14.4476	13.4708	8.06853	9.75724	9.44867	13.9688	11.4729	12.0581
1689	L1499 (m/z=358.787461; rt=7.93931)	26.0278	27.6258	30.1301	23.9501	20.0119	15.1802	18.9336	16.6982	19.4579	9.38594	14.4436	13.297	8.09963	10.047	9.5329	13.6029	11.1735	12.4019
1690	L1497 (m/z=238.861499; rt=7.93927)	25.8526	28.4251	29.5797	24.1352	19.9567	15.2722	18.7769	15.6321	19.0421	9.80146	15.0496	13.5231	8.72531	9.7408	9.98281	12.7086	11.1958	12.6001
1691	L1502 (m/z=238.859561; rt=7.93954)	25.8526	28.4251	29.5797	24.1352	19.9567	15.2722	18.7769	15.6321	19.0421	9.80146	15.0496	13.5231	8.72531	9.7408	9.98281	12.7086	11.1958	12.6001
1692	L1508 (m/z=554.517178; rt=7.94051)	27.3297	30.5419	32.9557	22.2824	18.9955	14.807	18.5133	16.7569	20.0333	9.69343	13.2046	13.6409	10.1526	10.7749	8.41669	12.0285	9.7262	10.1464
1693	L1486 (m/z=756.556924; rt=7.93904)	20.3113	23.2348	26.934	20.5344	17.4789	15.7521	19.0042	16.5114	17.6467	6.56454	16.3196	15.1752	12.849	15.5394	10.3705	20.7365	10.916	14.1215
1694	L1482 (m/z=757.560639; rt=7.93892)	20.6631	23.4378	27.3626	20.5697	17.5135	16.0232	18.7687	16.4417	17.3082	6.53585	16.2101	14.9164	12.8186	15.4207	10.2583	20.644	10.9762	14.1313
1695	L1498 (m/z=378.279673; rt=7.9393)	20.7551	23.565	27.3269	20.9209	17.641	15.8668	19.3034	16.8053	17.8977	6.706	16.2444	15.2144	12.8478	15.4527	10.1053	19.4668	10.2916	13.5888
1696	L1475 (m/z=758.567863; rt=7.93877)	20.1464	23.5439	27.0866	21.0148	17.4612	16.1587	19.4246	16.599	17.3312	6.56697	16.4777	14.9674	12.5552	15.215	10.3665	20.292	10.7032	14.0896
1697	L1490 (m/z=378.781595; rt=7.93914)	21.0076	23.6264	27.5928	21.3145	17.7446	15.9981	19.154	16.6866	17.6511	6.54211	16.1836	15.1319	12.5688	15.3598	10.1307	19.413	10.399	13.4954
1698	L1489 (m/z=758.533162; rt=7.93908)	20.0556	23.3579	26.8008	20.7199	17.3754	16.0945	19.4606	16.5449	17.4256	7.19773	16.5681	15.019	12.9134	15.257	10.4685	19.6527	10.8967	14.1916
1699	L1494 (m/z=252.189377; rt=7.93917)	20.3885	23.4472	27.1164	20.2755	17.4832	15.7703	18.9704	16.72	17.8865	6.84075	16.2113	15.0924	13.3934	15.4643	10.277	20.1315	10.6739	13.8575
1700	L1470 (m/z=758.606611; rt=7.93839)	17.7219	23.8282	27.6961	18.6237	17.8824	16.2165	16.7725	16.7041	16.8794	18.9548	16.2941	14.7404	10.1339	14.9658	10.5475	17.7932	10.3254	13.9201
1701	L1477 (m/z=759.568946; rt=7.9388)	20.582	23.8902	26.4963	20.5493	17.3047	16.5534	19.012	16.3395	18.6242	6.36924	16.1784	14.3239	12.1783	15.3767	10.4982	21.3091	10.9105	13.504
1702	L1487 (m/z=252.523965; rt=7.93904)	21.0128	23.3066	27.5326	20.4451	17.7708	16.1103	18.9701	16.3802	17.4892	6.36786	16.2163	14.7854	13.1004	15.5853	10.2659	20.1037	10.7409	13.8167
1703	L1480 (m/z=379.28644; rt=7.93884)	18.2063	23.5768	27.3724	18.596	17.9197	16.3951	17.1019	16.9049	17.4246	18.8033	16.3291	14.9924	10.4301	14.9456	10.3898	16.8624	10.3239	13.4257
1704	L1491 (m/z=379.280692; rt=7.93915)	18.2063	23.5768	27.3724	18.596	17.9197	16.3951	17.1019	16.9049	17.4246	18.8033	16.3291	14.9924	10.4301	14.9456	10.3898	16.8624	10.3239	13.4257
1705	L1493 (m/z=759.538736; rt=7.93916)	20.741	22.9455	26.0735	20.0703	17.4454	16.5674	19.2442	16.2077	18.3628	6.72393	16.6278	14.6521	12.2645	15.3968	10.6277	20.9561	11.3767	13.7166
1706	L1509 (m/z=378.264178; rt=7.94069)	18.436	23.0718	26.2183	18.5221	17.5246	16.3635	18.2963	17.4555	18.6913	17.659	16.9351	15.351	11.8234	15.2252	9.79851	15.2631	9.78773	13.5774
1707	L1503 (m/z=252.519585; rt=7.93977)	21.0001	22.6574	27.0354	19.9724	17.7515	16.3821	19.1395	16.7172	18.0989	7.26564	16.7163	14.9959	14.1528	15.6381	9.9596	18.4695	10.5194	13.5281
1708	L1506 (m/z=252.182656; rt=7.94018)	19.5277	23.0431	26.3283	19.8972	17.1651	16.1136	20.3208	17.0151	18.1031	7.09661	16.765	15.1164	14.2312	15.4131	9.83972	18.9264	10.5986	14.4988
1709	L1504 (m/z=378.767913; rt=7.93996)	18.8682	24.5642	28.1652	18.4408	17.9995	16.3481	16.7492	16.907	18.1598	19.7405	16.4708	15.242	11.5846	14.7292	9.53665	14.6168	9.32929	12.5483
1710	L1501 (m/z=189.139591; rt=7.93951)	20.5193	24.0304	26.8361	20.8443	17.4099	16.0997	20.0723	17.2286	17.6158	6.56222	16.1198	15.5041	13.1744	15.0317	9.8937	18.8275	10.1796	14.0506
1711	L1472 (m/z=252.858794; rt=7.93866)	19.6959	23.4676	27.406	19.5965	17.5521	16.0954	18.3266	16.7267	17.6673	10.8021	16.6522	15.1507	11.7232	15.0864	10.171	19.8558	10.5151	13.5098
1712	L1471 (m/z=189.142879; rt=7.93847)	18.3855	23.3752	27.4736	17.9843	17.404	15.5384	17.0918	16.3324	17.0054	10.5917	16.0585	15.3073	13.1264	15.4847	10.0753	22.8203	11.3453	14.6
1713	L1496 (m/z=252.855676; rt=7.93923)	19.7176	23.5113	27.227	19.6339	17.3246	16.3901	18.8425	16.6893	17.7006	11.0928	16.9865	15.1688	12.3623	14.9443	10.0169	18.3509	10.544	13.4965
1714	L1495 (m/z=151.313088; rt=7.93923)	19.2596	24.1438	28.127	19.6199	17.4308	15.6937	19.9797	16.7904	17.2857	10.6209	16.6145	14.5795	11.7236	14.9744	10.2683	18.7964	10.0461	14.0459
1715	L1484 (m/z=760.571578; rt=7.93895)	19.0777	22.691	26.4117	18.8013	17.9966	15.8942	17.5633	17.4647	16.739	10.958	16.4889	14.8799	13.3917	14.5248	9.73142	20.2079	10.834	16.3439
1716	L1481 (m/z=379.784437; rt=7.93891)	19.9755	24.1949	27.8797	18.6432	17.1433	16.39	17.1469	16.5105	18.4807	10.5546	15.9376	14.4531	12.6367	15.1748	9.70196	21.0431	11.0389	13.0945
1717	L1476 (m/z=379.788124; rt=7.93878)	20.2046	24.1949	27.8797	18.8571	17.1433	16.39	17.3436	16.5105	18.4807	10.374	15.9376	14.4531	11.9361	15.1748	9.70196	21.2845	11.0389	13.0945
1718	L1488 (m/z=189.390513; rt=7.93905)	18.6286	24.6303	29.2069	19.6674	18.1127	16.6872	17.8333	16.395	16.9084	11.8877	15.922	15.0327	15.4657	14.7569	9.36116	16.5173	10.183	12.8037
1719	L1469 (m/z=189.393535; rt=7.93775)	16.8445	21.1484	24.2625	16.3579	17.0566	16.1229	17.8698	16.3438	16.7132	12.328	16.5713	14.9715	16.7128	15.8364	10.2647	19.887	13.0435	17.6652
1720	L1507 (m/z=151.311605; rt=7.94023)	19.2786	24.1192	26.1723	16.6229	17.1593	15.5557	19.8325	16.3259	17.9296	11.7096	17.2512	15.2432	15.1155	14.5498	9.68858	17.4408	10.5945	15.4107
1721	L1505 (m/z=184.073559; rt=7.94015)	19.1844	19.1934	25.0667	18.419	19.0411	16.6584	20.6419	17.9176	17.6866	13.948	17.558	15.8349	13.3537	15.8454	12.7845	14.453	10.4444	11.9688
1722	L1511 (m/z=778.543122; rt=7.94479)	21.8037	21.5528	19.2926	24.2093	22.7343	24.2663	22.0124	21.2234	21.5167	9.52925	17.4582	18.451	14.7873	13.1123	11.7991	7.658	3.91906	4.67434
1723	L1513 (m/z=778.529461; rt=7.94509)	21.8037	21.5528	19.2926	24.2093	22.7343	24.2663	22.0124	21.2234	21.5167	9.52925	17.4582	18.451	14.7873	13.1123	11.7991	7.658	3.91906	4.67434
1724	L1512 (m/z=779.530473; rt=7.94503)	23.0282	21.753	19.2512	24.1877	23.4895	24.5843	23.7765	20.1593	20.6654	8.57084	17.7789	18.7601	12.9092	13.2052	12.3051	7.52765	3.61413	4.43393
1725	L1510 (m/z=779.550194; rt=7.94464)	23.0077	21.8134	19.0437	24.1661	23.5057	24.6012	23.7553	20.4023	20.7399	8.56321	17.627	18.9924	12.8977	13.0745	12.1731	7.60999	3.57711	4.44975
1726	L1521 (m/z=758.564651; rt=7.96812)	18.6792	25.846	26.2975	18.9061	15.7433	15.8219	18.7068	15.4569	17.2918	6.69684	16.7052	15.3768	13.0957	15.1014	9.47339	23.9154	11.1472	15.7386
1727	L1517 (m/z=252.858566; rt=7.96726)	19.5384	26.2712	26.7656	17.577	15.6354	15.9731	18.0178	15.3408	16.8222	9.43821	16.8085	15.4344	11.0335	15.5478	9.17652	24.3951	10.3963	15.8283
1728	L1515 (m/z=756.688772; rt=7.96601)	15.6984	26.6779	27.9767	13.9211	14.7033	15.8339	15.688	15.1228	16.7965	19.2368	18.3362	14.4812	13.3089	14.5219	8.88218	22.1468	10.6379	16.0296
1729	L1514 (m/z=379.790352; rt=7.965)	20.7433	29.3558	26.3364	20.8814	15.274	16.9002	17.1694	15.5595	18.1281	8.8405	15.7198	15.54	8.89983	14.0573	8.27915	23.4656	10.0337	14.8162
1730	L1522 (m/z=718.578182; rt=7.96899)	24.541	31.2856	28.7157	23.279	17.1539	15.803	20.18	15.1726	18.9717	5.9394	15.4499	13.3955	9.8776	10.5079	9.6254	16.183	10.4301	13.4888
1731	L1516 (m/z=238.860426; rt=7.96641)	25.9038	29.7697	30.0157	22.8406	17.6445	15.5607	18.0009	15.7584	19.2404	9.22792	14.7313	14.0311	8.37452	10.2467	9.43681	15.6523	11.8495	11.7153
1732	L1518 (m/z=358.788451; rt=7.96737)	25.6982	31.188	29.1796	23.3099	17.0565	14.9757	18.4145	15.6086	19.058	8.72066	14.6659	13.815	7.90991	11.3425	9.82597	15.9469	10.1384	13.1458
1733	L1519 (m/z=768.532674; rt=7.96769)	5.70458	6.91375	6.24273	6.16543	5.69223	3.90675	8.76523	5.02312	7.50285	5.59747	13.125	10.3484	14.6431	18.6948	13.4584	59.1242	50.5511	58.5408
1734	L1532 (m/z=795.546569; rt=8.04416)	5.46611	7.66105	5.05255	5.0717	6.39853	5.48325	6.52172	6.14003	5.56889	3.24753	8.06393	6.50894	10.7494	14.4231	9.32643	68.9436	57.3134	68.0599
1735	L1520 (m/z=769.549082; rt=7.96786)	4.66983	7.72897	5.94876	6.5522	6.12664	4.52038	7.67907	6.43716	9.1874	6.3215	11.3549	11.2303	12.6992	18.7158	13.2028	62.0782	49.6366	55.9103
1736	L1528 (m/z=923.524171; rt=7.99629)	5.74308	9.5434	7.66225	7.56142	5.57133	5.71189	8.51707	8.56498	13.2362	10.414	18.3515	15.8356	17.5302	8.50121	16.9501	50.2342	49.4676	40.6039
1737	L1530 (m/z=923.485324; rt=7.99685)	7.10885	10.2421	8.00382	8.67338	6.10047	6.34514	8.99734	9.37999	13.3913	7.45179	18.3392	15.7275	18.0386	8.86746	17.7256	49.73	47.0709	38.8067
1738	L1527 (m/z=924.52559; rt=7.99616)	6.04478	9.28459	8.12578	7.87943	6.41841	5.31427	8.82085	7.92411	12.4372	7.54098	17.9811	16.4307	17.6825	9.07315	17.1122	52.0314	49.3187	40.5798
1739	L1529 (m/z=924.496896; rt=7.99679)	6.76857	9.59042	8.0654	8.44322	6.3729	6.05922	8.86468	8.03671	12.5496	7.62769	18.1042	16.636	17.7489	9.19029	17.476	50.547	48.7055	39.2138
1740	L1525 (m/z=925.527831; rt=7.99541)	4.98828	7.38407	6.0612	8.02816	5.53875	5.71605	8.86398	7.83766	11.4235	7.35916	15.8423	14.7124	17.2615	11.0741	16.5165	53.4989	52.3232	45.5703
1741	L1526 (m/z=925.507558; rt=7.99564)	4.98828	7.5486	6.31229	8.02816	5.66216	5.95284	8.86398	8.01229	11.8967	7.35916	16.1952	15.3219	17.2615	11.3208	17.2007	53.4989	51.2609	43.3155
1742	L1524 (m/z=926.508072; rt=7.9954)	6.77623	6.35231	9.26707	6.08476	7.09301	4.99419	10.1901	8.75443	7.87779	9.76571	9.61548	11.6634	12.3313	11.2343	15.0174	54.8519	56.9505	51.1802
1743	L1523 (m/z=926.535366; rt=7.99465)	6.45583	4.87252	8.30785	4.67552	7.90858	4.47725	9.70832	8.43646	7.06237	9.92459	9.26622	11.4428	11.7483	11.2283	13.6165	57.4875	58.2879	55.0933
1744	L1531 (m/z=794.530419; rt=8.02115)	9.027	11.3108	8.66671	9.85929	10.6343	8.56403	7.64101	9.00263	6.62632	3.22518	6.487	5.04543	9.8035	11.5762	7.39116	60.444	50.9891	63.7063
1745	L1558 (m/z=794.582634; rt=8.05743)	3.47527	6.47824	5.99022	3.72285	4.50835	2.52086	6.47826	5.20208	6.24984	10.2889	9.33608	6.98084	10.3073	14.9482	8.6225	65.7275	59.527	69.6357
1746	L1533 (m/z=958.652059; rt=8.05091)	5.68972	8.05606	7.6605	6.48156	5.85312	4.12378	10.2285	7.4009	8.76378	5.57566	11.7302	10.2781	13.8842	17.4065	12.2384	58.1404	49.5531	56.9355
1747	L1560 (m/z=795.586014; rt=8.05749)	3.514	6.78577	6.20085	3.65112	4.67311	2.51484	6.15715	5.3887	6.44502	10.3161	9.26478	7.26974	10.0127	15.0652	8.95667	66.3489	58.8224	68.6129
1748	L1536 (m/z=958.614693; rt=8.05113)	5.68119	8.59495	7.2629	6.50616	6.38527	4.49485	10.7381	8.29671	9.3872	5.74823	11.4565	10.7133	14.0181	17.4605	12.8522	57.3082	47.806	55.2895
1749	L1534 (m/z=959.657687; rt=8.05104)	5.14953	8.33253	9.28155	6.44988	5.89741	4.11244	8.5578	7.42846	8.71012	5.51057	12.0207	10.6607	14.9365	18.275	12.1843	59.3957	48.0459	55.0509
1750	L1535 (m/z=959.618261; rt=8.05107)	5.23513	8.03166	9.30667	6.5044	5.85509	4.37088	8.61285	7.51687	8.85118	5.7336	13.3954	11.5541	15.745	18.2617	12.8976	58.169	46.9393	53.0197
1751	L1564 (m/z=799.522707; rt=8.05962)	4.92769	7.03782	7.91849	6.38206	6.6165	5.67709	9.47381	8.25214	11.9703	12.773	13.8829	14.3491	14.958	18.2953	18.6104	51.4854	45.9154	41.4747
1752	L1562 (m/z=799.541949; rt=8.05942)	4.98402	6.91735	7.88123	6.27037	6.45732	5.5585	9.32665	8.14831	11.8828	12.8071	13.7477	14.2523	14.7184	18.3241	18.0552	51.8936	46.4052	42.37
1753	L1548 (m/z=782.572339; rt=8.05672)	16.3967	22.9887	27.471	15.784	13.7846	11.4008	16.1631	13.1519	16.0409	6.58999	14.8578	13.3822	14.1177	17.567	9.31871	30.9485	17.65	22.3864
1754	L1546 (m/z=783.576718; rt=8.05664)	16.3368	23.1077	27.7677	15.6378	13.953	11.1495	16.4866	12.8564	15.6887	6.42121	14.7717	13.4094	14.1635	17.4849	9.34817	30.9541	17.8264	22.6365
1755	L1544 (m/z=784.580576; rt=8.0566)	16.9722	22.4714	27.8799	16.8528	13.9132	11.2932	15.996	13.0371	15.4442	5.98324	15.067	13.5039	14.3773	17.6752	9.14699	29.8185	17.8361	22.7319
1756	L1552 (m/z=391.287414; rt=8.05684)	13.8242	22.9084	28.2575	12.8128	13.844	11.0767	13.2608	13.171	15.7596	21.2151	14.9816	13.0507	11.1747	17.2341	9.13876	27.7123	17.8608	22.7168
1757	L1555 (m/z=784.556155; rt=8.05695)	17.2657	22.337	27.5643	16.8169	14.1136	11.5832	16.2262	13.3091	15.679	6.08465	15.1637	13.6865	14.4863	17.6944	9.28487	29.1204	17.3822	22.202
1758	L1551 (m/z=782.513908; rt=8.05675)	15.2967	22.7736	26.5425	14.9437	13.3895	11.1744	15.8433	12.7866	16.2543	6.09412	15.1054	13.888	13.4321	17.8568	9.29842	34.3901	18.088	22.8424
1759	L1547 (m/z=783.525166; rt=8.05667)	16.3135	23.4395	27.678	15.7162	13.8062	11.1041	16.3797	13.0312	16.0971	6.36097	14.7415	13.5206	14.3111	17.5138	9.3082	30.9186	17.4677	22.2919
1760	L1543 (m/z=391.792694; rt=8.05649)	16.024	23.1295	28.3273	14.8482	14.0547	10.9706	16.5747	12.9168	15.3811	7.61649	14.85	13.416	13.8965	17.2767	9.43439	31.0401	17.7721	22.4706
1761	L1554 (m/z=391.786568; rt=8.05694)	16.024	23.1295	28.3273	14.8482	14.0547	10.9706	16.5747	12.9168	15.3811	7.61649	14.85	13.416	13.8965	17.2767	9.43439	31.0401	17.7721	22.4706
1762	L1549 (m/z=260.861434; rt=8.05672)	16.4278	23.1271	27.4772	14.9204	13.7035	11.2998	16.2069	13.0002	15.8554	6.93808	14.9611	13.4855	13.7953	17.4277	9.41942	31.7115	17.7804	22.4626
1763	L1556 (m/z=785.568468; rt=8.05716)	16.6442	21.7149	28.944	15.701	13.7332	11.2947	17.4297	13.3562	15.4631	7.96141	16.1935	12.5184	15.751	17.1642	10.0696	26.5126	17.838	21.7101
1764	L1553 (m/z=785.583208; rt=8.05686)	16.4187	21.7934	29.5219	16.2067	13.6048	10.9814	17.1936	13.2029	15.3036	7.85354	16.0769	12.3624	15.6997	17.0342	9.76593	26.6278	18.2877	22.0648
1765	L1545 (m/z=261.19637; rt=8.05663)	17.7468	22.7303	27.3069	15.5669	14.3855	11.2701	17.3382	13.1827	15.482	6.29484	14.9342	13.6378	14.5791	17.1219	9.80023	28.4741	17.6454	22.5031
1766	L1561 (m/z=261.193075; rt=8.05762)	17.9358	22.701	26.5375	15.5414	15.6696	11.8903	17.1397	13.9577	15.8767	5.99076	14.9251	14.0922	14.337	16.9676	10.846	29.0553	15.779	20.7572
1767	L1559 (m/z=260.855947; rt=8.05743)	17.8202	23.4924	26.8005	17.0671	15.1985	12.1723	18.6064	13.9299	16.7906	6.14638	15.8013	13.8571	14.7919	16.9623	10.9	25.568	14.6156	19.4795
1768	L1550 (m/z=391.273037; rt=8.05672)	16.2835	23.325	26.7121	14.4628	14.3787	11.9533	15.6476	13.1285	16.5625	8.7369	15.0779	13.9059	15.9395	17.8453	9.34347	28.9297	16.2445	21.5227
1769	L1538 (m/z=392.295469; rt=8.05554)	17.1133	25.0693	32.127	16.0564	13.3569	9.68599	16.3095	11.718	14.8477	6.93761	15.3738	11.7238	14.5019	17.3728	7.49668	29.0813	17.1091	24.1188
1770	L1537 (m/z=392.289323; rt=8.05544)	17.6671	25.0693	32.3008	16.576	13.3569	9.73841	16.8372	11.718	14.928	7.0146	15.3738	11.7873	14.9712	17.3728	6.9961	26.9339	17.1091	24.2494
1771	L1557 (m/z=785.544287; rt=8.05741)	16.8287	21.171	25.3791	15.8128	14.5058	12.9462	15.7309	13.7981	16.5541	9.27429	15.8297	13.4389	13.1688	17.3436	10.609	29.1846	17.3517	21.0727
1772	L1572 (m/z=714.510935; rt=8.1307)	25.5831	35.3175	43.7549	28.7482	19.3755	22.62	16.4688	15.9491	17.9644	18.4859	16.3247	10.7147	7.19899	11.1184	3.44921	3.51497	1.91482	1.49675
1773	L1574 (m/z=714.48344; rt=8.13094)	26.0915	35.5013	43.5007	28.2686	19.2162	22.7378	17.2919	15.8711	18.0019	17.7766	16.1094	10.5596	7.00594	11.2303	3.72454	3.56543	2.07176	1.47536
1774	L1571 (m/z=715.516197; rt=8.13069)	24.4012	34.2348	43.1009	28.7184	20.2233	22.2548	16.6414	15.895	18.3664	17.7672	16.1354	10.6857	7.32072	11.134	3.52177	5.151	2.3774	2.07032
1775	L1573 (m/z=715.497715; rt=8.13092)	25.5027	34.2268	42.7354	28.4157	20.2793	22.4309	16.3885	15.8853	18.4881	17.4254	16.1029	10.7583	7.30494	11.1136	3.53125	4.96267	2.39202	2.05603
1776	L1540 (m/z=804.561193; rt=8.05621)	19.5395	26.064	31.8875	19.6068	18.9411	16.58	20.0426	17.8825	20.6089	10.2153	16.2239	15.958	16.4401	14.5796	9.31319	14.1556	6.30893	5.65237
1777	L1541 (m/z=804.553813; rt=8.05645)	19.5395	26.064	31.8875	19.6068	18.9411	16.58	20.0426	17.8825	20.6089	10.2153	16.2239	15.958	16.4401	14.5796	9.31319	14.1556	6.30893	5.65237
1778	L1539 (m/z=804.58087; rt=8.05584)	19.1676	26.3865	32.9189	19.6591	18.7313	15.9218	20.4749	17.5604	20.641	9.02864	16.3245	15.836	17.1343	14.5208	9.14627	14.5354	6.4765	5.53588
1779	L1542 (m/z=805.559321; rt=8.05647)	16.6124	26.1061	32.4212	18.6854	18.2051	16.8245	20.7573	18.7738	19.6345	12.6871	15.7145	15.0686	16.4805	13.4966	9.18339	14.7773	7.70393	6.86775
1780	L1563 (m/z=838.575498; rt=8.05947)	11.3283	5.90809	14.6172	8.34505	6.1689	10.8226	9.49354	8.26565	5.81179	11.022	13.0736	18.2366	24.7216	41.9879	20.665	35.0895	24.5958	29.8468
1781	L1565 (m/z=926.54402; rt=8.11231)	9.25196	12.7039	8.36325	11.9818	8.3288	3.99461	8.10223	9.92398	7.25182	8.01653	14.3269	8.07746	8.83941	4.18988	6.65582	53.8081	50.5265	65.657
1782	L1567 (m/z=926.511963; rt=8.11459)	9.24351	13.6906	8.82129	13.5669	8.55113	5.3843	9.55371	10.5798	7.03485	8.15246	13.8356	7.70464	8.73372	4.23679	6.49177	50.7497	49.1061	64.5631
1783	L1566 (m/z=925.542262; rt=8.11256)	7.14125	11.1802	4.86648	9.57174	7.06313	4.25115	7.1543	8.03274	7.24581	4.35859	13.3671	6.02647	9.10592	3.17622	6.78354	62.6682	57.1806	70.8265
1784	L1568 (m/z=925.495717; rt=8.11728)	12.1626	19.2822	7.58383	13.4256	12.7705	6.97489	7.43408	10.0659	7.82981	8.6641	17.024	5.12597	8.38688	4.43773	3.94962	49.9267	36.4196	68.5359
1785	L1569 (m/z=858.671067; rt=8.12381)	29.4736	29.7149	32.4187	24.6301	19.3174	14.2914	17.2809	13.8186	17.5638	8.05379	13.8373	12.9095	8.385	10.5006	7.92477	12.1766	12.8113	14.8919
1786	L1570 (m/z=859.674689; rt=8.12564)	28.5714	34.0494	34.9409	22.007	18.8928	12.7781	17.5248	13.0234	18.3121	7.76037	12.0911	11.6576	9.29084	9.973	7.82656	14.8456	11.9704	14.4848
1787	L1575 (m/z=744.557123; rt=8.15523)	21.2711	24.2728	30.6058	18.8706	15.8233	14.6283	18.2001	15.326	15.8386	8.49593	15.1005	13.0801	11.3706	16.1584	8.24566	21.7917	13.319	17.6016
1788	L1576 (m/z=745.561096; rt=8.15532)	18.8405	24.9537	32.0296	17.4195	15.7241	13.5787	18.8635	15.8054	16.2328	9.02108	16.1687	12.1299	14.1737	15.1008	7.96935	21.6818	12.2473	18.0597
1789	L1583 (m/z=891.56871; rt=8.18422)	5.55504	9.31636	9.55283	7.12572	6.24967	4.6143	9.31785	7.5852	10.1087	6.67269	12.6694	11.2961	13.8485	13.6231	14.0408	57.4802	50.5563	50.3873
1790	L1584 (m/z=891.532147; rt=8.18435)	6.35494	9.58987	9.69509	7.9696	6.80785	5.0977	9.57523	7.85169	10.44	7.27493	13.0562	11.6526	13.9699	13.486	14.3741	54.8553	49.2084	48.7406
1791	L1581 (m/z=892.571884; rt=8.18367)	7.38373	8.79833	11.1902	8.51281	7.08829	5.55765	8.89948	8.07967	10.2425	7.38667	12.1712	10.5726	12.5789	15.443	12.4166	55.2384	48.4195	50.0204
1792	L1577 (m/z=887.572691; rt=8.16434)	8.96028	9.64465	17.4696	7.98631	10.5068	5.76283	11.5724	9.05203	9.35097	5.85693	9.15887	8.50178	8.50802	15.6693	10.945	57.1161	45.9684	47.9698
1793	L1582 (m/z=892.535418; rt=8.18371)	7.65301	10.4142	11.6808	8.12433	7.57886	5.25148	10.7757	8.39916	10.9441	7.07788	12.2466	11.0946	13.1361	15.5629	13.1406	53.233	45.7983	47.8884
1794	L1578 (m/z=887.54487; rt=8.16476)	9.18595	9.73938	17.574	8.65517	10.6135	5.95978	12.3171	9.21829	9.2552	5.81723	8.92344	9.11728	9.2227	15.6949	11.3028	54.8018	45.8105	46.7909
1795	L1579 (m/z=888.576241; rt=8.16525)	8.27002	10.1814	14.6604	9.5059	10.5625	5.85423	12.5935	9.73647	10.9034	6.97747	7.15338	10.8621	10.8365	16.8889	10.8247	51.8166	45.4773	46.8952
1796	L1580 (m/z=888.55572; rt=8.1654)	8.2561	10.3866	15.2094	9.7936	10.753	5.88673	12.5995	9.70164	10.9532	6.92975	7.09849	11.0543	10.9916	17.7646	11.2656	51.4295	44.2956	45.6307
1797	L1593 (m/z=932.633439; rt=8.24392)	9.02334	7.23553	8.79413	7.08749	5.21965	4.13072	10.9763	5.39153	6.29553	6.68858	12.1596	7.93211	13.9102	17.1399	10.2799	52.314	52.8538	62.5676
1798	L1594 (m/z=932.633945; rt=8.24532)	9.02334	7.23553	8.79413	7.08749	5.21965	4.13072	10.9763	5.39153	6.29553	6.68858	12.1596	7.93211	13.9102	17.1399	10.2799	52.314	52.8538	62.5676
1799	L1590 (m/z=909.542215; rt=8.2406)	4.65285	6.34308	6.88383	7.6562	5.23439	3.34872	6.16309	5.31916	7.52412	6.00964	14.3288	9.60543	11.0229	5.8648	10.7661	64.4953	62.9098	61.8718
1800	L1592 (m/z=909.508331; rt=8.24162)	4.45205	6.20948	6.47413	7.11162	5.23252	5.02363	5.43154	5.11486	9.1592	5.86135	14.651	12.4062	17.777	8.63717	10.4915	59.3664	60.155	56.4453
1801	L1589 (m/z=923.524473; rt=8.2182)	6.23306	5.42257	9.45278	8.53102	6.20969	5.90998	10.0737	8.81276	10.7057	7.98202	12.5156	17.5819	12.7766	12.8565	21.2096	54.4035	54.1829	35.1401
1802	L1586 (m/z=924.498092; rt=8.19986)	10.0848	8.47313	14.3086	9.05383	8.12752	9.9273	10.6154	6.72393	12.9568	9.81131	10.3969	15.9095	11.6791	11.8383	19.0937	48.7556	54.4402	27.8041
1803	L1585 (m/z=924.524549; rt=8.19978)	9.34334	7.94586	12.2615	8.82143	7.00357	8.50703	9.78065	6.66802	13.2826	9.09578	10.4222	16.098	11.8773	11.7866	19.584	51.0815	56.1737	30.2668
1804	L1587 (m/z=923.486904; rt=8.20007)	8.96811	5.58072	8.24539	10.65	9.50113	6.87025	9.813	10.7667	9.54928	8.85921	11.5504	15.2624	12.3689	13.3154	18.6045	49.3409	49.2857	41.4682
1805	L1588 (m/z=437.730534; rt=8.21713)	11.6167	9.35281	19.2607	16.8916	18.9556	19.5835	13.556	17.8172	14.3039	20.8803	22.6303	16.3635	19.6494	18.0299	16.5757	17.406	13.2141	13.9127
1806	L1595 (m/z=740.542361; rt=8.24757)	15.9565	27.3529	33.9831	21.6515	13.8337	20.6126	12.2085	11.8633	16.6485	4.27327	13.0253	9.00414	11.7667	18.4629	2.77698	34.1435	15.462	16.9746
1807	L1591 (m/z=740.520903; rt=8.2415)	19.7187	30.4877	34.9893	25.1752	15.7869	21.1197	14.9522	13.5137	17.4457	5.01964	14.8024	9.66282	8.16474	13.1003	3.73272	26.9695	12.309	13.0497
1808	L1600 (m/z=756.556074; rt=8.28772)	19.3393	22.8234	26.1844	15.5488	14.9993	12.9522	16.7495	11.8665	13.8196	7.28173	13.8569	13.8972	12.9845	18.4913	9.70601	28.0961	17.9628	23.4405
1809	L1601 (m/z=757.559572; rt=8.28782)	15.2981	23.7901	25.7571	18.7351	14.541	12.9338	16.7288	14.8063	14.8403	9.97089	11.9325	13.4483	19.9476	18.4532	9.34948	19.3196	16.4769	23.671
1810	L1597 (m/z=757.559344; rt=8.2746)	15.9881	23.8094	25.7571	19.5801	14.5528	12.9338	17.4832	14.8183	14.8403	9.59849	11.8609	13.4483	17.1592	18.4682	9.34948	20.191	16.4903	23.671
1811	L1596 (m/z=808.588552; rt=8.27076)	15.077	20.0516	24.8526	15.2107	14.415	11.0971	13.7722	13.8429	13.816	9.05763	15.7025	13.7252	16.5919	17.9418	9.03702	30.2905	18.0461	27.472
1812	L1599 (m/z=903.568455; rt=8.27632)	9.87505	8.88749	11.9023	8.51188	8.17465	7.67318	9.48017	7.27558	7.43907	10.6047	8.32933	9.28602	9.52574	7.80546	12.085	52.0024	59.5275	51.6145
1813	L1598 (m/z=903.548968; rt=8.2763)	9.73729	7.901	12.1214	8.46912	7.54039	7.1402	9.50114	7.57516	7.52029	10.6282	6.87798	9.45702	9.5468	8.12686	12.3075	52.1175	61.9786	51.4535
1814	L1603 (m/z=891.568964; rt=8.29586)	6.16377	6.71329	10.9825	6.95174	5.02015	10.1501	8.17112	6.20556	10.0025	5.86309	11.2889	12.268	14.2585	11.2572	22.0319	58.5918	59.5149	34.565
1815	L1602 (m/z=891.532837; rt=8.29577)	6.57637	7.30461	11.3935	8.04415	6.96809	11.2418	7.1104	4.88437	11.5923	6.15953	12.9683	11.9561	14.1333	10.8611	21.7497	57.9763	57.0135	32.0666
1816	L1606 (m/z=934.569132; rt=8.3706)	16.5404	11.6956	21.4623	10.2815	15.6182	8.22527	17.9224	12.8902	12.3062	9.5058	15.4544	14.7976	11.401	24.783	18.6899	34.3488	19.5585	24.5187
1817	L1604 (m/z=934.597963; rt=8.35743)	16.7641	11.8609	19.5014	10.0457	15.8569	7.88476	18.0273	12.2636	11.3889	9.61888	15.6062	13.4985	11.7603	24.4208	17.2772	33.7837	19.9916	30.4492
1818	L1605 (m/z=887.567789; rt=8.36938)	8.87445	11.8217	14.0103	7.1951	10.1444	6.35148	12.6723	9.49236	8.55065	8.98876	7.74656	9.2423	10.326	16.7036	9.826	51.9434	44.0914	52.0193
1819	L1607 (m/z=437.752312; rt=8.39698)	17.0153	18.3412	18.8524	18.7829	15.4032	16.4547	12.2654	12.6465	16.8575	21.9566	19.0778	16.052	8.69526	15.2871	14.0556	21.2845	19.2441	17.7278
1820	L1610 (m/z=939.515233; rt=8.42451)	4.98689	4.60716	3.10628	4.25164	3.30251	1.73944	6.06387	4.3337	3.63699	5.77952	8.21794	4.7111	12.8349	19.5713	6.55505	66.0832	59.9673	80.2511
1821	L1612 (m/z=940.518515; rt=8.42462)	4.92913	4.1566	2.89258	4.05269	3.43673	1.57558	6.02612	4.00727	3.75631	5.93285	8.0182	5.03865	13.3297	19.7671	6.58527	65.7295	60.6141	80.1516
1822	L1613 (m/z=941.518156; rt=8.42505)	6.19329	4.52861	3.04107	4.26132	3.16156	1.52787	6.2819	4.61818	4.02648	6.44183	8.11946	4.46118	12.004	19.0661	5.85467	64.8177	60.5061	81.0887
1823	L1608 (m/z=939.570927; rt=8.42245)	4.69288	4.29686	2.92686	4.03729	2.89341	1.75206	5.98945	4.45319	3.5452	5.81861	7.93274	4.54465	13.2275	19.7884	6.09821	66.2342	60.6354	81.133
1824	L1611 (m/z=941.564783; rt=8.42457)	6.20312	4.7994	2.84792	4.07634	3.12526	1.02107	6.46149	4.62033	3.85817	6.66756	7.60153	4.64579	13.9267	20.0774	6.30162	62.6648	59.776	81.3254
1825	L1609 (m/z=940.576795; rt=8.42258)	4.22153	4.49676	2.64635	3.20337	3.16628	0.200368	6.1348	3.96909	3.8285	5.85083	8.54992	4.70802	13.8032	20.1432	6.06466	66.7862	59.6747	82.5521
1826	L1616 (m/z=766.563327; rt=8.43323)	6.54017	4.18289	11.7917	9.09927	5.12274	9.34263	10.7486	6.08468	9.53565	8.94145	8.88636	17.1726	23.3362	51.2852	19.7559	41.3343	24.4381	32.4015
1827	L1614 (m/z=766.535652; rt=8.43285)	6.12887	3.75795	11.4212	8.5186	4.89853	9.25564	10.563	5.7868	8.95601	8.9874	8.91478	17.7126	23.5494	51.4453	19.2963	42.2527	25.1966	33.3583
1828	L1617 (m/z=767.567724; rt=8.43336)	6.44908	3.93805	10.8402	8.60004	5.16507	9.51251	9.65695	6.64841	14.1912	9.27485	8.35525	16.0841	20.6716	49.8485	16.5953	45.3475	26.0447	32.7767
1829	L1615 (m/z=767.547125; rt=8.43303)	6.35663	3.58489	10.4932	6.03655	3.64406	9.61872	8.1079	4.91767	14.1391	10.0277	8.74607	13.7382	21.2584	51.7587	17.2425	48.2129	27.3486	34.7683
1830	L1619 (m/z=732.559317; rt=8.47383)	25.844	23.9133	30.9187	23.4264	17.2156	18.5836	15.9305	14.5761	17.1664	6.80562	17.3923	13.3397	11.3764	15.2621	8.58722	16.6171	11.6406	11.4044
1831	L1620 (m/z=732.538311; rt=8.47433)	25.5831	24.7542	30.6034	22.8444	17.4443	18.6826	16.0479	14.7511	17.3641	7.60298	16.675	13.2237	11.4507	14.6224	8.67404	16.471	11.7529	11.4521
1832	L1618 (m/z=733.560851; rt=8.47337)	23.1634	22.0904	34.3295	18.9371	15.6471	15.5174	20.4036	19.4844	20.276	12.915	13.7517	13.6047	12.2565	18.1629	10.2403	12.3244	10.8635	6.03208
1833	L1621 (m/z=771.547333; rt=8.47575)	14.2027	22.5228	31.0279	15.9196	16.0488	16.2773	21.7399	13.0822	18.8506	10.6625	15.8643	14.0712	19.9632	20.493	10.3258	17.5121	11.9889	9.4471
1834	L1622 (m/z=770.57505; rt=8.48277)	20.448	28.9947	34.4688	19.0733	17.4443	15.7438	18.8031	15.5035	18.6323	11.2293	15.5524	14.6609	14.9808	11.8289	8.99548	15.4654	10.6761	7.49869
1835	L1623 (m/z=770.55412; rt=8.48315)	19.745	28.8083	33.9703	18.7197	17.5117	15.4912	18.2343	15.1162	18.3174	10.5206	16.1404	14.5127	13.7299	11.5219	9.15719	19.0504	10.9014	8.55119
1836	L1624 (m/z=771.575135; rt=8.48323)	20.6729	24.0018	29.7409	18.4435	16.949	17.5769	21.8358	14.4562	17.9272	11.1254	17.6981	15.7871	12.128	19.0454	9.86469	15.7945	7.84951	9.10332
1837	L1625 (m/z=923.522508; rt=8.492)	4.75774	1.45146	1.27065	3.28358	1.13481	0.764974	5.14237	1.45167	1.08633	6.35824	1.96139	1.89315	4.56784	37.1194	3.35489	75.8902	56.8812	91.63
1838	L1626 (m/z=923.485406; rt=8.49256)	5.27464	2.11659	2.61115	4.82957	2.66068	2.25533	7.9599	2.92304	3.04746	8.79019	2.90645	3.26521	4.09864	51.5257	6.50512	69.0471	37.8676	82.3157
1839	L1628 (m/z=904.572552; rt=8.55178)	10.6515	8.97068	12.9638	11.1957	7.33398	6.68225	10.3994	10.2822	5.81679	11.5634	9.9734	6.43825	9.33927	11.9333	8.4801	46.8508	51.5064	59.6188
1840	L1627 (m/z=904.542929; rt=8.5506)	10.8888	10.6379	13.3191	10.3133	7.34624	8.0001	10.8855	12.1931	6.64838	10.0546	11.1473	8.1989	11.159	10.9985	8.155	46.6987	47.6769	55.6785
1841	L1630 (m/z=903.569045; rt=8.55883)	10.4807	5.89881	9.40397	9.66189	6.56578	5.84456	10.3836	6.67874	5.44723	9.75574	6.23648	6.31134	8.3262	11.48	9.0997	51.3918	63.1402	63.8932
1842	L1629 (m/z=903.533415; rt=8.55735)	10.81	7.2023	8.82018	12.6521	7.71872	6.85607	10.0713	7.67901	6.54876	12.775	6.88943	7.06869	8.78067	9.91467	9.31789	44.9109	60.5959	61.3884
1843	L1631 (m/z=887.575428; rt=8.59518)	9.37554	10.0544	13.3135	8.25546	10.5911	5.96943	10.4674	7.14229	5.70613	7.36584	8.76739	7.75813	9.07491	12.9358	7.84211	55.4608	50.509	59.4107
1844	L1632 (m/z=887.545378; rt=8.59721)	9.90483	10.2687	15.5927	9.17967	13.6122	7.00013	11.5232	9.05259	7.91562	6.63931	10.9297	8.99169	12.0069	12.8088	8.1172	50.746	43.328	52.3827
1845	L1633 (m/z=366.279522; rt=8.60107)	19.233	16.5882	19.0209	20.087	15.3723	16.8425	16.7414	16.8493	14.6156	12.7059	18.9578	17.0004	14.3709	18.3421	10.8457	16.8619	13.8903	21.675
1846	L1636 (m/z=732.559326; rt=8.60172)	21.5826	22.5316	26.9003	23.3405	15.1414	13.9717	17.5573	15.0422	14.4685	7.51349	14.9358	13.8116	10.6576	18.5999	9.09712	19.3486	13.7491	21.7507
1847	L1634 (m/z=732.537958; rt=8.6011)	21.8366	23.0117	28.0019	23.1499	14.975	14.3763	17.7583	15.1591	14.3749	7.65189	14.7636	13.6985	10.4892	18.7505	8.82716	19.1142	13.3401	20.7212
1848	L1635 (m/z=733.561099; rt=8.60162)	21.1624	23.2805	28.1805	22.4108	16.206	13.5522	20.5969	15.1583	15.1337	8.42778	14.5733	14.3514	11.0477	18.9707	9.49084	16.3544	11.8111	19.2914
1849	L1658 (m/z=934.651585; rt=8.64277)	7.00678	8.86693	9.57807	7.56529	6.85143	4.94589	9.96231	8.06201	8.97017	6.22885	12.4582	10.8949	15.4559	19.6485	13.8664	53.7809	44.113	51.7446
1850	L1652 (m/z=935.655344; rt=8.64246)	7.06193	8.64549	9.23977	7.28031	7.11373	5.02632	10.1539	7.84222	9.37349	6.19108	12.5615	11.0987	15.4665	19.6455	13.8317	53.8463	44.1916	51.43
1851	L1657 (m/z=936.658946; rt=8.64271)	7.25452	9.44526	9.26276	7.34404	7.13841	5.36619	10.2503	7.74278	9.32584	6.28794	12.5097	11.0606	16.7705	19.2111	13.6307	52.0927	43.9527	51.3539
1852	L1650 (m/z=934.585655; rt=8.64118)	7.01637	8.03866	8.44068	8.02771	7.14	4.68222	10.1288	8.24804	8.7352	6.9122	12.1321	10.8854	14.9108	19.4546	13.8718	53.0041	44.9866	53.3847
1853	L1651 (m/z=936.623615; rt=8.64135)	7.14228	9.23414	9.12757	7.24098	7.78311	5.28874	10.8243	8.04672	9.76794	6.33671	12.7256	11.6544	17.1101	19.0354	14.0872	51.3456	43.1751	50.0742
1854	L1654 (m/z=467.324512; rt=8.64248)	7.25578	9.1281	10.0213	7.67617	7.07106	5.45829	10.5228	8.41997	9.51526	6.39057	13.7595	11.0388	16.3351	19.9255	14.7658	51.8196	41.696	49.2006
1855	L1660 (m/z=467.3301; rt=8.64386)	7.25578	9.1281	10.0213	7.67617	7.07106	5.45829	10.5228	8.41997	9.51526	6.39057	13.7595	11.0388	16.3351	19.9255	14.7658	51.8196	41.696	49.2006
1856	L1653 (m/z=467.827005; rt=8.64247)	7.21506	8.67134	9.56061	7.12658	7.59639	5.15185	10.2089	8.14033	9.97618	6.20298	13.0147	11.6988	16.0448	20.7753	14.8439	53.2016	41.802	48.7686
1857	L1655 (m/z=935.578986; rt=8.64251)	6.88399	8.41067	9.25619	7.10343	7.13478	4.94587	10.4547	7.90825	9.59153	6.65982	12.6275	11.5605	15.4466	20.4208	14.4571	53.4515	43.498	50.1888
1858	L1661 (m/z=467.835784; rt=8.64445)	7.17997	8.98525	10.2225	7.22746	7.40152	5.13798	10.1898	7.97486	9.67655	5.9846	12.8846	11.3646	15.4081	20.2931	14.443	54.01	42.4606	49.1554
1859	L1656 (m/z=937.66167; rt=8.64251)	5.99821	9.19247	10.1349	8.10057	6.20953	4.92106	9.61675	8.76859	9.01425	7.01567	13.1871	10.5039	14.9472	20.3363	13.8351	54.3216	42.3061	51.5908
1860	L1639 (m/z=937.661198; rt=8.62079)	5.90195	6.729	9.44423	5.49535	6.47273	3.90064	10.0968	6.67446	7.98229	5.71847	13.0145	9.95887	15.7828	19.7356	13.065	57.0047	47.3737	55.649
1861	L1659 (m/z=311.555899; rt=8.64356)	6.37573	8.99061	9.46111	6.4834	6.39358	4.7675	9.07785	7.83786	9.03545	6.91072	12.4036	11.0552	15.0355	20.2579	14.2092	56.1168	44.1165	51.4715
1862	L1648 (m/z=311.551099; rt=8.63872)	6.16354	8.50311	8.89433	6.73401	6.44789	4.91144	9.65394	7.64919	8.56733	7.56058	12.0989	11.6468	15.7971	21.0228	15.2338	54.0909	44.2781	50.7464
1863	L1637 (m/z=901.552226; rt=8.61471)	8.53784	10.2842	17.1676	7.06146	9.06474	5.24705	14.0517	11.4321	6.90063	9.59713	13.1557	7.60119	10.0382	15.2182	12.6966	50.7137	40.845	50.387
1864	L1641 (m/z=901.554022; rt=8.62948)	8.45441	10.2468	16.5251	6.99245	9.03177	5.05067	13.9144	11.3905	6.64236	9.50335	13.138	7.38905	9.9401	15.1629	12.2214	51.1953	41.03	52.1715
1865	L1640 (m/z=901.52216; rt=8.62753)	8.266	10.4038	17.0274	7.01981	9.98884	4.74734	16.865	11.5247	8.15776	9.48216	13.7036	8.78215	9.52624	15.0415	12.1473	48.8408	39.3375	49.138
1866	L1638 (m/z=552.499971; rt=8.61582)	11.0296	17.5504	17.0299	14.9006	12.4837	11.5251	14.2432	11.4187	12.2077	17.4021	13.294	13.906	13.3962	17.1981	13.8418	29.0283	28.0551	31.4895
1867	L1645 (m/z=939.608755; rt=8.63608)	10.1416	12.6187	13.6557	11.6011	11.2269	9.576	15.5078	12.9534	16.324	10.5323	17.2492	17.4592	20.2142	21.3734	21.2362	32.0029	24.5783	21.7488
1868	L1646 (m/z=940.611341; rt=8.63636)	9.6245	11.3189	12.6471	11.8961	11.5488	10.5168	15.4828	12.7201	14.5183	10.7149	17.0207	18.6573	20.6491	22.2145	21.6907	31.6325	25.1769	21.9698
1869	L1649 (m/z=939.567561; rt=8.64015)	10.779	13.5722	15.3815	12.6537	12.1697	10.7214	16.4511	14.2494	17.2557	12.1814	17.2493	19.437	20.0704	21.0882	23.2851	27.8644	21.6712	13.9193
1870	L1647 (m/z=940.573869; rt=8.63783)	9.89288	11.8993	13.2691	12.5007	12.2231	11.6209	16.8211	14.0034	15.7485	11.5233	18.7557	21.3941	22.2492	20.8438	23.7303	27.0128	22.2746	14.2371
1871	L1644 (m/z=941.606412; rt=8.63345)	11.2119	13.9733	14.7415	11.4654	10.1562	8.78076	14.1499	13.5446	14.872	10.3667	17.7228	18.24	18.6293	19.0089	20.2858	34.1768	25.5943	23.08
1872	L1642 (m/z=941.573692; rt=8.63025)	10.2928	14.9331	15.8975	11.8489	10.1478	9.25926	15.5503	13.2386	15.8809	10.7689	18.9902	19.1696	19.2543	20.5051	22.1536	32.2849	22.1852	17.6391
1873	L1643 (m/z=926.544395; rt=8.63322)	7.68977	8.63159	6.91588	11.1545	5.97223	8.26195	8.09117	7.29089	11.5138	10.3202	15.7839	15.2363	20.6466	25.0864	15.8177	42.0978	37.235	42.2543
1874	L1663 (m/z=925.53108; rt=8.68542)	9.64336	6.19157	6.38344	10.1181	4.63103	6.58379	7.53766	5.22418	9.55932	6.66548	14.0068	11.3784	27.7571	43.1291	11.2931	38.2783	26.8173	54.8019
1875	L1662 (m/z=926.509583; rt=8.65451)	8.32942	9.1919	5.94627	9.67878	4.80799	7.71552	8.55414	7.35025	12.9275	11.5206	16.0177	12.8191	21.3882	29.6105	13.1206	40.5289	33.0216	47.4709
1876	L1670 (m/z=925.493128; rt=8.70484)	9.15024	6.60981	6.24388	10.2168	5.02799	6.42194	9.01971	4.99944	6.5953	7.32615	10.8287	7.2175	17.3459	51.4724	7.97847	46.9412	21.0616	65.5429
1877	L1664 (m/z=388.344284; rt=8.68742)	16.0679	14.3026	14.1519	15.5667	22.9304	21.6574	22.6136	19.3497	16.5567	16.1794	14.2082	21.4525	19.7644	19.7541	16.8152	9.80805	9.45486	9.36615
1878	L1665 (m/z=391.286526; rt=8.6978)	24.9641	20.5611	14.659	21.6086	22.8759	24.8524	16.9195	20.6803	19.1792	11.7837	15.6076	18.7335	16.4464	15.2401	16.4355	8.27771	5.03499	6.14049
1879	L1669 (m/z=780.559092; rt=8.70482)	26.0075	23.7611	20.2148	29.1192	25.7863	25.6282	22.7023	24.0944	22.4022	8.11902	19.5935	19.0048	10.9655	4.64723	11.3221	3.08637	2.11758	1.42804
1880	L1671 (m/z=780.535129; rt=8.70509)	25.6139	22.9861	20.1254	28.6528	24.4085	25.5416	22.6147	23.169	22.4901	8.47121	19.1305	18.9159	11.3371	8.05334	11.4126	3.31022	2.25254	1.51446
1881	L1667 (m/z=781.562978; rt=8.70439)	26.1747	23.1148	19.8382	27.8994	25.6836	25.0984	23.3027	24.2293	22.2976	8.45576	20.1653	19.0257	10.484	4.54402	11.6697	3.68346	2.26303	2.07039
1882	L1668 (m/z=781.539966; rt=8.70457)	25.4409	22.2471	19.5237	27.5537	24.573	25.1575	24.0126	23.1242	22.2594	8.75517	19.6511	18.8695	10.6614	8.17234	12.1699	3.57612	2.23224	2.02
1883	L1666 (m/z=796.554206; rt=8.69979)	26.5921	27.5775	30.5671	27.3981	28.4474	26.0166	20.6221	21.7784	19.3595	14.5125	15.4696	15.4325	8.17994	5.15031	6.81266	2.69535	1.57677	1.81157
1884	L1690 (m/z=758.572754; rt=8.70703)	22.1736	26.7516	31.1626	21.4689	19.2933	18.7141	18.0096	17.9629	18.4155	16.2071	17.3857	15.579	10.7972	10.9749	10.3733	11.3436	7.63164	5.75546
1885	L1685 (m/z=759.576558; rt=8.70689)	22.1843	26.9224	31.107	21.4766	19.293	18.741	17.938	18.0731	18.4741	16.0682	17.2406	15.5174	11.0176	10.8592	10.4593	11.3152	7.61174	5.70119
1886	L1695 (m/z=379.287508; rt=8.70714)	22.3913	27.173	31.4253	21.5185	19.3042	18.592	18.0621	18.2805	18.5563	16.261	17.3542	15.6198	11.0603	10.6453	10.3374	10.7068	7.24271	5.46907
1887	L1691 (m/z=759.536817; rt=8.70704)	24.2498	26.8648	31.1383	23.6316	18.9861	18.3558	20.1322	18.19	18.6395	6.97062	17.2006	15.537	12.473	11.1785	10.4903	12.5427	7.58008	5.83902
1888	L1684 (m/z=760.582838; rt=8.70685)	22.0874	26.8838	31.2961	21.4432	19.2813	18.6032	17.7706	18.3108	18.4404	16.108	17.2305	15.6795	11.1846	10.9418	10.3824	11.4061	7.35185	5.59832
1889	L1686 (m/z=379.789476; rt=8.7069)	22.5557	27.1988	31.4856	21.6679	19.4352	18.6039	17.815	18.3422	18.602	16.2866	17.5021	15.5351	11.0813	10.3169	10.4375	10.5935	7.20473	5.33591
1890	L1694 (m/z=252.861237; rt=8.70709)	24.5067	27.0468	31.3553	23.7196	19.0966	18.3874	20.1467	18.1232	18.5489	7.03539	17.342	15.6995	12.28	10.9583	10.3281	12.3116	7.43316	5.68076
1891	L1693 (m/z=760.545029; rt=8.70707)	23.8082	26.7241	31.2325	23.1104	18.8449	18.2026	19.9714	18.2094	18.3976	7.15609	17.2128	15.8281	12.9712	11.426	10.468	12.9827	7.58284	5.87125
1892	L1677 (m/z=761.58482; rt=8.70664)	24.506	27.1913	32.1834	23.1493	19.2645	17.8054	20.3056	18.0527	18.6036	7.15258	17.7	15.4912	12.5804	10.4	10.4753	12.3061	7.39153	5.44106
1893	L1688 (m/z=253.196352; rt=8.70695)	24.2479	26.9417	31.0857	23.4474	19.2194	18.4102	20.1648	18.2238	18.5641	6.84248	17.3056	15.5729	12.8445	10.8761	10.6211	12.4529	7.43338	5.74589
1894	L1682 (m/z=380.293379; rt=8.70679)	23.3012	27.0756	31.296	21.9763	19.3873	18.9261	18.1831	18.3536	18.337	16.2056	17.7272	15.6295	11.4172	10.5706	10.651	8.91658	6.88568	5.16033
1895	L1692 (m/z=380.287553; rt=8.70704)	23.317	27.1395	31.296	21.9912	19.4331	18.9261	18.1954	18.397	18.337	16.1488	17.6042	15.6295	11.425	10.5243	10.651	8.92263	6.90193	5.16033
1896	L1687 (m/z=761.556019; rt=8.70695)	24.1064	26.7258	31.9094	23.0614	18.5909	17.352	21.1636	18.7007	18.5226	8.01693	17.4182	15.5622	13.0065	10.987	11.0173	10.6452	7.57735	5.63644
1897	L1702 (m/z=379.272252; rt=8.70804)	23.0947	26.1539	30.263	21.981	18.73	18.3929	20.8838	18.8472	19.04	7.48591	16.4641	15.7713	14.6353	12.1149	10.8743	11.9194	7.68982	5.65849
1898	L1701 (m/z=252.854767; rt=8.70788)	22.3651	25.5766	29.5281	22.0933	18.2399	18.4591	20.7334	18.435	18.9732	7.91174	17.3386	16.4912	13.9056	12.5971	10.4939	12.9908	7.81284	6.05462
1899	L1675 (m/z=253.200643; rt=8.70638)	22.7058	26.6961	31.028	21.4723	19.3294	18.6651	17.211	17.7786	18.2468	15.8975	17.4408	15.3308	11.4087	10.5209	10.2001	11.3047	8.23414	6.52916
1900	L1689 (m/z=379.774712; rt=8.70702)	22.5205	27.2203	31.118	21.8979	19.6868	18.9417	18.0753	18.5041	18.809	16.6036	17.5845	15.6355	10.9014	10.3186	9.9378	10.0013	6.68573	5.55788
1901	L1699 (m/z=189.643296; rt=8.70758)	23.3568	26.9314	29.3194	23.1094	18.5923	18.6261	20.5916	18.4915	18.9481	6.89142	17.4632	16.1419	13.6649	10.9921	10.4914	12.3858	7.5296	6.47297
1902	L1676 (m/z=760.633521; rt=8.70643)	24.2746	26.9875	32.6501	21.8138	20.6666	19.5921	16.0542	18.6975	17.9672	17.2273	18.0627	15.1792	11.2628	9.45373	9.59694	9.36716	6.132	5.01453
1903	L1697 (m/z=253.189613; rt=8.70724)	23.0202	26.4379	30.5679	22.7462	18.7066	18.7477	20.5584	18.1367	18.4882	8.33768	16.8816	15.5409	13.4332	11.9752	10.2258	11.9043	7.86197	6.42945
1904	L1681 (m/z=253.530561; rt=8.70678)	22.2439	26.8859	31.1335	21.2009	19.2909	18.2075	18.4784	18.2195	18.5429	16.3089	16.9679	15.3393	11.513	11.4568	10.508	10.2548	7.17901	6.26877
1905	L1678 (m/z=189.646397; rt=8.70672)	22.2702	26.2409	32.0688	21.0157	18.6792	18.2802	18.2146	18.0466	17.6529	16.2894	17.122	15.3984	9.81937	11.9261	9.97307	12.3907	7.9852	6.62674
1906	L1673 (m/z=762.58699; rt=8.7062)	20.9011	26.4812	31.3938	21.898	19.8638	17.4236	18.6076	16.4103	18.0221	12.2635	17.8131	15.3945	11.8108	10.6844	10.2949	14.5189	8.74704	7.47118
1907	L1698 (m/z=151.715705; rt=8.70729)	23.0488	27.1368	32.0922	22.0711	18.6213	18.0758	20.1875	18.3287	18.2098	12.3122	17.1904	15.3831	11.4251	11.4322	9.61278	10.9553	7.29062	6.62625
1908	L1680 (m/z=151.716539; rt=8.70678)	22.9888	27.0521	31.9723	22.0136	18.5632	18.0543	20.1349	18.2715	18.1418	12.3714	17.4487	15.3353	11.3953	11.3966	9.81414	11.096	7.26787	6.68212
1909	L1679 (m/z=380.791609; rt=8.70676)	22.8783	27.506	31.9098	21.8368	19.5254	18.0577	18.842	18.1957	19.0464	13.0976	17.7639	15.4501	11.7493	9.95162	9.92931	11.596	7.05745	5.60663
1910	L1672 (m/z=380.796789; rt=8.70611)	23.2817	27.2641	32.3197	21.9974	19.8162	18.0113	18.8464	18.0744	19.0778	13.0103	17.9457	15.3523	11.365	9.63656	9.74858	11.4992	7.26302	5.4904
1911	L1696 (m/z=253.526672; rt=8.70714)	21.924	27.2239	30.3612	20.7802	18.932	18.5923	19.6241	17.3497	18.5128	12.728	17.0288	15.2911	12.6306	12.1438	10.1767	12.313	7.32179	7.06591
1912	L1683 (m/z=189.894143; rt=8.70683)	24.4055	26.9916	31.2149	22.2543	19.3526	18.6407	18.4217	18.6584	18.4402	13.7193	18.0769	15.5374	11.8467	10.3635	10.5005	9.35259	6.55701	5.66623
1913	L1674 (m/z=189.897278; rt=8.70635)	21.8823	25.0182	28.8448	19.5681	17.4852	18.7486	18.7408	18.0788	17.193	12.0275	16.014	15.7753	11.2056	13.642	11.0889	16.5756	9.76177	8.34935
1914	L1713 (m/z=923.523967; rt=8.71078)	5.78416	3.00331	3.74785	4.58503	2.73838	1.93041	6.98604	3.54904	3.77348	7.60215	4.03397	5.44694	12.0017	50.5268	11.4686	63.0409	36.1485	73.6327
1915	L1719 (m/z=923.485054; rt=8.71613)	5.05803	3.31089	3.09034	5.47034	3.1084	2.83163	7.43054	3.81217	4.52499	8.37331	4.58317	5.53785	13.9793	50.9917	11.068	59.6885	34.1937	72.9472
1916	L1712 (m/z=924.525468; rt=8.71036)	4.14513	2.1473	2.82946	6.61998	3.83556	3.74045	6.75995	3.59997	3.79321	8.00223	4.83209	5.89607	11.8395	50.0906	10.412	62.6333	35.4945	73.3288
1917	L1718 (m/z=924.478593; rt=8.71531)	4.75908	3.05601	3.8969	5.19173	4.04129	2.83912	8.66914	4.76534	5.75569	9.00384	6.06079	6.89337	16.2298	49.0558	10.6243	56.1465	33.0207	69.9906
1918	L1700 (m/z=905.512129; rt=8.70763)	5.3429	4.18098	3.7258	5.07393	3.82061	3.01764	7.93255	4.33602	5.35896	7.90007	6.27377	7.21554	14.5443	43.2524	12.3185	59.2063	38.1362	68.3635
1919	L1707 (m/z=770.583683; rt=8.70883)	5.82249	7.4144	7.75578	6.34336	6.04471	4.83936	9.23913	7.31141	9.75113	5.35708	12.0465	11.7715	14.841	17.4854	15.7459	58.3969	49.6977	50.1363
1920	L1710 (m/z=770.555341; rt=8.70951)	5.58343	6.92059	7.2202	6.0134	5.83038	4.36584	8.92945	7.16804	9.37567	5.9969	11.6413	11.2301	15.1358	17.6194	15.1493	58.341	50.8203	52.6589
1921	L1706 (m/z=771.586395; rt=8.70873)	6.00132	7.36771	7.97166	6.56873	6.38265	4.77607	9.36572	7.48691	9.65623	5.69817	12.7707	11.5502	15.042	17.4959	16.1994	57.324	48.4961	49.8463
1922	L1709 (m/z=771.563063; rt=8.70932)	5.74742	7.18543	7.59029	6.40281	6.19049	4.64418	9.37152	7.38143	9.55995	5.87192	12.4859	11.4355	15.3384	17.6223	16.0206	57.2679	49.1344	50.7495
1923	L1711 (m/z=771.549723; rt=8.70982)	5.31783	7.32698	7.3282	5.99302	6.00091	4.39203	9.63749	7.6316	9.72534	5.96085	12.579	11.3919	16.1232	17.3647	15.5937	56.9676	49.0969	51.5688
1924	L1703 (m/z=772.589842; rt=8.70818)	5.65012	7.68712	9.64557	5.37154	5.80808	5.01466	9.41734	7.65428	10.0391	11.3743	12.8919	12.5829	15.4137	18.5276	14.6571	52.7731	47.431	48.0607
1925	L1704 (m/z=772.572635; rt=8.70843)	5.56451	7.4628	9.66302	5.20098	5.68717	5.01582	9.59322	7.50481	9.92665	11.1157	12.6576	12.3319	15.7563	19.0609	14.4249	52.7693	47.6267	48.6376
1926	L1705 (m/z=385.294627; rt=8.70872)	5.92559	7.44041	8.14502	6.43713	6.07123	4.77907	9.72914	7.44682	10.0745	5.49959	12.9885	12.2872	16.1294	18.3622	17.0176	56.2792	47.6909	47.6966
1927	L1708 (m/z=385.289243; rt=8.7093)	5.92559	7.44041	8.15337	6.43713	6.07123	4.68148	9.72914	7.44682	10.0848	5.49959	12.9885	12.2998	16.1294	18.3622	17.0351	56.2792	47.6909	47.7455
1928	L1730 (m/z=895.529644; rt=8.74288)	5.96226	8.08129	5.02052	7.96947	4.65999	4.49883	9.11175	7.57547	11.9097	10.6045	18.1105	16.4641	18.7406	11.3068	21.1905	47.6113	50.2659	40.9164
1929	L1729 (m/z=896.531541; rt=8.7428)	6.0084	7.81562	4.99311	7.46609	4.65291	4.96184	9.02425	7.50404	11.7989	10.5457	17.3384	16.635	17.8984	11.2242	20.9443	49.0571	51.4648	40.6669
1930	L1734 (m/z=895.495819; rt=8.7439)	5.90337	7.94063	4.95324	7.96781	4.59267	4.52727	9.318	7.43587	11.765	10.4289	17.8377	16.4709	19.1291	11.6603	21.3691	47.2528	50.5328	40.9145
1931	L1728 (m/z=897.533331; rt=8.74272)	5.69876	8.0306	5.16305	7.49216	4.44006	4.35192	8.98431	7.56722	12.111	10.4343	17.9391	16.5133	18.642	11.5626	20.7417	48.7485	50.4604	41.1191
1932	L1736 (m/z=896.489246; rt=8.744)	6.15586	7.52016	4.89665	7.86955	4.62832	4.78682	9.27394	7.18054	11.5714	7.23836	17.8239	16.6294	19.3748	11.2749	21.6901	50.0875	51.5722	40.4256
1933	L1732 (m/z=897.501775; rt=8.7436)	5.56973	7.86069	4.98386	7.56094	4.44415	4.21445	8.96913	7.56906	11.9087	10.3415	17.9402	16.4632	18.839	11.4094	21.1832	48.7197	50.7765	41.2466
1934	L1715 (m/z=775.529536; rt=8.71203)	6.42468	9.49321	8.2438	8.65922	9.62321	8.8032	12.4065	11.6424	12.0637	10.6266	14.1348	13.2607	22.9197	16.0703	25.457	38.9634	39.0361	32.1716
1935	L1714 (m/z=775.547152; rt=8.71132)	6.42468	9.48539	8.2438	8.65922	9.61528	8.8032	12.4065	11.6328	12.0637	10.6266	14.2056	13.2607	22.9197	16.057	25.457	38.9634	39.0039	32.1716
1936	L1731 (m/z=898.533268; rt=8.74315)	5.33539	7.62555	5.58292	8.15946	4.53362	4.53839	8.23791	7.93936	12.0658	10.9104	18.6276	16.2651	18.5175	10.8437	20.6215	48.8393	50.4302	40.9263
1937	L1720 (m/z=909.547727; rt=8.72448)	5.54724	5.43189	2.27083	6.77278	3.83771	5.25759	7.24073	6.07713	9.20863	9.11518	15.1139	12.5813	19.1066	15.8521	19.4874	52.2175	53.6873	51.1943
1938	L1727 (m/z=447.769963; rt=8.74258)	5.63165	7.9363	4.96977	7.80179	4.30523	4.42016	9.05162	7.40879	11.963	10.7258	18.3458	16.6209	18.7473	11.398	21.4423	48.0419	50.6059	40.5839
1939	L1735 (m/z=447.762473; rt=8.74397)	5.62564	7.9363	4.96977	7.79346	4.30523	4.42016	9.04196	7.40879	11.963	10.7347	18.3458	16.6209	18.8136	11.398	21.4423	47.9906	50.6059	40.5839
1940	L1721 (m/z=910.550989; rt=8.72509)	5.17021	5.63108	3.04107	5.90837	3.53832	4.4674	7.19184	6.66638	8.33047	9.31778	14.7843	13.0935	17.3126	14.7458	18.3386	55.0992	54.6341	52.729
1941	L1722 (m/z=910.549806; rt=8.7251)	5.17021	5.63108	3.04107	5.90837	3.53832	4.4674	7.19184	6.66638	8.33047	9.31778	14.7843	13.0935	17.3126	14.7458	18.3386	55.0992	54.6341	52.729
1942	L1726 (m/z=448.270796; rt=8.74256)	4.83895	7.14619	4.42661	7.26225	4.31373	4.57388	8.83586	7.22812	11.163	10.3878	17.6662	16.2553	18.4766	11.1087	21.5383	50.1985	52.537	42.043
1943	L1733 (m/z=448.26375; rt=8.74374)	4.9236	7.14619	4.42661	7.25579	4.31373	4.57388	8.828	7.22812	11.163	10.3786	17.6662	16.2553	18.4602	11.1087	21.5383	50.1538	52.537	42.043
1944	L1737 (m/z=898.500387; rt=8.74419)	5.46971	7.32073	4.98904	8.55982	4.56589	4.30676	8.47721	7.72892	11.9073	7.189	17.342	16.2235	19.3044	10.7096	21.1052	50.9998	52.3329	41.4682
1945	L1724 (m/z=911.551682; rt=8.72635)	6.66997	6.19718	7.43991	6.47521	5.29795	8.8505	8.06792	6.60867	14.8921	9.52151	15.5322	20.436	11.4185	7.93514	24.4153	57.8469	58.4289	23.9663
1946	L1725 (m/z=911.550475; rt=8.72636)	6.66997	6.19718	7.43991	6.47521	5.29795	8.8505	8.06792	6.60867	14.8921	9.52151	15.5322	20.436	11.4185	7.93514	24.4153	57.8469	58.4289	23.9663
1947	L1723 (m/z=909.482986; rt=8.72532)	7.43482	7.39741	6.47496	10.3669	7.632	8.32518	8.68957	8.00763	7.9576	10.3394	14.6772	11.7749	12.3051	5.62397	17.396	50.8642	56.6618	48.0714
1948	L1717 (m/z=796.533432; rt=8.71487)	21.3377	22.5865	20.7427	22.1064	21.979	17.4798	16.7393	16.9694	13.8413	12.313	13.2025	10.857	6.67216	5.83205	5.22735	20.8315	19.4307	31.8519
1949	L1716 (m/z=797.53683; rt=8.7134)	25.7667	22.9643	20.2206	22.2996	20.8404	17.8828	17.3641	18.0757	15.9572	7.81847	13.5961	11.0129	5.79376	6.20965	4.92763	20.9575	18.3139	29.9989
1950	L1738 (m/z=437.735177; rt=8.78422)	14.5754	16.2829	20.6414	9.41914	20.8275	15.162	16.1714	22.0632	20.4897	15.3749	11.0453	15.1692	21.4155	16.2419	16.9428	23.0436	13.5392	11.5949
1951	L1741 (m/z=796.598695; rt=8.84689)	5.64869	7.52654	6.2124	5.71202	5.11552	2.95477	8.85886	6.28873	5.98883	5.7472	10.7197	7.32652	12.852	16.0631	8.78313	61.1812	54.2865	68.7344
1952	L1740 (m/z=891.568987; rt=8.81159)	4.83185	5.81308	2.35386	6.28602	4.9156	1.57774	7.45566	6.16751	2.04802	5.20807	7.25557	2.2881	14.8368	13.7918	4.04642	61.3816	62.0565	87.6859
1953	L1739 (m/z=891.532698; rt=8.81155)	4.05981	5.60174	2.41046	5.94749	4.62202	1.5512	7.1326	5.31031	2.20837	4.71516	7.60652	3.01058	17.0611	14.0776	4.89426	61.0839	62.7818	85.9251
1954	L1742 (m/z=797.602325; rt=8.84813)	7.17135	8.33395	6.07749	6.6951	5.86728	3.22877	8.29496	8.0384	8.07532	5.38418	10.4181	7.30346	15.8951	14.9499	8.12761	56.5593	52.3924	67.1874
1955	L1750 (m/z=784.589414; rt=8.87984)	25.4839	27.0421	36.9877	22.2693	18.8383	18.1801	19.8348	16.7422	18.5326	9.15927	13.7877	13.3567	13.53	18.9264	8.56487	9.72267	4.66331	4.37802
1956	L1746 (m/z=784.556693; rt=8.87911)	25.5375	27.2806	37.5154	22.4601	19.1377	18.2507	19.7631	16.6468	18.3745	9.20469	13.528	13.1804	13.5252	18.9092	8.4007	9.50948	4.49774	4.27831
1957	L1749 (m/z=785.59314; rt=8.87981)	26.0355	26.6938	37.1789	22.6193	19.0389	18.6374	19.4997	17.619	18.2931	9.42391	13.1151	13.1385	13.1049	19.1127	8.62567	9.31667	4.42044	4.12635
1958	L1786 (m/z=716.526954; rt=8.91709)	35.0407	36.873	43.5754	34.6466	23.0845	31.015	17.4868	17.4602	14.9559	5.95832	10.6705	7.76097	5.67551	11.2305	2.04065	1.19214	0.681155	0.652113
1959	L1747 (m/z=785.570953; rt=8.87923)	26.0701	26.7187	37.2383	22.7125	19.137	18.7291	19.4047	17.6517	18.2516	9.59912	13.0952	13.077	13.0264	18.9684	8.58248	9.18721	4.42906	4.12154
1960	L1787 (m/z=716.50476; rt=8.91733)	34.8937	36.6351	43.4613	34.2622	23.107	31.1493	17.3155	17.3634	14.9372	5.89441	10.601	7.74199	6.19317	11.3214	2.03965	1.44099	0.972088	0.670493
1961	L1748 (m/z=786.598216; rt=8.87933)	25.1706	26.1049	37.2925	21.4961	18.3553	19.0981	20.4296	16.3289	17.1957	9.71444	13.9392	13.53	13.4551	20.7086	8.33832	9.73415	4.563	4.54529
1962	L1744 (m/z=786.574017; rt=8.87884)	25.0236	26.2029	37.2672	21.0741	18.5051	19.3702	19.9355	16.286	17.0738	11.317	13.8671	13.4708	13.4551	20.6259	8.33319	9.1947	4.51291	4.48481
1963	L1752 (m/z=392.292908; rt=8.88001)	25.3713	26.946	36.2944	22.338	18.9019	18.4022	20.0877	16.9357	18.5974	9.64097	13.7921	13.4433	13.0116	19.0484	9.16482	9.55038	4.37592	4.09791
1964	L1755 (m/z=392.298973; rt=8.8805)	25.3713	26.946	36.2944	22.338	18.9019	18.4022	20.0877	16.9357	18.5974	9.64097	13.7921	13.4433	13.0116	19.0484	9.16482	9.55038	4.37592	4.09791
1965	L1751 (m/z=392.800056; rt=8.87991)	23.9361	27.1572	37.6702	21.9781	18.8867	18.4807	19.848	17.0396	18.0263	10.5113	12.7552	13.2146	15.2597	19.4783	8.26596	8.46682	4.68299	4.34227
1966	L1745 (m/z=392.795674; rt=8.87911)	23.7054	27.1572	37.6071	21.7662	18.8867	18.4498	19.6566	17.0396	17.9961	10.41	12.7552	13.1925	15.1126	19.4783	8.25213	9.34916	4.68299	4.5024
1967	L1753 (m/z=261.5334; rt=8.8801)	22.6855	26.8663	35.9229	21.1313	18.624	18.0607	21.9188	16.0724	17.8334	8.91159	13.6914	13.512	13.6562	19.0473	8.78855	11.6966	5.69872	5.88252
1968	L1754 (m/z=787.598693; rt=8.88016)	25.2955	24.9327	33.193	23.8093	17.5143	17.3916	17.9635	17.3264	20.7096	13.136	16.5032	14.0348	11.5721	17.5291	10.1557	8.22363	6.19443	4.51518
1969	L1743 (m/z=261.529498; rt=8.87753)	23.6814	24.3347	32.241	22.4114	20.2827	20.7204	20.0604	15.9435	17.4927	12.5019	14.2135	15.0211	11.7715	19.7256	8.90053	9.57345	5.49997	5.62431
1970	L1756 (m/z=903.536891; rt=8.90188)	13.6082	18.3646	15.6476	13.7461	17.4897	16.4715	14.3677	21.3886	9.44303	19.313	13.4278	14.2228	19.6061	11.5621	14.4125	19.3589	17.7672	29.8026
1971	L1757 (m/z=903.569061; rt=8.9024)	13.6566	15.8801	11.9203	16.5538	15.1236	15.886	11.694	18.495	8.81469	21.7829	15.0688	15.4838	16.6896	13.5869	10.9884	19.6231	21.8455	36.9068
1972	L1759 (m/z=887.573742; rt=8.91291)	14.3095	13.7789	23.5307	11.0284	17.5316	10.1545	20.6705	15.7888	11.3897	14.186	9.34651	11.9327	10.5368	19.255	14.4948	29.2688	24.2991	28.4977
1973	L1758 (m/z=887.544901; rt=8.91255)	13.7356	12.2128	23.619	10.7323	18.2805	10.2337	23.1468	14.7141	11.5782	13.7581	8.05404	12.3067	11.5431	25.4591	14.6659	27.0841	21.2794	27.5965
1974	L1760 (m/z=888.577083; rt=8.91329)	13.9408	11.4966	22.5986	10.9568	19.0682	11.3022	20.0808	14.3294	13.2758	12.338	8.9144	11.3295	13.3442	24.6966	14.2293	29.3395	21.4948	27.2646
1975	L1788 (m/z=888.54002; rt=8.91741)	14.8718	10.5319	24.1006	10.2116	16.8234	10.8036	21.3346	12.911	11.8948	12.0285	16.5375	12.7734	14.0719	25.3923	16.6272	27.4816	17.8039	23.8003
1976	L1777 (m/z=907.526048; rt=8.91505)	13.0866	16.2765	15.5245	15.3975	13.4672	12.4877	16.5199	16.193	16.2615	14.392	16.9456	16.4049	18.3023	14.8321	16.3442	22.3017	22.2856	22.9772
1977	L1768 (m/z=908.52917; rt=8.9148)	13.2163	16.6784	15.4346	15.5503	13.4201	12.4997	16.5999	16.1666	16.6836	14.4137	16.9359	16.5373	18.403	15.0415	16.3602	21.8168	21.7576	22.4846
1978	L1783 (m/z=909.528911; rt=8.91609)	13.3418	16.7422	15.7296	15.668	13.9795	12.415	17.0276	16.1247	16.4738	14.1956	17.1695	16.402	18.1316	15.0565	15.8866	21.6355	20.9277	23.093
1979	L1779 (m/z=909.503706; rt=8.91523)	13.2379	16.6216	15.4188	15.5404	13.7389	12.3167	17.0376	15.9607	16.6212	14.1396	17.1533	16.7724	18.1252	14.9444	16.288	21.9192	21.5811	22.5829
1980	L1780 (m/z=907.464676; rt=8.91527)	12.5447	15.9722	14.9653	15.0384	12.9445	11.9859	16.2962	16.0342	16.2945	14.168	17.2884	16.4655	18.3773	14.257	16.4798	23.5754	23.5038	23.8089
1981	L1778 (m/z=453.761839; rt=8.91517)	13.6065	16.3218	15.4491	15.4682	13.9046	12.8884	16.5435	16.3939	16.3426	14.8005	16.923	16.4961	18.3026	14.931	16.5698	21.2788	21.5257	22.2539
1982	L1773 (m/z=453.770355; rt=8.91495)	13.5581	16.3818	15.6338	15.5052	14.1706	12.8582	16.5421	16.3052	16.2594	14.8379	16.7869	16.4349	18.2498	14.9334	16.4964	21.3069	21.422	22.3173
1983	L1771 (m/z=908.461527; rt=8.91494)	12.8144	16.2816	14.9228	15.2671	13.0723	12.3196	16.2059	15.8902	16.5423	14.1091	16.9627	16.5243	18.4941	14.6895	16.1596	23.1095	23.1036	23.5314
1984	L1764 (m/z=454.265875; rt=8.91431)	13.835	16.983	15.4949	15.9003	14.0718	13.1243	16.5805	16.4993	16.6489	14.92	16.9328	16.6036	18.1191	14.9247	16.4246	20.645	20.5885	21.7038
1985	L1769 (m/z=454.270404; rt=8.91482)	13.835	16.983	15.4949	15.9003	14.0718	13.1243	16.5805	16.4993	16.6489	14.92	16.9328	16.6036	18.1191	14.9247	16.4246	20.645	20.5885	21.7038
1986	L1775 (m/z=454.262416; rt=8.91496)	13.835	16.983	15.4949	15.9003	14.0718	13.1243	16.5805	16.4993	16.6489	14.92	16.9328	16.6036	18.1191	14.9247	16.4246	20.645	20.5885	21.7038
1987	L1774 (m/z=302.513781; rt=8.91496)	12.8427	16.4831	15.5892	15.2377	13.4024	12.3513	16.6549	16.1955	16.6613	14.2061	16.9316	16.3575	18.9606	15.0257	16.426	22.0981	21.9616	22.6147
1988	L1782 (m/z=454.763947; rt=8.91593)	13.1106	16.8309	16.0335	15.6034	13.6246	12.2423	17.0831	15.8769	16.076	14.3422	17.0405	16.1518	17.9532	14.6519	15.4105	21.9075	21.9752	24.0859
1989	L1767 (m/z=302.848415; rt=8.91475)	13.2487	16.6416	15.1759	15.5568	13.3301	12.361	16.762	15.8972	17.1179	14.4052	18.1061	17.248	19.0713	15.1948	16.8568	20.9561	20.8302	21.2404
1990	L1791 (m/z=454.773921; rt=8.91767)	13.3245	17.0933	16.5439	15.9679	14.0127	12.3761	17.305	16.1177	15.5837	14.5106	16.6277	15.6155	17.6377	15.1845	14.9573	21.2542	20.9642	24.9235
1991	L1781 (m/z=302.50903; rt=8.91532)	12.6808	15.8032	14.8677	15.0637	13.2379	12.3299	16.5446	16.4457	16.8199	14.5248	18.0284	16.866	19.3323	14.6794	17.1834	21.8538	21.8054	21.9332
1992	L1776 (m/z=302.844169; rt=8.91505)	13.3085	16.3663	14.8518	15.5092	13.3654	12.4385	16.7629	16.0172	17.125	14.5697	18.2754	17.5132	19.0385	15.1487	17.0456	20.8112	20.8271	21.0259
1993	L1765 (m/z=303.180378; rt=8.91452)	10.8599	15.6178	14.9487	13.6238	11.1988	9.96492	15.6346	15.3933	15.8566	12.3535	17.6193	16.8119	19.5326	14.1189	16.7001	27.9956	26.0519	25.7178
1994	L1785 (m/z=455.265168; rt=8.91706)	13.2127	17.3402	15.6626	15.6015	13.1568	11.9784	17.3436	16.5452	16.1481	14.5582	17.4924	16.7312	18.8131	15.5786	16.5483	20.4708	19.887	22.9313
1995	L1770 (m/z=303.183901; rt=8.91483)	10.9345	16.058	15.1641	13.8505	11.1511	9.72508	15.4822	15.1474	15.3546	12.3082	17.2225	16.3342	19.402	14.3144	16.0032	28.0226	26.1066	27.4188
1996	L1802 (m/z=906.52167; rt=8.91967)	3.60476	3.73301	2.83713	4.9108	3.78571	2.65009	7.27868	5.71132	6.31666	6.29293	10.3713	8.30907	16.5875	11.1429	12.5533	61.3254	65.2557	67.3338
[truncated: 1,935 more rows]

## Sheet: comparison
			Peak Information					Annotation			bestfit: subcellular distribution																	nnls: subcellular distribution
											based on individual gradients								based on random assembled gradients									based on individual gradients								based on random assembled gradients
											distribution [%] (mean ± sd)			error estimates		quality (back-fit)			distribution [%] (mean ± sd)			error estimates		quality (back-fit)				distribution [%] (mean ± sd)			error estimates		quality (back-fit)			distribution [%] (mean ± sd)			error estimates		quality (back-fit)
#	AnalyteID		m/z	Retention	T/S cluster	broad compound group		Species	Type		chloroplast [%]	cytosol [%]	vacuole [%]	Q-value	residual sum of squares (RSS)	coefficient of determination (R^2)	P-value R^2	Manhattan distance	chloroplast [%]	cytosol [%]	vacuole [%]	Q-value	residual sum of squares (RSS)	coefficient of determination (R^2)	P-value R^2	Manhattan distance		chloroplast [%]	cytosol [%]	vacuole [%]	Q-value	residual sum of squares (RSS)	coefficient of determination (R^2)	P-value R^2	Manhattan distance	chloroplast [%]	cytosol [%]	vacuole [%]	Q-value	residual sum of squares (RSS)	coefficient of determination (R^2)	P-value R^2	Manhattan distance
1	Marker#1: GAPDH (cpl.)								marker
2	Marker#1.1: starch (cpl.)								marker
3	Marker#1.2: DGDG (cpl.)								marker
4	Marker#2: UGPase (cyt.)								marker
5	Marker#2.1: GlcCer (cyt.)								marker
6	Marker#2.2: TAG (cyt.)								marker
7	Marker#3: nitrate (vac.)								marker
8	Marker#3.1: glucosinolates (vac.)								marker
9	Marker#3.2: flavonoids (vac.)								marker
10	(Lactate)-189.5		117	189.53:1.75		primary cpd.		Lactate	known		6±10	86±21	8±11	0.8	25.4	0.66	0.2	4.4	4±5	90±9	6±6	1	26.2	0.62	0.12	4.7		6±10	85±20	8±11	0.8	24.8	0.66	0.2	4.3	4±5	89±8	6±6	0.9	25.8	0.62	0.11	4.6
11	(2-Hydroxypyridine)-204.9		152	204.9:1.75		primary cpd.		2-Hydroxypyridine	known		1±2	88±10	11±12	1.1	38.7	0.72	0.06	5.6	1±2	89±9	10±8	1.2	39.9	0.71	0.05	5.9		1±3	88±7	11±11	1.1	38.3	0.73	0.05	5.6	1±2	89±9	10±8	1.2	39.7	0.71	0.05	5.8
12	(Alanine)-209.0		116	209:1.75		primary cpd.		Alanine	known		7±12	85±23	8±11	1.1	33.4	0.64	0.17	5.8	6±7	88±11	6±7	1.1	32.4	0.65	0.09	5.4		7±12	85±22	8±11	1.1	32.8	0.64	0.17	5.7	6±7	88±10	6±7	1.1	32.3	0.65	0.09	5.3
13	(Pyruvate)-222.7		174	222.67:1.75		primary cpd.		Pyruvate	known		19±7	47±12	34±5	0.7	12.3	0.95	0	3.2	19±4	46±9	34±6	0.6	11.1	0.95	0	3.1		19±7	47±11	34±5	0.7	12.2	0.95	0	3.2	19±4	46±9	34±6	0.6	11	0.95	0	3.1
14	(2-Hydroxybutyrate)-226.4		131	226.44:1.75		primary cpd.		2-Hydroxybutyrate	known		21±11	68±18	11±9	0.7	16.1	0.93	0	3.5	21±7	67±12	12±7	0.8	17.8	0.9	0.01	3.8		20±11	69±18	11±8	0.7	15.9	0.93	0	3.5	21±7	68±12	12±7	0.8	17.7	0.9	0.01	3.7
15	(2-Aminobutyrate)-249.5		130	249.52:1.75		primary cpd.		2-Aminobutyrate	known		23±7	57±13	20±8	1	28.2	0.9	0	4.9	23±5	56±13	21±9	1	26.5	0.89	0.01	4.6		23±7	58±14	20±9	1	27.9	0.9	0	4.8	23±5	56±13	21±9	1	26.3	0.89	0.01	4.6
16	(2-Oxobutanoate)-252.6		188	252.59:1.75		primary cpd.		2-Oxobutanoate	known		37±2	46±9	17±8	0.6	16.7	0.96	0	3.4	37±4	45±11	18±7	0.7	14.8	0.96	0	3.3		37±2	47±8	17±8	0.6	16.4	0.96	0	3.3	37±4	46±10	18±7	0.7	14.7	0.96	0	3.3
17	(Valine)-272.0		144	272:1.75		primary cpd.		Valine	known		18±14	67±27	15±13	1	35.4	0.9	0.01	4.6	19±8	64±17	17±10	1	29.9	0.86	0.02	4.5		19±14	67±29	15±13	1	34.9	0.9	0.01	4.6	19±8	65±18	17±10	1	29.7	0.86	0.02	4.5
18	(Glycerol)-292.7		117	292.7:1.75		primary cpd.		Glycerol	known		27±11	73±11	0±0	2	105.1	0.55	0.14	9.7	27±6	73±6	0±0	1.9	99.3	0.58	0.13	9.3		27±11	70±9	0±0	2	103.3	0.56	0.14	9	27±6	70±6	0±0	1.9	97.3	0.59	0.12	8.8
19	(4-Hydroxypyridine)-293.9		152	293.91:1.75		primary cpd.		4-Hydroxypyridine	known		20±9	48±8	32±5	1	41.9	0.91	0.01	5.3	20±7	48±14	32±8	1.2	41.5	0.87	0.01	5.6		20±10	49±10	32±5	1	41.2	0.91	0.01	5.2	20±7	49±14	32±8	1.2	41.2	0.87	0.01	5.6
20	(Leucine)-305.4		158	305.4:1.75		primary cpd.		Leucine	known		22±14	67±19	11±6	0.7	15.7	0.95	0	3.5	22±8	66±13	12±6	0.8	18.8	0.9	0.01	3.9		22±14	67±21	11±6	0.7	15.4	0.95	0	3.4	22±8	67±13	12±6	0.8	18.7	0.9	0.01	3.8
21	(Isoleucine)-319.6		158	319.6:1.75		primary cpd.		Isoleucine	known		28±8	49±14	23±6	0.8	14.9	0.94	0	3.8	28±5	49±11	23±6	0.7	13.8	0.94	0	3.5		28±8	50±14	22±6	0.8	14.8	0.95	0	3.8	28±5	49±11	23±6	0.7	13.7	0.94	0	3.5
22	(Glycine (P1.1))-325.7		174	325.68:1.75		primary cpd.		Glycine (P1.1)	known		9±1	81±17	11±17	1.1	31	0.79	0.03	5.5	8±4	82±14	10±13	0.9	23.2	0.76	0.05	4.4		9±1	80±18	11±17	1.1	30.4	0.8	0.02	5.3	8±4	81±14	10±13	0.9	23.1	0.76	0.04	4.4
23	(Proline)-339.0		142	339:1.75		primary cpd.		Proline	known		67±6	26±12	7±6	1.6	78.1	0.92	0	7.6	66±9	29±11	5±6	1.5	62.5	0.93	0	7.1		67±6	25±10	7±6	1.6	77.2	0.92	0	7.4	66±9	28±11	5±6	1.5	61.9	0.93	0	6.9
24	(Glycerate)-345.0		103	345:1.75		primary cpd.		Glycerate	known		27±10	53±19	20±11	0.8	17	0.93	0	3.9	27±6	52±13	21±8	0.7	15.2	0.93	0	3.6		27±10	53±20	21±10	0.8	16.9	0.93	0	3.9	27±6	52±13	21±8	0.7	15.2	0.93	0	3.6
25	(Benzoate)-348.1		105	348.14:1.75		primary cpd.		Benzoate	known		15±4	67±11	18±12	1.1	32.3	0.8	0.02	5.8	15±6	67±16	18±12	1	24.6	0.84	0.01	4.8		15±3	67±13	18±13	1.1	32.1	0.81	0.02	5.7	15±6	67±16	18±12	0.9	24.5	0.84	0.01	4.7
26	(Serine)-358.6		204	358.58:1.75		primary cpd.		Serine	known		0±0	98±3	2±3	2	125.1	0.41	0.38	10.2	1±1	97±4	2±4	2	110	0.3	0.4	9.9		0±0	95±2	2±4	2	122.8	0.41	0.38	9.8	1±1	95±4	2±4	2	107.9	0.3	0.4	9.6
27	(Threonine)-368.1		219	368.1:1.75		primary cpd.		Threonine	known		3±5	97±5	0±0	1.8	93.7	0.24	0.47	10	3±4	97±4	0±1	1.8	85.1	0.15	0.56	9.2		3±4	95±4	0±0	1.8	91.9	0.24	0.47	9.8	3±4	95±4	0±1	1.8	83.5	0.15	0.56	9.1
28	(Fumarate (|Maleate))-372.0		245	372.02:1.50		primary cpd.		Fumarate (|Maleate)	known		5±8	95±8	0±0	2.5	174.9	0.2	0.39	12.5	5±7	95±7	0±1	2.4	152	0.16	0.53	12.1		5±8	92±6	0±0	2.5	171.8	0.2	0.39	12.1	5±7	92±7	0±1	2.3	149.6	0.16	0.53	11.8
29	(Nicotinate)-386.1		180	386.14:1.75		primary cpd.		Nicotinate	known		0±1	63±5	37±4	0.9	23.6	0.91	0	4.9	0±1	63±7	36±6	0.8	18.4	0.92	0	4.2		1±1	63±5	37±4	0.9	23.5	0.91	0	4.8	0±1	63±7	36±6	0.8	18.4	0.92	0	4.2
30	(Pyrrole-2-carboxylate)-388.5		240	388.53:1.75		primary cpd.		Pyrrole-2-carboxylate	known		0±0	81±18	19±18	2.9	225.8	0.37	0.2	15.2	0±0	82±13	18±13	2.9	221	0.36	0.28	14.7		0±0	81±20	19±18	2.9	224.9	0.37	0.2	15.4	0±0	82±13	18±13	2.9	220.4	0.36	0.28	14.8
31	(b-Alanine (P1.1))-395.2		174	395.21:1.75		primary cpd.		b-Alanine (P1.1)	known		18±3	71±3	11±1	0.8	18.4	0.92	0	4	18±3	70±7	12±5	0.8	16.6	0.9	0	3.7		18±2	71±3	11±1	0.8	18.1	0.92	0	3.9	18±3	71±7	11±5	0.8	16.5	0.9	0	3.7
32	(Homoserine)-407.6		128	407.61:1.75		primary cpd.		Homoserine	known		41±2	54±3	5±4	1	25	0.95	0	4.9	41±5	55±9	4±6	0.9	21.7	0.95	0	4.3		41±2	54±4	5±4	1	24.5	0.95	0	4.8	41±5	55±8	4±6	0.9	21.6	0.95	0	4.2
33	(Erythritol|Threitol)-409.3		103	409.3:1.75		primary cpd.		Erythritol|Threitol	known		17±3	20±4	63±7	0.8	22.4	0.96	0	4	17±4	20±11	63±7	0.8	20.2	0.96	0	3.9		17±3	20±3	63±7	0.8	22.2	0.96	0	4.1	17±4	20±11	63±7	0.8	20.1	0.96	0	3.9
34	(Malate)-442.3		233	442.31:1.75		primary cpd.		Malate	known		2±4	98±4	0±0	1.6	65.8	0.22	0.56	8.5	3±4	97±4	0±1	1.5	57.4	0.19	0.52	7.8		2±4	95±2	0±0	1.6	64.1	0.22	0.56	8.3	3±4	95±4	0±1	1.5	56.2	0.19	0.52	7.6
35	(trans-4-Hydroxyproline)-449.4		140	449.35:1.75		primary cpd.		trans-4-Hydroxyproline	known		35±7	63±8	2±4	1.6	74.6	0.84	0.01	8.1	35±7	62±10	3±5	1.5	66.2	0.82	0.02	7.4		35±7	63±10	2±4	1.6	73.9	0.84	0.01	7.8	35±7	62±10	3±5	1.5	65.9	0.82	0.02	7.3
36	(4-Aminobutanoate)-453.6		174	453.64:1.75		primary cpd.		4-Aminobutanoate	known		9±5	48±11	43±6	0.8	22.9	0.94	0	4	9±3	47±10	44±7	0.8	18.3	0.94	0	3.7		9±5	49±13	43±6	0.8	22.5	0.94	0	3.9	9±3	48±10	44±8	0.8	18.2	0.94	0	3.7
37	(Aspartate)-457.9		232	457.9:1.75		primary cpd.		Aspartate	known		74±21	26±21	0±0	2.1	123.7	0.87	0.01	10.6	73±11	27±11	0±0	2	112.1	0.9	0.01	10.3		74±21	23±17	0±0	2.1	120.3	0.88	0.01	10.1	73±11	23±10	0±0	2	109.4	0.9	0.01	9.9
38	(Threonate)-458.6		292	458.6:1.75		primary cpd.		Threonate	known		64±8	34±10	2±3	0.7	12.4	0.99	0	3.1	64±5	34±7	2±3	0.6	10.7	0.99	0	3		64±7	34±9	1±3	0.7	12.2	0.99	0	3	64±5	34±7	2±3	0.6	10.6	0.99	0	2.9
39	(Arginine)-491.1		142	491.11:1.75		primary cpd.		Arginine	known		97±3	3±3	0±0	1.9	116.9	0.98	0	8.9	99±2	1±2	0±0	1.6	69.3	0.98	0	7.8		103±12	2±2	0±0	1.7	82.8	0.98	0	8.5	103±6	1±2	0±0	1.4	53.2	0.98	0	7
40	(Xylose (P1.2))-493.8		103	493.8:1.75		primary cpd.		Xylose (P1.2)	known		8±3	13±6	79±7	0.9	21.1	0.97	0	4.2	8±3	13±10	78±8	0.8	18.5	0.97	0	4		8±3	13±8	79±8	0.8	20.8	0.97	0	4.1	8±3	13±10	79±9	0.8	18.2	0.97	0	3.9
41	(Arabinose|Lyxose|Xylose)-498.2		103	498.18:1.75		primary cpd.		Arabinose|Lyxose|Xylose	known		5±5	34±13	61±12	1.2	39.3	0.93	0	6.2	5±4	34±12	61±9	1.2	40.7	0.92	0	6.1		5±5	35±10	61±12	1.2	38.8	0.93	0	6	5±4	35±11	61±9	1.2	40.6	0.92	0	6.1
42	(Ribose (|Ribulose))-501.8		103	501.75:1.75		primary cpd.		Ribose (|Ribulose)	known		3±4	43±7	54±7	1.1	32.4	0.93	0	5.4	3±3	44±8	53±6	1.1	32.7	0.93	0	5.3		3±4	44±5	53±7	1.1	32	0.93	0	5.2	3±3	45±7	53±6	1.1	32.6	0.93	0	5.3
43	(5-Oxoproline)-507.0		156	507.05:1.75		primary cpd.		5-Oxoproline	known		16±7	84±7	0±0	1.9	97.9	0.35	0.37	9.1	16±7	84±7	0±0	1.8	84.2	0.37	0.33	8.7		16±7	82±4	0±0	1.9	95.5	0.34	0.4	8.9	16±7	82±6	0±0	1.8	82.7	0.37	0.32	8.5
44	(Glutamate)-508.3		246	508.25:1.75		primary cpd.		Glutamate	known		58±25	42±25	0±0	3.6	364.5	0.55	0.15	19.8	58±14	42±14	0±0	3.8	367.9	0.59	0.1	19.8		58±25	35±21	0±0	3.6	355.3	0.57	0.13	19	58±14	36±12	0±0	3.7	359.4	0.6	0.09	18.9
45	(Rhamnose)-516.6		117	516.56:1.75		primary cpd.		Rhamnose	known		1±1	15±7	84±7	0.9	30.9	0.96	0	4.2	1±1	16±8	84±8	0.8	22.9	0.97	0	4		1±1	16±8	84±7	0.9	30.6	0.96	0	4.2	1±1	16±8	84±8	0.8	22.8	0.97	0	4
46	(Putrescine (P1.1))-517.9		174	517.9:1.75		primary cpd.		Putrescine (P1.1)	known		45±11	33±11	23±2	0.5	7.8	0.98	0	2.7	45±6	33±10	22±6	0.6	8.8	0.98	0	2.7		44±11	34±12	22±2	0.5	7.7	0.98	0	2.7	45±6	33±11	22±6	0.6	8.7	0.98	0	2.7
47	((Fucose|Epifucose) (P1.1))-523.0		117	523:1.75		primary cpd.		Fucose|Epifucose	known		5±5	43±11	51±6	1.1	41.5	0.91	0.01	5.4	4±4	45±11	50±8	1.1	36.1	0.91	0	5.3		5±5	44±13	51±6	1.1	41	0.92	0.01	5.5	4±4	46±11	50±8	1.1	35.9	0.91	0	5.3
48	(Arabinono-1,4-lactone (P1.1))-526.0		117	526.05:1.75		primary cpd.		Arabinono-1,4-lactone (P1.1)	known		3±3	19±19	78±17	1.2	37	0.95	0	5.9	2±2	20±11	78±11	1.2	38.2	0.95	0	5.9		3±3	19±19	79±17	1.2	36.9	0.95	0	5.9	2±2	20±11	78±11	1.2	38.1	0.95	0	5.9
49	(Glutamine (P1.1))-530.6		227	530.57:1.75		primary cpd.		Glutamine (P1.1)	known		89±10	11±10	0±0	2.2	122.7	0.94	0	11.7	91±8	9±8	0±0	2	100.4	0.95	0	10		91±13	8±7	0±0	2.1	116.2	0.94	0	11.1	92±8	6±6	0±0	1.9	97.3	0.95	0	9.6
50	(Phenylalanine)-531.1		218	531.1:1.75		primary cpd.		Phenylalanine	known		31±10	60±18	9±9	0.7	13.5	0.95	0	3.4	32±6	58±11	10±7	0.6	11.6	0.95	0	3.1		31±10	59±19	10±9	0.7	13.4	0.95	0	3.4	32±6	58±11	10±7	0.6	11.6	0.95	0	3.1
51	(4-Hydroxybenzoate)-535.8		223	535.8:1.75		primary cpd.		4-Hydroxybenzoate	known		5±8	70±20	25±26	2.2	119.7	0.53	0.13	11.5	6±8	71±22	23±20	2	114.2	0.52	0.19	10.6		5±8	69±23	25±26	2.2	118.8	0.53	0.13	11.5	6±8	70±21	23±20	2	113.7	0.52	0.19	10.5
52	(Asparagine)-550.4		116	550.41:1.75		primary cpd.		Asparagine	known		80±9	20±9	0±0	2.1	139.1	0.91	0	11.2	81±8	19±8	0±0	2.1	124	0.91	0	11		80±8	16±7	0±0	2.1	136.8	0.91	0	10.5	81±8	16±8	0±0	2.1	122.1	0.91	0	10.5
53	(Levoglucosan-like)-556.6-Exp		204	556.61:1.50		primary cpd.		Levoglucosan-like	known		0±0	50±34	50±34	2.8	222.7	0.55	0.19	13.9	0±0	51±18	49±18	2.9	232.7	0.57	0.13	14.4		0±0	49±31	50±34	2.8	221.3	0.56	0.19	13.6	0±0	50±18	49±18	2.9	231.7	0.57	0.12	14.3
54	(2-Deoxygalactose)-562.4		217	562.39:1.75		primary cpd.		2-Deoxygalactose	known		49±7	16±27	36±26	1.1	37.8	0.97	0	5.7	52±8	10±13	39±16	1	28.1	0.97	0	5		50±7	16±27	37±27	1	34.5	0.97	0	5.2	52±7	10±14	40±17	1	26.4	0.97	0	4.7
55	(Psicose (P1.2))-573.7		217	573.73:1.75		primary cpd.		Psicose (P1.2)	known		6±6	50±28	44±32	1.7	83	0.77	0.03	8.2	5±6	53±20	43±19	1.9	95.9	0.74	0.04	9		6±5	51±28	44±32	1.7	82.9	0.77	0.03	8.3	5±6	53±21	43±20	1.9	95.6	0.75	0.04	9
56	(Glycerol 3-P)-574.3		299	574.35:1.75		primary cpd.		Glycerol 3-P	known		100±0	0±0	0±0	4.1	438.2	0.97	0	17.9	100±0	0±0	0±0	4.1	427.3	0.98	0	17.9		122±4	0±0	0±0	3	252.8	0.97	0	16.2	122±3	0±0	0±0	3	239.6	0.98	0	16.1
57	(Fructose (|Psicose))-580.1		103	580.06:1.75		primary cpd.		Fructose (|Psicose)	known		4±7	86±9	10±5	1.7	77.6	0.48	0.15	8.7	3±5	87±9	10±7	1.5	63	0.51	0.16	7.6		4±7	85±9	10±5	1.7	76.8	0.49	0.14	8.5	3±5	86±9	10±7	1.5	62.6	0.52	0.16	7.5
58	(Fructose|Sorbose)-586.0		217	586:1.75		primary cpd.		Fructose|Sorbose	known		0±0	92±9	8±9	1.4	60	0.5	0.32	7.2	1±1	92±8	8±8	1.3	50.1	0.5	0.19	6.7		0±0	91±7	8±9	1.4	59.1	0.5	0.32	7.1	1±1	91±8	8±8	1.3	49.7	0.5	0.19	6.7
59	(Glucose (P1.1))-591.4		205	591.39:1.75		primary cpd.		Glucose (P1.1)	known		6±10	79±21	15±13	1.8	94.3	0.49	0.24	9.4	3±5	84±10	13±10	1.8	86.2	0.41	0.27	8.8		6±10	78±18	15±13	1.8	92.9	0.49	0.24	9.3	3±5	82±10	13±10	1.8	85.3	0.41	0.27	8.7
60	(Glutamine (P2.1))-598.8-Ref		156	598.77:1.75		primary cpd.		[Glutamine (P2.1)]	known		29±15	71±15	0±0	3.7	373.3	0.22	0.59	20.6	29±10	71±10	0±0	3.8	363.3	0.18	0.51	20.2		29±14	64±11	0±0	3.7	364.1	0.23	0.55	19.7	29±10	65±9	0±0	3.7	354.8	0.2	0.49	19.5
61	(Glucose (P1.2))-599.4		103	599.44:1.75		primary cpd.		Glucose (P1.2)	known		0±0	68±6	32±6	2.2	125.8	0.61	0.08	10.6	0±0	69±8	31±8	2.1	117.8	0.59	0.1	10.4		0±0	67±10	32±7	2.2	124.6	0.61	0.08	10.5	0±0	67±8	32±8	2.1	117.2	0.59	0.1	10.4
62	(Methylglucopyranoside)-613.6		204	613.57:1.75		primary cpd.		Methylglucopyranoside	known		0±0	5±9	95±9	2.4	190.9	0.95	0	11.1	0±0	2±4	98±4	2.1	125.5	0.94	0	10.5		0±0	5±8	102±19	2.2	145.3	0.95	0	11.3	0±0	2±4	104±9	2	107.3	0.94	0	10.3
63	(Lysine (P1.1))-616.2		174	616.2:1.75		primary cpd.		Lysine (P1.1)	known		54±6	45±9	2±3	0.7	17.1	0.97	0	3.7	53±4	46±6	1±2	0.7	14.1	0.98	0	3.4		53±6	44±8	2±3	0.7	16.8	0.98	0	3.7	53±4	45±6	1±2	0.7	13.9	0.98	0	3.4
64	(Galactono-1,4-lactone)-619.1		217	619.08:1.75		primary cpd.		Galactono-1,4-lactone	known		55±8	27±19	18±13	1.1	46.1	0.94	0	5.2	56±7	26±13	18±11	1.1	39.8	0.94	0	5.5		55±8	29±22	17±14	1.1	45.6	0.94	0	5.3	56±7	27±14	18±11	1.1	39.6	0.94	0	5.6
65	(Dehydroascorbate (P1.1))-625.5		173	625.46:1.75		primary cpd.		Dehydroascorbate (P1.1)	known		9±16	91±16	0±0	2.3	152.5	0.45	0.28	11.9	7±10	93±10	0±0	2.3	145.6	0.34	0.35	11.9		9±15	87±13	0±0	2.3	148.5	0.45	0.28	11.5	7±10	89±9	0±0	2.3	142	0.35	0.34	11.6
66	(Dehydroascorbate (P1.2))-635.9		173	635.87:1.75		primary cpd.		Dehydroascorbate (P1.2)	known		15±17	40±24	45±7	0.7	12.9	0.96	0	3.5	13±11	42±14	45±7	0.8	17.9	0.94	0	4		15±17	40±23	45±6	0.7	12.7	0.96	0	3.6	13±11	42±14	45±7	0.8	17.8	0.94	0	4
67	(Ascorbate)-651.8		332	651.75:1.75		primary cpd.		Ascorbate	known		36±4	6±11	58±7	1.1	30.3	0.96	0	5.6	37±4	4±7	60±6	1	26.8	0.96	0	5		37±5	6±10	59±8	1.1	28.7	0.96	0	5.1	37±4	4±7	61±6	1	25.2	0.96	0	4.6
68	(myo-Inositol)-654.5		217	654.46:1.75		primary cpd.		myo-Inositol	known		0±0	100±1	0±1	1.8	100.3	0.28	0.42	9.6	0±0	98±3	2±3	1.9	93.1	0.14	0.57	9.4		0±0	97±2	0±1	1.8	98.2	0.28	0.42	9.4	0±0	96±3	2±3	1.9	91.4	0.14	0.57	9.3
69	(Tyrosine)-659.1		218	659.1:1.75		primary cpd.		Tyrosine	known		39±11	44±16	17±6	0.9	19.7	0.95	0	4.2	39±7	43±13	18±7	0.8	18.3	0.95	0	3.8		39±11	45±17	17±6	0.9	19.4	0.95	0	4.1	39±7	44±13	18±7	0.8	18.2	0.95	0	3.8
70	(Sinapyl alcohol)-662.4		253	662.43:1.75		primary cpd.		Sinapyl alcohol	known		0±0	12±11	88±11	1.5	74.3	0.92	0.01	7.9	0±0	13±10	87±10	1.5	60.8	0.93	0	7.2		0±0	13±12	87±11	1.5	73.9	0.92	0.01	8	0±0	13±10	87±10	1.5	60.5	0.93	0	7.2
71	(N-Acetylgalactosamine (P1.2))-675.0		205	675:1.75		primary cpd.		N-Acetylgalactosamine (P1.2)	known		1±2	54±8	45±8	1	26.9	0.91	0	4.9	1±2	53±8	46±7	0.9	22.8	0.92	0	4.5		1±1	53±7	45±8	1	26.7	0.91	0	4.8	1±2	52±8	46±7	0.9	22.7	0.93	0	4.4
72	(N-Acetylmannosamine (P1.2))-680.9		205	680.91:1.75		primary cpd.		N-Acetylmannosamine (P1.2)	known		9±7	33±34	58±29	1.5	67.3	0.88	0.01	7.9	10±8	31±23	59±18	1.4	58.4	0.88	0.01	7		9±7	34±34	58±29	1.5	67.1	0.88	0.01	7.9	10±8	31±23	59±19	1.4	57.9	0.89	0.01	6.9
73	(Hexanoate)-206.6-Exp		117	206.55:1.75		primary cpd.		Hexanoate	known		10±8	73±14	17±7	1.6	63.7	0.67	0.06	8.1	8±7	76±11	16±7	1.5	58.8	0.7	0.05	7.6		10±8	74±12	17±7	1.6	63.5	0.67	0.05	8	8±7	77±10	16±7	1.5	58.6	0.7	0.05	7.5
74	(Phytol (P1.2))-716.5		143	716.55:1.75		primary cpd.		Phytol (P1.2)	known		90±10	5±9	5±6	0.9	23.1	0.99	0	4.7	92±6	4±5	5±4	0.9	22.7	0.99	0	4.7		92±12	6±10	5±6	0.9	19.8	0.99	0	4.1	92±6	4±5	6±5	0.9	20.8	0.99	0	4.4
75	(3-Indoleacetonitrile)-724.0		228	724:1.75		primary cpd.		3-Indoleacetonitrile	known		6±7	34±26	60±21	0.8	18.2	0.96	0	3.9	7±4	34±15	59±12	0.8	17.7	0.96	0	3.9		6±7	35±27	59±21	0.8	17.9	0.96	0	3.9	7±4	35±15	59±12	0.8	17.5	0.96	0	3.9
76	(Spermidine)-724.8		144	724.77:1.75		primary cpd.		Spermidine	known		61±4	16±14	22±14	0.8	16.9	0.98	0	3.6	61±5	16±12	23±10	0.7	12.8	0.98	0	3.2		61±4	16±13	22±13	0.7	16.7	0.98	0	3.5	62±5	16±12	23±10	0.7	12.7	0.98	0	3.1
77	(Phytol (P1.1))-734.1		143	734.1:1.75		primary cpd.		Phytol (P1.1)	known		90±6	9±8	1±2	0.6	11.2	0.99	0	3.2	90±5	10±5	0±1	0.6	10.2	0.99	0	3.1		90±6	9±7	1±2	0.6	11.2	0.99	0	3.1	90±5	10±5	0±1	0.6	10.1	0.99	0	3.1
78	(Sinapate (P1.2))-752.8		338	752.84:1.75		primary cpd.		Sinapate (P1.2)	known		0±0	20±14	80±14	2.4	154.9	0.82	0.02	12.2	0±0	21±10	79±10	2.4	147.1	0.83	0.01	12.2		0±0	20±11	80±13	2.4	154.3	0.82	0.02	12.2	0±0	20±10	79±10	2.4	146.7	0.83	0.01	12.2
79	(Tryptophan)-791.1		202	791.09:1.75		primary cpd.		Tryptophan	known		81±11	18±14	2±3	1.2	42.2	0.97	0	6.6	81±7	18±8	1±2	1.1	32.4	0.98	0	5.6		81±11	17±13	2±3	1.2	42.1	0.97	0	6.5	81±7	18±8	1±2	1.1	32.2	0.98	0	5.6
80	(Sinapate (P1.1))-817.9		338	817.88:1.75		primary cpd.		Sinapate (P1.1)	known		0±0	86±13	14±13	1.3	45.6	0.61	0.11	7.2	0±0	86±8	14±8	1.3	44.5	0.63	0.07	7		0±0	85±12	14±13	1.3	45.2	0.61	0.1	7.1	0±0	85±8	14±8	1.3	44.3	0.63	0.07	6.9
81	(Sucrose (P1.1))-841.4		217	841.44:1.75		primary cpd.		Sucrose (P1.1)	known		0±1	88±19	11±20	2.6	194.4	0.22	0.36	13.4	1±2	90±14	9±14	2.6	179.7	0.23	0.42	13.4		0±0	84±20	11±20	2.5	190.1	0.22	0.35	13.1	1±2	86±14	10±14	2.6	176.2	0.24	0.42	13
82	(Lactose (|Lactulose))-858.6		204	858.61:1.75		primary cpd.		Lactose (|Lactulose)	known		8±4	23±25	69±22	1.6	80.6	0.9	0.01	7.6	8±5	23±17	69±13	1.6	76.1	0.88	0.01	8		8±4	25±25	69±22	1.5	79.7	0.9	0.01	7.7	9±5	24±17	69±14	1.6	75.3	0.89	0.01	7.9
83	(Cellobiose)-862.3		204	862.26:1.75		primary cpd.		Cellobiose	known		0±0	56±11	44±11	1.2	46	0.9	0.01	6.3	0±1	55±11	45±11	1.2	38.6	0.89	0.01	5.7		0±0	57±14	44±12	1.2	45.3	0.9	0.01	6.5	0±1	55±12	44±11	1.2	38.4	0.89	0.01	5.8
84	(Glycine (P2.1))-228.1-Exp		102	228.14:1.75		primary cpd.		[Glycine (P2.1)]	known		25±5	67±12	8±8	0.7	15.8	0.93	0	3.9	24±4	70±8	6±6	0.7	13.1	0.93	0	3.3		25±4	68±10	8±7	0.7	15.5	0.93	0	3.8	24±4	70±8	6±6	0.7	13	0.93	0	3.3
85	(Maltose|Laminaribiose)-871.0		204	870.98:1.75		primary cpd.		Maltose|Laminaribiose	known		41±9	50±11	8±4	0.8	17.2	0.96	0	3.8	42±6	50±12	9±6	0.7	15.3	0.97	0	3.4		41±9	51±10	8±4	0.8	17	0.96	0	3.8	41±6	50±11	8±6	0.7	15.2	0.97	0	3.4
86	(Maltose (P1.2))-880.2		204	880.19:1.75		primary cpd.		Maltose (P1.2)	known		0±0	44±17	56±17	1.5	66.1	0.87	0.01	6.7	0±1	43±12	56±12	1.4	56.9	0.88	0.01	6.5		0±0	44±16	56±17	1.5	65.9	0.87	0.01	6.7	0±1	43±12	56±12	1.4	56.7	0.88	0.01	6.4
87	(Lactobionate-like)-891.7-Exp		204	891.73:1.50		primary cpd.		Lactobionate-like	known		24±10	71±18	5±8	2.3	167.1	0.53	0.17	12.2	25±10	73±13	2±6	2.2	133.2	0.53	0.16	10.9		24±9	70±16	5±8	2.3	165.3	0.53	0.17	11.9	25±10	72±13	2±6	2.2	132.3	0.53	0.16	10.7
88	(Docosanoate)-904.0		117	904:1.75		primary cpd.		Docosanoate	known		14±18	81±21	5±4	1.7	72.6	0.63	0.06	7.7	13±13	81±16	6±6	1.5	62.5	0.65	0.08	7.4		14±18	81±21	5±4	1.7	72.2	0.63	0.06	7.5	13±13	82±15	6±6	1.5	62.3	0.65	0.08	7.3
89	(Gentiobiose (P1.2))-909.7		204	909.69:1.75		primary cpd.		Gentiobiose (P1.2)	known		0±0	82±11	18±11	0.9	23.8	0.86	0.01	4.7	0±1	81±6	19±6	1	25	0.85	0.01	4.8		0±0	82±10	18±11	0.9	23.7	0.86	0.01	4.7	0±1	81±6	19±6	0.9	25	0.85	0.01	4.7
90	(Melibiose (P1.1))-914.3		204	914.29:1.75		primary cpd.		Melibiose (P1.1)	known		19±6	11±10	69±5	0.9	26.7	0.95	0	4.3	20±4	10±9	71±7	0.9	21.7	0.96	0	4		19±6	11±10	70±6	0.9	26.3	0.95	0	4.2	20±5	10±9	71±7	0.8	21.5	0.96	0	4
91	(Galactinol)-940.2		204	940.24:1.75		primary cpd.		Galactinol	known		16±2	82±4	3±3	0.9	25.4	0.86	0.01	4.7	16±3	81±7	3±5	0.9	21.1	0.85	0.01	4.2		16±2	81±5	3±3	0.9	25	0.86	0.01	4.6	16±3	81±7	3±5	0.9	20.9	0.85	0.01	4.1
92	(Tetracosanoate)-963.6		117	963.6:1.75		primary cpd.		Tetracosanoate	known		5±9	90±14	5±5	1.5	54	0.61	0.07	7	6±7	87±12	7±7	1.3	44.7	0.67	0.06	6.4		5±9	90±14	5±5	1.5	53.6	0.61	0.07	6.8	6±7	87±11	7±6	1.3	44.5	0.67	0.05	6.4
93	(3-Hydroxypyridine)-283.0-Exp		152	282.99:1.50		primary cpd.		3-Hydroxypyridine	known		32±14	38±17	30±7	1.2	42.7	0.89	0.01	5.8	31±9	38±14	30±7	1.2	40.8	0.88	0.01	5.5		32±14	39±16	30±6	1.2	42.3	0.89	0.01	5.8	31±9	39±14	30±7	1.2	40.6	0.88	0.01	5.5
94	(Raffinose (|1-Kestose|Inulotriose))-1033.3		217	1033.31:1.75		primary cpd.		Raffinose (|1-Kestose|Inulotriose)	known		0±0	77±10	23±10	1.1	41.2	0.84	0.02	5.5	0±0	77±6	23±6	1.2	38.1	0.81	0.02	5.6		0±0	77±8	23±9	1.1	40.8	0.84	0.01	5.6	0±0	77±6	23±6	1.2	37.9	0.81	0.02	5.7
95	(Ethanolamine)-284.0-Exp		174	284.01:1.50		primary cpd.		Ethanolamine	known		9±11	90±12	1±1	1.2	41.8	0.6	0.1	6.5	8±8	91±10	1±3	1.2	40.4	0.54	0.15	6.3		9±11	90±12	1±1	1.2	41.5	0.6	0.11	6.4	8±8	90±10	1±3	1.2	40.1	0.54	0.15	6.2
96	(Octacosanoate)-1072.0		117	1071.97:1.75		primary cpd.		Octacosanoate	known		7±8	85±7	8±11	1.9	93	0.49	0.14	9.8	8±7	83±13	10±11	1.7	76.3	0.51	0.19	8.9		7±7	85±9	8±12	1.9	92.4	0.5	0.14	9.5	8±7	82±13	10±11	1.7	75.8	0.51	0.18	8.9
97	(Urea)-340.8-Exp		171	340.77:1.50		primary cpd.		Urea	known		9±6	88±10	2±4	1.1	31.5	0.58	0.09	5.5	9±4	90±6	1±3	1.1	29.5	0.57	0.09	5.3		9±6	87±9	2±4	1.1	31	0.58	0.09	5.4	9±4	89±6	2±3	1.1	29.2	0.58	0.09	5.2
98	(Trehalose)-876.1-Exp		191	876.08:1.50		primary cpd.		Trehalose	known		23±2	64±10	12±8	1.2	35.1	0.77	0.04	5.7	23±4	65±11	12±8	1	28.7	0.82	0.02	5.1		23±1	65±8	12±8	1.2	35	0.77	0.04	5.7	23±4	65±11	12±8	1	28.6	0.82	0.02	5.1
99	(Campesterol)-1107.3		129	1107.3:1.75		primary cpd.		Campesterol	known		0±0	0±0	100±0	1.5	60	0.98	0	7.6	0±0	0±1	100±1	1.4	55.1	0.98	0	7.2		0±0	0±0	106±4	1.4	48.3	0.98	0	7.3	0±0	0±1	106±4	1.3	43.2	0.98	0	6.7
100	(Triacontanoate)-1121.7		117	1121.72:1.75		primary cpd.		Triacontanoate	known		15±14	69±8	15±8	1.4	47.7	0.76	0.02	6.8	15±11	69±18	16±12	1.1	31.6	0.8	0.03	5.3		15±14	69±6	15±8	1.4	47.3	0.77	0.02	6.8	15±11	69±18	16±12	1.1	31.4	0.81	0.03	5.2
101	(Sitosterol)-1128.3		129	1128.26:1.75		primary cpd.		Sitosterol	known		0±0	5±8	95±8	1.8	79.3	0.92	0	9.3	0±0	6±7	94±7	1.7	71	0.93	0	8.4		0±0	5±6	96±8	1.8	78.2	0.93	0	9.2	0±0	5±7	95±9	1.6	69.3	0.93	0	8.3
102	(Hexacosanoate)-1018.9-Exp		117	1018.85:1.50		primary cpd.		Hexacosanoate	known		6±7	75±16	19±9	1.2	35.3	0.81	0.02	5.5	7±6	73±13	20±9	1	29.1	0.83	0.01	5.1		7±7	75±15	19±9	1.2	35	0.81	0.01	5.4	7±6	73±13	20±9	1	28.9	0.83	0.01	5
103	(Unknown)-203.4-Exp		89	203.44:1.75		primary cpd.		unknown	unknown		95±6	5±6	0±0	2.1	113.6	0.96	0	10.4	96±5	4±5	0±0	1.7	79	0.97	0	8.6		99±11	3±3	0±0	2	98	0.96	0	9.7	99±7	2±4	0±0	1.6	71.3	0.97	0	8.1
104	(Unknown)-217.5-Exp		85	217.46:1.75		primary cpd.		unknown	unknown		0±0	61±24	39±24	3.9	452.5	0.4	0.32	18.9	0±0	61±18	39±18	3.8	394.2	0.4	0.26	18.7		0±0	58±23	40±23	3.9	448.8	0.41	0.31	18.8	0±0	59±18	39±18	3.8	392.6	0.4	0.25	18.5
105	(Unknown)-231.5-Exp		85	231.53:1.75		primary cpd.		unknown	unknown		0±0	62±21	38±21	3.8	402.1	0.39	0.3	17.9	0±0	62±16	38±16	3.6	348.2	0.42	0.23	17.5		0±0	59±20	39±21	3.8	399	0.39	0.29	18	0±0	60±16	39±16	3.6	346.8	0.42	0.23	17.4
106	(Unknown)-234.5-Exp		140	234.49:1.75		primary cpd.		unknown	unknown		0±0	28±20	72±20	2.1	112.8	0.84	0.01	9.9	0±0	29±10	71±10	2.1	117.8	0.83	0.01	10.5		0±0	27±19	72±20	2.1	111.9	0.84	0.01	9.9	0±0	28±10	72±10	2.1	117.4	0.84	0.01	10.6
107	(Unknown)-236.8-Exp		102	236.77:1.75		primary cpd.		unknown	unknown		0±0	72±26	28±26	3.8	367	0.36	0.25	19	0±0	74±19	26±19	3.5	333.1	0.31	0.35	17.6		0±0	71±29	28±26	3.8	365.7	0.36	0.25	19.2	0±0	72±19	27±19	3.5	332	0.32	0.34	17.7
108	(Unknown)-245.9-Exp		177	245.94:1.75		primary cpd.		unknown	unknown		31±8	38±8	31±2	0.7	15.5	0.96	0	3.4	31±5	37±10	32±6	0.7	15.5	0.95	0	3.5		31±7	38±9	31±2	0.7	15.3	0.96	0	3.3	31±5	38±10	32±6	0.7	15.4	0.95	0	3.5
109	(Unknown)-274.9-Exp		154	274.9:1.50		primary cpd.		unknown	unknown		4±8	92±5	4±5	1.7	78.2	0.47	0.14	9	4±7	90±10	5±7	1.5	63.9	0.53	0.14	7.8		4±8	92±4	4±4	1.7	78	0.47	0.14	9	4±7	90±10	5±7	1.5	63.7	0.53	0.13	7.8
110	(Unknown)-353.8-Exp		100	353.8:1.50		primary cpd.		unknown	unknown		0±0	0±0	100±0	3.1	254.8	0.98	0	15.1	0±0	0±0	100±0	3.1	245.8	0.98	0	14.7		0±0	0±0	117±5	2.6	170.6	0.98	0	14.9	0±0	0±0	117±4	2.5	162.1	0.98	0	14.4
111	(Unknown)-361.8-Exp		113	361.84:1.50		primary cpd.		unknown	unknown		40±12	60±12	0±0	2.2	130.5	0.66	0.07	12.5	40±9	60±9	0±0	2.2	122.6	0.68	0.06	11.7		40±11	57±11	0±0	2.2	128.9	0.66	0.06	12.3	40±9	57±9	0±0	2.2	120.9	0.69	0.06	11.5
112	(Unknown)-368.9-Exp		110	368.89:1.50		primary cpd.		unknown	unknown		0±0	54±19	46±19	3.8	374.5	0.47	0.14	18.6	0±0	54±13	46±13	3.7	354.4	0.47	0.16	18		0±0	53±22	47±19	3.8	372.9	0.47	0.14	18.6	0±0	53±13	46±13	3.7	353.4	0.47	0.15	18
113	(Unknown)-375.6-Exp		100	375.64:1.50		primary cpd.		unknown	unknown		17±16	18±24	64±8	1.1	39.6	0.92	0	5.5	15±11	22±13	64±8	1.2	40	0.92	0	5.5		18±16	17±21	65±8	1.1	38.9	0.92	0	5.4	15±11	20±12	64±8	1.2	39.6	0.92	0	5.5
114	(Unknown)-389.0-Exp		110	388.99:1.50		primary cpd.		unknown	unknown		0±0	62±14	38±14	3.2	263.7	0.47	0.14	16.8	0±0	63±9	37±9	3.2	258.5	0.47	0.15	16.6		0±0	62±16	38±14	3.2	262.4	0.47	0.14	16.7	0±0	62±9	37±9	3.2	257.9	0.48	0.15	16.5
115	(Unknown)-396.4-Exp		156	396.41:1.50		primary cpd.		unknown	unknown		0±0	69±15	31±15	3.3	269.7	0.4	0.19	17.4	0±0	69±10	31±10	3.2	265.1	0.4	0.21	16.9		0±0	67±17	31±15	3.3	268.2	0.41	0.19	17.3	0±0	68±10	31±10	3.2	264.3	0.4	0.21	16.9
116	(Unknown)-401.7-Exp		171	401.67:1.50		primary cpd.		unknown	unknown		3±2	78±2	19±1	1.2	42.2	0.81	0.01	6.5	3±3	78±7	19±5	1.2	39	0.79	0.02	6		3±2	80±4	18±1	1.2	41.7	0.82	0.01	6.4	3±3	79±7	19±5	1.2	38.9	0.79	0.02	6
117	(Unknown)-428.5-Exp		194	428.51:1.50		primary cpd.		unknown	unknown		68±4	25±3	7±3	0.7	15.2	0.99	0	3.4	68±5	24±10	7±6	0.7	13.8	0.99	0	3.3		68±4	26±4	7±3	0.7	15	0.99	0	3.3	68±5	25±10	7±5	0.7	13.7	0.99	0	3.2
118	(Unknown)-431.7-Exp		171	431.68:1.50		primary cpd.		unknown	unknown		13±7	87±7	0±0	3.1	249.3	0.06	0.69	15.3	13±5	87±5	0±0	3.1	242	0.05	0.72	14.6		13±7	82±5	0±0	3.1	245.1	0.06	0.7	14.5	13±5	82±5	0±0	3.1	238.2	0.05	0.72	14
119	(Unknown)-452.3-Exp		128	452.32:1.50		primary cpd.		unknown	unknown		92±0	8±0	0±0	0.9	26.9	0.99	0	4.6	92±4	7±5	1±1	0.9	25.8	0.99	0	4.4		92±0	9±1	0±0	0.9	26.6	0.99	0	4.5	92±5	8±5	1±1	0.9	25.5	0.99	0	4.3
120	(Unknown)-560.9-Exp		217	560.89:1.50		primary cpd.		unknown	unknown		0±0	82±16	18±16	2.9	223.9	0.39	0.22	15.5	0±0	83±12	17±12	2.9	220.7	0.34	0.29	15.1		0±0	81±18	19±17	2.9	223.1	0.4	0.22	15.5	0±0	83±13	17±13	2.9	220.3	0.34	0.29	15.1
121	(Unknown)-605.8-Exp		95	605.79:1.50		primary cpd.		unknown	unknown		27±18	72±19	1±2	1.7	87	0.61	0.26	8.6	26±11	73±12	1±2	1.6	79.7	0.63	0.15	8		27±18	70±18	1±2	1.7	85.8	0.61	0.26	8.3	26±11	71±12	1±2	1.6	78.6	0.63	0.15	7.7
122	(Unknown)-608.3-Exp		117	608.32:1.50		primary cpd.		unknown	unknown		4±6	75±26	22±21	1.9	92.8	0.54	0.18	9.4	4±6	74±21	22±17	1.7	79	0.62	0.09	8.5		4±6	75±24	22±20	1.9	92.4	0.54	0.18	9.3	4±6	75±21	22±17	1.7	78.8	0.62	0.09	8.5
123	(Unknown)-618.8-Exp		95	618.83:1.50		primary cpd.		unknown	unknown		56±10	42±12	2±2	1.1	32.3	0.95	0	5.2	56±7	41±10	3±5	1	26.9	0.96	0	4.8		56±9	42±10	2±2	1.1	31.9	0.96	0	5	56±7	41±10	3±5	1	26.7	0.96	0	4.6
124	(Unknown)-627.1-Exp		95	627.07:1.50		primary cpd.		unknown	unknown		51±12	46±12	3±4	1	30.4	0.95	0	5	51±7	46±10	3±5	1	29.9	0.95	0	5		51±11	46±10	3±4	1	30	0.95	0	4.8	51±7	46±10	3±5	1	29.5	0.95	0	4.9
125	(Unknown)-731.5-Exp		204	731.5:1.50		primary cpd.		unknown	unknown		12±7	87±10	1±2	2.3	200.6	0.44	0.35	12.6	12±8	87±10	1±4	2.4	159.6	0.29	0.41	11.8		12±7	85±8	1±2	2.3	198.5	0.44	0.35	12.1	12±8	85±10	1±4	2.4	158.2	0.29	0.41	11.5
126	(Unknown)-738.0-Exp		103	738.01:1.50		primary cpd.		unknown	unknown		60±7	32±7	8±7	0.7	13.3	0.98	0	3.4	61±6	30±12	9±7	0.7	12.3	0.98	0	3.2		61±7	32±8	8±6	0.7	13.1	0.98	0	3.3	61±6	30±12	9±7	0.7	12.2	0.98	0	3.1
127	(Unknown)-752.3-Exp		204	752.35:1.50		primary cpd.		unknown	unknown		13±4	63±16	23±13	0.7	14.7	0.92	0	3.6	14±3	62±12	24±9	0.7	12.5	0.92	0	3.1		14±4	62±17	24±13	0.7	14.6	0.92	0	3.5	14±3	61±12	24±9	0.6	12.4	0.92	0	3.1
128	(Unknown)-768.9-Exp		204	768.86:1.50		primary cpd.		unknown	unknown		1±2	30±3	69±3	0.6	12.6	0.98	0	3	2±2	28±9	70±7	0.6	9.8	0.98	0	2.7		1±1	30±3	69±3	0.6	12.4	0.98	0	2.9	2±2	28±8	70±7	0.6	9.7	0.98	0	2.7
129	(Unknown)-983.6-Exp		204	983.62:1.50		primary cpd.		unknown	unknown		1±2	93±10	6±10	1.5	76.5	0.55	0.18	8.3	1±2	93±7	6±7	1.6	69.4	0.35	0.33	8		1±2	92±8	6±10	1.5	75	0.55	0.18	8.2	1±2	92±7	6±7	1.6	68.7	0.35	0.33	8
130	(Unknown)-1005.5-Exp		112	1005.5:1.50		primary cpd.		unknown	unknown		47±1	53±1	0±0	5	635.9	0.35	0.23	22.2	46±7	54±7	0±0	5	632.8	0.34	0.25	22.3		47±2	47±3	0±0	5	629.3	0.36	0.23	20.2	46±7	47±7	0±0	5	625.7	0.35	0.24	20.2
131	(Unknown)-1134.4-Exp		133	1134.35:1.50		primary cpd.		unknown	unknown		27±18	52±22	21±8	0.9	23.5	0.91	0	4.8	27±11	51±18	22±10	0.9	25.1	0.9	0.01	4.7		27±18	53±23	21±7	0.9	23.3	0.91	0	4.8	27±11	52±18	22±10	0.9	24.9	0.9	0.01	4.6
132	(Unknown)-1172.5-Ath		204	1172.47:1.75		primary cpd.		unknown	unknown		86±4	14±4	0±0	1.2	44.6	0.97	0	6.3	87±6	13±7	1±2	1.2	36.7	0.98	0	5.7		86±4	13±3	0±0	1.2	44.3	0.97	0	6.1	87±6	12±6	1±2	1.1	36.4	0.98	0	5.4
133	(Unknown)-1200.7-Exp		647	1200.72:1.75		primary cpd.		unknown	unknown		10±12	90±12	0±0	3.2	253.1	0.25	0.33	16.3	9±9	91±9	0±0	3.1	254.4	0.25	0.37	15.8		10±12	86±12	0±0	3.1	249.4	0.25	0.32	15.7	9±9	87±8	0±0	3.1	250.2	0.25	0.37	15.5
134	(Unknown)-273.1-Ath		188	273.1:1.50		primary cpd.		unknown	unknown		41±4	59±5	1±1	0.9	22.4	0.95	0	4.8	41±5	59±5	0±2	0.8	19	0.95	0	4.2		41±4	58±6	1±1	0.9	22.1	0.95	0	4.7	41±5	58±5	0±2	0.8	18.9	0.95	0	4.1
135	(Unknown)-287.8-Ath		89	287.77:1.50		primary cpd.		unknown	unknown		77±15	18±18	6±4	0.6	9.2	0.99	0	3	78±8	13±11	8±4	0.6	11.5	0.99	0	3.2		77±15	17±18	6±4	0.6	8.7	0.99	0	2.8	78±8	13±10	8±4	0.6	11.4	0.99	0	3.2
136	(Unknown)-304.0-Ath		89	303.97:1.50		primary cpd.		unknown	unknown		38±8	9±11	53±4	0.7	19.7	0.96	0	3.7	38±5	9±8	53±5	0.8	18.7	0.96	0	3.8		38±8	10±13	53±4	0.7	19.4	0.96	0	3.6	38±5	10±9	53±5	0.8	18.4	0.96	0	3.7
137	(Unknown)-309.4-Ath		198	309.39:1.50		primary cpd.		unknown	unknown		0±0	80±16	20±16	2.3	130.8	0.41	0.26	11.6	0±0	79±12	21±12	2.2	124.3	0.46	0.18	11.2		0±0	79±14	21±16	2.3	130.2	0.42	0.26	11.7	0±0	79±12	21±12	2.2	124	0.46	0.18	11.3
138	(Unknown)-316.9-Ath		89	316.93:1.50		primary cpd.		unknown	unknown		4±4	51±23	45±19	1.3	52.2	0.89	0.01	6.4	4±4	51±19	45±16	1.1	38.3	0.89	0.01	5.4		4±3	52±24	45±19	1.3	51.5	0.89	0.01	6.4	4±4	51±19	45±16	1.1	38.1	0.89	0.01	5.4
139	(Unknown)-321.1-Ath		150	321.13:1.50		primary cpd.		unknown	unknown		45±21	55±21	0±0	1.5	69.9	0.78	0.06	7.7	45±12	55±12	0±0	1.6	70.2	0.82	0.03	8.1		45±21	53±18	0±0	1.5	68.4	0.78	0.05	7.2	45±12	54±11	0±0	1.6	69.3	0.82	0.03	7.9
140	(Unknown)-346.5-Ath		157	346.49:1.50		primary cpd.		unknown	unknown		79±16	20±18	1±2	1.5	60.4	0.96	0	7.4	79±9	17±11	4±5	1.3	49.3	0.97	0	6.6		79±16	20±17	2±3	1.5	60.1	0.96	0	7.2	79±9	17±11	4±5	1.3	48.9	0.97	0	6.5
141	(Unknown)-348.8-Ath		174	348.77:1.50		primary cpd.		unknown	unknown		0±0	28±6	72±6	1.3	46.9	0.93	0	6.7	0±0	28±6	72±6	1.3	44	0.93	0	6.5		0±0	28±7	72±6	1.3	46.7	0.93	0	6.7	0±0	28±6	72±6	1.3	43.9	0.93	0	6.6
142	(Unknown)-355.0-Ath		217	354.96:1.50		primary cpd.		unknown	unknown		6±10	43±20	51±15	1.4	59.2	0.87	0.01	6.7	6±7	42±16	51±13	1.2	45.3	0.89	0.01	6		6±10	44±22	51±15	1.4	58.6	0.87	0.01	6.6	6±7	43±16	51±13	1.2	45.1	0.89	0.01	6
143	(Unknown)-376.0-Ath		245	376.01:1.50		primary cpd.		unknown	unknown		29±4	47±16	24±12	1	25.6	0.92	0	5.1	30±3	46±10	25±8	1	25	0.91	0	4.9		29±4	48±16	24±12	1	25.5	0.92	0	5.1	30±3	46±10	25±8	1	24.9	0.91	0	4.9
144	(Unknown)-401.2-Ath		196	401.19:1.50		primary cpd.		unknown	unknown		44±7	51±10	5±4	0.9	23.6	0.95	0	4.2	45±5	50±11	6±6	0.9	20.3	0.96	0	4.1		44±7	52±11	4±4	0.9	23.4	0.95	0	4.1	45±5	49±10	6±6	0.9	20.2	0.96	0	4
145	(Unknown)-412.8-Ath		101	412.83:1.50		primary cpd.		unknown	unknown		33±24	64±29	3±6	1.9	97	0.57	0.31	9.4	31±16	69±17	1±2	1.7	74.2	0.68	0.1	8.4		33±24	62±26	3±6	1.9	95.3	0.57	0.29	9.3	31±16	67±16	1±2	1.6	73.5	0.68	0.1	8.3
146	(Unknown)-418.2-Ath		112	418.21:1.50		primary cpd.		unknown	unknown		14±8	58±12	28±4	1.1	61.7	0.87	0.02	5.3	15±7	57±14	28±9	1.2	47.5	0.84	0.02	5.5		14±8	59±11	27±4	1.1	61	0.88	0.02	5.4	15±7	58±14	28±9	1.2	47.3	0.84	0.02	5.5
147	(Unknown)-419.1-Ath		103	419.07:1.50		primary cpd.		unknown	unknown		85±16	0±0	15±16	2.4	199	0.97	0	12.7	89±10	0±1	11±10	2.4	159.4	0.95	0	13.3		94±26	0±0	17±17	2	124.4	0.98	0	10.6	94±11	0±1	17±10	2.2	128.2	0.97	0	11.5
148	(Unknown)-426.5-Ath		131	426.46:1.50		primary cpd.		unknown	unknown		14±14	25±26	61±13	1	33.7	0.94	0	5	14±7	24±16	62±11	1	30.3	0.94	0	4.8		14±14	27±28	61±13	1	33.2	0.94	0	4.9	14±7	24±16	62±11	1	30	0.94	0	4.7
149	(Unknown)-426.6-Ath		175	426.58:1.50		primary cpd.		unknown	unknown		0±0	6±11	94±11	1.2	51.2	0.95	0	6.4	0±0	7±9	93±9	1.1	37.9	0.97	0	5.4		0±0	7±13	94±12	1.2	50.4	0.95	0	6.5	0±1	8±9	94±10	1.1	36.1	0.97	0	5.4
150	(Unknown)-434.7-Ath		117	434.7:1.50		primary cpd.		unknown	unknown		77±3	0±0	23±3	0.8	19.8	0.98	0	3.8	77±3	1±2	22±3	0.8	19.2	0.99	0	3.8		78±3	0±0	24±3	0.8	19	0.99	0	3.6	78±3	1±2	23±3	0.8	17.9	0.99	0	3.4
151	(Unknown)-435.1-Ath		131	435.09:1.50		primary cpd.		unknown	unknown		13±4	72±15	16±12	0.7	19.1	0.91	0	3.5	13±4	71±9	16±6	0.7	17	0.88	0.01	3.6		13±4	72±14	16±12	0.7	18.8	0.91	0	3.5	13±4	72±9	16±6	0.7	16.9	0.88	0.01	3.5
152	(Unknown)-438.8-Ath		143	438.79:1.50		primary cpd.		unknown	unknown		0±0	12±13	88±13	1.9	99.3	0.91	0	9.7	0±0	9±9	91±9	1.8	83.9	0.92	0	9		0±0	13±13	90±17	1.9	94.9	0.91	0	9.4	0±0	9±9	92±11	1.8	81.8	0.92	0	8.9
153	(Unknown)-443.2-Ath		117	443.18:1.50		primary cpd.		unknown	unknown		86±19	11±19	3±4	1.1	39.7	0.99	0	5.6	89±9	6±9	5±5	1.1	32.9	0.98	0	5.5		88±22	11±20	4±4	1.1	33.9	0.99	0	5.2	90±10	7±10	6±5	1.1	30.7	0.98	0	5.1
154	(Unknown)-448.8-Ath		245	448.75:1.50		primary cpd.		unknown	unknown		0±0	27±20	73±20	2.6	170	0.76	0.03	12.7	0±0	28±11	72±11	2.6	172.2	0.77	0.02	13.1		0±0	26±17	73±20	2.5	169	0.76	0.03	12.7	0±0	27±11	72±11	2.6	171.7	0.78	0.02	13.1
155	(Unknown)-449.4-Ath		130	449.36:1.50		primary cpd.		unknown	unknown		0±0	53±12	47±12	1.8	129	0.82	0.03	9.8	0±1	52±12	47±12	2	109.8	0.78	0.03	10		0±0	54±12	47±12	1.8	128.3	0.82	0.03	10	0±1	54±12	47±12	2	109.4	0.79	0.03	10.1
156	(Unknown)-454.1-Ath		204	454.07:1.50		primary cpd.		unknown	unknown		0±0	30±17	70±17	2.1	112.5	0.84	0.01	10.6	0±0	31±9	69±9	2.1	116.3	0.83	0.01	11		0±0	30±14	70±16	2.1	111.9	0.84	0.01	10.6	0±0	30±8	69±9	2.1	116.1	0.83	0.01	11
157	(Unknown)-459.1-Ath		114	459.08:1.50		primary cpd.		unknown	unknown		0±0	4±7	96±7	2.1	120.1	0.95	0	10.5	0±0	1±3	99±3	1.9	104.5	0.95	0	9.7		0±0	4±7	103±13	1.9	101.6	0.95	0	9.6	0±0	1±3	104±6	1.8	91.5	0.95	0	9
158	(Unknown)-463.6-Ath		172	463.61:1.50		primary cpd.		unknown	unknown		24±5	70±11	6±10	1.1	39.7	0.8	0.03	5.2	24±6	70±12	6±8	1.1	34.4	0.83	0.02	5.1		24±5	70±9	6±9	1.1	39.4	0.8	0.03	5.1	24±6	69±12	6±8	1.1	34.2	0.83	0.02	5
159	(Unknown)-465.9-Ath		117	465.94:1.50		primary cpd.		unknown	unknown		23±24	58±29	19±8	1.1	35.1	0.77	0.05	5.3	20±16	62±22	17±11	1.2	42.2	0.74	0.07	5.9		23±24	58±28	19±8	1.1	34.5	0.77	0.05	5.1	20±16	62±22	17±11	1.2	41.9	0.75	0.07	5.8
160	(Unknown)-468.7-Ath		155	468.69:1.50		primary cpd.		unknown	unknown		56±4	44±4	0±0	1.1	40.7	0.95	0	6.1	56±5	44±5	0±1	1.2	37.2	0.95	0	5.8		56±3	44±4	0±0	1.1	40.1	0.95	0	5.9	56±5	43±5	0±1	1.2	36.9	0.95	0	5.7
161	(Unknown)-471.0-Ath		158	471.01:1.50		primary cpd.		unknown	unknown		0±1	61±6	39±6	1.3	68.5	0.85	0.02	6.2	1±2	59±11	40±10	1.3	51.4	0.85	0.02	5.9		0±1	61±5	39±6	1.3	68.2	0.86	0.02	6.4	1±2	60±12	40±10	1.3	51.2	0.85	0.02	6
162	(Unknown)-484.4-Ath		170	483.97:1.50		primary cpd.		unknown	unknown		1±1	57±12	42±12	1.2	37.5	0.89	0.01	6.2	1±2	58±10	41±9	1.2	38.1	0.89	0.01	5.9		1±1	58±10	41±12	1.2	37	0.89	0.01	6.1	1±2	58±9	41±9	1.2	37.9	0.89	0.01	5.9
163	(Unknown)-492.6-Ath		154	492.55:1.50		primary cpd.		unknown	unknown		92±8	8±8	0±0	1.8	92.7	0.96	0	9.4	94±6	6±6	0±0	1.6	70.7	0.97	0	8.2		94±11	7±6	0±0	1.8	87.8	0.96	0	9	95±7	5±6	0±0	1.6	68.4	0.97	0	8
[truncated: 3,768 more rows]

## Sheet: summary
			Peak Information					Annotation								compartmental distribution (mean)				cluster-spread on normalized Manhattan distance						classification using identification tree				k-medoids clustering (PAM)		classification using k nearest neighbor (with k=3)					bestfit: subcellular distribution									bestfit: insufficiently explained
[truncated: 3,933 more rows]
